# Supplementary material for: IGF2 mRNA binding protein-2 is a tumor promoter that drives cancer proliferation through its client mRNAs IGF2 and HMGA1
Source: eLife journal article supplement (doi:10.7554/elife.27155), 2017-07-28
Supplement: supp [file elife_poa_e27155_Fig.1_Source_Data_File.xlsx]

## Sheet: Fig 1A-B
Amplification freq						TCGA Expression
	IGF2BP1	IGF2BP2	IGF2BP3			Sample	Cancer Type	IGF2BP1	IGF2BP2	IGF2BP3
ACC	2.3	3.4	3.4			TCGA.OR.A5J1.01	acc	28.8184	755.043	12.488
BLCA	2.4	6.3	7.9			TCGA.OR.A5J2.01	acc	8.0526	1554.56	8.8579
BRCA	7	3.6	2.3			TCGA.OR.A5J3.01	acc	8.2951	23.7002	31.4028
CESC	2.6	17.3	1			TCGA.OR.A5J5.01	acc	1.5492	28.66	24.0124
CHOL	0	2.9	0			TCGA.OR.A5J6.01	acc	0	219.631	20.1188
DLBC	0	6.3	4.2			TCGA.OR.A5J7.01	acc	50.5415	1069.39	157.641
ESCA	1.6	20.1	7.6			TCGA.OR.A5J8.01	acc	578.947	1380.85	287.194
GBM	1.5	1.8	1.5			TCGA.OR.A5J9.01	acc	0.34	39.7777	5.0997
HNSC	0.7	20.1	1.4			TCGA.OR.A5JA.01	acc	12.1564	6.871	30.6554
LAML	0	0	1.1			TCGA.OR.A5JB.01	acc	8.9117	494.152	3.5647
LGG	0.4	0.7	1.1			TCGA.OR.A5JC.01	acc	2.5445	329.517	19.7201
LIHC	2.1	2.1	2.6			TCGA.OR.A5JD.01	acc	0	6.6748	33.3738
LUAD	3	4.3	8.3			TCGA.OR.A5JE.01	acc	0.5656	1054.86	23.7557
LUSC	2.2	50.6	3.4			TCGA.OR.A5JF.01	acc	555.652	45.1781	43.6336
MESO	5.7	0	0			TCGA.OR.A5JG.01	acc	0.5374	3.7619	30.6328
OV	2.3	27.7	3.9			TCGA.OR.A5JI.01	acc	2.7752	26.827	26.827
PAAD	3.4	2.1	2.1			TCGA.OR.A5JJ.01	acc	6.2472	4.9085	15.1718
PRAD	2.1	3.9	2.4			TCGA.OR.A5JK.01	acc	5.3394	55.6827	24.4088
SARC	3.3	2.5	5			TCGA.OR.A5JL.01	acc	84.5666	16.4435	203.43
SKCM	6.5	1.8	4.3			TCGA.OR.A5JM.01	acc	812.931	1178.45	457.759
STAD	4.2	6.3	4.9			TCGA.OR.A5JO.01	acc	0	404.936	12.4181
THCA	0.3	0	0.3			TCGA.OR.A5JP.01	acc	8.3443	1616.6	242.424
THYM	0	0	0			TCGA.OR.A5JQ.01	acc	1.9906	35.8316	41.8035
UCEC	5	10.3	5			TCGA.OR.A5JR.01	acc	0.939	408.451	18.7793
						TCGA.OR.A5JS.01	acc	52.1643	11.8387	27.7469
						TCGA.OR.A5JT.01	acc	0	107.545	11.3704
						TCGA.OR.A5JV.01	acc	1.5576	531.153	240.914
						TCGA.OR.A5JW.01	acc	0.4388	0.8776	59.2365
						TCGA.OR.A5JX.01	acc	5.1889	10.3778	25.9445
						TCGA.OR.A5JY.01	acc	4678.01	1691.45	854.008
						TCGA.OR.A5JZ.01	acc	1.3434	54.4081	9.4039
						TCGA.OR.A5K0.01	acc	51.2685	188.161	7.3996
						TCGA.OR.A5K1.01	acc	0	319.646	25.671
						TCGA.OR.A5K2.01	acc	0.8637	1422.59	4.3187
						TCGA.OR.A5K3.01	acc	0	474.774	99.6119
						TCGA.OR.A5K4.01	acc	0	261.645	20.7299
						TCGA.OR.A5K5.01	acc	2.7561	3062.01	177.308
						TCGA.OR.A5K6.01	acc	131.752	12.6199	20.1918
						TCGA.OR.A5K8.01	acc	0	4.3541	68.2148
						TCGA.OR.A5K9.01	acc	5.277	1.759	1.3193
						TCGA.OR.A5KO.01	acc	0.4686	17.8069	18.2755
						TCGA.OR.A5KT.01	acc	0.9634	78.0347	14.4509
						TCGA.OR.A5KU.01	acc	4.4851	8.2228	12.7079
						TCGA.OR.A5KV.01	acc	26.9958	177.401	10.7983
						TCGA.OR.A5KW.01	acc	3.2402	11.8807	25.3814
						TCGA.OR.A5KX.01	acc	0	1538.72	37.7629
						TCGA.OR.A5KY.01	acc	2.2136	10.1826	19.0371
						TCGA.OR.A5KZ.01	acc	13.3333	1876.36	64.8485
						TCGA.OR.A5L3.01	acc	3.3482	328.125	20.0893
						TCGA.OR.A5L4.01	acc	1.4187	16.3149	26.9551
						TCGA.OR.A5L5.01	acc	0	134.899	11.4691
						TCGA.OR.A5L6.01	acc	3.7383	5.6075	28.0374
						TCGA.OR.A5L8.01	acc	0	14.3655	13.5674
						TCGA.OR.A5L9.01	acc	32.2581	118.28	32.2581
						TCGA.OR.A5LA.01	acc	2.6619	34.6051	13.3097
						TCGA.OR.A5LB.01	acc	1.865	4.6625	99.7785
						TCGA.OR.A5LC.01	acc	24.4233	495.251	22.3881
						TCGA.OR.A5LD.01	acc	2.7137	3727.27	14.9254
						TCGA.OR.A5LE.01	acc	602.121	781.711	847.52
						TCGA.OR.A5LG.01	acc	0.91	1035.15	22.7505
						TCGA.OR.A5LH.01	acc	156.99	239.885	427.439
						TCGA.OR.A5LJ.01	acc	530.581	17.6189	11.5782
						TCGA.OR.A5LK.01	acc	1.6949	23.7288	94.9153
						TCGA.OR.A5LL.01	acc	1.1964	8.3745	31.7033
						TCGA.OR.A5LM.01	acc	1.801	72.64	42.6234
						TCGA.OR.A5LN.01	acc	0	9.2486	45.0867
						TCGA.OR.A5LO.01	acc	0	9.1302	104.757
						TCGA.OR.A5LP.01	acc	3.0853	37.9053	17.1896
						TCGA.OR.A5LR.01	acc	0	85.3556	14.2259
						TCGA.OR.A5LS.01	acc	6.7762	7.4538	38.6244
						TCGA.OR.A5LT.01	acc	2.551	16.1565	14.4558
						TCGA.OU.A5PI.01	acc	1.1403	8.5519	48.4607
						TCGA.P6.A5OF.01	acc	28.158	18.3809	22.2917
						TCGA.P6.A5OG.01	acc	1.7339	1187.26	748.591
						TCGA.PA.A5YG.01	acc	0	18.9552	19.8798
						TCGA.PK.A5H8.01	acc	0	656.465	15.6152
						TCGA.PK.A5H9.01	acc	6.2811	654.279	3.4895
						TCGA.PK.A5HA.01	acc	0	13.2304	23.1533
						TCGA.PK.A5HB.01	acc	0	17.6423	9.2221
						TCGA.2F.A9KO.01	blca	4.6647	323.615	378.426
						TCGA.2F.A9KP.01	blca	7.0745	12.4844	44.1115
						TCGA.2F.A9KQ.01	blca	1.3908	11.1266	6.0269
						TCGA.2F.A9KR.01	blca	3.324	13.2962	2.3743
						TCGA.2F.A9KT.01	blca	2081.4	383.267	877.897
						TCGA.2F.A9KW.01	blca	1287.57	35.0822	1658.81
						TCGA.4Z.AA7M.01	blca	99.1285	267.429	1415.58
						TCGA.4Z.AA7N.01	blca	147.814	186.571	410.095
						TCGA.4Z.AA7O.01	blca	0.665	247.381	764.09
						TCGA.4Z.AA7Q.01	blca	5.298	78.8079	1113.24
						TCGA.4Z.AA7R.01	blca	4.4504	751.669	5.7855
						TCGA.4Z.AA7S.01	blca	0	8.2369	5.0337
						TCGA.4Z.AA7W.01	blca	0	1227.59	111.421
						TCGA.4Z.AA7Y.01	blca	0	18.816	6.8839
						TCGA.4Z.AA80.01	blca	490.073	25.6659	482.809
						TCGA.4Z.AA81.01	blca	121.763	2274.93	9.3664
						TCGA.4Z.AA82.01	blca	21.1198	817.78	93.3202
						TCGA.4Z.AA83.01	blca	3.9604	1.3201	3.3003
						TCGA.4Z.AA84.01	blca	9.8971	948.561	307.332
						TCGA.4Z.AA86.01	blca	2.3435	1573.49	140.609
						TCGA.4Z.AA87.01	blca	657.009	753.765	677.29
						TCGA.4Z.AA89.01	blca	0.5735	29.8208	5.1613
						TCGA.5N.A9KI.01	blca	0.8686	575.027	844.734
						TCGA.5N.A9KM.01	blca	0.4854	31.068	6.3107
						TCGA.BL.A0C8.01	blca	0	4.6674	6.4177
						TCGA.BL.A13I.01	blca	858.819	820.793	763.35
						TCGA.BL.A13J.01	blca	2.0822	996.703	72.8787
						TCGA.BL.A3JM.01	blca	6.5704	438.847	6.8442
						TCGA.BL.A5ZZ.01	blca	964.38	1219.68	430.396
						TCGA.BT.A0S7.01	blca	3.0488	294.969	172.256
						TCGA.BT.A0YX.01	blca	0.5408	345.051	469.443
						TCGA.BT.A20J.01	blca	28.083	436.508	359.585
						TCGA.BT.A20N.01	blca	1.6251	531.961	1521.13
						TCGA.BT.A20O.01	blca	4.5506	521.805	521.299
						TCGA.BT.A20P.01	blca	0	26.4244	28.9017
						TCGA.BT.A20Q.01	blca	0.9407	69.6143	24.4591
						TCGA.BT.A20R.01	blca	2.6008	99.6966	1268.75
						TCGA.BT.A20T.01	blca	4.0064	217.146	7.2115
						TCGA.BT.A20U.01	blca	42.4337	345.345	101.841
						TCGA.BT.A20V.01	blca	103.768	2612.72	869.673
						TCGA.BT.A20W.01	blca	108.056	232.737	48.5934
						TCGA.BT.A20X.01	blca	8.919	2532.62	333.883
						TCGA.BT.A2LA.01	blca	935.939	1547.46	818.102
						TCGA.BT.A2LB.01	blca	3.204	103.952	1066.22
						TCGA.BT.A2LD.01	blca	744.766	2272.68	1150.55
						TCGA.BT.A3PH.01	blca	0	6.2893	3.8435
						TCGA.BT.A3PJ.01	blca	0.3189	3157.84	411.033
						TCGA.BT.A3PK.01	blca	11.8343	1042.96	421.662
						TCGA.BT.A42C.01	blca	5.1818	7.7726	7.1249
						TCGA.BT.A42E.01	blca	494.447	3223.01	1170.15
						TCGA.BT.A42F.01	blca	0	101.759	11.8878
						TCGA.C4.A0EZ.01	blca	0.3671	18.7242	6.9757
						TCGA.C4.A0F0.01	blca	0.6636	1177.26	12.6088
						TCGA.C4.A0F1.01	blca	3.2159	1700.66	4.8238
						TCGA.C4.A0F6.01	blca	0	62.5115	2218.05
						TCGA.C4.A0F7.01	blca	1409.85	1413.6	1757.16
						TCGA.CF.A1HR.01	blca	4.4868	29.1643	8.9736
						TCGA.CF.A1HS.01	blca	723.849	1823.07	858.338
						TCGA.CF.A27C.01	blca	0	6.2052	3.8782
						TCGA.CF.A3MF.01	blca	1.0596	10.596	5.298
						TCGA.CF.A3MG.01	blca	0	5.6872	0.9479
						TCGA.CF.A3MH.01	blca	0	123.745	95.6207
						TCGA.CF.A3MI.01	blca	0	4.9235	145.595
						TCGA.CF.A47S.01	blca	0	3.8226	3.5678
						TCGA.CF.A47T.01	blca	3.6254	509.366	5.4381
						TCGA.CF.A47V.01	blca	2.4275	9.2244	1.942
						TCGA.CF.A47W.01	blca	0	46.2264	4.2453
						TCGA.CF.A47X.01	blca	0	3.2632	0.7252
						TCGA.CF.A47Y.01	blca	0.5737	8.0321	8.0321
						TCGA.CF.A5U8.01	blca	0	1.0571	7.3996
						TCGA.CF.A5UA.01	blca	0	7.4553	7.4553
						TCGA.CF.A7I0.01	blca	1.1514	17.8469	1.1514
						TCGA.CF.A8HX.01	blca	0.6105	7.326	5.4945
						TCGA.CF.A8HY.01	blca	123.381	111.793	6.8166
						TCGA.CF.A9FF.01	blca	1.6367	17.1852	6.5467
						TCGA.CF.A9FH.01	blca	1.1519	10.367	21.3099
						TCGA.CF.A9FL.01	blca	518.101	776.01	763.457
						TCGA.CF.A9FM.01	blca	0.464	4.1761	6.0321
						TCGA.CU.A0YN.01	blca	0.4206	2843.49	691.523
						TCGA.CU.A0YO.01	blca	0.5305	29.1777	437.135
						TCGA.CU.A0YR.01	blca	228.273	189.219	32.4532
						TCGA.CU.A3KJ.01	blca	0.8416	2447.3	3.3663
						TCGA.CU.A3QU.01	blca	0	3.1781	2.5425
						TCGA.CU.A3YL.01	blca	0.9302	13.0233	5.1163
						TCGA.CU.A5W6.01	blca	1.9722	17.257	9.8612
						TCGA.CU.A72E.01	blca	2.0551	43.1566	13.1525
						TCGA.DK.A1A3.01	blca	1.0783	263.647	1635.26
						TCGA.DK.A1A5.01	blca	0.6357	328.353	18.754
						TCGA.DK.A1A6.01	blca	40.4483	50.5604	32.3586
						TCGA.DK.A1A7.01	blca	7.9486	97.218	16.5087
						TCGA.DK.A1AA.01	blca	0.9521	1.9042	10.7902
						TCGA.DK.A1AB.01	blca	8.0444	344.622	102.968
						TCGA.DK.A1AC.01	blca	778.089	68.2534	782.639
						TCGA.DK.A1AD.01	blca	0	19.1235	6.3745
						TCGA.DK.A1AE.01	blca	3.9008	26.1911	74.394
						TCGA.DK.A1AF.01	blca	14.7347	648.327	369.935
						TCGA.DK.A1AG.01	blca	0.7356	244.965	1.4713
						TCGA.DK.A2HX.01	blca	0	424.202	615.692
						TCGA.DK.A2I1.01	blca	0	119.685	10.7987
						TCGA.DK.A2I2.01	blca	0.9099	1424.93	1197
						TCGA.DK.A2I4.01	blca	236.41	659.771	310.133
						TCGA.DK.A2I6.01	blca	0.5869	278.191	6.7494
						TCGA.DK.A3IK.01	blca	192.477	73.304	35.1516
						TCGA.DK.A3IL.01	blca	0	13.882	757.065
						TCGA.DK.A3IM.01	blca	6.1623	2740.5	15.0633
						TCGA.DK.A3IN.01	blca	1316.64	856.075	1076.64
						TCGA.DK.A3IQ.01	blca	0.5128	481.538	220.513
						TCGA.DK.A3IS.01	blca	7.8132	73.3758	7.4735
						TCGA.DK.A3IT.01	blca	87.5394	23.6593	159.306
						TCGA.DK.A3IU.01	blca	38.4763	2682.95	948.057
						TCGA.DK.A3IV.01	blca	1.7482	31.4677	2276.16
						TCGA.DK.A3WW.01	blca	0.9488	2707.31	935.01
						TCGA.DK.A3WX.01	blca	38.4081	404.92	453.952
						TCGA.DK.A3WY.01	blca	62.5268	367.88	256.959
						TCGA.DK.A3X1.01	blca	1.6837	53.3184	10.6637
						TCGA.DK.A3X2.01	blca	8.2343	111.163	4.8657
						TCGA.DK.A6AV.01	blca	20.9125	16.4766	964.512
						TCGA.DK.A6AW.01	blca	5.3699	73.389	5.3699
						TCGA.DK.A6B0.01	blca	0	6.7543	1.9298
						TCGA.DK.A6B1.01	blca	0.9908	5.9449	2.3119
						TCGA.DK.A6B2.01	blca	135.678	180.067	649.497
						TCGA.DK.A6B5.01	blca	14.2	42.2619	5.0714
						TCGA.DK.A6B6.01	blca	26.1251	5.9375	37.4064
						TCGA.DK.AA6L.01	blca	0.5211	1542.99	351.225
						TCGA.DK.AA6M.01	blca	0	524.74	124.777
						TCGA.DK.AA6P.01	blca	0.5635	34.3707	11.2691
						TCGA.DK.AA6Q.01	blca	216.793	771.983	65.4782
						TCGA.DK.AA6R.01	blca	0	2059.38	10.9694
						TCGA.DK.AA6S.01	blca	674.21	682.296	371.313
						TCGA.DK.AA6T.01	blca	4.6296	76.9676	1652.78
						TCGA.DK.AA6U.01	blca	19.6176	710.438	1121.36
						TCGA.DK.AA6W.01	blca	4732.02	1338.2	647.55
						TCGA.DK.AA6X.01	blca	40.8163	861.852	445.055
						TCGA.DK.AA71.01	blca	1.2422	9.3168	37.2671
						TCGA.DK.AA74.01	blca	14.5059	663.645	57.117
						TCGA.DK.AA75.01	blca	148.858	49.3151	505.936
						TCGA.DK.AA76.01	blca	10.5336	14.2204	447.679
						TCGA.DK.AA77.01	blca	0.9583	88.1648	11.4998
						TCGA.E5.A2PC.01	blca	0	6.2814	5.0251
						TCGA.E5.A4TZ.01	blca	90.9163	703.572	666.192
						TCGA.E5.A4U1.01	blca	107.484	8.6218	7.4722
						TCGA.E7.A3X6.01	blca	0.8457	406.765	8.0338
						TCGA.E7.A3Y1.01	blca	0	206.192	3.5047
						TCGA.E7.A4IJ.01	blca	141.447	245.614	1177.08
						TCGA.E7.A4XJ.01	blca	56.3793	47.5929	259.93
						TCGA.E7.A519.01	blca	7.0423	32.1932	0
						TCGA.E7.A541.01	blca	0	14.2717	401.575
						TCGA.E7.A5KE.01	blca	0	1.2658	1279.75
						TCGA.E7.A5KF.01	blca	0.3922	1.5686	7.0588
						TCGA.E7.A677.01	blca	3.8233	7.9197	16.3856
						TCGA.E7.A678.01	blca	1.9569	7.8278	3.9139
						TCGA.E7.A6MD.01	blca	0	41.7085	6.5327
						TCGA.E7.A6ME.01	blca	5.9583	191.162	295.928
						TCGA.E7.A6MF.01	blca	0	554.72	2.5602
						TCGA.E7.A7DU.01	blca	0	35.3045	5.2957
						TCGA.E7.A7DV.01	blca	15.2836	496.522	103.85
						TCGA.E7.A7PW.01	blca	18.1681	194.55	10.598
						TCGA.E7.A7XN.01	blca	893.764	1521.32	30.5645
						TCGA.E7.A85H.01	blca	0.7871	33.4514	16.5289
						TCGA.E7.A8O7.01	blca	1.0074	49.6982	5.037
						TCGA.E7.A8O8.01	blca	123.496	529.449	9.4997
						TCGA.E7.A97P.01	blca	1.924	2084.18	45.214
						TCGA.E7.A97Q.01	blca	226.218	364.901	720.838
						TCGA.FD.A3B3.01	blca	545.701	1993.06	333.635
						TCGA.FD.A3B4.01	blca	3.2712	1050.39	76.8734
						TCGA.FD.A3B5.01	blca	1421.46	1615.04	1425.52
						TCGA.FD.A3B6.01	blca	0	2003.4	697.182
						TCGA.FD.A3B7.01	blca	20.1263	1211.13	56.4325
						TCGA.FD.A3B8.01	blca	21.9577	752.726	426.827
						TCGA.FD.A3N5.01	blca	0.613	2653.59	464.026
						TCGA.FD.A3N6.01	blca	0	1215.06	4.8797
						TCGA.FD.A3NA.01	blca	2.6543	111.811	5.6403
						TCGA.FD.A3SJ.01	blca	2.6984	20.3883	7.7955
						TCGA.FD.A3SL.01	blca	0	70.1588	5.6886
						TCGA.FD.A3SM.01	blca	6.4224	65.9363	50.5226
						TCGA.FD.A3SN.01	blca	0	859.174	843.625
						TCGA.FD.A3SO.01	blca	0.4421	629.973	107.869
						TCGA.FD.A3SP.01	blca	192.26	1031.29	639.769
						TCGA.FD.A3SQ.01	blca	1.2651	72.9565	4.6388
						TCGA.FD.A3SR.01	blca	100.62	504.866	1182.73
						TCGA.FD.A3SS.01	blca	6.8729	881.443	1647.08
						TCGA.FD.A43N.01	blca	1.5949	504.386	525.917
						TCGA.FD.A43P.01	blca	741.201	533.126	1152.52
						TCGA.FD.A43S.01	blca	5.6208	121.104	27.0823
						TCGA.FD.A43U.01	blca	32.8717	172.293	74.2447
						TCGA.FD.A43X.01	blca	0.3923	0.3923	4.7077
						TCGA.FD.A43Y.01	blca	525.747	1569.61	439.924
						TCGA.FD.A5BR.01	blca	154.832	432.461	1000.53
						TCGA.FD.A5BS.01	blca	26.7775	267.775	240.074
						TCGA.FD.A5BT.01	blca	599.298	837.193	569.123
						TCGA.FD.A5BU.01	blca	0.5328	562.067	359.084
						TCGA.FD.A5BV.01	blca	513.111	1153.08	759.036
						TCGA.FD.A5BX.01	blca	622.368	860.526	25.6579
						TCGA.FD.A5BY.01	blca	2.9134	1003.45	186.455
						TCGA.FD.A5BZ.01	blca	1.171	241.218	97.7752
						TCGA.FD.A5C0.01	blca	1.6136	20.5728	4.0339
						TCGA.FD.A5C1.01	blca	0	386.696	256.244
						TCGA.FD.A62N.01	blca	1.065	1430.78	167.199
						TCGA.FD.A62O.01	blca	0	9.46	6.3067
						TCGA.FD.A62P.01	blca	23.4812	78.6348	795.631
						TCGA.FD.A62S.01	blca	308.648	1037.11	778.949
						TCGA.FD.A6TA.01	blca	1.7773	65.1659	18.3649
						TCGA.FD.A6TB.01	blca	55.1172	1443.27	182.687
						TCGA.FD.A6TC.01	blca	75.8545	130.099	371.334
						TCGA.FD.A6TD.01	blca	1.0116	1844.71	720.789
						TCGA.FD.A6TE.01	blca	0.6309	521.767	15.142
						TCGA.FD.A6TF.01	blca	0.415	745.798	1296.12
						TCGA.FD.A6TG.01	blca	361.909	173.878	545.087
						TCGA.FD.A6TH.01	blca	73.0401	1681.55	1377.05
						TCGA.FD.A6TI.01	blca	0.7133	15.3352	4.9929
						TCGA.FD.A6TK.01	blca	190.578	1007.4	770.898
						TCGA.FJ.A3Z7.01	blca	647.672	284.314	343.137
						TCGA.FJ.A3Z9.01	blca	1.2438	99.5025	60.3234
						TCGA.FJ.A3ZE.01	blca	3.9651	17.4465	188.343
						TCGA.FJ.A3ZF.01	blca	29.6073	127.19	1639.27
						TCGA.FJ.A871.01	blca	5026.36	1221.69	6.4823
						TCGA.FT.A3EE.01	blca	1.7548	1158.18	2253.2
						TCGA.FT.A61P.01	blca	0.9862	2663.22	11.8343
						TCGA.G2.A2EC.01	blca	1.6388	45.8875	176.995
						TCGA.G2.A2EF.01	blca	3201.57	3434.06	1896.04
						TCGA.G2.A2EJ.01	blca	1055.4	4381.93	1072.02
						TCGA.G2.A2EK.01	blca	16.8602	15.7362	3.372
						TCGA.G2.A2EL.01	blca	1.2225	16.5037	3.9731
						TCGA.G2.A2EO.01	blca	0.9788	137.033	169.333
						TCGA.G2.A2ES.01	blca	0.3743	1252.27	5.6139
						TCGA.G2.A3IB.01	blca	366.112	1138.05	1198.94
						TCGA.G2.A3IE.01	blca	37.9022	43.1908	893.345
						TCGA.G2.A3VY.01	blca	20.4342	26.1814	15.645
						TCGA.G2.AA3B.01	blca	0	8.8418	172.047
						TCGA.G2.AA3C.01	blca	524.847	986.989	316.664
						TCGA.G2.AA3D.01	blca	92.1566	47.8409	446.683
						TCGA.G2.AA3F.01	blca	0	294.122	7.1543
						TCGA.GC.A3BM.01	blca	10.6287	565.775	295.151
						TCGA.GC.A3I6.01	blca	98.9231	1060.28	860.867
						TCGA.GC.A3OO.01	blca	0	81.4125	8.3374
						TCGA.GC.A3RB.01	blca	53.5684	668.387	101.354
						TCGA.GC.A3RC.01	blca	76.851	1366.92	308.81
						TCGA.GC.A3RD.01	blca	10.7004	129.864	2047.18
						TCGA.GC.A3WC.01	blca	2.0566	41.1311	24.1645
						TCGA.GC.A3YS.01	blca	0.9363	795.88	804.307
						TCGA.GC.A4ZW.01	blca	6.6882	190.837	12.4847
						TCGA.GC.A6I1.01	blca	13.6411	3009.97	211.438
						TCGA.GC.A6I3.01	blca	0	229.766	81.5298
						TCGA.GD.A2C5.01	blca	25.5923	27.1918	13.9958
						TCGA.GD.A3OP.01	blca	0	52.8002	3.6624
						TCGA.GD.A3OQ.01	blca	3.0086	1950.81	95.3742
						TCGA.GD.A3OS.01	blca	2016.25	1517.77	453.794
						TCGA.GD.A6C6.01	blca	8.8865	52.6357	115.525
						TCGA.GD.A76B.01	blca	0.8819	46.7424	7.4964
						TCGA.GU.A42P.01	blca	1470.23	785.624	7.5997
						TCGA.GU.A42Q.01	blca	1124.48	1891.59	1357.79
						TCGA.GU.A42R.01	blca	15.0999	187.239	192.416
						TCGA.GU.A762.01	blca	160.264	1803.09	334.402
						TCGA.GU.A763.01	blca	1.2173	10.5497	11.3612
						TCGA.GU.A764.01	blca	287.584	1579.14	683.764
						TCGA.GU.A766.01	blca	941.41	2201.44	817.552
						TCGA.GU.A767.01	blca	6.8027	58.6081	29.304
						TCGA.GU.AATO.01	blca	3.6134	31.7977	46.9738
						TCGA.GU.AATP.01	blca	806.735	722.548	642.02
						TCGA.GU.AATQ.01	blca	2.6954	1121.29	74.5732
						TCGA.GV.A3JV.01	blca	0	21.8281	8.7312
						TCGA.GV.A3JW.01	blca	0.3425	5.4794	12.671
						TCGA.GV.A3JX.01	blca	210.817	476.01	425.124
						TCGA.GV.A3JZ.01	blca	453.273	960.976	13.1383
						TCGA.GV.A3QF.01	blca	0.4767	5.7204	0.4767
						TCGA.GV.A3QG.01	blca	553.449	61.7849	1218.7
						TCGA.GV.A3QH.01	blca	172.473	443.056	890.798
						TCGA.GV.A3QI.01	blca	132.572	32.4123	140.808
						TCGA.GV.A3QK.01	blca	3.0019	22.8893	5.6285
						TCGA.GV.A40E.01	blca	29.2786	1487.6	1360.86
						TCGA.GV.A40G.01	blca	58.8428	54.9199	438.705
						TCGA.GV.A6ZA.01	blca	0.9737	298.929	4.3817
						TCGA.H4.A2HO.01	blca	3.1314	10.6466	10.0204
						TCGA.H4.A2HQ.01	blca	521.204	750.114	1022.8
						TCGA.HQ.A2OE.01	blca	2749.36	13.629	268.422
						TCGA.HQ.A2OF.01	blca	6319.04	1669.53	5.3105
						TCGA.HQ.A5ND.01	blca	3.1461	1416.18	22.0225
						TCGA.HQ.A5NE.01	blca	7.3213	854.005	797.158
						TCGA.K4.A3WS.01	blca	3.3622	177.714	618.156
						TCGA.K4.A3WU.01	blca	227.918	129.953	78.3051
						TCGA.K4.A3WV.01	blca	183.303	2021	655.988
						TCGA.K4.A4AB.01	blca	0	411.779	130.716
						TCGA.K4.A4AC.01	blca	0.5485	1291.11	23.5844
						TCGA.K4.A54R.01	blca	24.1638	357.153	14.7341
						TCGA.K4.A5RH.01	blca	183.803	905.506	27.9805
						TCGA.K4.A5RI.01	blca	1.2806	510.113	554.934
						TCGA.K4.A5RJ.01	blca	0.5666	424.363	571.671
						TCGA.K4.A6FZ.01	blca	207.578	581.426	357.668
						TCGA.K4.A6MB.01	blca	551.836	314.615	146.508
						TCGA.K4.A83P.01	blca	5.1778	119.521	38.8335
						TCGA.K4.AAQO.01	blca	10.018	62.3344	156.949
						TCGA.KQ.A41N.01	blca	7.0876	11.5979	1.933
						TCGA.KQ.A41O.01	blca	1.8883	2.5177	445.004
						TCGA.KQ.A41P.01	blca	217.501	309.757	347.218
						TCGA.KQ.A41Q.01	blca	9.8817	32.7656	4.1607
						TCGA.KQ.A41R.01	blca	0	8.8261	102.383
						TCGA.KQ.A41S.01	blca	0.4505	81.5315	450.901
						TCGA.LC.A66R.01	blca	2.9028	1280.84	856.313
						TCGA.LT.A5Z6.01	blca	43.1169	11.9481	28.0519
						TCGA.LT.A8JT.01	blca	18.3692	6.5313	5.3067
						TCGA.MV.A51V.01	blca	3.075	119.311	11.6851
						TCGA.PQ.A6FI.01	blca	1.7632	2176.5	253.901
						TCGA.PQ.A6FN.01	blca	1.1192	1369.33	148.853
						TCGA.R3.A69X.01	blca	0	37.6892	4.9491
						TCGA.S5.A6DX.01	blca	270.039	41.2451	7.0039
						TCGA.S5.AA26.01	blca	0.7199	309.566	20.1578
						TCGA.SY.A9G0.01	blca	0	57.4637	743.725
						TCGA.SY.A9G5.01	blca	2.8417	942.313	138.107
						TCGA.UY.A78K.01	blca	21.7928	21.3816	80.1809
						TCGA.UY.A78L.01	blca	0.8358	840.368	21.3122
						TCGA.UY.A78M.01	blca	5.717	72.8919	8.5755
						TCGA.UY.A78N.01	blca	2.3319	18.6554	13.2142
						TCGA.UY.A78O.01	blca	5.1635	10.9007	41.3081
						TCGA.UY.A78P.01	blca	3.1319	459.872	264.648
						TCGA.UY.A8OB.01	blca	0.6201	1480.08	173.617
						TCGA.UY.A8OC.01	blca	83.0017	2404.78	3.9795
						TCGA.UY.A8OD.01	blca	19.7409	49.9692	198.026
						TCGA.UY.A9PA.01	blca	2.4631	657.635	238.916
						TCGA.UY.A9PB.01	blca	468.384	1788.13	874.501
						TCGA.UY.A9PD.01	blca	3.0052	50.3378	6.7618
						TCGA.UY.A9PE.01	blca	321.59	32.5203	246.613
						TCGA.UY.A9PF.01	blca	0.9091	20.9091	7.2727
						TCGA.UY.A9PH.01	blca	0	1199.8	382.604
						TCGA.XF.A8HB.01	blca	1.0303	767.923	151.112
						TCGA.XF.A8HC.01	blca	0.5923	1.777	1.1846
						TCGA.XF.A8HD.01	blca	1.8235	763.676	303.428
						TCGA.XF.A8HE.01	blca	649.837	289.89	1029.11
						TCGA.XF.A8HF.01	blca	1.7016	24.9575	873.511
						TCGA.XF.A8HG.01	blca	0	3.677	18.3852
						TCGA.XF.A8HH.01	blca	0.5721	46.3387	8.5812
						TCGA.XF.A8HI.01	blca	1.9474	16.5531	6.3291
						TCGA.XF.A9SH.01	blca	0.92	23.919	2.7599
						TCGA.XF.A9SI.01	blca	11.713	47.3402	444.607
						TCGA.XF.A9SJ.01	blca	5.1653	477.273	170.454
						TCGA.XF.A9SK.01	blca	13.1076	815.948	9.8307
						TCGA.XF.A9SL.01	blca	3.1898	90.9091	31.3663
						TCGA.XF.A9SM.01	blca	2.924	1400.58	746.589
						TCGA.XF.A9SP.01	blca	352.966	189.596	319.09
						TCGA.XF.A9ST.01	blca	4760.17	622.198	3311.23
						TCGA.XF.A9SU.01	blca	524.779	128.31	372.709
						TCGA.XF.A9SV.01	blca	0	42.735	4.7483
						TCGA.XF.A9SW.01	blca	1.0384	98.6501	234.683
						TCGA.XF.A9SX.01	blca	20.4015	843.747	380.342
						TCGA.XF.A9SY.01	blca	1371.05	2841.57	2611.67
						TCGA.XF.A9SZ.01	blca	2.8425	391.7	456.509
						TCGA.XF.A9T0.01	blca	4.2508	82.8905	422.423
						TCGA.XF.A9T2.01	blca	28.2752	568.332	73.5156
						TCGA.XF.A9T3.01	blca	2.1209	1136.8	314.952
						TCGA.XF.A9T4.01	blca	2.2615	2200.42	408.198
						TCGA.XF.A9T5.01	blca	34.2635	161.445	81.8839
						TCGA.XF.A9T6.01	blca	140.371	1272.54	616.665
						TCGA.XF.A9T8.01	blca	0	1073.88	67.7553
						TCGA.XF.AAME.01	blca	42.7323	590.051	304.737
						TCGA.XF.AAMG.01	blca	1908.56	1507.55	1081.09
						TCGA.XF.AAMH.01	blca	2890.69	1519.35	469.665
						TCGA.XF.AAMJ.01	blca	1.4482	355.539	0.7241
						TCGA.XF.AAML.01	blca	1.2563	302.136	2.5126
						TCGA.XF.AAMQ.01	blca	0.9874	130.834	13.5771
						TCGA.XF.AAMR.01	blca	1.4517	38.7818	17.2133
						TCGA.XF.AAMT.01	blca	895.334	2295.92	1847.84
						TCGA.XF.AAMW.01	blca	440.086	2078.84	524.024
						TCGA.XF.AAMX.01	blca	0	20.6349	10.0529
						TCGA.XF.AAMY.01	blca	351.876	422.403	936.567
						TCGA.XF.AAMZ.01	blca	0	43.257	13.5708
						TCGA.XF.AAN0.01	blca	53.6038	594.712	24.6288
						TCGA.XF.AAN1.01	blca	5.5402	29.7784	9.0028
						TCGA.XF.AAN2.01	blca	2.7763	1863.61	520.562
						TCGA.XF.AAN3.01	blca	8.7232	866.178	116.178
						TCGA.XF.AAN4.01	blca	56.5112	408.834	140.231
						TCGA.XF.AAN5.01	blca	13.245	2454.12	186.376
						TCGA.XF.AAN7.01	blca	0.8453	466.61	726.12
						TCGA.XF.AAN8.01	blca	2.849	377.968	30.3894
						TCGA.YC.A89H.01	blca	230.871	125.973	152.796
						TCGA.YC.A8S6.01	blca	2.6725	56.1216	5.3449
						TCGA.YC.A9TC.01	blca	1.8463	73.3892	317.097
						TCGA.YF.AA3L.01	blca	6.2241	10.3734	4.668
						TCGA.YF.AA3M.01	blca	0	1576.48	503.609
						TCGA.ZF.A9R0.01	blca	1.4567	16.0233	123.817
						TCGA.ZF.A9R1.01	blca	304.964	44.4444	551.3
						TCGA.ZF.A9R2.01	blca	1.0321	10.3212	10.8373
						TCGA.ZF.A9R3.01	blca	0	60.0206	11.629
						TCGA.ZF.A9R4.01	blca	0.42	477.53	2.9399
						TCGA.ZF.A9R5.01	blca	0.4608	4.6083	2.765
						TCGA.ZF.A9R7.01	blca	16.3964	267.332	360.007
						TCGA.ZF.A9R9.01	blca	0.8764	102.542	1.7528
						TCGA.ZF.A9RC.01	blca	547.432	363.746	153.474
						TCGA.ZF.A9RD.01	blca	4.4683	1415.55	487.936
						TCGA.ZF.A9RE.01	blca	1.0655	201.918	84.1769
						TCGA.ZF.A9RF.01	blca	6.0685	1333.77	13.4374
						TCGA.ZF.A9RL.01	blca	1.0118	3.5412	2.5294
						TCGA.ZF.A9RM.01	blca	10.8611	4.2669	162.917
						TCGA.ZF.A9RN.01	blca	2.8805	9.6015	2.8805
						TCGA.ZF.AA4N.01	blca	366.412	752.202	436.876
						TCGA.ZF.AA4R.01	blca	14.5433	394.997	11.6347
						TCGA.ZF.AA4T.01	blca	1.4577	40.3304	4.3732
						TCGA.ZF.AA4U.01	blca	0	392.499	2.6413
						TCGA.ZF.AA4V.01	blca	13.7744	68.4548	156.11
						TCGA.ZF.AA4W.01	blca	1608.69	2053.21	425.357
						TCGA.ZF.AA4X.01	blca	0	3.2016	7.2036
						TCGA.ZF.AA51.01	blca	400.904	97.2118	11.3037
						TCGA.ZF.AA52.01	blca	0.5889	170.2	493.522
						TCGA.ZF.AA53.01	blca	0	944.904	522.039
						TCGA.ZF.AA54.01	blca	1576.92	1797.06	33.4008
						TCGA.ZF.AA56.01	blca	380.238	112.484	1206
						TCGA.ZF.AA58.01	blca	585.582	2637.02	435.919
						TCGA.ZF.AA5H.01	blca	26.8511	5712.48	921.994
						TCGA.ZF.AA5N.01	blca	0	28.2209	15.9509
						TCGA.ZF.AA5P.01	blca	2.2235	85.6031	291.829
						TCGA.3C.AAAU.01	brca	3.1019	19.6456	5.5145
						TCGA.3C.AALI.01	brca	54.9212	266.449	10.8755
						TCGA.3C.AALJ.01	brca	14.5059	37.1714	9.9728
						TCGA.3C.AALK.01	brca	3.3099	15.722	2.8962
						TCGA.4H.AAAK.01	brca	1.2766	85.1064	4.6809
						TCGA.5L.AAT0.01	brca	1.7598	46.9277	4.6928
						TCGA.5L.AAT1.01	brca	3.26	55.4197	12.2249
						TCGA.5T.A9QA.01	brca	24.5816	17.7824	1.569
						TCGA.A1.A0SB.01	brca	0	34.2381	5.406
						TCGA.A1.A0SD.01	brca	6.2857	60.5409	7.9398
						TCGA.A1.A0SE.01	brca	0	35.87	2.3036
						TCGA.A1.A0SF.01	brca	2.5704	17.5645	5.5692
						TCGA.A1.A0SG.01	brca	2.52	34.2003	7.5601
						TCGA.A1.A0SH.01	brca	25.6418	159.63	5.4173
						TCGA.A1.A0SI.01	brca	2.6486	16.7746	7.063
						TCGA.A1.A0SJ.01	brca	1.4632	31.4586	5.1212
						TCGA.A1.A0SK.01	brca	10.7154	173.653	5.3577
						TCGA.A1.A0SM.01	brca	1.8939	38.5101	6.9444
						TCGA.A1.A0SN.01	brca	7.0558	99.7434	9.9423
						TCGA.A1.A0SO.01	brca	0.5407	1.3518	2.7035
						TCGA.A1.A0SP.01	brca	6.5669	751.915	379.788
						TCGA.A1.A0SQ.01	brca	0	3.6309	5.2446
						TCGA.A2.A04N.01	brca	0	16.2441	5.1506
						TCGA.A2.A04P.01	brca	3.112	57.5726	100.622
						TCGA.A2.A04Q.01	brca	1.9283	35.8658	37.4084
						TCGA.A2.A04R.01	brca	2.5355	10.8666	11.2288
						TCGA.A2.A04T.01	brca	2.4341	28.5143	135.617
						TCGA.A2.A04U.01	brca	11.9496	25.9774	141.837
						TCGA.A2.A04V.01	brca	1.2222	30.1487	9.778
						TCGA.A2.A04W.01	brca	14.0484	60.516	8.6451
						TCGA.A2.A04X.01	brca	0	19.1043	11.5346
						TCGA.A2.A04Y.01	brca	1.6728	7.0258	8.0294
						TCGA.A2.A0CK.01	brca	0.404	23.4343	2.8283
						TCGA.A2.A0CL.01	brca	107.116	39.659	22.6093
						TCGA.A2.A0CM.01	brca	9.6919	1701.17	17.5378
						TCGA.A2.A0CO.01	brca	0.4178	41.3577	10.0261
						TCGA.A2.A0CP.01	brca	2.0107	64.3432	2.681
						TCGA.A2.A0CQ.01	brca	0	7.146	4.2876
						TCGA.A2.A0CR.01	brca	0	78.921	8.0259
						TCGA.A2.A0CS.01	brca	22.1504	57.6834	1.8459
						TCGA.A2.A0CT.01	brca	4.1806	62.709	48.0769
						TCGA.A2.A0CU.01	brca	0	9.5456	6.491
						TCGA.A2.A0CV.01	brca	0	21.7761	3.4383
						TCGA.A2.A0CW.01	brca	6.3227	79.0343	4.311
						TCGA.A2.A0CX.01	brca	9.2826	15.7401	7.6682
						TCGA.A2.A0CY.01	brca	6.1387	95.1504	5.5249
						TCGA.A2.A0CZ.01	brca	11.4286	82.8571	7.619
						TCGA.A2.A0D0.01	brca	26.3591	1771.83	12.3558
						TCGA.A2.A0D1.01	brca	5.6504	13.1842	5.6504
						TCGA.A2.A0D2.01	brca	0.7392	97.579	19.2201
						TCGA.A2.A0D3.01	brca	0	7.7382	7.0933
						TCGA.A2.A0D4.01	brca	0.5325	18.371	8.2537
						TCGA.A2.A0EM.01	brca	2.8409	8.5227	4.2614
						TCGA.A2.A0EN.01	brca	3.3024	25.7589	11.5585
						TCGA.A2.A0EO.01	brca	0.3587	49.8565	5.7389
						TCGA.A2.A0EP.01	brca	3.3223	126.578	21.2625
						TCGA.A2.A0EQ.01	brca	4.1451	14.9223	31.0881
						TCGA.A2.A0ER.01	brca	1.8081	4.5204	6.0271
						TCGA.A2.A0ES.01	brca	0.3715	52.7538	9.6591
						TCGA.A2.A0ET.01	brca	0	0.5417	5.4171
						TCGA.A2.A0EU.01	brca	9.1386	69.1358	51.6531
						TCGA.A2.A0EV.01	brca	5.2632	43.5088	8.0702
						TCGA.A2.A0EW.01	brca	0	42.508	6.022
						TCGA.A2.A0EX.01	brca	0	31.5236	3.0648
						TCGA.A2.A0EY.01	brca	8.4157	19.7585	8.7816
						TCGA.A2.A0ST.01	brca	2.1388	761.844	81.7025
						TCGA.A2.A0SU.01	brca	0.861	49.505	8.1791
						TCGA.A2.A0SV.01	brca	6.7514	56.8244	5.9075
						TCGA.A2.A0SW.01	brca	10.5294	27.2011	22.8138
						TCGA.A2.A0SX.01	brca	10.5973	2228	179.191
						TCGA.A2.A0SY.01	brca	7.3171	9.4077	16.3763
						TCGA.A2.A0T0.01	brca	0.9829	139.578	21.6247
						TCGA.A2.A0T1.01	brca	8.6143	313.862	23.5958
						TCGA.A2.A0T2.01	brca	3.5667	108.783	52.1623
						TCGA.A2.A0T3.01	brca	1.5626	14.6886	11.2509
						TCGA.A2.A0T4.01	brca	3.9043	25.3782	11.713
						TCGA.A2.A0T5.01	brca	2.1884	70.7577	3.2826
						TCGA.A2.A0T6.01	brca	22.9746	76.179	5.7437
						TCGA.A2.A0T7.01	brca	7.7995	223.875	3.7553
						TCGA.A2.A0YC.01	brca	0.2847	10.82	6.549
						TCGA.A2.A0YD.01	brca	5.4755	71.5033	5.1534
						TCGA.A2.A0YE.01	brca	3.1686	55.1331	1196.13
						TCGA.A2.A0YF.01	brca	1.594	168.172	15.1435
						TCGA.A2.A0YG.01	brca	7.5472	25.9229	6.5628
						TCGA.A2.A0YH.01	brca	2.8381	26.9623	24.4789
						TCGA.A2.A0YI.01	brca	0.5963	11.0316	6.5593
						TCGA.A2.A0YJ.01	brca	1.6273	216.843	188.364
						TCGA.A2.A0YK.01	brca	0	150.265	10.114
						TCGA.A2.A0YL.01	brca	0.6407	103.788	4.805
						TCGA.A2.A0YM.01	brca	86.2879	872.303	13.2524
						TCGA.A2.A0YT.01	brca	0.2697	86.8451	7.8215
						TCGA.A2.A1FV.01	brca	0	12.7825	11.5651
						TCGA.A2.A1FW.01	brca	1.1869	72.9916	9.7916
						TCGA.A2.A1FX.01	brca	0.5416	12.4568	5.1452
						TCGA.A2.A1FZ.01	brca	0.8275	22.3417	3.3099
						TCGA.A2.A1G0.01	brca	0.3287	20.0526	5.9172
						TCGA.A2.A1G1.01	brca	64.8753	1508.62	340.87
						TCGA.A2.A1G4.01	brca	0	4.6591	9.3183
						TCGA.A2.A1G6.01	brca	0	75.3836	7.0047
						TCGA.A2.A259.01	brca	0.6221	39.1925	6.5321
						TCGA.A2.A25A.01	brca	0	114.357	5.6612
						TCGA.A2.A25B.01	brca	6.2018	26.53	12.0591
						TCGA.A2.A25C.01	brca	5.0728	5.7345	6.1756
						TCGA.A2.A25D.01	brca	0	27.0373	12.1858
						TCGA.A2.A25E.01	brca	0.3145	45.9119	6.2893
						TCGA.A2.A25F.01	brca	9.0136	80.0927	52.0216
						TCGA.A2.A3KC.01	brca	0.7101	64.2642	3.5505
						TCGA.A2.A3KD.01	brca	0.2965	29.3512	3.8542
						TCGA.A2.A3XS.01	brca	17.7282	26.9206	453.382
						TCGA.A2.A3XT.01	brca	0	44.738	17.0004
						TCGA.A2.A3XU.01	brca	2.7773	52.7689	23.012
						TCGA.A2.A3XV.01	brca	24.5161	7.3118	5.1613
						TCGA.A2.A3XW.01	brca	0.7087	41.1056	3.8979
						TCGA.A2.A3XX.01	brca	20.9065	160.055	26.3902
						TCGA.A2.A3XY.01	brca	3.9491	30.8028	8.688
						TCGA.A2.A3XZ.01	brca	5.858	36.5265	12.0606
						TCGA.A2.A3Y0.01	brca	14.7759	180.595	82.4167
						TCGA.A2.A4RW.01	brca	0.6053	38.1356	7.8692
						TCGA.A2.A4RX.01	brca	8.1916	156.27	19.5337
						TCGA.A2.A4RY.01	brca	0	52.6575	3.4449
						TCGA.A2.A4S0.01	brca	0	0.5217	6.2606
						TCGA.A2.A4S1.01	brca	11.9119	70.6203	101.251
						TCGA.A2.A4S2.01	brca	0.9849	61.0612	10.8334
						TCGA.A2.A4S3.01	brca	38.1926	45.7235	7.5309
						TCGA.A7.A0CD.01	brca	1.4543	14.5433	4.9447
						TCGA.A7.A0CE.01	brca	1.017	74.9216	23.0528
						TCGA.A7.A0CG.01	brca	0	36.1068	11.3815
						TCGA.A7.A0CH.01	brca	1.3084	50.591	4.3613
						TCGA.A7.A0CJ.01	brca	0.7548	52.0804	8.6801
						TCGA.A7.A0D9.01	brca	11.9391	36.2289	35.4055
						TCGA.A7.A0DA.01	brca	48.8621	86.6801	98.0589
						TCGA.A7.A0DB.01	brca	2.6822	19.9253	7.6636
						TCGA.A7.A13D.01	brca	37.3718	349.751	90.9922
						TCGA.A7.A13E.01	brca	5.1244	20.9245	8.1136
						TCGA.A7.A13F.01	brca	0.8032	12.0482	3.6145
						TCGA.A7.A13G.01	brca	0.5381	10.7621	10.7621
						TCGA.A7.A13H.01	brca	1.0411	64.2004	14.5752
						TCGA.A7.A26E.01	brca	1.5928	11.9458	3.1856
						TCGA.A7.A26F.01	brca	102.087	333.453	125.224
						TCGA.A7.A26G.01	brca	11.7732	203.703	17.7967
						TCGA.A7.A26H.01	brca	126.893	11.7493	9.6606
						TCGA.A7.A26I.01	brca	24.343	397.51	5.8091
						TCGA.A7.A26J.01	brca	0.5629	59.3906	8.4442
						TCGA.A7.A2KD.01	brca	0.5338	9.8752	6.9393
						TCGA.A7.A3IY.01	brca	4.5409	59.0317	5.2395
						TCGA.A7.A3IZ.01	brca	0	8.4602	3.7225
						TCGA.A7.A3J0.01	brca	6.4549	113.607	109.218
						TCGA.A7.A3J1.01	brca	0.2594	19.9724	7.7815
						TCGA.A7.A3RF.01	brca	0	7.8238	5.7828
						TCGA.A7.A425.01	brca	2.5117	47.7216	2.8705
						TCGA.A7.A426.01	brca	0.5546	61.8414	3.3278
						TCGA.A7.A4SA.01	brca	5.5165	19.3077	7.7231
						TCGA.A7.A4SB.01	brca	0	22.3741	9.7528
						TCGA.A7.A4SC.01	brca	1.1526	25.933	8.068
						TCGA.A7.A4SD.01	brca	1100.5	712.935	447.761
						TCGA.A7.A4SE.01	brca	12.318	1032.36	371.886
						TCGA.A7.A4SF.01	brca	2.7877	2.2301	7.248
						TCGA.A7.A56D.01	brca	3.3378	62.0828	4.6729
						TCGA.A7.A5ZV.01	brca	88.0862	19.0114	95.6907
						TCGA.A7.A5ZW.01	brca	0.8934	31.2674	8.0402
						TCGA.A7.A5ZX.01	brca	0	21.2788	4.9105
						TCGA.A7.A6VV.01	brca	39.5855	313.323	287.181
						TCGA.A7.A6VW.01	brca	1.847	495.456	139.448
						TCGA.A7.A6VX.01	brca	2.574	17.1601	4.719
						TCGA.A7.A6VY.01	brca	4.8426	336.908	658.596
						TCGA.A8.A06N.01	brca	0	3.9009	8.0312
						TCGA.A8.A06O.01	brca	1.3597	5.099	8.1584
						TCGA.A8.A06P.01	brca	12.2274	45.6048	3.3047
						TCGA.A8.A06Q.01	brca	0	5.2356	5.7867
						TCGA.A8.A06R.01	brca	4.3372	48.7937	14.096
						TCGA.A8.A06T.01	brca	0.8011	29.3722	12.817
						TCGA.A8.A06U.01	brca	4.2785	236.095	10.1128
						TCGA.A8.A06X.01	brca	9.9354	20.3676	10.4322
						TCGA.A8.A06Y.01	brca	3.313	15.3225	12.0095
						TCGA.A8.A06Z.01	brca	0	8.3592	1.7732
						TCGA.A8.A075.01	brca	5.0197	128.003	16.1348
						TCGA.A8.A076.01	brca	35.5861	59.2105	6.5789
						TCGA.A8.A079.01	brca	3.0496	5.0826	4.4049
						TCGA.A8.A07B.01	brca	0.8453	26.2046	18.5968
						TCGA.A8.A07C.01	brca	1.0638	260.638	23.4043
						TCGA.A8.A07E.01	brca	1.4327	154.728	6.3037
						TCGA.A8.A07F.01	brca	0	12.4241	7.4545
						TCGA.A8.A07G.01	brca	12.706	20.9478	5.8379
						TCGA.A8.A07I.01	brca	12.788	45.8604	8.8193
						TCGA.A8.A07J.01	brca	2.3002	26.682	5.5204
						TCGA.A8.A07L.01	brca	2.3989	293.009	3.427
						TCGA.A8.A07O.01	brca	18.5407	446.77	830.742
						TCGA.A8.A07P.01	brca	1.3822	11.0574	8.6386
						TCGA.A8.A07R.01	brca	1375.45	712.185	782.413
						TCGA.A8.A07S.01	brca	3.347	8.7022	5.3552
						TCGA.A8.A07U.01	brca	25.1953	1841.26	94.3824
						TCGA.A8.A07W.01	brca	23.1985	254.866	4.1312
						TCGA.A8.A07Z.01	brca	1.9652	18.1785	5.4044
						TCGA.A8.A081.01	brca	130.559	10.4031	15.8648
						TCGA.A8.A082.01	brca	1.6	113.2	2.4
						TCGA.A8.A083.01	brca	0.5195	2.5974	2.3377
						TCGA.A8.A084.01	brca	5.0276	16.6296	3.0939
						TCGA.A8.A085.01	brca	18.1357	59.2431	8.4633
						TCGA.A8.A086.01	brca	0.625	27.1896	3.7503
						TCGA.A8.A08A.01	brca	2.1709	9.769	2.5327
						TCGA.A8.A08B.01	brca	0	34.4523	3.5336
						TCGA.A8.A08C.01	brca	8.466	3.725	4.0637
						TCGA.A8.A08F.01	brca	6.8006	79.4815	14.8762
						TCGA.A8.A08G.01	brca	5.5132	23.5038	8.7051
						TCGA.A8.A08H.01	brca	4.4548	128.299	50.3397
						TCGA.A8.A08I.01	brca	2.8677	16.7649	40.3682
						TCGA.A8.A08J.01	brca	463.406	40.2528	10.3127
						TCGA.A8.A08L.01	brca	2.5381	50.1269	5.3934
						TCGA.A8.A08O.01	brca	0	21.6599	5.415
						TCGA.A8.A08P.01	brca	0	33.3735	18.8983
						TCGA.A8.A08R.01	brca	7.6499	1455.94	40.6977
						TCGA.A8.A08S.01	brca	3.2258	9.0323	2.5806
						TCGA.A8.A08T.01	brca	7.6539	9.6506	3.9933
						TCGA.A8.A08X.01	brca	9.0084	60.6566	39.637
						TCGA.A8.A08Z.01	brca	29.6997	25.7833	6.201
						TCGA.A8.A090.01	brca	5.2716	36.5245	10.5432
						TCGA.A8.A091.01	brca	0	19.0942	5.6304
						TCGA.A8.A092.01	brca	4.4138	15.8897	4.7081
						TCGA.A8.A093.01	brca	4.9084	7.199	1.9634
						TCGA.A8.A094.01	brca	3.123	53.0918	21.2367
						TCGA.A8.A095.01	brca	2.7407	13.0185	7.537
						TCGA.A8.A096.01	brca	5.8516	63.3229	10.2403
						TCGA.A8.A097.01	brca	29.6146	160.843	13.313
						TCGA.A8.A099.01	brca	9.8483	19.1642	6.3881
						TCGA.A8.A09A.01	brca	102.401	38.0607	10.4214
						TCGA.A8.A09B.01	brca	6.9661	12.1906	3.483
						TCGA.A8.A09C.01	brca	38.1904	4.9969	2.4984
						TCGA.A8.A09D.01	brca	20.4491	55.7338	8.4202
						TCGA.A8.A09E.01	brca	2.7127	7.363	6.2004
						TCGA.A8.A09G.01	brca	0.9183	8.2645	9.1827
						TCGA.A8.A09I.01	brca	5.4065	39.4473	11.4137
						TCGA.A8.A09K.01	brca	0	9.2798	8.4361
						TCGA.A8.A09M.01	brca	0.3557	18.1382	9.9582
						TCGA.A8.A09N.01	brca	0.8728	3.0548	3.4912
						TCGA.A8.A09Q.01	brca	3046.78	15.7017	12.7576
						TCGA.A8.A09R.01	brca	37.9993	86.362	8.6362
						TCGA.A8.A09T.01	brca	0.7862	14.1509	2.3585
						TCGA.A8.A09V.01	brca	0	5.774	5.774
						TCGA.A8.A09W.01	brca	5.032	9.2253	8.806
						TCGA.A8.A09X.01	brca	0.414	6.2093	18.2138
						TCGA.A8.A09Z.01	brca	3.9258	8.5653	10.3498
						TCGA.A8.A0A1.01	brca	27.1084	51.7068	19.0763
						TCGA.A8.A0A2.01	brca	7.0796	29.7935	9.1445
						TCGA.A8.A0A4.01	brca	0.8705	78.3442	16.1041
						TCGA.A8.A0A6.01	brca	1.064	49.4747	12.7677
						TCGA.A8.A0A7.01	brca	23.1645	32.5874	30.2316
						TCGA.A8.A0A9.01	brca	4.3937	18.1605	6.737
						TCGA.A8.A0AB.01	brca	1.2889	9.022	3.8666
						TCGA.A8.A0AD.01	brca	9.5861	55.7734	3.9216
						TCGA.AC.A23C.01	brca	8.4223	21.6574	7.5199
						TCGA.AC.A23E.01	brca	5.5029	33.0174	5.5029
						TCGA.AC.A23G.01	brca	6.5407	141.715	5.814
						TCGA.AC.A23H.01	brca	187.161	68.1396	2.3804
						TCGA.AC.A2B8.01	brca	3.7793	31.4941	8.5664
						TCGA.AC.A2BK.01	brca	10.873	1825.07	15.67
						TCGA.AC.A2BM.01	brca	1.725	4.4851	8.2801
						TCGA.AC.A2FB.01	brca	0	57.379	13.2912
						TCGA.AC.A2FE.01	brca	0.6189	22.8978	7.7357
						TCGA.AC.A2FF.01	brca	0.3221	56.6828	9.3398
						TCGA.AC.A2FG.01	brca	0	76.9629	3.1096
						TCGA.AC.A2FK.01	brca	0	278.346	4.0018
						TCGA.AC.A2FM.01	brca	0	3.6752	5.3458
						TCGA.AC.A2FO.01	brca	0.3879	20.9465	11.249
						TCGA.AC.A2QH.01	brca	517.725	2085.74	419.621
						TCGA.AC.A2QI.01	brca	1.2708	64.8133	6.3542
						TCGA.AC.A2QJ.01	brca	773.928	178.508	108.045
						TCGA.AC.A3BB.01	brca	2.5337	31.1284	5.7913
						TCGA.AC.A3EH.01	brca	7.6019	92.2598	8.293
						TCGA.AC.A3HN.01	brca	2.6335	45.2963	9.4806
						TCGA.AC.A3OD.01	brca	1.2002	34.4069	11.2022
						TCGA.AC.A3QP.01	brca	0	32.8621	5.3496
						TCGA.AC.A3QQ.01	brca	1.995	27.4314	4.9875
						TCGA.AC.A3TM.01	brca	4.086	14.9819	3.178
						TCGA.AC.A3TN.01	brca	3.7495	15.748	1.1249
						TCGA.AC.A3W5.01	brca	38.6672	29.2061	7.4044
						TCGA.AC.A3W6.01	brca	1.2558	34.7426	4.1859
						TCGA.AC.A3W7.01	brca	8.3908	33.8628	4.1954
						TCGA.AC.A3YI.01	brca	0.9946	181.519	8.9516
						TCGA.AC.A3YJ.01	brca	0.9603	3.8411	7.6822
						TCGA.AC.A4ZE.01	brca	1.3451	7.7343	19.8403
						TCGA.AC.A5EH.01	brca	3.299	61.4433	5.3608
						TCGA.AC.A5XS.01	brca	0.4645	16.2591	8.3618
						TCGA.AC.A5XU.01	brca	3.888	10.8865	2.7216
						TCGA.AC.A62V.01	brca	5.4082	75.715	12.0645
						TCGA.AC.A62X.01	brca	0	83.689	185.698
						TCGA.AC.A62Y.01	brca	3.2963	24.3098	9.4767
						TCGA.AC.A6IV.01	brca	135.211	34.3392	12.5195
						TCGA.AC.A6IW.01	brca	0.6417	754.632	516.885
						TCGA.AC.A6IX.01	brca	0.7292	13.1255	5.8336
						TCGA.AC.A6IX.06	brca	0.2869	32.9915	14.0572
						TCGA.AC.A6NO.01	brca	1.5817	15.8165	5.1404
						TCGA.AC.A7VB.01	brca	0.5853	10.2429	5.8531
						TCGA.AC.A7VC.01	brca	2.4975	1053.33	244.758
						TCGA.AC.A8OP.01	brca	0.5177	33.6486	6.212
						TCGA.AC.A8OQ.01	brca	745.602	604.313	298.453
						TCGA.AC.A8OR.01	brca	0.9881	10.3755	4.9407
						TCGA.AC.A8OS.01	brca	0	23.705	10.0966
						TCGA.AN.A03X.01	brca	7.0164	29.9793	9.5679
						TCGA.AN.A03Y.01	brca	4.6445	7.1454	5.3591
						TCGA.AN.A041.01	brca	8.9641	336.653	3.6521
						TCGA.AN.A046.01	brca	6.8156	8.7088	6.8156
						TCGA.AN.A049.01	brca	0.8551	103.035	7.6956
						TCGA.AN.A04A.01	brca	66.8768	95.5882	10.1541
						TCGA.AN.A04C.01	brca	7.4481	10.9949	13.1229
						TCGA.AN.A04D.01	brca	0.2879	2.8794	6.9105
						TCGA.AN.A0AJ.01	brca	0.5981	12.2617	19.7383
						TCGA.AN.A0AK.01	brca	1.2594	16.3728	11.7548
						TCGA.AN.A0AL.01	brca	8.4541	464.573	24.9597
						TCGA.AN.A0AM.01	brca	4.8815	239.542	13.5984
						TCGA.AN.A0AR.01	brca	6.8524	680.552	4.3278
						TCGA.AN.A0AS.01	brca	20.2748	98.6709	9.011
						TCGA.AN.A0AT.01	brca	2.0179	902.277	84.7506
						TCGA.AN.A0FD.01	brca	3.2926	8.4666	3.7629
						TCGA.AN.A0FF.01	brca	0.3681	13.2511	7.3617
						TCGA.AN.A0FJ.01	brca	1.2005	1253.9	2253.9
						TCGA.AN.A0FK.01	brca	0.7444	14.8879	5.2108
						TCGA.AN.A0FL.01	brca	0	9.2123	9.673
						TCGA.AN.A0FN.01	brca	20.2291	62.7101	7.4173
						TCGA.AN.A0FS.01	brca	0	26.8431	2.2791
						TCGA.AN.A0FT.01	brca	4.5668	18.6823	7.4729
						TCGA.AN.A0FV.01	brca	20.3553	66.0586	7.2972
						TCGA.AN.A0FW.01	brca	6.2383	21.2102	6.2383
						TCGA.AN.A0FX.01	brca	12.7592	185.646	310.686
						TCGA.AN.A0FY.01	brca	3.5379	14.1516	10.6137
						TCGA.AN.A0FZ.01	brca	13.0834	23.3992	4.5289
						TCGA.AN.A0G0.01	brca	2.0517	842.09	5.8621
						TCGA.AN.A0XL.01	brca	0.7485	28.8186	6.3625
						TCGA.AN.A0XN.01	brca	35.3674	167.87	7.9701
						TCGA.AN.A0XO.01	brca	6.5383	28.7115	3.4113
						TCGA.AN.A0XP.01	brca	18.6495	25.7235	8.0386
						TCGA.AN.A0XR.01	brca	18.6027	10.7482	2.8938
						TCGA.AN.A0XS.01	brca	5.2309	16.3466	4.2501
						TCGA.AN.A0XT.01	brca	0	6.0397	4.7455
						TCGA.AN.A0XU.01	brca	4.1351	80.2895	460.028
						TCGA.AN.A0XV.01	brca	0	31.3808	9.4142
						TCGA.AN.A0XW.01	brca	4.6684	45.5164	16.7283
						TCGA.AO.A03L.01	brca	2.315	145.515	5.2915
						TCGA.AO.A03M.01	brca	0.8018	89.269	15.7691
						TCGA.AO.A03N.01	brca	5.0075	30.5458	4.5068
						TCGA.AO.A03O.01	brca	0.8734	18.3406	8.7336
						TCGA.AO.A03P.01	brca	1.3357	6.3444	5.6766
						TCGA.AO.A03R.01	brca	0.6677	27.3744	12.6857
						TCGA.AO.A03T.01	brca	0	43.7074	9.7699
						TCGA.AO.A03U.01	brca	0.9155	465.06	16.4785
						TCGA.AO.A03V.01	brca	1.5686	9.8039	4.3137
						TCGA.AO.A0J2.01	brca	2.8494	38.1821	3.7042
						TCGA.AO.A0J3.01	brca	0	2.7331	5.7146
						TCGA.AO.A0J4.01	brca	5.0985	881.524	104.264
						TCGA.AO.A0J5.01	brca	5.3266	12.0549	3.9249
						TCGA.AO.A0J6.01	brca	7.4041	1568.65	721.261
						TCGA.AO.A0J7.01	brca	0.358	7.1608	7.1608
						TCGA.AO.A0J8.01	brca	3.0062	33.0682	4.5093
						TCGA.AO.A0J9.01	brca	7.733	32.56	8.954
						TCGA.AO.A0JA.01	brca	1.4122	13.7688	13.0627
						TCGA.AO.A0JB.01	brca	1.368	60.1915	12.3119
						TCGA.AO.A0JC.01	brca	18.3888	71.366	75.3065
						TCGA.AO.A0JD.01	brca	5.6439	66.5977	46.2797
						TCGA.AO.A0JE.01	brca	4.0568	32.4544	31.643
						TCGA.AO.A0JF.01	brca	4.2275	78.7855	21.5219
						TCGA.AO.A0JG.01	brca	0.306	28.1518	7.6499
						TCGA.AO.A0JI.01	brca	0	3.0292	7.9515
						TCGA.AO.A0JJ.01	brca	0	27.0076	14.0439
						TCGA.AO.A0JL.01	brca	9.7812	46.4607	15.2831
						TCGA.AO.A0JM.01	brca	19.6078	43.0283	2.1786
						TCGA.AO.A124.01	brca	37.7926	203.851	1288.96
						TCGA.AO.A125.01	brca	0.7569	1.8922	12.8671
						TCGA.AO.A126.01	brca	1.1841	48.9441	5.526
						TCGA.AO.A128.01	brca	5.4274	85.4817	46.6757
						TCGA.AO.A129.01	brca	7.722	619.305	16.2162
						TCGA.AO.A12A.01	brca	11.9413	33.4357	4.0942
						TCGA.AO.A12B.01	brca	0.4229	1.6915	8.0347
						TCGA.AO.A12C.01	brca	10.5536	31.6607	4.6436
						TCGA.AO.A12D.01	brca	4.806	24.5104	23.0686
						TCGA.AO.A12E.01	brca	0	56.8306	4.0984
						TCGA.AO.A12F.01	brca	1.0208	17.6946	13.6112
						TCGA.AO.A12G.01	brca	0.4	19.2	8.8
						TCGA.AO.A12H.01	brca	0	2.961	7.567
						TCGA.AO.A1KO.01	brca	0	552.024	8.364
						TCGA.AO.A1KP.01	brca	1.9894	9.284	19.5626
						TCGA.AO.A1KQ.01	brca	6.3422	48.2986	13.1723
						TCGA.AO.A1KR.01	brca	0	1929.77	16.0535
						TCGA.AO.A1KS.01	brca	0	14.5418	12.8894
						TCGA.AO.A1KT.01	brca	6.3139	20.1443	6.3139
						TCGA.AQ.A04H.01	brca	0	29.9736	9.4035
						TCGA.AQ.A04J.01	brca	14.9159	125.357	52.047
						TCGA.AQ.A04L.01	brca	0.4134	25.2196	128.992
						TCGA.AQ.A0Y5.01	brca	3.8832	196.276	9.1784
						TCGA.AQ.A1H2.01	brca	0.7526	3.7632	6.5228
						TCGA.AQ.A1H3.01	brca	1.1218	33.3726	4.7675
						TCGA.AQ.A54N.01	brca	0	703.406	8.203
						TCGA.AQ.A54O.01	brca	1.6639	7.7648	12.7565
						TCGA.AQ.A7U7.01	brca	0	28.8902	11.3218
						TCGA.AR.A0TP.01	brca	1.8103	117.668	16.2925
						TCGA.AR.A0TQ.01	brca	5.7471	35.3038	10.1259
						TCGA.AR.A0TR.01	brca	0.2747	4.1198	3.0212
						TCGA.AR.A0TS.01	brca	32.7439	241.323	369.352
						TCGA.AR.A0TT.01	brca	7.7488	24.062	21.2072
						TCGA.AR.A0TU.01	brca	0.313	155.267	6.5738
						TCGA.AR.A0TV.01	brca	0	8.7488	10.8485
						TCGA.AR.A0TW.01	brca	1.3137	7.8824	8.5393
						TCGA.AR.A0TX.01	brca	0.3384	39.5939	10.1523
						TCGA.AR.A0TY.01	brca	0.3225	19.6711	6.1271
						TCGA.AR.A0TZ.01	brca	2.3929	19.6219	6.2216
						TCGA.AR.A0U0.01	brca	1.9569	960.861	215.264
						TCGA.AR.A0U2.01	brca	4.6515	53.6476	16.4354
						TCGA.AR.A0U3.01	brca	1.1409	19.3953	7.9863
						TCGA.AR.A0U4.01	brca	19.5809	32.9784	6.527
						TCGA.AR.A1AH.01	brca	0.3354	340.743	15.4273
						TCGA.AR.A1AI.01	brca	20.0817	1911.5	20.7624
						TCGA.AR.A1AJ.01	brca	1.1603	1078.69	41.3839
						TCGA.AR.A1AK.01	brca	1.5817	41.5184	6.3266
						TCGA.AR.A1AL.01	brca	0.3192	51.7118	4.4689
						TCGA.AR.A1AM.01	brca	0.3534	35.6965	6.3618
						TCGA.AR.A1AN.01	brca	5.5402	60.2498	7.6178
						TCGA.AR.A1AO.01	brca	6.5708	220.123	45.6674
						TCGA.AR.A1AP.01	brca	3.5987	18.4435	8.0972
						TCGA.AR.A1AQ.01	brca	10.3306	28.4091	28.9256
						TCGA.AR.A1AR.01	brca	11.1221	380.128	22.2442
						TCGA.AR.A1AS.01	brca	3.1517	28.8158	8.5547
						TCGA.AR.A1AT.01	brca	1.0368	12.4417	4.6656
						TCGA.AR.A1AU.01	brca	0.7529	30.1145	3.0115
						TCGA.AR.A1AV.01	brca	5.4943	33.2551	4.6268
						TCGA.AR.A1AW.01	brca	3.7836	21.5664	86.2656
						TCGA.AR.A1AX.01	brca	5.293	48.7713	18.9036
						TCGA.AR.A1AY.01	brca	7.7156	164.967	645.173
						TCGA.AR.A24H.01	brca	2.7998	69.0621	9.3327
						TCGA.AR.A24K.01	brca	1.7637	7.3486	4.7031
						TCGA.AR.A24L.01	brca	3.134	39.9582	16.1922
						TCGA.AR.A24M.01	brca	2.2832	43.38	3.0442
						TCGA.AR.A24N.01	brca	4.0972	4.6825	8.1943
						TCGA.AR.A24O.01	brca	6.11	51.5954	5.0916
						TCGA.AR.A24P.01	brca	10.1258	34.4279	4.629
						TCGA.AR.A24Q.01	brca	1.4556	744.396	19.7962
						TCGA.AR.A24R.01	brca	4.374	10.6616	7.3811
						TCGA.AR.A24S.01	brca	6.4486	34.8812	11.7248
						TCGA.AR.A24T.01	brca	1.2883	25.4449	7.0859
						TCGA.AR.A24U.01	brca	11.2548	38.3987	17.8752
						TCGA.AR.A24V.01	brca	0.6091	116.035	11.2685
						TCGA.AR.A24W.01	brca	0.3672	78.5898	7.7121
						TCGA.AR.A24X.01	brca	2.4559	13.2618	4.9118
						TCGA.AR.A24Z.01	brca	4.1204	23.349	6.8673
						TCGA.AR.A250.01	brca	5.7947	42.2185	14.6247
						TCGA.AR.A251.01	brca	19.9289	126.837	88.4694
						TCGA.AR.A252.01	brca	13.6296	33.7778	23.1111
						TCGA.AR.A254.01	brca	2.6157	156.071	19.7631
						TCGA.AR.A255.01	brca	1.2415	17.3805	15.8287
						TCGA.AR.A256.01	brca	5.9176	563.355	15.9775
						TCGA.AR.A2LE.01	brca	6.487	42.4152	11.477
						TCGA.AR.A2LH.01	brca	1.0515	76.2355	9.9895
						TCGA.AR.A2LJ.01	brca	0	33.9451	5.0918
						TCGA.AR.A2LK.01	brca	19.1278	7.2868	4.8579
						TCGA.AR.A2LL.01	brca	0.722	5.4152	8.6643
						TCGA.AR.A2LM.01	brca	0.913	35.6083	1.8261
						TCGA.AR.A2LN.01	brca	0	36.7126	8.9
						TCGA.AR.A2LO.01	brca	1.5408	85.2594	7.1905
						TCGA.AR.A2LQ.01	brca	0.936	40.7179	7.9564
						TCGA.AR.A2LR.01	brca	36.8992	346.173	280.628
						TCGA.AR.A5QM.01	brca	1.3355	18.2524	4.0066
						TCGA.AR.A5QN.01	brca	1.5147	28.7792	5.7558
						TCGA.AR.A5QP.01	brca	0.401	68.9655	4.4106
						TCGA.AR.A5QQ.01	brca	2.9806	1458.02	121.212
						TCGA.B6.A0I1.01	brca	4.5263	28.7747	168.768
						TCGA.B6.A0I2.01	brca	0	1200	26.6065
						TCGA.B6.A0I5.01	brca	8.3992	27.4372	4.4795
						TCGA.B6.A0I6.01	brca	8.2806	75.9057	86.4865
						TCGA.B6.A0I8.01	brca	0.9383	9.3831	4.066
						TCGA.B6.A0I9.01	brca	2.2307	15.9337	26.1313
						TCGA.B6.A0IA.01	brca	0.7663	7.6628	2.2989
						TCGA.B6.A0IB.01	brca	0.3232	4.2017	4.8481
						TCGA.B6.A0IC.01	brca	0.2402	1.6815	5.2847
						TCGA.B6.A0IE.01	brca	7.0659	14.4684	5.3836
						TCGA.B6.A0IG.01	brca	0.3073	12.9072	14.1364
						TCGA.B6.A0IH.01	brca	0	33.7846	8.4462
						TCGA.B6.A0IJ.01	brca	0.5606	1297.18	14.575
						TCGA.B6.A0IK.01	brca	104.624	100.578	34.104
						TCGA.B6.A0IM.01	brca	12.5046	50.2843	5.5871
						TCGA.B6.A0IN.01	brca	7.5445	8.016	8.016
						TCGA.B6.A0IO.01	brca	0	12.83	6.2505
						TCGA.B6.A0IP.01	brca	3.0812	52.38	3.0812
						TCGA.B6.A0IQ.01	brca	1.4997	55.1898	2.3996
						TCGA.B6.A0RE.01	brca	5.0159	170.155	163.982
						TCGA.B6.A0RG.01	brca	5.5896	46.749	38.6188
						TCGA.B6.A0RH.01	brca	2.0633	15.4746	4.8143
						TCGA.B6.A0RI.01	brca	7.7394	60.9481	10.6417
						TCGA.B6.A0RL.01	brca	0.6154	0.9231	7.0769
						TCGA.B6.A0RM.01	brca	0	4.5245	2.7843
						TCGA.B6.A0RN.01	brca	2.0562	6.5798	3.7011
						TCGA.B6.A0RO.01	brca	0	6.2804	3.8879
						TCGA.B6.A0RP.01	brca	6.9224	18.4598	4.6149
						TCGA.B6.A0RQ.01	brca	0	156.651	0.3096
						TCGA.B6.A0RS.01	brca	6.3131	15.1515	7.8914
						TCGA.B6.A0RT.01	brca	2.2254	544.905	782.706
						TCGA.B6.A0RU.01	brca	0.7096	48.256	309.761
						TCGA.B6.A0RV.01	brca	0	21.7742	6.4516
						TCGA.B6.A0WS.01	brca	1.3703	16.1014	6.1665
						TCGA.B6.A0WT.01	brca	4.3505	24.2387	2.486
						TCGA.B6.A0WV.01	brca	7.6473	11.6959	7.6473
						TCGA.B6.A0WW.01	brca	2.8393	34.6394	9.0857
						TCGA.B6.A0WX.01	brca	3.4131	551.78	37.5438
						TCGA.B6.A0WY.01	brca	0.9603	25.6082	4.8015
						TCGA.B6.A0WZ.01	brca	1.0859	19.1838	2.1717
						TCGA.B6.A0X0.01	brca	2.4155	5.4348	2.4155
						TCGA.B6.A0X1.01	brca	0	389.183	81.5328
						TCGA.B6.A0X4.01	brca	0	7.0838	7.6741
						TCGA.B6.A0X5.01	brca	4.2066	0.9348	11.2176
						TCGA.B6.A0X7.01	brca	2.0597	41.1946	6.1792
						TCGA.B6.A1KC.01	brca	0.6447	2.579	6.7698
						TCGA.B6.A1KF.01	brca	1.8942	66.2957	12.3121
						TCGA.B6.A1KI.01	brca	2.6408	12.0305	5.8685
						TCGA.B6.A1KN.01	brca	18.362	28.5631	3.789
						TCGA.B6.A2IU.01	brca	0	14.3781	2.1567
						TCGA.B6.A3ZX.01	brca	1.9797	125.382	29.6956
						TCGA.B6.A400.01	brca	35.4267	1492.02	175.963
						TCGA.B6.A401.01	brca	6.1581	22.2374	4.7896
						TCGA.B6.A402.01	brca	21.5974	1355.75	4.4825
						TCGA.B6.A408.01	brca	0	15.7839	10.8734
						TCGA.B6.A409.01	brca	1.2719	352.305	5.7234
						TCGA.B6.A40B.01	brca	8.9587	23.6764	4.4793
						TCGA.B6.A40C.01	brca	1.6463	24.9691	2.7439
						TCGA.BH.A0AU.01	brca	2.7076	23.0144	12.6354
						TCGA.BH.A0AV.01	brca	464.07	276.696	1056.41
						TCGA.BH.A0AW.01	brca	14.1483	41.8789	36.2196
						TCGA.BH.A0AY.01	brca	6.0843	8.2573	5.6497
						TCGA.BH.A0AZ.01	brca	8.1457	49.8323	8.1457
						TCGA.BH.A0B0.01	brca	8.261	56.5882	7.4349
						TCGA.BH.A0B1.01	brca	5.9613	55.8867	27.9434
						TCGA.BH.A0B3.01	brca	7.2944	735.579	193.877
						TCGA.BH.A0B4.01	brca	1.2814	33.9567	4.4849
						TCGA.BH.A0B5.01	brca	3.3356	21.6811	3.3356
						TCGA.BH.A0B6.01	brca	0.795	47.7019	10.7329
						TCGA.BH.A0B7.01	brca	4.6462	185.132	11.4367
						TCGA.BH.A0B8.01	brca	6.4284	30.7644	36.7336
						TCGA.BH.A0B9.01	brca	4.2544	1152.49	25.0784
						TCGA.BH.A0BA.01	brca	1.0282	21.2493	6.1691
						TCGA.BH.A0BC.01	brca	0	17.8141	5.1329
						TCGA.BH.A0BD.01	brca	1.9621	88.62	6.2132
						TCGA.BH.A0BF.01	brca	0	32.3606	31.2049
						TCGA.BH.A0BG.01	brca	2.1999	870.535	11.6281
						TCGA.BH.A0BJ.01	brca	0.3586	23.6708	5.0211
						TCGA.BH.A0BL.01	brca	9.1187	909.743	27.6601
						TCGA.BH.A0BM.01	brca	0.6369	67.5159	9.5541
						TCGA.BH.A0BO.01	brca	0	56.5302	3.2489
						TCGA.BH.A0BP.01	brca	3.009	9.0271	5.015
						TCGA.BH.A0BQ.01	brca	0.4667	40.599	3.7332
						TCGA.BH.A0BR.01	brca	3.4335	23.176	12.4464
						TCGA.BH.A0BS.01	brca	0.3237	8.4156	3.5605
						TCGA.BH.A0BT.01	brca	3.4513	27.9937	9.5869
						TCGA.BH.A0BV.01	brca	3.0698	7.6746	0.7675
						TCGA.BH.A0BW.01	brca	20.2653	1001.84	51.5844
						TCGA.BH.A0BZ.01	brca	5.1325	50.4189	11.7745
						TCGA.BH.A0C0.01	brca	7.7661	54.8196	52.9922
						TCGA.BH.A0C1.01	brca	6.5947	49.4601	8.2433
						TCGA.BH.A0C3.01	brca	1.692	37.225	8.4602
						TCGA.BH.A0C7.01	brca	3.126	12.2436	6.5125
						TCGA.BH.A0DD.01	brca	3.8515	66.8768	10.8543
						TCGA.BH.A0DE.01	brca	6.7871	106.597	7.9848
						TCGA.BH.A0DG.01	brca	9.1719	41.2736	7.5043
						TCGA.BH.A0DH.01	brca	0.3764	11.6673	4.14
						TCGA.BH.A0DI.01	brca	0.8299	60.9991	9.5441
						TCGA.BH.A0DK.01	brca	12.1512	52.2052	38.7039
						TCGA.BH.A0DL.01	brca	0.6177	27.1773	12.6621
						TCGA.BH.A0DO.01	brca	1.0957	29.9489	2.1914
						TCGA.BH.A0DP.01	brca	1.2859	55.7222	5.5722
						TCGA.BH.A0DQ.01	brca	3.678	26.9718	5.3126
						TCGA.BH.A0DS.01	brca	2.8805	24.964	7.6812
						TCGA.BH.A0DT.01	brca	0	29.7963	5.0305
						TCGA.BH.A0DV.01	brca	0.2976	44.3419	2.3808
						TCGA.BH.A0DX.01	brca	5.5824	65.5006	7.0711
						TCGA.BH.A0DZ.01	brca	16.1017	46.6102	11.8644
						TCGA.BH.A0E0.01	brca	3.6563	11.5783	9.7502
						TCGA.BH.A0E1.01	brca	0.3959	19.0046	2.3756
						TCGA.BH.A0E2.01	brca	7.4568	61.2245	40.0314
						TCGA.BH.A0E6.01	brca	0.4673	46.729	10.2804
						TCGA.BH.A0E7.01	brca	2.3019	30.4996	1.4387
						TCGA.BH.A0E9.01	brca	1.0617	29.0188	3.8928
						TCGA.BH.A0EA.01	brca	13.3987	39.7177	3.8282
						TCGA.BH.A0EB.01	brca	1.9756	21.4027	6.2562
						TCGA.BH.A0EE.01	brca	5.3556	930.879	12.7197
						TCGA.BH.A0EI.01	brca	1.1587	100.811	3.4762
						TCGA.BH.A0GY.01	brca	8.1154	97.8359	35.6177
						TCGA.BH.A0GZ.01	brca	4.3134	38.8208	29.7147
						TCGA.BH.A0H0.01	brca	0	1.0765	5.6516
						TCGA.BH.A0H3.01	brca	2.9042	36.7861	5.163
						TCGA.BH.A0H5.01	brca	1.129	46.6633	15.8053
						TCGA.BH.A0H6.01	brca	2.8386	30.0081	7.7048
						TCGA.BH.A0H7.01	brca	6.2377	99.1464	4.2679
						TCGA.BH.A0H9.01	brca	0.391	14.8568	2.3458
						TCGA.BH.A0HA.01	brca	2.7833	29.2242	6.0304
						TCGA.BH.A0HB.01	brca	14.3472	62.1712	52.6064
						TCGA.BH.A0HF.01	brca	21.4685	233.023	152.963
						TCGA.BH.A0HI.01	brca	4.5714	22.5055	3.1648
						TCGA.BH.A0HK.01	brca	8.4299	100.632	79.0306
						TCGA.BH.A0HL.01	brca	2.4017	7.5053	6.6046
						TCGA.BH.A0HN.01	brca	0	2.4474	4.8948
						TCGA.BH.A0HO.01	brca	0.2828	5.3733	5.9389
						TCGA.BH.A0HP.01	brca	0.9656	22.8516	8.3682
						TCGA.BH.A0HQ.01	brca	1.3496	26.5425	3.599
						TCGA.BH.A0HU.01	brca	1.3442	8.4013	4.7047
						TCGA.BH.A0HW.01	brca	0.5935	15.1352	8.6063
						TCGA.BH.A0HX.01	brca	11.8197	72.443	31.6462
						TCGA.BH.A0HY.01	brca	11.3971	27.2059	3.6765
						TCGA.BH.A0RX.01	brca	1.9114	63.5527	22.9363
						TCGA.BH.A0W3.01	brca	1.3175	0.4392	0.4392
						TCGA.BH.A0W4.01	brca	2.5619	31.3831	3.5226
						TCGA.BH.A0W5.01	brca	3.4713	21.5221	10.761
						TCGA.BH.A0W7.01	brca	2.8762	20.9549	9.8611
						TCGA.BH.A0WA.01	brca	1.3683	662.951	546.986
						TCGA.BH.A18F.01	brca	0.7846	13.7309	2.3539
						TCGA.BH.A18G.01	brca	0	45	5
						TCGA.BH.A18H.01	brca	0	16.5631	12.4224
						TCGA.BH.A18I.01	brca	5.3426	68.6523	5.6097
						TCGA.BH.A18J.01	brca	1.7473	40.8873	5.9409
						TCGA.BH.A18K.01	brca	4.6038	38.247	7.7911
						TCGA.BH.A18L.01	brca	0.289	4.3353	4.3353
						TCGA.BH.A18M.01	brca	1.1019	17.9983	4.4077
						TCGA.BH.A18N.01	brca	0.3432	7.2066	3.4317
						TCGA.BH.A18P.01	brca	13.9156	25.634	4.7606
						TCGA.BH.A18Q.01	brca	9.7427	721.381	458.329
						TCGA.BH.A18R.01	brca	42.1991	18.1278	17.8306
						TCGA.BH.A18S.01	brca	0	0.9798	6.5318
						TCGA.BH.A18T.01	brca	1.1972	8.6794	6.5844
						TCGA.BH.A18U.01	brca	1.7587	22.1597	12.3109
						TCGA.BH.A18V.01	brca	184.274	1462.92	773.552
						TCGA.BH.A18V.06	brca	36.876	691.353	803.433
						TCGA.BH.A1EN.01	brca	0.6351	36.517	11.1139
						TCGA.BH.A1EO.01	brca	2.2889	65.8059	10.8723
						TCGA.BH.A1ES.01	brca	18.0328	63.1148	5.7377
						TCGA.BH.A1ES.06	brca	6.1195	56.8754	6.8395
						TCGA.BH.A1ET.01	brca	0.4305	13.347	7.7499
						TCGA.BH.A1EU.01	brca	0.2065	51.6156	14.0394
						TCGA.BH.A1EV.01	brca	9.7021	27.5541	6.9855
						TCGA.BH.A1EW.01	brca	0.7189	31.6319	7.5485
						TCGA.BH.A1EX.01	brca	19.8312	32.5798	12.2765
						TCGA.BH.A1EY.01	brca	4.3884	97.5202	10.7272
						TCGA.BH.A1F0.01	brca	8.6031	738.144	574.9
						TCGA.BH.A1F2.01	brca	69.0925	65.7296	7.3373
						TCGA.BH.A1F5.01	brca	0.7369	26.5291	9.2115
						TCGA.BH.A1F6.01	brca	4.2433	58.463	150.872
						TCGA.BH.A1F8.01	brca	2.3148	16.7824	8.1019
						TCGA.BH.A1FB.01	brca	0.587	130.32	9.6859
						TCGA.BH.A1FC.01	brca	4.7076	1103.05	337.477
						TCGA.BH.A1FD.01	brca	5.5104	8.7007	10.4408
						TCGA.BH.A1FE.01	brca	0.808	40.132	11.3124
						TCGA.BH.A1FE.06	brca	2.109	224.605	12.3023
						TCGA.BH.A1FG.01	brca	7.2833	8.3758	7.6475
						TCGA.BH.A1FH.01	brca	1.8577	32.8199	4.9539
						TCGA.BH.A1FJ.01	brca	0.8181	5.181	4.3629
						TCGA.BH.A1FL.01	brca	1.0834	6.7713	3.2502
						TCGA.BH.A1FM.01	brca	6.1622	96.4205	7.9746
						TCGA.BH.A1FN.01	brca	0.9725	130.31	7.2935
						TCGA.BH.A1FR.01	brca	0	8.3211	7.3421
						TCGA.BH.A1FU.01	brca	11.6934	61.0654	4.764
						TCGA.BH.A201.01	brca	3.6824	122.44	4.2961
						TCGA.BH.A202.01	brca	3.6516	19.3011	13.5629
						TCGA.BH.A203.01	brca	12.9055	31.9054	6.4528
						TCGA.BH.A204.01	brca	0.908	13.1654	8.6256
						TCGA.BH.A208.01	brca	2.1789	94.5637	6.1009
						TCGA.BH.A209.01	brca	1.1838	30.1864	27.227
						TCGA.BH.A28O.01	brca	0	117.311	5.1484
						TCGA.BH.A28Q.01	brca	0.2525	5.8073	6.8173
						TCGA.BH.A2L8.01	brca	2.5126	22.2546	5.0252
						TCGA.BH.A42T.01	brca	3.187	10.5171	4.7805
						TCGA.BH.A42U.01	brca	0.3604	112.077	7.5679
						TCGA.BH.A42V.01	brca	0.8732	84.1217	6.1126
						TCGA.BH.A5IZ.01	brca	1.6653	1409.66	328.061
						TCGA.BH.A5J0.01	brca	2.7804	21.316	7.8777
						TCGA.BH.A6R8.01	brca	1.0349	17.5938	4.8297
						TCGA.BH.A6R9.01	brca	2.443	595.684	26.873
						TCGA.BH.A8FY.01	brca	0.5547	6.1018	4.9924
						TCGA.BH.A8FZ.01	brca	0.42	66.3656	7.1406
						TCGA.BH.A8G0.01	brca	2.878	69.0711	7.1949
						TCGA.BH.AB28.01	brca	0.7971	10.3627	5.5799
						TCGA.C8.A12K.01	brca	5.2437	237.508	234.115
						TCGA.C8.A12L.01	brca	9.1017	22.5564	4.353
						TCGA.C8.A12M.01	brca	2.6821	15.02	5.9007
						TCGA.C8.A12N.01	brca	2.8217	14.1086	5.6435
						TCGA.C8.A12O.01	brca	11.7328	44.4423	10.6661
						TCGA.C8.A12P.01	brca	33.2442	68.0168	14.9026
						TCGA.C8.A12Q.01	brca	14.628	15.225	5.6721
						TCGA.C8.A12T.01	brca	18.6671	56.0012	4.889
						TCGA.C8.A12U.01	brca	1.7301	14.2734	55.7958
						TCGA.C8.A12V.01	brca	3.6496	46.2287	55.15
						TCGA.C8.A12W.01	brca	124.73	47.9068	7.7687
						TCGA.C8.A12X.01	brca	0.7194	5.7554	12.2302
						TCGA.C8.A12Y.01	brca	1.3808	7.7327	6.3518
						TCGA.C8.A12Z.01	brca	6.8838	13.276	8.3589
						TCGA.C8.A130.01	brca	5.6926	13.2827	9.4877
						TCGA.C8.A131.01	brca	11.0683	123.677	11.0683
						TCGA.C8.A132.01	brca	5.7915	112.355	12.7413
						TCGA.C8.A133.01	brca	0	0.8818	5.2907
						TCGA.C8.A134.01	brca	34.5193	222.152	259.212
						TCGA.C8.A135.01	brca	0.4608	94.9309	5.53
						TCGA.C8.A137.01	brca	19.6495	11.6835	12.2146
						TCGA.C8.A138.01	brca	9.7599	36.471	9.7599
						TCGA.C8.A1HE.01	brca	2.4114	3.2152	6.1625
						TCGA.C8.A1HF.01	brca	1.485	15.741	23.463
						TCGA.C8.A1HG.01	brca	2.1994	6.5982	17.5953
						TCGA.C8.A1HI.01	brca	1.0352	34.4203	5.4348
						TCGA.C8.A1HJ.01	brca	2.451	814.776	12.9552
						TCGA.C8.A1HK.01	brca	4.5011	22.0055	6.5016
						TCGA.C8.A1HL.01	brca	4.1301	143.005	9.809
						TCGA.C8.A1HM.01	brca	0.4735	48.7689	24.1477
						TCGA.C8.A1HN.01	brca	10.2896	18.9961	10.8172
						TCGA.C8.A1HO.01	brca	9.8705	5.5521	7.0944
						TCGA.C8.A26V.01	brca	1.1136	22.717	1.7817
						TCGA.C8.A26W.01	brca	2.5049	8.9062	6.123
						TCGA.C8.A26X.01	brca	35.3698	16.5365	225.999
						TCGA.C8.A26Y.01	brca	9.1785	82.9127	24.4761
						TCGA.C8.A26Z.01	brca	0.2995	14.3756	2.9949
						TCGA.C8.A273.01	brca	0.5866	14.9582	3.8129
						TCGA.C8.A274.01	brca	2.4893	13.2762	1.9361
						TCGA.C8.A275.01	brca	117.093	27.0668	15.887
						TCGA.C8.A278.01	brca	2.658	32.5607	32.893
						TCGA.C8.A27A.01	brca	6.108	34.8667	14.7611
						TCGA.C8.A27B.01	brca	5.2206	1764.03	84.8342
						TCGA.C8.A3M7.01	brca	0	36.4173	9.8425
						TCGA.C8.A3M8.01	brca	6.1333	26.4	7.7333
						TCGA.C8.A8HP.01	brca	29.7737	37.0652	16.4059
						TCGA.C8.A8HQ.01	brca	11.3793	175.862	7.931
						TCGA.C8.A8HR.01	brca	0.8731	103.46	8.7308
						TCGA.D8.A13Y.01	brca	9.1263	55.8529	8.0311
						TCGA.D8.A13Z.01	brca	6.4777	120.918	9.7166
						TCGA.D8.A140.01	brca	5.102	14.5212	11.3815
						TCGA.D8.A141.01	brca	9.8707	46.9707	10.8918
						TCGA.D8.A142.01	brca	10.3586	39.3094	58.1673
						TCGA.D8.A143.01	brca	6.0527	197.847	13.6185
						TCGA.D8.A145.01	brca	30.6699	21.7918	4.4391
						TCGA.D8.A146.01	brca	8.188	50.1958	7.832
						TCGA.D8.A147.01	brca	7.7148	440.752	791.609
						TCGA.D8.A1J8.01	brca	1.9173	104.355	22.1857
						TCGA.D8.A1J9.01	brca	12.2972	51.0204	6.0178
						TCGA.D8.A1JA.01	brca	93.987	89.1116	14.3554
						TCGA.D8.A1JB.01	brca	0.8982	45.8066	8.9817
						TCGA.D8.A1JC.01	brca	5.9884	70.8627	10.9787
						TCGA.D8.A1JD.01	brca	4.1225	29.0997	6.3049
						TCGA.D8.A1JE.01	brca	3.413	143.06	7.6792
						TCGA.D8.A1JF.01	brca	10.1457	14.7837	8.1165
						TCGA.D8.A1JG.01	brca	7.7615	27.4239	27.1651
						TCGA.D8.A1JH.01	brca	11.9799	68.0558	9.431
						TCGA.D8.A1JI.01	brca	0.3858	0.7716	3.0864
						TCGA.D8.A1JJ.01	brca	10.589	47.6506	6.4711
						TCGA.D8.A1JK.01	brca	3.3353	53.8416	47.1709
						TCGA.D8.A1JL.01	brca	8.067	143.25	225.142
						TCGA.D8.A1JM.01	brca	1.2278	1233.98	687.284
						TCGA.D8.A1JN.01	brca	0	6.7362	3.6272
						TCGA.D8.A1JP.01	brca	26.8972	17.7714	7.6849
						TCGA.D8.A1JS.01	brca	0	3.231	4.5234
						TCGA.D8.A1JT.01	brca	0.2978	14.592	19.9524
						TCGA.D8.A1JU.01	brca	1.2496	67.1665	12.4961
						TCGA.D8.A1X5.01	brca	6.9816	24.8718	11.345
						TCGA.D8.A1X6.01	brca	0.5102	3.0614	3.3166
						TCGA.D8.A1X7.01	brca	2.4652	6.574	7.1218
						TCGA.D8.A1X8.01	brca	0.9549	10.822	9.2305
						TCGA.D8.A1X9.01	brca	16.1882	70.8233	17.1999
						TCGA.D8.A1XA.01	brca	2.4341	6.0852	6.8966
						TCGA.D8.A1XB.01	brca	9.6022	26.9776	9.6022
						TCGA.D8.A1XC.01	brca	0.4429	3.1001	6.2002
						TCGA.D8.A1XD.01	brca	0.8746	15.3056	2.6238
						TCGA.D8.A1XF.01	brca	0.6989	3.1449	7.6876
						TCGA.D8.A1XG.01	brca	1.1603	23.5933	11.99
						TCGA.D8.A1XJ.01	brca	0.6039	20.533	5.4352
						TCGA.D8.A1XK.01	brca	3.2584	2702.33	16.0206
						TCGA.D8.A1XL.01	brca	2.1687	18.279	12.3925
						TCGA.D8.A1XM.01	brca	8.4388	26.635	5.8017
						TCGA.D8.A1XO.01	brca	16.4494	18.9587	6.6913
						TCGA.D8.A1XQ.01	brca	1.7174	1753.7	30.0537
						TCGA.D8.A1XR.01	brca	3.0002	59.2537	9.0006
						TCGA.D8.A1XS.01	brca	8.4759	23.6739	9.9372
						TCGA.D8.A1XT.01	brca	14.8158	139.956	15.3449
						TCGA.D8.A1XU.01	brca	13.7575	12.8977	5.7323
						TCGA.D8.A1XV.01	brca	0	0.5152	4.1216
						TCGA.D8.A1XW.01	brca	43.6386	100.82	15.0478
						TCGA.D8.A1XY.01	brca	2.9742	57.8321	10.9055
						TCGA.D8.A1XZ.01	brca	31.3989	17.9422	7.5694
						TCGA.D8.A1Y0.01	brca	0	34.7192	9.0572
						TCGA.D8.A1Y1.01	brca	6.6719	37.6296	4.0031
						TCGA.D8.A1Y2.01	brca	15.2167	74.7604	14.8859
						TCGA.D8.A1Y3.01	brca	0.3156	9.783	10.4142
						TCGA.D8.A27E.01	brca	0	2.3036	8.3507
						TCGA.D8.A27F.01	brca	2.9783	788.163	96.659
						TCGA.D8.A27G.01	brca	0.3237	19.4238	8.417
						TCGA.D8.A27H.01	brca	32.1835	328.683	826.5
						TCGA.D8.A27I.01	brca	1.7488	56.2518	5.5377
						TCGA.D8.A27K.01	brca	0.3256	11.0713	8.7919
						TCGA.D8.A27L.01	brca	5.9572	42.7836	4.0617
						TCGA.D8.A27M.01	brca	20.0123	669.027	50.1847
						TCGA.D8.A27N.01	brca	30.456	60.2499	16.2211
						TCGA.D8.A27P.01	brca	4.3341	32.3089	3.1521
						TCGA.D8.A27R.01	brca	68.4556	124.589	9.8576
						TCGA.D8.A27T.01	brca	1.6582	63.3448	8.9545
						TCGA.D8.A27V.01	brca	0	110.738	3.146
						TCGA.D8.A27W.01	brca	82.454	10.7975	7.362
						TCGA.D8.A3Z5.01	brca	0	61.8627	2.7192
						TCGA.D8.A3Z6.01	brca	2.2936	25.8847	2.9489
						TCGA.D8.A4Z1.01	brca	0	101.115	1.5398
						TCGA.D8.A73U.01	brca	15.6269	27.8354	25.8821
						TCGA.D8.A73W.01	brca	22.1572	138.378	8.7793
						TCGA.D8.A73X.01	brca	1.4075	15.8339	3.5186
						TCGA.E2.A105.01	brca	0.9615	6.0897	4.4872
						TCGA.E2.A106.01	brca	0.7244	53.6038	1.4488
						TCGA.E2.A107.01	brca	0.9917	15.2066	4.6281
						TCGA.E2.A108.01	brca	2.1627	66.61	16.4362
						TCGA.E2.A109.01	brca	11.3934	24.3264	7.6982
						TCGA.E2.A10A.01	brca	15.841	20.6903	5.8192
						TCGA.E2.A10B.01	brca	10.2418	21.0526	3.6984
						TCGA.E2.A10C.01	brca	4.2816	11.8934	6.6603
						TCGA.E2.A10E.01	brca	9.0824	16.2856	4.6978
						TCGA.E2.A10F.01	brca	13.8044	14.8942	5.0858
						TCGA.E2.A14N.01	brca	0	1387.53	24.1233
						TCGA.E2.A14O.01	brca	1.2024	22.8457	4.8096
						TCGA.E2.A14P.01	brca	6.0072	14.4173	5.2062
						TCGA.E2.A14Q.01	brca	0.3319	22.5689	2.3233
						TCGA.E2.A14R.01	brca	3.2099	41.7288	990.026
						TCGA.E2.A14S.01	brca	0.3106	0.6212	6.2121
						TCGA.E2.A14T.01	brca	8.982	10.6151	7.0768
						TCGA.E2.A14U.01	brca	0	54.85	2.8048
						TCGA.E2.A14V.01	brca	7.5814	32.9625	6.2629
						TCGA.E2.A14W.01	brca	0.4792	11.9789	5.7499
						TCGA.E2.A14X.01	brca	0.2496	15.977	42.6886
						TCGA.E2.A14Y.01	brca	2.1175	656.961	13.7639
						TCGA.E2.A14Z.01	brca	1.7937	22.4215	12.1076
						TCGA.E2.A150.01	brca	2.4282	1664.1	985.836
						TCGA.E2.A152.01	brca	13.456	97.754	6.728
						TCGA.E2.A153.01	brca	6.1179	34.4828	3.8932
						TCGA.E2.A154.01	brca	1.4911	15.9046	5.9642
						TCGA.E2.A155.01	brca	0.2822	15.8014	5.079
						TCGA.E2.A156.01	brca	0.7179	4.3073	2.8715
						TCGA.E2.A158.01	brca	1.0282	4.7982	11.9955
						TCGA.E2.A159.01	brca	2.143	424.681	20.359
						TCGA.E2.A15A.01	brca	7.9981	21.4349	9.5977
						TCGA.E2.A15A.06	brca	0.3043	47.7676	14.9083
						TCGA.E2.A15C.01	brca	5.6	26	5.6
						TCGA.E2.A15D.01	brca	12.9597	13.31	5.6042
						TCGA.E2.A15E.01	brca	1.5182	19.7368	4.0486
						TCGA.E2.A15E.06	brca	0.7533	13.936	4.5198
						TCGA.E2.A15F.01	brca	0.4225	17.3233	5.9153
						TCGA.E2.A15G.01	brca	0.8197	4.0984	2.8689
						TCGA.E2.A15H.01	brca	15.6942	60.7646	4.0241
						TCGA.E2.A15I.01	brca	1.0597	16.2493	8.1247
						TCGA.E2.A15J.01	brca	0.3534	4.947	3.1802
						TCGA.E2.A15K.01	brca	1.9137	14.5441	8.4202
						TCGA.E2.A15K.06	brca	0	4.0418	4.0418
						TCGA.E2.A15L.01	brca	5.1041	44.0226	4.7851
						TCGA.E2.A15M.01	brca	3.9191	138.82	37.1287
						TCGA.E2.A15O.01	brca	0.8241	17.3071	6.5932
						TCGA.E2.A15P.01	brca	0.2737	36.6792	2.4635
						TCGA.E2.A15R.01	brca	0.9435	34.436	6.1324
						TCGA.E2.A15S.01	brca	203.307	35.0827	8.6269
						TCGA.E2.A15T.01	brca	0.3137	1.2548	2.5096
						TCGA.E2.A1AZ.01	brca	8.2521	296.324	24.7562
						TCGA.E2.A1B0.01	brca	10.2117	30.078	8.355
						TCGA.E2.A1B1.01	brca	1.6837	60.6124	11.5753
						TCGA.E2.A1B4.01	brca	1.0574	17.9763	1.5861
						TCGA.E2.A1B5.01	brca	0	25.6082	8.9629
						TCGA.E2.A1B6.01	brca	1.5618	48.1928	24.5426
						TCGA.E2.A1BC.01	brca	8.751	19.8886	5.5688
						TCGA.E2.A1BD.01	brca	0.5033	18.621	3.7745
						TCGA.E2.A1IE.01	brca	0.7474	12.7063	1.9931
						TCGA.E2.A1IF.01	brca	2.9728	82.8142	4.2469
						TCGA.E2.A1IG.01	brca	30.8567	51.9691	4.8721
						TCGA.E2.A1IH.01	brca	22.9678	103.355	25.2645
						TCGA.E2.A1II.01	brca	56.83	588.634	1237.75
						TCGA.E2.A1IJ.01	brca	7.0649	51.3809	5.7803
						TCGA.E2.A1IK.01	brca	0.5556	17.2222	5.5556
						TCGA.E2.A1IL.01	brca	5.5027	13.2982	5.0441
						TCGA.E2.A1IN.01	brca	1.9074	105.995	6.5395
						TCGA.E2.A1IO.01	brca	1.1123	48.2018	6.3033
						TCGA.E2.A1IU.01	brca	0	13.9774	4.5221
						TCGA.E2.A1L6.01	brca	1.8699	17.7639	5.9213
						TCGA.E2.A1L7.01	brca	0	19.4104	12.6168
						TCGA.E2.A1L8.01	brca	3.3887	25.4151	11.5215
						TCGA.E2.A1L9.01	brca	11.5872	77.6071	8.3535
						TCGA.E2.A1LA.01	brca	0.8901	37.3832	15.1313
						TCGA.E2.A1LB.01	brca	86.7123	24.7108	4.9422
						TCGA.E2.A1LE.01	brca	8.4683	35.1435	4.2342
						TCGA.E2.A1LG.01	brca	0.3071	267.199	173.219
						TCGA.E2.A1LH.01	brca	5.4023	559.521	23.1526
						TCGA.E2.A1LI.01	brca	49.8798	356.671	115.685
						TCGA.E2.A1LK.01	brca	8.2168	41.0838	12.912
						TCGA.E2.A1LL.01	brca	4.6063	2249.03	54.6999
						TCGA.E2.A1LS.01	brca	0.5005	8.008	8.5085
						TCGA.E2.A2P5.01	brca	1.1136	15.219	2.2272
						TCGA.E2.A2P6.01	brca	1.4003	28.7065	11.5526
						TCGA.E2.A3DX.01	brca	6.096	25.3467	17.0047
						TCGA.E2.A56Z.01	brca	1.3526	6.312	7.2137
						TCGA.E2.A570.01	brca	3.7453	32.1027	9.0958
						TCGA.E2.A572.01	brca	0	4.9981	7.4972
						TCGA.E2.A573.01	brca	2.3354	182.627	133.584
						TCGA.E2.A574.01	brca	2.2447	820.427	1098.77
						TCGA.E2.A576.01	brca	1.8332	3.6664	5.0412
						TCGA.E2.A9RU.01	brca	9.4356	81.5501	6.7397
						TCGA.E9.A1N3.01	brca	0.8463	2.821	7.6168
						TCGA.E9.A1N4.01	brca	2.714	12.0894	17.7641
						TCGA.E9.A1N5.01	brca	3.4506	25.14	5.9153
						TCGA.E9.A1N6.01	brca	8.5511	107.838	4.7506
						TCGA.E9.A1N8.01	brca	1.4091	876.468	267.262
						TCGA.E9.A1N9.01	brca	1.8187	30.0082	10.4574
						TCGA.E9.A1NA.01	brca	7.4212	4.9474	5.8751
						TCGA.E9.A1NC.01	brca	8.5194	369.176	968.378
						TCGA.E9.A1ND.01	brca	8.4957	455.77	511.242
						TCGA.E9.A1NE.01	brca	1.0679	64.8779	9.8785
						TCGA.E9.A1NF.01	brca	4.9532	66.2494	10.5256
						TCGA.E9.A1NG.01	brca	35.3228	266.443	10.0487
						TCGA.E9.A1NH.01	brca	12.9696	25.9392	4.025
						TCGA.E9.A1NI.01	brca	1.5641	33.8895	8.8634
						TCGA.E9.A1QZ.01	brca	0.9114	40.4074	9.1144
						TCGA.E9.A1R0.01	brca	0.5866	28.1562	3.5195
						TCGA.E9.A1R2.01	brca	1.3799	12.8795	9.1996
						TCGA.E9.A1R3.01	brca	2.004	81.9138	9.7695
						TCGA.E9.A1R4.01	brca	5.1664	93.7896	16.6914
						TCGA.E9.A1R5.01	brca	9.5121	15.7442	8.2001
						TCGA.E9.A1R6.01	brca	0.7297	7.6623	6.9325
						TCGA.E9.A1R7.01	brca	0	6.3336	3.8705
						TCGA.E9.A1RA.01	brca	1.8832	10.8286	2.8249
						TCGA.E9.A1RB.01	brca	8.845	64.5161	10.9261
						TCGA.E9.A1RC.01	brca	17.6091	42.9067	1.2401
						TCGA.E9.A1RD.01	brca	2.0583	8.7477	2.0583
						TCGA.E9.A1RE.01	brca	1.4586	25.6709	3.5006
						TCGA.E9.A1RF.01	brca	66.5579	30.0364	8.5331
						TCGA.E9.A1RG.01	brca	3.2348	11.5527	5.0832
						TCGA.E9.A1RH.01	brca	14.5904	85.0052	10.1499
						TCGA.E9.A1RI.01	brca	2.8934	31.5062	5.1439
						TCGA.E9.A226.01	brca	14.2718	35.6795	0
						TCGA.E9.A227.01	brca	0.6274	13.8018	4.7051
						TCGA.E9.A228.01	brca	24.7785	47.8283	10.3724
						TCGA.E9.A229.01	brca	12.6443	33.5349	8.796
						TCGA.E9.A22A.01	brca	28.6136	85.8407	13.2743
						TCGA.E9.A22B.01	brca	7.3461	45.6735	10.8594
						TCGA.E9.A22D.01	brca	0	45.3725	10.8275
						TCGA.E9.A22E.01	brca	8.2366	134.032	9.7342
						TCGA.E9.A22G.01	brca	3.7316	241.312	59.7061
						TCGA.E9.A22H.01	brca	1.513	9.3299	7.0605
						TCGA.E9.A243.01	brca	0.2334	548.891	49.9417
						TCGA.E9.A244.01	brca	18.2947	54.5573	43.4499
						TCGA.E9.A245.01	brca	11.2915	5.6457	6.3514
						TCGA.E9.A247.01	brca	0.5755	30.216	69.3529
						TCGA.E9.A248.01	brca	32.0492	883.457	31.4017
						TCGA.E9.A249.01	brca	1.5824	17.6699	6.857
						TCGA.E9.A24A.01	brca	17.6965	56.0888	8.6983
						TCGA.E9.A295.01	brca	10.1413	96.5834	14.0046
						TCGA.E9.A2JS.01	brca	3.1024	26.8873	8.9624
						TCGA.E9.A2JT.01	brca	1.4164	28.3286	43.9093
						TCGA.E9.A3HO.01	brca	0	28.9794	5.0399
						TCGA.E9.A3Q9.01	brca	0	10.1631	3.9089
						TCGA.E9.A3QA.01	brca	5.9227	617.83	115.96
						TCGA.E9.A3X8.01	brca	1.4663	28.8372	2.9326
						TCGA.E9.A54X.01	brca	0.4965	1.9861	7.4479
						TCGA.E9.A54Y.01	brca	2.3697	2.3697	7.109
						TCGA.E9.A5FK.01	brca	0	29.4272	3.1529
						TCGA.E9.A5FL.01	brca	1250.65	2087.21	285.53
						TCGA.E9.A5UO.01	brca	0	9.4349	8.6486
						TCGA.E9.A5UP.01	brca	0.3994	7.5879	7.5879
						TCGA.E9.A6HE.01	brca	3.8344	14.1871	3.4509
						TCGA.EW.A1IW.01	brca	2.733	32.7958	9.5655
						TCGA.EW.A1IX.01	brca	1.4649	32.5938	3.296
						TCGA.EW.A1IY.01	brca	5.9258	25.1142	9.8764
						TCGA.EW.A1IZ.01	brca	2.1379	31.2133	14.1101
						TCGA.EW.A1J1.01	brca	0	5.454	8.6622
						TCGA.EW.A1J2.01	brca	14.3117	50.4676	4.7706
						TCGA.EW.A1J3.01	brca	3.0102	27.0915	5.0169
						TCGA.EW.A1J5.01	brca	0	29.4737	15.5263
						TCGA.EW.A1J6.01	brca	0	17.7173	14.9916
						TCGA.EW.A1OV.01	brca	1.0549	35.3376	21.097
						TCGA.EW.A1OW.01	brca	7.6785	712.178	14.3971
						TCGA.EW.A1OX.01	brca	11.0685	2.98	12.3457
						TCGA.EW.A1OY.01	brca	1.0336	17.0543	6.7183
						TCGA.EW.A1OZ.01	brca	9.656	11.0354	8.9663
						TCGA.EW.A1P0.01	brca	2.2341	8.4897	15.1921
						TCGA.EW.A1P1.01	brca	23.3266	152.637	8.6207
						TCGA.EW.A1P3.01	brca	0	18.3946	4.4593
						TCGA.EW.A1P4.01	brca	1.139	784.738	147.684
						TCGA.EW.A1P5.01	brca	1.1421	16.7507	4.5684
						TCGA.EW.A1P6.01	brca	2.1167	17.9918	5.2917
						TCGA.EW.A1P7.01	brca	7.4503	600.993	251.242
						TCGA.EW.A1P8.01	brca	10.7527	23.2975	59.4982
						TCGA.EW.A1PA.01	brca	0	12.8988	5.9887
						TCGA.EW.A1PB.01	brca	0.9682	931.693	497.635
						TCGA.EW.A1PC.01	brca	2.587	64.2051	4.4685
						TCGA.EW.A1PD.01	brca	11.1403	54.3513	6.7517
						TCGA.EW.A1PE.01	brca	6.3578	55.6306	17.8018
						TCGA.EW.A1PF.01	brca	8.2764	25.5488	6.1173
						TCGA.EW.A1PG.01	brca	0	148.619	9.3923
						TCGA.EW.A1PH.01	brca	109.87	999.64	1210.73
						TCGA.EW.A2FR.01	brca	29.0942	140.372	7.7984
						TCGA.EW.A2FS.01	brca	17.4268	91.5832	12.9774
						TCGA.EW.A2FV.01	brca	1.4234	247.385	7.1169
						TCGA.EW.A2FW.01	brca	1.1165	18.236	8.1876
						TCGA.EW.A3E8.01	brca	0	20.9054	6.7801
						TCGA.EW.A3U0.01	brca	8.8837	262.474	41.9959
						TCGA.EW.A423.01	brca	1.3146	9.5309	6.9017
						TCGA.EW.A424.01	brca	0.3191	17.8671	13.7194
						TCGA.EW.A6S9.01	brca	4.2065	32.8872	6.1185
						TCGA.EW.A6SA.01	brca	0	139.986	4.9662
						TCGA.EW.A6SB.01	brca	5.0125	26.9424	310.777
						TCGA.EW.A6SC.01	brca	0.4198	17.6322	8.3963
						TCGA.EW.A6SD.01	brca	33.0994	7.9606	15.9212
						TCGA.GI.A2C8.01	brca	2.008	7.0281	15.3949
						TCGA.GI.A2C9.01	brca	6.6789	864.919	643.847
						TCGA.GM.A2D9.01	brca	10.1229	20.2458	5.7845
						TCGA.GM.A2DA.01	brca	2.1716	41.2595	3.2573
						TCGA.GM.A2DB.01	brca	23.8628	32.0656	19.3885
						TCGA.GM.A2DC.01	brca	1.6414	8.2068	12.5838
						TCGA.GM.A2DD.01	brca	2.4597	29.0247	11.8067
						TCGA.GM.A2DF.01	brca	6.5261	290.663	408.132
						TCGA.GM.A2DH.01	brca	1.8253	14.6023	8.605
						TCGA.GM.A2DI.01	brca	0.7911	51.4241	18.1962
						TCGA.GM.A2DK.01	brca	5.7177	50.5063	9.5295
						TCGA.GM.A2DL.01	brca	18.3773	83.4048	7.0682
						TCGA.GM.A2DM.01	brca	3.8711	34.0655	9.6777
						TCGA.GM.A2DN.01	brca	1.157	40.108	19.6683
						TCGA.GM.A2DO.01	brca	1.9685	9.8425	63.9764
						TCGA.GM.A3NW.01	brca	1.8477	15.5211	3.3259
						TCGA.GM.A3NY.01	brca	0	18.3709	7.6256
						TCGA.GM.A3XG.01	brca	0.694	61.074	4.8582
						TCGA.GM.A3XL.01	brca	0.3461	364.14	102.458
						TCGA.GM.A3XN.01	brca	3.1938	52.1647	7.807
						TCGA.GM.A4E0.01	brca	0.7343	44.7925	12.4832
						TCGA.GM.A5PV.01	brca	0	35.6718	5.1526
						TCGA.GM.A5PX.01	brca	0.3908	35.9515	3.517
						TCGA.HN.A2NL.01	brca	1.0219	470.067	119.901
						TCGA.HN.A2OB.01	brca	0.8993	21.5827	1.3489
						TCGA.JL.A3YW.01	brca	40.3458	154.899	19.0922
						TCGA.JL.A3YX.01	brca	1.2388	20.4398	3.4066
						TCGA.LD.A66U.01	brca	1.1236	8.2397	2.6217
						TCGA.LD.A74U.01	brca	0	60.0613	5.7201
						TCGA.LD.A7W5.01	brca	0	26.2905	4.8092
						TCGA.LD.A7W6.01	brca	0	22.2894	7.1779
						TCGA.LD.A9QF.01	brca	5.8737	91.5321	13.2159
						TCGA.LL.A440.01	brca	1.3334	66.0055	10.0008
						TCGA.LL.A441.01	brca	1.8893	30.8589	28.3398
						TCGA.LL.A442.01	brca	0.7792	7.7922	3.1169
						TCGA.LL.A50Y.01	brca	1.5207	18.2486	4.0553
						TCGA.LL.A5YL.01	brca	2.1827	24.8827	3.4923
						TCGA.LL.A5YM.01	brca	1.5285	28.0219	3.5664
						TCGA.LL.A5YN.01	brca	5.2247	28.2132	7.3145
						TCGA.LL.A5YO.01	brca	4.9566	123.916	31.392
						TCGA.LL.A5YP.01	brca	43.8517	848.101	16.2749
						TCGA.LL.A6FP.01	brca	1.3441	2.3522	0.336
						TCGA.LL.A6FQ.01	brca	0.471	8.0075	9.4206
						TCGA.LL.A6FR.01	brca	1.8683	840.106	1.8683
						TCGA.LL.A73Y.01	brca	6.9072	315.55	54.8941
						TCGA.LL.A73Z.01	brca	10.101	69.7888	9.1827
						TCGA.LL.A740.01	brca	10.9003	60.9608	6.0557
						TCGA.LL.A7SZ.01	brca	2.7875	21.6028	24.3902
						TCGA.LL.A7T0.01	brca	4.2373	21.1864	5.6497
						TCGA.LL.A8F5.01	brca	13.1165	248.688	19.937
						TCGA.LL.A9Q3.01	brca	6.0661	44.4847	5.5606
						TCGA.LQ.A4E4.01	brca	2.4936	14.4629	5.9847
						TCGA.MS.A51U.01	brca	1.0433	40.6886	8.3464
						TCGA.OK.A5Q2.01	brca	2.6626	30.0494	4.9448
						TCGA.OL.A5D6.01	brca	5.1256	15.3767	8.2009
						TCGA.OL.A5D7.01	brca	1.4335	29.6261	11.4682
						TCGA.OL.A5D8.01	brca	0.4136	3.7221	4.1356
						TCGA.OL.A5DA.01	brca	0.8306	29.901	2.0765
						TCGA.OL.A5RU.01	brca	0	13.8229	5.1836
						TCGA.OL.A5RV.01	brca	0	24.1974	0.4172
						TCGA.OL.A5RW.01	brca	2.009	687.594	31.6424
						TCGA.OL.A5RX.01	brca	1.2424	33.1297	2.4847
						TCGA.OL.A5RY.01	brca	3.0581	47.4006	165.138
						TCGA.OL.A5RZ.01	brca	1.5345	95.6522	14.8338
						TCGA.OL.A5S0.01	brca	13.6865	96.3123	16.221
						TCGA.OL.A66H.01	brca	0	12.0934	11.6764
						TCGA.OL.A66I.01	brca	46.3224	41.7319	41.7319
						TCGA.OL.A66J.01	brca	0.9013	15.7729	7.2105
						TCGA.OL.A66K.01	brca	0	23.6245	4.5591
						TCGA.OL.A66L.01	brca	2.3745	32.7674	2.8493
						TCGA.OL.A66N.01	brca	0	33.6381	3.8322
						TCGA.OL.A66O.01	brca	0.363	1.452	8.3492
						TCGA.OL.A66P.01	brca	2.1583	21.5827	17.9856
						TCGA.OL.A6VO.01	brca	4.0296	172.263	8.3949
						TCGA.OL.A6VQ.01	brca	0	15.1526	7.0712
						TCGA.OL.A6VR.01	brca	0.3042	8.5184	2.4338
						TCGA.OL.A97C.01	brca	0.6752	442.269	11.4787
						TCGA.PE.A5DC.01	brca	27.0415	21.8908	17.5985
						TCGA.PE.A5DD.01	brca	5.4672	54.672	0.497
						TCGA.PE.A5DE.01	brca	0.4441	23.984	3.109
						TCGA.PL.A8LV.01	brca	3.658	1715.13	272.977
						TCGA.PL.A8LX.01	brca	0	18.6937	5.7861
						TCGA.PL.A8LY.01	brca	2.7367	170.772	3.8314
						TCGA.PL.A8LZ.01	brca	7.2595	1331.91	87.1143
						TCGA.S3.A6ZF.01	brca	1.9711	49.6058	9.1984
						TCGA.S3.A6ZG.01	brca	1.2474	13.0975	6.8606
						TCGA.S3.A6ZH.01	brca	28.9741	9.1331	4.724
						TCGA.S3.AA0Z.01	brca	0	14.0459	13.7033
						TCGA.S3.AA10.01	brca	7.231	1393.02	37.0055
						TCGA.S3.AA11.01	brca	2.2212	11.1062	1.777
						TCGA.S3.AA12.01	brca	1.4699	11.2691	6.3695
						TCGA.S3.AA14.01	brca	2.2541	19.1595	1.6905
						TCGA.S3.AA15.01	brca	0.6075	751.519	46.1725
						TCGA.S3.AA17.01	brca	0	30.7926	25.1545
						TCGA.UL.AAZ6.01	brca	2.3953	95.4143	42.7169
						TCGA.UU.A93S.01	brca	1.4472	81.042	16.6425
						TCGA.V7.A7HQ.01	brca	0	20.3226	7.39
						TCGA.W8.A86G.01	brca	0.4746	113.431	3.3223
						TCGA.WT.AB41.01	brca	6.3091	11.041	8.6751
						TCGA.WT.AB44.01	brca	4.887	33.3944	4.0725
						TCGA.XX.A899.01	brca	2.7559	16.1417	6.6929
						TCGA.XX.A89A.01	brca	1.4171	49.1261	9.4473
						TCGA.Z7.A8R5.01	brca	0.5973	122.45	8.3625
						TCGA.Z7.A8R6.01	brca	1.3919	9.7434	3.1318
						TCGA.2W.A8YY.01	cesc	376.609	156.652	639.485
						TCGA.4J.AA1J.01	cesc	2.9902	1161.47	39.2994
						TCGA.BI.A0VR.01	cesc	2.7508	1762.45	341.487
						TCGA.BI.A0VS.01	cesc	99.9053	4799.59	487.813
						TCGA.BI.A20A.01	cesc	10.259	60.5609	28.4603
						TCGA.C5.A0TN.01	cesc	207.863	1665.39	546.199
						TCGA.C5.A1BE.01	cesc	11.5385	2714.79	1591.42
						TCGA.C5.A1BF.01	cesc	889.242	394.462	435.306
						TCGA.C5.A1BI.01	cesc	0.9912	289.75	21.4752
						TCGA.C5.A1BJ.01	cesc	21.1457	1090.42	704.566
						TCGA.C5.A1BK.01	cesc	0	1624.42	387.788
						TCGA.C5.A1BL.01	cesc	2.2553	36.0848	1490.75
						TCGA.C5.A1BM.01	cesc	0	411.901	237.249
						TCGA.C5.A1BN.01	cesc	34.3568	1592.1	132.823
						TCGA.C5.A1BQ.01	cesc	27.7693	73.507	32.0164
						TCGA.C5.A1M5.01	cesc	14.2866	722.496	567.724
						TCGA.C5.A1M6.01	cesc	354.871	1862.7	10.6007
						TCGA.C5.A1M7.01	cesc	0.2759	833.609	265.728
						TCGA.C5.A1M8.01	cesc	2.5381	593.627	20.8686
						TCGA.C5.A1M9.01	cesc	112.983	1689.3	106.789
						TCGA.C5.A1ME.01	cesc	134.701	1455.1	703.437
						TCGA.C5.A1MF.01	cesc	129.857	384.376	244.131
						TCGA.C5.A1MH.01	cesc	5.988	1384.81	971.636
						TCGA.C5.A1MI.01	cesc	1691.09	1267.91	489.868
						TCGA.C5.A1MJ.01	cesc	371.012	1265.2	1445.41
						TCGA.C5.A1MK.01	cesc	2.2422	59.7907	22.0478
						TCGA.C5.A1ML.01	cesc	1051.95	5620.25	1062.67
						TCGA.C5.A1MN.01	cesc	659.307	2406.17	1542.06
						TCGA.C5.A1MP.01	cesc	2.7565	456.202	32.6187
						TCGA.C5.A1MQ.01	cesc	105.567	331.517	51.2401
						TCGA.C5.A2LS.01	cesc	152.054	1972.47	725.964
						TCGA.C5.A2LT.01	cesc	102.138	4583.63	299.941
						TCGA.C5.A2LV.01	cesc	15.4128	2967.34	669.725
						TCGA.C5.A2LX.01	cesc	25.9548	141.268	424.175
						TCGA.C5.A2LY.01	cesc	18.1219	719.385	4.3932
						TCGA.C5.A2LZ.01	cesc	130.553	1023.94	965.607
						TCGA.C5.A2M1.01	cesc	20.8905	1106.56	1264.4
						TCGA.C5.A2M2.01	cesc	6.3844	4959.34	743.28
						TCGA.C5.A3HD.01	cesc	53.8405	1395.87	343.649
						TCGA.C5.A3HE.01	cesc	443.813	780.081	718.735
						TCGA.C5.A3HF.01	cesc	250.323	1182.73	43.9845
						TCGA.C5.A3HL.01	cesc	4.7969	17.9085	245.923
						TCGA.C5.A7CG.01	cesc	26.4123	581.805	31.1812
						TCGA.C5.A7CH.01	cesc	2.9791	2451.84	6.9513
						TCGA.C5.A7CJ.01	cesc	0	69.5967	58.9874
						TCGA.C5.A7CK.01	cesc	53.1335	2365.46	263.965
						TCGA.C5.A7CL.01	cesc	2.1949	393.327	21.5101
						TCGA.C5.A7CM.01	cesc	1.5345	918.67	21.4834
						TCGA.C5.A7CO.01	cesc	372.324	673.428	1270.23
						TCGA.C5.A7UC.01	cesc	0.4056	2050.09	0.4056
						TCGA.C5.A7UE.01	cesc	0.5546	1550.75	871.326
						TCGA.C5.A7UH.01	cesc	783.561	1300.09	1096.48
						TCGA.C5.A7UI.01	cesc	0	265.658	3.7103
						TCGA.C5.A7X3.01	cesc	1265.95	703.557	411.632
						TCGA.C5.A7X5.01	cesc	257.111	5744.39	1497.01
						TCGA.C5.A7X8.01	cesc	8.6815	756.375	365.166
						TCGA.C5.A7XC.01	cesc	1.4245	267.331	45.584
						TCGA.C5.A8XH.01	cesc	83.6707	1498.75	435.319
						TCGA.C5.A8XI.01	cesc	15.3904	320.571	51.8018
						TCGA.C5.A8XJ.01	cesc	2575.13	630.745	901.12
						TCGA.C5.A8XK.01	cesc	98.3165	649.158	6.734
						TCGA.C5.A8YQ.01	cesc	292.683	40.4878	565.854
						TCGA.C5.A8YR.01	cesc	826.813	38.602	84.507
						TCGA.C5.A8YT.01	cesc	6.191	176.442	18.5729
						TCGA.C5.A8ZZ.01	cesc	4.9585	2102.79	1836.94
						TCGA.C5.A901.01	cesc	0.4034	814.111	11.2959
						TCGA.C5.A902.01	cesc	17.2969	27.3532	5.2293
						TCGA.C5.A905.01	cesc	0.7271	2375.72	932.837
						TCGA.C5.A907.01	cesc	66.6667	704.197	459.259
						TCGA.DG.A2KH.01	cesc	27.2311	1687.52	844.702
						TCGA.DG.A2KJ.01	cesc	1197.56	37.8049	371.951
						TCGA.DG.A2KK.01	cesc	198.602	1478.87	26.0566
						TCGA.DG.A2KL.01	cesc	4.682	647.366	1069.37
						TCGA.DG.A2KM.01	cesc	10.7304	821.032	280.218
						TCGA.DR.A0ZL.01	cesc	4.4395	2266.57	373.726
						TCGA.DR.A0ZM.01	cesc	2.027	576.351	39.1892
						TCGA.DS.A0VK.01	cesc	0.7212	3058.12	799.087
						TCGA.DS.A0VL.01	cesc	1.827	1660.73	679.638
						TCGA.DS.A0VM.01	cesc	6.7952	1008.35	471.527
						TCGA.DS.A0VN.01	cesc	3.0834	2239.35	519.561
						TCGA.DS.A1O9.01	cesc	0.2419	64.3459	300.2
						TCGA.DS.A1OA.01	cesc	0.3818	1476.52	120.657
						TCGA.DS.A1OB.01	cesc	3.8692	734.789	2202.26
						TCGA.DS.A1OC.01	cesc	768.827	546.74	1342.04
						TCGA.DS.A1OD.01	cesc	44.5437	139.291	320.419
						TCGA.DS.A3LQ.01	cesc	109.08	1725.17	1829.98
						TCGA.DS.A5RQ.01	cesc	1.0067	20.6367	183.717
						TCGA.DS.A7WF.01	cesc	47.4826	577.648	30.4025
						TCGA.DS.A7WH.01	cesc	25.9829	2243.19	737.55
						TCGA.DS.A7WI.01	cesc	17.6211	1196.04	77.6432
						TCGA.EA.A1QS.01	cesc	5.033	1908.78	761.246
						TCGA.EA.A1QT.01	cesc	0.631	594.447	1324.78
						TCGA.EA.A3HQ.01	cesc	0.4416	1020.7	511.784
						TCGA.EA.A3HR.01	cesc	2.8155	1149.29	1836.56
						TCGA.EA.A3HS.01	cesc	0.827	2110.63	14.3355
						TCGA.EA.A3HT.01	cesc	2.3136	166.293	22.558
						TCGA.EA.A3HU.01	cesc	8.9699	301.794	534.433
						TCGA.EA.A3QD.01	cesc	2.2075	1172.19	80.206
						TCGA.EA.A3QE.01	cesc	3.4846	32.1651	266.166
						TCGA.EA.A3Y4.01	cesc	77.1056	1090.15	85.4093
						TCGA.EA.A410.01	cesc	25.6616	178.428	846.431
						TCGA.EA.A411.01	cesc	6.8889	680.034	42.5637
						TCGA.EA.A439.01	cesc	209.905	2037.71	282.848
						TCGA.EA.A43B.01	cesc	234.492	1093.39	94.0695
						TCGA.EA.A44S.01	cesc	4.0125	15.6041	312.974
						TCGA.EA.A4BA.01	cesc	839.173	1466.4	635.267
						TCGA.EA.A50E.01	cesc	3.4033	747.589	377.198
						TCGA.EA.A556.01	cesc	544.621	2976.36	1062.71
						TCGA.EA.A5FO.01	cesc	7.8101	79.8362	2.1695
						TCGA.EA.A5O9.01	cesc	2.4058	2506.01	7.2173
						TCGA.EA.A5ZD.01	cesc	0.4196	1378.35	29.7908
						TCGA.EA.A5ZE.01	cesc	0	286.07	6.2189
						TCGA.EA.A5ZF.01	cesc	163.106	767.05	24.6508
						TCGA.EA.A6QX.01	cesc	8.2889	302.349	22.1038
						TCGA.EA.A78R.01	cesc	4.8394	1164.13	617.287
						TCGA.EA.A97N.01	cesc	2.9615	207.799	114.511
						TCGA.EK.A2GZ.01	cesc	1383.2	2875.68	1410.6
						TCGA.EK.A2H0.01	cesc	36.1695	759.559	803.651
						TCGA.EK.A2H1.01	cesc	110.129	2547.43	557.476
						TCGA.EK.A2IP.01	cesc	3.3501	969.849	23.0318
						TCGA.EK.A2IR.01	cesc	5.408	4054.11	2832.98
						TCGA.EK.A2PG.01	cesc	11.5892	1188.11	17.1692
						TCGA.EK.A2PI.01	cesc	2.6084	120.313	175.742
						TCGA.EK.A2PK.01	cesc	0.8663	284.136	187.981
						TCGA.EK.A2PL.01	cesc	10.6862	670.979	58.4927
						TCGA.EK.A2PM.01	cesc	0.7205	964.784	6.1245
						TCGA.EK.A2R7.01	cesc	24.8343	1403.81	8.39
						TCGA.EK.A2R8.01	cesc	1186.26	1746.78	1051.7
						TCGA.EK.A2R9.01	cesc	630.212	815.435	320.753
						TCGA.EK.A2RA.01	cesc	0.625	3032.19	33.4375
						TCGA.EK.A2RB.01	cesc	1.9739	26.8456	112.12
						TCGA.EK.A2RC.01	cesc	0.7571	94.6342	148.008
						TCGA.EK.A2RE.01	cesc	4.0462	1477.54	663.576
						TCGA.EK.A2RJ.01	cesc	568.997	427.269	765.61
						TCGA.EK.A2RK.01	cesc	0	14.5455	181.091
						TCGA.EK.A2RL.01	cesc	308.848	2353.44	9.1528
						TCGA.EK.A2RM.01	cesc	16.5448	405.541	229.704
						TCGA.EK.A2RN.01	cesc	1.371	27.4207	353.728
						TCGA.EK.A2RO.01	cesc	1.5738	43.541	127.475
						TCGA.EK.A3GJ.01	cesc	276.098	980.488	19.5122
						TCGA.EK.A3GK.01	cesc	0.269	655.998	1490.05
						TCGA.EK.A3GM.01	cesc	56.2725	16.5337	14.7933
						TCGA.EK.A3GN.01	cesc	205.584	865.165	214.784
						TCGA.EX.A1H5.01	cesc	55.1939	32.8333	439.004
						TCGA.EX.A1H6.01	cesc	62.1042	326.456	663.534
						TCGA.EX.A3L1.01	cesc	108.281	2432.94	773.757
						TCGA.EX.A449.01	cesc	42.6126	52.9554	249.056
						TCGA.EX.A69L.01	cesc	0.4174	1382.72	15.8598
						TCGA.EX.A69M.01	cesc	0.4425	303.558	85.4032
						TCGA.EX.A8YF.01	cesc	100.803	187.333	12.0428
						TCGA.FU.A23K.01	cesc	77.6819	723.798	148.376
						TCGA.FU.A23L.01	cesc	48.2192	2235.07	430.959
						TCGA.FU.A2QG.01	cesc	25.0134	1625.34	1420.39
						TCGA.FU.A3EO.01	cesc	353.846	989.349	695.266
						TCGA.FU.A3HY.01	cesc	6.9128	858.991	482.393
						TCGA.FU.A3HZ.01	cesc	1836.09	65.6348	548.64
						TCGA.FU.A3NI.01	cesc	8.4188	35.9037	1.2381
						TCGA.FU.A3TQ.01	cesc	0.28	31.3638	236.348
						TCGA.FU.A3TX.01	cesc	357.184	6.9792	25.9226
						TCGA.FU.A3WB.01	cesc	19.7641	596.134	14.823
						TCGA.FU.A3YQ.01	cesc	0.3253	381.913	202.342
						TCGA.FU.A40J.01	cesc	791.89	1209.6	1235.24
						TCGA.FU.A57G.01	cesc	0.4485	606.794	76.6902
						TCGA.FU.A5XV.01	cesc	146.438	1402.37	1138.08
						TCGA.FU.A770.01	cesc	490.576	1475.8	517.066
						TCGA.GH.A9DA.01	cesc	19.1695	2101.56	4.1673
						TCGA.HG.A2PA.01	cesc	3.6341	1259.65	930.339
						TCGA.HM.A3JJ.01	cesc	13.3333	632.5	54.1667
						TCGA.HM.A3JK.01	cesc	3.4895	650.548	10.9671
						TCGA.HM.A4S6.01	cesc	1.2777	14.4804	305.366
						TCGA.HM.A6W2.01	cesc	24.3096	9.3827	754.451
						TCGA.HM.A6W2.06	cesc	25.5556	10.5556	60
						TCGA.IR.A3L7.01	cesc	2.5797	204.945	21.7843
						TCGA.IR.A3LA.01	cesc	1.4255	1043.48	112.259
						TCGA.IR.A3LB.01	cesc	97.8653	1703.91	964.513
						TCGA.IR.A3LC.01	cesc	0.872	265.659	6.1038
						TCGA.IR.A3LF.01	cesc	233.044	1258.17	1025.46
						TCGA.IR.A3LH.01	cesc	112.337	1924.43	51.6311
						TCGA.IR.A3LI.01	cesc	140.672	1872.19	414.01
						TCGA.IR.A3LK.01	cesc	472.088	2301.74	30.4117
						TCGA.IR.A3LL.01	cesc	3.1274	239.249	133.698
						TCGA.JW.A5VG.01	cesc	24.6609	1803.28	298.587
						TCGA.JW.A5VH.01	cesc	4.6674	690.393	771.295
						TCGA.JW.A5VI.01	cesc	669.541	872.409	848.258
						TCGA.JW.A5VJ.01	cesc	7.6675	552.462	17.3527
						TCGA.JW.A5VK.01	cesc	4.9639	895.758	515.343
						TCGA.JW.A5VL.01	cesc	0.354	1230.55	7.7883
						TCGA.JW.A69B.01	cesc	2005.33	387.077	245.922
						TCGA.JW.A852.01	cesc	55.5201	2499.1	171.418
						TCGA.JW.AAVH.01	cesc	24.8804	1190.91	1461.72
						TCGA.JX.A3PZ.01	cesc	14.7306	1123.74	840.909
						TCGA.JX.A3Q0.01	cesc	0	1025.67	16.4751
						TCGA.JX.A3Q8.01	cesc	113.75	1232.85	20.4082
						TCGA.JX.A5QV.01	cesc	0.9002	1995.72	1060.88
						TCGA.LP.A4AU.01	cesc	18.8158	364.863	73.2181
						TCGA.LP.A4AV.01	cesc	3.3389	20.8681	10.8514
						TCGA.LP.A4AW.01	cesc	0	1294.77	825.614
						TCGA.LP.A4AX.01	cesc	64.617	544.554	650.339
						TCGA.LP.A5U2.01	cesc	1.2565	58.2199	508.063
						TCGA.LP.A5U3.01	cesc	1.1623	1063.54	34.0953
						TCGA.LP.A7HU.01	cesc	77.8358	286.663	6.1699
						TCGA.MA.AA3W.01	cesc	22.6267	2207.57	209.542
						TCGA.MA.AA3X.01	cesc	0.484	27.1055	8.2285
						TCGA.MA.AA3Y.01	cesc	9.1125	1617.47	70.2421
						TCGA.MA.AA3Z.01	cesc	37.5218	2166.29	1638.61
						TCGA.MA.AA41.01	cesc	21.8362	222.333	101.737
						TCGA.MA.AA42.01	cesc	5.3974	17.1737	171.737
						TCGA.MA.AA43.01	cesc	489.331	1235.15	47.2699
						TCGA.MU.A51Y.01	cesc	2.8783	684.211	1676.81
						TCGA.MU.A5YI.01	cesc	1.7036	12.3509	5.9625
						TCGA.MU.A8JM.01	cesc	2.5644	1456.13	17.9506
						TCGA.MY.A5BD.01	cesc	97.1141	4304.17	1502.98
						TCGA.MY.A5BE.01	cesc	33.3333	82.1256	123.671
						TCGA.MY.A5BF.01	cesc	0.4575	1053.52	634.035
						TCGA.MY.A913.01	cesc	525.302	2400.9	563.465
						TCGA.PN.A8MA.01	cesc	0.4762	673.809	1137.14
						TCGA.Q1.A5R1.01	cesc	33.2479	1957.23	403.376
						TCGA.Q1.A5R2.01	cesc	0.9243	730.214	257.886
						TCGA.Q1.A5R3.01	cesc	247.592	2529.03	6.7321
						TCGA.Q1.A6DT.01	cesc	49.0512	2841.87	427.52
						TCGA.Q1.A6DV.01	cesc	196.305	1074.79	35.35
						TCGA.Q1.A6DW.01	cesc	1.5432	596.451	1413.19
						TCGA.Q1.A73O.01	cesc	13.1135	2294.12	466.467
						TCGA.Q1.A73P.01	cesc	199.618	689.003	362.612
						TCGA.Q1.A73Q.01	cesc	0.4363	799.738	672.339
						TCGA.Q1.A73R.01	cesc	77.6095	776.636	2.9746
						TCGA.Q1.A73S.01	cesc	783.863	2462.53	21.8518
						TCGA.R2.A69V.01	cesc	1.2763	914.486	69.5597
						TCGA.RA.A741.01	cesc	4.5721	782.398	94.8707
						TCGA.UC.A7PD.01	cesc	3.002	2161.42	654.001
						TCGA.UC.A7PF.01	cesc	3.125	1271.88	1234.38
						TCGA.UC.A7PG.01	cesc	0	321.377	128.168
						TCGA.UC.A7PG.06	cesc	0.4021	62.3304	13.6725
						TCGA.UC.A7PI.01	cesc	431.881	1141.43	573.494
						TCGA.VS.A8EB.01	cesc	606.672	285.42	54.7776
						TCGA.VS.A8EC.01	cesc	1057.05	2132.6	1102.67
						TCGA.VS.A8EG.01	cesc	2.9727	5.0535	207.788
						TCGA.VS.A8EH.01	cesc	5.5424	130.245	1321.46
						TCGA.VS.A8EI.01	cesc	102.842	2663.99	704.8
						TCGA.VS.A8EJ.01	cesc	26.7765	525.747	101.957
						TCGA.VS.A8EK.01	cesc	1.6061	528.006	379.442
						TCGA.VS.A8EL.01	cesc	3.6991	673.654	8.2203
						TCGA.VS.A8Q8.01	cesc	64.723	813.994	224.49
						TCGA.VS.A8Q9.01	cesc	0.461	261.362	174.702
						TCGA.VS.A8QA.01	cesc	108.567	963.151	293.281
						TCGA.VS.A8QC.01	cesc	67.4381	737.031	201.117
						TCGA.VS.A8QF.01	cesc	1.728	668.755	97.6347
						TCGA.VS.A8QH.01	cesc	0	1689.58	7.5188
						TCGA.VS.A8QM.01	cesc	0.4156	131.752	23.6904
						TCGA.VS.A94W.01	cesc	43.1068	83.4951	900.582
						TCGA.VS.A94X.01	cesc	3063.95	1915.46	1168.64
						TCGA.VS.A94Y.01	cesc	9.4062	2151.09	995.297
						TCGA.VS.A94Z.01	cesc	7.5821	368.155	64.8694
						TCGA.VS.A950.01	cesc	3.9707	1220.5	255.119
						TCGA.VS.A952.01	cesc	16.4349	811.209	1163.93
						TCGA.VS.A953.01	cesc	0	2757.4	7.8451
						TCGA.VS.A954.01	cesc	0	314.231	24.1321
						TCGA.VS.A957.01	cesc	2.7907	34.4186	6.5116
						TCGA.VS.A958.01	cesc	856.715	1413.07	374.101
						TCGA.VS.A959.01	cesc	249.685	237.736	792.453
						TCGA.VS.A9U5.01	cesc	194.898	2241.33	940.052
						TCGA.VS.A9U6.01	cesc	2976.71	1800.43	1220.71
						TCGA.VS.A9U7.01	cesc	1.7401	2654	24.0719
						TCGA.VS.A9UB.01	cesc	779.671	2006.7	718.807
						TCGA.VS.A9UC.01	cesc	547.259	931.916	9.0084
						TCGA.VS.A9UD.01	cesc	66.6667	20.1754	472.807
						TCGA.VS.A9UH.01	cesc	448.19	1029.35	249.313
						TCGA.VS.A9UI.01	cesc	0.7019	868.924	9.1244
						TCGA.VS.A9UJ.01	cesc	6.3328	1469.78	1140.47
						TCGA.VS.A9UL.01	cesc	22.4172	78.46	252.924
						TCGA.VS.A9UM.01	cesc	0.5356	41.2426	80.3428
						TCGA.VS.A9UO.01	cesc	228.047	30.5917	36.9881
						TCGA.VS.A9UP.01	cesc	1670.37	1834.18	687.563
						TCGA.VS.A9UQ.01	cesc	199.826	3007.84	79.2338
						TCGA.VS.A9UR.01	cesc	16.475	1645	530.195
						TCGA.VS.A9UT.01	cesc	320.663	1093.3	5120.25
						TCGA.VS.A9UU.01	cesc	9.3823	113.37	188.429
						TCGA.VS.A9UV.01	cesc	24.3408	87.0859	161.731
						TCGA.VS.A9UY.01	cesc	2.7162	1457.67	727.479
						TCGA.VS.A9UZ.01	cesc	662.897	721.056	691.438
						TCGA.VS.A9V0.01	cesc	71.4286	2975.24	2581.9
						TCGA.VS.A9V1.01	cesc	5.6101	638.85	3.5063
						TCGA.VS.A9V2.01	cesc	0	934.043	4.8285
						TCGA.VS.A9V3.01	cesc	406.121	794.585	17.6574
						TCGA.VS.A9V4.01	cesc	3168.21	3468.85	283.503
						TCGA.VS.A9V5.01	cesc	1558.96	1348.51	1298.18
						TCGA.VS.AA62.01	cesc	3.0053	2178.31	37.5657
						TCGA.WL.A834.01	cesc	13.1195	2979.59	494.655
						TCGA.XS.A8TJ.01	cesc	0	429.931	932.292
						TCGA.ZJ.A8QO.01	cesc	17.827	39.9325	729.481
						TCGA.ZJ.A8QQ.01	cesc	71.8016	943.429	953.873
						TCGA.ZJ.A8QR.01	cesc	7.4468	1401.06	3.1915
						TCGA.ZJ.AAX4.01	cesc	1.8371	293.325	8.5732
						TCGA.ZJ.AAX8.01	cesc	6.6528	331.393	697.297
						TCGA.ZJ.AAXA.01	cesc	0.3807	29.5013	723.449
						TCGA.ZJ.AAXB.01	cesc	20.0451	949.136	696.567
						TCGA.ZJ.AAXD.01	cesc	0.9166	199.817	100.825
						TCGA.ZJ.AAXF.01	cesc	73.9247	114.919	454.973
						TCGA.ZJ.AAXI.01	cesc	0	5.5402	46.3989
						TCGA.ZJ.AAXJ.01	cesc	154.496	617.984	1152.28
						TCGA.ZJ.AAXN.01	cesc	2.0911	1208.65	25.8773
						TCGA.ZJ.AAXT.01	cesc	5.9778	810.418	49.5303
						TCGA.ZJ.AAXU.01	cesc	13.9211	460.723	224.395
						TCGA.ZJ.AB0H.01	cesc	9.7087	785.801	746.359
						TCGA.ZJ.AB0I.01	cesc	136.804	2129.54	478.208
						TCGA.ZX.AA5X.01	cesc	0.7734	387.471	13.9211
						TCGA.3X.AAV9.01	chol	521.502	1606.97	467.61
						TCGA.3X.AAVA.01	chol	4.0023	505.432	72.6129
						TCGA.3X.AAVB.01	chol	4.862	511.973	346.663
						TCGA.3X.AAVC.01	chol	262.706	735.795	2651.59
						TCGA.3X.AAVE.01	chol	12.3983	133.282	276.895
						TCGA.4G.AAZO.01	chol	51.5464	1119.42	23.1959
						TCGA.4G.AAZT.01	chol	118.487	655.628	13.3678
						TCGA.W5.AA2G.01	chol	0	590.456	130.572
						TCGA.W5.AA2H.01	chol	16.2297	55.5556	44.9438
						TCGA.W5.AA2I.01	chol	266.226	524.639	121.995
						TCGA.W5.AA2O.01	chol	6.9968	485.468	372.443
						TCGA.W5.AA2Q.01	chol	0	81.8838	8.0611
						TCGA.W5.AA2R.01	chol	4.1633	36.0819	24.0546
						TCGA.W5.AA2T.01	chol	605.327	528.814	21.7918
						TCGA.W5.AA2U.01	chol	156.633	409.137	325.869
						TCGA.W5.AA2W.01	chol	7.9946	330.444	14.3903
						TCGA.W5.AA2X.01	chol	1895.65	398.52	156.142
						TCGA.W5.AA2Z.01	chol	138.085	457.906	422.272
						TCGA.W5.AA30.01	chol	325.024	606.061	72.3363
						TCGA.W5.AA31.01	chol	2279	800.518	204.758
						TCGA.W5.AA33.01	chol	60.2753	97.7693	96.3455
						TCGA.W5.AA34.01	chol	2.5667	796.201	14.3737
						TCGA.W5.AA36.01	chol	0	437.212	66.8203
						TCGA.W5.AA38.01	chol	121.641	11.236	691.744
						TCGA.W5.AA39.01	chol	9.3132	286.38	238.65
						TCGA.W6.AA0S.01	chol	9.0058	1477.9	276.336
						TCGA.WD.A7RX.01	chol	279.702	432.885	146.909
						TCGA.YR.A95A.01	chol	0.5767	547.289	16.7243
						TCGA.ZD.A8I3.01	chol	813.107	685.922	56.7961
						TCGA.ZH.A8Y1.01	chol	1.6866	445.826	10.6818
						TCGA.ZH.A8Y2.01	chol	676.189	334.95	1217.66
						TCGA.ZH.A8Y4.01	chol	609.496	309.593	422.481
						TCGA.ZH.A8Y5.01	chol	111.41	362.245	10.0985
						TCGA.ZH.A8Y6.01	chol	0.3753	601.557	3.7527
						TCGA.ZH.A8Y8.01	chol	118.519	560.082	403.292
						TCGA.ZU.A8S4.01	chol	22.4355	1116.79	126.137
						TCGA.02.0047.01	gbm	0.6146	210.209	275.362
						TCGA.02.0055.01	gbm	163.7	425.508	205.746
						TCGA.02.2483.01	gbm	0.8443	220.369	699.103
						TCGA.02.2485.01	gbm	0.9524	69.0476	514.286
						TCGA.02.2486.01	gbm	0	661.585	58.5366
						TCGA.06.0125.01	gbm	2.0371	765.94	424.934
						TCGA.06.0125.02	gbm	4.6814	223.147	162.809
						TCGA.06.0129.01	gbm	25.1349	364.663	881.371
						TCGA.06.0130.01	gbm	0	240.846	352.243
						TCGA.06.0132.01	gbm	0.6031	26.538	68.7575
						TCGA.06.0138.01	gbm	42.1562	162.405	589.495
						TCGA.06.0141.01	gbm	7.1869	103.183	101.643
						TCGA.06.0152.02	gbm	2.1882	1115.12	516.858
						TCGA.06.0156.01	gbm	0	108.713	663.206
						TCGA.06.0157.01	gbm	0.4834	113.595	598.912
						TCGA.06.0158.01	gbm	0	427.172	263.789
						TCGA.06.0168.01	gbm	4.5872	68.8073	20.6422
						TCGA.06.0171.02	gbm	9.1638	161.283	121.42
						TCGA.06.0174.01	gbm	8.0686	310.64	1039.84
						TCGA.06.0178.01	gbm	0	92.2545	215.26
						TCGA.06.0184.01	gbm	0.4904	75.0368	76.9985
						TCGA.06.0187.01	gbm	39.2974	289.693	377.86
						TCGA.06.0190.01	gbm	43.5562	299.931	807.719
						TCGA.06.0190.02	gbm	8.8693	599.229	451.778
						TCGA.06.0210.01	gbm	3.8722	723.136	1108.91
						TCGA.06.0210.02	gbm	1.9427	366.197	550.267
						TCGA.06.0211.01	gbm	0	690.178	1440.67
						TCGA.06.0211.02	gbm	0.5336	456.243	707.577
						TCGA.06.0219.01	gbm	1.3048	8.4815	439.08
						TCGA.06.0221.02	gbm	1.0025	18.0451	628.571
						TCGA.06.0238.01	gbm	9.2272	477.509	895.04
						TCGA.06.0644.01	gbm	72.4336	867.81	858.524
						TCGA.06.0645.01	gbm	2.091	55.4104	391.532
						TCGA.06.0646.01	gbm	2.0069	41.6434	57.197
						TCGA.06.0649.01	gbm	14.8988	244.858	402.267
						TCGA.06.0686.01	gbm	11.0988	739.179	936.737
						TCGA.06.0743.01	gbm	3.7096	270.27	313.195
						TCGA.06.0744.01	gbm	1.0802	587.081	403.45
						TCGA.06.0745.01	gbm	0	150.191	428.511
						TCGA.06.0747.01	gbm	0.4538	488.712	186.954
						TCGA.06.0749.01	gbm	0.5688	11.3766	68.8282
						TCGA.06.0750.01	gbm	2.7281	115.127	152.776
						TCGA.06.0878.01	gbm	5.2996	552.22	435.628
						TCGA.06.0882.01	gbm	0	542.532	156.283
						TCGA.06.1804.01	gbm	0.9213	40.539	47.9097
						TCGA.06.2557.01	gbm	0	18.6896	902.087
						TCGA.06.2558.01	gbm	0.5051	136.364	704.04
						TCGA.06.2559.01	gbm	6.2959	30.4302	666.317
						TCGA.06.2561.01	gbm	0.5634	462.535	357.747
						TCGA.06.2562.01	gbm	10.7479	897.895	474.25
						TCGA.06.2563.01	gbm	0	305.369	1874.22
						TCGA.06.2564.01	gbm	0.4001	143.224	942.959
						TCGA.06.2565.01	gbm	0.4252	101.191	1414.12
						TCGA.06.2567.01	gbm	2.5502	4.2503	50.5791
						TCGA.06.2569.01	gbm	612.625	2167.32	2043.19
						TCGA.06.2570.01	gbm	0.4857	133.576	849.545
						TCGA.06.5408.01	gbm	16.7863	311.43	516.841
						TCGA.06.5410.01	gbm	0.5114	86.9343	48.5809
						TCGA.06.5411.01	gbm	0.4604	74.1252	267.035
						TCGA.06.5412.01	gbm	0	73.132	724.43
						TCGA.06.5413.01	gbm	4.7037	87.4882	605.362
						TCGA.06.5414.01	gbm	0.7846	826.991	528.05
						TCGA.06.5415.01	gbm	0	359.304	247.431
						TCGA.06.5416.01	gbm	1.4892	322.413	411.765
						TCGA.06.5417.01	gbm	0	15.2672	108.779
						TCGA.06.5418.01	gbm	0.4963	208.441	271.47
						TCGA.06.5856.01	gbm	1.444	137.183	941.986
						TCGA.06.5858.01	gbm	3.6463	98.9061	169.097
						TCGA.06.5859.01	gbm	0	17.8273	288.802
[truncated: 4,273 more rows]

## Sheet: Fig 1C
Cell number (x104)
HCC-1419							NCI-H2029							MEFs
Experiment 1	Day 1	Day 2	Day 3	Day 4	Day 5		Experiment 1	Day 1	Day 2	Day 3	Day 4	Day 5		Experiment 1	Day 1	Day 2	Day 3	Day 4	Day 5
None	1.02	1.52	3.29	7.27	14.85		None	1.03	1.64	3.38	5.47	9.07		None	1.03	1.23	1.57	2.25	3.45
2 X	0.98	1.98	3.54	7.86	16.48		2 X	0.97	2.08	3.53	6.08	9.54		2 X	1.02	1.22	1.69	2.38	3.57
4 X	0.96	2.11	4.83	10.72	19.86		4 X	1.01	2.34	4.55	7.24	12.28		4 X	0.96	1.31	1.88	2.69	4.16
8 X	1.04	3.13	6.46	13.34	27.93		8 X	1.02	2.84	5.28	8.94	15.22		8 X	1.02	1.37	1.98	2.98	5.28
Experiment 2							Experiment 2							Experiment 2
None	1	1.61	3.43	7.36	15.14		None	1.01	1.46	3.24	5.34	8.78		None	1.03	1.06	1.44	2.06	3.16
2 X	0.97	2.05	3.65	8.03	16.58		2 X	0.96	1.91	3.28	5.82	9.34		2 X	0.98	1.08	1.54	2.17	3.32
4 X	1.02	2.34	5.04	10.86	20.31		4 X	0.98	2.04	4.36	6.87	11.94		4 X	1.02	1.08	1.69	2.35	3.89
8 X	1.04	3.16	6.78	13.65	28.06		8 X	1.02	2.65	5.07	8.77	15.05		8 X	0.96	1.24	1.82	2.84	5.07
Experiment 3							Experiment 3							Experiment 3
None	1.03	1.77	3.54	7.52	15.55		None	0.99	1.74	3.51	5.56	9.22		None	1.02	1.35	1.74	2.46	3.66
2 X	0.95	2.18	3.68	8.27	16.96		2 X	1.01	2.14	3.66	6.21	9.86		2 X	0.96	1.41	1.85	2.48	3.84
4 X	1.02	2.68	5.02	10.92	20.53		4 X	1.03	2.48	4.71	7.42	12.48		4 X	0.98	1.49	1.97	2.83	4.38
8 X	0.96	3.26	7.24	13.94	28.52		8 X	0.97	2.93	5.45	9.31	15.61		8 X	1	1.51	2.12	3.22	5.52
Average (x104)	Day 1	Day 2	Day 3	Day 4	Day 5		Average (x104)	Day 1	Day 2	Day 3	Day 4	Day 5		Average (x104)	Day 1	Day 2	Day 3	Day 4	Day 5
None	1.01667	1.63333	3.42	7.38333	15.18		None	1.01	1.61333	3.37667	5.45667	9.02333		None	1.02667	1.21333	1.58333	2.25667	3.42333
2 X	0.966667	2.07	3.62333	8.05333	16.6733		2 X	0.98	2.04333	3.49	6.03667	9.58		2 X	0.986667	1.23667	1.69333	2.34333	3.57667
4 X	1	2.37667	4.96333	10.8333	20.2333		4 X	1.00667	2.28667	4.54	7.17667	12.2333		4 X	0.986667	1.29333	1.84667	2.62333	4.14333
8 X	1.01333	3.18333	6.82667	13.6433	28.17		8 X	1.00333	2.80667	5.26667	9.00667	15.2933		8 X	0.993333	1.37333	1.97333	3.01333	5.29
Stdev (x104)							Stdev (x104)							Stdev (x104)
None	0.0152753	0.126623	0.1253	0.126623	0.35171		None	0.02	0.141892	0.135031	0.110604	0.223681		None	0.0057735	0.145717	0.150444	0.200083	0.251064
2 X	0.0152753	0.101489	0.0737111	0.205994	0.253246		2 X	0.0264575	0.119304	0.193132	0.198578	0.262298		2 X	0.0305505	0.16563	0.155027	0.158219	0.260064
4 X	0.034641	0.286764	0.115902	0.102632	0.341516		4 X	0.0251661	0.224796	0.175214	0.280416	0.273008		4 X	0.0305505	0.205508	0.142945	0.246847	0.245425
8 X	0.046188	0.0680686	0.392088	0.300056	0.31		8 X	0.0288675	0.142945	0.190351	0.276104	0.287112		8 X	0.0305505	0.135031	0.150111	0.19218	0.225167
P vale							P vale							P vale
None and 2 X		0.2162					None and 2 X		0.2611					None and 2 X		0.1056
None and 4 X		0.00147					None and 4 X		0.001206					None and 4 X		0.03029
None and 8 X		0.001206					None and 8 X		0.001617					None and 8 X		0.002158

## Sheet: Fig 1D
Hep3B								Hela
Experiment 1	Day 1	Day 2	Day 3	Day 4	Day 5			Experiment 1	Day 1	Day 2	Day 3	Day 4	Day 5
control	0.97	1.88	5.22	12.27	27.75			control	1.02	1.65	3.89	8.66	18.55
CRISPR IMP2	1.03	1.36	2.77	4.68	7.32			CRISPR IMP2	1.01	1.32	2.02	3.51	4.71
Experiment 2								Experiment 2
control	1.01	2.05	5.44	12.51	27.72			control	0.98	1.81	3.97	8.84	18.62
CRISPR IMP2	0.98	1.43	2.85	4.73	7.46			CRISPR IMP2	1.01	1.47	2.15	3.58	4.89
Experiment 3								Experiment 3
control	1.01	1.97	5.31	12.61	28.06			control	1.02	2.06	4.21	9.17	19.06
CRISPR IMP2	0.98	1.57	3.06	4.87	7.58			CRISPR IMP2	1.03	1.51	2.38	3.92	5.08
Average (x104)	Day 1	Day 2	Day 3	Day 4	Day 5			Average (x104)	Day 1	Day 2	Day 3	Day 4	Day 5
control	0.996667	1.96667	5.32333	12.4633	27.8433			control	1.00667	1.84	4.02333	8.89	18.7433
CRISPR IMP2	0.996667	1.45333	2.89333	4.76	7.45333			CRISPR IMP2	1.01667	1.43333	2.18333	3.67	4.89333
Stdev (x104)								Stdev (x104)
control	0.023094	0.085049	0.110604	0.174738	0.188237			control	0.023094	0.20664	0.166533	0.25865	0.276466
CRISPR IMP2	0.0288675	0.106927	0.149778	0.0984886	0.130128			CRISPR IMP2	0.011547	0.100167	0.1823	0.219317	0.185023
p Value	0.001204							p Value	0.001617
RD								HCC-1359
Experiment 1	Day 1	Day 2	Day 3	Day 4	Day 5			Experiment 1	Day 1	Day 2	Day 3	Day 4	Day 5
control	1.01	1.48	2.85	5.89	13.38			control	1.01	1.68	3.03	5.84	11.85
CRISPR IMP2	1.03	1.13	1.52	2.95	4.17			CRISPR IMP2	0.98	1.13	1.83	2.94	4.86
Experiment 2								Experiment 2
control	0.98	1.63	2.92	6.06	13.54			control	0.99	1.56	2.84	5.98	12.03
CRISPR IMP2	1.01	1.24	1.65	2.94	4.32			CRISPR IMP2	1.02	1.21	2.01	2.97	5.22
Experiment 3								Experiment 3
control	1.03	1.82	3.12	6.12	13.77			control	1.01	1.78	3.18	6.12	12.24
CRISPR IMP2	1.02	1.34	1.84	3.15	4.48			CRISPR IMP2	1.02	1.37	2.11	3.32	5.24
Average (x104)	Day 1	Day 2	Day 3	Day 4	Day 5			Average (x104)	Day 1	Day 2	Day 3	Day 4	Day 5
control	1.00667	1.64333	2.96333	6.02333	13.5633			control	1.00333	1.67333	3.01667	5.98	12.04
CRISPR IMP2	1.02	1.23667	1.67	3.01333	4.32333			CRISPR IMP2	1.00667	1.23667	1.98333	3.07667	5.10667
Stdev (x104)								Stdev (x104)
control	0.0251661	0.170392	0.140119	0.119304	0.196044			control	0.011547	0.110151	0.170392	0.14	0.195192
CRISPR IMP2	0.01	0.10504	0.160935	0.118462	0.155027			CRISPR IMP2	0.023094	0.122202	0.141892	0.211266	0.213854
P value	0.001786							P value	0.001329
MB-231								SNU-423
Experiment 1	Day 1	Day 2	Day 3	Day 4	Day 5			Experiment 1	Day 1	Day 2	Day 3	Day 4	Day 5
control	1.01	1.07	1.86	3.01	4.39			control	1.03	1.21	1.84	2.34	3.16
CRISPR IMP2	0.97	1.02	1.25	1.53	1.94			CRISPR IMP2	0.97	1.11	1.32	1.61	1.95
Experiment 2								Experiment 2
control	1.02	1.24	2.05	3.15	4.58			control	1.01	1.32	1.92	2.41	3.18
CRISPR IMP2	1..03	1.06	1.33	1.66	2.15			CRISPR IMP2	0.96	1.19	1.36	1.78	2.02
Experiment 3								Experiment 3
control	0.98	1.38	2.13	3.34	4.71			control	0.99	1.42	2.05	2.53	3.42
CRISPR IMP2	0.98	1.12	1.43	1.75	2.24			CRISPR IMP2	1.01	1.37	1.58	1.89	2.25
Average (x104)	Day 1	Day 2	Day 3	Day 4	Day 5			Average (x104)	Day 1	Day 2	Day 3	Day 4	Day 5
control	1.00333	1.23	2.01333	3.16667	4.56			control	1.01	1.31667	1.93667	2.42667	3.25333
CRISPR IMP2	0.975	1.06667	1.33667	1.64667	2.11			CRISPR IMP2	0.98	1.22333	1.42	1.76	2.07333
Stdev (x104)								Stdev (x104)
control	0.0208167	0.155242	0.138684	0.16563	0.160935			control	0.02	0.10504	0.105987	0.0960902	0.144684
CRISPR IMP2	0.00707107	0.0503322	0.090185	0.110604	0.153948			CRISPR IMP2	0.0264575	0.133167	0.14	0.141067	0.15695
P value	0.001225							P value	0.0008054

## Sheet: Fig 1E
MEF Cell number (104)
Experiment 1	Day 1	Day 2	Day 3	Day 4	Day 5
WT 1	1	1.39	2.16	3.73	6.45
KO 1	1	1.12	1.59	1.95	2.25
Experiment 2
WT 2	1	1.46	2.43	4	6.05
KO 2	1	1.08	1.29	1.52	1.84
Experiment 3
WT 3	1	1.53	2.61	4.08	6.36
KO 3	1	1.26	1.69	1.92	2.26
Experiment 4
WT 4	1	1.64	2.78	4.36	6.28
KO 4	1	1.02	1.19	1.47	1.72
Experiment 5
WT 5	1	1.58	2.51	4.28	6.36
KO 5	1	1.02	1.24	1.58	2.05
Average
WT	1	1.52	2.498	4.09	6.3
KO	1	1.1	1.4	1.688	2.024
Stdev
WT	0	0.0982344	0.229717	0.248395	0.152151
KO	0	0.0989949	0.224722	0.229063	0.241723
MEF Cell number (104)
	Day 1	Day 2	Day 3	Day 4	Day 5
WT	1	1.39	2.16	3.73	6.45
	1	1.46	2.43	4	6.05
	1	1.53	2.61	4.08	6.36
	1	1.64	2.78	4.36	6.28
	1	1.58	2.51	4.28	6.36
KO	1	1.12	1.59	1.95	2.25
	1	1.08	1.29	1.52	1.84
	1	1.26	1.69	1.92	2.26
	1	1.02	1.19	1.47	1.72
	1	1.02	1.24	1.58	2.05
P value	0	0.000147492	6.08851e-05	2.62966e-07	9.55189e-09

## Sheet: Fig 1F
IGF2 (ng/ml)
	WT	KO				WT	KO
Experiment 1	136.6	106.4			Average	128.04	106.02
Experiment 2	135.7	121.2
Experiment 3	132.9	104.1			Stdev	10.6322	9.0555
Experiment 4	111.4	99.8
Experiment 5	123.6	98.6			P Vaule	0.00809997

## Sheet: Fig 1G
Cell number (104)
Experiment 1	WT	KO
BSA	1.86	1.14
0	1.86	1.13
10	2.01	1.24
100	2.16	1.28
500	2.33	1.36		Average	WT	KO	Stdev	WT	KO	P Value
1000	2.38	1.38		BSA	1.995	1.19		0.127148	0.090185		0
Experiment 2				0	1.9975	1.1975		0.132508	0.0727438		0.8934
BSA	2.15	1.32		10	2.1775	1.3125		0.129454	0.118145		0.2029
0	2.09	1.29		100	2.31	1.39		0.128323	0.114018		0.0983
10	2.24	1.48		500	2.43	1.5025		0.139284	0.124466		0.1583
100	2.33	1.52		1000	2.44	1.4775		0.152534	0.0991211		0.0434
500	2.42	1.63
1000	2.41	1.59
Experiment 3
BSA	1.93	1.12
0	1.91	1.15
10	2.15	1.22
100	2.28	1.31
500	2.34	1.44
1000	2.31	1.41
Experiment 4
BSA	2.04	1.18
0	2.13	1.22
10	2.31	1.31
100	2.47	1.45
500	2.63	1.58
1000	2.66	1.53
