# Supplementary material for: IGF2 mRNA binding protein-2 is a tumor promoter that drives cancer proliferation through its client mRNAs IGF2 and HMGA1
Source: eLife journal article supplement (doi:10.7554/elife.27155), 2017-07-28
Supplement: supp [file elife_poa_e27155_Fig.2_Source_Data_File.xlsx]

## Sheet: Fig 2D 
Experiment 1	Day 1	Day 2	Day 3	Day 4	Day 5	Day 6	Day 7		Experiment 1	Day 1	Day 2	Day 3	Day 4	Day 5	Day 6	Day 7
IMP2 +/+; shRNA P21; DMSO	0.97	1.01	1.28	1.84	3.02	5.55	9.94		IMP2 +/+; shRNA IGFBP2; shRNA GRB14;DMSO	0.98	1.04	1.26	2.43	3.75	5.96	10.47
IMP2 -/-; shRNA P21; DMSO	0.98	1.01	1.15	1.31	1.32	1.93	2.83		IMP2 -/-; shRNA IGFBP2; shRNA GRB14;DMSO	1.01	1.11	1.17	1.35	1.68	2.33	3.34
IMP2 +/+; shRNA P21; Doxycycline	1.01	1.08	1.46	2.25	3.86	6.89	12.98		IMP2 +/+; shRNA IGFBP2; shRNA GRB14; Doxycycline	0.99	1.05	1.42	2.56	4.12	7.38	13.01
IMP2 -/-; shRNA P21; Doxycycline	0.98	1.03	1.18	1.34	1.68	2.36	3.51		IMP2 -/-; shRNA IGFBP2; shRNA GRB14; Doxycycline	1.02	1.09	1.52	2.37	3.68	6.06	10.19
Experiment 2									Experiment 2
IMP2 +/+; shRNA P21; DMSO	1.02	1.01	1.31	1.93	3.07	5.53	10.12		IMP2 +/+; shRNA IGFBP2; shRNA GRB14;DMSO	1.02	1.12	1.64	2.42	3.64	6.19	10.39
IMP2 -/-; shRNA P21; DMSO	1.01	1.02	1.17	1.41	1.53	2.07	2.95		IMP2 -/-; shRNA IGFBP2; shRNA GRB14;DMSO	1.02	1.08	1.14	1.42	1.56	2.34	3.55
IMP2 +/+; shRNA P21; Doxycycline	0.98	1.1	1.48	2.47	3.95	7.07	13.11		IMP2 +/+; shRNA IGFBP2; shRNA GRB14; Doxycycline	1.03	1.08	1.33	2.65	4.28	7.47	13.15
IMP2 -/-; shRNA P21; Doxycycline	1.02	1.05	1.24	1.58	1.77	2.48	3.68		IMP2 -/-; shRNA IGFBP2; shRNA GRB14; Doxycycline	0.98	1.11	1.36	2.28	3.62	6.24	10.06
Experiment 3									Experiment 3
IMP2 +/+; shRNA P21; DMSO	0.98	1.01	1.38	1.97	3.17	5.67	10.22		IMP2 +/+; shRNA IGFBP2; shRNA GRB14;DMSO	0.99	1.11	1.48	2.19	3.45	6.09	10.58
IMP2 -/-; shRNA P21; DMSO	0.99	1.03	1.19	1.36	1.56	2.22	3.03		IMP2 -/-; shRNA IGFBP2; shRNA GRB14;DMSO	1.01	1.08	1.19	1.48	1.64	2.12	3.53
IMP2 +/+; shRNA P21; Doxycycline	1.02	1.1	1.51	2.36	4.11	7.14	13.28		IMP2 +/+; shRNA IGFBP2; shRNA GRB14; Doxycycline	0.99	1.07	1.51	2.68	4.11	7.73	13.16
IMP2 -/-; shRNA P21; Doxycycline	1.01	1.04	1.21	1.46	1.83	2.58	3.73		IMP2 -/-; shRNA IGFBP2; shRNA GRB14; Doxycycline	1.01	1.07	1.26	2.15	3.75	6.28	9.92
Average									Average
IMP2 +/+; shRNA P21; DMSO	0.99	1.01	1.32333	1.91333	3.08667	5.58333	10.0933		IMP2 +/+; shRNA IGFBP2; shRNA GRB14;DMSO	0.996667	1.09	1.46	2.34667	3.61333	6.08	10.48
IMP2 -/-; shRNA P21; DMSO	0.993333	1.02	1.17	1.36	1.47	2.07333	2.93667		IMP2 -/-; shRNA IGFBP2; shRNA GRB14;DMSO	1.01333	1.09	1.16667	1.41667	1.62667	2.26333	3.47333
IMP2 +/+; shRNA P21; Doxycycline	1.00333	1.09333	1.48333	2.36	3.97333	7.03333	13.1233		IMP2 +/+; shRNA IGFBP2; shRNA GRB14; Doxycycline	1.00333	1.06667	1.42	2.63	4.17	7.52667	13.1067
IMP2 -/-; shRNA P21; Doxycycline	1.00333	1.04	1.21	1.46	1.76	2.47333	3.64		IMP2 -/-; shRNA IGFBP2; shRNA GRB14; Doxycycline	1.00333	1.09	1.38	2.26667	3.68333	6.19333	10.0567
Stdev									Stdev
IMP2 +/+; shRNA P21; DMSO	0.0264575	0	0.051316	0.0665833	0.0763763	0.0757188	0.141892		IMP2 +/+; shRNA IGFBP2; shRNA GRB14;DMSO	0.0208167	0.043589	0.190788	0.135769	0.151767	0.115326	0.0953939
IMP2 -/-; shRNA P21; DMSO	0.0152753	0.01	0.02	0.05	0.130767	0.145029	0.100664		IMP2 -/-; shRNA IGFBP2; shRNA GRB14;DMSO	0.0057735	0.0173205	0.0251661	0.0650641	0.061101	0.124231	0.115902
IMP2 +/+; shRNA P21; Doxycycline	0.0208167	0.011547	0.0251661	0.11	0.126623	0.12897	0.150444		IMP2 +/+; shRNA IGFBP2; shRNA GRB14; Doxycycline	0.023094	0.0152753	0.09	0.06245	0.0953939	0.181751	0.083865
IMP2 -/-; shRNA P21; Doxycycline	0.0208167	0.01	0.03	0.12	0.0754983	0.110151	0.115326		IMP2 -/-; shRNA IGFBP2; shRNA GRB14; Doxycycline	0.0208167	0.02	0.131149	0.110604	0.0650641	0.117189	0.135031
p Value									p Value
IMP2 +/+; shRNA P21; DMSO/Doxycycline		1.43e-05							IMP2 +/+; shRNA IGFBP2;GRB14 DMSO/Doxycycline		3.62e-06
IMP2 -/-; shRNA P21; DMSO/Doxycycline		0.127							IMP2 -/-; shRNA IGFBP2;GRB14 DMSO/Doxycycline		3.55e-08
Experiment 1	Day 1	Day 2	Day 3	Day 4	Day 5	Day 6	Day 7		Experiment 1	Day 1	Day 2	Day 3	Day 4	Day 5	Day 6	Day 7
IMP2 +/+; shRNA IGFBP2; DMSO	1.02	1.12	1.46	1.97	3.56	5.92	10.12		IMP2 +/+; shRNA GRB14; DMSO	1.02	1.02	1.42	2.25	3.56	6.18	10.32
IMP2 -/-; shRNA IGFBP2; DMSO	1.01	1.05	1.24	1.44	1.59	2.26	3.32		IMP2 -/-; shRNA GRB14; DMSO	1.01	1.05	1.34	1.53	1.68	2.46	3.54
IMP2 +/+; shRNA IGFBP2; Doxycycline	0.98	1.14	1.6	2.56	4.06	7.24	11.92		IMP2 +/+; shRNA GRB14; Doxycycline	0.97	1.08	1.31	2.25	3.02	5.81	9.63
IMP2 -/-; shRNA IGFBP2; Doxycycline	0.96	1.08	1.37	1.98	2.78	4.58	8.18		IMP2 -/-; shRNA GRB14; Doxycycline	0.98	1.06	1.32	2.12	2.85	4.54	8.02
Experiment 2									Experiment 2
IMP2 +/+; shRNA IGFBP2; DMSO	1.01	1.11	1.44	2.15	3.43	5.82	10.03		IMP2 +/+; shRNA GRB14; DMSO	1.02	1.02	1.42	2.33	3.62	5.91	10.54
IMP2 -/-; shRNA IGFBP2; DMSO	0.96	1.04	1.19	1.63	1.66	2.15	3.27		IMP2 -/-; shRNA GRB14; DMSO	0.98	1.07	1.47	1.46	1.75	2.52	3.62
IMP2 +/+; shRNA IGFBP2; Doxycycline	1.02	1.16	1.42	2.62	4.05	6.92	11.82		IMP2 +/+; shRNA GRB14; Doxycycline	1.01	1.12	1.46	2.03	3.08	5.89	9.39
IMP2 -/-; shRNA IGFBP2; Doxycycline	0.98	1.06	1.38	1.84	2.56	4.52	7.91		IMP2 -/-; shRNA GRB14; Doxycycline	0.99	1.07	1.39	2.32	2.97	4.47	7.93
Experiment 3									Experiment 3
IMP2 +/+; shRNA IGFBP2; DMSO	1.02	1.09	1.42	2.42	3.34	6.03	10.06		IMP2 +/+; shRNA GRB14; DMSO	1	1.02	1.64	2.11	3.54	6.12	10.07
IMP2 -/-; shRNA IGFBP2; DMSO	0.98	1.07	1.23	1.28	1.53	2.22	3.11		IMP2 -/-; shRNA GRB14; DMSO	1.01	1.06	1.05	1.54	1.58	2.32	3.43
IMP2 +/+; shRNA IGFBP2; Doxycycline	1.01	1.18	1.46	2.3	3.84	7.02	11.84		IMP2 +/+; shRNA GRB14; Doxycycline	0.97	1.07	1.46	2.14	2.96	6.02	9.34
IMP2 -/-; shRNA IGFBP2; Doxycycline	1	1.14	1.27	1.78	2.53	4.34	8.12		IMP2 -/-; shRNA GRB14; Doxycycline	1.02	1.09	1.22	1.98	2.72	4.82	7.87
Average									Average
IMP2 +/+; shRNA IGFBP2; DMSO	1.01667	1.10667	1.44	2.18	3.44333	5.92333	10.07		IMP2 +/+; shRNA GRB14; DMSO	1.01333	1.02	1.49333	2.23	3.57333	6.07	10.31
IMP2 -/-; shRNA IGFBP2; DMSO	0.983333	1.05333	1.22	1.45	1.59333	2.21	3.23333		IMP2 -/-; shRNA GRB14; DMSO	1	1.06	1.28667	1.51	1.67	2.43333	3.53
IMP2 +/+; shRNA IGFBP2; Doxycycline	1.00333	1.16	1.49333	2.49333	3.98333	7.06	11.86		IMP2 +/+; shRNA GRB14; Doxycycline	0.983333	1.09	1.41	2.14	3.02	5.90667	9.45333
IMP2 -/-; shRNA IGFBP2; Doxycycline	0.98	1.09333	1.34	1.86667	2.62333	4.48	8.07		IMP2 -/-; shRNA GRB14; Doxycycline	0.996667	1.07333	1.31	2.14	2.84667	4.61	7.94
Stdev									Stdev
IMP2 +/+; shRNA IGFBP2; DMSO	0.0057735	0.0152753	0.02	0.226495	0.110604	0.10504	0.0458258		IMP2 +/+; shRNA GRB14; DMSO	0.011547	0	0.127017	0.111355	0.0416333	0.141774	0.23516
IMP2 -/-; shRNA IGFBP2; DMSO	0.0251661	0.0152753	0.0264575	0.175214	0.0650641	0.0556776	0.109697		IMP2 -/-; shRNA GRB14; DMSO	0.0173205	0.01	0.215019	0.043589	0.08544	0.102632	0.0953939
IMP2 +/+; shRNA IGFBP2; Doxycycline	0.0208167	0.02	0.0945163	0.170098	0.124231	0.163707	0.052915		IMP2 +/+; shRNA GRB14; Doxycycline	0.023094	0.0264575	0.0866025	0.11	0.06	0.105987	0.155027
IMP2 -/-; shRNA IGFBP2; Doxycycline	0.02	0.0416333	0.0608276	0.102632	0.136504	0.1249	0.141774		IMP2 -/-; shRNA GRB14; Doxycycline	0.0208167	0.0152753	0.08544	0.17088	0.125033	0.185203	0.0754983
p Value									p Value
IMP2 +/+; shRNA IGFBP2; DMSO/Doxycycline		1.93e-06							IMP2 +/+; shRNA GRB14; DMSO/Doxycycline		0.191
IMP2 -/-; shRNA IGFBP2; DMSO/Doxycycline		1.25e-06							IMP2 -/-; shRNA GRB14; DMSO/Doxycycline		5.85e-05

## Sheet: Fig 2E
Experiment 1	Day 1	Day 2	Day 3	Day 4	Day 5	Day 6	Day 7	IMP2-/-div by IMP2+/+		Experiment 1	Day 1	Day 2	Day 3	Day 4	Day 5	Day 6	Day 7	IMP2-/-div by IMP2+/+
IMP2 +/+; shRNA P21; DMSO	0.97	1.01	1.28	1.84	3.02	5.55	9.94			IMP2 +/+; shRNA IGFBP2; shRNA GRB14;DMSO	0.98	1.04	1.26	2.43	3.75	5.96	10.47
IMP2 -/-; shRNA P21; DMSO	0.98	1.01	1.15	1.36	1.32	1.93	2.83	0.206243		IMP2 -/-; shRNA IGFBP2; shRNA GRB14;DMSO	1.01	1.11	1.17	1.35	1.68	2.33	3.34	0.245522
IMP2 +/+; shRNA P21; Doxycycline	1.01	1.08	1.46	2.36	3.86	6.89	12.98			IMP2 +/+; shRNA IGFBP2; shRNA GRB14; Doxycycline	0.99	1.05	1.42	2.56	4.12	7.38	13.01
IMP2 -/-; shRNA P21; Doxycycline	0.98	1.03	1.18	1.46	1.68	2.36	3.51	0.211362		IMP2 -/-; shRNA IGFBP2; shRNA GRB14; Doxycycline	1.02	1.09	1.52	2.37	3.68	6.06	10.19	0.762895
Experiment 2										Experiment 2
IMP2 +/+; shRNA P21; DMSO	1.02	1.01	1.31	1.93	3.07	5.53	10.12			IMP2 +/+; shRNA IGFBP2; shRNA GRB14;DMSO	1.02	1.12	1.64	2.42	3.64	6.19	10.39
IMP2 -/-; shRNA P21; DMSO	1.01	1.02	1.17	1.36	1.53	2.07	2.95	0.213187		IMP2 -/-; shRNA IGFBP2; shRNA GRB14;DMSO	1.02	1.08	1.14	1.42	1.56	2.34	3.55	0.270011
IMP2 +/+; shRNA P21; Doxycycline	0.98	1.1	1.48	2.36	3.95	7.07	13.11			IMP2 +/+; shRNA IGFBP2; shRNA GRB14; Doxycycline	1.03	1.08	1.33	2.65	4.28	7.47	13.15
IMP2 -/-; shRNA P21; Doxycycline	1.02	1.05	1.24	1.46	1.77	2.48	3.68	0.219291		IMP2 -/-; shRNA IGFBP2; shRNA GRB14; Doxycycline	0.98	1.11	1.36	2.28	3.62	6.24	10.06	0.749175
Experiment 3										Experiment 3
IMP2 +/+; shRNA P21; DMSO	0.98	1.01	1.38	1.97	3.17	5.67	10.22			IMP2 +/+; shRNA IGFBP2; shRNA GRB14;DMSO	0.99	1.11	1.48	2.19	3.45	6.09	10.58
IMP2 -/-; shRNA P21; DMSO	0.99	1.03	1.19	1.36	1.56	2.22	3.03	0.220779		IMP2 -/-; shRNA IGFBP2; shRNA GRB14;DMSO	1.01	1.08	1.19	1.48	1.64	2.12	3.53	0.262774
IMP2 +/+; shRNA P21; Doxycycline	1.02	1.1	1.51	2.36	4.11	7.14	13.28			IMP2 +/+; shRNA IGFBP2; shRNA GRB14; Doxycycline	0.99	1.07	1.51	2.68	4.11	7.73	13.16
IMP2 -/-; shRNA P21; Doxycycline	1.01	1.04	1.21	1.46	1.83	2.58	3.73	0.22186		IMP2 -/-; shRNA IGFBP2; shRNA GRB14; Doxycycline	1.01	1.07	1.26	2.15	3.75	6.28	9.92	0.732128
Imp2-/- : % of similarly treated Imp2+/+				P Value						Imp2-/- : % of similarly treated Imp2+/+				P Value
Control	0.213403				0.5185					Control	0.259435				1.316e-06
p21	0.217504									Grb14/IGFBP2	0.748066
Experiment 1	Day 1	Day 2	Day 3	Day 4	Day 5	Day 6	Day 7			Experiment 1	Day 1	Day 2	Day 3	Day 4	Day 5	Day 6	Day 7
IMP2 +/+; shRNA IGFBP2; DMSO	1.02	1.12	1.46	1.97	3.56	5.92	10.12			IMP2 +/+; shRNA GRB14; DMSO	1.02	1.02	1.42	2.25	3.56	6.18	10.32
IMP2 -/-; shRNA IGFBP2; DMSO	1.01	1.05	1.24	1.44	1.59	2.26	3.32	0.253846		IMP2 -/-; shRNA GRB14; DMSO	1.01	1.05	1.34	1.53	1.68	2.46	3.54	0.272043
IMP2 +/+; shRNA IGFBP2; Doxycycline	0.98	1.14	1.6	2.56	4.06	7.24	11.92			IMP2 +/+; shRNA GRB14; Doxycycline	0.97	1.08	1.31	2.25	3.02	5.81	9.63
IMP2 -/-; shRNA IGFBP2; Doxycycline	0.96	1.08	1.37	1.98	2.78	4.58	8.18	0.659963		IMP2 -/-; shRNA GRB14; Doxycycline	0.98	1.06	1.32	2.12	2.85	4.54	8.02	0.812933
Experiment 2										Experiment 2
IMP2 +/+; shRNA IGFBP2; DMSO	1.01	1.11	1.44	2.15	3.43	5.82	10.03			IMP2 +/+; shRNA GRB14; DMSO	1.02	1.02	1.42	2.33	3.62	5.91	10.54
IMP2 -/-; shRNA IGFBP2; DMSO	0.96	1.04	1.19	1.63	1.66	2.15	3.27	0.256098		IMP2 -/-; shRNA GRB14; DMSO	0.98	1.07	1.47	1.46	1.75	2.52	3.62	0.277311
IMP2 +/+; shRNA IGFBP2; Doxycycline	1.02	1.16	1.42	2.62	4.05	6.92	11.82			IMP2 +/+; shRNA GRB14; Doxycycline	1.01	1.12	1.46	2.03	3.08	5.89	9.39
IMP2 -/-; shRNA IGFBP2; Doxycycline	0.98	1.06	1.38	1.84	2.56	4.52	7.91	0.641667		IMP2 -/-; shRNA GRB14; Doxycycline	0.99	1.07	1.39	2.32	2.97	4.47	7.93	0.828162
Experiment 3										Experiment 3
IMP2 +/+; shRNA IGFBP2; DMSO	1.02	1.09	1.42	2.42	3.34	6.03	10.06			IMP2 +/+; shRNA GRB14; DMSO	1	1.02	1.64	2.11	3.54	6.12	10.07
IMP2 -/-; shRNA IGFBP2; DMSO	0.98	1.07	1.23	1.28	1.53	2.22	3.11	0.235619		IMP2 -/-; shRNA GRB14; DMSO	1.01	1.06	1.05	1.54	1.58	2.32	3.43	0.266814
IMP2 +/+; shRNA IGFBP2; Doxycycline	1.01	1.18	1.46	2.3	3.84	7.02	11.84			IMP2 +/+; shRNA GRB14; Doxycycline	0.97	1.07	1.46	2.14	2.96	6.02	9.34
IMP2 -/-; shRNA IGFBP2; Doxycycline	1	1.14	1.27	1.78	2.53	4.34	8.12	0.657433		IMP2 -/-; shRNA GRB14; Doxycycline	1.02	1.09	1.22	1.98	2.72	4.82	7.87	0.818399
Imp2-/- : % of similarly treated Imp2+/+				P Value						Imp2-/- : % of similarly treated Imp2+/+				P Value
Control	0.248521				1.367e-06					Control	0.272056				1.326e-07
IGFBP2	0.653021									Grb14	0.819831
