# Supplementary material for: IGF2 mRNA binding protein-2 is a tumor promoter that drives cancer proliferation through its client mRNAs IGF2 and HMGA1
Source: eLife journal article supplement (doi:10.7554/elife.27155), 2017-07-28
Supplement: supp [file elife_poa_e27155_Fig.3_Source_Data_File.xlsx]

## Sheet: mRNA
:
Fig. 3A: Total mRNA	WT 1	KO 1	WT 2	KO 2	WT 3	KO 3
GRB14	21.52	23.23	21.44	23.28	21.39	23.28
IGFBP2	20.33	15.97	20.42	15.92	20.49	16.01
P21	20.46	22.15	20.45	22.27	20.44	22.38
GAPDH	18.34	18.41	18.54	18.42	18.56	18.59
Average	WT	KO		Stdev	WT	KO
GRB14	21.45	23.2633		GRB14	0.0655744	0.0288675
IGFBP2	20.4133	15.9667		IGFBP2	0.0802081	0.0450925
P21	20.45	22.2667		P21	0.01	0.115036
GAPDH	18.48	18.4733		GAPDH	0.121655	0.10116
Final	ΔCT	ΔΔCT	% KO of WT		P Vaule
GRB14	-1.81333	-1.82	0.283221			1.62e-06
IGFBP2	4.44667	4.44	21.7057			1.22e-07
P21	-1.81667	-1.82333	0.282567			1.08e-05
GAPDH	0.00666667
Fig. 3C: %mRNA Polysomal	WT1 Polysomal	WT1 total	KO1 polysomal	KO1 total	WT2 Polysomal	WT2 total	KO2 polysomal	KO2 total	WT3 Polysomal	WT3 total	KO3 polysomal	KO3 total
GRB14	23.33	21.52	23.69	23.23	23.21	21.44	23.75	23.28	23.16	21.39	23.75	23.28
IGFBP2	21.59	20.33	16.564	15.97	21.66	20.42	16.42	15.92	21.73	20.49	16.51	16.01
P21	22.06	20.46	23.72	22.15	22.78	20.45	23.78	22.27	22.27	20.44	23.87	22.38
Average CT	WT Polysomal	WT total	KO1 polysomal	KO total
GRB14	23.2333	21.45	23.73	23.2633
IGFBP2	21.66	20.4133	16.498	15.9667
P21	22.37	20.45	23.79	22.2667
	ΔCT WT		ΔCT KO
GRB14	-1.78333		-0.466667																						R² = 0.79076
IGFBP2	-1.24667		-0.531333
P21	-1.92		-1.52333
% mRNA in polysomal	WT		KO		P Vaule
GRB14	0.290511		0.723635			0.014
IGFBP2	0.421421		0.691915			0.037
P21	0.264255		0.347881			0.189
Fig. 3B: mRNA T1/2
GRB14
Hrs after Actinomycin	0	2	4	6	8
WT 1	20.43	20.67	21.08	21.35	22.16
KO 1	22.04	22.76	23.07	23.56	25.21
WT 2	20.58	20.89	21.28	21.72	22.28
KO 2	22.38	22.55	23.53	23.81	24.66
WT 3	20.72	21.12	21.34	21.63	22.57
KO 3	22.56	23.07	23.69	23.82	24.94
Average CT	0	2	4	6	8	Stdev	0	2	4	6	8
WT	20.5767	20.8933	21.2333	21.5667	22.3367		0.145029	0.225019	0.136137	0.192959	0.210792
KO	22.3267	22.7933	23.43	23.73	24.9367		0.264071	0.261598	0.32187	0.147309	0.275015
ΔCT
WT	0	-0.316667	-0.656667	-0.99	-1.76
KO	0	-0.466667	-1.10333	-1.40333	-2.61
2^ΔCT
WT	1	0.802923	0.634342	0.503478	0.295248
KO	1	0.723635	0.46544	0.378055	0.163799
GRB14 mRNA T1/2	Average		P value
WT	6.03		0.032
KO	3.78
IGFBP2 mRNA T1/2
Hrs after Actinomycin	0	2	4	6	8	10
WT 1	18.44	18.66	19.04	19.64	20.15	20.67
KO 1	13.96	14.03	14.25	14.48	14.87	14.96
WT 2	18.58	18.74	19.26	19.68	20.21	20.84
KO 2	14.17	14.18	14.43	14.66	15.06	14.98
WT 3	18.71	18.98	19.34	19.47	20.54	21.32
KO 3	14.21	14.36	14.68	14.85	15.12	15.42
Average	0	2	4	6	8	10	STDEV	0	2	4	6	8	10
WT	18.5767	18.7933	19.2133	19.5967	20.3	20.9433		0.135031	0.166533	0.155349	0.111505	0.21	0.337095
KO	14.1133	14.19	14.4533	14.6633	15.0167	15.12		0.134288	0.165227	0.215948	0.185023	0.130512	0.26
ΔCT
WT	0	-0.216667	-0.636667	-1.02	-1.72333	-2.15
KO	0	-0.0766667	-0.34	-0.55	-0.903333	-0.93
2^ΔCT
WT	1	0.860551	0.643197	0.493116	0.302848	0.225313
KO	1	0.948246	0.790041	0.68302	0.53465	0.524858
IGFBP2 mRNA T1/2	Average		P value
WT	5.89		0.024
KO	10.12
P21 mRNA T1/2
Hrs after Actinomycin	0	2	4
WT 1	21.56	22.56	23.65
KO 1	23.01	23.97	25.01
WT 2	21.85	23.24	24.17
KO 2	22.97	24.12	25.23
WT 3	21.97	22.73	23.67
KO 3	23.34	23.97	25.02
Average	0	2	4	STDEV	0	2	4
WT	21.7933	22.8433	23.83		0.210792	0.353883	0.294618
KO	23.1067	24.02	25.0867		0.20306	0.0866025	0.124231
ΔCT
WT	0	-1.05	-2.03667
KO	0	-0.913333	-1.98
2^ΔCT
WT	1	0.482968	0.243726
KO	1	0.530957	0.25349
P21 mRNA T1/2	Average		P value
WT	1.98		0.364
KO	2.07

## Sheet: protein
Fig. 3E: Rel. protein abundance	KO1/WT 1	KO2/WT2	KO3/WT3		Average	Stdev	P value
GRB14	10.3	9.81	10.62		10.2433	0.407962	2.52e-06
IGFBP2	43.56	35.44	31.23		36.7433	6.26747	0.000589
P21	5.46	5.17	5.24		5.29	0.151327	1.03e-06
Fig. 3D: protein T 1/2
GRB14 protein T 1/2
After Cycloheximide treatment	0h	1h	2h	3h	4h
WT	1	0.84	0.57	0.32	0.25
KO	3.83	3.31	3.06	2.76	3.85
RPL26
WT	1	1.27	1.18	1.26	1.09
KO	1.06	0.98	1.29	1.22	1.03
GRB14/RPL26	0	1	2	3	4
WT	1	0.661417	0.483051	0.253968	0.229358
KO	3.61321	3.37755	2.37209	2.2623	3.73786
T 1/2	Equation		Average		Stdev		P value
WT	y = -0.1949x + 0.9153		2.13391		0.31		0.000328
KO	y = -0.0866x + 3.2458		31.7067		0.83
IGFBP2 protein T 1/2
After Cycloheximide treatment	0h	1h	2h	3h	4h
WT	1	0.68	0.52	0.21	0.11
KO	1	0.72	0.58	0.24	0.15
RPL26
WT	1.1	1.12	1.04	1.14	1.03
KO	1	0.98	1.09	1.11	0.99
IGFBP2/RPL26	0	1	2	3	4
WT	0.909091	0.607143	0.5	0.184211	0.106796
KO	1	0.734694	0.53211	0.216216	0.151515
T 1/2	Equation		Average		Stdev		P value
WT	y = -0.2028x + 0.867		1.80966		0.21		0.2843
KO	y = -0.2215x + 0.9663		2.10519		0.19
p21 protein T 1/2
After Cycloheximide treatment	0h	1h	2h	3h	4h																	2.13	31.7
WT	1	0.52	0.37	0.19	0.11																	1.904	2.059
KO	4.01	3.53	3.06	2.24	1.85																	1.477	3.66
RPL26
WT	1.1	1.12	1.04	1.14	1.03
KO	1	0.98	1.09	1.11	0.99
p21/RPL26	0	1	2	3	4
WT	0.909091	0.464286	0.355769	0.166667	0.106796
KO	4.01	3.60204	2.80734	2.01802	1.86869
T 1/2	Equation		Average		Stdev		P value
WT	y = -0.1902x + 0.781		1.47739		0.16		0.0317
KO	y=-1.1733+4.0345		3.66364		0.19
																		0.16
																		0.19
