# Supplementary material for: IGF2 mRNA binding protein-2 is a tumor promoter that drives cancer proliferation through its client mRNAs IGF2 and HMGA1
Source: eLife journal article supplement (doi:10.7554/elife.27155), 2017-07-28
Supplement: supp [file elife_poa_e27155_Fig.4_Source_Data_File.xlsx]

## Sheet: 4D-bar graphs
Average (x104)	Day 1	Day 2	Day 3	Day 4	Day 5		Average (x104)	Day 1	Day 2	Day 3	Day 4	Day 5
RD Control	1	1.68	2.96	6.07	13.53		RD CRISPR IMP2	1	1.21	1.67	3.01	4.32
RD Control;GRB14	1	1.62	3.76	7.12	14.66		CRISPR IMP2;GRB14	1	1.41	2.08	4.21	7.32
RD Control; IGF2	1	1.81	3.87	9.01	18.32		CRISPR IMP2;IGF2	1	1.49	2.28	4.62	8.72
RD Control;GRB14; IGF2	1	1.93	4.18	9.32	20.26		CRISPR IMP2;GRB14;IGF2	1	1.54	2.26	5.14	10.93
Hela Control	1	1.84	4.02	8.89	18.74		CRISPR IMP2	1	1.43	2.18	3.67	4.89
Hela Control;GRB14	1	1.95	5.21	9.35	18.67		CRISPR IMP2;GRB14	1	1.62	3.06	5.25	9.12
Hela Control;IGF2	1	2.01	5.45	10.98	23.27		CRISPR IMP2;IGF2	1	1.72	3.93	6.87	13.12
Hela Control;GRB14;IGF2	1	2.11	6.21	12.58	25.17		CRISPR IMP2;GRB14;IGF2	1	1.79	4.12	10.06	20.12
MB-231 Control	1	1.23	2.01	3.17	4.56		CRISPR IMP2	1	1.07	1.34	1.65	2.11
MB-231 Control;GRB14	1	1.56	2.26	3.57	5.09		CRISPR IMP2;GRB14	1	1.18	1.58	2.17	3.08
MB-231 Control;IGF2	1	1.63	2.68	3.95	5.98		CRISPR IMP2;IGF2	1	1.34	1.66	2.46	3.48
MB-231 Control;GRB14;IGF2	1	1.71	2.78	4.14	6.32		CRISPR IMP2;GRB14;IGF2	1	1.34	1.96	3.12	4.81
Hep3B Control	1	1.97	5.72	12.06	25.04		CRISPR IMP2	1	1.45	2.89	4.76	7.45
Hep3B Control;GRB14	1	2.23	6.98	14.12	27.32		CRISPR IMP2;GRB14	1	1.89	3.87	6.82	13.12
Hep3B Control;IGF2	1	2.86	6.54	13.91	31.12		CRISPR IMP2;IGF2	1	2.16	5.32	11.21	25.31
Hep3B Control;GRB14;IGF2	1	3.12	7.56	15.25	32.33		CRISPR IMP2;GRB14;IGF2	1	2.68	7.32	15.03	31.16
SNU-423 Control	1	1.32	1.84	2.43	3.25		CRISPR IMP2	1	1.22	1.42	1.76	2.07
SNU-423 Control;GRB14	1	1.47	2.04	2.58	3.53		CRISPR IMP2;GRB14	1	1.23	1.61	2.01	2.61
SNU-423 Control;IGF2	1	1.48	2.44	3.99	6.48		CRISPR IMP2;IGF2	1	1.29	1.71	2.11	2.74
SNU-423 Control;GRB14 ;IGF2	1	1.48	2.54	3.99	7.28		CRISPR IMP2;GRB14 ;IGF2	1	1.29	2.03	3.01	4.44
HCC-1359 Control	1	1.67	3.02	5.98	12.04		CRISPR IMP2	1	1.24	1.98	3.08	5.11
HCC-1359 Control;GRB14	1	1.66	3.21	6.15	12.53		CRISPR IMP2;GRB14	1	1.38	2.29	4.12	7.68
HCC-1359 Control;IGF2	1	2.01	4.14	9.98	22.27		CRISPR IMP2;IGF2	1	1.52	3.14	6.47	13.85
HCC-1359 Control;GRB14;IGF2	1	2.11	6.21	12.58	22.17		CRISPR IMP2;GRB14;IGF2	1	1.89	3.77	7.21	15.02
RD	CRISPR/WT		P Vaule
Control	0.264964		0
Grb14 depl	0.462665		0.038
IGF2 added	0.445727		0.027
both	0.515576		0.042
HeLa	CRISPR/WT
Control	0.219278		0
Grb14 depl	0.419205		0.034
IGF2 added	0.54423		0.00475
both	0.791063		0.000163
MB-231	CRISPR/WT
Control	0.311798		0
Grb14 depl	0.554572		0.038
IGF2 added	0.497992		0.044
both	0.716165		0.012
Hep3B	CRISPR/WT
Control	0.268303		0
Grb14 depl	0.478673		0.026
IGF2 added	0.756849		0.00541
both	0.962656		0.000241
SNU-423	CRISPR/WT
Control	0.475556		0
Grb14 depl	0.636364		0.031
IGF2 added	0.317518		0.053
both	0.547771		0.046
HCC-1359	CRISPR/WT
Control	0.372283		0
Grb14 depl	0.579358		0.034
IGF2 added	0.604137		0.028
both	0.662258		0.012

## Sheet: 4D-Day 2-4
Experiment 1											Experiment 2												Experiment 3
Average (x104)	Day 2	Day 3	Day 4		Average (x104)	Day 2	Day 3	Day 4			Average (x104)	Day 2	Day 3	Day 4		Average (x104)	Day 2	Day 3	Day 4				Average (x104)	Day 2	Day 3	Day 4		Average (x104)	Day 2	Day 3	Day 4
RD Control	1.86	2.81	5.88		RD CRISPR IMP2	1.14	1.55	2.91			RD Control	1.57	3.06	6.11		RD CRISPR IMP2	1.15	1.59	2.95				RD Control	1.62	3.02	6.23		RD CRISPR IMP2	1.34	1.86	3.17
RD Control;GRB14	1.48	3.74	6.81		CRISPR IMP2;GRB14	1.3	1.95	4.02			RD Control;GRB14	1.59	3.71	7.22		CRISPR IMP2;GRB14	1.36	2.11	4.16				RD Control;GRB14	1.78	3.84	7.34		CRISPR IMP2;GRB14	1.58	2.17	4.45
RD Control; IGF2	1.56	3.65	8.81		CRISPR IMP2;IGF2	1.26	2.19	4.43			RD Control; IGF2	1.76	3.72	8.96		CRISPR IMP2;IGF2	1.54	2.17	4.58				RD Control; IGF2	2.12	4.23	9.26		CRISPR IMP2;IGF2	1.68	2.47	4.86
RD Control;GRB14; IGF2	1.83	4.14	9.15		CRISPR IMP2;GRB14;IGF2	1.43	1.89	4.87			RD Control;GRB14; IGF2	1.89	4.04	9.27		CRISPR IMP2;GRB14;IGF2	1.46	2.34	5.02				RD Control;GRB14; IGF2	2.04	4.36	9.55		CRISPR IMP2;GRB14;IGF2	1.72	2.54	5.52
Hela Control	2.24	4.25	9.22		CRISPR IMP2	1.68	2.39	3.85			Hela Control	1.53	3.87	8.72		CRISPR IMP2	1.25	2.01	3.43				Hela Control	1.76	3.95	8.74		CRISPR IMP2	1.36	2.13	3.74
Hela Control;GRB14	2.05	5.19	9.29		CRISPR IMP2;GRB14	1.65	3.1	5.27			Hela Control;GRB14	1.67	5.03	9.21		CRISPR IMP2;GRB14	1.46	2.95	5.04				Hela Control;GRB14	2.13	5.42	9.56		CRISPR IMP2;GRB14	1.75	3.14	5.45
Hela Control;IGF2	2.01	5.56	11.09		CRISPR IMP2;IGF2	1.96	4.11	6.98			Hela Control;IGF2	1.89	5.16	10.68		CRISPR IMP2;IGF2	1.38	3.67	6.64				Hela Control;IGF2	2.14	5.63	11.16		CRISPR IMP2;IGF2	1.82	4.02	6.99
Hela Control;GRB14;IGF2	2.09	6.12	12.57		CRISPR IMP2;GRB14;IGF2	1.95	3.99	10.08			Hela Control;GRB14;IGF2	2.01	6.04	12.32		CRISPR IMP2;GRB14;IGF2	1.49	4.03	9.85				Hela Control;GRB14;IGF2	2.23	6.47	12.84		CRISPR IMP2;GRB14;IGF2	1.93	4.34	10.26
MB-231 Control	1.28	2.06	3.26		CRISPR IMP2	1.03	1.43	1.81			MB-231 Control	1.07	1.85	2.98		CRISPR IMP2	1.05	1.14	1.36				MB-231 Control	1.35	2.13	3.26		CRISPR IMP2	1.14	1.45	1.78
MB-231 Control;GRB14	1.62	2.38	3.81		CRISPR IMP2;GRB14	1.25	1.75	2.13			MB-231 Control;GRB14	1.34	2.03	3.18		CRISPR IMP2;GRB14	1.07	1.23	2.02				MB-231 Control;GRB14	1.72	2.38	3.72		CRISPR IMP2;GRB14	1.22	1.75	2.36
MB-231 Control;IGF2	1.82	2.77	4.24		CRISPR IMP2;IGF2	1.36	1.81	2.55			MB-231 Control;IGF2	1.33	2.43	3.54		CRISPR IMP2;IGF2	1.19	1.37	2.18				MB-231 Control;IGF2	1.74	2.84	4.08		CRISPR IMP2;IGF2	1.48	1.79	2.64
MB-231 Control;GRB14;IGF2	1.75	2.85	4.02		CRISPR IMP2;GRB14;IGF2	1.44	2.05	3.03			MB-231 Control;GRB14;IGF2	1.46	2.53	4.01		CRISPR IMP2;GRB14;IGF2	1.07	1.75	3.03				MB-231 Control;GRB14;IGF2	1.91	2.96	4.38		CRISPR IMP2;GRB14;IGF2	1.52	2.08	3.31
Hep3B Control	2.03	5.78	11.98		CRISPR IMP2	1.54	2.89	4.94			Hep3B Control	1.76	5.47	11.88		CRISPR IMP2	1.19	2.67	4.44				Hep3B Control	2.13	5.91	12.32		CRISPR IMP2	1.62	3.02	4.89
Hep3B Control;GRB14	2.19	7.07	13.99		CRISPR IMP2;GRB14	2.01	3.87	6.88			Hep3B Control;GRB14	2.04	6.75	14.01		CRISPR IMP2;GRB14	1.64	3.76	6.63				Hep3B Control;GRB14	2.45	7.12	14.36		CRISPR IMP2;GRB14	2.03	3.94	6.96
Hep3B Control;IGF2	2.97	6.48	14.04		CRISPR IMP2;IGF2	2.07	5.32	11.12			Hep3B Control;IGF2	2.63	6.32	13.65		CRISPR IMP2;IGF2	2.07	5.11	11.04				Hep3B Control;IGF2	2.99	6.83	14.04		CRISPR IMP2;IGF2	2.35	5.58	11.47
Hep3B Control;GRB14;IGF2	3.05	7.61	15.18		CRISPR IMP2;GRB14;IGF2	2.65	7.32	14.91			Hep3B Control;GRB14;IGF2	2.98	7.26	15.04		CRISPR IMP2;GRB14;IGF2	2.46	7.18	14.84				Hep3B Control;GRB14;IGF2	3.33	7.81	15.52		CRISPR IMP2;GRB14;IGF2	2.92	7.54	15.33
SNU-423 Control	1.38	2.01	2.46		CRISPR IMP2	1.18	1.48	1.91			SNU-423 Control	1.14	1.53	2.26		CRISPR IMP2	1.14	1.25	1.52				SNU-423 Control	1.44	1.97	2.58		CRISPR IMP2	1.34	1.53	1.85
SNU-423 Control;GRB14	1.76	2.22	2.94		CRISPR IMP2;GRB14	1.17	1.79	2.13			SNU-423 Control;GRB14	1.08	1.76	2.14		CRISPR IMP2;GRB14	1.15	1.36	1.75				SNU-423 Control;GRB14	1.58	2.13	2.67		CRISPR IMP2;GRB14	1.38	1.67	2.14
SNU-423 Control;IGF2	1.6	2.41	4.24		CRISPR IMP2;IGF2	1.31	1.83	2.21			SNU-423 Control;IGF2	1.23	2.25	3.67		CRISPR IMP2;IGF2	1.14	1.53	1.89				SNU-423 Control;IGF2	1.62	2.66	4.06		CRISPR IMP2;IGF2	1.42	1.78	2.23
SNU-423 Control;GRB14 ;IGF2	1.59	2.54	4.19		CRISPR IMP2;GRB14 ;IGF2	1.32	2.27	3.25			SNU-423 Control;GRB14 ;IGF2	1.21	2.26	3.67		CRISPR IMP2;GRB14 ;IGF2	1.13	1.67	2.41				SNU-423 Control;GRB14 ;IGF2	1.64	2.82	4.12		CRISPR IMP2;GRB14 ;IGF2	1.43	2.14	3.36
HCC-1359 Control	1.91	3.02	6.16		CRISPR IMP2	1.27	2.11	3.32			HCC-1359 Control	1.36	2.87	5.72		CRISPR IMP2	1.14	1.78	2.67				HCC-1359 Control	1.74	3.16	6.05		CRISPR IMP2	1.32	2.05	3.24
HCC-1359 Control;GRB14	1.75	3.18	6.12		CRISPR IMP2;GRB14	1.47	2.38	4.15			HCC-1359 Control;GRB14	1.41	3.03	6.04		CRISPR IMP2;GRB14	1.21	2.03	3.85				HCC-1359 Control;GRB14	1.81	3.43	6.28		CRISPR IMP2;GRB14	1.46	2.45	4.37
HCC-1359 Control;IGF2	2.01	4.05	10.18		CRISPR IMP2;IGF2	1.61	3.02	6.62			HCC-1359 Control;IGF2	1.87	3.93	9.65		CRISPR IMP2;IGF2	1.28	2.94	6.04				HCC-1359 Control;IGF2	2.14	4.43	10.12		CRISPR IMP2;IGF2	1.67	3.46	6.74
HCC-1359 Control;GRB14;IGF2	2.08	6.21	12.76		CRISPR IMP2;GRB14;IGF2	2.12	3.98	7.18			HCC-1359 Control;GRB14;IGF2	1.98	5.89	12.14		CRISPR IMP2;GRB14;IGF2	1.57	3.32	6.87				HCC-1359 Control;GRB14;IGF2	2.27	6.54	12.83		CRISPR IMP2;GRB14;IGF2	1.97	4.01	7.58
Average											Stdev
RD Control	1.68333	2.96333	6.07333		RD CRISPR IMP2	1.21	1.66667	3.01			RD Control	0.155027	0.134288	0.177858		RD CRISPR IMP2	0.112694	0.168622	0.14
RD Control;GRB14	1.61667	3.76333	7.12333		CRISPR IMP2;GRB14	1.41333	2.07667	4.21			RD Control;GRB14	0.151767	0.0680686	0.277909		CRISPR IMP2;GRB14	0.147422	0.113725	0.219317
RD Control; IGF2	1.81333	3.86667	9.01		CRISPR IMP2;IGF2	1.49333	2.27667	4.62333			RD Control; IGF2	0.283784	0.316596	0.229129		CRISPR IMP2;IGF2	0.213854	0.16773	0.218251
RD Control;GRB14; IGF2	1.92	4.18	9.32333		CRISPR IMP2;GRB14;IGF2	1.53667	2.25667	5.13667			RD Control;GRB14; IGF2	0.108167	0.163707	0.205264		CRISPR IMP2;GRB14;IGF2	0.159478	0.332916	0.340343
Hela Control	1.84333	4.02333	8.89333		CRISPR IMP2	1.43	2.17667	3.67333			Hela Control	0.362261	0.200333	0.283078		CRISPR IMP2	0.223383	0.194251	0.217792
Hela Control;GRB14	1.95	5.21333	9.35333		CRISPR IMP2;GRB14	1.62	3.06333	5.25333			Hela Control;GRB14	0.245764	0.196044	0.183394		CRISPR IMP2;GRB14	0.147309	0.100167	0.205508
Hela Control;IGF2	2.01333	5.45	10.9767		CRISPR IMP2;IGF2	1.72	3.93333	6.87			Hela Control;IGF2	0.125033	0.253574	0.259294		CRISPR IMP2;IGF2	0.302655	0.232451	0.199249
Hela Control;GRB14;IGF2	2.11	6.21	12.5767		CRISPR IMP2;GRB14;IGF2	1.79	4.12	10.0633			Hela Control;GRB14;IGF2	0.111355	0.228692	0.260064		CRISPR IMP2;GRB14;IGF2	0.26	0.191572	0.205508
MB-231 Control	1.23333	2.01333	3.16667		CRISPR IMP2	1.07333	1.34	1.65			MB-231 Control	0.145717	0.145717	0.161658		CRISPR IMP2	0.0585947	0.173494	0.251595
MB-231 Control;GRB14	1.56	2.26333	3.57		CRISPR IMP2;GRB14	1.18	1.57667	2.17			MB-231 Control;GRB14	0.196977	0.202073	0.340735		CRISPR IMP2;GRB14	0.0964365	0.300222	0.173494
MB-231 Control;IGF2	1.63	2.68	3.95333		CRISPR IMP2;IGF2	1.34333	1.65667	2.45667			MB-231 Control;IGF2	0.262869	0.219317	0.366788		CRISPR IMP2;IGF2	0.145717	0.248462	0.24379
MB-231 Control;GRB14;IGF2	1.70667	2.78	4.13667		CRISPR IMP2;GRB14;IGF2	1.34333	1.96	3.12333			MB-231 Control;GRB14;IGF2	0.228108	0.223383	0.210792		CRISPR IMP2;GRB14;IGF2	0.240069	0.182483	0.161658
Hep3B Control	1.97333	5.72	12.06		CRISPR IMP2	1.45	2.86	4.75667			Hep3B Control	0.191398	0.226053	0.230651		CRISPR IMP2	0.228692	0.176918	0.275379
Hep3B Control;GRB14	2.22667	6.98	14.12		CRISPR IMP2;GRB14	1.89333	3.85667	6.82333			Hep3B Control;GRB14	0.207445	0.200749	0.208087		CRISPR IMP2;GRB14	0.219621	0.0907377	0.172143
Hep3B Control;IGF2	2.86333	6.54333	13.91		CRISPR IMP2;IGF2	2.16333	5.33667	11.21			Hep3B Control;IGF2	0.20232	0.260832	0.225167		CRISPR IMP2;IGF2	0.161658	0.235443	0.228692
Hep3B Control;GRB14;IGF2	3.12	7.56	15.2467		CRISPR IMP2;GRB14;IGF2	2.67667	7.34667	15.0267			Hep3B Control;GRB14;IGF2	0.185203	0.278388	0.246847		CRISPR IMP2;GRB14;IGF2	0.231157	0.181475	0.265016
SNU-423 Control	1.32	1.83667	2.43333		CRISPR IMP2	1.22	1.42	1.76			SNU-423 Control	0.158745	0.266333	0.161658		CRISPR IMP2	0.10583	0.149332	0.21
SNU-423 Control;GRB14	1.47333	2.03667	2.58333		CRISPR IMP2;GRB14	1.23333	1.60667	2.00667			SNU-423 Control;GRB14	0.352326	0.24379	0.406981		CRISPR IMP2;GRB14	0.12741	0.221886	0.222336
SNU-423 Control;IGF2	1.48333	2.44	3.99		CRISPR IMP2;IGF2	1.29	1.71333	2.11			SNU-423 Control;IGF2	0.219621	0.20664	0.291376		CRISPR IMP2;IGF2	0.141067	0.160728	0.190788
SNU-423 Control;GRB14 ;IGF2	1.48	2.54	3.99333		CRISPR IMP2;GRB14 ;IGF2	1.29333	2.02667	3.00667			SNU-423 Control;GRB14 ;IGF2	0.23516	0.28	0.282194		CRISPR IMP2;GRB14 ;IGF2	0.151767	0.315647	0.519647
HCC-1359 Control	1.67	3.01667	5.97667		CRISPR IMP2	1.24333	1.98	3.07667			HCC-1359 Control	0.281603	0.145029	0.228983		CRISPR IMP2	0.0929157	0.175784	0.354448
HCC-1359 Control;GRB14	1.65667	3.21333	6.14667		CRISPR IMP2;GRB14	1.38	2.28667	4.12333			HCC-1359 Control;GRB14	0.215716	0.202073	0.122202		CRISPR IMP2;GRB14	0.147309	0.225019	0.261024
HCC-1359 Control;IGF2	2.00667	4.13667	9.98333		CRISPR IMP2;IGF2	1.52	3.14	6.46667			HCC-1359 Control;IGF2	0.135031	0.261024	0.29023		CRISPR IMP2;IGF2	0.21	0.28	0.374344
HCC-1359 Control;GRB14;IGF2	2.11	6.21333	12.5767		CRISPR IMP2;GRB14;IGF2	1.88667	3.77	7.21			HCC-1359 Control;GRB14;IGF2	0.147309	0.325013	0.379781		CRISPR IMP2;GRB14;IGF2	0.284312	0.39	0.355949

## Sheet: 4D-DAY 5
Average (x104)	Experi. 1	Experi. 2	Experi. 3		Average	Stdev
RD Control	13.37	13.44	13.78		13.53	0.219317
CRISPR IMP2	4.2	4.32	4.44		4.32	0.12
RD Control;GRB14	14.87	14.64	14.47		14.66	0.200749
CRISPR IMP2;GRB14	7.38	7.17	7.41		7.32	0.130767
RD Control; IGF2	18.18	18.34	18.43		18.3167	0.126623
CRISPR IMP2;IGF2	8.61	8.71	8.84		8.72	0.115326
RD Control;GRB14; IGF2	20.18	20.45	20.15		20.26	0.165227
CRISPR IMP2;GRB14;IGF2	10.86	11.07	10.85		10.9267	0.124231
Hela Control	18.52	18.88	18.82		18.74	0.192873
CRISPR IMP2	4.67	5	4.99		4.88667	0.187705
Hela Control;GRB14	20.32	20.64	20.16		20.3733	0.244404
CRISPR IMP2;GRB14	8.97	9.25	9.15		9.12333	0.141892
Hela Control;IGF2	23.52	23.08	23.21		23.27	0.226053
CRISPR IMP2;IGF2	13.01	13.36	12.99		13.12	0.208087
Hela Control;GRB14;IGF2	25.35	25.14	25.02		25.17	0.167033
CRISPR IMP2;GRB14;IGF2	20.28	20.1	19.98		20.12	0.150997
MB-231 Control	4.37	4.63	4.68		4.56	0.166433
CRISPR IMP2	1.98	2.1	2.26		2.11333	0.140475
MB-231 Control;GRB14	5.02	4.73	4.92		4.89	0.147309
CRISPR IMP2;GRB14	2.74	2.96	2.95		2.88333	0.124231
MB-231 Control;IGF2	5.8	6.03	6.12		5.98333	0.165025
CRISPR IMP2;IGF2	3.32	3.51	3.6		3.47667	0.142945
MB-231 Control;GRB14;IGF2	6.19	6.38	6.4		6.32333	0.115902
CRISPR IMP2;GRB14;IGF2	4.94	4.82	4.68		4.81333	0.130128
Hep3B Control	24.88	24.96	25.27		25.0367	0.205994
CRISPR IMP2	7.41	7.58	7.37		7.45333	0.111505
Hep3Bla Control;GRB14	26.2	26.47	26.28		26.3167	0.138684
CRISPR IMP2;GRB14	13.01	13.15	13.21		13.1233	0.102632
Hep3Bla Control;IGF2	33.22	33.11	33.02		33.1167	0.100167
CRISPR IMP2;IGF2	25.48	25.16	25.29		25.31	0.160935
Hep3B Control;GRB14;IGF2	32.38	32.46	32.15		32.33	0.160935
CRISPR IMP2;GRB14;IGF2	31.31	31.15	31.03		31.1633	0.140475
SNU-423 Control	3.09	3.35	3.31		3.25	0.14
CRISPR IMP2	1.95	2.1	2.17		2.07333	0.112398
SNU-423 Control;GRB14	3.66	3.41	3.53		3.53333	0.125033
CRISPR IMP2;GRB14	2.64	2.75	2.43		2.60667	0.162583
SNU-423 Control;IGF2	6.5	6.63	6.31		6.48	0.160935
CRISPR IMP2;IGF2	2.78	2.83	2.61		2.74	0.115326
SNU-423 Control;GRB14 ;IGF2	7.31	7.42	7.12		7.28333	0.151767
CRISPR IMP2;GRB14 ;IGF2	4.6	4.29	4.43		4.44	0.155242

## Sheet: 4C-IGF2
Fig. 4C: medium IGF2 concentration
CRISPR	GFP 1	IMP2 1	GFP 2	IMP2 2	GFP 3	IMP2 3
Hep3b	77.04	43.26	72.36	34.21	83.94	41.07
Hela	85.48	30.78	71.95	39.43	78.05	34.73
RD	68.56	28.45	85.03	35.56	76.61	30.25
HCC-1359	56.65	21.65	67.42	31.43	64.18	26.24
MB-231	79.67	28.45	97.15	36.89	93.42	31.65
SNU-423	60.51	28.61	74.86	38.44	70.72	33.35
Average	GFP	IMP2	stdev	GFP	IMP2	P value
Hep3b	77.78	39.5133		5.82536	4.72155		0.000904
Hela	78.4933	34.98		6.77589	4.33042		0.000722
RD	76.7333	31.42		8.23569	3.69658		0.000964
HCC-1359	62.75	26.44		5.52557	4.89307		0.00104		z
MB-231	90.08	32.33		9.20621	4.26089		0.000593
SNU-423	68.6967	33.4667		7.38587	4.91604		0.00234
