# Supplementary material for: IGF2 mRNA binding protein-2 is a tumor promoter that drives cancer proliferation through its client mRNAs IGF2 and HMGA1
Source: eLife journal article supplement (doi:10.7554/elife.27155), 2017-07-28
Supplement: supp [file elife_poa_e27155_Fig.5_Source_Data_File.xlsx]

## Sheet: Fig 5A
Fig. 5A: HMGA1 mRNA in IMP2 IP
MEF cells				RD cells
	IMP2 +/+	IMP2 −/−		IMP2	IgG
HMGA1 mRNA CT	23.35	24.58		22.37	24.28
	23.42	24.41		22.01	24.07
	23.22	24.32		22.25	24.58
AVERAGE CT	23.33	24.4367		22.21	24.31
ΔCT	0	-1.10667		0	-2.1
2^ΔCT	1	0.464366		1	0.233258
Stdev	0.101489	0.132035		0.183303	0.25632
P value	0.000460965			0.000549989

## Sheet: Fig 5B-5F
Fig. 5B-F (data acquired as in Fig. 3):
Experiment 1	IMP2 +/+	IMP2 −/−
relative HMGA1 mRNA	1	0.059
HMGA1 mRNA t1/2	3.16	0.23
% Polysomal HMGA1 mRNA	24.1	45.6
HMGA1 protein t1/2	1.55	1.89
relative HMGA1 protein	1	0.28
Experiment 2	IMP2 +/+	IMP2 −/−
relative HMGA1 mRNA	1	0.058
HMGA1 mRNA t1/2	3.32	0.48
% Polysomal HMGA1 mRNA	26.7	50.7
HMGA1 protein t1/2	1.64	1.95
relative HMGA1 protein	1	0.31
Experiment 3	IMP2 +/+	IMP2 −/−
relative HMGA1 mRNA	1	0.11
HMGA1 mRNA t1/2	3.96	0.56
% Polysomal HMGA1 mRNA	35.6	60.1
HMGA1 protein t1/2	1.97	2.34
relative HMGA1 protein	1	0.43
Average
relative HMGA1 mRNA	1	0.0756667
HMGA1 mRNA t1/2	3.48	0.423333
% Polysomal HMGA1 mRNA	28.8	52.1333
HMGA1 protein t1/2	1.72	2.06
relative HMGA1 protein	1	0.34
Stdev
relative HMGA1 mRNA	0	0.0297377
HMGA1 mRNA t1/2	0.42332	0.172143
% Polysomal HMGA1 mRNA	6.03075	7.3555
HMGA1 protein t1/2	0.221133	0.244336
relative HMGA1 protein	0	0.0793725
P value
relative HMGA1 mRNA	6.88e-07
HMGA1 mRNA t1/2	3.17e-07
% Polysomal HMGA1 mRNA	0.0132
HMGA1 protein t1/2	0.148
relative HMGA1 protein	0.000135

## Sheet: Fig 5G
Fig. 5G, left					Fig. 5G, right
igfbp2 mRNA					igfbp2 mRNA
Experiment 1	MEF cells	RD cells			Experiment 1	MEF cells	RD cells
sh GFP	22.76	21.48			CONTROL	22.34	21.34
sh HMGA1	19.08	17.59			HMGA1 OE	23.77	23.59
Experiment 2					Experiment 2
sh GFP	22.41	21.96			CONTROL	22.18	21.23
sh HMGA1	18.65	17.34			HMGA1 OE	23.71	23.43
Experiment 3					Experiment 3
sh GFP	22.82	21.69			CONTROL	22.56	21.19
sh HMGA1	19.47	17.07			HMGA1 OE	23.86	23.45
average					average
sh GFP	22.66	21.71			sh GFP	22.36	21.25
sh HMGA1	19.07	17.33			sh HMGA1	23.78	23.49
STDEV					STDEV
sh GFP	0.22	0.24				0.19	0.08
sh HMGA1	0.41	0.26				0.08	0.09
ΔCT					ΔCT
sh GFP	0	0			CONTROL	0	0
sh HMGA1	3.6	4.38			HMGA1 OE	-1.42	-2.24
2^ΔCT					2^ΔCT
sh GFP	1	1			CONTROL	1	1
sh HMGA1	12.1	20.77			HMGA1 OE	0.37	0.21
P vaule	0.000182	2.82e-05				0.000278	4.92e-06

## Sheet: Fig 5H
Fig. 5H: HMGA1 CHIP (% of chromatin input)
Experiment 1	HMGA1 IP	IgG control
IGF1R	3.02	0.16
IGFBP1	3.67	0.36
IGFBP2	3.34	0.31
IGFBP3	1.96	0.11
Grb14	0.09	0.09
Experiment 2
IGF1R	3.36	0.21
IGFBP1	4.02	0.51
IGFBP2	3.58	0.42
IGFBP3	2.18	0.08
Grb14	0.18	0.42
Experiment 3
IGF1R	3.85	0.38
IGFBP1	4.69	0.82
IGFBP2	4.25	0.62
IGFBP3	2.48	0.38
Grb14	0.57	0.51
Average
IGF1R	3.41	0.25
IGFBP1	4.12667	0.563333
IGFBP2	3.72333	0.45
IGFBP3	2.20667	0.19
Grb14	0.28	0.34
Stdev
IGF1R	0.417253	0.115326
IGFBP1	0.518298	0.234592
IGFBP2	0.471628	0.157162
IGFBP3	0.261024	0.165227
Grb14	0.255147	0.221133
p Vaule
IGF1R	0.000225
IGFBP1	0.00041
IGFBP2	0.000337
IGFBP3	0.000349
Grb14	0.774

## Sheet: Fig 5J-K
Fig. 5J:								Fig. 5K:
MEF cells								RD cells
Experiment 1	Day 1	Day 2	Day 3	Day 4	Day 5			Experiment 1	Day 1	Day 2	Day 3	Day 4	Day 5
IMP2 +/+	1	1.45	2.33	3.65	5.77			RD Control	1	1.49	2.74	5.56	11.02
IMP2 +/+;HMGA1 OE	1	1.46	2.65	4.64	7.21			RD Control;HMGA1 OE	1	1.74	3.82	7.66	15.04
IMP2 −/−	1	1.11	1.34	1.72	2.35			RD CRISPRIMP2	1	1.13	1.78	3.04	5.25
IMP2 −/−;HMGA1OE	1	1.34	2.02	3.34	5.43			RD CRISPRIMP2;HMGA1OE	1	1.28	3.06	6.03	12.41
Experiment 2	Day 1	Day 2	Day 3	Day 4	Day 5			Experiment 2	Day 1	Day 2	Day 3	Day 4	Day 5
IMP2 +/+	1	1.64	2.44	3.84	5.87			RD Control	1	1.53	2.65	5.51	11.05
IMP2 +/+;HMGA1 OE	1	1.68	2.87	4.76	7.32			RD Control;HMGA1 OE	1	1.89	3.93	7.88	15.18
IMP2 −/−	1	1.26	1.56	1.94	2.48			RD CRISPRIMP2	1	1.24	1.98	3.12	5.47
IMP2 −/−;HMGA1OE	1	1.46	2.11	3.52	5.58			RD CRISPRIMP2;HMGA1OE	1	1.44	3.27	6.24	12.88
Experiment 3	Day 1	Day 2	Day 3	Day 4	Day 5			Experiment 3	Day 1	Day 2	Day 3	Day 4	Day 5
IMP2 +/+	1	1.41	2.45	3.93	6.09			RD Control	1	1.72	2.93	5.85	11.28
IMP2 +/+;HMGA1 OE	1	1.66	2.96	5.03	7.43			RD Control;HMGA1 OE	1	1.96	4.18	8.02	15.26
IMP2 −/−	1	1.24	1.64	2.05	2.68			RD CRISPRIMP2	1	1.34	2.19	3.09	5.66
IMP2 −/−;HMGA1OE	1	1.45	2.23	3.64	5.85			RD CRISPRIMP2;HMGA1OE	1	1.52	3.42	6.24	12.91
Average (x104)								Average(x104)
IMP2 +/+	1	1.5	2.40667	3.80667	5.91			RD Control	1	1.58	2.77333	5.64	11.1167
IMP2 +/+;HMGA1 OE	1	1.6	2.82667	4.81	7.32			RD Control;HMGA1 OE	1	1.86333	3.97667	7.85333	15.16
IMP2 −/−	1	1.20333	1.51333	1.90333	2.50333			RD CRISPRIMP2	1	1.23667	1.98333	3.08333	5.46
IMP2 −/−;HMGA1OE	1	1.41667	2.12	3.5	5.62			RD CRISPRIMP2;HMGA1OE	1	1.41333	3.25	6.17	12.7333
Stdev								Stdev
IMP2 +/+	0	0.122882	0.0665833	0.142945	0.163707			RD Control	0	0.122882	0.142945	0.183576	0.142244
IMP2 +/+;HMGA1 OE	0	0.121655	0.159478	0.19975	0.11			RD Control;HMGA1 OE	0	0.112398	0.184481	0.181475	0.111355
IMP2 −/−	0	0.0814453	0.155349	0.168028	0.166233			RD CRISPRIMP2	0	0.10504	0.20502	0.0404145	0.205183
IMP2 −/−;HMGA1OE	0	0.0665833	0.105357	0.150997	0.212838			RD CRISPRIMP2;HMGA1OE	0	0.122202	0.180831	0.121244	0.280416
P value								P value
IMP2 +/+;HMGA1 OE and IMP2 +/+	0.000245							RD Control;HMGA1 OE and RD Control			5.86e-05
IMP2 −/−;HMGA1OE and IMP2 −/−	3.69e-05							RD CRISPRIMP2;HMGA1OE and RD CRISPRIMP2			3.45e-06
