# Supplementary material for: IGF2 mRNA binding protein-2 is a tumor promoter that drives cancer proliferation through its client mRNAs IGF2 and HMGA1
Source: eLife journal article supplement (doi:10.7554/elife.27155), 2017-07-28
Supplement: supp [file elife_poa_e27155_Fig.6_Source_Data_File.xlsx]

## Sheet: Body temperature
		wt	ko
	0	37.7	37.8		0.26	0.26
	30	36.6	37.2		0.25	0.27
	60	36.3	37.1		0.26	0.27
	90	36.2	37		0.22	0.24
	120	36.1	36.9		0.24	0.23
	150	35.9	36.85		0.23	0.21
	180	35.8	36.8		0.24	0.26
	300	33.3	36.2		0.25	0.26

## Sheet: Fig. 6A
Fig. 6A:
Experiment 1	Day 1	Day 2	Day 3	Day 4	Day 5	Day 6	Day 7
SS	1.01	1.48	2.01	2.38	2.75	2.97	3.08
Flag	0.98	1.13	1.31	1.52	1.73	1.88	2.04
AA	1.02	1.24	1.35	1.48	1.65	1.87	2.01
DD	0.97	1.36	1.88	2.25	2.53	2.78	3.04
AD	1.02	1.52	2.04	2.26	2.67	2.86	2.97
DA	0.96	1.21	1.45	1.65	1.74	1.98	2.15
Experiment 2
SS	0.98	1.38	1.88	2.22	2.61	2.78	2.89
Flag	1.01	1.23	1.42	1.61	1.85	2.07	2.16
AA	1.03	1.32	1.56	1.69	1.87	2.08	2.23
DD	0.98	1.53	2.23	2.57	2.81	3.01	3.25
AD	0.97	1.48	1.96	2.16	2.52	2.68	2.78
DA	1.01	1.34	1.54	1.78	1.86	2.13	2.28
Experiment 3
SS	1.02	1.65	2.12	2.31	2.76	3.02	3.06
Flag	1.01	1.26	1.48	1.68	1.89	2.06	2.15
AA	1.03	1.38	1.64	1.72	1.93	2.16	2.32
DD	0.98	1.47	2.16	2.48	2.79	2.93	3.13
AD	1.03	1.56	2.08	2.28	2.68	2.91	3.06
DA	1.01	1.38	1.58	1.76	1.89	2.12	2.31
Average	Day 1	Day 2	Day 3	Day 4	Day 5	Day 6	Day 7
SS	1.00333	1.50333	2.00333	2.30333	2.70667	2.92333	3.01
Flag	1	1.20667	1.40333	1.60333	1.82333	2.00333	2.11667
AA	1.02667	1.31333	1.51667	1.63	1.81667	2.03667	2.18667
DD	0.976667	1.45333	2.09	2.43333	2.71	2.90667	3.14
AD	1.00667	1.52	2.02667	2.23333	2.62333	2.81667	2.93667
DA	0.993333	1.31	1.52333	1.73	1.83	2.07667	2.24667
Stdev	Day 1	Day 2	Day 3	Day 4	Day 5	Day 6	Day 7
SS	0.0208167	0.136504	0.120139	0.0802081	0.083865	0.126623	0.104403
Flag	0.0173205	0.0680686	0.0862168	0.0802081	0.0832666	0.106927	0.0665833
AA	0.0057735	0.0702377	0.149778	0.130767	0.147422	0.149778	0.159478
DD	0.0057735	0.0862168	0.185203	0.165025	0.156205	0.116762	0.105357
AD	0.0321455	0.04	0.061101	0.064291	0.0896289	0.120968	0.142945
DA	0.0288675	0.0888819	0.0665833	0.07	0.0793725	0.083865	0.085049
