# Supplementary material for: IGF2 mRNA binding protein-2 is a tumor promoter that drives cancer proliferation through its client mRNAs IGF2 and HMGA1
Source: eLife. 2017 Jul 28;6:e27155. doi: 10.7554/eLife.27155 (PMC5576481; doi:10.7554/eLife.27155)
Supplement: Supplementary file 1. [file elife-27155-supp1.xlsx]

## Sheet: Sheet1
NAME	Description	IMP2_KO_total	IMP2_KO_IP	IMP2_WT_total	IMP2_WT_IP	IMP2_KO_norm	IMP2_WT_norm	IMP2wt2ko
GM9938	na	1.4525	0	1.42677	0.511746	0.00573794	0.362422	63.1624
EIF2S3Y	na	0.0691668	0	28.1703	33.4341	0.108092	1.1868	10.9795
TAC1	na	0.0345834	0	1.09496	1.97875	0.195096	1.80101	9.23143
IFI27L2B	na	0.0691668	0	1.79175	1.36466	0.108092	0.762743	7.05641
GM28438	na	1.52167	0	1.09496	0.0341164	0.00547855	0.0385183	7.03075
LRRTM2	na	0.587918	0.0513145	1.85811	1.26231	0.100112	0.680789	6.80026
NOVA2	na	0.518751	0.0769717	1.22768	1.22819	0.161921	1.00041	6.17838
HOXD12	na	0.0345834	0	2.62127	3.00225	0.195096	1.14488	5.86828
GM6645	na	0.449584	0	1.09496	0.102349	0.0183037	0.10036	5.48307
PCDHGB6	na	1.17584	0.205258	1.45995	1.36466	0.180406	0.935104	5.18332
GM13502	na	0.933752	0.230915	1.52631	1.80817	0.253995	1.18366	4.66017
RPPH1	na	1.245	0.410516	1.62585	2.4905	0.334214	1.52909	4.57517
RBFOX1	na	0.276667	0.0513145	1.99084	1.8764	0.209427	0.942761	4.50163
LINGO2	na	0.2075	0.0513145	3.0858	3.75281	0.276525	1.21557	4.39588
VIP	na	0.380417	0.128286	11.6796	17.7405	0.351514	1.51857	4.32007
SHANK2	na	0.2075	0.0513145	1.22768	1.46701	0.276525	1.19362	4.31649
SERAC1	na	0.899168	0.179601	1.29404	1.12584	0.207132	0.870855	4.20434
TPD52-PS	na	0.449584	0.102629	2.78717	2.76343	0.242401	0.991508	4.09037
ZFP612	na	1.4525	0.256572	1.89129	1.39877	0.181366	0.740734	4.0842
3300005D01RIK	na	0.138334	0.0513145	4.97709	8.05148	0.406888	1.61667	3.97326
HECTD2	na	2.2825	0.307887	1.82493	0.989376	0.138055	0.544237	3.94216
ZBED6	na	1.17584	0.0256572	1.32722	0.136466	0.0287445	0.108451	3.77294
TUBB4A	na	0.449584	0.128286	6.5034	7.30092	0.298425	1.12247	3.76132
ACTG1	na	0.864585	0.0769717	1.32722	0.47763	0.0977748	0.363889	3.7217
PTPRB	na	0.0345834	0	2.02402	1.46701	0.195096	0.725935	3.72091
HOXA13	na	0.172917	0.0513145	2.15674	2.62696	0.329273	1.21718	3.69658
PRSS46	na	0.10375	0.0256572	1.99084	2.21757	0.303567	1.11341	3.66776
GM18048	na	0.968335	0.179601	1.26086	0.887027	0.192464	0.705466	3.66544
PCDHGA12	na	2.17875	0.615774	1.39359	1.36466	0.285376	0.979366	3.43184
RNF165	na	0.449584	0.128286	1.0286	1.02349	0.298425	0.995076	3.33443
KLK8	na	0.518751	0.436173	1.16132	3.20694	0.843346	2.74884	3.25944
CCL20	na	0.10375	0.0256572	1.59267	1.56936	0.303567	0.985439	3.2462
NR2C2	na	11.5163	1.20589	9.921	3.37753	0.105363	0.340999	3.23642
PSTPIP2	na	0.276667	0.0769717	1.59267	1.53524	0.299436	0.96413	3.21982
SORBS1	na	12.1042	2.38612	16.9885	10.542	0.197688	0.620724	3.13992
RP23-169H13.6	na	0.760835	0.0256572	2.02402	0.272931	0.0442524	0.138415	3.12784
ILK	na	0.518751	0.256572	1.45995	2.2858	0.502634	1.56244	3.10852
ZFP445	na	10.9629	1.79601	8.09607	4.09397	0.164464	0.506185	3.07778
PRRG4	na	0.553334	0.0513145	4.6121	1.50112	0.106276	0.326698	3.07406
LRRC4C	na	1.27959	0.410516	3.98167	3.95751	0.32524	0.993943	3.05603
GM16459	na	0.933752	0.538802	2.68763	4.7763	0.580793	1.77473	3.0557
WDFY2	na	3.49292	0.538802	2.02402	0.95526	0.15628	0.47414	3.03391
ANGPTL7	na	0.484167	0.179601	9.88782	11.3949	0.381653	1.15229	3.0192
SMARCA5-PS	na	1.76375	0.872346	1.39359	2.0811	0.496987	1.49039	2.99886
CRMP1	na	0.345834	0.102629	4.21394	3.95751	0.3134	0.939268	2.99702
CCDC3	na	0.449584	0.128286	1.49313	1.33054	0.298425	0.891718	2.98808
ZC3H11A	na	5.56793	0.667088	4.18076	1.50112	0.121132	0.360338	2.97475
HOXB3	na	3.25084	1.25721	3.01943	3.47988	0.38831	1.15207	2.96688
HAPLN4	na	1.76375	0.590117	3.81577	3.82104	0.337728	1.00138	2.96505
CMYA5	na	3.32001	0.795375	2.0572	1.46701	0.241485	0.714273	2.95783
NTRK3	na	9.09543	3.82293	1.09496	1.36466	0.420847	1.24444	2.95698
GM3470	na	0.622501	0.307887	2.389	3.51399	0.501312	1.46926	2.93082
AFF2	na	3.45834	0.513145	2.91989	1.26231	0.150438	0.433938	2.88449
RHOF	na	1.34875	0.923661	1.89129	3.71869	0.686773	1.96195	2.85677
2016-09-03	na	0.933752	0.333544	1.3604	1.39877	0.362928	1.02803	2.83261
GM13410	na	1.48709	0.128286	1.92447	0.47763	0.0913886	0.251448	2.75141
MFSD4	na	3.87334	0.487488	4.67846	1.63759	0.127745	0.351189	2.74915
PCDHGC5	na	3.90792	0.898004	10.3192	6.41389	0.231439	0.621858	2.68692
RP23-76C20.4	na	0.726251	0.230915	1.0286	0.887027	0.325737	0.863477	2.65084
PCDH20	na	0.0345834	0	1.39359	0.716445	0.195096	0.517007	2.65001
KIF21B	na	5.49876	2.00127	5.17617	4.981	0.364917	0.962354	2.63719
GM19028	na	3.07792	0.769717	1.85811	1.22819	0.252114	0.662511	2.62782
PTGS2OS	na	0.380417	0.102629	1.89129	1.39877	0.285523	0.740734	2.5943
PCDHGA1	na	3.35459	1.33418	1.1945	1.22819	0.399218	1.02801	2.57505
FAM49A	na	1.41792	0.538802	4.97709	4.91277	0.383639	0.987098	2.57299
NIPAL4	na	0.2075	0.102629	2.85353	3.71869	0.514221	1.3023	2.53257
ADCYAP1R1	na	0.172917	0.0513145	4.18076	3.47988	0.329273	0.832691	2.52888
SCN2A1	na	7.60835	3.05321	2.75399	2.79755	0.401957	1.01577	2.52706
TES3-PS	na	3.76959	1.66772	3.35124	3.75281	0.443652	1.11953	2.52344
5830417I10RIK	na	1.69459	0.307887	1.39359	0.648212	0.185717	0.468338	2.52179
PRKG1	na	13.6259	2.56572	14.4004	6.75505	0.188797	0.469397	2.48625
HCN1	na	0.795418	0.333544	1.59267	1.6717	0.425388	1.04937	2.46685
SLC8A1	na	0.691668	0.102629	5.27572	2.04699	0.158576	0.388972	2.4529
FILIP1L	na	6.15584	2.61704	171.676	177.337	0.425913	1.03297	2.42531
ZFP141	na	6.46709	3.43807	2.88671	3.71869	0.532232	1.28738	2.41882
GM11405	na	1.4525	0.718403	1.16132	1.39877	0.497497	1.203	2.41811
IL15	na	1.0375	0.564459	1.26086	1.6717	0.547711	1.32369	2.41677
RPS25	na	2.73209	1.10326	2.62127	2.55873	0.40564	0.976219	2.40662
SLC16A13	na	0.242084	0.153943	2.95307	4.60572	0.648095	1.55805	2.40405
EGR3	na	1.72917	0.667088	2.12356	1.97875	0.388749	0.932078	2.39764
ADAMTS12	na	9.44127	1.71904	25.8145	11.2584	0.182802	0.436311	2.38679
GUCY1B3	na	0.138334	0.0513145	2.85353	2.76343	0.406888	0.968517	2.38031
IL6RA	na	1.07209	0.230915	1.75857	0.921144	0.221476	0.526061	2.37525
GM13712	na	1.62542	0.974975	1.12814	1.60347	0.601883	1.41823	2.35633
PCDHGA9	na	1.17584	0.307887	1.09496	0.682329	0.26707	0.626017	2.34402
GM14230	na	3.87334	1.51378	2.48855	2.2858	0.392135	0.918802	2.34308
DIRAS2	na	1.21042	0.641431	1.39359	1.73994	0.533158	1.24705	2.33898
NYNRIN	na	13.3492	1.74469	7.03429	2.14933	0.131242	0.306378	2.33445
GATAD2B	na	6.50168	1.56509	7.46564	4.19632	0.241699	0.562576	2.32759
GM26917	na	2.14417	0.307887	6.80202	2.31992	0.146928	0.341874	2.32682
PDGFB	na	0.726251	0.46183	1.32722	1.97875	0.640064	1.48781	2.32448
GM8307	na	0.345834	0.102629	2.72081	1.97875	0.3134	0.728104	2.32324
FBXL7	na	5.84459	1.30852	3.01943	1.56936	0.224997	0.521081	2.31595
ZIM1	na	44.6126	8.82609	2.42218	1.09173	0.197989	0.452614	2.28605
MCTP1	na	0.795418	0.230915	1.75857	1.19407	0.297708	0.680525	2.28588
GM10269	na	1.79834	1.00063	1.09496	1.39877	0.558479	1.27536	2.28363
GM12473	na	4.42667	1.33418	2.88671	1.97875	0.302715	0.68638	2.26741
PAX8	na	1.93667	1.25721	8.66014	12.7254	0.65067	1.46897	2.25763
RFX3	na	1.97125	0.333544	2.12356	0.818794	0.172722	0.387992	2.24634
MYCL	na	0.138334	0.0513145	3.81577	3.47988	0.406888	0.912165	2.24181
HECW2	na	6.22501	3.23281	1.49313	1.73994	0.519973	1.16438	2.2393
GM16464	na	2.45542	0.846689	6.8352	5.28805	0.347054	0.773926	2.22999
UPRT	na	2.38625	0.692746	2.62127	1.70582	0.292791	0.651875	2.22642
AAK1	na	4.25376	0.769717	6.27113	2.52462	0.182561	0.403375	2.20954
GM6634	na	1.00292	0.436173	2.35582	2.2858	0.439588	0.970382	2.20748
GM14584	na	3.04334	2.02692	2.72081	3.99162	0.666937	1.46564	2.19756
GSE1	na	5.25668	1.12892	6.00569	2.83166	0.216009	0.472233	2.18617
KLF7	na	5.91376	1.94995	8.69332	6.27742	0.33068	0.722365	2.18448
IL11	na	0.899168	0.487488	2.68763	3.20694	0.546383	1.19262	2.18276
MYO1H	na	1.79834	2.2835	1.09496	3.03636	1.26853	2.75956	2.1754
ATM	na	5.25668	1.10326	5.90615	2.6952	0.211136	0.457108	2.16499
SLURP1	na	0.242084	0.179601	1.1945	1.94464	0.750533	1.62361	2.16328
PRICKLE3	na	3.25084	2.95058	2.55491	5.01511	0.907875	1.95979	2.15865
GPAM	na	9.33752	2.69401	4.4462	2.76343	0.289153	0.622239	2.15194
ALX4	na	0.795418	0.436173	3.45078	4.09397	0.553067	1.18594	2.14429
GM10138	na	1.69459	1.79601	1.22768	2.79755	1.05956	2.27005	2.14246
LYSMD3	na	7.78126	2.15521	13.8363	8.22206	0.277752	0.594483	2.14034
STON1	na	33.0617	9.5445	43.0684	26.6108	0.288868	0.617947	2.13921
GM1826	na	3.14709	1.71904	2.91989	3.41164	0.547436	1.16793	2.13346
VGF	na	0.449584	0.333544	1.26086	2.01287	0.746619	1.59248	2.13293
PCDHGA7	na	8.47293	3.1815	8.12925	6.51624	0.376107	0.801784	2.1318
2610507I01RIK	na	2.76667	1.28286	1.75857	1.73994	0.465304	0.989454	2.12647
MICAL3	na	1.83292	0.46183	2.02402	1.09173	0.25537	0.541285	2.11961
PHF11D	na	3.25084	3.28413	1.12814	2.42227	1.01021	2.13867	2.11705
SPINK5	na	0.380417	0.128286	1.42677	1.05761	0.351514	0.742775	2.11307
GM12444	na	1.10667	0.590117	1.0286	1.15996	0.536746	1.12668	2.09908
E2F7	na	2.00584	0.74406	3.05262	2.38815	0.373565	0.782925	2.09582
ZFP955A	na	1.93667	0.513145	1.52631	0.852911	0.26813	0.561216	2.09307
1810011O10RIK	na	0.691668	0.333544	5.01027	5.11746	0.488432	1.02136	2.0911
CDKL1	na	0.726251	0.46183	1.09496	1.46701	0.640064	1.3372	2.08916
KMT2E	na	52.0826	15.7536	43.8979	27.7367	0.302585	0.631914	2.08839
9930111J21RIK2	na	0.172917	0.0513145	1.59267	1.09173	0.329273	0.687116	2.08677
KIF9	na	3.14709	2.2835	1.39359	2.11522	0.726319	1.51473	2.08549
CTNNA2	na	0.795418	0.359201	2.25628	2.14933	0.457307	0.952776	2.08345
GM13961	na	2.24792	0.795375	3.78259	2.79755	0.356228	0.740161	2.07778
DYNLT1B	na	1.31417	1.00063	1.09496	1.73994	0.762931	1.58457	2.07695
SNTB1	na	1.66	0.590117	1.1945	0.887027	0.35873	0.744386	2.07506
VIPR2	na	0.172917	0.153943	1.0286	1.91052	0.895347	1.85047	2.06676
ATP8B4	na	0.415001	0.179601	3.01943	2.76343	0.444003	0.915449	2.06181
GM5830	na	2.17875	1.74469	2.18992	3.61634	0.801539	1.64887	2.05713
GM17538	na	2.73209	1.46246	1.79175	1.97875	0.536713	1.10388	2.05674
P2RX6	na	6.60543	6.67088	1.3604	2.83166	1.0099	2.07486	2.05453
RNF207	na	1.0375	0.615774	1.0286	1.26231	0.596774	1.22537	2.05333
SYN1	na	0.587918	0.487488	3.4176	5.83391	0.831578	1.70529	2.05067
GM3555	na	0.864585	0.436173	2.32264	2.42227	0.509247	1.04274	2.04761
CCDC92	na	2.35167	1.79601	3.68305	5.76568	0.764555	1.56418	2.04587
PGM5	na	1.69459	0.898004	2.389	2.59285	0.532239	1.08503	2.03861
KRT80	na	0.484167	0.179601	2.82035	2.18345	0.381653	0.774846	2.03024
ANKRD26	na	5.11834	1.35983	4.47938	2.42227	0.266879	0.541617	2.02945
GM4784	na	5.01459	2.23218	5.24253	4.74218	0.446063	0.904712	2.02821
LRRC56	na	4.46126	4.46436	1.3604	2.76343	1.00069	2.02501	2.02361
VCL	na	184.952	39.4608	248.556	107.16	0.213393	0.431148	2.02044
ARHGAP5	na	72.1064	14.599	35.6691	14.5677	0.202557	0.408551	2.01697
ANKRD6	na	1.52167	0.872346	2.35582	2.72931	0.57562	1.15798	2.0117
CCDC82	na	3.00876	1.05195	4.31348	3.03636	0.351436	0.704499	2.00463
GM2223	na	9.85627	3.74596	10.2196	7.74443	0.380585	0.757998	1.99166
GM7236	na	2.04042	0.821032	1.82493	1.46701	0.404829	0.804765	1.98792
PTPRQ	na	3.87334	1.30852	3.05262	2.04699	0.339257	0.67147	1.97924
ADAM22	na	1.48709	0.718403	2.55491	2.45638	0.485992	0.961564	1.97856
SLC25A23	na	5.74084	4.18213	14.9976	21.6298	0.728883	1.44197	1.97833
GM14292	na	5.04918	3.59201	4.04803	5.69744	0.711885	1.40662	1.97591
ZFP14	na	2.73209	1.20589	1.09496	0.95526	0.443089	0.873385	1.97113
KIF13B	na	6.29418	1.23155	3.18534	1.22819	0.196734	0.387189	1.96808
GAS2L3	na	2.04042	0.74406	2.65445	1.91052	0.36726	0.720625	1.96217
GM27219	na	1.4525	1.12892	1.3604	2.0811	0.778502	1.52652	1.96085
IIGP1	na	3.07792	2.84795	1.29404	2.35403	0.925488	1.81386	1.95989
B3GNT5	na	0.380417	0.153943	5.44162	4.43514	0.417505	0.815324	1.95285
KAT6B	na	20.4042	6.79917	18.0834	11.7702	0.333498	0.651043	1.95217
TSGA10	na	5.01459	2.69401	2.12356	2.21757	0.538007	1.0441	1.94067
IRS2	na	3.49292	0.821032	2.09038	0.95526	0.236887	0.459148	1.93826
SH2D3C	na	2.49	2.8223	1.22768	2.6952	1.133	2.18725	1.93049
EFCAB2	na	2.97417	1.69338	2.35582	2.59285	0.570572	1.10026	1.92834
GPR162	na	2.21334	0.898004	1.26086	0.989376	0.407966	0.786104	1.92689
MMU-MIR-5103	na	0.691668	0.28223	2.2231	1.77405	0.41513	0.798768	1.92414
NPY1R	na	1.34875	0.590117	5.3089	4.50337	0.441002	0.848508	1.92404
GM17149	na	5.94834	5.92682	4.41302	8.46087	0.996387	1.91551	1.92246
PIF1	na	1.21042	0.923661	1.45995	2.14933	0.764721	1.46951	1.92162
DVL3	na	22.168	7.9794	26.7436	18.4911	0.360194	0.691519	1.91985
NEU3	na	2.76667	1.74469	2.58809	3.13871	0.631727	1.21207	1.91866
HTR2A	na	0.311251	0.0513145	13.6372	4.87865	0.186767	0.358139	1.91757
USP53	na	5.94834	1.94995	3.5835	2.25168	0.32876	0.629214	1.9139
WNT2B	na	0.276667	0.0769717	1.26086	0.716445	0.299436	0.57107	1.90715
TCEA1-PS1	na	13.8334	6.26037	12.6086	10.8831	0.452888	0.863241	1.90608
CAGE1	na	3.38917	2.02692	1.1945	1.36466	0.59905	1.14146	1.90544
DMTN	na	1.0375	1.10326	1.3604	2.76343	1.06287	2.02501	1.90522
ZFP11	na	4.53042	2.02692	2.72081	2.31992	0.448423	0.85311	1.90247
LECT1	na	2301.73	2741.22	1.09496	2.4905	1.19094	2.26483	1.90172
LMBRD2	na	4.04626	0.641431	6.30431	1.91052	0.160264	0.303975	1.89671
MEG3	na	102.056	11.8536	50.7995	11.1902	0.116222	0.22041	1.89647
NNAT	na	0.380417	0.153943	2.15674	1.70582	0.417505	0.791736	1.89635
4931406P16RIK	na	13.8679	3.05321	12.4095	5.1857	0.220634	0.418273	1.89577
SLC16A7	na	2.31709	1.38549	1.62585	1.84229	0.599395	1.13244	1.88931
ECHDC1	na	5.15293	1.82166	4.84437	3.24106	0.35457	0.669609	1.88851
D030028A08RIK	na	3.80417	1.79601	2.25628	2.01287	0.473276	0.892518	1.88583
RAB38	na	2.55917	3.20716	1.65903	3.92339	1.25237	2.35801	1.88283
UNKL	na	3.90792	1.25721	2.02402	1.22819	0.323159	0.608431	1.88276
ARID5B	na	11.4125	2.59138	29.763	12.7254	0.227632	0.42772	1.879
MASP1	na	9.7871	3.8999	39.5513	29.6472	0.398988	0.749641	1.87885
SPRTN	na	6.22501	1.94995	5.74024	3.37753	0.314168	0.588994	1.87477
AA415398	na	4.11542	3.77162	1.72539	2.96813	0.916628	1.71678	1.87293
BMP5	na	3.38917	1.20589	1.22768	0.818794	0.357396	0.669202	1.87244
TRAF3IP1	na	7.36626	5.13145	5.83979	7.60796	0.69696	1.30235	1.86861
STIL	na	2.905	0.795375	3.84895	1.97875	0.275884	0.515158	1.8673
DNAJA4	na	3.38917	1.77035	6.00569	5.86803	0.523533	0.97711	1.86638
HMGA1	na	3.25084	4.31042	33.6783	83.1076	1.3251	2.46732	1.86199
CARD6	na	4.25376	2.23218	2.0572	2.01287	0.52569	0.97854	1.86144
GM5903	na	1.245	0.359201	1.1945	0.648212	0.293273	0.54585	1.86124
POU2F1	na	4.01167	1.41115	3.48396	2.2858	0.353112	0.656918	1.86036
UBTD2	na	19.505	8.54386	8.79286	7.16445	0.438275	0.81498	1.85952
SENP5	na	12.7613	4.2591	28.1371	17.4676	0.33419	0.620915	1.85797
TNRC18	na	62.3539	14.445	39.7172	17.0923	0.231765	0.430471	1.85736
PREX1	na	1.76375	1.18023	1.55949	1.94464	0.670725	1.24565	1.85717
FAM120C	na	5.67168	1.10326	3.11898	1.12584	0.19571	0.362678	1.85314
USP9X	na	57.5813	13.8806	52.7903	23.5745	0.241171	0.446655	1.85203
ZFP317	na	8.19626	3.30979	6.43704	4.81042	0.404425	0.747632	1.84863
MED12	na	25.6609	8.00506	17.2871	9.962	0.312181	0.576473	1.8466
GM13082	na	2.04042	0.795375	2.68763	1.94464	0.392306	0.724411	1.84655
HOXB8	na	1.48709	1.05195	14.9645	19.5828	0.709028	1.30845	1.84541
RALGAPA2	na	6.74376	3.64333	3.31806	3.30929	0.540823	0.997365	1.84416
GM7327	na	5.91376	3.95122	5.80661	7.13033	0.668609	1.22764	1.83611
PCDHGB6	na	5.39501	1.66772	4.37984	2.4905	0.310195	0.569452	1.83579
GM27000	na	2.24792	0.359201	1.16132	0.341164	0.162914	0.298834	1.8343
EXOC6	na	0.622501	0.205258	2.42218	1.50112	0.338637	0.621051	1.83397
SETD1B	na	15.6317	4.56699	16.4244	8.80204	0.292542	0.536149	1.83273
PPP1R12A	na	37.2809	12.5721	34.7733	21.4251	0.337374	0.61623	1.82655
DNMBP	na	9.75252	3.30979	8.85922	5.49274	0.339945	0.620362	1.82489
GM8086	na	7.7121	3.7203	10.2196	8.97262	0.48296	0.878079	1.81812
CEP95	na	5.63709	4.28476	3.84895	5.32216	0.760457	1.38193	1.81723
GM8806	na	12.2771	10.0063	10.6178	15.7277	0.815166	1.48088	1.81666
TSPAN18	na	33.5805	33.6367	1.29404	2.35403	1.00167	1.81386	1.81083
RBM38	na	0.345834	0.359201	3.28488	6.17507	1.03774	1.87761	1.80933
MPHOSPH9	na	3.73501	1.97561	3.4176	3.27518	0.529999	0.958428	1.80836
INO80D	na	13.1071	3.51504	11.2482	5.45863	0.268646	0.485671	1.80785
AKAP9	na	23.5167	9.59581	20.5388	15.1477	0.408253	0.737623	1.80678
RBM6-PS1	na	3.45834	3.28413	2.62127	4.50337	0.949748	1.71572	1.8065
DENND5B	na	3.87334	1.51378	3.0858	2.18345	0.392135	0.708373	1.80645
GNAS	na	19.2975	12.6234	16.8557	19.924	0.654294	1.18194	1.80643
AP4E1	na	4.98001	1.61641	4.18076	2.45638	0.325714	0.58837	1.8064
VPS13C	na	11.2742	3.02756	10.1201	4.91277	0.269082	0.485873	1.80567
GLTSCR1	na	11.7929	5.8242	10.9164	9.72318	0.494231	0.890777	1.80235
CENPU	na	0.691668	0.590117	1.12814	1.73994	0.854937	1.53831	1.79932
TMEM229B	na	5.49876	4.49002	1.45995	2.14933	0.81683	1.46951	1.79903
NIPAL1	na	2.21334	0.564459	12.4427	5.76568	0.257837	0.463739	1.79857
RRAGB	na	5.42959	4.41305	2.12356	3.10459	0.813065	1.46016	1.79587
WDR72	na	0.518751	0.205258	1.12814	0.818794	0.405287	0.727814	1.7958
ANKRD52	na	22.168	7.49192	46.6187	28.2825	0.338212	0.606748	1.79399
SYNDIG1	na	21.4071	26.1704	1.42677	3.13871	1.22242	2.19287	1.79387
GM8682	na	1.34875	0.821032	1.52631	1.6717	0.611151	1.09474	1.79128
GAPDH	na	1.0375	0.307887	2.02402	1.09173	0.302394	0.541285	1.79
ZMYM6	na	14.1792	4.49002	7.76426	4.40102	0.317066	0.567298	1.78921
PCDHB14	na	5.81001	3.33544	1.1945	1.22819	0.574699	1.02801	1.78878
ADAMTS6	na	3.25084	0.821032	7.43245	3.37753	0.254482	0.455044	1.78812
SNED1	na	170.358	48.133	35.4037	17.877	0.282576	0.505065	1.78736
ATN1	na	102.125	65.5799	90.583	103.953	0.642184	1.14758	1.787
XRCC2	na	3.14709	2.00127	3.4176	3.88927	0.636877	1.13767	1.78633
RP23-293I7.1	na	0.691668	0.307887	4.74483	3.82104	0.451781	0.80565	1.78328
GM21092	na	5.70626	3.46373	4.41302	4.7763	0.607582	1.08216	1.7811
2210404O09RIK	na	3.04334	2.38612	2.12356	2.96813	0.784641	1.39615	1.77935
KCNJ15	na	2.83584	1.35983	15.8603	13.5442	0.481052	0.854046	1.77537
KLF9	na	8.40376	3.05321	28.3694	18.3205	0.363949	0.645889	1.77467
GM20633	na	1.14125	0.487488	1.0286	0.784678	0.431329	0.764778	1.77308
SRRM2	na	141.204	53.2131	123.797	82.6641	0.37689	0.667763	1.77177
ZFP526	na	6.22501	3.13018	5.4748	4.87865	0.503509	0.891277	1.77013
PCDHGA2	na	7.26251	2.6427	5.87297	3.78692	0.364615	0.645312	1.76984
ASTE1	na	2.31709	1.38549	3.15216	3.34341	0.599395	1.06051	1.76931
FAM73A	na	6.32876	3.48939	4.51256	4.40102	0.551947	0.975328	1.76707
PLXNA4	na	0.864585	0.307887	2.18992	1.39877	0.362292	0.64011	1.76683
ATAD2B	na	3.66584	0.821032	3.35124	1.33054	0.225739	0.398534	1.76546
CCDC149	na	2.10959	2.00127	4.01485	6.72094	0.948856	1.67261	1.76277
TAF5	na	3.11251	2.20652	2.15674	2.6952	0.709704	1.2487	1.75946
BICD1	na	0.484167	0.179601	2.18992	1.46701	0.381653	0.671149	1.75853
TCF7	na	1.90209	1.56509	2.02402	2.93401	0.823606	1.44774	1.75781
ZFP617	na	3.63126	3.30979	2.78717	4.46925	0.911675	1.6017	1.75688
BHLHE22	na	2.66292	1.41115	1.79175	1.6717	0.5314	0.933312	1.75633
BCL9	na	27.5284	14.9069	29.1989	27.7708	0.541648	0.951103	1.75594
GM5844	na	1.31417	0.513145	2.12356	1.46701	0.394334	0.69204	1.75496
NHSL2	na	3.70042	1.33418	3.55032	2.25168	0.361992	0.635081	1.7544
GM5809	na	0.795418	0.667088	1.06178	1.56936	0.840347	1.4743	1.75439
PDS5A	na	24.243	7.67152	27.0422	15.0112	0.316679	0.555242	1.75332
ZFP935	na	3.11251	1.89864	2.42218	2.59285	0.61105	1.07022	1.75144
CORO6	na	0.691668	0.46183	3.91531	4.60572	0.671684	1.17596	1.75076
SPEN	na	22.8596	6.82483	26.0468	13.6125	0.298811	0.522769	1.7495
HYLS1	na	3.42376	2.89927	3.45078	5.11746	0.847184	1.48182	1.74911
EFHC1	na	5.53334	4.66962	2.12356	3.13871	0.844142	1.47616	1.74872
ZC3H6	na	7.02043	3.66899	4.81119	4.40102	0.523185	0.914895	1.7487
STMN2	na	0.518751	0.333544	29.398	33.3317	0.648653	1.13377	1.74789
6530402F18RIK	na	1.59084	1.02629	1.65903	1.8764	0.646986	1.13037	1.74712
SEMA6A	na	5.98293	4.87488	6.73566	9.58672	0.815057	1.42275	1.74558
PDPR	na	7.60835	1.10326	7.93016	2.01287	0.145948	0.254612	1.74454
GM5345	na	4.18459	2.10389	1.79175	1.56936	0.503766	0.876455	1.73981
KLF3	na	33.4767	9.92936	25.4495	13.1348	0.296781	0.516272	1.73957
PHC1	na	34.2721	26.3243	15.064	20.1287	0.768154	1.33603	1.73927
TERT	na	1.76375	0.872346	1.65903	1.43289	0.496987	0.864377	1.73923
TBCK	na	3.94251	1.00063	5.01027	2.21757	0.255389	0.443535	1.7367
SRSF12	na	7.7121	6.38865	1.59267	2.2858	0.82858	1.43292	1.72937
BC022960	na	3.94251	1.51378	1.0286	0.682329	0.38527	0.666079	1.72886
THBS4	na	0.276667	0.128286	3.91531	3.24106	0.479456	0.828159	1.72729
SRGAP1	na	7.60835	3.5407	6.07205	4.87865	0.465959	0.803731	1.7249
FER1L5	na	1.55625	1.25721	1.29404	1.80817	0.808871	1.39475	1.72431
ARHGEF11	na	29.465	13.3674	23.1601	18.1158	0.453826	0.78228	1.72374
GSTT2	na	0.864585	0.923661	1.29404	2.38815	1.06767	1.84005	1.72342
3110052M02RIK	na	1.93667	0.949318	1.49313	1.26231	0.492378	0.846275	1.71875
BCL7A	na	5.67168	3.07887	5.77342	5.3904	0.543525	0.933753	1.71796
ANKRD24	na	10.375	8.13335	3.4176	4.60572	0.78411	1.3468	1.71761
IL1RL2	na	3.63126	1.38549	3.5835	2.35403	0.38297	0.657709	1.71739
PRKACA-PS1	na	0.864585	0.564459	1.0286	1.15996	0.656201	1.12668	1.71697
ARHGEF9	na	24.4159	16.472	8.46105	9.79141	0.674753	1.15708	1.71482
FLRT1	na	2.00584	1.30852	1.82493	2.04699	0.653803	1.12112	1.71477
MPPED2	na	0.864585	0.769717	1.49313	2.2858	0.891328	1.52792	1.7142
PER2	na	6.29418	2.56572	3.4176	2.38815	0.408423	0.699516	1.71273
SH3RF2	na	3.28542	2.05258	1.55949	1.6717	0.625709	1.07157	1.71257
PCDHGB5	na	1.14125	0.487488	1.75857	1.29642	0.431329	0.73845	1.71203
SLC25A30	na	4.25376	1.35983	8.8924	4.87865	0.321016	0.549056	1.71037
ARSB	na	31.3326	12.3668	27.8053	18.764	0.394857	0.674934	1.70931
CASP8AP2	na	13.2109	5.77288	10.5514	7.88089	0.437337	0.747104	1.7083
FV1	na	1.0375	0.436173	1.45995	1.05761	0.425052	0.72599	1.708
HNRNPUL1	na	89.4327	53.1875	73.3291	74.4079	0.594759	1.01471	1.70609
ZFP605	na	4.59959	2.92493	4.14758	4.50337	0.636572	1.08561	1.7054
GM5898	na	8.40376	6.43997	7.00111	9.1432	0.766552	1.3056	1.70321
KCTD8	na	1.07209	0.821032	1.45995	1.91052	0.767644	1.30686	1.70243
KMT2A	na	28.8425	10.1346	27.2413	16.2735	0.351566	0.597509	1.69957
A830010M20RIK	na	3.66584	2.10389	1.32722	1.29642	0.574891	0.976939	1.69935
GPR19	na	3.52751	2.77098	1.65903	2.21757	0.786044	1.33497	1.69834
SLITRK5	na	2.10959	1.20589	11.5468	11.2243	0.573319	0.972087	1.69554
RFX5	na	13.1417	6.41431	6.63612	5.49274	0.488415	0.827922	1.69512
SMAP1	na	20.9575	14.5477	19.9747	23.5062	0.694272	1.17672	1.6949
GM14403	na	2.04042	0.898004	1.09496	0.818794	0.442398	0.749701	1.69463
LRRC75B	na	10.7554	7.38929	6.5034	7.57385	0.687272	1.16439	1.69422
DIMT1	na	3.21626	2.23218	2.52173	2.96813	0.694826	1.17644	1.69314
MEI4	na	1.31417	0.692746	1.55949	1.39877	0.530133	0.897495	1.69296
MID1	na	36.0705	14.2911	10.6842	7.16445	0.396339	0.670826	1.69256
ARID4A	na	13.2109	5.64459	11.0823	8.01736	0.427633	0.723646	1.69221
TBX5	na	0.691668	0.538802	11.9782	15.83	0.781636	1.32134	1.69049
PCDHGB6	na	32.3701	14.9325	38.2572	29.8178	0.461446	0.77945	1.68915
SPRED3	na	5.49876	3.02756	20.6715	19.2417	0.551273	0.930858	1.68856
A430033K04RIK	na	3.00876	2.54007	1.62585	2.31992	0.844658	1.42471	1.68672
GM7367	na	2.905	3.69464	2.65445	5.69744	1.27104	2.14277	1.68584
GM1862	na	3.49292	2.74533	2.75399	3.65046	0.78648	1.32453	1.68412
BCORL1	na	9.06085	5.10579	13.0068	12.3501	0.563904	0.949547	1.68388
ZFP143	na	6.88209	5.43934	6.6693	8.87027	0.790616	1.3296	1.68173
PWWP2A	na	9.23377	7.31232	6.17159	8.22206	0.792099	1.33179	1.68135
RPUSD2	na	1.55625	0.795375	1.85811	1.60347	0.513703	0.863572	1.68107
RBPSUH-RS3	na	4.84167	1.0776	4.91073	1.84229	0.223912	0.37622	1.68021
GM13719	na	1.31417	0.590117	1.26086	0.95526	0.452534	0.759225	1.67772
GM11889	na	4.15001	2.41178	4.54574	4.43514	0.581995	0.975713	1.6765
ZFP335	na	9.61418	4.36173	9.32375	7.09622	0.454153	0.761305	1.67632
GM16589	na	3.76959	2.20652	3.5835	3.51399	0.586268	0.980647	1.67269
ARHGAP26	na	1.31417	0.872346	1.99084	2.21757	0.665932	1.11341	1.67196
FAM13B	na	25.73	8.98004	27.009	15.7618	0.349222	0.583704	1.67144
GM14176	na	6.46709	5.38802	5.90615	8.22206	0.83336	1.39156	1.66982
GM26813	na	1.27959	0.846689	1.69221	1.8764	0.663892	1.10831	1.66941
RPRD1A	na	9.61418	5.74722	8.92558	8.90439	0.598136	0.997628	1.66789
DLX1	na	4.28834	3.25847	1.42677	1.80817	0.760313	1.26576	1.66479
IL7	na	0.242084	0.230915	1.69221	2.6952	0.955409	1.58979	1.66399
HOXA11OS	na	0.10375	0.0769717	2.28946	2.8999	0.76119	1.26566	1.66273
CCDC66	na	8.16168	6.41431	9.29057	12.1454	0.786125	1.30701	1.6626
GM4887	na	3.04334	1.77035	4.01485	3.88927	0.582862	0.968786	1.66212
OSR2	na	4.35751	5.97814	3.48396	7.94913	1.3712	2.27856	1.66172
DMXL2	na	2.42084	1.33418	2.78717	2.55873	0.552671	0.918285	1.66154
GM10254	na	2.62834	1.77035	2.25628	2.52462	0.6746	1.11849	1.658
HMGA1-RS1	na	1.93667	2.07824	23.4587	41.7244	1.07278	1.77835	1.6577
GM13991	na	2.38625	1.15458	3.35124	2.6952	0.485651	0.804727	1.65701
GM9833	na	3.73501	2.74533	5.01027	6.10684	0.735619	1.2185	1.65643
TRIM65	na	2.62834	1.92429	2.02402	2.45638	0.732985	1.21274	1.65452
BRWD3	na	7.02043	2.97624	7.10065	4.981	0.424627	0.701837	1.65283
SIK2	na	4.42667	1.48812	5.27572	2.93401	0.337426	0.55684	1.65026
SUPT20	na	13.5221	7.15837	12.7745	11.1561	0.529674	0.873389	1.64892
GOLGA1	na	17.1534	12.7517	14.4999	17.7747	0.743516	1.22571	1.64854
LRFN1	na	5.25668	4.0795	2.85353	3.65046	0.776418	1.27846	1.64661
LRBA	na	6.57084	3.84859	12.675	12.2137	0.586234	0.963629	1.64376
NANOS1	na	3.21626	2.36047	5.14299	6.20919	0.734609	1.20697	1.64301
RP23-466K3.1	na	1.66	0.590117	2.09038	1.22819	0.35873	0.589192	1.64244
PCDHGB6	na	5.67168	1.46246	5.87297	2.4905	0.258949	0.424882	1.6408
GM6768	na	4.53042	1.97561	5.14299	3.68457	0.437117	0.716887	1.64003
PCDH11X	na	4.80709	2.02692	1.82493	1.26231	0.422659	0.693111	1.63988
EBF1	na	57.6159	36.7925	16.3912	17.1606	0.638635	1.04691	1.6393
HMMR	na	8.09251	6.67088	10.651	14.3971	0.82451	1.35144	1.63909
5730559C18RIK	na	0.10375	0.102629	2.0572	3.34341	0.990001	1.62269	1.63908
BCL9L	na	56.0597	22.8606	53.7526	35.9246	0.407879	0.668384	1.63868
GM6305	na	2.00584	2.02692	2.0572	3.41164	1.01047	1.65572	1.63857
NAPB	na	3.45834	2.30915	2.02402	2.21757	0.668509	1.09523	1.63832
ZFP229	na	6.67459	3.3611	3.18534	2.62696	0.504189	0.825165	1.63662
MBD6	na	21.9259	13.8293	17.8512	18.4229	0.630869	1.03201	1.63586
DTNA	na	3.11251	1.79601	5.37526	5.08335	0.578166	0.945778	1.63583
POLR2A	na	115.266	55.1631	99.6745	77.956	0.478608	0.782124	1.63416
NCOA6	na	42.8834	20.7054	36.2996	28.6237	0.482931	0.788589	1.63292
DCLRE1C	na	2.42084	1.10326	3.38442	2.52462	0.457614	0.74658	1.63146
BCHE	na	0.553334	0.307887	1.52631	1.39877	0.563041	0.916899	1.62848
PIEZO2	na	41.6384	22.2705	6.90156	6.00449	0.534948	0.870176	1.62666
FGF5	na	0.10375	0.0513145	2.09038	1.80817	0.532378	0.865536	1.62579
ANKRD11	na	80.7868	38.7168	72.2342	56.258	0.4793	0.778854	1.62498
GM6877	na	1.62542	0.846689	1.32722	1.12584	0.523363	0.849221	1.62262
PAPD5	na	11.7584	5.28539	11.4141	8.32441	0.449893	0.729506	1.62151
GM10052	na	4.18459	4.51568	2.68763	4.70807	1.07896	1.74942	1.62139
G6PD2	na	1.48709	0.667088	1.26086	0.921144	0.451679	0.732345	1.62139
PLEKHA5	na	14.94	7.82546	12.5754	10.6784	0.524059	0.849251	1.62053
ALX3	na	0.138334	0.102629	1.72539	2.11522	0.756642	1.22484	1.61879
IRS1	na	39.0792	10.032	7.89698	3.27518	0.256868	0.415358	1.61701
GM6275	na	3.59667	2.92493	2.72081	3.58222	0.813665	1.31563	1.61692
ZNRD1AS	na	4.11542	5.56762	2.82035	6.17507	1.35215	2.18594	1.61664
4930519F09RIK	na	1.55625	1.10326	1.69221	1.94464	0.710481	1.14843	1.61642
RALGPS1	na	2.80125	1.30852	4.64528	3.51399	0.468709	0.756903	1.61487
PIGH	na	8.30001	7.13272	5.87297	8.15383	0.859504	1.38781	1.61467
CEP83	na	14.8363	10.6478	14.8649	17.2288	0.717843	1.15893	1.61447
LMLN	na	1.52167	0.949318	1.92447	1.94464	0.625927	1.01043	1.6143
CD55	na	3.00876	2.56572	28.7676	39.6092	0.853162	1.37676	1.61371
PIK3R3	na	17.7067	9.49318	19.5766	16.9217	0.536355	0.864447	1.61171
ZFP51	na	6.84751	6.20905	5.67388	8.29029	0.906875	1.46045	1.61042
CARM1	na	49.3159	41.0773	48.9414	65.6059	0.83297	1.34044	1.60923
CLK2	na	17.3263	12.9569	11.0823	13.3395	0.74794	1.20352	1.60911
SERPINB6B	na	4.39209	3.41241	5.40844	6.75505	0.77737	1.2486	1.60618
APC	na	36.693	13.547	40.6794	24.1203	0.369344	0.59302	1.60561
PITPNM3	na	3.21626	1.84732	1.62585	1.50112	0.575477	0.923679	1.60507
CNOT3	na	22.7559	15.5226	21.9324	24.018	0.682255	1.09506	1.60505
SLFN9	na	6.08668	2.84795	4.81119	3.61634	0.468632	0.752085	1.60485
RECQL4	na	0.899168	0.590117	1.16132	1.22819	0.659466	1.05717	1.60307
PDZD7	na	3.21626	1.64206	2.45536	2.01287	0.511824	0.820397	1.60289
WDR17	na	0.899168	0.718403	1.06178	1.36466	0.800821	1.28302	1.60213
PGAM2	na	1.41792	1.28286	1.52631	2.21757	0.90531	1.45042	1.60213
POM121	na	18.0179	6.05511	21.1029	11.3608	0.336369	0.538535	1.60103
TVP23A	na	9.85627	6.363	6.90156	7.13033	0.64588	1.03311	1.59953
GM16425	na	0.933752	0.46183	1.0286	0.818794	0.499093	0.797678	1.59825
R3HDM1	na	31.3326	21.1416	43.4998	46.876	0.674835	1.0776	1.59683
GM4202	na	8.9571	4.54133	10.7837	8.73381	0.50747	0.810056	1.59626
ZFP959	na	2.97417	2.07824	2.68763	3.00225	0.699608	1.1167	1.59617
GM15773	na	2.04042	1.46246	2.32264	2.66108	0.717905	1.14519	1.59518
GM11945	na	2.905	3.02756	2.68763	4.46925	1.04206	1.66084	1.59379
ZDHHC15	na	3.11251	2.48875	1.79175	2.2858	0.800136	1.27445	1.59279
RYBP	na	8.40376	3.64333	6.17159	4.26455	0.4341	0.691416	1.59276
SIX4	na	6.64001	2.79664	5.6407	3.78692	0.42191	0.671844	1.59239
CACNB2	na	4.59959	2.59138	2.62127	2.35403	0.564188	0.898377	1.59233
PHACTR4	na	15.5279	6.41431	21.9324	14.4312	0.413399	0.658119	1.59197
DGKQ	na	5.77543	2.6427	7.532	5.49274	0.458362	0.729556	1.59166
HOXD9	na	0.830001	0.821032	3.68305	5.79979	0.989301	1.57342	1.59044
SLC5A6	na	3.28542	2.84795	1.06178	1.46701	0.867185	1.37866	1.58981
TMF1	na	23.655	11.007	33.4792	24.7685	0.465501	0.739883	1.58943
SLC6A9	na	13.695	5.95248	10.6178	7.33503	0.434991	0.691068	1.58869
PBP2	na	0.172917	0.102629	1.82493	1.77405	0.61231	0.972248	1.58784
CHML	na	3.25084	1.61641	5.17617	4.09397	0.498521	0.791264	1.58722
RAET1D	na	3.97709	3.07887	3.21852	3.95751	0.774626	1.22901	1.58658
GM7389	na	10.5825	5.36236	7.59836	6.10684	0.50711	0.803922	1.5853
FAM221B	na	35.8284	43.5147	29.2653	56.3262	1.21448	1.92441	1.58456
ARHGAP21	na	58.6534	26.6322	49.7045	35.7199	0.454139	0.718692	1.58254
EIF3J2	na	7.64293	5.77288	9.15785	10.9514	0.755591	1.19567	1.58243
SEC61A2	na	10.3404	4.6183	12.6418	8.9385	0.447074	0.707253	1.58196
AMER1	na	9.23377	3.92556	6.23795	4.19632	0.425652	0.673147	1.58145
BRPF3	na	16.7038	8.82609	21.1029	17.6382	0.528626	0.835885	1.58124
PGAM1-PS2	na	0.830001	0.564459	1.29404	1.39877	0.683269	1.08041	1.58124
DMD	na	14.3175	6.33734	25.4827	17.8429	0.442954	0.700295	1.58096
MYLK	na	35.3788	19.6791	35.0719	30.8412	0.556345	0.879401	1.58068
AUTS2	na	21.58	15.5226	7.8638	8.9385	0.719414	1.13652	1.57978
HOXC4	na	0.691668	0.513145	11.016	12.9642	0.744986	1.17673	1.57953
KIF20B	na	5.91376	2.8223	7.23337	5.45863	0.477982	0.754929	1.57941
CEP78	na	5.15293	4.02819	4.11439	5.08335	0.782083	1.23502	1.57915
DDX26B	na	3.59667	1.28286	2.72081	1.53524	0.358176	0.565597	1.5791
TRP53COR1	na	2.49	2.00127	1.82493	2.31992	0.804378	1.26999	1.57885
RNPC3	na	10.0984	9.03135	9.68874	13.6807	0.894427	1.41166	1.57829
SYNGR1	na	0.657084	0.564459	1.12814	1.53524	0.860812	1.3582	1.57781
GM12929	na	4.73792	2.20652	4.08121	3.00225	0.466659	0.736168	1.57753
CCNB1	na	3.38917	2.20652	3.28488	3.37753	0.651912	1.02813	1.5771
2810410L24RIK	na	2.73209	1.66772	1.06178	1.02349	0.611612	0.964224	1.57653
LENG8	na	28.9117	16.8055	19.5102	17.877	0.581391	0.916327	1.57609
AI480526	na	2.10959	0.564459	1.69221	0.716445	0.270468	0.42622	1.57587
CHD1	na	25.6955	12.803	28.0708	22.0392	0.498422	0.785194	1.57536
GM10184	na	0.691668	0.307887	1.39359	0.989376	0.451781	0.711685	1.57529
MS4A4D	na	0.518751	0.513145	1.85811	2.8999	0.989365	1.55815	1.5749
SATB1	na	0.345834	0.153943	8.22879	5.93626	0.458268	0.721685	1.57481
ATXN2L	na	85.836	62.1162	89.1895	101.599	0.723689	1.13912	1.57405
ABCD2	na	1.93667	1.79601	1.49313	2.18345	0.927682	1.45975	1.57355
NAP1L5	na	0.172917	0.102629	1.0286	0.989376	0.61231	0.962177	1.57139
ZBTB20	na	20.5771	7.20969	9.85464	5.42451	0.350639	0.550835	1.57095
PRDM2	na	34.2721	20.0383	29.5639	27.1567	0.584784	0.918598	1.57083
ZFP661	na	2.76667	2.10389	1.82493	2.18345	0.761166	1.19556	1.57069
ZFP236	na	18.0525	9.23661	12.7745	10.269	0.511878	0.803997	1.57068
AAED1	na	11.9659	9.05701	8.69332	10.3373	0.757075	1.18892	1.57042
PLCE1	na	30.9176	16.5746	6.03887	5.08335	0.536215	0.841991	1.57025
GM18588	na	6.91668	3.87424	8.06289	7.09622	0.560663	0.880233	1.56999
1700003E16RIK	na	1.4525	1.46246	1.22768	1.94464	1.00682	1.58003	1.56933
EPC2	na	21.2342	12.6747	15.6944	14.7042	0.597058	0.936938	1.56926
EPB4.1L5	na	2.62834	1.33418	2.82035	2.25168	0.509178	0.798968	1.56913
GM10080	na	26.733	40.8463	35.636	85.4275	1.52777	2.3969	1.56888
PCGF1	na	2.83584	3.61767	1.95766	3.92339	1.27489	1.99985	1.56865
CCNJ	na	3.42376	1.89864	2.82035	2.45638	0.555636	0.871332	1.56817
GM9800	na	6.05209	5.79854	4.67846	7.02798	0.958162	1.5013	1.56685
D3ERTD254E	na	11.1359	6.31168	8.29515	7.36915	0.567115	0.888481	1.56667
SEMA6D	na	1.62542	0.718403	1.22768	0.852911	0.444843	0.696803	1.5664
NUPL1	na	19.3667	9.59581	22.9942	17.8429	0.495698	0.776057	1.56558
HSPB7	na	0.172917	0.205258	10.0205	18.4911	1.17838	1.84461	1.56537
PCGF2	na	37.0388	46.2857	23.4919	45.9548	1.2496	1.95586	1.56519
1700010I14RIK	na	1.245	1.35983	1.09496	1.8764	1.09162	1.70825	1.56488
FOSB	na	2.59375	2.30915	1.85811	2.59285	0.890628	1.39364	1.56479
SIGLECG	na	0.415001	0.28223	9.921	10.6443	0.686405	1.07285	1.56299
CYP2D22	na	1.72917	1.51378	1.69221	2.31992	0.876037	1.36911	1.56285
KIF15	na	3.90792	1.64206	4.51256	2.96813	0.421429	0.658383	1.56226
GM8522	na	0.968335	0.769717	1.09496	1.36466	0.796648	1.24444	1.56209
GM12097	na	3.90792	2.2835	3.88213	3.54811	0.585214	0.914145	1.56207
GAREM	na	5.08376	2.25784	8.49423	5.90214	0.445043	0.695142	1.56197
MTUS1	na	14.6634	8.33861	15.1304	13.4419	0.568916	0.888466	1.56168
NEXN	na	23.0325	14.9325	77.0122	77.9219	0.648451	1.01181	1.56035
2210018M11RIK	na	17.0496	8.44123	16.5571	12.7937	0.495346	0.772813	1.56015
MAP3K3	na	51.9788	27.8894	33.9106	28.3849	0.536628	0.837091	1.55991
NUP98	na	19.3667	7.38929	19.9415	11.8725	0.381814	0.595536	1.55976
RPL28	na	4.18459	3.97687	5.70706	8.46087	0.950461	1.48182	1.55905
PTPN3	na	5.22209	3.33544	4.24712	4.23044	0.639297	0.99608	1.55809
CLSPN	na	3.97709	2.30915	5.27572	4.7763	0.581496	0.905487	1.55717
GABRE	na	1.72917	1.15458	2.52173	2.62696	0.669309	1.04159	1.55622
GM8181	na	2.00584	1.18023	2.78717	2.55873	0.590112	0.918285	1.55612
HOXA7	na	10.9629	9.26227	17.2539	22.6874	0.84499	1.31476	1.55595
LIPT2	na	2.73209	4.13082	1.82493	4.29867	1.5104	2.34932	1.55543
CAPRIN2	na	6.19043	4.00253	3.01943	3.03636	0.647046	1.00559	1.55413
4930503L19RIK	na	8.16168	4.2591	9.7551	7.91501	0.522332	0.811534	1.55367
THOC2	na	33.2692	11.7254	29.4644	16.1371	0.352602	0.547809	1.55362
GM12346	na	7.22793	3.1815	13.3054	9.10909	0.440816	0.684813	1.55351
PLEKHG1	na	14.525	7.23534	4.2803	3.30929	0.498419	0.773589	1.55209
GM14026	na	4.46126	2.84795	5.54116	5.49274	0.639053	0.991276	1.55116
PITX2	na	3.66584	3.61767	4.6121	7.0621	0.98689	1.53025	1.55057
LRP8	na	1.59084	0.692746	10.9496	7.43738	0.438419	0.679483	1.54985
CEP128	na	3.70042	2.00127	3.2517	2.72931	0.541859	0.839763	1.54978
RRAGD	na	0.726251	0.436173	2.25628	2.11522	0.605139	0.937712	1.54958
ARHGEF6	na	17.015	12.7517	8.46105	9.82553	0.749558	1.16111	1.54905
TBC1D8B	na	23.828	8.41558	27.8053	15.2159	0.353408	0.547367	1.54882
GM7887	na	7.78126	5.72157	8.66014	9.85965	0.735585	1.13838	1.54758
RMND1	na	3.73501	3.5407	2.32264	3.41164	0.948094	1.46718	1.5475
CYB5D1	na	1.66	0.898004	2.72081	2.2858	0.543271	0.840609	1.54731
FIGNL2	na	5.42959	3.84859	1.99084	2.18345	0.709266	1.09635	1.54575
AI429214	na	2.52459	2.43744	1.09496	1.63759	0.965594	1.4918	1.54496
PKNOX2	na	18.7096	16.2924	5.80661	7.81266	0.870859	1.34498	1.54443
GNPDA2	na	14.1446	9.57015	14.334	14.9771	0.676785	1.04484	1.54383
ZCCHC6	na	32.2317	15.4713	30.5262	22.6192	0.480138	0.741049	1.54341
CPSF7	na	31.4709	20.1409	26.4118	26.065	0.640082	0.986873	1.54179
BC068281	na	2.17875	1.0776	2.58809	1.97875	0.496534	0.765322	1.54133
DCLRE1A	na	11.8275	7.38929	6.76884	6.51624	0.62502	0.962727	1.54032
PPP1R9A	na	3.56209	1.71904	1.55949	1.15996	0.483807	0.745177	1.54024
IRF2	na	21.165	20.2692	11.9782	17.6723	0.957692	1.47504	1.5402
ALG10B	na	27.3555	6.51694	31.3225	11.4972	0.238465	0.367229	1.53997
GM15359	na	2.31709	0.821032	2.0572	1.12584	0.356665	0.549107	1.53956
PARVB	na	2.10959	1.56509	16.6235	19.0028	0.742917	1.14306	1.53861
GPATCH2	na	9.1646	6.5426	9.65555	10.6102	0.71416	1.09879	1.53857
GM11488	na	4.18459	3.02756	2.78717	3.10459	0.724054	1.11355	1.53793
XYLT1	na	2.00584	0.564459	1.49313	0.648212	0.284399	0.43729	1.53759
5430435G22RIK	na	2.2825	2.30915	4.84437	7.53973	1.01163	1.55543	1.53754
CEP162	na	7.95418	5.05448	6.6693	6.51624	0.635833	0.977078	1.53669
ANKHD1	na	21.7184	8.44123	18.8466	11.2584	0.388904	0.597551	1.5365
GPLD1	na	3.07792	2.23218	3.11898	3.47988	0.72597	1.1154	1.53643
GPX3	na	59.2414	80.5124	71.0728	148.406	1.35901	2.08796	1.53639
IPO7	na	44.6472	15.5226	77.2776	41.2809	0.347796	0.53424	1.53607
GM13880	na	3.00876	3.38676	1.89129	3.27518	1.12528	1.72848	1.53604
TUBGCP6	na	7.12418	3.87424	7.43245	6.20919	0.544352	0.835601	1.53504
ATP2B1	na	35.863	18.4989	49.24	38.9951	0.515934	0.791974	1.53503
GM12538	na	3.28542	3.7203	2.15674	3.75281	1.13203	1.73717	1.53456
JADE2	na	11.3779	9.69844	2.18992	2.86578	0.852499	1.30745	1.53366
INVS	na	16.2888	10.1859	12.675	12.1454	0.625527	0.958249	1.53191
GM5702	na	2.14417	1.43681	1.85811	1.91052	0.671383	1.02808	1.53128
INSL6	na	0.899168	1.15458	1.16132	2.2858	1.28143	1.96134	1.53059
TIMP3	na	334.525	125.926	379.619	218.652	0.376447	0.575987	1.53006
USP42	na	16.8421	9.59581	12.4427	10.849	0.569965	0.872003	1.52992
ISG20	na	7.74668	7.23534	4.24712	6.07272	0.934064	1.429	1.52987
8430429K09RIK	na	3.38917	5.18276	2.52173	5.90214	1.52791	2.33608	1.52894
CYSTM1	na	0.380417	0.333544	3.98167	5.35628	0.879442	1.34451	1.52882
WSCD2	na	19.5742	18.6785	1.26086	1.84229	0.954259	1.45809	1.52798
EDNRB	na	3.42376	1.51378	5.34208	3.61634	0.443502	0.67746	1.52752
RBAK	na	5.94834	3.30979	4.41302	3.75281	0.557046	0.850678	1.52712
FGD6	na	22.8596	8.92872	5.20935	3.10459	0.390813	0.596614	1.5266
FRS2	na	46.6876	19.012	47.4151	29.4766	0.407324	0.621738	1.5264
SCAF11	na	72.7289	37.7162	57.9665	45.8866	0.518641	0.791635	1.52636
EEA1	na	25.315	9.03135	23.4919	12.7937	0.356971	0.544762	1.52607
GM11808	na	31.713	31.1222	27.0422	40.4962	0.981378	1.49737	1.52578
HYAL1	na	4.66876	2.61704	5.14299	4.40102	0.561331	0.855966	1.52489
GM9531	na	5.74084	4.82356	5.67388	7.2668	0.840451	1.28033	1.52339
BACH2	na	0.726251	0.487488	1.29404	1.33054	0.67499	1.02802	1.52302
POLI	na	6.95126	7.64586	2.95307	4.94688	1.0998	1.67325	1.52141
PHF12	na	34.7217	20.4745	30.6589	27.4978	0.589773	0.896925	1.5208
SH3D21	na	1.0375	0.769717	1.65903	1.8764	0.743964	1.13037	1.51938
SAMD5	na	0.726251	0.359201	2.15674	1.63759	0.500364	0.760221	1.51934
TMEM131	na	60.3826	31.1992	59.9905	47.0807	0.516759	0.784832	1.51876
GM7160	na	0.657084	0.230915	1.1945	0.648212	0.359594	0.54585	1.51796
HOXD10	na	0.172917	0.128286	4.11439	4.70807	0.753829	1.144	1.51758
SMS	na	3.14709	2.12955	4.01485	4.12809	0.677532	1.02815	1.51748
GM6055	na	2.87042	2.74533	3.21852	4.67395	0.956546	1.45103	1.51695
PCDH10	na	6.05209	3.28413	1.65903	1.36466	0.543276	0.823455	1.51572
A630052C17RIK	na	2.21334	1.23155	1.85811	1.56936	0.558095	0.845294	1.51461
INPP5E	na	27.148	20.8337	14.2677	16.5806	0.767484	1.16201	1.51406
KDM7A	na	9.61418	3.56636	6.80202	3.82104	0.371496	0.56229	1.51358
NCOR1	na	67.2647	33.0209	65.5649	48.7183	0.490973	0.743087	1.5135
BAZ1A	na	4.18459	1.66772	8.85922	5.35628	0.399741	0.604973	1.51341
KNG1	na	1.83292	2.15521	2.72081	4.84453	1.17503	1.77815	1.51328
RAB11FIP2	na	12.1042	6.5426	8.59378	7.02798	0.540842	0.817977	1.51242
RP23-123L9.5	na	4.56501	1.71904	6.63612	3.78692	0.377711	0.571195	1.51226
ZFP609	na	17.0842	6.5426	21.2688	12.316	0.383265	0.579232	1.51131
GM8494	na	1.83292	2.4631	1.49313	3.03636	1.34224	2.02779	1.51074
SYNC	na	2.97417	1.84732	10.7505	10.0985	0.622186	0.939394	1.50983
SLC7A7	na	2.14417	1.56509	2.25628	2.4905	0.730981	1.10342	1.50951
CAPN15	na	6.12126	2.51441	5.44162	3.37753	0.411573	0.621268	1.5095
GM16536	na	5.94834	3.69464	4.54574	4.26455	0.621655	0.938256	1.50929
PCDHGA6	na	6.70918	2.02692	2.91989	1.33054	0.302983	0.457239	1.50913
GM17435	na	1.14125	1.28286	1.52631	2.59285	1.12318	1.69496	1.50907
GM5540	na	3.66584	2.02692	2.65445	2.21757	0.553942	0.835934	1.50906
MOB3A	na	6.15584	4.46436	11.7459	12.8619	0.725597	1.09494	1.50902
MIS18BP1	na	2.80125	1.64206	3.35124	2.96813	0.587423	0.885966	1.50822
GM6206	na	11.9313	7.92809	15.8935	15.9324	0.664715	1.00244	1.50808
CHERP	na	35.5517	25.5803	38.5559	41.8267	0.719589	1.08482	1.50755
MARK4	na	19.9892	15.6509	25.9804	30.6707	0.78306	1.18047	1.50751
POLM	na	6.84751	6.59391	6.43704	9.3479	0.96301	1.45162	1.50738
CHST3	na	1.83292	0.974975	1.06178	0.852911	0.534056	0.804825	1.50701
STXBP4	na	21.7184	11.9306	15.993	13.2372	0.549507	0.827773	1.50639
NOTCH1	na	12.4154	3.82293	5.74024	2.66108	0.308384	0.464365	1.5058
GM7935	na	3.90792	3.1815	4.81119	5.90214	0.814513	1.22636	1.50564
GM12799	na	2.49	2.66835	1.85811	3.00225	1.07139	1.61298	1.50551
DUSP1	na	21.7184	16.472	40.8453	46.6372	0.758527	1.14177	1.50525
CDKAL1	na	7.57376	6.87614	5.34208	7.30092	0.907992	1.36611	1.50454
INHA	na	2.83584	1.89864	1.72539	1.73994	0.670489	1.00839	1.50396
KIF26B	na	3.97709	1.61641	7.79744	4.7763	0.407678	0.612963	1.50355
DNAJC28	na	2.45542	1.94995	1.62585	1.94464	0.794842	1.19507	1.50353
GLTSCR1L	na	19.2629	8.41558	9.921	6.51624	0.437124	0.657102	1.50324
ZSCAN22	na	6.12126	5.28539	4.41302	5.73156	0.863635	1.29822	1.5032
GGA3	na	5.56793	3.38676	9.02512	8.25618	0.608851	0.914878	1.50263
SUV39H2	na	0.933752	0.692746	1.89129	2.11522	0.744192	1.11787	1.50213
CEP135	na	4.49584	2.12955	5.07663	3.61634	0.474651	0.712825	1.50179
HOXA4	na	3.14709	3.1815	1.59267	2.42227	1.0109	1.51816	1.50178
ZFHX2	na	2.80125	1.10326	4.31348	2.55873	0.395654	0.593984	1.50127
GABRB3	na	0.242084	0.128286	1.45995	1.19407	0.545657	0.818929	1.50081
RAD18	na	6.32876	4.69528	9.15785	10.2008	0.742236	1.11378	1.50058
ST3GAL1	na	17.7413	11.7767	49.6382	49.4347	0.66396	0.995902	1.49994
LCA5	na	6.50168	2.77098	6.23795	3.99162	0.426934	0.640376	1.49994
GALNT3	na	1.66	1.18023	2.52173	2.6952	0.712435	1.06856	1.49987
ZFP949	na	7.02043	6.33734	3.55032	4.81042	0.902816	1.35409	1.49985
MIR17HG	na	0.830001	0.0513145	1.0286	0.102349	0.0712048	0.106783	1.49966
IGF2BP2	na	15.9429	10.93	83.3497	85.6663	0.685734	1.02779	1.49882
MAMLD1	na	8.1271	5.15711	7.532	7.16445	0.634934	0.951256	1.4982
TMEM17	na	7.40085	8.74912	2.28946	4.05985	1.18197	1.77046	1.49788
AKAP17B	na	7.15876	4.77225	3.51714	3.51399	0.66702	0.999106	1.49786
MAP1B	na	15.8738	7.74849	80.3634	58.7826	0.488402	0.731488	1.49772
PCDHGB1	na	1.52167	0.513145	3.15216	1.60347	0.340856	0.509993	1.49621
TESK1	na	15.7009	12.8286	16.8557	20.6063	0.817163	1.2224	1.49591
NUDT12	na	3.18167	2.20652	3.31806	3.44576	0.694316	1.03839	1.49556
DENND4C	na	7.78126	2.6427	9.12467	4.63983	0.340334	0.508945	1.49543
WASL	na	43.4022	20.9107	43.4334	31.2848	0.481889	0.720347	1.49484
YPEL4	na	7.22793	7.72283	2.75399	4.40102	1.06839	1.59624	1.49406
PALLD	na	53.2238	22.1422	193.343	120.192	0.416112	0.621668	1.49399
CDKL2	na	3.32001	2.20652	5.01027	4.981	0.665459	0.994167	1.49396
DENND1A	na	20.2659	15.8562	14.8317	17.3311	0.782498	1.16842	1.4932
GM11652	na	2.73209	2.05258	4.31348	4.84453	0.752047	1.12288	1.49309
FAM161A	na	2.10959	1.77035	1.65903	2.0811	0.839829	1.25313	1.49212
RP23-241H7.1	na	33.5113	37.9214	45.9551	77.5808	1.13157	1.68806	1.49179
OSGEPL1	na	4.59959	4.97751	2.78717	4.50337	1.08201	1.6139	1.49157
SKIDA1	na	3.21626	1.92429	2.52173	2.25168	0.599347	0.893269	1.4904
GNPDA1	na	7.0896	6.02945	6.96793	8.83615	0.850642	1.2678	1.4904
HIVEP1	na	17.7413	6.74786	23.5914	13.3736	0.38064	0.56704	1.4897
MALAT1	na	14.3867	2.41178	49.0741	12.2819	0.168124	0.250401	1.48938
ZBTB39	na	6.95126	3.61767	6.07205	4.70807	0.521011	0.775677	1.48879
GPNMB	na	8.02335	5.74722	14.9976	16.0006	0.716609	1.06684	1.48873
CDS1	na	0.795418	0.615774	1.32722	1.53524	0.776507	1.15575	1.48839
UGT1A7C	na	2.62834	1.43681	5.44162	4.43514	0.548101	0.815324	1.48754
GPR116	na	15.6317	10.5451	1.39359	1.39877	0.674774	1.0037	1.48746
BRSK1	na	8.9571	7.67152	12.4759	15.8983	0.856608	1.27413	1.48742
CTXN1	na	8.61126	13.1622	25.5822	58.1344	1.52797	2.27203	1.48696
EPS15L1	na	25.0038	21.0903	19.9084	24.9732	0.843535	1.2543	1.48696
CCPG1OS	na	3.83876	3.97687	2.25628	3.47988	1.0359	1.5403	1.48692
CD2AP	na	26.6984	15.6253	25.4163	22.1074	0.585382	0.869855	1.48596
IRF7	na	3.07792	3.20716	2.15674	3.34341	1.04187	1.54809	1.48587
GM5578	na	5.53334	2.71967	5.74024	4.19632	0.492275	0.731427	1.48581
GM684	na	6.01751	5.02882	2.389	2.96813	0.835926	1.24157	1.48526
ETL4	na	23.413	14.445	12.5091	11.4631	0.617104	0.916439	1.48506
GM6640	na	1.31417	0.436173	1.99084	0.989376	0.336135	0.499074	1.48474
GM1815	na	5.01459	5.49065	4.74483	7.71031	1.09478	1.62389	1.48331
CCDC55	na	21.6838	21.5521	21.136	31.1483	0.993929	1.47352	1.48252
ZBTB37	na	5.81001	2.12955	4.57892	2.4905	0.367444	0.544738	1.48251
GM7099	na	3.70042	4.36173	3.94849	6.89152	1.17831	1.74378	1.4799
BOD1L	na	32.0934	15.3943	31.057	22.0392	0.479809	0.709715	1.47916
GM15790	na	1.59084	1.46246	1.32722	1.80817	0.919728	1.3601	1.4788
RREB1	na	15.1129	6.31168	10.7173	6.61859	0.417957	0.617858	1.47828
SMARCC2	na	124.846	85.7209	79.5339	80.7195	0.686634	1.0149	1.47809
MNDA	na	2.76667	2.10389	2.45536	2.76343	0.761166	1.12504	1.47805
MAB21L1	na	0.311251	0.179601	1.92447	1.6717	0.588122	0.869225	1.47797
SOX12	na	23.9317	21.2955	16.2917	21.4251	0.889884	1.31493	1.47765
CRYBG3	na	4.59959	2.51441	8.52741	6.89152	0.547484	0.808349	1.47648
CNOT4	na	19.0209	11.5201	20.6383	18.457	0.60583	0.894349	1.47624
FOXM1	na	11.8967	8.38992	15.6944	16.3418	0.705439	1.04122	1.476
NUDT17	na	2.10959	2.4631	1.95766	3.37753	1.16691	1.7222	1.47586
NFAT5	na	85.8706	29.6341	68.5511	34.9011	0.345166	0.509185	1.47519
SCAPER	na	15.4242	8.46689	11.2482	9.10909	0.549181	0.809966	1.47486
IRAK3	na	13.9025	11.9306	4.87755	6.17507	0.858248	1.26556	1.47459
CCK	na	0.0691668	0.0769717	4.64528	7.53973	1.10065	1.62197	1.47365
ZFP846	na	6.19043	5.61894	3.4176	4.5716	0.907807	1.33684	1.4726
GM8392	na	2.2825	2.05258	2.52173	3.34341	0.899635	1.32476	1.47255
MRPS36-PS1	na	1.69459	1.84732	1.29404	2.0811	1.08969	1.6043	1.47226
GM5595	na	2.17875	1.30852	1.1945	1.05761	0.602113	0.886197	1.47181
CELSR2	na	1.10667	0.333544	1.82493	0.818794	0.306647	0.451192	1.47137
XPO4	na	3.80417	0.872346	5.93933	2.01287	0.231007	0.339837	1.47111
CDC42BPA	na	127.82	61.0643	77.2444	54.2792	0.47777	0.702727	1.47085
SFRP4	na	1.52167	1.48812	3.98167	5.73156	0.978073	1.43856	1.47081
PPWD1	na	8.64585	6.33734	4.81119	5.1857	0.733251	1.07771	1.46976
TOX	na	61.9734	45.285	5.97251	6.41389	0.730753	1.0738	1.46944
ASH1L	na	54.6072	22.4244	43.9311	26.5085	0.41074	0.603485	1.46926
RUNX3	na	8.85335	6.59391	4.6121	5.04923	0.745035	1.09461	1.4692
KSR1	na	7.26251	5.33671	3.28488	3.54811	0.735135	1.07993	1.46902
PHF3	na	53.7426	31.3018	48.0123	41.0762	0.582505	0.855559	1.46876
ARID1A	na	45.6847	26.3757	41.2767	35.0035	0.577419	0.848051	1.46869
EIF3A	na	195.119	103.04	232.828	180.51	0.528104	0.775301	1.46808
PEMT	na	2.66292	2.84795	1.69221	2.66108	1.06927	1.56973	1.46804
UBR2	na	50.6993	27.7098	44.9929	36.0952	0.546628	0.802279	1.46769
IKZF2	na	2.2825	0.74406	4.11439	1.97875	0.32845	0.48199	1.46746
ZFP292	na	22.168	7.49192	16.0262	7.94913	0.338212	0.496271	1.46734
HUWE1	na	112.569	47.3633	111.089	68.574	0.420792	0.61732	1.46704
GM16433	na	2.17875	1.59075	1.52631	1.63759	0.731153	1.07251	1.46687
ZFP763	na	4.98001	3.07887	1.69221	1.53524	0.618887	0.907696	1.46666
GM8741	na	2.42084	2.10389	1.92447	2.45638	0.869529	1.27519	1.46653
GM7353	na	0.864585	0.564459	1.0286	0.989376	0.656201	0.962177	1.46628
SIPA1L3	na	10.5134	6.92746	24.2882	23.4721	0.659192	0.966411	1.46605
RBM41	na	3.14709	1.15458	2.78717	1.50112	0.368553	0.539967	1.4651
DOCK5	na	16.6346	6.49128	38.6554	22.1074	0.390535	0.572004	1.46467
SAP130	na	32.8888	26.2474	27.1417	31.7283	0.798115	1.16893	1.46462
GM5499	na	5.49876	3.77162	5.90615	5.93626	0.686381	1.00509	1.46433
PRRC2C	na	63.2876	26.8888	69.9115	43.4984	0.424943	0.622238	1.46429
LNPEP	na	13.0379	4.0795	16.8226	7.71031	0.313336	0.458601	1.46361
NCOA1	na	21.165	12.8286	9.42329	8.35852	0.606279	0.887107	1.4632
MDN1	na	14.4559	5.8242	13.5377	7.98324	0.403241	0.589959	1.46304
FBXO36	na	7.95418	11.8023	2.62127	5.69744	1.48328	2.1698	1.46284
ABAT	na	35.0676	29.4032	7.76426	9.51848	0.838512	1.22569	1.46175
NOL4L	na	8.02335	6.59391	5.3089	6.37977	0.822027	1.2014	1.4615
MTIF3	na	7.33168	11.5971	5.90615	13.6466	1.58111	2.30871	1.46018
GM10307	na	1.66	1.59075	1.09496	1.53524	0.958491	1.39904	1.45963
CIC	na	68.1984	42.7193	87.1986	79.7301	0.626443	0.914359	1.4596
ZBTB34	na	8.40376	3.97687	6.56976	4.53748	0.47375	0.691056	1.45869
RAB5B	na	30.6409	18.3962	29.0994	25.485	0.600492	0.875826	1.45852
NEK3	na	2.38625	1.77035	1.22768	1.33054	0.742799	1.08321	1.45829
WAC	na	45.3734	27.325	41.8076	36.7093	0.602298	0.878078	1.45788
PLXNA2	na	8.92252	5.56762	10.6842	9.72318	0.62435	0.910127	1.45772
MLX	na	10.375	9.23661	11.3809	14.7724	0.890363	1.29778	1.45758
VSTM5	na	0.587918	0.795375	1.55949	3.07048	1.34791	1.96372	1.45687
PRR12	na	45.2005	28.4795	28.7676	26.4061	0.63014	0.917936	1.45672
SLC25A45	na	4.63417	5.13145	1.16132	1.8764	1.10711	1.61134	1.45544
CEP192	na	14.5942	7.31232	12.675	9.24555	0.501329	0.729612	1.45535
ARL5B	na	17.7067	7.46626	12.8409	7.88089	0.421937	0.613986	1.45516
ASXL2	na	14.2138	6.79917	15.8271	11.0196	0.478658	0.696408	1.45492
ITSN2	na	11.8967	4.41305	14.5331	7.84678	0.37139	0.54019	1.45451
D130017N08RIK	na	3.90792	1.20589	2.35582	1.05761	0.310056	0.450888	1.45422
GM15975	na	8.36918	7.261	7.73108	9.7573	0.867721	1.2618	1.45416
SLTM	na	29.1884	18.7811	27.6726	25.8944	0.643547	0.935759	1.45407
HNRNPH2	na	24.8655	22.3475	25.5159	33.3317	0.898769	1.30621	1.45334
SLC2A6	na	1.0375	0.769717	3.84895	4.1622	0.743964	1.08121	1.45331
ELL2	na	54.2268	36.1767	43.9975	42.6455	0.667189	0.969278	1.45278
SF3B4	na	7.33168	6.49128	9.52283	12.2478	0.885506	1.2859	1.45216
TTLL5	na	7.36626	5.8242	9.35693	10.7467	0.790896	1.14839	1.45201
DYRK2	na	5.18751	2.77098	6.5034	5.04923	0.534916	0.776687	1.45198
DIAP2	na	9.47585	4.23345	15.0308	9.7573	0.447251	0.649349	1.45187
CLCN6	na	9.06085	4.2591	8.59378	5.86803	0.470545	0.683132	1.45179
GNAO1	na	19.8163	13.0082	4.08121	3.88927	0.656586	0.953066	1.45155
EIF4ENIF1	na	34.1338	29.9933	34.2092	43.6349	0.878728	1.27546	1.45149
OASL2	na	4.39209	4.33607	1.59267	2.2858	0.987271	1.43292	1.4514
AKAP12	na	108.004	53.521	97.4514	70.0751	0.495586	0.719102	1.45101
CIZ1	na	28.1509	20.2692	20.7047	21.6298	0.720104	1.04466	1.45071
SH3BGR	na	0.138334	0.153943	2.65445	4.26455	1.1064	1.60466	1.45035
CEP290	na	5.94834	2.4631	4.71165	2.83166	0.414905	0.601701	1.45021
ANK3	na	20.2659	10.1603	15.064	10.9514	0.501555	0.727142	1.44977
GM6419	na	5.04918	4.77225	3.48396	4.7763	0.945245	1.37005	1.44941
PLEKHA6	na	2.10959	1.69338	3.2517	3.78692	0.803487	1.16418	1.4489
TRIM33	na	25.073	13.1622	23.1932	17.6382	0.525113	0.760575	1.4484
2016-09-05	na	33.2692	29.8907	52.2263	67.9258	0.898474	1.30056	1.44752
ZFP148	na	42.9526	22.9889	38.7218	29.9883	0.535306	0.774506	1.44685
CDH2	na	38.6642	21.6034	53.5535	43.2937	0.55884	0.808451	1.44666
PARD3B	na	15.6317	8.33861	4.11439	3.17283	0.533692	0.771618	1.44581
MFSD2A	na	0.242084	0.205258	2.98625	3.68457	0.852971	1.23319	1.44576
9930021J03RIK	na	23.655	7.51757	19.3775	8.90439	0.318042	0.459756	1.44559
NRK	na	56.7513	37.8701	6.96793	6.72094	0.667348	0.964596	1.44542
HMCN1	na	6.98585	2.23218	3.2517	1.50112	0.320345	0.463027	1.4454
GM9770	na	12.5538	5.72157	10.7173	7.0621	0.456128	0.659208	1.44523
GPR45	na	0.484167	0.384859	1.89129	2.18345	0.798378	1.15379	1.44517
TMEM200A	na	0.899168	0.590117	10.8501	10.3373	0.659466	0.952776	1.44477
GLIS3	na	30.5717	15.9332	21.0697	15.8641	0.521304	0.753035	1.44452
TBC1D4	na	6.36334	3.82293	1.06178	0.921144	0.601299	0.868585	1.44451
CRABP2	na	1.52167	1.64206	26.9095	41.9291	1.07869	1.55798	1.44433
RERE	na	69.0285	33.0209	54.748	37.801	0.47843	0.690502	1.44327
CEP55	na	2.87042	1.59075	4.81119	3.85516	0.555485	0.801636	1.44313
ZFP579	na	13.0725	12.649	6.20477	8.66557	0.967625	1.39606	1.44277
NEGR1	na	6.57084	4.05385	1.72539	1.53524	0.617432	0.890325	1.44198
GM4895	na	3.28542	2.84795	2.75399	3.44576	0.867185	1.25043	1.44194
PARP10	na	10.0984	9.98067	1.62585	2.31992	0.988356	1.42471	1.44149
NR1D1	na	27.7359	19.6278	20.937	21.3569	0.707756	1.02005	1.44124
CHST15	na	18.7442	13.8549	7.46564	7.94913	0.739274	1.06469	1.44018
4732440D04RIK	na	0.484167	0.0513145	2.18992	0.375281	0.1212	0.174527	1.43999
TIAM1	na	4.39209	2.38612	9.88782	7.74443	0.544148	0.783413	1.43971
GM6223	na	3.94251	1.77035	6.00569	3.88927	0.450211	0.648089	1.43952
GALNT16	na	2.31709	1.71904	13.2722	14.1924	0.742825	1.06929	1.43949
SDR42E1	na	2.04042	2.56572	1.12814	2.04699	1.2564	1.80847	1.43941
RIC3	na	6.74376	5.54197	4.18076	4.94688	0.822013	1.18288	1.43901
ZFP397	na	19.6088	11.5971	15.3958	13.1007	0.591597	0.851009	1.43849
BC027231	na	5.04918	3.3611	10.2196	9.79141	0.666227	0.958134	1.43815
DEDD	na	3.42376	2.59138	3.35124	3.65046	0.757477	1.08906	1.43775
4930556M19RIK	na	3.45834	2.77098	1.3604	1.56936	0.801727	1.15265	1.43771
ARHGAP20	na	40.6701	19.3712	10.6178	7.2668	0.47641	0.684647	1.4371
GM14121	na	7.40085	6.59391	5.93933	7.60796	0.891091	1.28055	1.43706
CSPP1	na	8.64585	4.49002	8.59378	6.41389	0.519792	0.746588	1.43632
PABPC1	na	252.217	290.568	427.068	706.585	1.15205	1.65449	1.43612
AASDH	na	4.73792	3.43807	2.32264	2.42227	0.726134	1.04274	1.43601
KLRG2	na	0.242084	0.333544	1.85811	3.65046	1.36516	1.96027	1.43593
R3HDM2	na	60.4518	48.5692	56.0752	64.6847	0.803464	1.15351	1.43567
BAZ2B	na	13.4184	6.82483	10.1864	7.43738	0.508926	0.730347	1.43508
LGR6	na	0.10375	0.0513145	2.0572	1.56936	0.532378	0.763823	1.43474
9330104G04RIK	na	2.55917	3.10453	1.52631	2.66108	1.2124	1.73942	1.43468
GM12168	na	2.76667	3.02756	3.01943	4.74218	1.09401	1.56897	1.43415
BEND3	na	10.375	6.43997	7.43245	6.61859	0.621025	0.890621	1.43412
UBOX5	na	6.36334	5.87551	5.6407	7.4715	0.923438	1.32409	1.43387
RAD51AP1	na	3.45834	3.5407	3.48396	5.11746	1.02376	1.46774	1.43368
ITGB3BP	na	3.90792	5.23408	1.79175	3.44576	1.33862	1.91882	1.43343
8030462N17RIK	na	3.94251	1.89864	6.17159	4.26455	0.482681	0.691416	1.43245
TOM1L1	na	7.74668	6.49128	16.8226	20.1969	0.838119	1.20049	1.43236
SLC17A9	na	0.587918	0.410516	3.05262	3.07048	0.702496	1.00584	1.4318
NAV2	na	9.61418	4.31042	16.0926	10.3373	0.44882	0.642549	1.43164
GM11613	na	4.01167	4.0795	4.37984	6.37977	1.01687	1.45575	1.4316
KIF5B	na	68.8901	24.0408	127.214	63.5589	0.349053	0.499653	1.43145
AP5B1	na	3.52751	2.56572	2.52173	2.62696	0.727994	1.04159	1.43077
USP34	na	46.3072	15.1121	52.5249	24.5297	0.326467	0.467096	1.43076
SMC1A	na	65.2589	51.4428	49.7377	56.0874	0.788315	1.12764	1.43045
CEP89	na	8.99168	8.44123	5.74024	7.71031	0.93884	1.3427	1.43017
F8	na	4.56501	2.38612	2.18992	1.63759	0.523574	0.748746	1.43007
MOK	na	1.21042	1.41115	1.06178	1.77405	1.16469	1.66558	1.43005
SMAD9	na	13.2109	9.41621	3.94849	4.02574	0.712945	1.01952	1.43001
POLR3A	na	8.78418	5.51631	9.72192	8.73381	0.628337	0.89845	1.42989
DKK2	na	1.62542	1.0776	26.6772	25.3485	0.664699	0.950209	1.42953
MPP2	na	5.11834	3.33544	10.3192	9.62083	0.652234	0.932381	1.42952
NUSAP1	na	8.3346	5.84985	8.26197	8.29029	0.702175	1.00342	1.42902
C030037D09RIK	na	1.97125	2.00127	1.52631	2.21757	1.01516	1.45042	1.42876
SORBS2	na	58.8263	40.7694	28.2367	27.9414	0.69309	0.989544	1.42773
ZFP146	na	58.9993	49.5955	35.1383	42.1679	0.840634	1.20001	1.4275
ZFP74	na	12.7613	9.33924	8.12925	8.49499	0.732018	1.04494	1.42748
EIF4EBP2	na	11.4817	6.31168	15.429	12.1113	0.550046	0.78509	1.42732
GM10053	na	2.10959	1.69338	4.31348	4.94688	0.803487	1.14656	1.42698
EIF2AK4	na	15.0438	10.3142	11.6796	11.429	0.685788	0.978562	1.42691
ZFP507	na	11.2742	3.8999	10.9164	5.3904	0.3464	0.494176	1.42661
TDG	na	3.35459	2.69401	1.72539	1.97875	0.803573	1.14613	1.4263
PROSER1	na	9.44127	5.54197	7.49882	6.27742	0.58736	0.837304	1.42554
PHLDB2	na	134.495	79.2809	245.337	206.166	0.589497	0.84034	1.42552
GM14131	na	1.14125	1.74469	1.09496	2.38815	1.5249	2.17207	1.4244
RNF24	na	17.015	6.67088	21.501	12.009	0.392358	0.558703	1.42396
HNRNPR	na	38.2838	30.6091	26.9095	30.6366	0.799575	1.13846	1.42383
SSC5D	na	89.5018	62.5524	71.106	70.7575	0.698923	0.995099	1.42376
ALDOART1	na	7.33168	7.00443	18.2825	24.8709	0.955416	1.3602	1.42367
GM13092	na	5.42959	7.13272	5.50798	10.3032	1.31319	1.86927	1.42345
3110039M20RIK	na	0.0345834	0.0256572	1.3604	1.53524	0.79225	1.12773	1.42345
TCF7L1	na	71.3801	56.7282	24.5205	27.7367	0.794758	1.13112	1.42322
ZMYND11	na	88.1531	59.1656	52.3258	49.9464	0.6712	0.954535	1.42213
ASAH2	na	24.1046	13.0852	20.6383	15.9324	0.543009	0.772072	1.42184
PRR14	na	29.2921	26.4013	37.4277	47.9677	0.901339	1.28155	1.42182
DYNC2H1	na	12.7267	5.56762	4.2803	2.66108	0.437846	0.622444	1.4216
TSPAN2	na	4.94543	3.0019	29.6303	25.5873	0.60767	0.863592	1.42115
PRIM2	na	8.68043	10.0833	9.09148	15.0112	1.16146	1.65053	1.42109
GM5472	na	1.27959	0.821032	1.1945	1.09173	0.643971	0.914559	1.42019
SP2	na	16.5654	13.7266	12.6086	14.8406	0.828717	1.17691	1.42015
YLPM1	na	32.7159	19.2429	31.1234	25.9967	0.588289	0.835323	1.41992
RNF157	na	9.09543	7.18403	13.5377	15.1818	0.790044	1.12137	1.41938
GOLGA4	na	51.9443	26.7862	61.6164	45.1019	0.51575	0.732016	1.41932
SACS	na	4.08084	1.43681	17.3535	8.69969	0.353414	0.501564	1.4192
INCENP	na	12.8304	10.2886	13.6704	15.5571	0.802016	1.13793	1.41883
GDF10	na	56.4747	60.2945	1.39359	2.11522	1.06763	1.51473	1.41878
PEAK1	na	79.2306	34.6116	111.985	69.3928	0.436907	0.619693	1.41836
HAND2	na	0.276667	0.256572	4.57892	6.03861	0.929505	1.3182	1.41818
KIF3A	na	24.3813	15.7279	17.453	15.9665	0.645202	0.914869	1.41796
GM3608	na	8.5421	3.51504	13.9027	8.11971	0.412073	0.58429	1.41793
STC1	na	5.63709	3.74596	9.58919	9.04085	0.665018	0.942867	1.41781
HPSE	na	1.31417	1.41115	1.85811	2.83166	1.07333	1.52159	1.41764
UBAP2	na	57.2701	35.2274	69.9779	61.0002	0.615166	0.871722	1.41705
6330403L08RIK	na	10.2713	9.64713	10.5846	14.0901	0.939284	1.33092	1.41696
MBD5	na	17.7413	9.41621	17.5525	13.2031	0.530973	0.75232	1.41687
PPP1R26	na	12.3463	7.36363	3.35124	2.83166	0.596699	0.845347	1.4167
REV3L	na	24.7963	12.4181	17.453	12.3843	0.500974	0.709717	1.41668
LATS1	na	57.7197	29.6598	44.5284	32.4106	0.51393	0.727915	1.41637
STRBP	na	20.1275	13.2391	21.2356	19.7875	0.657905	0.931837	1.41637
RNF38	na	18.3638	8.72346	22.9278	15.4206	0.475276	0.672693	1.41537
CTTNBP2NL	na	31.0213	19.5508	50.6336	45.1701	0.630339	0.892116	1.4153
PSD3	na	20.3005	8.49255	19.7093	11.6678	0.418583	0.59217	1.4147
ZFP72	na	1.34875	0.641431	1.06178	0.716445	0.478813	0.677306	1.41455
HELZ	na	19.9546	9.31358	20.3065	13.4078	0.466962	0.660408	1.41427
SOX6	na	16.1504	5.56762	3.0858	1.50112	0.345075	0.487853	1.41376
CCDC112	na	5.84459	3.92556	5.20935	4.94688	0.672127	0.949696	1.41297
GNPTAB	na	35.448	18.9094	31.7538	23.9156	0.533551	0.753222	1.41172
HUS1	na	8.92252	4.66962	5.54116	4.09397	0.5238	0.739224	1.41127
ATR	na	8.57668	4.0795	7.26655	4.87865	0.476162	0.671763	1.41079
TPR	na	107.312	45.8238	104.652	63.0472	0.427059	0.60248	1.41077
CMKLR1	na	2.42084	2.74533	3.21852	5.15158	1.13358	1.59905	1.41062
USP8	na	60.5901	39.2043	59.9573	54.7227	0.64709	0.912707	1.41048
AKT3	na	15.77	8.82609	26.5445	20.9475	0.559909	0.789213	1.40954
IRF5	na	5.42959	6.41431	2.18992	3.65046	1.18108	1.66439	1.40921
PCDHB20	na	4.91084	2.33481	2.18992	1.46701	0.476334	0.671149	1.40899
LRRTM3	na	1.8675	1.33418	1.69221	1.70582	0.715694	1.008	1.40843
QSER1	na	30.3296	12.1359	27.6063	15.5571	0.400298	0.563667	1.40812
ZCCHC11	na	21.2688	9.00569	11.215	6.68682	0.42365	0.596538	1.40809
OCRL	na	24.243	12.4438	34.176	24.7003	0.513462	0.722806	1.40771
CBX2	na	5.29126	3.43807	3.01943	2.76343	0.650318	0.915449	1.40769
SRRM4	na	0.345834	0.256572	1.3604	1.43289	0.748003	1.05296	1.40769
FNBP4	na	23.7934	13.5983	18.1498	14.6018	0.571669	0.804608	1.40747
ANGPT2	na	0.864585	0.615774	4.6121	4.63983	0.714983	1.006	1.40703
GM4875	na	1.55625	0.692746	4.2803	2.6952	0.44811	0.630399	1.4068
GM12183	na	47.6213	39.974	36.8636	43.5326	0.839442	1.18087	1.40673
MSX1	na	4.04626	5.51631	1.0286	1.97875	1.36256	1.91627	1.40637
EP300	na	40.7047	17.9857	37.8259	23.5062	0.441974	0.621516	1.40623
GGN	na	2.80125	2.00127	1.52631	1.53524	0.71527	1.00582	1.40621
ANAPC15-PS	na	1.00292	1.20589	1.12814	1.91052	1.2007	1.6884	1.40617
SEMA3E	na	14.0409	8.26163	4.24712	3.51399	0.588645	0.827723	1.40615
CNIH2	na	3.32001	5.28539	3.74941	8.39264	1.59049	2.23563	1.40562
ZFP36L1	na	26.975	18.5502	19.9747	19.3099	0.687777	0.966731	1.40559
UBA6	na	9.89085	3.23281	27.4404	12.6231	0.327419	0.460184	1.40549
HSPB6	na	18.0525	18.7554	75.4859	110.196	1.03892	1.45977	1.40509
GPR56	na	2.80125	1.87298	3.11898	2.93401	0.66961	0.940856	1.40508
S1PR1	na	21.7184	17.9601	12.7414	14.8065	0.82702	1.16198	1.40502
ZNHIT1	na	15.0784	19.2943	17.1544	30.8412	1.27944	1.79748	1.40489
HIVEP2	na	19.7471	9.28792	14.7654	9.7573	0.470568	0.661016	1.40472
GM14109	na	1.41792	1.23155	1.75857	2.14933	0.869333	1.22115	1.4047
CDK13	na	38.9409	23.3224	35.2378	29.6472	0.599005	0.841384	1.40463
VPRBP	na	17.1879	10.5195	17.2207	14.8065	0.612215	0.859877	1.40453
MXD1	na	4.80709	5.10579	4.11439	6.14096	1.06203	1.49155	1.40444
TCF20	na	27.39	14.5733	35.4369	26.4743	0.532209	0.747144	1.40385
GEN1	na	1.41792	0.667088	2.0572	1.36466	0.473582	0.664724	1.40361
CDA	na	3.42376	5.90117	1.95766	4.74218	1.72183	2.41631	1.40334
MAP1A	na	48.7972	26.8631	81.7238	63.1154	0.550583	0.772324	1.40274
RALGAPA1	na	19.3667	10.8274	17.4862	13.7148	0.559262	0.784426	1.40261
PLA2G6	na	9.92543	8.28729	15.064	17.6382	0.835094	1.17079	1.40198
RPS26-PS1	na	28.6696	45.0541	28.668	63.1495	1.57133	2.20243	1.40164
MINK1	na	21.6838	14.445	29.2653	27.3273	0.666296	0.933796	1.40147
SRP54B	na	8.02335	8.08203	7.73108	10.9173	1.00731	1.41168	1.40144
PLP2	na	11.1704	10.3142	20.4061	26.4061	0.923407	1.29391	1.40124
GM12734	na	1.76375	2.10389	1.95766	3.27518	1.19194	1.67014	1.4012
ZMIZ1	na	59.0684	37.7162	77.6758	69.4952	0.638568	0.894694	1.40109
ZC3H14	na	51.5984	37.6135	47.6805	48.6841	0.729011	1.02105	1.40059
MAP4K2	na	7.19335	5.92682	5.14299	5.93626	0.824136	1.15399	1.40024
HECA	na	12.0004	6.79917	11.4805	9.10909	0.566879	0.793591	1.39993
CDC40	na	19.8509	14.9838	19.2447	20.3334	0.754924	1.05654	1.39954
TPMT	na	4.32292	4.46436	4.24712	6.14096	1.03265	1.44503	1.39934
GAB2	na	3.63126	2.51441	15.6281	15.1477	0.693144	0.969279	1.39838
TMEM42	na	5.87918	10.4938	2.62127	6.55035	1.78379	2.49415	1.39823
ZFP37	na	10.7209	7.0814	8.16243	7.53973	0.660791	0.92379	1.39801
SUPT16	na	26.1105	15.497	26.7767	22.2098	0.593647	0.829497	1.39729
RGS3	na	8.88793	11.5201	6.96793	12.6231	1.29587	1.81062	1.39722
PAM16	na	1.4525	1.33418	1.59267	2.04699	0.919004	1.28376	1.3969
NGF	na	1.21042	1.30852	20.7711	31.353	1.08049	1.50925	1.39682
GM9892	na	30.7446	21.2185	45.7229	44.0784	0.690239	0.964041	1.39668
MMACHC	na	10.0984	8.28729	9.82146	11.2584	0.820807	1.14618	1.39641
ZFP39	na	6.29418	4.51568	2.62127	2.62696	0.717813	1.00217	1.39614
GOLIM4	na	141.93	82.2058	178.412	144.244	0.579224	0.808498	1.39583
SGOL2	na	2.21334	1.69338	1.65903	1.77405	0.765966	1.06898	1.3956
SLC29A3	na	16.2542	6.23471	16.7562	8.97262	0.383893	0.535713	1.39547
FGD1	na	20.5425	15.7279	14.5331	15.523	0.765721	1.06807	1.39486
MAGI1	na	11.4817	8.00506	19.0788	18.5593	0.697424	0.972782	1.39482
WDR62	na	2.93959	2.36047	3.31806	3.71869	0.803553	1.12044	1.39436
GUCY1A2	na	0.415001	0.153943	1.85811	0.989376	0.383402	0.534563	1.39426
GM13077	na	3.42376	4.28476	3.18534	5.56098	1.25087	1.74385	1.39411
TSTD3	na	5.81001	7.64586	7.99652	14.6701	1.31553	1.83368	1.39388
EIF4G3	na	91.4731	61.1925	122.271	113.983	0.668998	0.932224	1.39346
REEP6	na	2.59375	3.0019	2.62127	4.23044	1.15685	1.61193	1.39338
PAPPA	na	68.3368	27.2223	98.6459	54.7569	0.398429	0.555123	1.39328
MPC1	na	3.70042	2.69401	2.52173	2.55873	0.728643	1.01463	1.39249
NFIX	na	230.81	170.441	158.769	163.247	0.738459	1.0282	1.39236
RAD52	na	7.2971	7.20969	4.11439	5.66333	0.988035	1.3757	1.39236
ZFP287	na	4.66876	2.54007	3.91531	2.96813	0.544874	0.758599	1.39225
KRIT1	na	25.4534	18.9864	23.4919	24.3932	0.746011	1.03836	1.39188
ZFP420	na	4.21917	3.5407	2.42218	2.83166	0.839512	1.16847	1.39185
CREB3L1	na	135.982	139.781	91.2798	130.564	1.02793	1.43033	1.39146
ZBTB14	na	6.05209	3.48939	4.08121	3.27518	0.577144	0.802906	1.39117
PRKAA2	na	7.15876	2.97624	3.71623	2.14933	0.416431	0.579314	1.39114
PLCL2	na	3.25084	2.8223	1.12814	1.36466	0.868514	1.20811	1.391
ZBED3	na	22.2371	18.935	16.5903	19.6511	0.851562	1.1844	1.39085
EGFL6	na	389.616	305.116	7.26655	7.91501	0.783123	1.08914	1.39076
ZFP239	na	7.78126	6.95311	3.64987	4.53748	0.893686	1.24263	1.39046
SH3D19	na	60.1405	38.4089	29.398	26.0991	0.638703	0.887815	1.39003
ANKRD17	na	84.9368	42.4884	86.0373	59.8061	0.500285	0.695148	1.3895
PCDHGA5	na	3.90792	1.15458	4.14758	1.70582	0.296953	0.412469	1.389
RPS26	na	131.866	203.257	121.474	260.001	1.54135	2.1403	1.38859
CDK12	na	17.43	8.44123	17.7516	11.9407	0.484541	0.672811	1.38856
CSTF2	na	17.9142	11.5458	17.1544	15.3524	0.64467	0.895006	1.38832
GM26782	na	6.15584	5.69591	3.31806	4.26455	0.925386	1.28454	1.38811
PTBP2	na	12.7959	7.49192	10.6178	8.63146	0.585767	0.813071	1.38805
SLC39A7	na	12.6229	10.3655	13.5045	15.3865	0.821285	1.13927	1.38719
MORN2	na	3.49292	4.82356	1.72539	3.30929	1.38004	1.91356	1.38659
B130055M24RIK	na	1.72917	1.0776	2.52173	2.18345	0.62501	0.8663	1.38606
UBAP2L	na	106.206	69.0693	120.246	108.388	0.650363	0.901388	1.38598
TBC1D31	na	11.5854	9.03135	8.46105	9.1432	0.779703	1.08054	1.38584
HDAC9	na	1.21042	0.692746	5.3089	4.23044	0.57526	0.797178	1.38577
TBC1D25	na	5.67168	3.87424	5.04345	4.7763	0.683554	0.947118	1.38558
GM13456	na	195.534	142.346	198.022	199.683	0.727998	1.00839	1.38516
UBE3A	na	25.6263	12.0332	30.5925	19.8899	0.46974	0.650251	1.38428
CFH	na	125.607	88.7997	6.17159	6.03861	0.706985	0.978481	1.38402
HID1	na	10.3404	9.85238	5.27572	6.95975	0.95284	1.3187	1.38397
SLC16A10	na	1.27959	1.10326	1.42677	1.70582	0.863099	1.19444	1.3839
RASGRP3	na	8.09251	4.82356	11.58	9.5526	0.59647	0.825047	1.38321
EMX2	na	2.93959	2.6427	7.26655	9.04085	0.899289	1.24389	1.38319
BCS1L	na	8.40376	9.26227	7.76426	11.8384	1.10206	1.52416	1.38302
NKTR	na	51.3909	22.1165	44.6611	26.5767	0.430452	0.595151	1.38262
CACNB1	na	9.89085	10.2629	4.4462	6.37977	1.03758	1.43406	1.38212
BTAF1	na	14.6288	6.08077	18.2825	10.5079	0.416006	0.574944	1.38206
CERS1	na	4.08084	3.3611	1.22768	1.39877	0.823991	1.13842	1.38159
ATP10A	na	30.2605	17.9344	40.2481	32.9565	0.592781	0.818871	1.38141
GRIPAP1	na	19.3667	15.7022	17.1212	19.1734	0.810867	1.11981	1.381
ZFP697	na	1.4525	0.846689	4.18076	3.37753	0.585311	0.808259	1.38091
THSD1	na	0.587918	0.487488	3.11898	3.58222	0.831578	1.14813	1.38066
ANKRD55	na	1.38334	1.35983	1.0286	1.39877	0.983113	1.35697	1.38028
DHX33	na	29.1192	21.1672	20.4061	20.4699	0.726995	1.00312	1.37982
LYSMD4	na	13.3146	12.0589	6.76884	8.46087	0.905749	1.24966	1.3797
PDZRN3	na	36.0013	25.7855	31.5879	31.2165	0.716305	0.988245	1.37964
ATF7IP	na	41.3272	19.0377	36.6646	23.3015	0.460767	0.635616	1.37947
LRRC8D	na	1.245	0.641431	23.0937	16.5124	0.518447	0.715119	1.37935
ZDHHC9	na	45.6155	30.1986	58.6965	53.5969	0.662087	0.913132	1.37917
CPEB3	na	5.22209	2.33481	4.31348	2.66108	0.447988	0.617665	1.37875
JMJD1C	na	22.6867	9.33924	20.0743	11.3949	0.411879	0.567817	1.3786
PRPF4B	na	33.6496	17.1904	27.1749	19.1393	0.510985	0.704392	1.3785
STX16	na	40.2897	21.9369	36.9964	27.7708	0.544576	0.750692	1.37849
PTAR1	na	0.830001	0.513145	1.79175	1.53524	0.622063	0.857503	1.37848
E130307A14RIK	na	3.97709	3.66899	1.39359	1.77405	0.922693	1.27138	1.3779
ZFP296	na	0.830001	0.718403	1.42677	1.70582	0.866889	1.19444	1.37785
RAPH1	na	12.035	5.87551	44.827	30.1589	0.488557	0.672846	1.37721
SRRM1	na	76.6022	41.693	78.074	58.5097	0.54433	0.74944	1.37681
CPLX2	na	16.7038	9.05701	12.4759	9.31378	0.542443	0.746712	1.37657
CAMTA2	na	20.1967	13.3418	23.2596	21.1522	0.660732	0.909428	1.37639
GLT8D2	na	19.5396	16.6259	6.6693	7.81266	0.850945	1.17122	1.37638
ZFP426	na	12.45	10.9556	9.12467	11.0537	0.880051	1.21122	1.3763
PKN3	na	2.35167	1.79601	4.2803	4.50337	0.764555	1.05201	1.37598
MICAL2	na	14.3521	8.54386	123.531	101.223	0.59554	0.819427	1.37594
STK11IP	na	7.47001	6.05511	5.07663	5.66333	0.810801	1.11538	1.37565
DMTF1	na	30.3296	18.5758	27.2081	22.9262	0.612572	0.842674	1.37563
KBTBD7	na	12.8996	6.38865	5.3089	3.61634	0.495587	0.681688	1.37551
ZFP951	na	2.905	1.79601	1.92447	1.63759	0.619344	0.851574	1.37496
POLR1A	na	24.1046	19.3199	19.842	21.8686	0.801571	1.1021	1.37492
VEZF1	na	60.8322	40.1793	51.264	46.5348	0.66054	0.907763	1.37427
PARP14	na	3.04334	2.15521	1.26086	1.22819	0.708974	0.974259	1.37418
TNRC6B	na	25.2805	11.4175	21.9324	13.6125	0.451814	0.620801	1.37402
MALT1	na	3.28542	2.36047	2.52173	2.4905	0.719183	0.987658	1.37331
MYO1D	na	44.993	33.8932	53.8189	55.678	0.753346	1.03454	1.37326
RIPK1	na	17.3609	12.2385	20.4724	19.8216	0.705091	0.968225	1.37319
GM5867	na	5.70626	5.13145	4.6121	5.69744	0.899415	1.2349	1.373
FMN1	na	17.2571	6.64523	17.3535	9.17732	0.38537	0.529074	1.3729
BAK1	na	22.6867	36.3307	40.9117	89.9309	1.60119	2.19793	1.37269
SLMAP	na	64.4289	37.9984	77.709	62.9107	0.589826	0.809589	1.37259
ZFP644	na	32.8888	17.37	25.1841	18.2523	0.528262	0.724847	1.37213
IQSEC2	na	16.9113	14.7016	18.4484	22.0051	0.869402	1.1927	1.37187
TIA1	na	29.4996	14.2141	26.1131	17.2629	0.481988	0.66119	1.3718
GM7809	na	34.7909	26.2987	58.431	60.5908	0.755966	1.03696	1.3717
STEAP4	na	12.9342	9.3649	1.95766	1.94464	0.724221	0.993378	1.37165
PHF21A	na	26.0067	19.9613	27.739	29.2037	0.767621	1.05279	1.37149
NRG1	na	4.35751	4.20779	2.98625	3.95751	0.965707	1.32433	1.37136
GOLGB1	na	96.7643	36.5872	77.3772	40.1209	0.378161	0.518563	1.37128
EDN1	na	1.34875	1.05195	3.94849	4.23044	0.7813	1.07125	1.37112
MACF1	na	137.538	63.2708	154.356	97.3342	0.460056	0.630602	1.37071
DDX11	na	2.55917	1.71904	2.88671	2.66108	0.672788	0.922064	1.37051
SIRT7	na	6.46709	6.13208	8.92558	11.5996	0.948265	1.29931	1.3702
ZFP454	na	2.24792	2.41178	1.22768	1.80817	1.07262	1.46963	1.37012
ATG14	na	8.47293	7.54323	5.87297	7.16445	0.890383	1.21959	1.36974
FIP1L1	na	41.8113	38.3319	43.2011	54.2451	0.9168	1.25559	1.36954
FAM210B	na	6.64001	6.97877	13.4381	19.344	1.05095	1.43921	1.36943
PCMTD1	na	32.3355	16.1641	25.715	17.6041	0.500016	0.684688	1.36933
WDPCP	na	5.94834	6.31168	2.88671	4.19632	1.061	1.45235	1.36886
DAB2	na	144.455	92.2891	59.5924	52.0958	0.6389	0.87422	1.36832
IQSEC1	na	108.419	83.3091	58.8292	61.8531	0.768418	1.05139	1.36826
IZUMO4	na	13.4875	19.5765	9.22421	18.3205	1.45117	1.98524	1.36803
SETD2	na	65.1205	36.4846	47.3155	36.2658	0.560319	0.766508	1.36798
GPD2	na	20.335	9.74975	23.9232	15.6936	0.47967	0.656118	1.36785
COLEC12	na	175.027	116.843	110.292	100.678	0.66759	0.912832	1.36735
TNRC6A	na	34.2721	16.8312	36.6314	24.5979	0.491228	0.671574	1.36713
NUMB	na	21.8221	20.2949	22.0319	28.0096	0.930041	1.27122	1.36684
FKBP1B	na	5.74084	8.85175	3.91531	8.25618	1.5411	2.10632	1.36676
ZFP759	na	3.25084	2.18087	1.22768	1.12584	0.671709	0.917609	1.36608
PLEKHH2	na	54.2268	33.5853	24.7195	20.9134	0.619409	0.846078	1.36594
SYNE2	na	9.47585	3.77162	4.08121	2.21757	0.398556	0.544296	1.36567
FGF2	na	0.484167	0.153943	4.18076	1.8764	0.329562	0.449922	1.36521
DHTKD1	na	4.49584	2.05258	2.18992	1.36466	0.457562	0.624591	1.36504
EME1	na	1.21042	1.0776	1.26086	1.53524	0.891029	1.21617	1.36491
CDC14A	na	2.76667	1.48812	1.39359	1.02349	0.53927	0.736019	1.36484
ZFP800	na	6.81293	2.87361	7.6979	4.43514	0.422499	0.57661	1.36476
FADS2	na	43.0217	30.7374	37.1623	36.2316	0.714517	0.974963	1.36451
IRAK4	na	7.43543	5.79854	7.532	8.01736	0.7801	1.06437	1.3644
SPATA6	na	36.2088	35.7405	31.9197	42.9867	0.987071	1.34662	1.36426
GM6501	na	5.04918	3.0019	6.30431	5.11746	0.595204	0.81199	1.36422
LYST	na	6.53626	1.66772	5.97251	2.0811	0.256103	0.34936	1.36414
ZFP354A	na	2.62834	1.87298	1.85811	1.80817	0.713523	0.973242	1.364
ZBTB43	na	9.06085	5.05448	8.42787	6.41389	0.558246	0.76127	1.36368
ACIN1	na	63.0801	47.5942	51.1977	52.6758	0.754537	1.02887	1.36357
RBBP6	na	43.0563	29.2493	34.4746	31.933	0.679388	0.926292	1.36342
BRD4	na	64.2214	39.6148	67.9871	57.1791	0.616898	0.841049	1.36335
GBP3	na	2.55917	2.15521	1.69221	1.94464	0.842667	1.14843	1.36286
CRAMP1L	na	16.3234	5.46499	12.7082	5.79979	0.335137	0.456741	1.36285
PLEKHA4	na	23.24	25.4263	4.71165	7.02798	1.09404	1.49075	1.36261
GRIN3A	na	1.4525	0.667088	3.4176	2.14933	0.462371	0.629809	1.36213
NFIA	na	51.218	38.6655	26.4449	27.1908	0.75496	1.0282	1.36192
IFITM2	na	164.237	273.327	103.424	234.346	1.66419	2.26577	1.36149
CCNK	na	23.24	23.1172	23.6909	32.0694	0.994715	1.35353	1.36072
ALDH1L2	na	87.5997	62.1675	53.9185	52.0617	0.709705	0.965568	1.36052
MEIS2	na	75.4955	60.0123	37.9586	41.0421	0.794935	1.08121	1.36013
ATXN2	na	44.7509	40.6924	55.8098	69.0175	0.909326	1.23662	1.35993
ZMIZ2	na	19.9892	16.472	27.374	30.6707	0.824116	1.12039	1.35951
PALMD	na	30.8484	27.5302	11.0491	13.4078	0.892466	1.2133	1.3595
AK129341	na	1.48709	0.692746	1.82493	1.15996	0.468835	0.637283	1.35929
VCPKMT	na	5.77543	8.23598	4.08121	7.91501	1.42542	1.93745	1.35921
PIAS1	na	23.655	15.1891	21.7333	18.9687	0.642235	0.872845	1.35907
UNC5C	na	58.0309	25.4263	35.8682	21.3569	0.438233	0.595521	1.35891
SNRK	na	23.413	12.3668	16.159	11.5996	0.528372	0.717989	1.35887
SHROOM1	na	9.71793	8.90307	4.71165	5.86803	0.91622	1.24499	1.35884
KIF21A	na	6.12126	2.25784	3.94849	1.97875	0.369715	0.502198	1.35834
AK010878	na	1.4525	1.15458	1.92447	2.0811	0.796065	1.08103	1.35797
KDM3A	na	16.8075	9.7241	23.9232	18.7982	0.578766	0.785845	1.35779
PIP5K1C	na	52.4976	45.1054	57.1702	66.6976	0.859213	1.16663	1.35778
GATC	na	14.4213	17.0877	12.3432	19.8558	1.18479	1.60823	1.3574
TSTD2	na	7.74668	4.28476	10.2196	7.6762	0.553592	0.751327	1.35718
ZFHX4	na	25.1421	10.3399	26.644	14.8748	0.411453	0.558417	1.35718
PPM1H	na	3.76959	3.25847	3.98167	4.67395	0.864711	1.1735	1.3571
2310061I04RIK	na	11.7238	14.0345	14.7654	23.9838	1.19696	1.62398	1.35675
UST	na	29.8455	23.3224	10.651	11.2925	0.781501	1.06019	1.3566
GM14274	na	1.245	1.10326	1.16132	1.39877	0.886914	1.203	1.35639
TRIM44	na	93.9631	62.9885	85.2078	77.4443	0.670384	0.908896	1.35579
HS6ST1	na	28.635	28.223	63.6072	84.984	0.985614	1.33603	1.35553
EBF2	na	0.899168	0.333544	3.74941	1.91052	0.376758	0.510646	1.35537
PTPN4	na	4.91084	2.4631	4.41302	3.00225	0.502412	0.680922	1.3553
PCYT1B	na	4.73792	3.59201	2.02402	2.0811	0.758568	1.02809	1.3553
NCOR2	na	68.5789	36.3563	100.04	71.8833	0.530196	0.718573	1.3553
CCDC68	na	3.25084	2.97624	10.2528	12.7254	0.915747	1.24097	1.35514
INPP4A	na	7.81585	4.72093	7.00111	5.73156	0.604445	0.818882	1.35477
CDK11B	na	45.3734	42.2062	54.4162	68.574	0.930209	1.26014	1.35468
PCDHGB7	na	1.14125	0.384859	1.92447	0.887027	0.342058	0.463257	1.35432
RAB15	na	4.49584	4.33607	3.18534	4.1622	0.96453	1.30587	1.35389
NKRF	na	6.46709	4.51568	6.20477	5.86803	0.698645	0.945801	1.35377
ARID2	na	33.8917	15.6766	23.7573	14.8748	0.462682	0.626245	1.35351
KMT2C	na	16.5309	6.41431	12.2105	6.41389	0.388331	0.525604	1.3535
CSNK1G1	na	21.8567	12.4438	32.7161	25.212	0.569499	0.77069	1.35328
KLHL20	na	19.8509	14.2141	19.6097	19.0028	0.716165	0.969065	1.35313
FSTL3	na	2.10959	1.46246	14.6326	13.7489	0.69446	0.939641	1.35305
GKAP1	na	10.3059	10.9556	7.73108	11.122	1.063	1.43813	1.3529
BC051226	na	2.31709	3.51504	1.32722	2.72931	1.51515	2.04978	1.35286
SPTY2D1	na	32.2663	19.8331	23.4255	19.4805	0.614768	0.831653	1.35279
CTAGE5	na	50.1113	40.6411	52.4585	57.5544	0.811047	1.09713	1.35273
ZEB2	na	27.8742	12.8286	35.5032	22.1074	0.460395	0.622777	1.3527
SMAP2	na	32.0242	30.8144	25.4495	33.1271	0.96223	1.30158	1.35267
TPP1	na	80.4756	56.2407	153.162	144.79	0.698886	0.945345	1.35265
TESK2	na	5.08376	4.95185	2.82035	3.71869	0.974095	1.31758	1.35262
CEP295	na	7.05501	3.84859	8.82604	6.51624	0.54605	0.738545	1.35252
STAU1	na	76.0835	72.0456	71.471	91.5344	0.946934	1.28069	1.35246
NTF3	na	0.276667	0.256572	5.50798	6.92563	0.929505	1.25699	1.35232
MEF2A	na	79.4035	43.2068	101.4	74.6126	0.544191	0.735847	1.35219
ZDHHC21	na	22.7559	11.674	16.8226	11.6678	0.513192	0.693734	1.3518
2510009E07RIK	na	42.4684	26.9401	17.1876	14.7383	0.634429	0.857568	1.35172
RPS6KB2	na	10.8938	11.1609	12.3432	17.0923	1.0245	1.3845	1.35138
CHST10	na	6.53626	6.79917	2.52173	3.54811	1.04017	1.40567	1.35138
SLK	na	40.6701	19.987	43.4666	28.8625	0.491547	0.664081	1.351
MOXD1	na	1.97125	1.41115	4.57892	4.43514	0.717067	0.968655	1.35086
HEPH	na	4.32292	3.25847	7.10065	7.23268	0.754242	1.01857	1.35046
BAHCC1	na	15.1129	6.0038	18.2493	9.79141	0.397596	0.536748	1.34998
TIAL1	na	35.6209	32.9439	29.0994	36.334	0.924866	1.24855	1.34998
LRP11	na	13.9025	11.1096	16.8557	18.1841	0.799227	1.07877	1.34976
SPAG1	na	0.760835	0.667088	1.29404	1.53524	0.878128	1.18519	1.34968
AREL1	na	16.7038	8.13335	22.2642	14.6359	0.487174	0.657505	1.34963
GPATCH8	na	24.0009	11.4175	24.9186	16.0006	0.475894	0.642234	1.34953
NAALAD2	na	6.19043	4.77225	2.68763	2.79755	0.771218	1.04077	1.34952
WNK1	na	150.438	75.4836	196.097	132.781	0.501788	0.677132	1.34944
BC026585	na	4.08084	5.43934	3.98167	7.16445	1.33221	1.79768	1.34939
NTN4	na	5.60251	4.51568	25.8145	28.0778	0.806299	1.08765	1.34894
ZBTB26	na	4.53042	2.02692	3.61669	2.18345	0.448423	0.604632	1.34835
RBM25	na	54.3651	35.3557	62.6118	54.8933	0.650392	0.876742	1.34802
ACACB	na	2.97417	2.12955	1.09496	1.05761	0.716813	0.966148	1.34784
ELK1	na	19.6434	12.2642	23.5914	19.8558	0.624502	0.841708	1.34781
CAPZA1	na	13.4529	9.85238	15.8271	15.6253	0.732526	0.987255	1.34774
MYRF	na	2.59375	1.56509	4.14758	3.37753	0.604686	0.814712	1.34733
BPTF	na	46.7567	22.4757	46.121	29.8519	0.480788	0.647315	1.34636
MYO6	na	16.4963	9.82673	11.9118	9.5526	0.595899	0.802081	1.346
SPTBN1	na	411.369	224.681	420.133	308.788	0.546186	0.734982	1.34566
9030407P20RIK	na	1.31417	1.53943	1.42677	2.25168	1.17033	1.5748	1.3456
PKIA	na	5.01459	2.97624	25.7813	20.6063	0.594194	0.799338	1.34525
FLT1	na	2.38625	1.30852	19.5102	14.4312	0.549938	0.739789	1.34522
TOPBP1	na	23.9663	13.9575	28.9998	22.7215	0.582528	0.783568	1.34512
MBOAT1	na	6.05209	5.18276	3.84895	4.43514	0.856558	1.15197	1.34488
RP24-114E18.7	na	3.11251	1.00063	2.52173	1.09173	0.32331	0.434807	1.34486
TBC1D23	na	26.1105	20.5515	21.3351	22.5851	0.787165	1.05856	1.34478
SETBP1	na	33.8226	14.7016	31.7538	18.5593	0.434809	0.584585	1.34447
GPR64	na	77.9164	37.6135	38.6886	25.1097	0.482798	0.649097	1.34445
FAN1	na	5.91376	3.02756	3.81577	2.62696	0.512642	0.689133	1.34428
DGKE	na	5.67168	3.82293	6.43704	5.83391	0.67452	0.906425	1.34381
ADRA1B	na	6.64001	5.41368	5.04345	5.52686	0.815545	1.09569	1.34351
SPOCK3	na	0.484167	0.359201	1.32722	1.33054	0.746288	1.00248	1.34329
NUF2	na	9.23377	6.82483	9.68874	9.62083	0.739353	0.992998	1.34306
HEATR5B	na	21.5455	12.1102	22.7287	17.1606	0.562248	0.755107	1.34301
NUP62CL	na	0.0345834	0.0256572	1.89129	2.01287	0.79225	1.064	1.34301
PFKFB1	na	1.0375	1.41115	1.1945	2.18345	1.35725	1.82215	1.34253
ZFP26	na	8.43835	2.33481	6.70248	2.4905	0.277408	0.372364	1.3423
B230217C12RIK	na	4.04626	3.51504	2.95307	3.44576	0.868986	1.16637	1.34221
WDR78	na	3.66584	2.66835	2.02402	1.97875	0.728518	0.977729	1.34208
ULK3	na	6.43251	4.18213	4.6121	4.02574	0.650611	0.873094	1.34196
CEP350	na	16.7038	7.36363	16.4908	9.7573	0.441117	0.59189	1.3418
ANP32-PS	na	3.70042	4.87488	3.31806	5.86803	1.31667	1.76657	1.3417
RPP21	na	5.77543	7.10706	6.56976	10.849	1.23023	1.65053	1.34164
TJP1	na	50.6647	30.7117	77.6426	63.1495	0.606242	0.813356	1.34164
APOBEC1	na	5.25668	5.97814	2.25628	3.44576	1.13703	1.52523	1.34142
MYO5A	na	32.7159	16.6259	74.7227	50.9358	0.508316	0.6817	1.34109
RAB5A	na	55.5755	42.8476	59.9905	62.0237	0.771014	1.03389	1.34094
RSBN1L	na	8.99168	5.25974	7.00111	5.49274	0.585342	0.784811	1.34077
COG5	na	12.0004	4.95185	8.26197	4.5716	0.413049	0.553783	1.34072
ZC3H7B	na	88.1185	66.9398	56.2411	57.2815	0.759679	1.0185	1.34069
ASAP2	na	5.87918	3.48939	6.47022	5.15158	0.594095	0.796463	1.34063
FAXC	na	8.30001	3.41241	10.0205	5.52686	0.411728	0.551928	1.34052
ZSCAN29	na	12.5192	9.67278	8.95876	9.27967	0.772789	1.03579	1.34032
NDC80	na	4.73792	3.41241	5.4748	5.28805	0.720728	0.965941	1.34023
ARHGAP18	na	6.22501	4.74659	5.83979	5.97037	0.762823	1.02233	1.34019
ARID1B	na	33.2001	20.5515	28.8671	23.9497	0.619115	0.829704	1.34015
SPRED2	na	16.4271	9.23661	28.3362	21.3569	0.562502	0.753768	1.34003
WHSC1L1	na	40.0822	26.6835	38.3568	34.2188	0.665791	0.892142	1.33997
CYP26B1	na	14.8363	9.49318	9.58919	8.22206	0.640066	0.857554	1.33979
TRAPPC8	na	28.0471	16.241	27.3076	21.1863	0.579188	0.775907	1.33965
GM6158	na	4.28834	4.56699	3.4176	4.87865	1.06485	1.42646	1.33959
PPP3CC	na	10.3059	10.3399	7.56518	10.1667	1.0033	1.3435	1.33908
MEF2D	na	33.6842	22.5271	64.5694	57.8273	0.668854	0.895597	1.339
D7ERTD715E	na	14.4213	3.92556	14.5995	5.32216	0.272629	0.36491	1.33849
CBLB	na	22.2025	13.0082	21.5342	16.8876	0.586045	0.784307	1.3383
GM13771	na	1.76375	1.87298	1.99084	2.83166	1.06164	1.42058	1.3381
RPL41	na	67.5414	83.4887	65.6644	108.593	1.23608	1.65367	1.33783
SYNM	na	24.9	20.1923	3.61669	3.92339	0.810996	1.08461	1.33738
GM7289	na	1.245	1.35983	1.49313	2.18345	1.09162	1.45975	1.33724
ASCC3	na	25.0038	13.7779	28.7012	21.1522	0.551185	0.737055	1.33722
ATF3	na	2.31709	3.02756	2.65445	4.63983	1.30552	1.74559	1.33709
CEP164	na	13.7642	8.41558	19.4438	15.8983	0.611648	0.817729	1.33693
IL15RA	na	5.63709	5.59328	3.88213	5.15158	0.992239	1.32629	1.33667
GM14538	na	3.35459	2.20652	3.68305	3.24106	0.658616	0.880267	1.33654
PLCXD2	na	2.38625	1.30852	12.4427	9.1432	0.549938	0.735002	1.33652
MED15	na	45.7538	36.6129	53.7194	57.4521	0.800251	1.06947	1.33642
MSH3	na	5.36043	5.31105	3.68305	4.87865	0.990803	1.32389	1.33617
OFD1	na	15.3204	13.3931	14.1349	16.5124	0.874266	1.16809	1.33609
TPM3-RS7	na	23.8971	16.3693	33.8442	30.9777	0.685102	0.915324	1.33604
DSN1	na	7.02043	5.56762	5.37526	5.69744	0.793307	1.05985	1.33598
WDR60	na	10.8592	9.31358	7.83062	8.97262	0.857778	1.14568	1.33564
TSHZ1	na	18.6404	11.751	38.3236	32.2741	0.63057	0.842183	1.33559
CCDC88A	na	28.7388	9.69844	25.8145	11.6337	0.337662	0.450844	1.33519
GPR126	na	132.973	71.2245	31.8202	22.7557	0.53566	0.715208	1.33519
RLF	na	22.3409	12.3411	24.1887	17.8429	0.55257	0.737746	1.33512
ZC3H13	na	29.7071	24.1691	32.9483	35.7881	0.813633	1.08617	1.33496
TMA16	na	4.04626	4.33607	4.74483	6.78917	1.07148	1.4301	1.3347
ZFP618	na	13.0379	7.82546	12.1773	9.7573	0.600464	0.801407	1.33465
ATG9A	na	18.2254	10.0576	18.7139	13.783	0.552052	0.736633	1.33435
MPHOSPH8	na	16.2888	10.2886	19.7093	16.6147	0.631824	0.843056	1.33432
RSRC1	na	19.3321	14.4194	33.2138	33.0588	0.745987	0.995336	1.33425
ATRX	na	63.7718	21.2442	51.9608	23.0968	0.333216	0.444594	1.33425
USP12	na	17.4992	11.2635	16.1258	13.8513	0.643831	0.859026	1.33424
CRCT1	na	0.172917	0.153943	1.42677	1.70582	0.895347	1.19444	1.33406
LETMD1	na	13.3492	13.2905	13.0732	17.3653	0.995603	1.3281	1.33397
NFATC1	na	15.4588	12.6234	13.9359	15.1818	0.816682	1.08935	1.33388
3222401L13RIK	na	2.38625	1.66772	2.15674	2.01287	0.699941	0.933551	1.33376
EPHA3	na	11.6546	5.77288	9.19103	6.07272	0.495693	0.661032	1.33355
UBR5	na	106.932	64.1944	100.272	80.276	0.600362	0.8006	1.33353
SHROOM4	na	5.87918	3.02756	12.2105	8.39264	0.515653	0.687547	1.33335
RABL2	na	6.43251	8.46689	3.74941	6.58447	1.31585	1.75445	1.33332
ITIH5	na	9.89085	5.18276	4.34666	3.03636	0.524399	0.699131	1.3332
ANKRD13C	na	14.9746	12.2385	18.8466	20.5381	0.817386	1.08971	1.33317
TNFRSF22	na	3.63126	2.92493	5.90615	6.34566	0.805934	1.07431	1.333
ZFP945	na	10.8592	8.69781	8.59378	9.17732	0.801117	1.06784	1.33294
RAB6B	na	7.5046	7.28666	7.29973	9.45025	0.970992	1.29426	1.33293
RAD23B	na	116.304	90.5444	167.131	173.414	0.778531	1.03759	1.33276
SNX9	na	46.8259	37.5109	65.7971	70.2457	0.801107	1.0676	1.33266
UBP1	na	35.9667	21.2442	28.7012	22.5851	0.590758	0.786965	1.33213
ANKS6	na	7.02043	7.38929	3.55032	4.981	1.05248	1.40202	1.33211
RIN3	na	10.9975	9.59581	8.8924	10.3373	0.87264	1.16233	1.33197
CPNE2	na	25.073	22.6297	30.6257	36.8116	0.902586	1.20193	1.33165
LRRC1	na	4.77251	4.10516	5.50798	6.31154	0.860413	1.14567	1.33153
PIN1RT1	na	1.14125	1.15458	1.06178	1.43289	1.01159	1.34678	1.33135
MFAP4	na	17.9142	20.6284	27.5731	42.2703	1.15144	1.53286	1.33126
TJP2	na	5.49876	4.20779	14.7654	15.0453	0.765582	1.01895	1.33095
CCDC186	na	27.563	11.6997	24.8855	14.056	0.424647	0.564973	1.33045
MKI67	na	25.5571	14.6759	32.6829	24.9732	0.57438	0.764167	1.33042
ZNRF3	na	5.01459	2.69401	6.10523	4.3669	0.538007	0.715663	1.33021
MDM1	na	3.18167	3.23281	1.89129	2.55873	1.01603	1.35134	1.33002
KDM2B	na	13.4875	7.7998	9.09148	6.99387	0.57856	0.769489	1.33001
VWA8	na	23.2746	16.4976	27.1417	25.5873	0.708929	0.942748	1.32982
XRN1	na	22.6867	9.28792	21.3019	11.5996	0.409618	0.544711	1.3298
JAZF1	na	9.85627	6.59391	2.95307	2.62696	0.669288	0.889882	1.32959
HMBOX1	na	13.7296	9.49318	10.9496	10.0643	0.691627	0.919214	1.32906
PRRC2A	na	245.507	174.187	210.199	198.148	0.709508	0.942671	1.32863
ESRRG	na	0.10375	0.0513145	1.16132	0.818794	0.532378	0.707168	1.32832
RUFY3	na	3.63126	2.4631	2.42218	2.18345	0.679045	0.901779	1.32801
ESM1	na	13.6604	11.3405	5.04345	5.56098	0.830275	1.10244	1.3278
PCDHGB4	na	3.07792	1.12892	5.3089	2.59285	0.368499	0.489203	1.32756
2810455O05RIK	na	0.518751	0.28223	1.0286	0.750561	0.551307	0.731878	1.32753
ARHGAP33	na	3.18167	2.20652	2.55491	2.35403	0.694316	0.921635	1.3274
EDA	na	16.0121	13.7266	7.76426	8.83615	0.85734	1.13791	1.32725
GM15495	na	1.00292	1.30852	1.16132	2.01287	1.30219	1.728	1.327
AP1AR	na	29.4305	20.6028	25.7813	23.9497	0.700134	0.92898	1.32686
E330009J07RIK	na	1.90209	1.33418	1.06178	0.989376	0.702738	0.932344	1.32673
HSPA12A	na	1.76375	1.02629	8.32833	6.448	0.583856	0.774452	1.32644
RAPGEF6	na	24.9692	11.5458	15.6944	9.62083	0.46258	0.613216	1.32564
MSL2	na	20.75	13.0595	14.4336	12.0431	0.629524	0.834478	1.32557
SENP7	na	21.0267	11.3148	11.0491	7.88089	0.538302	0.713476	1.32542
TNFRSF23	na	11.1013	7.41494	36.3328	32.1718	0.668187	0.885503	1.32523
ARSJ	na	6.91668	3.61767	15.1967	10.542	0.523613	0.69387	1.32516
HMGA2	na	20.0584	13.5214	138.164	123.399	0.674237	0.893141	1.32467
INTS6	na	14.0409	8.54386	13.2059	10.6443	0.608734	0.806152	1.32431
PPARD	na	24.7271	27.248	35.636	51.9934	1.10191	1.45891	1.32398
POLR2B	na	45.0967	33.1748	44.9597	43.7714	0.735686	0.973574	1.32336
EPB4.1L4A	na	3.07792	2.48875	1.59267	1.70582	0.809102	1.07067	1.32329
DHRS9	na	9.71793	4.87488	10.5846	7.02798	0.502067	0.664247	1.32303
RABGAP1L	na	19.92	13.547	20.1406	18.1158	0.680205	0.899509	1.32241
GM8261	na	1.69459	1.05195	1.82493	1.50112	0.622636	0.823375	1.3224
MEST	na	978.468	715.889	85.3073	82.5276	0.731645	0.967419	1.32225
ZFP575	na	2.42084	3.3611	2.78717	5.11746	1.38706	1.83357	1.32191
BAG2	na	13.9025	18.268	50.6336	87.918	1.31381	1.73624	1.32152
GM12470	na	2.66292	2.36047	1.89129	2.21757	0.886777	1.17175	1.32136
CDK14	na	55.2643	39.8457	37.9586	36.1634	0.721045	0.952717	1.3213
GM9105	na	3.28542	3.48939	3.45078	4.84453	1.06192	1.40292	1.32111
PAXBP1	na	9.71793	5.15711	7.20019	5.04923	0.531084	0.701611	1.32109
AKAP8	na	27.3555	21.3725	25.35	26.1673	0.781355	1.03223	1.32108
TAX1BP3	na	5.77543	7.20969	4.4462	7.33503	1.24798	1.64851	1.32094
GOLGA3	na	63.9447	34.4577	62.2136	44.2831	0.538927	0.71183	1.32083
FAM193A	na	35.2059	26.6066	29.5639	29.5107	0.7558	0.998201	1.32072
RGMA	na	40.3588	36.2793	14.5995	17.3311	0.898941	1.187	1.32044
RBMX2	na	3.38917	3.5407	3.78259	5.21981	1.0446	1.37912	1.32024
DNAJC19-PS	na	3.97709	4.64396	3.31806	5.11746	1.16733	1.54094	1.32006
RAET1E	na	3.18167	3.56636	4.91073	7.2668	1.12059	1.47896	1.31981
MTO1	na	6.43251	7.64586	7.00111	10.9855	1.18838	1.56843	1.3198
SBSN	na	1.90209	1.77035	3.05262	3.75281	0.931045	1.22875	1.31975
GM15698	na	1.55625	2.20652	2.389	4.46925	1.41561	1.86772	1.31938
METTL14	na	10.3404	11.0326	10.7837	15.1818	1.06689	1.40753	1.31929
TBX4	na	1.41792	1.10326	13.4713	13.8513	0.779389	1.02819	1.31922
PDP2	na	2.075	1.15458	1.16132	0.852911	0.558206	0.736335	1.31911
SNAPC5	na	10.9629	16.0871	7.93016	15.3524	1.46705	1.93496	1.31895
ZFP664	na	33.788	24.2718	43.5661	41.2809	0.718425	0.947555	1.31893
PCED1A	na	22.7213	26.1447	12.4759	18.9346	1.15062	1.51735	1.31873
PAX9	na	24.2084	18.0627	2.28946	2.25168	0.746222	0.98356	1.31805
LRIG2	na	12.4846	7.54323	9.42329	7.50561	0.604468	0.796677	1.31798
COCH	na	0.0691668	0.0513145	4.97709	5.04923	0.769794	1.01447	1.31785
SRPK2	na	52.0134	31.2249	50.3682	39.848	0.600388	0.791169	1.31776
SLC25A53	na	5.39501	3.77162	2.55491	2.35403	0.69956	0.921635	1.31745
GNL2	na	30.7792	30.4808	31.2229	40.735	0.990308	1.30457	1.31734
STAU2	na	9.7871	7.6202	14.9976	15.3865	0.778786	1.02591	1.31733
GM6665	na	8.16168	13.547	5.4748	11.9749	1.65916	2.18546	1.31721
OGT	na	51.633	18.4476	45.8888	21.5957	0.357387	0.470706	1.31708
ALPK1	na	8.09251	3.3611	5.17617	2.83166	0.415939	0.54779	1.31699
PRELP	na	426.897	346.809	143.307	153.319	0.812398	1.06986	1.31692
PRPF40B	na	14.94	12.4951	12.6086	13.8854	0.836441	1.10119	1.31652
CENPF	na	7.57376	3.0019	8.42787	4.40102	0.397022	0.522673	1.31648
FOXK1	na	46.1688	24.6566	31.3557	22.0392	0.534138	0.702957	1.31606
DIXDC1	na	17.6029	10.776	11.3478	9.1432	0.612357	0.805871	1.31601
MRVI1	na	3.38917	2.10389	11.6796	9.5526	0.621705	0.81802	1.31577
PIM1	na	1.72917	1.69338	4.31348	5.56098	0.979401	1.28865	1.31575
ZFP646	na	20.8538	11.9819	18.0502	13.6466	0.57474	0.756146	1.31563
ZFP54	na	2.93959	2.07824	2.45536	2.2858	0.707816	0.931176	1.31556
CASC4	na	125.814	81.7953	82.7192	70.7234	0.65015	0.854995	1.31507
VPS13D	na	28.808	17.4213	29.7298	23.6427	0.604853	0.795309	1.31488
MED18	na	1.83292	2.10389	1.62585	2.45638	1.14716	1.50821	1.31473
TRP53I11	na	4.70334	5.8242	9.55601	15.5571	1.23789	1.62744	1.31469
RASA1	na	39.0101	23.3994	48.2778	38.0739	0.599916	0.78868	1.31465
CDK18	na	7.43543	7.64586	21.4015	28.9307	1.02827	1.35167	1.31451
RFX7	na	14.6634	7.59455	17.8843	12.1796	0.518202	0.681168	1.31448
HOXC6	na	2.35167	2.59138	27.009	39.0974	1.10157	1.44743	1.31397
FBXO38	na	37.0388	25.5033	31.787	28.7601	0.688627	0.904802	1.31392
SCAF4	na	19.3667	14.599	19.9084	19.7193	0.753925	0.990507	1.3138
HSDL2	na	19.9892	16.1897	22.8283	24.2909	0.810003	1.06405	1.31363
MCOLN1	na	21.8567	21.5521	20.3065	26.3038	0.986068	1.29521	1.31351
GM53	na	0.795418	0.513145	6.96793	5.93626	0.648827	0.852118	1.31332
GM14857	na	2.62834	1.23155	4.81119	2.96813	0.470255	0.617589	1.31331
ZFP704	na	20.6463	11.828	9.02512	6.78917	0.57306	0.752482	1.31309
PPM1K	na	5.91376	3.5407	2.82035	2.21757	0.59929	0.786907	1.31306
STX3	na	6.60543	6.87614	6.03887	8.25618	1.04093	1.36666	1.31292
ZFP521	na	89.4327	74.2264	30.5262	33.2635	0.829986	1.08965	1.31285
TRIP11	na	35.448	14.6759	31.2561	16.99	0.414152	0.543695	1.31279
SNX29	na	2.075	0.769717	1.95766	0.95526	0.373479	0.490144	1.31238
PHF6	na	14.4213	7.90243	16.7894	12.0772	0.548233	0.719476	1.31236
TUG1	na	63.0801	35.5096	53.9848	39.8821	0.562987	0.738805	1.3123
SPOCK2	na	1.38334	1.18023	1.09496	1.22819	0.854064	1.12075	1.31226
SYNGAP1	na	19.1246	11.2379	24.5536	18.9346	0.587794	0.771231	1.31208
CRKL	na	16.7384	7.31232	21.0033	12.0431	0.437142	0.57356	1.31207
DPH6	na	16.6346	10.4938	17.0216	14.0901	0.631028	0.827859	1.31192
NFRKB	na	15.1129	11.8793	10.7173	11.0537	0.786154	1.03136	1.31191
ERI2	na	2.2825	1.51378	3.91531	3.41164	0.664442	0.871634	1.31183
RSPH1	na	0.830001	0.898004	1.12814	1.60347	1.08111	1.41823	1.31183
GALNT1	na	94.4127	60.0636	70.4756	58.8167	0.636214	0.834588	1.3118
EYA4	na	75.288	29.2749	16.2585	8.29029	0.388907	0.510158	1.31177
USP16	na	34.4105	24.7592	41.6748	39.3362	0.719595	0.943896	1.31171
SLC17A5	na	12.8304	10.3655	8.62696	9.1432	0.808011	1.05978	1.31159
KDM2A	na	52.048	29.044	51.2308	37.494	0.558095	0.731907	1.31144
HERC6	na	2.59375	2.10389	3.74941	3.99162	0.811747	1.06446	1.31132
MAP3K12	na	9.40668	5.67025	11.3478	8.97262	0.603143	0.790849	1.31121
TAPBPL	na	6.22501	6.82483	4.91073	7.0621	1.09623	1.43735	1.31118
LNX2	na	7.2971	6.64523	7.39927	8.83615	0.91077	1.19397	1.31095
GM12791	na	2.83584	2.71967	3.11898	3.92339	0.959156	1.25722	1.31075
ZFP318	na	16.1159	7.6202	11.6132	7.19857	0.473113	0.620134	1.31075
MARS2	na	2.97417	1.61641	6.93475	4.94688	0.544764	0.713693	1.3101
SNX13	na	37.9034	21.9369	39.0536	29.6131	0.578853	0.75832	1.31004
2010315B03RIK	na	7.2971	6.0038	4.77801	5.15158	0.822969	1.07805	1.30995
SP3	na	71.0689	39.4608	49.6382	36.0952	0.5553	0.727212	1.30958
4931428F04RIK	na	3.04334	2.97624	2.42218	3.10459	0.978013	1.28076	1.30956
AGBL5	na	6.22501	5.41368	3.38442	3.85516	0.869841	1.13875	1.30914
SYNE3	na	19.3667	6.23471	5.67388	2.38815	0.322223	0.421757	1.3089
RHBDD2	na	12.6921	11.7767	14.1018	17.1264	0.927922	1.21436	1.30869
DLG4	na	30.2605	30.3012	45.3247	59.3967	1.00135	1.31041	1.30865
GPATCH11	na	10.8938	11.9563	10.7837	15.4889	1.09746	1.43598	1.30846
PRKAR2A	na	22.9288	15.1121	39.5181	34.0823	0.659214	0.862477	1.30834
RP23-396I19.1	na	1.245	0.564459	1.26086	0.750561	0.457036	0.597949	1.30832
DZIP3	na	16.7038	8.51821	14.2677	9.51848	0.510203	0.667332	1.30798
SRSF11	na	78.7464	46.3626	71.5042	55.0639	0.588803	0.770106	1.30792
NME7	na	9.33752	9.39055	7.59836	9.99611	1.00567	1.31521	1.30779
RBM15	na	5.29126	3.43807	4.01485	3.41164	0.650318	0.850068	1.30716
NFIC	na	159.187	124.771	127.579	130.7	0.783812	1.02446	1.30702
FAM115C	na	7.74668	5.20842	10.9828	9.65495	0.672697	0.879191	1.30697
LFNG	na	7.15876	6.46563	3.35124	3.95751	0.90329	1.18046	1.30684
MPC1-PS	na	6.60543	7.0814	4.84437	6.78917	1.07197	1.40076	1.30672
SH3BP1	na	22.998	21.7573	25.0845	31.0118	0.946075	1.23621	1.30668
ACER2	na	0.345834	0.333544	1.16132	1.46701	0.965305	1.26134	1.30667
AKAP13	na	19.8163	8.31295	29.0662	15.9324	0.419746	0.548271	1.3062
GDAP2	na	11.5509	9.69844	14.8981	16.3418	0.839746	1.09685	1.30617
ATP6V0A2	na	36.0705	22.1679	39.9494	32.0694	0.61466	0.802792	1.30607
MIDN	na	54.3305	45.5416	73.5946	80.5489	0.838258	1.09448	1.30567
MIRG	na	9.40668	4.54133	7.03429	4.43514	0.483238	0.630942	1.30566
GIT2	na	28.8771	24.6566	27.9381	31.1483	0.853888	1.11487	1.30564
PTPN23	na	44.2667	27.7355	62.5123	51.1405	0.626624	0.818112	1.30559
STK39	na	20.3005	17.7035	22.5628	25.6897	0.872127	1.13853	1.30547
RBL1	na	6.25959	3.79727	7.23337	5.73156	0.607159	0.792618	1.30545
AHDC1	na	31.9551	22.6297	26.3122	24.325	0.708249	0.9245	1.30533
C630043F03RIK	na	0.830001	0.487488	2.25628	1.73994	0.59146	0.772	1.30525
FAM111A	na	12.4154	10.4168	18.8134	20.6063	0.839132	1.09526	1.30523
ZFP653	na	4.01167	2.95058	3.01943	2.8999	0.736051	0.96052	1.30496
PPFIA1	na	35.2059	20.3975	44.4952	33.6388	0.579478	0.756056	1.30472
PATL1	na	20.1621	10.4425	21.2024	14.3289	0.518127	0.675943	1.30459
HHIPL1	na	2.2825	0.898004	2.12356	1.09173	0.395649	0.516012	1.30422
VTI1A	na	16.1504	13.9062	16.5571	18.5935	0.861115	1.12293	1.30404
FOXP4	na	31.2634	30.3012	48.0455	60.7272	0.969232	1.26391	1.30403
CHSY3	na	2.87042	1.18023	5.77342	3.10459	0.412885	0.538409	1.30402
SHOX2	na	1.59084	1.35983	33.5456	37.4257	0.855553	1.11564	1.304
GM12577	na	2.45542	2.10389	1.89129	2.11522	0.857324	1.11787	1.30391
MAX	na	44.6126	39.9997	44.5947	52.1299	0.89662	1.16894	1.30372
CCDC125	na	1.21042	1.18023	2.52173	3.20694	0.975234	1.27083	1.3031
ABCC4	na	9.9946	5.59328	8.79286	6.41389	0.559999	0.729701	1.30304
FAM132B	na	2.21334	2.20652	4.77801	6.20919	0.996933	1.29901	1.30301
SHPRH	na	17.845	8.44123	13.3386	8.22206	0.473277	0.616652	1.30294
QTRTD1	na	7.5046	4.15647	5.34208	3.85516	0.554355	0.722095	1.30259
EYA1	na	25.5917	16.1897	5.34208	4.40102	0.632736	0.824116	1.30246
KLHL30	na	0.0691668	0.0769717	1.75857	2.52462	1.10065	1.43354	1.30245
NBEA	na	31.4017	15.3174	30.6589	19.4805	0.487925	0.635494	1.30244
TCHP	na	6.88209	7.49192	5.77342	8.18794	1.0885	1.41761	1.30235
GLB1L	na	20.7155	15.8818	11.4805	11.4631	0.766761	0.998488	1.30222
PTGS2	na	3.80417	1.87298	265.412	170.548	0.493465	0.642591	1.3022
BMI1	na	43.4367	26.2987	25.8809	20.4016	0.605524	0.788358	1.30194
C1QTNF2	na	1.31417	1.10326	3.0858	3.37753	0.84053	1.09428	1.3019
GCNT4	na	13.3492	8.10769	27.739	21.9369	0.607601	0.790895	1.30167
MAP2K3OS	na	2.31709	3.59201	2.68763	5.42451	1.54825	2.01516	1.30158
TADA2B	na	17.1879	12.1102	14.1349	12.9642	0.70472	0.917226	1.30155
TUBB3	na	4.59959	3.87424	21.9324	24.0521	0.842589	1.09661	1.30148
EIF3J1	na	5.49876	5.92682	5.6407	7.91501	1.07773	1.4026	1.30144
LHPP	na	6.91668	10.6734	4.34666	8.73381	1.54248	2.00737	1.30139
KIF18A	na	2.45542	1.53943	3.71623	3.03636	0.628223	0.817467	1.30124
POLR3GL	na	9.30293	13.1622	6.6693	12.2819	1.41447	1.8405	1.3012
VEGFA	na	57.6851	38.6398	94.1002	81.9477	0.669888	0.870867	1.30002
CCDC106	na	5.74084	7.95375	1.89129	3.41164	1.3849	1.80032	1.29996
DNAJC13	na	54.538	30.1216	50.1359	35.9928	0.552374	0.717953	1.29976
SLC41A1	na	30.2951	20.7311	32.4506	28.8625	0.684392	0.889457	1.29963
IGF2BP3	na	7.74668	4.0795	16.4908	11.2925	0.527125	0.68494	1.29939
SLC16A2	na	52.4284	31.1992	26.7436	20.6746	0.595147	0.773138	1.29907
A530017D24RIK	na	1.66	0.718403	1.39359	0.784678	0.435622	0.565677	1.29855
CPA4	na	1.10667	0.74406	2.68763	2.35403	0.674806	0.876263	1.29854
EOGT	na	14.2138	11.4175	20.4393	21.3228	0.803384	1.04321	1.29852
GIGYF2	na	37.7305	21.6547	45.5901	33.98	0.574026	0.745382	1.29852
CASC3	na	23.6896	22.9889	21.7665	27.4296	0.970431	1.26008	1.29847
AGO4	na	3.87334	2.15521	1.55949	1.12584	0.557379	0.723417	1.29789
SEC24B	na	42.4338	33.688	48.2778	49.7418	0.793935	1.03032	1.29774
RNF214	na	20.0584	15.2661	20.2402	19.9922	0.761182	0.987755	1.29766
CAP1	na	164.167	169.671	276.925	371.391	1.03353	1.34111	1.29761
MIA3	na	81.7897	49.5955	84.511	66.4929	0.606418	0.786817	1.29748
ZBTB5	na	8.57668	5.92682	4.41302	3.95751	0.691341	0.896975	1.29744
GM14680	na	1.90209	1.25721	2.62127	2.25168	0.662449	0.859455	1.29739
HOMER3	na	23.655	27.1197	23.1932	34.4917	1.14641	1.48697	1.29706
ZSWIM1	na	6.15584	6.20905	6.20477	8.11971	1.00863	1.30821	1.29701
CPNE8	na	30.5026	27.5302	11.9782	14.0219	0.902582	1.1705	1.29683
MACROD2	na	2.00584	1.97561	2.45536	3.13871	0.984992	1.27736	1.29682
CLIP1	na	54.3651	29.5058	62.5786	44.0443	0.542805	0.703863	1.29671
GM8822	na	21.3034	16.8568	32.5502	33.4	0.791357	1.0261	1.29664
SMURF2	na	64.6709	42.2318	46.8178	39.6433	0.653071	0.846784	1.29662
RNF44	na	40.0822	30.6861	48.0123	47.6606	0.765628	0.992676	1.29655
PISD-PS2	na	5.01459	3.13018	4.21394	3.41164	0.624842	0.809987	1.29631
ELMOD3	na	9.1646	12.4181	6.8352	12.009	1.35468	1.756	1.29625
WIPF2	na	11.2742	6.1834	10.651	7.57385	0.548792	0.711322	1.29616
USP1	na	17.845	10.853	17.4862	13.783	0.608365	0.788326	1.29581
RRM2B	na	10.2021	7.10706	9.25739	8.35852	0.696876	0.902991	1.29577
TTC37	na	16.9804	6.92746	18.5811	9.82553	0.408259	0.529003	1.29575
BCOR	na	14.6288	9.23661	22.0983	18.0817	0.631611	0.818309	1.29559
MAML3	na	3.59667	2.51441	1.95766	1.77405	0.699793	0.906614	1.29555
IFT80	na	27.1134	20.6797	17.0548	16.8535	0.762787	0.988202	1.29552
ROR1	na	19.5396	11.0583	7.39927	5.42451	0.566127	0.733416	1.2955
GM13422	na	7.02043	6.51694	7.03429	8.46087	0.928368	1.20256	1.29535
TRPM7	na	78.608	44.6693	58.1656	42.8161	0.568299	0.736145	1.29535
ZFP207	na	79.6801	76.6639	96.6883	120.499	0.962149	1.24624	1.29527
KCNC3	na	0.0691668	0.0513145	1.09496	1.09173	0.769794	0.997069	1.29524
BACE2	na	6.98585	7.4406	2.32264	3.20694	1.06502	1.37936	1.29515
GM14253	na	7.05501	7.46626	7.66472	10.5079	1.05822	1.37053	1.29513
PARD3	na	31.2288	23.1428	26.8431	25.7579	0.741143	0.959585	1.29474
TMTC3	na	23.8625	8.31295	41.5089	18.7299	0.348597	0.451337	1.29472
CREBBP	na	31.8859	18.8324	23.9564	18.3205	0.590727	0.764827	1.29472
LAYN	na	13.5913	11.5201	18.2825	20.0605	0.847704	1.0972	1.29432
DNAL1	na	18.0179	12.649	20.2733	18.4229	0.702162	0.908761	1.29423
CACNG7	na	64.4634	56.3177	69.2479	78.2972	0.873654	1.13066	1.29418
NEDD9	na	52.463	34.1241	32.5502	27.3955	0.650498	0.84168	1.2939
GM5601	na	2.66292	2.87361	3.51714	4.91277	1.07887	1.39586	1.29382
ULK1	na	22.6521	20.5001	22.4633	26.3038	0.905034	1.1709	1.29377
CBLL1	na	7.81585	4.49002	8.02971	5.97037	0.574932	0.743803	1.29372
PLK1	na	7.88501	6.02945	11.4805	11.3608	0.764922	0.98958	1.2937
LOXL4	na	39.2176	21.8343	42.2057	30.3977	0.556843	0.720283	1.29351
ZFP462	na	6.98585	3.7203	20.1406	13.8854	0.533109	0.689551	1.29345
ZSWIM8	na	79.3343	48.3639	70.741	55.7804	0.609663	0.78854	1.2934
ZWILCH	na	6.91668	5.36236	8.12925	8.15383	0.775552	1.00302	1.2933
JPH1	na	1.27959	0.898004	1.72539	1.56936	0.703733	0.910002	1.29311
STARD8	na	18.8825	15.8818	2.28946	2.4905	0.841157	1.08749	1.29285
GM7895	na	1.72917	1.33418	2.32264	2.31992	0.772673	0.998831	1.2927
ZMYND8	na	67.2993	47.9791	45.756	42.1679	0.712957	0.921595	1.29264
FAM104A	na	18.9171	21.9113	17.453	26.1332	1.15821	1.49711	1.29261
ZFP281	na	35.6901	17.8574	22.8946	14.8065	0.500465	0.646855	1.29251
ARHGAP6	na	6.43251	4.20779	9.35693	7.91501	0.654594	0.846036	1.29246
SERPINB8	na	5.70626	4.33607	5.97251	5.86803	0.760233	0.982531	1.29241
SLC35A3	na	16.9113	8.69781	17.088	11.3608	0.514561	0.665003	1.29237
HECTD1	na	65.6047	36.0741	55.9757	39.7798	0.549928	0.710705	1.29236
NOL8	na	10.3404	6.26037	11.1155	8.69969	0.605746	0.782827	1.29234
TMEM151A	na	9.85627	11.751	12.2436	18.8664	1.19208	1.54054	1.29232
SIRT3	na	9.1646	10.4938	4.67846	6.92563	1.14491	1.47946	1.29221
KDM5A	na	32.8196	17.9344	26.4781	18.6958	0.54657	0.706178	1.29202
LRRC8B	na	0.830001	0.179601	3.31806	0.95526	0.224221	0.289692	1.29199
RANBP2	na	69.651	32.713	64.8349	39.3362	0.469734	0.606765	1.29172
GM12751	na	5.01459	5.90117	5.4748	8.32441	1.1765	1.5197	1.29171
SLC4A1AP	na	15.8738	15.2917	16.4244	20.4357	0.963352	1.24411	1.29144
MECP2	na	27.9088	15.5226	23.89	17.1606	0.556325	0.718414	1.29136
SRR	na	15.6663	13.3418	10.9496	12.0431	0.851703	1.09979	1.29128
VSIG10L	na	5.87918	4.38739	2.65445	2.55873	0.74662	0.964055	1.29122
POLH	na	9.02627	6.23471	9.52283	8.49499	0.691017	0.89216	1.29108
B020018G12RIK	na	8.57668	11.3918	7.59836	13.0325	1.32791	1.71438	1.29104
TXLNG	na	3.70042	2.30915	4.91073	3.95751	0.624874	0.80622	1.29021
KLRA2	na	0.415001	0.384859	1.1945	1.43289	0.928807	1.19818	1.29002
DOK5	na	0.622501	0.538802	3.38442	3.78692	0.867331	1.11863	1.28974
SENP6	na	63.9447	50.5191	51.8281	52.8122	0.790072	1.01899	1.28974
GM10698	na	19.2284	14.2911	23.0605	22.1074	0.743341	0.958686	1.2897
TRAF3IP2	na	2.83584	2.41178	9.85464	10.8149	0.850906	1.09736	1.28964
SERINC2	na	0.415001	0.333544	15.6281	16.2735	0.807606	1.04128	1.28934
LGR5	na	21.338	14.1115	9.52283	8.11971	0.661466	0.852787	1.28924
ST7L	na	12.3809	12.5977	14.0686	18.457	1.0175	1.31174	1.28918
ZC3H8	na	1.48709	2.00127	1.49313	2.59285	1.34383	1.73241	1.28916
LBP	na	25.8338	28.6591	3.21852	4.60572	1.10933	1.42989	1.28896
STK24	na	40.1513	29.8907	48.7423	46.7736	0.744504	0.959617	1.28893
STYK1	na	13.1071	10.8274	13.0068	13.8513	0.826179	1.06488	1.28893
ZFP652	na	46.3417	28.3256	22.9942	18.1158	0.611303	0.787922	1.28892
NDST1	na	64.1522	28.3513	62.7113	35.7199	0.44201	0.56965	1.28877
FAM149A	na	30.5371	29.6598	34.3419	42.9867	0.971277	1.25167	1.28868
PML	na	13.7296	9.87804	23.9896	22.2439	0.719641	0.927258	1.2885
METTL8	na	5.32584	6.02945	4.51256	6.58447	1.13191	1.45829	1.28835
NYAP1	na	12.1734	10.9813	16.0262	18.6276	0.902144	1.16223	1.2883
ZSCAN25	na	9.64877	8.77478	7.59836	8.90439	0.909498	1.17169	1.28829
COA4	na	5.32584	8.26163	4.18076	8.35852	1.55037	1.99729	1.28826
SLU7	na	33.9263	25.2724	32.8488	31.5236	0.744983	0.959667	1.28817
2410089E03RIK	na	13.7642	7.0814	10.5514	6.99387	0.514776	0.663104	1.28814
CTNND2	na	6.29418	4.87488	5.6407	5.62921	0.774806	0.997966	1.28802
SYTL1	na	1.4525	1.28286	1.22768	1.39877	0.883879	1.13842	1.28798
ZFP518B	na	19.4359	9.82673	15.2963	9.962	0.505811	0.651461	1.28795
ATXN1	na	30.6409	19.089	25.0845	20.1287	0.623094	0.8025	1.28793
ZFP518A	na	16.0467	6.363	9.68874	4.94688	0.396845	0.511004	1.28767
MAB21L3	na	0.484167	0.384859	1.16132	1.19407	0.798378	1.028	1.28761
ACSL1	na	24.9692	22.0139	11.1487	12.6572	0.881682	1.13521	1.28755
ERF	na	37.0734	36.9208	37.7595	48.4112	0.995884	1.28203	1.28733
TCEB3	na	53.3622	46.5166	51.5627	57.8273	0.871735	1.12148	1.28649
2610015P09RIK	na	4.98001	4.10516	3.11898	3.30929	0.824623	1.06086	1.28647
EPB4.1L3	na	37.4884	26.1447	105.747	94.8778	0.697476	0.897227	1.28639
CASP3	na	14.0754	9.59581	12.6418	11.0878	0.681931	0.877158	1.28629
ZDHHC5	na	72.5905	40.2819	93.8347	66.9705	0.554971	0.713733	1.28607
DNTTIP2	na	38.768	47.4916	40.4803	63.7636	1.22497	1.57506	1.28579
GM5446	na	2.38625	1.66772	3.18534	2.86578	0.699941	0.899942	1.28574
PLAGL1	na	206.774	120.076	40.2149	30.0225	0.580728	0.746604	1.28563
MEGF9	na	31.6438	14.5733	23.6246	13.9877	0.460685	0.592228	1.28554
ZFP760	na	7.43543	4.51568	5.24253	4.09397	0.607761	0.781264	1.28548
TUFT1	na	2.10959	1.89864	4.47938	5.1857	0.9004	1.15739	1.28541
HELLS	na	5.49876	3.5407	9.72192	8.05148	0.644451	0.828326	1.28532
KAT2B	na	13.2109	8.21032	12.0446	9.62083	0.621723	0.79891	1.28499
4833412C05RIK	na	0.380417	0.384859	3.38442	4.40102	1.01142	1.29963	1.28495
TRMT61B	na	3.52751	3.79727	2.58809	3.58222	1.07629	1.38288	1.28485
GM5391	na	2.55917	3.5407	2.82035	5.01511	1.38228	1.77588	1.28475
SLC4A4	na	10.9975	4.87488	3.11898	1.77405	0.443695	0.569949	1.28455
CRTC2	na	19.92	20.2179	19.3111	25.1779	1.01495	1.30367	1.28447
RUNX2	na	46.1342	30.5834	18.3157	15.5912	0.662984	0.851317	1.28407
GM13597	na	7.19335	9.64713	6.43704	11.0878	1.34072	1.72157	1.28406
MOB1B	na	39.0792	18.4732	42.0398	25.5191	0.472825	0.6071	1.28398
SYNE1	na	19.9892	9.41621	22.7287	13.7489	0.471287	0.60506	1.28385
WBP4	na	34.5488	30.6348	28.469	32.4106	0.886737	1.13841	1.28382
ARAP2	na	3.25084	1.69338	5.04345	3.37753	0.522137	0.670234	1.28363
ZBTB1	na	40.2551	23.0146	27.9381	20.504	0.571807	0.733988	1.28363
ZFP961	na	4.70334	3.48939	4.97709	4.74218	0.742354	0.952882	1.28359
TLK1	na	36.9696	27.8894	39.2195	37.9716	0.754443	0.968189	1.28332
CD59A	na	12.3809	10.8274	46.4197	52.0958	0.874609	1.12226	1.28315
BRIP1	na	1.97125	1.43681	1.85811	1.73994	0.730027	0.936686	1.28308
RBM6	na	29.0155	25.6829	26.0136	29.5448	0.885179	1.1357	1.28302
ERLEC1	na	88.741	112.327	72.8314	118.282	1.26576	1.62398	1.283
9530077C05RIK	na	1.4525	1.59075	1.26086	1.77405	1.09463	1.40433	1.28292
JMJD8	na	12.1388	14.1628	10.7837	16.1371	1.16663	1.49605	1.28237
ARHGAP29	na	104.857	54.7526	70.3097	47.0807	0.522203	0.669658	1.28237
RTN4IP1	na	3.45834	3.25847	3.01943	3.65046	0.942346	1.20841	1.28234
MTERF3	na	20.4388	19.987	13.4381	16.8535	0.977905	1.254	1.28233
KLF4	na	55.1605	45.1311	58.6301	61.5119	0.818205	1.04915	1.28225
GSTM6	na	1.10667	0.821032	1.82493	1.73994	0.743835	0.953638	1.28206
DHX9	na	94.551	66.9398	87.4309	79.3548	0.708001	0.907638	1.28197
ACSF2	na	8.68043	7.87678	6.30431	7.33503	0.907507	1.16328	1.28184
CCAR1	na	51.6676	34.3807	56.772	48.4112	0.665476	0.852752	1.28142
E2F8	na	2.42084	1.28286	4.6121	3.13871	0.531547	0.681117	1.28139
HS3ST3B1	na	7.26251	5.10579	3.48396	3.13871	0.703376	0.90114	1.28116
TOR1AIP1	na	78.6772	63.7839	59.0615	61.3413	0.810724	1.0386	1.28107
LRRC49	na	10.0292	9.74975	7.532	9.38202	0.972162	1.24535	1.28101
LDLRAD3	na	41.7422	27.6842	6.10523	5.1857	0.663286	0.849592	1.28088
TSHZ3	na	8.09251	4.41305	11.0823	7.74443	0.545795	0.699037	1.28077
SYNJ1	na	10.375	6.0038	12.6086	9.3479	0.579018	0.741561	1.28072
MLLT3	na	35.6209	22.835	26.1795	21.4933	0.641139	0.821057	1.28062
GM13042	na	0.864585	0.333544	1.0286	0.511746	0.391683	0.50158	1.28058
TUSC2	na	11.4471	18.2166	9.15785	18.6617	1.59094	2.03683	1.28027
CYP27A1	na	3.97709	3.25847	1.59267	1.6717	0.81969	1.04937	1.2802
INPP5B	na	34.1684	28.4026	28.7012	30.5342	0.831294	1.06385	1.27975
PAXIP1	na	15.5279	12.4438	13.405	13.7489	0.801486	1.02564	1.27968
NABP2	na	21.6838	34.1498	23.9896	48.343	1.57468	2.01481	1.27951
SPTAN1	na	215.42	105.092	216.437	135.101	0.487867	0.624219	1.27949
PDZD8	na	53.293	30.1216	54.3498	39.3021	0.565276	0.723175	1.27933
GM15920	na	5.74084	6.69654	6.8352	10.2008	1.16623	1.49179	1.27916
SCARB2	na	44.3013	28.0434	37.7927	30.6024	0.633084	0.809787	1.27911
GM26682	na	1.14125	1.00063	2.15674	2.42227	0.877684	1.12264	1.27909
NCOA3	na	17.015	10.3142	18.2161	14.1242	0.606376	0.77547	1.27886
PPP1R3E	na	1.93667	0.923661	2.45536	1.50112	0.479187	0.612687	1.2786
SPIN4	na	3.42376	1.64206	1.72539	1.05761	0.48088	0.614839	1.27857
SP4	na	7.15876	2.79664	3.4176	1.70582	0.391372	0.500354	1.27846
ZFP710	na	8.57668	7.20969	10.2196	10.9855	0.840771	1.07488	1.27845
BTBD19	na	8.78418	7.28666	12.675	13.4419	0.829683	1.06046	1.27816
CIT	na	2.21334	1.02629	3.61669	2.14933	0.465708	0.595221	1.2781
GM15542	na	3.76959	4.38739	4.08121	6.07272	1.16353	1.48697	1.27799
TNFRSF10B	na	21.58	16.6516	41.4094	40.8374	0.771707	0.986189	1.27793
MTSS1	na	11.4471	6.05511	8.32833	5.62921	0.529309	0.676237	1.27758
SAV1	na	144.351	135.06	53.8853	64.4118	0.935638	1.19532	1.27755
ECHDC3	na	4.66876	5.49065	1.79175	2.6952	1.17573	1.50188	1.2774
MLKL	na	4.87626	4.33607	8.85922	10.0643	0.889412	1.1359	1.27714
MSI2	na	46.8605	25.8625	43.9975	31.0118	0.551984	0.704911	1.27705
TYW3	na	3.38917	3.10453	1.1945	1.39877	0.916221	1.16982	1.27679
SOS1	na	22.1334	9.77541	23.5914	13.3054	0.441871	0.564149	1.27673
POLB	na	9.30293	12.8286	12.3432	21.7322	1.37865	1.76014	1.27672
SH3RF1	na	10.9629	8.77478	11.1819	11.429	0.800557	1.02209	1.27672
COBL	na	42.5376	35.7662	6.76884	7.2668	0.840846	1.07347	1.27666
ARL4A	na	11.4471	12.8799	5.34208	7.6762	1.12508	1.43625	1.27657
CNOT1	na	46.8605	19.6791	44.9265	24.0862	0.420055	0.536211	1.27653
CHD6	na	35.5517	18.7298	21.6669	14.5677	0.526944	0.672475	1.27618
FAM13C	na	48.2092	24.6566	20.4393	13.3395	0.511535	0.652785	1.27613
PLEKHM3	na	7.26251	3.97687	11.6132	8.11971	0.548111	0.699396	1.27601
LGALS3BP	na	241.496	248.362	104.652	137.319	1.02843	1.31213	1.27585
RTP4	na	8.05793	12.1102	2.98625	5.73156	1.50237	1.91674	1.27581
KDM6B	na	35.033	21.8856	42.6371	33.98	0.624805	0.796998	1.27559
UBXN2A	na	14.1446	9.85238	13.9359	12.3843	0.696727	0.888729	1.27558
EGR1	na	137.849	111.891	118.919	123.126	0.811703	1.03537	1.27556
1700025G04RIK	na	7.47001	7.51757	10.4187	13.3736	1.00636	1.28339	1.27528
LRRC45	na	13.1071	13.3161	15.064	19.5146	1.01594	1.29528	1.27496
BIVM	na	15.4242	10.5451	12.2105	10.6443	0.683846	0.871826	1.27489
ERCC6	na	13.3492	6.79917	8.82604	5.73156	0.50964	0.649725	1.27487
ABI3BP	na	977.223	514.043	101.765	68.2329	0.526028	0.670522	1.27469
RFFL	na	6.05209	4.02819	4.18076	3.54811	0.666048	0.848979	1.27465
TTC28	na	54.6072	30.5578	51.1313	36.4705	0.55966	0.713318	1.27455
SGSM1	na	0.968335	0.718403	2.98625	2.83166	0.74411	0.948377	1.27451
RTF1	na	32.4392	23.1172	29.2985	26.6108	0.712705	0.908293	1.27443
AW551984	na	1.59084	0.949318	6.17159	4.70807	0.598855	0.763183	1.2744
APLF	na	6.70918	6.67088	5.27572	6.68682	0.994299	1.26705	1.27431
TSPAN13	na	1.72917	1.51378	3.0858	3.44576	0.876037	1.11634	1.2743
PAF1	na	38.4221	49.9033	46.3865	76.762	1.29875	1.65472	1.27408
OXNAD1	na	7.26251	8.56952	7.03429	10.5761	1.17976	1.50291	1.27391
ZFP568	na	9.19918	5.67025	14.334	11.2584	0.616736	0.785559	1.27374
NONO	na	81.1326	74.4573	72.566	84.8134	0.917732	1.16876	1.27353
DNAJC4	na	10.4788	12.8799	8.82604	13.8172	1.22896	1.56496	1.2734
SECISBP2L	na	52.6013	27.0941	55.0798	36.1293	0.51516	0.655997	1.27338
DLG5	na	60.3134	34.6886	66.9916	49.0594	0.575198	0.732355	1.27322
THTPA	na	15.0784	15.6509	11.7459	15.523	1.03795	1.32133	1.27302
GM10169	na	2.97417	3.20716	7.63154	10.4737	1.07812	1.37202	1.27261
ZFP362	na	30.1913	33.0209	24.3877	33.9458	1.0937	1.39179	1.27255
TTF1	na	10.3404	6.51694	7.6979	6.17507	0.630538	0.802392	1.27255
ALG12	na	7.67751	8.85175	6.8352	10.0302	1.15278	1.46686	1.27246
ZBTB10	na	10.6171	5.36236	6.10523	3.92339	0.505459	0.643118	1.27234
TAOK3	na	20.4734	14.7529	26.6772	24.4615	0.720705	0.916969	1.27232
MAP9	na	5.18751	2.48875	5.6407	3.44576	0.480598	0.611452	1.27227
CLASP1	na	38.768	25.2467	52.2926	43.3279	0.651302	0.828593	1.27221
FANCI	na	1.79834	0.923661	1.45995	0.95526	0.515876	0.656285	1.27218
UFL1	na	26.145	17.6778	16.8557	14.4995	0.676249	0.86028	1.27213
BC002163	na	6.39793	8.67215	7.39927	12.7595	1.355	1.72361	1.27204
DNAJC30	na	6.01751	9.69844	5.77342	11.8384	1.61085	2.04898	1.27198
SPAG9	na	94.3089	42.8733	93.8679	54.2792	0.454653	0.578289	1.27193
SLC38A9	na	5.04918	2.36047	4.64528	2.76343	0.468378	0.595619	1.27166
CRLS1	na	25.8338	35.7919	24.0891	42.4408	1.38534	1.76156	1.27157
CAPN6	na	146.357	118.639	53.2217	54.8592	0.810626	1.03076	1.27156
APCDD1	na	2.87042	2.02692	3.94849	3.54811	0.706997	0.898813	1.27131
SYTL2	na	43.8172	27.4533	23.8569	19.0028	0.626613	0.796608	1.27129
EPC1	na	17.4992	14.8812	14.1681	15.3183	0.850465	1.08113	1.27122
5031420N21RIK	na	4.87626	6.56826	2.68763	4.60572	1.34639	1.71145	1.27114
ZFP692	na	4.42667	3.23281	3.0858	2.86578	0.730813	0.928894	1.27104
TRUB2	na	12.7613	12.0846	10.6842	12.8619	0.947007	1.20367	1.27103
ANGEL1	na	1.69459	1.46246	1.45995	1.60347	0.863695	1.09775	1.27099
ZFP40	na	5.18751	3.46373	3.61669	3.07048	0.668242	0.849325	1.27098
BVES	na	3.32001	3.61767	1.42677	1.97875	1.08943	1.38462	1.27096
ZFP944	na	6.53626	6.5426	5.3089	6.75505	1.00097	1.27197	1.27074
ZKSCAN8	na	17.0496	7.51757	10.3523	5.79979	0.441198	0.560595	1.27062
TAF3	na	7.85043	6.0038	7.8638	7.64208	0.765024	0.971835	1.27033
SEMA3A	na	40.2205	28.5309	85.8714	77.3761	0.709422	0.901079	1.27016
ARL8A	na	54.5726	62.2188	85.3405	123.57	1.14009	1.44792	1.27
GM9762	na	16.9804	19.4995	20.937	30.5342	1.14828	1.4582	1.26991
SORBS3	na	85.2826	107.068	55.8098	88.9756	1.25542	1.59418	1.26984
PLK3	na	3.90792	3.43807	9.55601	10.6784	0.880027	1.11735	1.26968
FAM189B	na	21.7184	19.7561	34.9724	40.3938	0.909683	1.15499	1.26966
FNBP1	na	31.9551	21.6547	25.8145	22.2098	0.677746	0.860406	1.26951
C1GALT1	na	14.11	7.33797	9.921	6.55035	0.520339	0.660538	1.26944
SIN3A	na	33.373	22.9889	25.5159	22.3121	0.688926	0.874483	1.26934
CASP2	na	12.4154	7.41494	7.20019	5.45863	0.597508	0.758404	1.26928
ACVR2A	na	26.6984	14.6503	21.6006	15.0453	0.548875	0.696643	1.26922
TMEM35	na	2.21334	1.82166	1.95766	2.04699	0.823708	1.04544	1.26918
ENPEP	na	90.7468	63.5273	2.18992	1.94464	0.700078	0.888421	1.26903
TAB3	na	6.81293	3.20716	6.73566	4.02574	0.471396	0.598175	1.26894
MYO7A	na	35.7592	22.9119	23.2928	18.9346	0.640812	0.812964	1.26865
NCOA5	na	27.563	26.0678	19.8752	23.8474	0.94577	1.19977	1.26857
BTF3L4	na	11.5854	9.46752	7.89698	8.18794	0.817324	1.03681	1.26854
PLEKHG2	na	61.1089	41.1799	56.042	47.8995	0.673922	0.854728	1.26829
MDM4	na	23.0325	12.726	20.7379	14.5336	0.552685	0.700945	1.26825
PCNT	na	12.7959	6.97877	7.39927	5.11746	0.545691	0.691966	1.26806
CXCL14	na	13.1071	16.9338	569.014	932.061	1.29177	1.63802	1.26804
PLAUR	na	7.22793	7.05574	45.7229	56.5992	0.976205	1.23783	1.268
ZFP384	na	21.3034	18.5758	16.2917	18.0135	0.872018	1.10563	1.2679
RASAL2	na	10.2367	5.18276	20.2402	12.9984	0.506697	0.642354	1.26773
ATAD5	na	3.00876	1.82166	2.88671	2.21757	0.606551	0.76887	1.26761
MYCBP2	na	66.6422	30.1729	34.2424	19.6511	0.452829	0.573986	1.26756
MTURN	na	8.09251	6.64523	5.34208	5.56098	0.821342	1.04091	1.26733
TFG	na	85.2481	87.7991	103.192	134.692	1.02992	1.30523	1.26731
H19	na	1446	1878.5	1192.05	1962.48	1.2991	1.64631	1.26727
TMEM184C	na	34.4451	23.9126	44.3293	38.9951	0.694298	0.879691	1.26702
PODNL1	na	1.83292	1.79601	2.389	2.96813	0.979953	1.24157	1.26696
BCLAF1	na	85.5593	68.7358	85.805	87.3381	0.803389	1.01786	1.26696
USP2	na	3.11251	2.89927	7.16701	8.46087	0.931674	1.18032	1.26688
TNKS	na	19.5742	4.15647	19.7756	5.32216	0.212682	0.269437	1.26686
GM13578	na	4.18459	3.51504	4.67846	4.981	0.840317	1.06455	1.26684
AOX1	na	3.14709	2.02692	4.67846	3.82104	0.645008	0.817057	1.26674
CASC5	na	2.55917	1.05195	4.24712	2.21757	0.412973	0.523076	1.26661
PARP8	na	17.9834	14.8299	17.0548	17.8088	0.824727	1.04419	1.2661
PHC3	na	43.8863	21.9113	34.1097	21.5616	0.499369	0.632216	1.26603
KCTD17	na	31.8167	36.305	49.0077	70.7916	1.14103	1.44442	1.26589
C2CD5	na	11.6546	9.51884	5.90615	6.10684	0.816877	1.03393	1.26571
LPCAT2	na	10.2713	11.9306	5.01027	7.36915	1.16142	1.47002	1.26571
MAPK6	na	39.6326	27.0171	94.2993	81.3677	0.681756	0.862879	1.26567
MYH11	na	2.24792	1.89864	61.7823	66.0835	0.845196	1.06961	1.26552
D8ERTD82E	na	11.9659	8.54386	7.39927	6.68682	0.714221	0.903822	1.26547
ZFP948	na	10.6171	6.85049	12.7414	10.4055	0.645511	0.816793	1.26534
SMPDL3A	na	67.2647	61.8596	34.0101	39.5751	0.919655	1.16359	1.26524
NUP54	na	9.02627	8.82609	8.32833	10.3032	0.977844	1.23688	1.26491
HOOK3	na	48.7972	21.706	53.1221	29.886	0.444917	0.562659	1.26464
TBC1D22B	na	12.3809	15.2147	11.4141	17.7405	1.22874	1.55386	1.26459
FEZ1	na	6.74376	5.97814	53.1885	59.6355	0.88661	1.12119	1.26458
RPGRIP1L	na	7.02043	3.3611	6.70248	4.05985	0.479382	0.606217	1.26458
PAK4	na	71.5185	64.1944	102.196	115.996	0.897605	1.13502	1.2645
NAIF1	na	6.32876	6.15774	6.07205	7.4715	0.973013	1.23016	1.26428
CLCA1	na	18.8134	15.6509	13.1727	13.8513	0.831979	1.05148	1.26383
HEG1	na	34.9292	19.0377	27.1417	18.6958	0.545145	0.688917	1.26373
ZFP746	na	20.8192	17.4726	17.9175	19.0028	0.839318	1.06055	1.26358
ATXN7L1	na	8.81876	8.77478	7.00111	8.80204	0.995017	1.25693	1.26322
GDF6	na	1.59084	1.02629	3.55032	2.8999	0.646986	0.817229	1.26313
CHORDC1	na	31.6784	21.783	37.3945	32.4788	0.687712	0.868574	1.26299
EDEM3	na	48.2784	21.4495	64.4035	36.1293	0.444383	0.56104	1.26251
UTRN	na	73.9739	31.5071	83.051	44.6584	0.425987	0.537769	1.26241
G6PDX	na	41.0505	38.5115	43.2675	51.2429	0.938163	1.18429	1.26235
CACNA2D3	na	27.8396	22.9889	9.55601	9.962	0.825814	1.04245	1.26233
KIF2A	na	27.4592	21.1929	34.7733	33.8776	0.771865	0.974249	1.2622
PCYT1A	na	37.1771	20.8337	39.0204	27.6002	0.560489	0.70739	1.2621
GJC1	na	26.4217	27.4789	14.2677	18.7299	1.04	1.31257	1.26209
ZBTB44	na	16.0121	11.6997	12.8741	11.8725	0.730819	0.922254	1.26195
CALD1	na	1023.74	580.931	1494.82	1070.44	0.567465	0.7161	1.26193
MYO9A	na	28.2892	14.445	22.1315	14.2607	0.510765	0.644496	1.26183
ALS2CL	na	2.55917	1.71904	6.27113	5.32216	0.672788	0.848878	1.26173
PIP4K2A	na	11.5509	10.7247	18.5811	21.7663	0.928531	1.17134	1.2615
GM6457	na	3.90792	4.92619	4.24712	6.75505	1.26001	1.58934	1.26137
PHACTR1	na	34.5488	25.9138	2.48855	2.35403	0.750125	0.946129	1.2613
ELF1	na	30.7101	16.6516	27.5399	18.8323	0.542343	0.683914	1.26103
ARMCX5	na	5.36043	4.0795	6.00569	5.76568	0.761414	0.960091	1.26093
TGFBRAP1	na	19.2284	14.522	18.8798	17.9794	0.755345	0.95233	1.26079
MBNL1	na	141.654	81.2822	173.501	125.514	0.573835	0.723433	1.2607
TMEM104	na	14.0063	11.3148	24.5205	24.9732	0.807956	1.01846	1.26054
GTSE1	na	10.8938	9.18529	27.5399	29.2719	0.84329	1.06287	1.26039
C530008M17RIK	na	3.45834	2.15521	5.6407	4.43514	0.624103	0.786591	1.26035
IQGAP2	na	3.66584	2.33481	1.3604	1.09173	0.637738	0.80371	1.26025
ANKRD1	na	2.04042	1.89864	65.4985	76.8302	0.930797	1.17298	1.26019
GM11918	na	1.52167	0.74406	1.16132	0.716445	0.491776	0.619668	1.26006
IDS	na	124.569	65.9648	95.5269	63.7295	0.529574	0.667165	1.25981
SUPT6	na	70.3426	45.8495	68.352	56.1215	0.651844	0.821088	1.25964
TTC9C	na	24.3813	17.3443	26.6108	23.8474	0.711477	0.896186	1.25961
MICAL3	na	9.92543	7.13272	8.32833	7.53973	0.718868	0.905406	1.25949
AFF4	na	106.448	49.6981	111.918	65.8106	0.46692	0.588055	1.25943
1810022K09RIK	na	4.49584	4.59265	5.67388	7.30092	1.02149	1.28634	1.25927
GM5611	na	3.25084	4.56699	2.62127	4.63983	1.40382	1.76762	1.25915
ECHDC2	na	21.165	19.4225	8.02971	9.27967	0.917703	1.1555	1.25913
ARL8B	na	68.7864	51.6737	73.7937	69.8022	0.75125	0.945917	1.25912
ZFP91	na	65.6739	37.8701	77.6758	56.3945	0.576693	0.726053	1.25899
SLC25A22	na	14.2829	12.9313	16.7894	19.1393	0.905419	1.1399	1.25897
EBAG9	na	16.8767	18.8068	12.0114	16.8535	1.11431	1.40285	1.25894
GM6733	na	10.7554	6.9018	11.7791	9.51848	0.641982	0.808218	1.25894
RPF1	na	14.0754	17.2417	10.0205	15.4547	1.22481	1.54185	1.25885
TUBD1	na	5.04918	4.90053	2.98625	3.65046	0.97061	1.2218	1.25879
CHAMP1	na	30.1913	25.6829	20.0079	21.4251	0.850714	1.0708	1.25871
COA5	na	59.6218	36.4846	70.4756	54.2792	0.611989	0.770212	1.25854
BRD3	na	54.538	37.0747	45.0593	38.5516	0.679845	0.855602	1.25852
CALR-PS	na	17.1188	18.7811	20.7047	28.5896	1.09706	1.38067	1.25852
SFR1	na	144.593	157.433	150.275	205.824	1.08879	1.36963	1.25793
ASUN	na	15.0438	15.1121	16.0926	20.3334	1.00454	1.26339	1.25768
PSKH1	na	38.9409	33.8932	32.3179	35.3787	0.870404	1.09469	1.25768
CLN3	na	6.39793	4.54133	5.04345	4.50337	0.710193	0.893092	1.25753
EBF3	na	48.6934	31.0709	11.4805	9.21144	0.638155	0.8025	1.25753
PEX12	na	10.6171	8.41558	6.53658	6.51624	0.792807	0.996892	1.25742
ZFP868	na	7.05501	7.41494	4.87755	6.448	1.05096	1.32142	1.25735
IDE	na	30.3642	23.3738	50.9654	49.3324	0.769843	0.967963	1.25735
CWC27	na	10.4788	13.2905	7.76426	12.3843	1.26811	1.59439	1.2573
FYCO1	na	33.2001	16.6002	52.0935	32.7518	0.500133	0.62877	1.25721
SLC38A6	na	4.04626	3.02756	4.31348	4.05985	0.748757	0.941316	1.25717
LIMA1	na	157.666	137.651	224.666	246.525	0.873064	1.09729	1.25683
RB1CC1	na	30.5717	17.7805	65.8967	48.1724	0.581713	0.731063	1.25674
JDP2	na	89.9168	109.249	44.3293	67.687	1.21498	1.52681	1.25666
GATSL2	na	15.2859	9.7241	24.1555	19.3099	0.636349	0.79947	1.25634
PPP2R3A	na	15.2167	9.33924	13.1395	10.1326	0.613962	0.771299	1.25626
FMNL2	na	21.9259	11.8536	27.5731	18.7299	0.540799	0.67938	1.25625
NELL2	na	6.77834	6.51694	4.74483	5.73156	0.961483	1.20759	1.25597
HECW1	na	1.0375	0.564459	1.09496	0.750561	0.547711	0.687859	1.25588
ICK	na	28.1163	20.5515	17.6521	16.2053	0.731025	0.918078	1.25588
APEX1	na	6.46709	6.85049	6.76884	9.00674	1.05921	1.33021	1.25585
PPP4R1L-PS	na	18.0179	15.7279	9.02512	9.89376	0.872961	1.09616	1.25568
DIEXF	na	9.13002	8.08203	6.53658	7.2668	0.885321	1.11157	1.25556
ARHGAP24	na	20.5425	20.885	21.6006	27.5661	1.01666	1.27607	1.25515
PDE5A	na	67.9218	40.6154	11.9118	8.9385	0.598023	0.750564	1.25508
MLLT4	na	32.7851	18.7298	26.3122	18.8664	0.5714	0.71711	1.25501
FAT4	na	324.773	159.178	77.0454	47.3877	0.490133	0.615104	1.25497
GTF3C3	na	15.5971	12.7773	13.1395	13.5101	0.819307	1.02819	1.25495
PRR11	na	4.01167	2.92493	7.8638	7.19857	0.729669	0.915495	1.25467
CAR11	na	5.42959	6.13208	6.13841	8.69969	1.12918	1.41669	1.25461
TUBG2	na	6.88209	7.90243	4.37984	6.31154	1.14808	1.4402	1.25444
SMG8	na	14.6634	11.828	14.4999	14.6701	0.806746	1.01173	1.25408
FOXJ3	na	27.39	14.9838	20.7379	14.2265	0.547193	0.686145	1.25394
ARID3A	na	2.14417	1.66772	3.28488	3.20694	0.778659	0.976335	1.25387
RASSF5	na	12.2425	11.5201	11.016	12.9984	0.941032	1.17982	1.25375
ZBTB38	na	26.1796	15.42	32.1188	23.7109	0.589139	0.738293	1.25317
SMIM1	na	27.2517	30.096	13.8031	19.1052	1.10434	1.38389	1.25314
FLRT2	na	113.088	62.2445	77.4103	53.3922	0.550442	0.689763	1.25311
GRIA3	na	88.5335	51.4171	68.352	49.7418	0.580804	0.727762	1.25302
WDR48	na	35.8976	31.1222	31.0902	33.7753	0.867005	1.08634	1.25298
GON4L	na	6.77834	3.82293	6.37068	4.50337	0.56453	0.707275	1.25286
GM12715	na	14.4213	7.13272	31.9197	19.7875	0.49489	0.620015	1.25283
PTEN	na	69.5126	45.2337	70.177	57.2132	0.650769	0.815293	1.25281
TRIM24	na	25.1421	19.7561	23.3923	23.0286	0.785847	0.984456	1.25273
DUSP7	na	21.338	23.2711	22.0983	30.193	1.09056	1.36617	1.25272
POLD3	na	7.74668	7.87678	6.10523	7.77855	1.01678	1.2737	1.25269
CKAP2L	na	9.82168	8.10769	11.3809	11.7702	0.825638	1.03417	1.25258
TTC21B	na	16.9804	12.3155	12.5423	11.3949	0.72541	0.90858	1.25251
TUSC1	na	3.28542	4.2591	4.18076	6.78917	1.29561	1.62266	1.25243
WDFY3	na	35.4826	16.8568	37.0959	22.0733	0.475197	0.595125	1.25238
RNF144B	na	4.56501	3.74596	1.65903	1.70582	0.82091	1.02806	1.25234
MYH10	na	292.057	156.304	378.259	253.451	0.535197	0.670054	1.25198
APBB1IP	na	9.5796	7.67152	18.8134	18.8664	0.800992	1.00282	1.25197
TGS1	na	9.71793	6.59391	9.55601	8.11971	0.678807	0.849828	1.25194
2900052L18RIK	na	1.69459	1.30852	1.69221	1.63759	0.773298	0.967881	1.25163
RBL2	na	41.9151	30.1986	22.8946	20.6404	0.720527	0.901577	1.25128
B4GALNT1	na	31.298	37.0491	47.4483	70.2798	1.1837	1.4811	1.25125
GCC2	na	20.2659	8.03072	15.8935	7.88089	0.396518	0.496122	1.2512
WASF1	na	4.25376	3.20716	6.47022	6.10684	0.754442	0.943911	1.25114
HDLBP	na	439.347	292.339	617.093	513.725	0.665399	0.832495	1.25112
MTDH	na	67.4722	38.3063	92.6071	65.7765	0.567788	0.710301	1.251
ZFP606	na	10.5825	9.80107	4.18076	4.84453	0.926215	1.15845	1.25074
ARHGEF12	na	51.5293	23.3224	50.8659	28.7943	0.452695	0.566154	1.25063
SCAF1	na	79.5764	72.1482	81.6575	92.592	0.906663	1.13389	1.25062
TXLNA	na	62.3193	41.9753	53.4208	44.9996	0.673596	0.842386	1.25058
EFNA2	na	8.99168	10.032	2.68763	3.75281	1.11559	1.39509	1.25055
STAMBP	na	17.8104	17.0877	17.088	20.504	0.959441	1.19981	1.25053
CAMSAP1	na	16.0467	9.87804	19.0125	14.6359	0.615782	0.769909	1.25029
FAM49B	na	16.4271	12.8543	27.4404	26.8496	0.782615	0.978479	1.25027
KRR1	na	17.6029	16.8825	15.9599	19.1393	0.95909	1.19911	1.25026
NIPAL3	na	3.52751	2.6427	3.74941	3.51399	0.749763	0.937353	1.2502
PTPRD	na	24.5196	13.7523	20.4393	14.3289	0.561019	0.701171	1.24982
GM2830	na	1.90209	3.33544	2.78717	6.10684	1.75026	2.18748	1.2498
TMEM198B	na	10.2713	8.46689	16.0926	16.5806	0.824471	1.03031	1.24966
NIN	na	18.9171	9.5445	15.5285	9.79141	0.504762	0.630743	1.24958
WIPF1	na	32.0934	22.3475	26.5445	23.0968	0.696405	0.870159	1.2495
TAMM41	na	6.15584	7.23534	4.64528	6.82329	1.17512	1.46802	1.24925
TBCEL	na	36.7967	18.7811	32.5833	20.7769	0.510513	0.637747	1.24923
POLK	na	12.2079	7.00443	19.842	14.2265	0.574053	0.717111	1.24921
CENPC1	na	13.5913	9.9037	15.9267	14.4995	0.728848	0.910436	1.24914
SH3GLB1	na	105.894	86.1314	144.8	147.11	0.813386	1.01595	1.24904
GM3788	na	17.3609	16.4976	23.4255	27.8049	0.9503	1.18688	1.24896
NRBP2	na	32.5084	27.9921	14.4336	15.523	0.861108	1.07543	1.2489
ARHGEF28	na	13.4529	9.03135	14.9313	12.5207	0.671534	0.838648	1.24885
CTDP1	na	13.9025	12.3411	16.5239	18.3205	0.887758	1.10867	1.24884
PACSIN2	na	49.6272	44.8489	65.2331	73.6232	0.903732	1.1286	1.24882
GALM	na	7.81585	8.51821	8.19561	11.1561	1.08977	1.36086	1.24876
PARP4	na	11.3088	8.28729	8.75968	8.01736	0.733018	0.915338	1.24873
SAMD4	na	55.9905	31.4558	104.751	73.4868	0.561871	0.701561	1.24861
EFCAB14	na	37.2117	21.2442	35.9014	25.5873	0.570997	0.712778	1.2483
KIN	na	8.30001	10.6221	7.06747	11.2925	1.27949	1.59711	1.24824
HIP1	na	35.0676	20.7567	37.2618	27.532	0.592004	0.738937	1.2482
PRPF8	na	143.452	79.6144	95.8919	66.4247	0.555016	0.69273	1.24813
CHST11	na	35.1021	19.3712	27.2413	18.764	0.55196	0.688905	1.24811
GPBP1	na	63.1839	47.158	52.1931	48.6159	0.746396	0.931474	1.24796
UTP11L	na	36.3817	49.4415	31.8866	54.0745	1.35888	1.69566	1.24783
PPIG	na	52.2209	48.8257	50.7663	59.2261	0.934995	1.16661	1.24772
CAPRIN1	na	203.177	146.195	233.16	209.304	0.719555	0.897689	1.24756
ERCC6L2	na	29.6034	17.8574	21.0365	15.83	0.603335	0.752601	1.2474
HOXB6	na	0.899168	1.30852	8.19561	14.8406	1.45105	1.80998	1.24736
CHD9	na	16.8075	7.15837	23.6909	12.589	0.426189	0.531548	1.24721
PNN	na	39.0792	26.3757	35.5032	29.886	0.674997	0.841819	1.24714
PCSK2	na	2.00584	1.53943	1.45995	1.39877	0.768445	0.958338	1.24711
DDX10	na	16.1504	14.0089	14.6326	15.83	0.867466	1.08178	1.24706
PDE4A	na	17.015	11.2122	18.8466	15.4889	0.659128	0.821918	1.24698
EXOC3L	na	0.691668	0.692746	1.22768	1.53524	1.00154	1.24882	1.2469
ZGRF1	na	3.11251	1.48812	2.68763	1.60347	0.479512	0.597866	1.24682
CDC42BPB	na	61.3855	28.0947	61.9482	35.3446	0.45775	0.570609	1.24655
ZFP106	na	67.9564	45.5929	76.6472	64.1048	0.670955	0.83638	1.24655
FOXS1	na	1.14125	1.20589	9.22421	12.1454	1.05623	1.31641	1.24633
ELMO1	na	8.88793	5.54197	1.62585	1.26231	0.623893	0.777546	1.24628
SESTD1	na	16.0467	11.1866	20.7711	18.0476	0.697284	0.868935	1.24617
SERBP1	na	215.662	231.788	241.721	323.731	1.07477	1.33926	1.24609
BAIAP2L1	na	5.91376	5.08014	8.82604	9.45025	0.859236	1.07066	1.24606
GRAMD1B	na	7.0896	5.20842	8.79286	8.05148	0.73497	0.915764	1.24599
HOXC5	na	0.484167	0.487488	10.5514	13.2372	1.00674	1.25434	1.24594
WDR47	na	6.50168	5.10579	9.65555	9.45025	0.78558	0.978756	1.2459
DENND4A	na	34.2376	19.5508	17.9839	12.7937	0.571139	0.71153	1.24581
IGFBP5	na	4210.87	2618.19	211.958	164.168	0.62177	0.774542	1.2457
RNF167	na	21.9259	25.0415	10.7173	15.25	1.14204	1.4226	1.24566
ATF7	na	47.9672	21.6291	33.3465	18.7299	0.45101	0.561786	1.24562
ZFP329	na	6.43251	3.20716	6.20477	3.85516	0.499238	0.621832	1.24556
GM12258	na	4.28834	3.10453	1.89129	1.70582	0.724485	0.902366	1.24553
DISP1	na	29.465	20.5258	33.1474	28.7601	0.696701	0.867677	1.24541
GM28933	na	22.7559	18.7298	11.0823	11.3608	0.82314	1.02511	1.24536
DTX3L	na	4.84167	2.59138	4.91073	3.27518	0.536028	0.667511	1.24529
IGLON5	na	12.1388	17.4982	24.9186	44.7266	1.44121	1.79464	1.24523
SEMA4G	na	5.53334	3.61767	5.90615	4.81042	0.654319	0.814739	1.24517
ZC3H18	na	30.1913	23.2455	28.9667	27.7708	0.770003	0.958727	1.24509
ZEB1	na	63.9101	43.7456	108.534	92.4896	0.684528	0.852185	1.24492
VPS13A	na	5.36043	2.00127	8.06289	3.75281	0.374319	0.465997	1.24492
MAMDC2	na	3.63126	2.89927	10.1201	10.0643	0.798885	0.994497	1.24486
NUP153	na	29.3613	12.4181	32.9815	17.3653	0.423106	0.526635	1.24469
D1ERTD622E	na	6.08668	6.08077	9.02512	11.2243	0.999031	1.24345	1.24465
CCDC84	na	1.83292	2.12955	1.79175	2.59285	1.1611	1.44502	1.24453
PMS2	na	5.18751	4.49002	4.14758	4.46925	0.865761	1.0774	1.24446
POLR3F	na	12.0696	7.77415	11.4473	9.17732	0.644356	0.801846	1.24441
RALGAPB	na	32.5084	16.8055	36.6977	23.6086	0.517083	0.643406	1.2443
CADM2	na	2.49	1.82166	2.62127	2.38815	0.732492	0.91135	1.24418
ATP11B	na	37.5576	18.8068	34.5078	21.4933	0.500856	0.622946	1.24376
BUD13	na	11.3779	14.445	9.22421	14.5677	1.26937	1.57877	1.24374
WDR37	na	11.8967	8.18466	11.0823	9.48437	0.688198	0.85592	1.24371
SMC4	na	53.3968	28.8901	41.2767	27.7708	0.541117	0.672862	1.24347
TCAIM	na	7.22793	6.23471	5.34208	5.73156	0.862745	1.07279	1.24347
KIRREL3	na	9.26835	9.98067	3.28488	4.40102	1.07679	1.33892	1.24344
RNF6	na	39.598	34.6886	47.5146	51.7546	0.876046	1.08922	1.24334
LAMC1	na	168.629	68.3766	142.113	71.6445	0.405516	0.504169	1.24328
NEO1	na	174.577	103.681	93.1711	68.7787	0.593918	0.738221	1.24297
ST6GAL1	na	3.07792	2.48875	9.02512	9.07497	0.809102	1.00552	1.24276
DAZAP1	na	46.1342	54.2138	40.3476	58.9191	1.1751	1.46019	1.24261
WIZ	na	39.0792	29.9164	30.1612	28.6919	0.765581	0.9513	1.24259
GALNT4	na	16.6346	11.4944	13.0732	11.2243	0.691151	0.858667	1.24237
PITRM1	na	45.7538	34.9195	47.7137	45.2384	0.763248	0.94813	1.24223
ICE1	na	35.3442	16.1641	25.2836	14.363	0.457461	0.568219	1.24211
SLC52A2	na	13.4184	12.6747	11.5137	13.5101	0.944612	1.17327	1.24207
EFCAB11	na	2.10959	1.74469	1.09496	1.12584	0.827715	1.02799	1.24196
CENPK	na	2.80125	3.69464	2.28946	3.75281	1.31797	1.63683	1.24193
GPATCH1	na	10.1329	12.1359	7.49882	11.1561	1.1975	1.48717	1.24189
ZFP772	na	3.00876	3.41241	2.0572	2.8999	1.13379	1.40797	1.24183
AU019823	na	16.1159	13.8293	10.9164	11.6337	0.858188	1.06566	1.24175
TRUB1	na	6.50168	6.85049	5.10981	6.68682	1.05358	1.30812	1.24159
UPF2	na	28.808	23.1428	27.7058	27.6343	0.803406	0.99742	1.24149
MLH3	na	6.29418	4.56699	8.85922	7.98324	0.725955	0.901216	1.24142
PPP1R21	na	19.678	16.5746	17.5194	18.3205	0.842359	1.04571	1.2414
SRCAP	na	38.5951	21.1929	44.8934	30.6024	0.549207	0.681729	1.2413
SCMH1	na	21.3034	21.3212	24.8523	30.8754	1.00084	1.24227	1.24124
CD97	na	19.1592	15.8305	26.2459	26.9179	0.826338	1.0256	1.24113
ROCK2	na	82.9656	40.5128	232.43	140.867	0.48836	0.606075	1.24104
SIPA1L1	na	69.2014	45.2081	55.0466	44.6243	0.653325	0.810692	1.24087
GM14769	na	0.830001	0.667088	1.1945	1.19407	0.805682	0.999645	1.24074
NMT2	na	14.3867	11.6227	23.8569	23.9156	0.807993	1.00246	1.24068
F11R	na	1.10667	1.30852	8.66014	12.6913	1.18102	1.46504	1.24048
PDE3B	na	7.19335	4.18213	4.4462	3.20694	0.581876	0.721802	1.24047
RAD9B	na	4.42667	3.51504	1.59267	1.56936	0.794449	0.985439	1.24041
ZFP512	na	18.3638	15.5996	12.0114	12.6572	0.849546	1.05373	1.24035
PLEKHG3	na	12.9342	9.67278	16.2917	15.1136	0.748009	0.927724	1.24026
RSBN1	na	6.05209	2.23218	5.44162	2.4905	0.369701	0.45851	1.24022
RBMS3	na	61.4547	31.3532	47.4483	30.0225	0.51025	0.632806	1.24019
PIK3CA	na	49.143	33.4314	44.1966	37.2893	0.680343	0.843744	1.24017
RGL1	na	55.7484	41.5904	21.866	20.231	0.746075	0.925256	1.24016
LIMCH1	na	72.6251	44.6436	9.48965	7.23268	0.614758	0.762375	1.24012
TNFRSF11B	na	56.2672	40.5385	116.63	104.192	0.720505	0.89336	1.23991
DOPEY1	na	12.7959	6.56826	9.0583	5.76568	0.51363	0.636843	1.23989
METTL22	na	4.15001	5.28539	3.64987	5.76568	1.27304	1.57837	1.23985
ZFP36	na	20.3005	17.6522	17.1212	18.457	0.8696	1.07798	1.23963
PRC1	na	16.0121	14.445	25.4163	28.419	0.902183	1.1181	1.23933
ZFP84	na	6.36334	3.82293	5.17617	3.85516	0.601299	0.745201	1.23932
ENDOV	na	25.2805	25.7086	12.0446	15.1818	1.01693	1.26029	1.23931
1810055G02RIK	na	60.6939	74.5856	74.1255	112.891	1.22885	1.52292	1.2393
SASS6	na	2.66292	2.10389	3.51714	3.44576	0.790729	0.979752	1.23905
ATXN7	na	8.1271	3.25847	10.0205	4.981	0.401556	0.497499	1.23893
1500011B03RIK	na	3.66584	5.20842	2.88671	5.08335	1.41984	1.75874	1.23869
DCAF4	na	13.4875	17.3956	7.96334	12.7254	1.28958	1.59737	1.23868
TIMP2	na	1667.3	1283.25	2269.92	2163.9	0.769657	0.953296	1.2386
HOMER1	na	4.73792	2.95058	10.3855	8.01736	0.623425	0.772158	1.23857
IL4I1	na	3.28542	3.8999	1.22768	1.80817	1.18656	1.46963	1.23856
ISPD	na	1.27959	1.10326	1.65903	1.77405	0.863099	1.06898	1.23854
9630033F20RIK	na	5.63709	6.23471	9.98736	13.6807	1.10586	1.36949	1.2384
NIM1K	na	2.87042	2.4631	2.91989	3.10459	0.858509	1.06308	1.23828
OGN	na	4304.11	3154.12	415.653	377.157	0.732817	0.907386	1.23822
ARHGEF7	na	34.7563	29.2493	37.1291	38.688	0.841591	1.04198	1.2381
CCDC71L	na	13.5221	10.6991	9.85464	9.65495	0.791358	0.979754	1.23807
HSPA8	na	81.2018	73.7389	101.134	113.676	0.908104	1.124	1.23774
GABBR1	na	22.3409	16.0614	16.0262	14.2607	0.719032	0.88989	1.23762
GTDC1	na	7.43543	5.69591	5.10981	4.84453	0.766313	0.948169	1.23731
ITGB8	na	1.76375	0.615774	1.0286	0.443514	0.352206	0.43578	1.23729
1600012H06RIK	na	40.5663	37.6392	44.4288	51.0041	0.927858	1.14797	1.23722
ABCC10	na	5.56793	2.87361	4.37984	2.79755	0.516828	0.639423	1.23721
PXN	na	41.3272	39.2556	40.414	47.4901	0.949884	1.17505	1.23705
[truncated: 10,370 more rows]
