# Supplementary material for: IGF2 mRNA binding protein-2 is a tumor promoter that drives cancer proliferation through its client mRNAs IGF2 and HMGA1
Source: eLife. 2017 Jul 28;6:e27155. doi: 10.7554/eLife.27155 (PMC5576481; doi:10.7554/eLife.27155)
Supplement: Supplementary file 2. [file elife-27155-supp2.xlsx]

## Sheet: Summary Data
				Average %RA			%RA STDEV			Log2(Ratio)		IMP2-KO/Wt
Protein annotation	Gene symbol	Protein description	# of peptides used for quantification	WT	IMP2-KO		WT	IMP2-KO		IMP2-KO/Wt		BH p-value
sp|Q8BLI4|DSE_MOUSE	Dse	Dermatan-sulfate epimerase OS=Mus musculus GN=Dse PE=2 SV=1	16	5.16092	23.6531		0.272106	0.305406		2.19633		0.000634819
sp|Q80W94|MOGT2_MOUSE	Mogat2	2-acylglycerol O-acyltransferase 2 OS=Mus musculus GN=Mogat2 PE=1 SV=1	1	24.5932	1.15847		0.415777	0.559605		-4.40797		0.00103754
tr|Q7TNL7|Q7TNL7_MOUSE	Dusp9	Dual specificity phosphatase 9 OS=Mus musculus GN=Dusp9 PE=2 SV=1	2	23.4874	0.240149		0.751218	0.231351		-6.61182		0.00115363
sp|Q8K389|CK5P2_MOUSE	Cdk5rap2	CDK5 regulatory subunit-associated protein 2 OS=Mus musculus GN=Cdk5rap2 PE=1 SV=3	17	16.8131	8.9913		0.438173	0.394743		-0.902984		0.00132385
sp|P27048|RSMB_MOUSE	Snrpb	Small nuclear ribonucleoprotein-associated protein B OS=Mus musculus GN=Snrpb PE=1 SV=1	8	17.0088	6.77036		0.129043	0.758939		-1.32897		0.00133011
sp|Q922J3|CLIP1_MOUSE	Clip1	CAP-Gly domain-containing linker protein 1 OS=Mus musculus GN=Clip1 PE=1 SV=1	70	9.19081	17.8454		0.48491	0.44505		0.95729		0.00134876
sp|P62880|GBB2_MOUSE	Gnb2	Guanine nucleotide-binding protein G(I)/G(S)/G(T) subunit beta-2 OS=Mus musculus GN=Gnb2 PE=1 SV=3	4	8.85396	17.4526		0.614715	0.199282		0.979045		0.00134887
sp|Q9CWR7|STEA1_MOUSE	Steap1	Metalloreductase STEAP1 OS=Mus musculus GN=Steap1 PE=1 SV=2	6	15.1684	1.5253		0.903921	0.317829		-3.31391		0.0013592
sp|Q9QUN7|TLR2_MOUSE	Tlr2	Toll-like receptor 2 OS=Mus musculus GN=Tlr2 PE=1 SV=1	3	24.9963	0.922087		1.65697	0.291526		-4.76067		0.00136172
tr|B7ZNL9|B7ZNL9_MOUSE	Tatdn2	Tatdn2 protein OS=Mus musculus GN=Tatdn2 PE=2 SV=1	1	16.2797	9.00087		0.386284	0.387085		-0.854941		0.00136926
tr|E9PYK3|E9PYK3_MOUSE	Parp4	Uncharacterized protein OS=Mus musculus GN=Parp4 PE=4 SV=1	10	8.14114	18.0241		0.23468	0.659789		1.14663		0.00137873
sp|Q64131-2|RUNX3_MOUSE	Runx3	Isoform 2 of Runt-related transcription factor 3 OS=Mus musculus GN=Runx3	1	21.9522	2.86844		1.37436	0.511337		-2.93603		0.00138403
sp|O55236|MCE1_MOUSE	Rngtt	mRNA-capping enzyme OS=Mus musculus GN=Rngtt PE=1 SV=1	6	18.0759	7.43437		0.510414	0.614052		-1.28179		0.00138516
sp|Q9DB00|GON4L_MOUSE	Gon4l	GON-4-like protein OS=Mus musculus GN=Gon4l PE=1 SV=3	3	16.9423	8.67553		0.5444	0.191585		-0.965608		0.00138627
sp|Q99MB2|MTFR1_MOUSE	Mtfr1	Mitochondrial fission regulator 1 OS=Mus musculus GN=Mtfr1 PE=1 SV=1	3	14.8746	9.33579		0.0975126	0.416212		-0.672003		0.00138747
sp|Q8BWD8|CDK19_MOUSE	Cdk19	Cyclin-dependent kinase 19 OS=Mus musculus GN=Cdk19 PE=2 SV=1	3	16.7499	8.65737		0.480024	0.411022		-0.952154		0.00139136
sp|Q6PDX6-2|RN220_MOUSE	Rnf220	Isoform 2 of E3 ubiquitin-protein ligase Rnf220 OS=Mus musculus GN=Rnf220	2	18.864	7.04689		0.754149	0.537859		-1.42058		0.00139252
sp|Q9CQ19|MYL9_MOUSE	Myl9	Myosin regulatory light polypeptide 9 OS=Mus musculus GN=Myl9 PE=1 SV=3	40	11.6904	7.49554		0.182409	0.25572		-0.64122		0.0013971
sp|P26645|MARCS_MOUSE	Marcks	Myristoylated alanine-rich C-kinase substrate OS=Mus musculus GN=Marcks PE=1 SV=2	20	8.12259	18.9454		0.757913	0.370977		1.22184		0.00140277
sp|Q80YV4-2|PANK4_MOUSE	Pank4	Isoform 2 of Pantothenate kinase 4 OS=Mus musculus GN=Pank4	7	19.1456	10.0283		0.518751	0.367723		-0.932942		0.00141209
sp|Q69ZR2|HECD1_MOUSE	Hectd1	E3 ubiquitin-protein ligase HECTD1 OS=Mus musculus GN=Hectd1 PE=1 SV=2	48	8.60027	16.1691		0.233493	0.515487		0.910789		0.0014127
sp|Q9D2D7|ZN687_MOUSE	Znf687	Zinc finger protein 687 OS=Mus musculus GN=Znf687 PE=2 SV=1	2	17.5569	5.65932		0.50215	0.725572		-1.63334		0.00141689
sp|P56873|SSA27_MOUSE	Sssca1	Sjoegren syndrome/scleroderma autoantigen 1 homolog OS=Mus musculus GN=Sssca1 PE=2 SV=1	8	16.3137	5.5713		0.679415	0.423132		-1.55		0.00141784
sp|Q9JM55|TOB2_MOUSE	Tob2	Protein Tob2 OS=Mus musculus GN=Tob2 PE=2 SV=1	1	15.103	6.13185		0.646644	0.129535		-1.30044		0.0014186
sp|Q9CPX6|ATG3_MOUSE	Atg3	Ubiquitin-like-conjugating enzyme ATG3 OS=Mus musculus GN=Atg3 PE=1 SV=1	11	9.0575	17.8056		0.514266	0.447422		0.975149		0.00141993
sp|Q6ZPF4|FMNL3_MOUSE	Fmnl3	Formin-like protein 3 OS=Mus musculus GN=Fmnl3 PE=2 SV=2	12	14.3147	6.75435		0.132776	0.54299		-1.08361		0.00142504
sp|Q9DC71|RT15_MOUSE	Mrps15	28S ribosomal protein S15, mitochondrial OS=Mus musculus GN=Mrps15 PE=2 SV=2	8	16.0163	6.56883		0.475891	0.503567		-1.28584		0.00143176
sp|Q5SVQ0-2|MYST2_MOUSE	Myst2	Isoform 2 of Histone acetyltransferase MYST2 OS=Mus musculus GN=Myst2	6	16.7698	7.21078		0.592266	0.303827		-1.21764		0.00143619
sp|Q3U5F4|YRDC_MOUSE	Yrdc	YrdC domain-containing protein, mitochondrial OS=Mus musculus GN=Yrdc PE=1 SV=1	4	19.7617	4.55141		1.02762	0.413189		-2.11833		0.00144638
sp|P01831|THY1_MOUSE	Thy1	Thy-1 membrane glycoprotein OS=Mus musculus GN=Thy1 PE=1 SV=1	6	8.47919	0.200117		0.597246	0.101772		-5.40501		0.00144679
sp|P97445|CAC1A_MOUSE	Cacna1a	Voltage-dependent P/Q-type calcium channel subunit alpha-1A OS=Mus musculus GN=Cacna1a PE=1 SV=2	3	21.795	3.27939		1.20108	0.93115		-2.7325		0.00144764
sp|Q9CQL4|RM20_MOUSE	Mrpl20	39S ribosomal protein L20, mitochondrial OS=Mus musculus GN=Mrpl20 PE=1 SV=1	5	16.9377	5.10713		0.48331	0.142014		-1.72965		0.00144851
sp|Q9D7S7-2|RL22L_MOUSE	Rpl22l1	Isoform 2 of 60S ribosomal protein L22-like 1 OS=Mus musculus GN=Rpl22l1	4	2.02344	25.693		0.595502	1.84685		3.6665		0.00145863
sp|Q9DB40|MED27_MOUSE	Med27	Mediator of RNA polymerase II transcription subunit 27 OS=Mus musculus GN=Med27 PE=2 SV=2	7	16.5568	6.47637		0.438765	0.675159		-1.35416		0.00145972
sp|O54864-2|SUV91_MOUSE	Suv39h1	Isoform 2 of Histone-lysine N-methyltransferase SUV39H1 OS=Mus musculus GN=Suv39h1	4	20.1946	4.92046		1.05062	0.6144		-2.0371		0.00146565
sp|Q91WT8-2|RBM47_MOUSE	Rbm47	Isoform 2 of RNA-binding protein 47 OS=Mus musculus GN=Rbm47	2	11.6422	3.8624		0.171137	0.513751		-1.59179		0.00146772
sp|Q9EP69|SAC1_MOUSE	Sacm1l	Phosphatidylinositide phosphatase SAC1 OS=Mus musculus GN=Sacm1l PE=2 SV=1	34	11.2384	14.6251		0.227777	0.0941508		0.380007		0.00147198
sp|Q9EPA7|NMNA1_MOUSE	Nmnat1	Nicotinamide mononucleotide adenylyltransferase 1 OS=Mus musculus GN=Nmnat1 PE=1 SV=2	3	16.7459	4.0981		0.502212	0.441553		-2.03078		0.00147267
sp|Q8BX80|ENASE_MOUSE	Engase	Cytosolic endo-beta-N-acetylglucosaminidase OS=Mus musculus GN=Engase PE=2 SV=1	1	5.91029	20.3838		0.772675	0.899971		1.78613		0.00147482
sp|P02340|P53_MOUSE	Tp53	Cellular tumor antigen p53 OS=Mus musculus GN=Tp53 PE=1 SV=3	17	21.7795	0.796511		0.851227	0.105844		-4.77313		0.0014773
sp|Q69ZN6-2|GNPTA_MOUSE	Gnptab	Isoform 2 of N-acetylglucosamine-1-phosphotransferase subunits alpha/beta OS=Mus musculus GN=Gnptab	4	8.44949	18.5996		0.725047	0.446165		1.13833		0.00148676
sp|Q8BYH3|TRM13_MOUSE	Ccdc76	tRNA guanosine-2'-O-methyltransferase TRM13 homolog OS=Mus musculus GN=Ccdc76 PE=2 SV=1	2	8.43117	2.387		0.39524	0.347938		-1.82053		0.00148894
sp|Q91YI4-2|ARRB2_MOUSE	Arrb2	Isoform 2 of Beta-arrestin-2 OS=Mus musculus GN=Arrb2	4	17.904	6.18183		0.582753	0.762909		-1.53417		0.00148945
sp|Q80UY1|CI041_MOUSE		UPF0586 protein C9orf41 homolog OS=Mus musculus PE=2 SV=1	6	15.5986	9.43415		0.141525	0.491367		-0.725452		0.00149139
sp|Q8BG30|NELFA_MOUSE	Whsc2	Negative elongation factor A OS=Mus musculus GN=Whsc2 PE=1 SV=1	11	13.7383	10.908		0.123805	0.202128		-0.332825		0.00149492
sp|Q62447|CCNC_MOUSE	Ccnc	Cyclin-C OS=Mus musculus GN=Ccnc PE=2 SV=3	2	16.7153	6.47093		0.331446	0.766098		-1.36912		0.00149752
sp|Q8K2C8|GPAT4_MOUSE	Agpat6	Glycerol-3-phosphate acyltransferase 4 OS=Mus musculus GN=Agpat6 PE=2 SV=1	7	16.7831	9.88418		0.3302	0.34809		-0.763819		0.00149846
sp|P63087-2|PP1G_MOUSE	Ppp1cc	Isoform Gamma-2 of Serine/threonine-protein phosphatase PP1-gamma catalytic subunit OS=Mus musculus GN=Ppp1cc	8	16.088	7.13057		0.592511	0.503758		-1.1739		0.00149857
sp|Q8BPM2|M4K5_MOUSE	Map4k5	Mitogen-activated protein kinase kinase kinase kinase 5 OS=Mus musculus GN=Map4k5 PE=2 SV=2	20	7.73675	15.3422		0.407388	0.526041		0.987706		0.00149881
sp|Q8BGY9|SC5A7_MOUSE	Slc5a7	High affinity choline transporter 1 OS=Mus musculus GN=Slc5a7 PE=1 SV=1	1	32.4468	0.190064		2.6804	0.200164		-7.41545		0.00150038
sp|Q9WUM4|COR1C_MOUSE	Coro1c	Coronin-1C OS=Mus musculus GN=Coro1c PE=1 SV=2	23	15.7794	7.33264		0.285137	0.54456		-1.10564		0.00150172
sp|Q91VN6|DDX41_MOUSE	Ddx41	Probable ATP-dependent RNA helicase DDX41 OS=Mus musculus GN=Ddx41 PE=1 SV=2	13	15.1886	9.55958		0.280119	0.11894		-0.667967		0.00150221
sp|P61327|MGN_MOUSE	Magoh	Protein mago nashi homolog OS=Mus musculus GN=Magoh PE=2 SV=1	12	17.7742	6.766		0.926787	0.246307		-1.39341		0.00150333
sp|Q9WUJ8|ORC6_MOUSE	Orc6	Origin recognition complex subunit 6 OS=Mus musculus GN=Orc6 PE=1 SV=1	2	20.6493	4.72119		1.20298	0.502958		-2.12887		0.00150587
tr|Q8CIH9|Q8CIH9_MOUSE	Ppat	Amidophosphoribosyltransferase OS=Mus musculus GN=Ppat PE=2 SV=1	22	15.6356	6.49043		0.367318	0.714132		-1.26845		0.00150657
sp|Q80UU2|RPP38_MOUSE	Rpp38	Ribonuclease P protein subunit p38 OS=Mus musculus GN=Rpp38 PE=2 SV=1	5	14.8011	6.646		0.542625	0.414447		-1.15514		0.00151114
sp|Q8BGR2|LRC8D_MOUSE	Lrrc8d	Leucine-rich repeat-containing protein 8D OS=Mus musculus GN=Lrrc8d PE=2 SV=1	4	19.0324	1.22507		1.52679	0.23934		-3.95752		0.00151134
sp|P58064|RT06_MOUSE	Mrps6	28S ribosomal protein S6, mitochondrial OS=Mus musculus GN=Mrps6 PE=2 SV=3	8	15.9386	5.95345		0.749005	0.301537		-1.42073		0.00151174
sp|Q61193|RGL2_MOUSE	Rgl2	Ral guanine nucleotide dissociation stimulator-like 2 OS=Mus musculus GN=Rgl2 PE=1 SV=2	2	10.4564	17.018		0.39398	0.360783		0.702673		0.00151234
sp|Q9Z223-1|MOC2B_MOUSE	Mocs2	Isoform 2 of Molybdopterin synthase catalytic subunit OS=Mus musculus GN=Mocs2	1	19.4302	5.7906		0.769334	0.892785		-1.74652		0.0015161
sp|Q9CQF0|RM11_MOUSE	Mrpl11	39S ribosomal protein L11, mitochondrial OS=Mus musculus GN=Mrpl11 PE=2 SV=1	5	16.3618	7.12088		0.394368	0.697264		-1.2002		0.00151994
sp|Q9CRA8|EXOS5_MOUSE	Exosc5	Exosome complex component RRP46 OS=Mus musculus GN=Exosc5 PE=1 SV=1	6	14.7838	8.79063		0.494079	0.188533		-0.749982		0.00152097
sp|Q3TJD7|PDLI7_MOUSE	Pdlim7	PDZ and LIM domain protein 7 OS=Mus musculus GN=Pdlim7 PE=2 SV=1	31	13.8051	8.71648		0.211573	0.437419		-0.663384		0.0015232
sp|Q61072|ADAM9_MOUSE	Adam9	Disintegrin and metalloproteinase domain-containing protein 9 OS=Mus musculus GN=Adam9 PE=1 SV=2	15	8.39067	17.2671		0.398105	0.753362		1.04117		0.00152325
sp|Q8VEB2|SAV1_MOUSE	Sav1	Protein salvador homolog 1 OS=Mus musculus GN=Sav1 PE=1 SV=2	5	7.31644	19.6379		0.266307	0.806891		1.42443		0.0015233
sp|Q9Z2D3|DFNA5_MOUSE	Dfna5	Non-syndromic hearing impairment protein 5 homolog OS=Mus musculus GN=Dfna5 PE=2 SV=1	5	17.8829	2.97661		1.34453	0.476683		-2.58684		0.00152592
tr|D3Z4Z0|D3Z4Z0_MOUSE	Tada2b	MCG49644 OS=Mus musculus GN=Tada2b PE=4 SV=1	2	16.48	8.94951		0.121626	0.508637		-0.880839		0.00152735
sp|Q9EQW7|KI13A_MOUSE	Kif13a	Kinesin-like protein KIF13A OS=Mus musculus GN=Kif13a PE=1 SV=1	3	8.95569	18.8475		0.245703	0.817983		1.0735		0.00152768
sp|Q6PGB6-2|NAA50_MOUSE	Naa50	Isoform 2 of N-alpha-acetyltransferase 50, NatE catalytic subunit OS=Mus musculus GN=Naa50	12	15.4796	7.11949		0.437342	0.608135		-1.12052		0.00152807
sp|Q99K74|MED24_MOUSE	Med24	Mediator of RNA polymerase II transcription subunit 24 OS=Mus musculus GN=Med24 PE=1 SV=1	9	15.5758	7.79088		0.618583	0.411091		-0.999445		0.00152883
sp|Q06180-2|PTN2_MOUSE	Ptpn2	Isoform PTPA of Tyrosine-protein phosphatase non-receptor type 2 OS=Mus musculus GN=Ptpn2	11	14.0477	7.34032		0.51866	0.25445		-0.936419		0.00152895
sp|Q61387|COX7R_MOUSE	Cox7a2l	Cytochrome c oxidase subunit 7A-related protein, mitochondrial OS=Mus musculus GN=Cox7a2l PE=2 SV=1	3	11.547	3.23334		0.630378	0.245429		-1.83642		0.00152904
sp|Q80TZ9|RERE_MOUSE	Rere	Arginine-glutamic acid dipeptide repeats protein OS=Mus musculus GN=Rere PE=1 SV=3	4	17.3365	5.98549		1.02183	0.352934		-1.53427		0.00152912
sp|P97480-2|EYA3_MOUSE	Eya3	Isoform 2 of Eyes absent homolog 3 OS=Mus musculus GN=Eya3	4	16.6503	8.35054		0.678834	0.218402		-0.99561		0.00153029
sp|Q9CSU0-2|RPR1B_MOUSE	Rprd1b	Isoform 2 of Regulation of nuclear pre-mRNA domain-containing protein 1B OS=Mus musculus GN=Rprd1b	1	16.4313	7.70861		0.552841	0.616272		-1.0919		0.00153042
sp|Q8R0S2-2|IQEC1_MOUSE	Iqsec1	Isoform 2 of IQ motif and SEC7 domain-containing protein 1 OS=Mus musculus GN=Iqsec1	14	9.21081	18.3428		0.696487	0.423018		0.993811		0.00153134
sp|Q8CHH9-2|SEPT8_MOUSE	2014-09-08	Isoform 2 of Septin-8 OS=Mus musculus GN=Sept8	16	7.75155	18.2169		0.353642	0.939865		1.23272		0.00153136
sp|Q66JT1|LRC8E_MOUSE	Lrrc8e	Leucine-rich repeat-containing protein 8E OS=Mus musculus GN=Lrrc8e PE=2 SV=2	3	16.6875	4.75996		0.672716	0.913717		-1.80975		0.00153304
sp|Q3THK7|GUAA_MOUSE	Gmps	GMP synthase [glutamine-hydrolyzing] OS=Mus musculus GN=Gmps PE=1 SV=2	45	17.8262	6.57279		0.81703	0.588561		-1.43942		0.00153388
tr|E9Q6C7|E9Q6C7_MOUSE	Lphn2	Uncharacterized protein OS=Mus musculus GN=Lphn2 PE=3 SV=1	14	6.58934	17.5713		0.703749	0.270534		1.41502		0.00153589
sp|Q9D0I8|MRT4_MOUSE	Mrto4	mRNA turnover protein 4 homolog OS=Mus musculus GN=Mrto4 PE=2 SV=1	17	16.9047	5.04561		0.741768	0.32241		-1.74432		0.00153642
sp|Q8R5A3|AB1IP_MOUSE	Apbb1ip	Amyloid beta A4 precursor protein-binding family B member 1-interacting protein OS=Mus musculus GN=Apbb1ip PE=1 SV=2	11	12.0516	4.17259		0.138203	0.688495		-1.53021		0.00153824
sp|Q9WV95|PHLA3_MOUSE	Phlda3	Pleckstrin homology-like domain family A member 3 OS=Mus musculus GN=Phlda3 PE=1 SV=1	3	3.85195	26.5246		0.200482	2.18038		2.78367		0.00153881
sp|Q7TPD0|INT3_MOUSE	Ints3	Integrator complex subunit 3 OS=Mus musculus GN=Ints3 PE=1 SV=2	14	14.4169	9.10198		0.316556	0.350987		-0.663506		0.00153921
sp|Q62377|U2AFM_MOUSE	Zrsr2	U2 small nuclear ribonucleoprotein auxiliary factor 35 kDa subunit-related protein 2 OS=Mus musculus GN=Zrsr2 PE=2 SV=1	2	16.7637	6.22365		0.524298	0.851729		-1.42951		0.00154014
sp|Q80X85|RT07_MOUSE	Mrps7	28S ribosomal protein S7, mitochondrial OS=Mus musculus GN=Mrps7 PE=2 SV=1	5	15.8614	5.76762		0.927527	0.162154		-1.45948		0.00154058
sp|Q80WR5|CA174_MOUSE		UPF0688 protein C1orf174 homolog OS=Mus musculus PE=1 SV=1	2	19.7393	7.89234		0.973915	0.548998		-1.32255		0.00154059
sp|Q922R8|PDIA6_MOUSE	Pdia6	Protein disulfide-isomerase A6 OS=Mus musculus GN=Pdia6 PE=1 SV=3	27	8.49892	18.9241		0.672864	0.720551		1.15487		0.00154184
sp|Q9JKK8|ATR_MOUSE	Atr	Serine/threonine-protein kinase ATR OS=Mus musculus GN=Atr PE=1 SV=2	11	14.4907	9.56329		0.0948004	0.412353		-0.599545		0.00154345
sp|Q8QZV7|M89BB_MOUSE		Cell cycle regulator Mat89Bb homolog OS=Mus musculus PE=2 SV=2	15	15.776	9.22446		0.433281	0.433182		-0.774193		0.00154383
sp|Q8R3Y8-2|I2BP1_MOUSE	Irf2bp1	Isoform 2 of Interferon regulatory factor 2-binding protein 1 OS=Mus musculus GN=Irf2bp1	8	16.1099	8.3767		0.402338	0.61265		-0.943494		0.00154422
sp|Q8BI06|K1199_MOUSE		Protein KIAA1199 homolog OS=Mus musculus PE=2 SV=4	13	3.17274	29.3667		1.50061	2.04542		3.21038		0.00154569
sp|P35822|PTPRK_MOUSE	Ptprk	Receptor-type tyrosine-protein phosphatase kappa OS=Mus musculus GN=Ptprk PE=1 SV=1	15	21.2197	7.39806		1.06611	0.515556		-1.52019		0.00154671
sp|Q6P6L0-3|FIL1L_MOUSE	Filip1l	Isoform 3 of Filamin A-interacting protein 1-like OS=Mus musculus GN=Filip1l	22	23.9687	1.13191		1.06432	0.554266		-4.40432		0.00154731
sp|Q9DBJ3|BI2L1_MOUSE	Baiap2l1	Brain-specific angiogenesis inhibitor 1-associated protein 2-like protein 1 OS=Mus musculus GN=Baiap2l1 PE=1 SV=1	14	8.62665	21.6207		0.291124	1.22026		1.32554		0.00154752
sp|Q8BHC1|RB39B_MOUSE	Rab39b	Ras-related protein Rab-39B OS=Mus musculus GN=Rab39b PE=2 SV=1	4	13.9714	5.98613		0.655741	0.270896		-1.22278		0.00154834
sp|Q6ZPR5|NSMA3_MOUSE	Smpd4	Sphingomyelin phosphodiesterase 4 OS=Mus musculus GN=Smpd4 PE=2 SV=2	15	16.7871	7.48834		0.290934	0.827456		-1.16463		0.00154932
sp|Q9WTP6-2|KAD2_MOUSE	Ak2	Isoform 2 of Adenylate kinase 2, mitochondrial OS=Mus musculus GN=Ak2	24	18.1904	4.82171		0.84892	0.301932		-1.91556		0.00154934
sp|Q9WV30|NFAT5_MOUSE	Nfat5	Nuclear factor of activated T-cells 5 OS=Mus musculus GN=Nfat5 PE=2 SV=1	14	20.3786	5.57293		1.26861	0.675945		-1.87055		0.00155039
tr|Q8K354|Q8K354_MOUSE	Cbr3	Carbonyl reductase 3 OS=Mus musculus GN=Cbr3 PE=2 SV=1	8	5.98179	20.4374		0.174173	1.22016		1.77256		0.00155126
sp|Q62415|ASPP1_MOUSE	Ppp1r13b	Apoptosis-stimulating of p53 protein 1 OS=Mus musculus GN=Ppp1r13b PE=1 SV=2	6	9.62668	15.8532		0.563313	0.141048		0.719663		0.00155129
sp|Q8BQM4|HEAT3_MOUSE	Heatr3	HEAT repeat-containing protein 3 OS=Mus musculus GN=Heatr3 PE=2 SV=1	20	15.6816	9.04704		0.544958	0.146256		-0.793555		0.00155308
sp|Q03141-2|MARK3_MOUSE	Mark3	Isoform 2 of MAP/microtubule affinity-regulating kinase 3 OS=Mus musculus GN=Mark3	11	9.11296	15.0249		0.269678	0.281847		0.72136		0.00155734
sp|Q69ZH9|RHG23_MOUSE	Arhgap23	Rho GTPase-activating protein 23 OS=Mus musculus GN=Arhgap23 PE=1 SV=2	6	9.473	17.1584		0.277134	0.596661		0.857019		0.00155833
tr|D3YVW2|D3YVW2_MOUSE	Golim4	Uncharacterized protein OS=Mus musculus GN=Golim4 PE=4 SV=1	19	8.96462	17.1558		0.450918	0.592216		0.936385		0.00155911
sp|Q9D868-2|PPIH_MOUSE	Ppih	Isoform 2 of Peptidyl-prolyl cis-trans isomerase H OS=Mus musculus GN=Ppih	10	18.7905	5.64697		0.713102	1.01384		-1.73445		0.00155973
sp|Q7TSY8|SGOL2_MOUSE	Sgol2	Shugoshin-like 2 OS=Mus musculus GN=Sgol2 PE=1 SV=1	8	14.8437	9.87867		0.441994	0.0863814		-0.587458		0.00156165
sp|Q2MV57-2|TECT2_MOUSE	Tctn2	Isoform 2 of Tectonic-2 OS=Mus musculus GN=Tctn2	1	8.4649	19.4548		0.839717	0.670331		1.20056		0.00156239
sp|Q9QZH3|PPIE_MOUSE	Ppie	Peptidyl-prolyl cis-trans isomerase E OS=Mus musculus GN=Ppie PE=2 SV=2	9	15.9439	8.57169		0.109764	0.709965		-0.895354		0.00156272
sp|Q9R117|TYK2_MOUSE	Tyk2	Non-receptor tyrosine-protein kinase TYK2 OS=Mus musculus GN=Tyk2 PE=1 SV=2	3	10.1227	16.3099		0.410984	0.40495		0.688153		0.0015629
sp|Q7TQK1|INT7_MOUSE	Ints7	Integrator complex subunit 7 OS=Mus musculus GN=Ints7 PE=1 SV=1	14	14.8392	9.37738		0.13686	0.495851		-0.662156		0.00156334
sp|Q91YM2|RHG35_MOUSE	Arhgap35	Rho GTPase-activating protein 35 OS=Mus musculus GN=Arhgap35 PE=1 SV=3	21	9.52444	15.5095		0.135578	0.377791		0.703446		0.00156373
sp|Q9Z280-2|PLD1_MOUSE	Pld1	Isoform PLD1B of Phospholipase D1 OS=Mus musculus GN=Pld1	5	7.57281	17.8193		0.391147	0.558761		1.23454		0.00156399
sp|Q3UH68-2|LIMC1_MOUSE	Limch1	Isoform 2 of LIM and calponin homology domains-containing protein 1 OS=Mus musculus GN=Limch1	5	3.35204	15.7694		0.210453	1.14828		2.23402		0.00156439
sp|Q62470-2|ITA3_MOUSE	Itga3	Isoform Alpha-3B of Integrin alpha-3 OS=Mus musculus GN=Itga3	13	22.7687	9.87854		1.01118	0.584418		-1.20468		0.00156864
sp|P16546-2|SPTA2_MOUSE	Sptan1	Isoform 2 of Spectrin alpha chain, brain OS=Mus musculus GN=Sptan1	243	7.75742	18.6523		0.296689	0.392385		1.2657		0.00156913
sp|Q8VI33|TAF9_MOUSE	Taf9	Transcription initiation factor TFIID subunit 9 OS=Mus musculus GN=Taf9 PE=2 SV=1	7	16.9367	7.15507		0.471956	0.83138		-1.24312		0.00157057
sp|Q00915|RET1_MOUSE	Rbp1	Retinol-binding protein 1 OS=Mus musculus GN=Rbp1 PE=2 SV=2	8	7.91393	1.0521		0.607666	0.198941		-2.91112		0.00157073
sp|P97927|LAMA4_MOUSE	Lama4	Laminin subunit alpha-4 OS=Mus musculus GN=Lama4 PE=1 SV=2	3	2.86232	18.811		0.803404	1.36544		2.71632		0.00157085
sp|Q3TX08|TRM1_MOUSE	Trmt1	N(2),N(2)-dimethylguanosine tRNA methyltransferase OS=Mus musculus GN=Trmt1 PE=1 SV=2	6	13.9301	7.16132		0.663003	0.107385		-0.959911		0.00157381
sp|Q9JHU4|DYHC1_MOUSE	Dync1h1	Cytoplasmic dynein 1 heavy chain 1 OS=Mus musculus GN=Dync1h1 PE=1 SV=2	322	9.20128	16.916		0.710071	0.0953667		0.878485		0.00157498
sp|Q8BTI7|ANR52_MOUSE	Ankrd52	Serine/threonine-protein phosphatase 6 regulatory ankyrin repeat subunit C OS=Mus musculus GN=Ankrd52 PE=2 SV=1	10	14.1171	9.39524		0.279935	0.158969		-0.587438		0.00157691
sp|Q9CWV0|CG030_MOUSE		Uncharacterized protein C7orf30 homolog OS=Mus musculus PE=2 SV=1	2	16.4791	5.31317		0.799308	0.618716		-1.63299		0.00157723
sp|Q80WW9|DDRGK_MOUSE	Ddrgk1	DDRGK domain-containing protein 1 OS=Mus musculus GN=Ddrgk1 PE=1 SV=2	4	9.71216	16.8639		0.457486	0.541586		0.796074		0.00157762
sp|Q62083|PICK1_MOUSE	Pick1	PRKCA-binding protein OS=Mus musculus GN=Pick1 PE=1 SV=2	2	16.345	9.03193		0.22132	0.697633		-0.855744		0.00157879
sp|P97315|CSRP1_MOUSE	Csrp1	Cysteine and glycine-rich protein 1 OS=Mus musculus GN=Csrp1 PE=1 SV=3	16	19.3434	3.95711		1.30451	0.578052		-2.28932		0.00157896
sp|Q8BWZ3|NAA25_MOUSE	Naa25	N-alpha-acetyltransferase 25, NatB auxiliary subunit OS=Mus musculus GN=Naa25 PE=1 SV=1	29	13.8042	7.15196		0.507487	0.355392		-0.948697		0.00158018
sp|P63154|CRNL1_MOUSE	Crnkl1	Crooked neck-like protein 1 OS=Mus musculus GN=Crnkl1 PE=2 SV=1	15	16.4368	7.69923		0.79867	0.366337		-1.09414		0.00158041
sp|B1AVH7|TBD2A_MOUSE	Tbc1d2	TBC1 domain family member 2A OS=Mus musculus GN=Tbc1d2 PE=2 SV=1	1	6.44458	24.8745		1.14142	1.44292		1.94851		0.00158218
sp|Q6AZB0-3|BOC_MOUSE	Boc	Isoform 3 of Brother of CDO OS=Mus musculus GN=Boc	1	4.41471	26.4354		1.10713	1.8955		2.58208		0.00158302
sp|Q62158|TRI27_MOUSE	Trim27	Zinc finger protein RFP OS=Mus musculus GN=Trim27 PE=1 SV=2	6	17.4528	8.37655		0.876466	0.200673		-1.05903		0.00158356
sp|Q9R1Z8|VINEX_MOUSE	Sorbs3	Vinexin OS=Mus musculus GN=Sorbs3 PE=1 SV=1	13	6.51207	19.5897		0.490129	1.21271		1.58891		0.00158452
sp|O70293-2|GRK6_MOUSE	Grk6	Isoform GRK6B of G protein-coupled receptor kinase 6 OS=Mus musculus GN=Grk6	8	15.851	6.93911		0.734374	0.376997		-1.19175		0.00158475
sp|Q91ZU6-3|DYST_MOUSE	Dst	Isoform 3 of Dystonin OS=Mus musculus GN=Dst	12	13.1102	6.39307		0.354062	0.501952		-1.03611		0.00158478
sp|Q8VC66|ADIP_MOUSE	Ssx2ip	Afadin- and alpha-actinin-binding protein OS=Mus musculus GN=Ssx2ip PE=1 SV=1	1	15.4844	7.1711		0.666309	0.503858		-1.11055		0.00158503
sp|P16460|ASSY_MOUSE	Ass1	Argininosuccinate synthase OS=Mus musculus GN=Ass1 PE=1 SV=1	15	3.16843	28.7214		0.822502	2.19305		3.18029		0.00158573
sp|Q80SY5|PR38B_MOUSE	Prpf38b	Pre-mRNA-splicing factor 38B OS=Mus musculus GN=Prpf38b PE=1 SV=1	10	17.0952	7.36614		0.146028	0.965287		-1.21461		0.00158578
sp|O88667|RAD_MOUSE	Rrad	GTP-binding protein RAD OS=Mus musculus GN=Rrad PE=1 SV=1	2	21.2199	3.14842		1.19673	1.37348		-2.75272		0.00158607
sp|Q9Z120|TRMB_MOUSE	Mettl1	tRNA (guanine-N(7)-)-methyltransferase OS=Mus musculus GN=Mettl1 PE=2 SV=1	2	17.9393	5.32139		0.624046	1.08137		-1.75325		0.00158617
tr|A2A7F4|A2A7F4_MOUSE	Rlf	MCG122876 OS=Mus musculus GN=Rlf PE=4 SV=1	7	17.7979	6.19207		1.12193	0.229091		-1.52321		0.00158847
sp|Q9DCT5|SDF2_MOUSE	Sdf2	Stromal cell-derived factor 2 OS=Mus musculus GN=Sdf2 PE=2 SV=1	9	9.7448	16.7992		0.642106	0.27178		0.785688		0.00158943
sp|Q99J08|S14L2_MOUSE	Sec14l2	SEC14-like protein 2 OS=Mus musculus GN=Sec14l2 PE=2 SV=1	2	11.513	18.2648		0.342992	0.569982		0.665795		0.00158997
sp|Q64364|CD2A2_MOUSE	Cdkn2a	Cyclin-dependent kinase inhibitor 2A, isoform 3 OS=Mus musculus GN=Cdkn2a PE=1 SV=1	6	16.3359	1.47264		1.49232	0.166773		-3.47157		0.00159054
tr|Q4VBF6|Q4VBF6_MOUSE	Bcl2	B-cell leukemia/lymphoma 2, isoform CRA_b OS=Mus musculus GN=Bcl2 PE=2 SV=1	1	19.3601	4.8125		0.855542	1.22405		-2.00823		0.00159138
sp|Q8R323|RFC3_MOUSE	Rfc3	Replication factor C subunit 3 OS=Mus musculus GN=Rfc3 PE=2 SV=1	7	16.5072	5.75148		0.680391	0.871808		-1.52109		0.00159254
tr|E9Q7X6|E9Q7X6_MOUSE	Heg1	Uncharacterized protein OS=Mus musculus GN=Heg1 PE=4 SV=1	3	7.32244	23.582		0.594069	1.37571		1.68729		0.00159281
sp|Q8R1J3|ZCHC9_MOUSE	Zcchc9	Zinc finger CCHC domain-containing protein 9 OS=Mus musculus GN=Zcchc9 PE=2 SV=1	4	17.1169	6.6909		0.614524	0.866004		-1.35515		0.00159541
sp|P62482|KCAB2_MOUSE	Kcnab2	Voltage-gated potassium channel subunit beta-2 OS=Mus musculus GN=Kcnab2 PE=1 SV=1	2	25.4612	5.15052		1.54943	1.06648		-2.30551		0.00159675
tr|A0S860|A0S860_MOUSE	Zfyve9	Uncharacterized protein OS=Mus musculus GN=Zfyve9 PE=2 SV=1	4	15.6287	10.4418		0.443825	0.252873		-0.581829		0.00159742
sp|A2AF47|DOC11_MOUSE	Dock11	Dedicator of cytokinesis protein 11 OS=Mus musculus GN=Dock11 PE=1 SV=1	28	19.154	3.34257		0.80753	0.658093		-2.51862		0.00159807
sp|Q9CPN8|IF2B3_MOUSE	Igf2bp3	Insulin-like growth factor 2 mRNA-binding protein 3 OS=Mus musculus GN=Igf2bp3 PE=1 SV=1	27	14.5405	5.94362		0.283047	0.834293		-1.29067		0.00159816
tr|D3YWZ2|D3YWZ2_MOUSE	Vill	Uncharacterized protein OS=Mus musculus GN=Vill PE=4 SV=1	2	4.19187	26.5951		1.01823	2.06143		2.6655		0.00159843
sp|Q9D8V0-4|HM13_MOUSE	Hm13	Isoform 4 of Minor histocompatibility antigen H13 OS=Mus musculus GN=Hm13	8	7.71229	17.6517		0.54619	0.733951		1.19458		0.00159846
sp|P27612|PLAP_MOUSE	Plaa	Phospholipase A-2-activating protein OS=Mus musculus GN=Plaa PE=2 SV=4	35	16.3869	8.87771		0.0920656	0.281552		-0.884286		0.00160154
sp|P97411-2|ICA69_MOUSE	Ica1	Isoform 2 of Islet cell autoantigen 1 OS=Mus musculus GN=Ica1	5	17.8253	8.4762		0.550503	0.253624		-1.07243		0.00160221
sp|Q9CPX7|RT16_MOUSE	Mrps16	28S ribosomal protein S16, mitochondrial OS=Mus musculus GN=Mrps16 PE=2 SV=1	4	15.5539	6.69129		0.225391	0.788205		-1.21692		0.00160262
tr|Q3TJB1|Q3TJB1_MOUSE	Zmym1	Uncharacterized protein OS=Mus musculus GN=Zmym1 PE=2 SV=1	3	20.2895	5.93591		0.829624	1.19553		-1.77319		0.00160323
sp|P81117|NUCB2_MOUSE	Nucb2	Nucleobindin-2 OS=Mus musculus GN=Nucb2 PE=1 SV=2	20	8.38538	20.0204		1.07074	0.507531		1.25552		0.00160408
sp|Q8VCY6|UTP6_MOUSE	Utp6	U3 small nucleolar RNA-associated protein 6 homolog OS=Mus musculus GN=Utp6 PE=1 SV=1	16	15.9891	5.53599		0.656866	0.14254		-1.53017		0.00160607
sp|Q62351|TFR1_MOUSE	Tfrc	Transferrin receptor protein 1 OS=Mus musculus GN=Tfrc PE=1 SV=1	39	20.2479	3.97076		1.01637	1.3224		-2.35028		0.00160638
sp|P08551|NFL_MOUSE	Nefl	Neurofilament light polypeptide OS=Mus musculus GN=Nefl PE=1 SV=5	10	8.50785	17.627		0.798332	0.470033		1.05092		0.00160696
sp|Q8BR63|F177A_MOUSE	Fam177a1	Protein FAM177A1 OS=Mus musculus GN=Fam177a1 PE=2 SV=1	7	7.24955	18.09		0.496122	0.480903		1.31923		0.0016081
sp|Q9CQ36|DPOE4_MOUSE	Pole4	DNA polymerase epsilon subunit 4 OS=Mus musculus GN=Pole4 PE=2 SV=1	1	19.2512	4.98674		0.978872	1.0834		-1.94878		0.00160888
sp|Q148V7|K1468_MOUSE	Kiaa1468	LisH domain and HEAT repeat-containing protein KIAA1468 OS=Mus musculus GN=Kiaa1468 PE=1 SV=1	11	8.6402	17.6187		0.375177	0.837574		1.02797		0.00160913
sp|P15327|PMGE_MOUSE	Bpgm	Bisphosphoglycerate mutase OS=Mus musculus GN=Bpgm PE=2 SV=2	4	18.0143	6.10257		1.08908	0.533714		-1.56166		0.0016118
sp|Q9QYR6-2|MAP1A_MOUSE	Map1a	Isoform 2 of Microtubule-associated protein 1A OS=Mus musculus GN=Map1a	61	6.25386	19.8154		0.339394	0.790008		1.6638		0.00163521
sp|Q3USJ8-2|FCSD2_MOUSE	Fchsd2	Isoform 2 of FCH and double SH3 domains protein 2 OS=Mus musculus GN=Fchsd2	6	6.34004	21.3355		0.511118	1.46806		1.75069		0.00163594
sp|Q9R1S3-2|PIGN_MOUSE	Pign	Isoform 2 of GPI ethanolamine phosphate transferase 1 OS=Mus musculus GN=Pign	2	6.39789	19.3736		0.498417	0.460411		1.59843		0.00164411
sp|Q61730|IL1AP_MOUSE	Il1rap	Interleukin-1 receptor accessory protein OS=Mus musculus GN=Il1rap PE=1 SV=1	4	9.71389	17.1968		0.679545	0.379022		0.824022		0.00164695
sp|Q62261|SPTB2_MOUSE	Sptbn1	Spectrin beta chain, brain 1 OS=Mus musculus GN=Sptbn1 PE=1 SV=2	200	7.39124	19.2572		0.360713	0.693371		1.38151		0.00164972
sp|P32233|DRG1_MOUSE	Drg1	Developmentally-regulated GTP-binding protein 1 OS=Mus musculus GN=Drg1 PE=1 SV=1	20	14.6307	8.47562		0.203878	0.221002		-0.787604		0.00167093
tr|E9QPY6|E9QPY6_MOUSE	Msh3	Uncharacterized protein OS=Mus musculus GN=Msh3 PE=3 SV=1	6	20.8734	4.51838		0.358333	0.689417		-2.20779		0.00168181
sp|Q8R127|SCPDH_MOUSE	Sccpdh	Probable saccharopine dehydrogenase OS=Mus musculus GN=Sccpdh PE=2 SV=1	9	10.278	17.6558		0.387148	0.261747		0.780583		0.00169429
sp|Q6PE54|DHX40_MOUSE	Dhx40	Probable ATP-dependent RNA helicase DHX40 OS=Mus musculus GN=Dhx40 PE=2 SV=1	2	17.7596	7.40298		0.398682	0.514162		-1.26242		0.00170781
sp|Q9QYB5-2|ADDG_MOUSE	Add3	Isoform 1 of Gamma-adducin OS=Mus musculus GN=Add3	18	8.09646	22.3285		0.715807	1.31354		1.46352		0.00170929
sp|Q7TT50|MRCKB_MOUSE	Cdc42bpb	Serine/threonine-protein kinase MRCK beta OS=Mus musculus GN=Cdc42bpb PE=1 SV=2	37	8.61754	17.3767		0.249174	0.379066		1.01181		0.00172578
tr|A2A7S7|A2A7S7_MOUSE	Yars	Tyrosyl-tRNA synthetase OS=Mus musculus GN=Yars PE=4 SV=1	49	16.0209	7.22415		0.150672	0.919056		-1.14905		0.00173073
sp|Q9WTX8|MD1L1_MOUSE	Mad1l1	Mitotic spindle assembly checkpoint protein MAD1 OS=Mus musculus GN=Mad1l1 PE=2 SV=1	23	15.5509	8.46943		0.629571	0.405401		-0.876659		0.00173158
sp|Q9CQB5|CISD2_MOUSE	Cisd2	CDGSH iron-sulfur domain-containing protein 2 OS=Mus musculus GN=Cisd2 PE=1 SV=1	4	16.8899	6.07976		0.71906	0.886749		-1.47408		0.00173227
sp|Q9CQA5-2|MED4_MOUSE	Med4	Isoform 2 of Mediator of RNA polymerase II transcription subunit 4 OS=Mus musculus GN=Med4	4	14.6214	8.42736		0.531892	0.387435		-0.794926		0.00173604
sp|O09030|I13R1_MOUSE	Il13ra1	Interleukin-13 receptor subunit alpha-1 OS=Mus musculus GN=Il13ra1 PE=2 SV=1	1	20.8692	5.52712		1.16495	1.13957		-1.91677		0.00174408
sp|Q9QZA0|CAH5B_MOUSE	Ca5b	Carbonic anhydrase 5B, mitochondrial OS=Mus musculus GN=Ca5b PE=2 SV=2	5	20.0623	8.6202		0.622909	0.334564		-1.21869		0.00174479
tr|D3Z5I1|D3Z5I1_MOUSE	Zc3hav1	Uncharacterized protein OS=Mus musculus GN=Zc3hav1 PE=4 SV=1	26	12.6908	8.76381		0.0964514	0.408466		-0.534152		0.00174994
tr|E9Q238|E9Q238_MOUSE	Kank1	Uncharacterized protein OS=Mus musculus GN=Kank1 PE=4 SV=1	9	8.92812	19.0519		0.765525	0.790053		1.0935		0.00175061
sp|Q80T85|DCAF5_MOUSE	Dcaf5	DDB1- and CUL4-associated factor 5 OS=Mus musculus GN=Dcaf5 PE=1 SV=2	5	8.18953	16.9956		0.586233	0.733277		1.05331		0.00175093
tr|E9Q8D0|E9Q8D0_MOUSE	Dnajc21	Uncharacterized protein OS=Mus musculus GN=Dnajc21 PE=4 SV=1	6	13.0297	7.22809		0.162635	0.598121		-0.850113		0.00175671
sp|Q9D1D4|TMEDA_MOUSE	Tmed10	Transmembrane emp24 domain-containing protein 10 OS=Mus musculus GN=Tmed10 PE=2 SV=1	14	6.86046	20.2715		1.42766	0.291398		1.56308		0.0017581
sp|Q6GYP7-2|RGPA1_MOUSE	Ralgapa1	Isoform 2 of Ral GTPase-activating protein subunit alpha-1 OS=Mus musculus GN=Ralgapa1	4	8.52485	19.1488		0.752712	0.856277		1.16751		0.0017601
tr|B9EJX5|B9EJX5_MOUSE	Taf2	TAF2 RNA polymerase II, TATA box binding protein (TBP)-associated factor OS=Mus musculus GN=Taf2 PE=2 SV=1	12	14.4915	8.23422		0.552114	0.381683		-0.8155		0.00176629
sp|Q9CZQ6|RAE1E_MOUSE	Raet1e	Retinoic acid early-inducible protein 1-epsilon OS=Mus musculus GN=Raet1e PE=2 SV=1	3	7.03613	20.7749		0.586217	1.37273		1.56198		0.00176659
sp|P06537-2|GCR_MOUSE	Nr3c1	Isoform 2 of Glucocorticoid receptor OS=Mus musculus GN=Nr3c1	11	8.33197	15.6112		0.267674	0.369569		0.905848		0.00176707
sp|Q6P2B1|TNPO3_MOUSE	Tnpo3	Transportin-3 OS=Mus musculus GN=Tnpo3 PE=1 SV=1	16	15.3591	9.27656		0.583143	0.302231		-0.727428		0.00176773
sp|O08740|RPB11_MOUSE	Polr2j	DNA-directed RNA polymerase II subunit RPB11 OS=Mus musculus GN=Polr2j PE=2 SV=1	2	16.5044	6.57058		0.672025	0.841676		-1.32876		0.00176963
sp|Q9Z204|HNRPC_MOUSE	Hnrnpc	Heterogeneous nuclear ribonucleoproteins C1/C2 OS=Mus musculus GN=Hnrnpc PE=1 SV=1	2	17.1196	7.1752		0.568492	0.917968		-1.25456		0.00177086
sp|Q63943-2|MEF2D_MOUSE	Mef2d	Isoform Muscle of Myocyte-specific enhancer factor 2D OS=Mus musculus GN=Mef2d	2	17.4405	5.90058		0.876751	0.88444		-1.56351		0.00177239
sp|Q9D4G9|RMI1_MOUSE	Rmi1	RecQ-mediated genome instability protein 1 OS=Mus musculus GN=Rmi1 PE=2 SV=1	2	16.3823	7.9314		0.598273	0.685505		-1.04649		0.00177394
sp|P43346|DCK_MOUSE	Dck	Deoxycytidine kinase OS=Mus musculus GN=Dck PE=1 SV=1	7	18.9221	7.95913		0.991072	0.655739		-1.24939		0.00177686
sp|Q9JIK9|RT34_MOUSE	Mrps34	28S ribosomal protein S34, mitochondrial OS=Mus musculus GN=Mrps34 PE=2 SV=1	9	15.3059	6.66897		0.706412	0.60717		-1.19855		0.00177698
tr|E9PYI6|E9PYI6_MOUSE	4732471D19	Uncharacterized protein OS=Mus musculus GN=4732471D19Rik PE=4 SV=1	1	16.5518	8.41976		0.877901	0.077235		-0.97514		0.00178404
sp|Q9CQX4|PAF_MOUSE	Paf	PCNA-associated factor OS=Mus musculus GN=Paf PE=2 SV=1	5	19.7795	7.00351		1.30659	0.493725		-1.49786		0.00178445
sp|Q6PG16-2|HJURP_MOUSE	Hjurp	Isoform 2 of Holliday junction recognition protein OS=Mus musculus GN=Hjurp	5	18.9883	6.97084		0.629356	1.15624		-1.4457		0.00178976
sp|Q9CXF7-2|CHD1L_MOUSE	Chd1l	Isoform 2 of Chromodomain-helicase-DNA-binding protein 1-like OS=Mus musculus GN=Chd1l	8	17.7522	5.47799		0.297144	0.693538		-1.69628		0.00178997
sp|Q6P5H2|NEST_MOUSE	Nes	Nestin OS=Mus musculus GN=Nes PE=1 SV=1	72	19.6328	2.3708		0.807225	0.353624		-3.04982		0.00179309
sp|P52482|UB2E1_MOUSE	Ube2e1	Ubiquitin-conjugating enzyme E2 E1 OS=Mus musculus GN=Ube2e1 PE=1 SV=1	3	16.4062	9.82006		0.49668	0.525555		-0.740437		0.00179734
sp|Q6ZQL4|WDR43_MOUSE	Wdr43	WD repeat-containing protein 43 OS=Mus musculus GN=Wdr43 PE=1 SV=2	21	16.6187	6.42752		0.799756	0.791293		-1.37048		0.00181908
sp|Q8K0S9|SNPC1_MOUSE	Snapc1	snRNA-activating protein complex subunit 1 OS=Mus musculus GN=Snapc1 PE=2 SV=1	1	17.7198	7.66705		0.737355	0.831959		-1.20862		0.00182289
tr|Q8BVY4|Q8BVY4_MOUSE	Supt3h	Suppressor of Ty 3 homolog (S. cerevisiae) OS=Mus musculus GN=Supt3h PE=2 SV=1	2	16.7252	8.99941		0.349346	0.777442		-0.894124		0.00182296
sp|P97314|CSRP2_MOUSE	Csrp2	Cysteine and glycine-rich protein 2 OS=Mus musculus GN=Csrp2 PE=1 SV=3	13	8.91295	21.5677		0.850867	1.11826		1.2749		0.00183521
sp|Q921I9|EXOS4_MOUSE	Exosc4	Exosome complex component RRP41 OS=Mus musculus GN=Exosc4 PE=2 SV=3	5	14.5826	9.27736		0.377073	0.451882		-0.652458		0.00183715
sp|P97499|TEP1_MOUSE	Tep1	Telomerase protein component 1 OS=Mus musculus GN=Tep1 PE=1 SV=1	8	7.85176	17.9182		0.501819	0.356039		1.19034		0.00183742
sp|Q9D1M4|MCA3_MOUSE	Eef1e1	Eukaryotic translation elongation factor 1 epsilon-1 OS=Mus musculus GN=Eef1e1 PE=2 SV=1	12	16.2387	6.50819		1.07254	0.171641		-1.31911		0.00184791
sp|Q61102|ABCB7_MOUSE	Abcb7	ATP-binding cassette sub-family B member 7, mitochondrial OS=Mus musculus GN=Abcb7 PE=1 SV=3	12	14.7934	10.6075		0.46319	0.0535747		-0.479864		0.00184981
sp|Q9D125|RT25_MOUSE	Mrps25	28S ribosomal protein S25, mitochondrial OS=Mus musculus GN=Mrps25 PE=1 SV=1	4	13.9215	8.42646		0.509077	0.347869		-0.724316		0.00185201
sp|Q3UMQ8|NAF1_MOUSE	Naf1	H/ACA ribonucleoprotein complex non-core subunit NAF1 OS=Mus musculus GN=Naf1 PE=1 SV=2	3	17.614	6.27473		1.24498	0.225721		-1.48909		0.00185372
tr|Q78RX3|Q78RX3_MOUSE	BC003266	Uncharacterized protein OS=Mus musculus GN=BC003266 PE=2 SV=1	3	20.0249	5.31865		1.12994	1.20708		-1.91266		0.00185813
sp|Q80UU1|ANKZ1_MOUSE	Ankzf1	Ankyrin repeat and zinc finger domain-containing protein 1 OS=Mus musculus GN=Ankzf1 PE=2 SV=2	5	10.8046	13.7884		0.235424	0.238022		0.351809		0.00185996
sp|Q9CQV7|TIM14_MOUSE	Dnajc19	Mitochondrial import inner membrane translocase subunit TIM14 OS=Mus musculus GN=Dnajc19 PE=2 SV=3	3	16.4247	6.80309		1.01475	0.361992		-1.2716		0.00186224
sp|P18828-2|SDC1_MOUSE	Sdc1	Isoform 2 of Syndecan-1 OS=Mus musculus GN=Sdc1	4	6.05292	23.6845		1.38727	1.42079		1.96824		0.00186247
sp|P24788|CDK11_MOUSE	Cdk11	Cyclin-dependent kinase 11 OS=Mus musculus GN=Cdk11 PE=1 SV=2	23	16.8421	7.40642		0.538052	0.911644		-1.18522		0.00186778
sp|Q9D2G5-5|SYNJ2_MOUSE	Synj2	Isoform 5 of Synaptojanin-2 OS=Mus musculus GN=Synj2	2	20.86	1.65638		2.14623	0.299924		-3.65463		0.00186871
sp|Q9WV03|FA50A_MOUSE	Fam50a	Protein FAM50A OS=Mus musculus GN=Fam50a PE=2 SV=1	15	18.4048	7.72369		0.579974	1.06041		-1.25272		0.00187232
sp|Q9ERE7|MESD_MOUSE	Mesdc2	LDLR chaperone MESD OS=Mus musculus GN=Mesdc2 PE=1 SV=1	12	7.45929	19.0461		0.320995	1.27059		1.35238		0.00187711
sp|Q80V94|AP4E1_MOUSE	Ap4e1	AP-4 complex subunit epsilon-1 OS=Mus musculus GN=Ap4e1 PE=2 SV=3	7	8.11413	16.5615		0.0522386	0.96191		1.02932		0.00188057
tr|E9PZ26|E9PZ26_MOUSE	Brd1	Uncharacterized protein OS=Mus musculus GN=Brd1 PE=4 SV=1	4	15.7512	7.92506		0.529768	0.714645		-0.990966		0.00188098
sp|Q9Z206-2|ARHG8_MOUSE	Net1	Isoform 2 of Neuroepithelial cell-transforming gene 1 protein OS=Mus musculus GN=Net1	3	19.5344	6.96819		0.769299	1.20232		-1.48716		0.0018839
sp|Q3UMR0-2|ANR27_MOUSE	Ankrd27	Isoform 2 of Ankyrin repeat domain-containing protein 27 OS=Mus musculus GN=Ankrd27	3	8.06669	17.6034		0.841528	0.680649		1.1258		0.00188589
sp|Q8R3H9|TTC4_MOUSE	Ttc4	Tetratricopeptide repeat protein 4 OS=Mus musculus GN=Ttc4 PE=2 SV=1	9	16.355	8.27053		0.702522	0.596638		-0.983681		0.00188665
sp|Q5Y5T1-2|ZDH20_MOUSE	Zdhhc20	Isoform 2 of Probable palmitoyltransferase ZDHHC20 OS=Mus musculus GN=Zdhhc20	6	7.97721	19.219		0.485922	1.18529		1.26858		0.00189124
sp|Q6PAM1|TXLNA_MOUSE	Txlna	Alpha-taxilin OS=Mus musculus GN=Txlna PE=2 SV=1	23	17.5508	8.18034		0.170009	0.544093		-1.10131		0.0018978
sp|Q91XB0|TREX1_MOUSE	Trex1	Three prime repair exonuclease 1 OS=Mus musculus GN=Trex1 PE=1 SV=2	1	22.2824	5.85313		1.83088	0.487333		-1.92863		0.00192378
sp|Q6PCM1|KDM3A_MOUSE	Kdm3a	Lysine-specific demethylase 3A OS=Mus musculus GN=Kdm3a PE=1 SV=1	8	17.7148	7.52748		0.729547	0.918541		-1.23472		0.00192849
sp|Q9JJ66|CDC20_MOUSE	Cdc20	Cell division cycle protein 20 homolog OS=Mus musculus GN=Cdc20 PE=1 SV=2	4	17.8072	6.97392		1.05262	0.738932		-1.35242		0.00192901
sp|Q8R1M0|CC037_MOUSE		UPF0361 protein C3orf37 homolog OS=Mus musculus PE=2 SV=1	5	17.5353	7.68444		0.596665	0.963331		-1.19025		0.00192919
sp|P43275|H11_MOUSE	Hist1h1a	Histone H1.1 OS=Mus musculus GN=Hist1h1a PE=2 SV=2	12	25.3524	2.10853		2.35464	1.43427		-3.58781		0.00192978
sp|Q91WG3|TRUB2_MOUSE	Trub2	Probable tRNA pseudouridine synthase 2 OS=Mus musculus GN=Trub2 PE=2 SV=1	2	17.013	4.41181		1.37323	0.601089		-1.94719		0.00192997
sp|Q99JR8-2|SMRD2_MOUSE	Smarcd2	Isoform 2 of SWI/SNF-related matrix-associated actin-dependent regulator of chromatin subfamily D member 2 OS=Mus musculus GN=Smarcd2	12	16.7705	6.65556		1.15415	0.167967		-1.33329		0.00193097
sp|O55029|COPB2_MOUSE	Copb2	Coatomer subunit beta' OS=Mus musculus GN=Copb2 PE=2 SV=2	71	10.9194	15.5609		0.205276	0.496204		0.511031		0.00193211
sp|Q3UZ01-2|RBM40_MOUSE	Rnpc3	Isoform 2 of RNA-binding protein 40 OS=Mus musculus GN=Rnpc3	3	17.2815	7.32422		0.522579	1.01872		-1.23848		0.00193447
sp|Q9CR16|PPID_MOUSE	Ppid	Peptidyl-prolyl cis-trans isomerase D OS=Mus musculus GN=Ppid PE=1 SV=3	27	15.8811	6.87754		0.60275	0.920344		-1.20735		0.00193465
sp|Q9QUJ7-2|ACSL4_MOUSE	Acsl4	Isoform Short of Long-chain-fatty-acid--CoA ligase 4 OS=Mus musculus GN=Acsl4	24	13.3797	6.04491		0.522754	0.698397		-1.14625		0.00193576
sp|Q8BJ71|NUP93_MOUSE	Nup93	Nuclear pore complex protein Nup93 OS=Mus musculus GN=Nup93 PE=2 SV=1	55	14.468	9.75911		0.424655	0.36273		-0.568047		0.00193623
sp|Q9Z277|BAZ1B_MOUSE	Baz1b	Tyrosine-protein kinase BAZ1B OS=Mus musculus GN=Baz1b PE=1 SV=2	61	17.1611	7.09644		0.585828	1.08072		-1.27398		0.00193795
sp|Q8C8U0-3|LIPB1_MOUSE	Ppfibp1	Isoform 3 of Liprin-beta-1 OS=Mus musculus GN=Ppfibp1	55	11.0043	15.8856		0.385909	0.412275		0.529657		0.00193986
sp|Q8BUR4|DOCK1_MOUSE	Dock1	Dedicator of cytokinesis protein 1 OS=Mus musculus GN=Dock1 PE=1 SV=3	34	9.60839	15.8843		0.327066	0.694984		0.725232		0.00194045
tr|Q99LB4|Q99LB4_MOUSE	Capg	Capping protein (Actin filament), gelsolin-like OS=Mus musculus GN=Capg PE=2 SV=1	18	8.96098	20.644		0.662408	1.21643		1.204		0.0019407
sp|P62315|SMD1_MOUSE	Snrpd1	Small nuclear ribonucleoprotein Sm D1 OS=Mus musculus GN=Snrpd1 PE=2 SV=1	5	15.1515	8.22331		0.736302	0.358716		-0.881673		0.00194117
sp|Q3UKJ7|SMU1_MOUSE	Smu1	WD40 repeat-containing protein SMU1 OS=Mus musculus GN=Smu1 PE=2 SV=2	20	15.8551	9.02145		0.46025	0.663036		-0.813518		0.00194171
sp|Q6P5F9|XPO1_MOUSE	Xpo1	Exportin-1 OS=Mus musculus GN=Xpo1 PE=1 SV=1	55	15.4473	8.48163		0.632754	0.568353		-0.864944		0.00194227
sp|Q80U72-4|SCRIB_MOUSE	Scrib	Isoform 4 of Protein scribble homolog OS=Mus musculus GN=Scrib	34	14.7823	8.74749		0.508699	0.536845		-0.756934		0.00194406
sp|P97313|PRKDC_MOUSE	Prkdc	DNA-dependent protein kinase catalytic subunit OS=Mus musculus GN=Prkdc PE=1 SV=3	18	9.32915	13.4393		0.442323	0.241869		0.526637		0.00194411
sp|Q7TQC5-3|APTX_MOUSE	Aptx	Isoform 3 of Aprataxin OS=Mus musculus GN=Aptx	4	17.2704	7.41176		0.683581	0.958739		-1.22042		0.00194607
sp|O54910|IKBE_MOUSE	Nfkbie	NF-kappa-B inhibitor epsilon OS=Mus musculus GN=Nfkbie PE=2 SV=2	1	20.3028	8.86454		1.28156	0.442271		-1.19556		0.00194616
sp|O54790|MAFG_MOUSE	Mafg	Transcription factor MafG OS=Mus musculus GN=Mafg PE=1 SV=1	1	18.3914	5.03704		0.902794	1.32045		-1.86838		0.00194643
sp|Q78PG9|CCD25_MOUSE	Ccdc25	Coiled-coil domain-containing protein 25 OS=Mus musculus GN=Ccdc25 PE=1 SV=1	10	9.33445	15.7903		0.680904	0.396867		0.758399		0.00194742
sp|Q9DCA5|BRX1_MOUSE	Brix1	Ribosome biogenesis protein BRX1 homolog OS=Mus musculus GN=Brix1 PE=2 SV=3	20	14.0017	5.2965		0.934107	0.43647		-1.40249		0.00194814
sp|P43136|NR2F6_MOUSE	Nr2f6	Nuclear receptor subfamily 2 group F member 6 OS=Mus musculus GN=Nr2f6 PE=1 SV=2	2	16.3397	9.11332		0.633967	0.584958		-0.842336		0.00194898
sp|Q8R2T8-2|TF3C5_MOUSE	Gtf3c5	Isoform 2 of General transcription factor 3C polypeptide 5 OS=Mus musculus GN=Gtf3c5	10	14.6946	9.81527		0.151431	0.556028		-0.582183		0.00194912
sp|Q91WE6-2|CDKAL_MOUSE	Cdkal1	Isoform 2 of CDK5 regulatory subunit-associated protein 1-like 1 OS=Mus musculus GN=Cdkal1	3	16.2101	9.34359		0.766671	0.305026		-0.794844		0.00194983
sp|Q9D855|QCR7_MOUSE	Uqcrb	Cytochrome b-c1 complex subunit 7 OS=Mus musculus GN=Uqcrb PE=1 SV=3	10	15.6659	6.49738		0.599713	0.918474		-1.2697		0.00195197
sp|Q3UGF1|WDR19_MOUSE	Wdr19	WD repeat-containing protein 19 OS=Mus musculus GN=Wdr19 PE=1 SV=1	13	9.38127	17.7777		0.203555	0.987668		0.922211		0.00195285
sp|Q9DBS1|TMM43_MOUSE	Tmem43	Transmembrane protein 43 OS=Mus musculus GN=Tmem43 PE=1 SV=1	20	9.78459	16.7812		0.117467	0.829698		0.778263		0.00195294
sp|Q8BG81|PDIP3_MOUSE	Poldip3	Polymerase delta-interacting protein 3 OS=Mus musculus GN=Poldip3 PE=2 SV=1	25	16.1863	7.45397		0.587251	0.88961		-1.1187		0.00195351
sp|Q9JKF7|RM39_MOUSE	Mrpl39	39S ribosomal protein L39, mitochondrial OS=Mus musculus GN=Mrpl39 PE=2 SV=4	10	14.1871	9.38249		0.445417	0.351266		-0.596536		0.00195404
sp|Q8BHN1-3|TXLNG_MOUSE	Txlng	Isoform 3 of Gamma-taxilin OS=Mus musculus GN=Txlng	3	15.2235	9.82853		0.59725	0.250534		-0.631255		0.00195663
sp|Q9Z2N8|ACL6A_MOUSE	Actl6a	Actin-like protein 6A OS=Mus musculus GN=Actl6a PE=1 SV=2	18	16.4771	7.73603		0.396835	0.936026		-1.09079		0.00195668
sp|Q61466|SMRD1_MOUSE	Smarcd1	SWI/SNF-related matrix-associated actin-dependent regulator of chromatin subfamily D member 1 OS=Mus musculus GN=Smarcd1 PE=1 SV=3	13	18.4909	5.76126		1.47989	0.472123		-1.68236		0.0019576
tr|F2Z4A3|F2Z4A3_MOUSE	Fat1	Uncharacterized protein OS=Mus musculus GN=Fat1 PE=4 SV=1	125	3.67606	27.4233		0.375833	2.73392		2.89917		0.00195807
sp|Q8R3S6|EXOC1_MOUSE	Exoc1	Exocyst complex component 1 OS=Mus musculus GN=Exoc1 PE=2 SV=4	16	10.9988	15.5018		0.203321	0.491219		0.495091		0.00196147
sp|Q8C1A3|MTRR_MOUSE	Mtrr	Methionine synthase reductase OS=Mus musculus GN=Mtrr PE=2 SV=2	1	14.644	8.75297		0.660158	0.299475		-0.742461		0.00196243
sp|P70271|PDLI4_MOUSE	Pdlim4	PDZ and LIM domain protein 4 OS=Mus musculus GN=Pdlim4 PE=1 SV=3	12	23.9347	8.81362		1.14558	1.41689		-1.4413		0.00196404
sp|Q9JI44|DMAP1_MOUSE	Dmap1	DNA methyltransferase 1-associated protein 1 OS=Mus musculus GN=Dmap1 PE=1 SV=1	6	17.1421	7.17685		0.29431	1.17987		-1.25612		0.00196422
sp|Q5PRE5|CM023_MOUSE		Uncharacterized protein C13orf23 homolog OS=Mus musculus PE=2 SV=1	2	17.7118	6.56765		1.23839	0.442456		-1.43126		0.00196534
sp|Q8C0T5|SI1L1_MOUSE	Sipa1l1	Signal-induced proliferation-associated 1-like protein 1 OS=Mus musculus GN=Sipa1l1 PE=1 SV=2	18	7.1591	15.3627		0.800645	0.542439		1.10158		0.00196538
sp|Q8R3J4|MTER1_MOUSE	Mterfd1	mTERF domain-containing protein 1, mitochondrial OS=Mus musculus GN=Mterfd1 PE=2 SV=1	4	19.0811	3.70286		1.77934	0.246913		-2.36543		0.00196581
sp|Q9CWL8|CTBL1_MOUSE	Ctnnbl1	Beta-catenin-like protein 1 OS=Mus musculus GN=Ctnnbl1 PE=1 SV=1	14	14.3768	9.93421		0.294088	0.426292		-0.533268		0.00196605
tr|E9QNN9|E9QNN9_MOUSE	Gcfc1	Uncharacterized protein OS=Mus musculus GN=Gcfc1 PE=4 SV=1	15	16.7623	7.85616		0.562748	0.873801		-1.09332		0.00196623
sp|Q8K339|KIN17_MOUSE	Kin	DNA/RNA-binding protein KIN17 OS=Mus musculus GN=Kin PE=2 SV=1	7	17.8872	7.11233		0.821858	0.961973		-1.33053		0.00196641
tr|F6PZC9|F6PZC9_MOUSE	Sorbs1	Uncharacterized protein (Fragment) OS=Mus musculus GN=Sorbs1 PE=4 SV=1	2	7.20677	16.6373		0.491055	0.993912		1.207		0.00196699
sp|A2RSJ4|UH1BL_MOUSE	Uhrf1bp1l	UHRF1-binding protein 1-like OS=Mus musculus GN=Uhrf1bp1l PE=2 SV=2	20	8.32829	16.8078		0.599468	0.858058		1.01304		0.00196721
sp|Q99LJ7|RCBT2_MOUSE	Rcbtb2	RCC1 and BTB domain-containing protein 2 OS=Mus musculus GN=Rcbtb2 PE=2 SV=1	7	6.67169	20.5818		0.834883	1.47719		1.62525		0.00196825
sp|Q8VCD5|MED17_MOUSE	Med17	Mediator of RNA polymerase II transcription subunit 17 OS=Mus musculus GN=Med17 PE=1 SV=1	9	15.6802	8.73392		0.261014	0.815485		-0.844242		0.00196921
sp|Q9R1B9|SLIT2_MOUSE	Slit2	Slit homolog 2 protein OS=Mus musculus GN=Slit2 PE=2 SV=2	3	11.6311	3.58422		0.968707	0.217241		-1.69826		0.00196937
sp|O08529|CAN2_MOUSE	Capn2	Calpain-2 catalytic subunit OS=Mus musculus GN=Capn2 PE=2 SV=4	54	8.11268	18.0664		0.140746	1.16461		1.15506		0.00197107
sp|Q8R1S4-2|MTSS1_MOUSE	Mtss1	Isoform 2 of Metastasis suppressor protein 1 OS=Mus musculus GN=Mtss1	2	5.57514	21.626		1.11722	1.50984		1.95569		0.00197131
sp|Q8R480|NUP85_MOUSE	Nup85	Nuclear pore complex protein Nup85 OS=Mus musculus GN=Nup85 PE=1 SV=1	13	14.9868	7.37999		0.26508	0.852643		-1.022		0.0019714
sp|Q8VDP2|CX056_MOUSE		UPF0428 protein CXorf56 homolog OS=Mus musculus PE=2 SV=1	3	16.6825	8.74728		0.692384	0.67588		-0.93143		0.00197202
sp|Q9EQC4|ELOV4_MOUSE	Elovl4	Elongation of very long chain fatty acids protein 4 OS=Mus musculus GN=Elovl4 PE=1 SV=2	3	22.8247	1.6557		2.52857	0.407955		-3.78508		0.00197439
sp|P97304|RPAC2_MOUSE	Polr1d	DNA-directed RNA polymerases I and III subunit RPAC2 OS=Mus musculus GN=Polr1d PE=2 SV=1	2	16.1428	6.44716		1.05319	0.514334		-1.32416		0.00197467
sp|Q9D8T7|SLIRP_MOUSE	Slirp	SRA stem-loop-interacting RNA-binding protein, mitochondrial OS=Mus musculus GN=Slirp PE=1 SV=2	6	13.7308	7.99478		0.523789	0.478491		-0.780288		0.00197575
sp|Q9CS74|SGT1_MOUSE	Ecd	Protein SGT1 homolog OS=Mus musculus GN=Ecd PE=2 SV=2	5	13.5616	9.40328		0.482589	0.0721066		-0.528291		0.00197677
sp|O88487|DC1I2_MOUSE	Dync1i2	Cytoplasmic dynein 1 intermediate chain 2 OS=Mus musculus GN=Dync1i2 PE=2 SV=1	23	9.51877	16.7105		0.10275	0.87069		0.811905		0.00197725
sp|A2ASZ8-2|SCMC2_MOUSE	Slc25a25	Isoform 2 of Calcium-binding mitochondrial carrier protein SCaMC-2 OS=Mus musculus GN=Slc25a25	4	20.3818	6.67276		1.50342	0.590904		-1.61092		0.00197754
sp|Q3UMY5|EMAL4_MOUSE	Eml4	Echinoderm microtubule-associated protein-like 4 OS=Mus musculus GN=Eml4 PE=1 SV=1	14	15.8464	7.24757		0.529798	0.893812		-1.12859		0.00197845
tr|Q91XY0|Q91XY0_MOUSE	Pcdhga8	MCG133388, isoform CRA_m OS=Mus musculus GN=Pcdhga8 PE=2 SV=1	2	5.60362	26.1753		1.73307	1.7948		2.22377		0.00197889
sp|Q5NBX1-2|COBL_MOUSE	Cobl	Isoform 2 of Protein cordon-bleu OS=Mus musculus GN=Cobl	4	2.9409	28.1736		0.587863	3.00047		3.26001		0.00197894
tr|E9Q3G7|E9Q3G7_MOUSE	Atp11a	Uncharacterized protein OS=Mus musculus GN=Atp11a PE=4 SV=1	1	7.98159	21.1403		0.169639	1.59422		1.40525		0.00197953
sp|Q9CPY1|RM51_MOUSE	Mrpl51	39S ribosomal protein L51, mitochondrial OS=Mus musculus GN=Mrpl51 PE=2 SV=1	2	16.4744	6.21185		1.16818	0.442783		-1.40713		0.00197977
sp|Q91ZP3-2|LPIN1_MOUSE	Lpin1	Isoform 2 of Phosphatidate phosphatase LPIN1 OS=Mus musculus GN=Lpin1	3	8.72316	19.8159		1.07358	0.73484		1.18373		0.00198084
sp|Q8VCP8|KAD6_MOUSE	Taf9	Adenylate kinase isoenzyme 6 OS=Mus musculus GN=Taf9 PE=2 SV=1	4	17.7025	7.1393		1.0171	0.783399		-1.3101		0.00198129
sp|O88428|PAPS2_MOUSE	Papss2	Bifunctional 3'-phosphoadenosine 5'-phosphosulfate synthase 2 OS=Mus musculus GN=Papss2 PE=1 SV=2	24	4.47033	25.3976		0.259729	2.52856		2.50624		0.00198339
sp|P32020|NLTP_MOUSE	Scp2	Non-specific lipid-transfer protein OS=Mus musculus GN=Scp2 PE=1 SV=3	22	15.8334	10.0239		0.264478	0.233127		-0.659527		0.00198407
sp|Q8BZT9|CM031_MOUSE		UPF0124 protein C13orf31 homolog OS=Mus musculus PE=2 SV=1	1	5.48495	19.5862		0.615106	1.60236		1.83629		0.00198578
sp|Q8BIQ5-2|CSTF2_MOUSE	Cstf2	Isoform 2 of Cleavage stimulation factor subunit 2 OS=Mus musculus GN=Cstf2	19	15.5216	8.62435		0.711241	0.479975		-0.847787		0.00198886
sp|B8ZXI1|QTRD1_MOUSE	Qtrtd1	Queuine tRNA-ribosyltransferase subunit QTRTD1 OS=Mus musculus GN=Qtrtd1 PE=1 SV=2	3	15.7893	8.84219		0.519009	0.690627		-0.836472		0.0019922
sp|Q9JKY5|HIP1R_MOUSE	Hip1r	Huntingtin-interacting protein 1-related protein OS=Mus musculus GN=Hip1r PE=1 SV=2	16	17.2591	10.4044		0.580657	0.62135		-0.730158		0.00199351
sp|Q8C5N5|PDD2L_MOUSE	Pdcd2l	Programmed cell death protein 2-like OS=Mus musculus GN=Pdcd2l PE=2 SV=1	4	9.81641	14.4848		0.572631	0.10233		0.561269		0.00199507
sp|Q59J78|MIMIT_MOUSE	Ndufaf2	Mimitin, mitochondrial OS=Mus musculus GN=Ndufaf2 PE=2 SV=1	14	16.1431	7.9058		0.776241	0.667866		-1.02994		0.00199606
sp|Q1HFZ0|NSUN2_MOUSE	Nsun2	tRNA (cytosine(34)-C(5))-methyltransferase OS=Mus musculus GN=Nsun2 PE=1 SV=2	42	16.1796	7.38843		0.478465	0.981754		-1.13084		0.0019974
sp|Q9JJ06|C1GLT_MOUSE	C1galt1	Glycoprotein-N-acetylgalactosamine 3-beta-galactosyltransferase 1 OS=Mus musculus GN=C1galt1 PE=1 SV=1	5	7.64172	22.0337		1.73129	0.480402		1.52774		0.00200349
sp|Q05186|RCN1_MOUSE	Rcn1	Reticulocalbin-1 OS=Mus musculus GN=Rcn1 PE=1 SV=1	30	7.77686	19.4858		0.888293	1.16556		1.32517		0.00201062
sp|Q7TNP2|2AAB_MOUSE	Ppp2r1b	Serine/threonine-protein phosphatase 2A 65 kDa regulatory subunit A beta isoform OS=Mus musculus GN=Ppp2r1b PE=2 SV=2	15	14.6135	8.66243		0.524609	0.534096		-0.754462		0.00201288
sp|Q9CY57-3|FOP_MOUSE	Fop	Isoform 3 of Friend of PRMT1 protein OS=Mus musculus GN=Fop	6	17.0595	6.19522		0.686157	1.17961		-1.46135		0.00201354
sp|Q8C5Q4|GRSF1_MOUSE	Grsf1	G-rich sequence factor 1 OS=Mus musculus GN=Grsf1 PE=1 SV=2	9	14.7149	8.97897		0.684116	0.21671		-0.712656		0.002014
sp|Q8BX90|FND3A_MOUSE	Fndc3a	Fibronectin type-III domain-containing protein 3A OS=Mus musculus GN=Fndc3a PE=1 SV=3	29	6.83265	22.6155		0.1496	1.97377		1.7268		0.0020141
sp|A2AWL7-3|MGAP_MOUSE	Mga	Isoform 3 of MAX gene-associated protein OS=Mus musculus GN=Mga	2	15.6073	7.69992		0.685017	0.71853		-1.0193		0.00201593
tr|Q4VBW5|Q4VBW5_MOUSE	Exosc7	Exosome component 7 OS=Mus musculus GN=Exosc7 PE=2 SV=1	9	15.582	8.4078		0.583467	0.68824		-0.890081		0.00201716
sp|Q9Z2V5|HDAC6_MOUSE	Hdac6	Histone deacetylase 6 OS=Mus musculus GN=Hdac6 PE=1 SV=3	14	16.9474	10.4683		0.775679	0.242002		-0.695041		0.00202019
sp|Q9JKS4-2|LDB3_MOUSE	Ldb3	Isoform 2 of LIM domain-binding protein 3 OS=Mus musculus GN=Ldb3	1	14.9138	2.61017		1.21943	0.963956		-2.51443		0.00204055
sp|Q80ZJ6-2|ZER1_MOUSE	Zer1	Isoform 2 of Protein zer-1 homolog OS=Mus musculus GN=Zer1	1	10.5145	16.4393		0.433612	0.613188		0.644761		0.00204819
sp|Q52KE7-2|CCNL1_MOUSE	Ccnl1	Isoform 2 of Cyclin-L1 OS=Mus musculus GN=Ccnl1	2	17.7443	6.85395		1.00512	0.945479		-1.37235		0.00205148
tr|F6ZBR8|F6ZBR8_MOUSE	Wiz	Uncharacterized protein (Fragment) OS=Mus musculus GN=Wiz PE=4 SV=1	17	17.5774	7.09529		0.0729894	1.33046		-1.30879		0.00205201
sp|Q505F5|LRC47_MOUSE	Lrrc47	Leucine-rich repeat-containing protein 47 OS=Mus musculus GN=Lrrc47 PE=1 SV=1	31	16.5555	9.18906		0.290076	0.889999		-0.849322		0.0020555
tr|E9PWT1|E9PWT1_MOUSE	Trrap	Uncharacterized protein OS=Mus musculus GN=Trrap PE=4 SV=1	52	15.8464	8.81588		0.309991	0.289781		-0.845982		0.00205572
tr|Q9ERL0|Q9ERL0_MOUSE	Mllt1	Btk-PH-domain binding protein OS=Mus musculus GN=Mllt1 PE=2 SV=1	2	18.0099	5.74821		1.34416	0.785829		-1.6476		0.00205604
sp|Q9Z2D0|MTMR9_MOUSE	Mtmr9	Myotubularin-related protein 9 OS=Mus musculus GN=Mtmr9 PE=2 SV=2	9	8.29591	18.5643		0.249029	1.27694		1.16206		0.00205716
sp|A2A791|ZMYM4_MOUSE	Zmym4	Zinc finger MYM-type protein 4 OS=Mus musculus GN=Zmym4 PE=1 SV=1	14	16.9574	7.32712		0.715156	1.0117		-1.21059		0.00206244
tr|D3YVV7|D3YVV7_MOUSE	Nova2	Uncharacterized protein OS=Mus musculus GN=Nova2 PE=4 SV=1	2	18.6524	4.34357		1.16745	1.42691		-2.10241		0.0020626
tr|E0CX20|E0CX20_MOUSE	Bud31	Uncharacterized protein OS=Mus musculus GN=Bud31 PE=4 SV=1	4	16.4633	7.63827		1.00786	0.498449		-1.10794		0.00206418
sp|Q9Z2W0|DNPEP_MOUSE	Dnpep	Aspartyl aminopeptidase OS=Mus musculus GN=Dnpep PE=2 SV=2	21	8.50731	19.4191		0.998082	0.989427		1.1907		0.00206546
sp|Q80WE4-3|KI20B_MOUSE	Kif20b	Isoform 3 of Kinesin-like protein KIF20B OS=Mus musculus GN=Kif20b	19	18.2298	7.81776		1.08594	0.783827		-1.22147		0.00206699
sp|Q9CY73|RM44_MOUSE	Mrpl44	39S ribosomal protein L44, mitochondrial OS=Mus musculus GN=Mrpl44 PE=1 SV=3	4	15.6462	8.08423		0.770683	0.592454		-0.952633		0.00206816
sp|O88574|SAP30_MOUSE	Sap30	Histone deacetylase complex subunit SAP30 OS=Mus musculus GN=Sap30 PE=1 SV=1	1	19.9067	5.90415		1.56667	0.901776		-1.75346		0.00207226
sp|Q69ZQ2|ISY1_MOUSE	Isy1	Pre-mRNA-splicing factor ISY1 homolog OS=Mus musculus GN=Isy1 PE=1 SV=2	7	14.877	9.18516		0.685581	0.255311		-0.69571		0.00207311
sp|Q9QXP7|C1QT1_MOUSE	C1qtnf1	Complement C1q tumor necrosis factor-related protein 1 OS=Mus musculus GN=C1qtnf1 PE=2 SV=1	1	6.73672	24.0079		1.59159	1.5465		1.83339		0.00207682
sp|Q6ZPY2|SMG5_MOUSE	Smg5	Protein SMG5 OS=Mus musculus GN=Smg5 PE=2 SV=2	3	15.3172	7.61927		0.918841	0.382473		-1.00742		0.00207854
sp|P50637|TSPO_MOUSE	Tspo	Translocator protein OS=Mus musculus GN=Tspo PE=2 SV=1	2	15.878	8.17185		0.243703	0.95845		-0.958295		0.00207911
sp|Q3TCX3|K0907_MOUSE	Kiaa0907	UPF0469 protein KIAA0907 OS=Mus musculus GN=Kiaa0907 PE=2 SV=1	6	16.8746	8.34996		0.975355	0.497763		-1.01501		0.00208067
sp|Q8C2E4|PTCD1_MOUSE	Ptcd1	Pentatricopeptide repeat-containing protein 1 OS=Mus musculus GN=Ptcd1 PE=2 SV=2	3	14.4165	7.21107		0.436146	0.815204		-0.999435		0.00208407
sp|Q9QZS3-2|NUMB_MOUSE	Numb	Isoform 2 of Protein numb homolog OS=Mus musculus GN=Numb	3	8.58456	18.0003		0.851365	0.873979		1.06821		0.00208481
sp|Q8CFZ4|GPC3_MOUSE	Gpc3	Glypican-3 OS=Mus musculus GN=Gpc3 PE=2 SV=1	4	0.800311	32.1054		0.335647	4.00176		5.32611		0.00208828
tr|E9PXD2|E9PXD2_MOUSE	Dlc1	Uncharacterized protein OS=Mus musculus GN=Dlc1 PE=4 SV=1	9	10.263	20		0.294773	1.22644		0.962548		0.00208847
sp|Q9WVM1|RGAP1_MOUSE	Racgap1	Rac GTPase-activating protein 1 OS=Mus musculus GN=Racgap1 PE=2 SV=1	17	17.7529	6.03857		1.11244	1.03593		-1.55578		0.00209029
sp|Q99LD9|EI2BB_MOUSE	Eif2b2	Translation initiation factor eIF-2B subunit beta OS=Mus musculus GN=Eif2b2 PE=2 SV=1	12	14.4343	6.96554		0.84629	0.448092		-1.0512		0.00209031
sp|Q8K1H1|TDRD7_MOUSE	Tdrd7	Tudor domain-containing protein 7 OS=Mus musculus GN=Tdrd7 PE=1 SV=1	21	9.82531	18.4471		0.764858	0.821003		0.908819		0.0020904
sp|A6X8Z5|RHG31_MOUSE	Arhgap31	Rho GTPase-activating protein 31 OS=Mus musculus GN=Arhgap31 PE=1 SV=1	9	13.5055	9.70592		0.49296	0.0612668		-0.476607		0.00209245
sp|Q8BKG3|PTK7_MOUSE	Ptk7	Inactive tyrosine-protein kinase 7 OS=Mus musculus GN=Ptk7 PE=1 SV=1	28	20.4589	8.43375		1.47193	0.448304		-1.27849		0.00209281
sp|Q7TN02|MED26_MOUSE	Med26	Mediator of RNA polymerase II transcription subunit 26 OS=Mus musculus GN=Med26 PE=2 SV=1	3	16.5989	8.38483		0.873065	0.615005		-0.985234		0.00209403
tr|E0CY57|E0CY57_MOUSE	Nsmce4a	Uncharacterized protein OS=Mus musculus GN=Nsmce4a PE=4 SV=1	1	14.1559	7.5926		0.235886	0.820732		-0.898738		0.00209427
sp|Q08024-2|PEBB_MOUSE	Cbfb	Isoform 2 of Core-binding factor subunit beta OS=Mus musculus GN=Cbfb	8	17.7311	9.30545		0.469315	0.972698		-0.930132		0.00209454
sp|Q8CD10|EFHA1_MOUSE	Efha1	EF-hand domain-containing family member A1 OS=Mus musculus GN=Efha1 PE=2 SV=2	8	8.78451	20.3268		1.22877	0.875018		1.21035		0.00209533
sp|Q8BVE8-2|NSD2_MOUSE	Whsc1	Isoform 2 of Probable histone-lysine N-methyltransferase NSD2 OS=Mus musculus GN=Whsc1	16	18.2674	7.098		0.966801	1.08255		-1.36378		0.00209588
sp|Q9ER88|RT29_MOUSE	Dap3	28S ribosomal protein S29, mitochondrial OS=Mus musculus GN=Dap3 PE=2 SV=1	14	14.6149	7.76131		0.456237	0.772518		-0.913071		0.00209706
sp|O08919|NUMBL_MOUSE	Numbl	Numb-like protein OS=Mus musculus GN=Numbl PE=1 SV=3	5	8.4033	18.3051		0.501448	1.19729		1.12322		0.00209712
sp|O35638|STAG2_MOUSE	Stag2	Cohesin subunit SA-2 OS=Mus musculus GN=Stag2 PE=1 SV=3	32	18.0029	7.86088		1.21273	0.466932		-1.19547		0.00209776
sp|A2BH40|ARI1A_MOUSE	Arid1a	AT-rich interactive domain-containing protein 1A OS=Mus musculus GN=Arid1a PE=1 SV=1	28	16.9913	7.54113		1.17467	0.39169		-1.17194		0.002099
sp|Q56A08|GPKOW_MOUSE	Gpkow	G patch domain and KOW motifs-containing protein OS=Mus musculus GN=Gpkow PE=2 SV=2	13	17.6003	8.17221		0.483923	1.13185		-1.1068		0.00209902
sp|O35375-2|NRP2_MOUSE	Nrp2	Isoform A0 of Neuropilin-2 OS=Mus musculus GN=Nrp2	7	22.5944	2.92077		0.478939	1.07393		-2.95155		0.00210072
sp|Q8K1R7|NEK9_MOUSE	Nek9	Serine/threonine-protein kinase Nek9 OS=Mus musculus GN=Nek9 PE=1 SV=2	16	7.11304	19.2148		0.272735	1.55783		1.43368		0.00210084
sp|Q5I043-2|UBP28_MOUSE	Usp28	Isoform 2 of Ubiquitin carboxyl-terminal hydrolase 28 OS=Mus musculus GN=Usp28	5	14.9745	9.59371		0.266522	0.649694		-0.642344		0.00210152
sp|O35245|PKD2_MOUSE	Pkd2	Polycystin-2 OS=Mus musculus GN=Pkd2 PE=1 SV=2	16	8.81505	17.3687		0.540077	0.976129		0.97845		0.00210193
sp|Q8CCA0|DCNL4_MOUSE	Dcun1d4	DCN1-like protein 4 OS=Mus musculus GN=Dcun1d4 PE=2 SV=1	2	16.3109	7.61244		1.12948	0.19181		-1.09941		0.00211247
sp|Q99LI7|CSTF3_MOUSE	Cstf3	Cleavage stimulation factor subunit 3 OS=Mus musculus GN=Cstf3 PE=1 SV=1	24	14.6909	9.2547		0.256695	0.667992		-0.666661		0.00211402
sp|Q9QXA7|TRI44_MOUSE	Trim44	Tripartite motif-containing protein 44 OS=Mus musculus GN=Trim44 PE=2 SV=2	2	14.6777	9.44311		0.0678401	0.685523		-0.636292		0.00211734
sp|Q8C7E7|STBD1_MOUSE	Stbd1	Starch-binding domain-containing protein 1 OS=Mus musculus GN=Stbd1 PE=1 SV=1	5	11.7908	1.84197		1.00719	0.845693		-2.67835		0.00211981
sp|P97363|SPTC2_MOUSE	Sptlc2	Serine palmitoyltransferase 2 OS=Mus musculus GN=Sptlc2 PE=2 SV=2	13	8.88012	13.626		0.462522	0.423472		0.617715		0.00212201
sp|Q9CW46|RAVR1_MOUSE	Raver1	Ribonucleoprotein PTB-binding 1 OS=Mus musculus GN=Raver1 PE=1 SV=2	21	17.9709	6.64495		1.14527	0.953578		-1.43533		0.00212206
sp|Q9D6J3|CCD94_MOUSE	Ccdc94	Coiled-coil domain-containing protein 94 OS=Mus musculus GN=Ccdc94 PE=1 SV=1	3	16.7198	6.3745		1.07811	0.839607		-1.39118		0.00212473
sp|Q9DC22|DCAF6_MOUSE	Dcaf6	DDB1- and CUL4-associated factor 6 OS=Mus musculus GN=Dcaf6 PE=1 SV=1	1	7.0102	19.5555		0.103588	1.65317		1.48004		0.00212733
sp|Q6PGL7|FAM21_MOUSE	Fam21	WASH complex subunit FAM21 OS=Mus musculus GN=Fam21 PE=1 SV=1	35	11.4657	14.6671		0.087958	0.415792		0.355256		0.00213799
sp|Q921K9|BCL7B_MOUSE	Bcl7b	B-cell CLL/lymphoma 7 protein family member B OS=Mus musculus GN=Bcl7b PE=1 SV=1	3	16.886	8.08378		0.438156	1.08275		-1.06273		0.00214026
tr|Q6DFU8|Q6DFU8_MOUSE	Zfp948	Uncharacterized protein OS=Mus musculus GN=Zfp948 PE=2 SV=1	3	18.2748	6.25513		1.10823	1.14586		-1.54674		0.00214139
sp|O08739|AMPD3_MOUSE	Ampd3	AMP deaminase 3 OS=Mus musculus GN=Ampd3 PE=2 SV=2	3	28.9759	1.86661		3.60472	0.174663		-3.95636		0.00215578
sp|Q8VDS4|RPR1A_MOUSE	Rprd1a	Regulation of nuclear pre-mRNA domain-containing protein 1A OS=Mus musculus GN=Rprd1a PE=2 SV=1	4	15.3572	6.37209		1.12709	0.411561		-1.26908		0.00216484
sp|A2ABV5|MED14_MOUSE	Med14	Mediator of RNA polymerase II transcription subunit 14 OS=Mus musculus GN=Med14 PE=1 SV=1	13	16.0149	7.63864		0.527385	0.984936		-1.06803		0.00216629
sp|Q62406-2|IRAK1_MOUSE	Irak1	Isoform 2 of Interleukin-1 receptor-associated kinase 1 OS=Mus musculus GN=Irak1	1	9.51465	16.6877		0.364847	0.885583		0.810559		0.00216974
sp|Q80UM3|NAA15_MOUSE	Naa15	N-alpha-acetyltransferase 15, NatA auxiliary subunit OS=Mus musculus GN=Naa15 PE=1 SV=1	51	15.5613	7.96814		0.827923	0.587928		-0.965651		0.00217107
sp|P13864|DNMT1_MOUSE	Dnmt1	DNA (cytosine-5)-methyltransferase 1 OS=Mus musculus GN=Dnmt1 PE=1 SV=5	67	18.4517	5.76689		0.977664	1.38805		-1.67789		0.00217263
sp|Q60875-4|ARHG2_MOUSE	Arhgef2	Isoform 4 of Rho guanine nucleotide exchange factor 2 OS=Mus musculus GN=Arhgef2	43	15.0824	5.93585		0.822444	0.909062		-1.34534		0.00217846
sp|O08553|DPYL2_MOUSE	Dpysl2	Dihydropyrimidinase-related protein 2 OS=Mus musculus GN=Dpysl2 PE=1 SV=2	57	8.73208	18.4966		1.01949	0.822144		1.08286		0.00217904
sp|Q8K2H2|OTU6B_MOUSE	Otud6b	OTU domain-containing protein 6B OS=Mus musculus GN=Otud6b PE=2 SV=1	6	14.6517	10.5103		0.348177	0.433368		-0.479256		0.00218016
sp|Q810S1|C109B_MOUSE	Ccdc109b	Coiled-coil domain-containing protein 109B OS=Mus musculus GN=Ccdc109b PE=2 SV=1	5	22.1228	6.7619		1.12199	1.73412		-1.71003		0.00218314
sp|Q8R4R6|NUP53_MOUSE	Nup35	Nucleoporin NUP53 OS=Mus musculus GN=Nup35 PE=1 SV=2	7	15.5314	7.61837		1.04444	0.202263		-1.02763		0.0021877
sp|Q8JZX3-2|POC1A_MOUSE	Poc1a	Isoform 2 of POC1 centriolar protein homolog A OS=Mus musculus GN=Poc1a	1	16.15	9.02427		0.427311	0.860922		-0.839651		0.00219859
sp|Q9CWX9|DDX47_MOUSE	Ddx47	Probable ATP-dependent RNA helicase DDX47 OS=Mus musculus GN=Ddx47 PE=2 SV=2	17	15.6218	5.74898		1.22936	0.509637		-1.44219		0.0021987
sp|Q9JMG2|C1GLC_MOUSE	C1galt1c1	C1GALT1-specific chaperone 1 OS=Mus musculus GN=C1galt1c1 PE=2 SV=1	3	8.57736	20.6989		1.41375	0.823971		1.27095		0.0022
tr|Q80X98|Q80X98_MOUSE	Dhx38	DEAH (Asp-Glu-Ala-His) box polypeptide 38 OS=Mus musculus GN=Dhx38 PE=2 SV=1	14	17.1184	8.22136		0.346011	1.1514		-1.0581		0.00220302
sp|Q7TT79|MCPH1_MOUSE	Mcph1	Microcephalin OS=Mus musculus GN=Mcph1 PE=2 SV=1	1	17.9063	10.2419		0.902004	0.510447		-0.805981		0.00220339
sp|Q05CL8|LARP7_MOUSE	Larp7	La-related protein 7 OS=Mus musculus GN=Larp7 PE=1 SV=2	23	16.8457	7.57408		0.574409	1.11911		-1.15324		0.00221495
tr|E9Q286|E9Q286_MOUSE	BC018507	Uncharacterized protein OS=Mus musculus GN=BC018507 PE=4 SV=1	2	17.6752	7.58565		0.960446	0.976763		-1.22038		0.00221548
sp|Q8BND3-2|WDR35_MOUSE	Wdr35	Isoform 2 of WD repeat-containing protein 35 OS=Mus musculus GN=Wdr35	11	6.90937	20.8038		0.355043	1.8492		1.59022		0.00221652
sp|A2AVA0|SVEP1_MOUSE	Svep1	Sushi, von Willebrand factor type A, EGF and pentraxin domain-containing protein 1 OS=Mus musculus GN=Svep1 PE=1 SV=1	14	3.63244	23.4749		0.391732	2.66307		2.6921		0.00221947
sp|Q8BHX3-2|BOREA_MOUSE	Cdca8	Isoform 2 of Borealin OS=Mus musculus GN=Cdca8	9	20.2875	5.68754		1.6355	1.13593		-1.83471		0.00222128
sp|Q8BX09-2|RBBP5_MOUSE	Rbbp5	Isoform 2 of Retinoblastoma-binding protein 5 OS=Mus musculus GN=Rbbp5	9	14.7205	10.1852		0.0352371	0.616946		-0.531343		0.00222396
sp|Q6S5J6-2|KRIT1_MOUSE	Krit1	Isoform 2 of Krev interaction trapped protein 1 OS=Mus musculus GN=Krit1	9	10.5234	15.6011		0.456594	0.520406		0.568044		0.00222404
sp|Q6DID3|SCAF8_MOUSE	Scaf8	Protein SCAF8 OS=Mus musculus GN=Scaf8 PE=1 SV=1	14	16.2223	8.94775		0.292597	0.9465		-0.858384		0.00222511
sp|Q9JHT5|AMER1_MOUSE	Ammecr1	AMME syndrome candidate gene 1 protein homolog OS=Mus musculus GN=Ammecr1 PE=2 SV=1	4	15.149	7.04853		0.589045	0.932418		-1.10383		0.00222856
sp|Q7TNG5-2|EMAL2_MOUSE	Eml2	Isoform 2 of Echinoderm microtubule-associated protein-like 2 OS=Mus musculus GN=Eml2	7	3.40886	26.5184		0.0657993	3.15791		2.95963		0.00222859
sp|Q61371|IFT88_MOUSE	Ift88	Intraflagellar transport protein 88 homolog OS=Mus musculus GN=Ift88 PE=1 SV=2	4	8.52719	17.7279		0.310271	1.21321		1.05588		0.00223123
sp|Q8BZS9-2|DHX32_MOUSE	Dhx32	Isoform 2 of Putative pre-mRNA-splicing factor ATP-dependent RNA helicase DHX32 OS=Mus musculus GN=Dhx32	6	13.3601	15.9022		0.0786216	0.33838		0.251296		0.00223272
sp|Q91YL2|RN126_MOUSE	Rnf126	RING finger protein 126 OS=Mus musculus GN=Rnf126 PE=1 SV=1	4	15.2413	8.38571		0.930683	0.118124		-0.861982		0.00223356
sp|Q8VDT9|RM50_MOUSE	Mrpl50	39S ribosomal protein L50, mitochondrial OS=Mus musculus GN=Mrpl50 PE=2 SV=2	5	15.5787	7.28644		0.838979	0.766087		-1.09629		0.00223854
sp|Q8C569|F118B_MOUSE	Fam118b	Protein FAM118B OS=Mus musculus GN=Fam118b PE=2 SV=1	4	16.5561	8.316		0.492343	1.01912		-0.993398		0.00224952
sp|Q61245|COBA1_MOUSE	Col11a1	Collagen alpha-1(XI) chain OS=Mus musculus GN=Col11a1 PE=1 SV=2	33	5.03556	25.4527		0.896479	2.6566		2.3376		0.00225317
sp|P48281|VDR_MOUSE	Vdr	Vitamin D3 receptor OS=Mus musculus GN=Vdr PE=2 SV=2	1	12.4356	5.02387		1.00359	0.182977		-1.3076		0.00226214
sp|Q80YA7|DPP8_MOUSE	Dpp8	Dipeptidyl peptidase 8 OS=Mus musculus GN=Dpp8 PE=1 SV=1	11	9.52704	18.3008		0.334046	1.16675		0.941806		0.00227294
sp|Q8BYH7|TBC17_MOUSE	Tbc1d17	TBC1 domain family member 17 OS=Mus musculus GN=Tbc1d17 PE=2 SV=2	6	9.04262	15.9857		0.386994	0.878371		0.821972		0.00227326
sp|Q7M6Y3-5|PICA_MOUSE	Picalm	Isoform 5 of Phosphatidylinositol-binding clathrin assembly protein OS=Mus musculus GN=Picalm	23	10.9843	14.8716		0.124773	0.52144		0.437121		0.00227502
sp|Q9JLB2|MPP5_MOUSE	Mpp5	MAGUK p55 subfamily member 5 OS=Mus musculus GN=Mpp5 PE=1 SV=1	12	10.0225	16.017		0.226688	0.817706		0.676354		0.00227691
sp|Q9DCE5|PK1IP_MOUSE	Pak1ip1	p21-activated protein kinase-interacting protein 1 OS=Mus musculus GN=Pak1ip1 PE=2 SV=2	21	16.0505	6.01093		1.22093	0.657645		-1.41696		0.00227718
tr|D3YUJ3|D3YUJ3_MOUSE	Ccnyl1	Uncharacterized protein OS=Mus musculus GN=Ccnyl1 PE=3 SV=1	3	8.00582	15.724		0.461688	0.961751		0.973851		0.00227742
sp|Q9CVD2|ATX3_MOUSE	Atxn3	Ataxin-3 OS=Mus musculus GN=Atxn3 PE=1 SV=2	2	7.53492	16.0845		0.430546	1.13345		1.09401		0.00227809
sp|A2AJT4|PNISR_MOUSE	Pnisr	Arginine/serine-rich protein PNISR OS=Mus musculus GN=Pnisr PE=1 SV=1	4	17.738	6.93472		1.44143	0.402063		-1.35493		0.00227988
sp|Q9D8M7-2|PHF10_MOUSE	Phf10	Isoform 2 of PHD finger protein 10 OS=Mus musculus GN=Phf10	6	15.3018	6.61922		0.464323	1.11516		-1.20897		0.00228032
tr|E9Q4D0|E9Q4D0_MOUSE	Pcsk6	Uncharacterized protein OS=Mus musculus GN=Pcsk6 PE=3 SV=1	1	4.231	27.2458		2.44472	2.15296		2.68696		0.00228124
sp|Q9JJ11-2|TACC3_MOUSE	Tacc3	Isoform 2 of Transforming acidic coiled-coil-containing protein 3 OS=Mus musculus GN=Tacc3	11	17.7025	6.73801		0.708159	1.38303		-1.39356		0.0022816
sp|Q64433|CH10_MOUSE	Hspe1	10 kDa heat shock protein, mitochondrial OS=Mus musculus GN=Hspe1 PE=1 SV=2	26	14.6755	9.99154		0.499686	0.437492		-0.554627		0.00228163
tr|F6SMY7|F6SMY7_MOUSE	Mycbp2	Uncharacterized protein (Fragment) OS=Mus musculus GN=Mycbp2 PE=4 SV=1	1	4.75089	24.6365		1.14068	2.57166		2.37453		0.00228193
sp|O55098|STK10_MOUSE	Stk10	Serine/threonine-protein kinase 10 OS=Mus musculus GN=Stk10 PE=1 SV=2	26	8.07483	19.6399		0.685178	1.44309		1.28229		0.00228271
sp|Q924H2|MED15_MOUSE	Med15	Mediator of RNA polymerase II transcription subunit 15 OS=Mus musculus GN=Med15 PE=2 SV=2	7	15.4214	7.90349		1.03921	0.224534		-0.964375		0.0022837
sp|Q60972|RBBP4_MOUSE	Rbbp4	Histone-binding protein RBBP4 OS=Mus musculus GN=Rbbp4 PE=1 SV=5	26	16.7881	7.99504		0.603034	1.08694		-1.07026		0.0022852
sp|Q64674|SPEE_MOUSE	Srm	Spermidine synthase OS=Mus musculus GN=Srm PE=2 SV=1	28	16.1818	7.47906		0.876224	0.835491		-1.11344		0.0022854
sp|Q9CXV9|DCNL5_MOUSE	Dcun1d5	DCN1-like protein 5 OS=Mus musculus GN=Dcun1d5 PE=2 SV=1	7	18.0419	6.33772		1.64258	0.184648		-1.50932		0.00228683
sp|A2CG63-2|ARI4B_MOUSE	Arid4b	Isoform 2 of AT-rich interactive domain-containing protein 4B OS=Mus musculus GN=Arid4b	12	16.6807	8.56799		0.769713	0.824943		-0.961152		0.00228803
tr|E9PWG2|E9PWG2_MOUSE	Trappc8	Uncharacterized protein OS=Mus musculus GN=Trappc8 PE=4 SV=1	19	9.08457	15.0097		0.19862	0.813631		0.724401		0.00228967
sp|Q8BVG4|DPP9_MOUSE	Dpp9	Dipeptidyl peptidase 9 OS=Mus musculus GN=Dpp9 PE=2 SV=2	13	10.6487	15.2024		0.139079	0.617632		0.513625		0.00229058
sp|Q61091|FZD8_MOUSE	Fzd8	Frizzled-8 OS=Mus musculus GN=Fzd8 PE=1 SV=2	1	5.48339	24.984		1.34321	2.36461		2.18787		0.00229071
sp|O35459|ECH1_MOUSE	Ech1	Delta(3,5)-Delta(2,4)-dienoyl-CoA isomerase, mitochondrial OS=Mus musculus GN=Ech1 PE=2 SV=1	9	5.0975	21.1569		0.713854	2.15242		2.05326		0.0022909
sp|Q80VC6|TSAP1_MOUSE	Trnau1ap	tRNA selenocysteine 1-associated protein 1 OS=Mus musculus GN=Trnau1ap PE=1 SV=2	3	15.3538	9.36454		0.303287	0.779389		-0.713315		0.00229143
sp|P29037|TBP_MOUSE	Tbp	TATA-box-binding protein OS=Mus musculus GN=Tbp PE=1 SV=1	3	16.1186	7.98434		0.797015	0.806629		-1.01348		0.00229298
sp|Q99MR6-2|SRRT_MOUSE	Srrt	Isoform B of Serrate RNA effector molecule homolog OS=Mus musculus GN=Srrt	45	15.113	8.7939		0.204837	0.854033		-0.781215		0.00229326
sp|Q9WTI7|MYO1C_MOUSE	Myo1c	Myosin-Ic OS=Mus musculus GN=Myo1c PE=1 SV=2	1	2.77233	30.0297		0.0924206	3.78291		3.43722		0.00229416
sp|Q8R550-2|SH3K1_MOUSE	Sh3kbp1	Isoform 2 of SH3 domain-containing kinase-binding protein 1 OS=Mus musculus GN=Sh3kbp1	32	16.0979	6.65457		0.368949	1.25891		-1.27446		0.00229463
sp|P56960|EXOSX_MOUSE	Exosc10	Exosome component 10 OS=Mus musculus GN=Exosc10 PE=1 SV=2	28	15.4208	8.63837		0.595693	0.749881		-0.836044		0.00229574
sp|Q00609|CD80_MOUSE	Cd80	T-lymphocyte activation antigen CD80 OS=Mus musculus GN=Cd80 PE=1 SV=1	3	1.33888	31.6121		0.215072	4.22136		4.56138		0.00229599
sp|P17809|GTR1_MOUSE	Slc2a1	Solute carrier family 2, facilitated glucose transporter member 1 OS=Mus musculus GN=Slc2a1 PE=1 SV=4	5	20.184	4.24354		2.1988	0.477199		-2.24987		0.00229763
sp|A4Q9F0-2|TTLL7_MOUSE	Ttll7	Isoform 2 of Tubulin polyglutamylase TTLL7 OS=Mus musculus GN=Ttll7	1	22.0322	3.62484		2.55384	0.471811		-2.60363		0.00229893
sp|Q5SSW2|PSME4_MOUSE	Psme4	Proteasome activator complex subunit 4 OS=Mus musculus GN=Psme4 PE=1 SV=1	25	13.6349	9.51778		0.474896	0.334077		-0.51861		0.00230034
sp|P55200-2|MLL1_MOUSE	Mll	Isoform 2 of Histone-lysine N-methyltransferase MLL OS=Mus musculus GN=Mll	11	18.3059	7.1434		1.31635	0.858396		-1.35763		0.00230059
sp|Q61550|RAD21_MOUSE	Rad21	Double-strand-break repair protein rad21 homolog OS=Mus musculus GN=Rad21 PE=1 SV=3	11	17.5145	8.04742		1.32478	0.115775		-1.12195		0.00230171
sp|Q924T3|XRCC4_MOUSE	Xrcc4	DNA repair protein XRCC4 OS=Mus musculus GN=Xrcc4 PE=1 SV=1	8	14.8394	10.9708		0.0395156	0.549613		-0.435764		0.00230205
sp|Q9WVA2|TIM8A_MOUSE	Timm8a1	Mitochondrial import inner membrane translocase subunit Tim8 A OS=Mus musculus GN=Timm8a1 PE=1 SV=1	5	13.6948	6.54832		0.791774	0.612351		-1.06443		0.00230238
sp|Q9D1H8|RM53_MOUSE	Mrpl53	39S ribosomal protein L53, mitochondrial OS=Mus musculus GN=Mrpl53 PE=2 SV=1	6	15.2592	8.24065		0.716111	0.682018		-0.888853		0.00230275
sp|Q01320|TOP2A_MOUSE	Top2a	DNA topoisomerase 2-alpha OS=Mus musculus GN=Top2a PE=1 SV=1	83	17.1197	8.48222		0.387501	1.15451		-1.01314		0.00230326
sp|Q9D902|T2EB_MOUSE	Gtf2e2	General transcription factor IIE subunit 2 OS=Mus musculus GN=Gtf2e2 PE=2 SV=2	7	13.7685	10.7112		0.378973	0.20169		-0.362248		0.00230394
sp|Q3URE1|ACSF3_MOUSE	Acsf3	Acyl-CoA synthetase family member 3, mitochondrial OS=Mus musculus GN=Acsf3 PE=2 SV=2	7	10.4673	15.4447		0.701884	0.0981571		0.561223		0.00230395
sp|P48725|PCNT_MOUSE	Pcnt	Pericentrin OS=Mus musculus GN=Pcnt PE=1 SV=2	20	16.7477	9.36673		0.944734	0.421742		-0.838343		0.00230414
sp|Q60598|SRC8_MOUSE	Cttn	Src substrate cortactin OS=Mus musculus GN=Cttn PE=1 SV=2	49	9.74196	17.5295		0.172741	1.0818		0.847504		0.00230415
sp|Q8BN78|KAISO_MOUSE	Zbtb33	Transcriptional regulator Kaiso OS=Mus musculus GN=Zbtb33 PE=1 SV=1	2	18.9077	8.08538		1.25267	0.896019		-1.22559		0.00230424
sp|P97863|NFIB_MOUSE	Nfib	Nuclear factor 1 B-type OS=Mus musculus GN=Nfib PE=1 SV=2	7	20.1573	5.93558		1.79568	0.871375		-1.76384		0.00230448
sp|Q8VDJ3|VIGLN_MOUSE	Hdlbp	Vigilin OS=Mus musculus GN=Hdlbp PE=1 SV=1	100	10.8099	15.3837		0.3153	0.561372		0.509042		0.0023052
sp|Q9D8M4|RL7L_MOUSE	Rpl7l1	60S ribosomal protein L7-like 1 OS=Mus musculus GN=Rpl7l1 PE=2 SV=1	8	16.0535	4.188		1.65826	0.183343		-1.93855		0.00230522
sp|Q04841|3MG_MOUSE	Mpg	DNA-3-methyladenine glycosylase OS=Mus musculus GN=Mpg PE=2 SV=3	3	13.9839	8.31332		0.431203	0.666768		-0.750267		0.00230593
sp|Q9CWV6|PKRI1_MOUSE	Prkrip1	PRKR-interacting protein 1 OS=Mus musculus GN=Prkrip1 PE=1 SV=2	5	16.1029	6.50681		0.351824	1.29644		-1.3073		0.00230856
sp|Q8R086|SUOX_MOUSE	Suox	Sulfite oxidase, mitochondrial OS=Mus musculus GN=Suox PE=1 SV=2	6	8.36625	20.7144		1.45584	0.939843		1.30798		0.0023091
sp|Q8BGQ4-3|POMT2_MOUSE	Pomt2	Isoform 3 of Protein O-mannosyl-transferase 2 OS=Mus musculus GN=Pomt2	5	8.5351	15.2965		0.71349	0.650257		0.841718		0.00231328
sp|P97496-2|SMRC1_MOUSE	Smarcc1	Isoform 2 of SWI/SNF complex subunit SMARCC1 OS=Mus musculus GN=Smarcc1	40	19.3254	6.19133		1.46708	1.16699		-1.64218		0.0023155
sp|Q9CZP5|BCS1_MOUSE	Bcs1l	Mitochondrial chaperone BCS1 OS=Mus musculus GN=Bcs1l PE=1 SV=1	5	9.2619	15.869		0.583331	0.742452		0.776828		0.00231662
sp|Q3UK10|B9D2_MOUSE	B9d2	B9 domain-containing protein 2 OS=Mus musculus GN=B9d2 PE=1 SV=2	1	8.53343	13.1957		0.542417	0.392394		0.628874		0.00233478
sp|Q8K2T4|CK083_MOUSE		UPF0723 protein C11orf83 homolog OS=Mus musculus PE=2 SV=1	2	16.452	4.25729		1.68621	0.480012		-1.95026		0.00233582
sp|Q05BC3-2|EMAL1_MOUSE	Eml1	Isoform 2 of Echinoderm microtubule-associated protein-like 1 OS=Mus musculus GN=Eml1	20	7.52291	14.1773		0.420746	0.856918		0.914223		0.00233649
sp|Q9CW03|SMC3_MOUSE	Smc3	Structural maintenance of chromosomes protein 3 OS=Mus musculus GN=Smc3 PE=1 SV=2	71	17.7211	8.26791		0.893896	1.02504		-1.09988		0.00233748
sp|Q6NSU3|GL8D1_MOUSE	Glt8d1	Glycosyltransferase 8 domain-containing protein 1 OS=Mus musculus GN=Glt8d1 PE=2 SV=1	9	8.40606	20.2303		0.375983	1.65526		1.26702		0.00233748
tr|Q8R3E2|Q8R3E2_MOUSE	Ect2	Ect2 oncogene, isoform CRA_f OS=Mus musculus GN=Ect2 PE=2 SV=1	14	16.7731	7.11292		0.75774	1.16336		-1.23764		0.00233793
sp|Q9QYC0|ADDA_MOUSE	Add1	Alpha-adducin OS=Mus musculus GN=Add1 PE=1 SV=2	21	9.32315	19.5823		1.27762	0.727802		1.07066		0.002338
sp|Q99KL7|RAB28_MOUSE	Rab28	Ras-related protein Rab-28 OS=Mus musculus GN=Rab28 PE=2 SV=1	3	7.13412	20.9166		0.594901	1.88492		1.55184		0.00233854
sp|O08573-2|LEG9_MOUSE	Lgals9	Isoform Short of Galectin-9 OS=Mus musculus GN=Lgals9	7	7.1315	17.1305		0.937609	1.0935		1.26429		0.00233918
sp|P70335-2|ROCK1_MOUSE	Rock1	Isoform 2 of Rho-associated protein kinase 1 OS=Mus musculus GN=Rock1	34	9.40292	13.1148		0.47707	0.240913		0.480019		0.00233942
sp|P51943|CCNA2_MOUSE	Ccna2	Cyclin-A2 OS=Mus musculus GN=Ccna2 PE=1 SV=2	9	18.4834	6.71341		0.49446	1.62456		-1.46111		0.00234317
sp|Q9D850|TMM68_MOUSE	Tmem68	Transmembrane protein 68 OS=Mus musculus GN=Tmem68 PE=2 SV=1	1	20.0423	7.82637		1.39093	1.09049		-1.35663		0.00234411
sp|P97377-2|CDK2_MOUSE	Cdk2	Isoform CDK2-alpha of Cyclin-dependent kinase 2 OS=Mus musculus GN=Cdk2	9	18.0737	6.88249		1.59686	0.234496		-1.39289		0.00234442
tr|D3Z5R0|D3Z5R0_MOUSE	E330016A19	RIKEN cDNA E330016A19, isoform CRA_e OS=Mus musculus GN=E330016A19Rik PE=4 SV=1	4	18.7972	4.99369		1.87158	0.69442		-1.91234		0.00234498
tr|Q6P6L6|Q6P6L6_MOUSE	Gemin4	Gem (Nuclear organelle) associated protein 4 OS=Mus musculus GN=Gemin4 PE=2 SV=1	13	13.7502	7.57305		0.841811	0.295098		-0.860509		0.00234649
sp|Q91V98|CD248_MOUSE	Cd248	Endosialin OS=Mus musculus GN=Cd248 PE=2 SV=1	5	4.27643	16.8065		0.75481	1.64681		1.97454		0.00234718
sp|Q8C0D0-2|TRUB1_MOUSE	Trub1	Isoform 2 of Probable tRNA pseudouridine synthase 1 OS=Mus musculus GN=Trub1	2	19.3753	9.45258		0.802329	1.18863		-1.03544		0.0023489
sp|Q5SWD9|TSR1_MOUSE	Tsr1	Pre-rRNA-processing protein TSR1 homolog OS=Mus musculus GN=Tsr1 PE=2 SV=1	19	15.1359	6.70072		0.830362	0.903365		-1.17559		0.0023788
sp|Q6PDI5-2|ECM29_MOUSE	Ecm29	Isoform 2 of Proteasome-associated protein ECM29 homolog OS=Mus musculus GN=Ecm29	62	15.1304	10.5306		0.597112	0.301576		-0.522858		0.0023817
sp|Q3U0V1|FUBP2_MOUSE	Khsrp	Far upstream element-binding protein 2 OS=Mus musculus GN=Khsrp PE=1 SV=2	55	16.4429	8.14935		0.284371	1.17173		-1.0127		0.00238368
sp|Q91XU0|WRIP1_MOUSE	Wrnip1	ATPase WRNIP1 OS=Mus musculus GN=Wrnip1 PE=1 SV=2	16	16.8216	8.51382		0.604386	1.05171		-0.982439		0.0023838
sp|Q9R1Y5|HIC1_MOUSE	Hic1	Hypermethylated in cancer 1 protein OS=Mus musculus GN=Hic1 PE=1 SV=3	2	0.731262	5.49105		0.362518	0.592748		2.90862		0.00238672
tr|Q80TR0|Q80TR0_MOUSE	Nfat5	MKIAA0827 protein (Fragment) OS=Mus musculus GN=Nfat5 PE=2 SV=1	1	18.9577	5.703		1.37793	1.3569		-1.73299		0.00238687
tr|E9Q8G1|E9Q8G1_MOUSE	Sfswap	Uncharacterized protein OS=Mus musculus GN=Sfswap PE=4 SV=1	3	17.2191	8.38767		0.814861	0.997839		-1.03766		0.00239022
sp|Q9D1N9|RM21_MOUSE	Mrpl21	39S ribosomal protein L21, mitochondrial OS=Mus musculus GN=Mrpl21 PE=2 SV=1	6	15.361	8.46064		0.567136	0.831076		-0.860437		0.00239099
sp|P31266-2|SUH_MOUSE	Rbpj	Isoform 2 of Recombining binding protein suppressor of hairless OS=Mus musculus GN=Rbpj	13	16.8251	6.77442		0.554678	1.35596		-1.31244		0.00239305
sp|Q8K2Y7|RM47_MOUSE	Mrpl47	39S ribosomal protein L47, mitochondrial OS=Mus musculus GN=Mrpl47 PE=2 SV=2	4	15.5602	6.52809		1.02953	0.829674		-1.25313		0.00240343
sp|Q80UW8|RPAB1_MOUSE	Polr2e	DNA-directed RNA polymerases I, II, and III subunit RPABC1 OS=Mus musculus GN=Polr2e PE=2 SV=1	7	15.2461	7.0758		0.565431	1.05587		-1.10747		0.00240669
sp|Q6PB93|GALT2_MOUSE	Galnt2	Polypeptide N-acetylgalactosaminyltransferase 2 OS=Mus musculus GN=Galnt2 PE=2 SV=1	20	8.29247	15.1427		0.73378	0.685472		0.868748		0.00241087
sp|P57784|RU2A_MOUSE	Snrpa1	U2 small nuclear ribonucleoprotein A' OS=Mus musculus GN=Snrpa1 PE=1 SV=2	11	15.3034	8.86278		0.631508	0.704662		-0.78802		0.00242219
sp|Q8VCB1|NDC1_MOUSE	Tmem48	Nucleoporin NDC1 OS=Mus musculus GN=Tmem48 PE=1 SV=1	9	15.2265	6.30793		0.935493	0.93244		-1.27135		0.00244402
sp|Q9D7W5|MED8_MOUSE	Med8	Mediator of RNA polymerase II transcription subunit 8 OS=Mus musculus GN=Med8 PE=2 SV=1	3	15.6378	7.30044		0.966498	0.767535		-1.09898		0.00244466
sp|P97433-2|RGNEF_MOUSE	Rgnef	Isoform 2 of Rho-guanine nucleotide exchange factor OS=Mus musculus GN=Rgnef	2	21.5186	5.68578		2.2155	0.783215		-1.92016		0.00244497
sp|P53995|APC1_MOUSE	Anapc1	Anaphase-promoting complex subunit 1 OS=Mus musculus GN=Anapc1 PE=1 SV=2	30	10.6094	15.1046		0.440618	0.494539		0.509646		0.00244505
sp|Q8BM39|PRP18_MOUSE	Prpf18	Pre-mRNA-splicing factor 18 OS=Mus musculus GN=Prpf18 PE=1 SV=1	4	18.0637	5.58091		1.82472	0.260038		-1.69452		0.00244506
sp|Q8BHE1|GEMI8_MOUSE	Gemin8	Gem-associated protein 8 OS=Mus musculus GN=Gemin8 PE=1 SV=1	4	16.2153	7.51306		0.871252	0.952645		-1.10988		0.00244555
sp|Q9R0Q6|ARC1A_MOUSE	Arpc1a	Actin-related protein 2/3 complex subunit 1A OS=Mus musculus GN=Arpc1a PE=1 SV=1	8	10.6092	15.5211		0.211642	0.693569		0.548916		0.00244836
sp|Q8R0L9|TADA3_MOUSE	Tada3	Transcriptional adapter 3 OS=Mus musculus GN=Tada3 PE=1 SV=1	7	15.0548	9.36584		0.626343	0.565476		-0.684747		0.00244906
sp|Q60862|ORC2_MOUSE	Orc2	Origin recognition complex subunit 2 OS=Mus musculus GN=Orc2 PE=1 SV=1	6	15.5065	5.95821		1.22983	0.696696		-1.37992		0.00244959
sp|P97355|SPSY_MOUSE	Sms	Spermine synthase OS=Mus musculus GN=Sms PE=1 SV=1	8	17.6947	5.97751		0.589138	1.63062		-1.5657		0.00245042
sp|Q8C1S0|MED19_MOUSE	Med19	Mediator of RNA polymerase II transcription subunit 19 OS=Mus musculus GN=Med19 PE=1 SV=1	2	16.0484	7.17518		1.18549	0.576975		-1.16135		0.00245099
sp|P07091|S10A4_MOUSE	S100a4	Protein S100-A4 OS=Mus musculus GN=S100a4 PE=1 SV=1	7	21.6625	3.36814		2.4586	1.11749		-2.68517		0.00245286
sp|Q99LS3|SERB_MOUSE	Psph	Phosphoserine phosphatase OS=Mus musculus GN=Psph PE=1 SV=1	11	11.8181	4.26339		0.710289	0.862072		-1.47092		0.002453
sp|P40201|CHD1_MOUSE	Chd1	Chromodomain-helicase-DNA-binding protein 1 OS=Mus musculus GN=Chd1 PE=1 SV=3	23	16.9665	7.88913		0.869406	1.02343		-1.10475		0.00245324
sp|Q8VDZ4|ZDHC5_MOUSE	Zdhhc5	Probable palmitoyltransferase ZDHHC5 OS=Mus musculus GN=Zdhhc5 PE=1 SV=1	7	10.5266	15.5291		0.126561	0.731126		0.560932		0.00245384
sp|Q9CQT2|RBM7_MOUSE	Rbm7	RNA-binding protein 7 OS=Mus musculus GN=Rbm7 PE=1 SV=1	5	15.2659	8.40882		0.800537	0.618943		-0.860341		0.00245449
sp|Q8R502|LRC8C_MOUSE	Lrrc8c	Leucine-rich repeat-containing protein 8C OS=Mus musculus GN=Lrrc8c PE=1 SV=1	15	16.5951	5.72039		0.597227	1.50435		-1.53657		0.00245742
sp|Q9CWN7|CB029_MOUSE	D1Bwg0212e	UPF0760 protein C2orf29 homolog OS=Mus musculus GN=D1Bwg0212e PE=2 SV=1	7	15.2561	8.8013		0.512497	0.812564		-0.7936		0.00246197
sp|P97360|ETV6_MOUSE	Etv6	Transcription factor ETV6 OS=Mus musculus GN=Etv6 PE=1 SV=1	8	15.41	8.63576		0.538247	0.85695		-0.835475		0.00246357
sp|Q91YM4-2|TBRG4_MOUSE	Tbrg4	Isoform 2 of Protein TBRG4 OS=Mus musculus GN=Tbrg4	12	14.2438	7.0171		0.693182	0.82635		-1.02139		0.00246467
sp|P47738|ALDH2_MOUSE	Aldh2	Aldehyde dehydrogenase, mitochondrial OS=Mus musculus GN=Aldh2 PE=1 SV=1	48	7.80255	16.1334		0.813296	0.939749		1.04803		0.00246511
sp|Q3U155|CC019_MOUSE		Uncharacterized protein C3orf19 homolog OS=Mus musculus PE=2 SV=1	4	16.3723	7.45616		0.812206	1.05528		-1.13475		0.00246643
sp|Q62383|SPT6H_MOUSE	Supt6h	Transcription elongation factor SPT6 OS=Mus musculus GN=Supt6h PE=1 SV=2	37	14.9858	8.53451		0.558054	0.783852		-0.812212		0.00246794
sp|Q80ZW2|CH055_MOUSE		UPF0670 protein C8orf55 homolog OS=Mus musculus PE=2 SV=1	2	18.9482	1.99893		2.41767	0.737803		-3.24477		0.00247184
sp|Q9CQE3|RT17_MOUSE	Mrps17	28S ribosomal protein S17, mitochondrial OS=Mus musculus GN=Mrps17 PE=2 SV=1	2	16.2773	5.7933		0.834059	1.33064		-1.4904		0.00247551
sp|Q61584-3|FXR1_MOUSE	Fxr1	Isoform B of Fragile X mental retardation syndrome-related protein 1 OS=Mus musculus GN=Fxr1	34	16.2092	7.88746		0.197039	1.22962		-1.03918		0.0024756
sp|Q6VVW5|ANPRB_MOUSE	Npr2	Atrial natriuretic peptide receptor 2 OS=Mus musculus GN=Npr2 PE=2 SV=2	17	6.79694	24.3458		1.01412	2.42388		1.84071		0.00247583
sp|Q5DU41|LRC8B_MOUSE	Lrrc8b	Leucine-rich repeat-containing protein 8B OS=Mus musculus GN=Lrrc8b PE=2 SV=2	1	18.418	6.62613		1.56706	0.837789		-1.47488		0.0024763
sp|Q8R322|GLE1_MOUSE	Gle1	Nucleoporin GLE1 OS=Mus musculus GN=Gle1 PE=2 SV=2	2	15.7647	7.36115		0.906756	0.885788		-1.0987		0.00247634
sp|P36895|BMR1A_MOUSE	Bmpr1a	Bone morphogenetic protein receptor type-1A OS=Mus musculus GN=Bmpr1a PE=1 SV=1	3	9.27252	16.4141		0.707158	0.8121		0.823902		0.00247738
sp|Q9R1X4-2|TIM_MOUSE	Timeless	Isoform 2 of Protein timeless homolog OS=Mus musculus GN=Timeless	3	19.5294	4.6669		2.10308	0.73906		-2.06511		0.00247834
sp|Q3UHC7-2|DAB2P_MOUSE	Dab2ip	Isoform 2 of Disabled homolog 2-interacting protein OS=Mus musculus GN=Dab2ip	17	9.67731	16.3451		0.770528	0.640743		0.75618		0.00247905
sp|Q8VEJ1|GPN2_MOUSE	Gpn2	GPN-loop GTPase 2 OS=Mus musculus GN=Gpn2 PE=2 SV=2	1	14.955	9.13617		0.589966	0.648505		-0.710964		0.00247937
sp|Q91V12|BACH_MOUSE	Acot7	Cytosolic acyl coenzyme A thioester hydrolase OS=Mus musculus GN=Acot7 PE=1 SV=2	17	16.3356	9.76389		0.330401	0.932545		-0.742488		0.00248104
sp|Q8BTW3|EXOS6_MOUSE	Exosc6	Exosome complex component MTR3 OS=Mus musculus GN=Exosc6 PE=1 SV=1	8	16.8425	7.05424		1.33641	0.606967		-1.25554		0.00248108
sp|Q9QWV9|CCNT1_MOUSE	Ccnt1	Cyclin-T1 OS=Mus musculus GN=Ccnt1 PE=1 SV=2	8	14.8188	7.69799		0.688072	0.819528		-0.944878		0.00248253
sp|Q923U0|TM1L1_MOUSE	Tom1l1	TOM1-like protein 1 OS=Mus musculus GN=Tom1l1 PE=1 SV=1	3	18.3175	5.45472		1.87438	0.480073		-1.74765		0.0024827
sp|Q99KV1|DJB11_MOUSE	Dnajb11	DnaJ homolog subfamily B member 11 OS=Mus musculus GN=Dnajb11 PE=1 SV=1	18	9.43558	18.0231		0.913288	0.916484		0.933661		0.00248398
sp|Q9DBY0-2|FOXP4_MOUSE	Foxp4	Isoform 2 of Forkhead box protein P4 OS=Mus musculus GN=Foxp4	3	19.3212	6.74285		1.67064	0.904966		-1.51875		0.00248525
sp|Q9CU62|SMC1A_MOUSE	Smc1a	Structural maintenance of chromosomes protein 1A OS=Mus musculus GN=Smc1a PE=1 SV=4	70	17.4962	8.33462		0.67197	1.20444		-1.06985		0.0024855
sp|Q91ZX6-2|SENP2_MOUSE	Senp2	Isoform 2 of Sentrin-specific protease 2 OS=Mus musculus GN=Senp2	2	15.8247	8.5086		0.62576	0.903072		-0.895188		0.00248561
sp|O88456|CPNS1_MOUSE	Capns1	Calpain small subunit 1 OS=Mus musculus GN=Capns1 PE=2 SV=1	16	7.97502	18.8038		1.12178	1.17877		1.23746		0.00248704
sp|Q64261|CDK6_MOUSE	Cdk6	Cyclin-dependent kinase 6 OS=Mus musculus GN=Cdk6 PE=2 SV=2	7	16.7098	5.94751		1.32933	0.943992		-1.49034		0.00249935
sp|Q9CRC3|CO040_MOUSE		UPF0235 protein C15orf40 homolog OS=Mus musculus PE=2 SV=1	1	9.25059	17.0848		0.29827	1.14827		0.885097		0.0025004
sp|O89050|MKLN1_MOUSE	Mkln1	Muskelin OS=Mus musculus GN=Mkln1 PE=2 SV=1	19	14.6276	8.36697		0.854722	0.40936		-0.805915		0.00250115
tr|F6ZFU0|F6ZFU0_MOUSE	Eef1d	Uncharacterized protein (Fragment) OS=Mus musculus GN=Eef1d PE=4 SV=1	56	13.3369	10.0625		0.320864	0.379492		-0.406442		0.00250773
sp|P48193|41_MOUSE	Epb41	Protein 4.1 OS=Mus musculus GN=Epb41 PE=1 SV=2	17	17.9429	7.78614		1.08064	1.09828		-1.20443		0.00250804
sp|B2RY04|DOCK5_MOUSE	Dock5	Dedicator of cytokinesis protein 5 OS=Mus musculus GN=Dock5 PE=1 SV=2	20	8.90811	15.0989		0.743435	0.575432		0.761255		0.00250873
sp|Q9EQG3|SCEL_MOUSE	Scel	Sciellin OS=Mus musculus GN=Scel PE=1 SV=2	5	6.85786	23.3285		1.25374	2.16736		1.76626		0.00251456
sp|Q6PR54-3|RIF1_MOUSE	Rif1	Isoform 3 of Telomere-associated protein RIF1 OS=Mus musculus GN=Rif1	32	16.3846	6.60129		0.59669	1.36663		-1.31152		0.00253131
sp|Q9CXZ1|NDUS4_MOUSE	Ndufs4	NADH dehydrogenase [ubiquinone] iron-sulfur protein 4, mitochondrial OS=Mus musculus GN=Ndufs4 PE=1 SV=3	8	6.89603	18.9432		0.783596	1.66054		1.45784		0.00253528
sp|P18653|KS6A1_MOUSE	Rps6ka1	Ribosomal protein S6 kinase alpha-1 OS=Mus musculus GN=Rps6ka1 PE=1 SV=1	17	17.9585	7.38928		0.905788	1.33984		-1.28116		0.00256522
sp|Q8BH74|NU107_MOUSE	Nup107	Nuclear pore complex protein Nup107 OS=Mus musculus GN=Nup107 PE=2 SV=1	29	14.5952	8.91794		0.856629	0.153456		-0.710714		0.00257343
sp|Q9CSB4-2|PAR3L_MOUSE	Pard3b	Isoform 2 of Partitioning defective 3 homolog B OS=Mus musculus GN=Pard3b	2	6.03319	23.1945		1.08746	2.3945		1.94279		0.00257528
sp|O88811-2|STAM2_MOUSE	Stam2	Isoform 2 of Signal transducing adapter molecule 2 OS=Mus musculus GN=Stam2	14	9.99964	15.181		0.752757	0.256156		0.602316		0.00258014
sp|Q8R2K4|TAF6L_MOUSE	Taf6l	TAF6-like RNA polymerase II p300/CBP-associated factor-associated factor 65 kDa subunit 6L OS=Mus musculus GN=Taf6l PE=2 SV=1	5	16.954	7.76437		0.995883	1.00866		-1.12668		0.00261724
sp|Q62311|TAF6_MOUSE	Taf6	Transcription initiation factor TFIID subunit 6 OS=Mus musculus GN=Taf6 PE=2 SV=1	8	15.3512	8.49882		0.378168	0.98598		-0.85302		0.0026178
sp|Q9D3E6|STAG1_MOUSE	Stag1	Cohesin subunit SA-1 OS=Mus musculus GN=Stag1 PE=1 SV=3	15	16.7564	8.04183		0.762036	1.10693		-1.05912		0.00261967
tr|F7BTS7|F7BTS7_MOUSE		Uncharacterized protein (Fragment) OS=Mus musculus PE=4 SV=1	1	11.3499	15.5496		0.238963	0.603224		0.454202		0.00262406
tr|Q3TQS1|Q3TQS1_MOUSE	Larp1b	Uncharacterized protein OS=Mus musculus GN=Larp1b PE=2 SV=1	1	18.2395	3.57773		2.22789	0.479877		-2.34995		0.00262469
sp|Q8CEC6|PPWD1_MOUSE	Ppwd1	Peptidylprolyl isomerase domain and WD repeat-containing protein 1 OS=Mus musculus GN=Ppwd1 PE=2 SV=2	14	17.43	8.88806		0.759322	1.07895		-0.971634		0.00262635
tr|E9Q6E5|E9Q6E5_MOUSE	Srsf11	Uncharacterized protein OS=Mus musculus GN=Srsf11 PE=4 SV=1	15	15.7318	9.36878		0.536019	0.831159		-0.747747		0.00262903
sp|Q99PP7|TRI33_MOUSE	Trim33	E3 ubiquitin-protein ligase TRIM33 OS=Mus musculus GN=Trim33 PE=2 SV=2	13	17.47	6.21958		1.67476	0.497841		-1.48999		0.00262972
sp|Q68ED3|PAPD5_MOUSE	Papd5	PAP-associated domain-containing protein 5 OS=Mus musculus GN=Papd5 PE=2 SV=2	4	15.9451	8.80847		0.903817	0.642799		-0.856153		0.0026321
sp|O89016|ABCD4_MOUSE	Abcd4	ATP-binding cassette sub-family D member 4 OS=Mus musculus GN=Abcd4 PE=2 SV=2	3	4.0639	20.1634		0.693486	2.40184		2.3108		0.00263325
sp|Q922V4|PLRG1_MOUSE	Plrg1	Pleiotropic regulator 1 OS=Mus musculus GN=Plrg1 PE=2 SV=1	21	15.1394	9.43585		0.484515	0.738497		-0.682087		0.00263387
sp|P48024|EIF1_MOUSE	Eif1	Eukaryotic translation initiation factor 1 OS=Mus musculus GN=Eif1 PE=2 SV=2	8	14.1299	8.51327		0.477665	0.726472		-0.730969		0.00263453
sp|Q3UGP9|LRC58_MOUSE	Lrrc58	Leucine-rich repeat-containing protein 58 OS=Mus musculus GN=Lrrc58 PE=2 SV=1	7	2.96936	29.9671		0.928914	4.08726		3.33515		0.00263615
sp|O35071|KIF1C_MOUSE	Kif1c	Kinesin-like protein KIF1C OS=Mus musculus GN=Kif1c PE=1 SV=2	25	9.18509	17.0899		0.426233	1.14862		0.895776		0.00263774
sp|Q6PB97-2|FXL19_MOUSE	Fbxl19	Isoform 2 of F-box/LRR-repeat protein 19 OS=Mus musculus GN=Fbxl19	1	14.6953	8.84069		0.565821	0.707817		-0.733124		0.00263825
sp|A6PWY4-2|WDR76_MOUSE	Wdr76	Isoform 2 of WD repeat-containing protein 76 OS=Mus musculus GN=Wdr76	2	17.6222	7.87425		0.797793	1.28508		-1.16218		0.00264009
tr|Q3UKR0|Q3UKR0_MOUSE	Daxx	Fas death domain-associated protein OS=Mus musculus GN=Daxx PE=2 SV=1	4	15.5884	7.2393		1.21081	0.462523		-1.10655		0.00264022
sp|Q69ZP3-3|PNKD_MOUSE	Pnkd	Isoform 3 of Probable hydrolase PNKD OS=Mus musculus GN=Pnkd	3	19.0298	5.54756		1.81037	1.04694		-1.77834		0.00264124
sp|Q3TUU5|CM027_MOUSE		Uncharacterized protein C13orf27 homolog OS=Mus musculus PE=2 SV=1	5	20.433	4.57159		2.3566	0.753647		-2.16013		0.00265159
sp|O88874|CCNK_MOUSE	Ccnk	Cyclin-K OS=Mus musculus GN=Ccnk PE=1 SV=3	4	13.9097	9.42114		0.56132	0.418062		-0.562122		0.00265237
sp|Q9D0N7|CAF1B_MOUSE	Chaf1b	Chromatin assembly factor 1 subunit B OS=Mus musculus GN=Chaf1b PE=2 SV=1	19	18.0985	7.19148		1.05872	1.33773		-1.33151		0.00265619
sp|Q8K330-2|SSH3_MOUSE	Ssh3	Isoform 2 of Protein phosphatase Slingshot homolog 3 OS=Mus musculus GN=Ssh3	5	4.71958	27.0968		0.706248	3.42711		2.52139		0.00265809
sp|Q6DID5|MUM1_MOUSE	Mum1	PWWP domain-containing protein MUM1 OS=Mus musculus GN=Mum1 PE=2 SV=1	3	17.781	8.62614		1.33464	0.516185		-1.04355		0.00265875
sp|Q2VPQ9-2|EAF6_MOUSE	Meaf6	Isoform 2 of Chromatin modification-related protein MEAF6 OS=Mus musculus GN=Meaf6	6	16.9399	7.50827		0.90153	1.165		-1.17387		0.00266004
sp|Q8BGD5|CPT1C_MOUSE	Cpt1c	Carnitine O-palmitoyltransferase 1, brain isoform OS=Mus musculus GN=Cpt1c PE=2 SV=1	5	4.98868	20.9396		0.221511	2.48292		2.06951		0.0026614
tr|A2ANY6|A2ANY6_MOUSE	Mdn1	Midasin OS=Mus musculus GN=Mdn1 PE=3 SV=1	87	15.4528	7.9		0.973639	0.672271		-0.967941		0.00266293
sp|O35473|C1D_MOUSE	C1d	Nuclear nucleic acid-binding protein C1D OS=Mus musculus GN=C1d PE=1 SV=1	1	17.2905	5.64108		1.2786	1.30183		-1.61594		0.00266629
sp|P60867|RS20_MOUSE	Rps20	40S ribosomal protein S20 OS=Mus musculus GN=Rps20 PE=1 SV=1	11	12.7452	10.1711		0.195313	0.353363		-0.325468		0.00267147
sp|Q60932-2|VDAC1_MOUSE	Vdac1	Isoform Mt-VDAC1 of Voltage-dependent anion-selective channel protein 1 OS=Mus musculus GN=Vdac1	63	9.95462	16.4096		0.450138	0.910165		0.721099		0.00267792
sp|O88343-2|S4A4_MOUSE	Slc4a4	Isoform 2 of Electrogenic sodium bicarbonate cotransporter 1 OS=Mus musculus GN=Slc4a4	8	3.69329	25.4614		1.00284	3.2679		2.78533		0.00267858
sp|Q8C761|WDR60_MOUSE	Wdr60	WD repeat-containing protein 60 OS=Mus musculus GN=Wdr60 PE=2 SV=1	2	7.84224	16.4049		0.508089	1.24724		1.06479		0.0026812
sp|Q9CPW3|RM54_MOUSE	Mrpl54	39S ribosomal protein L54, mitochondrial OS=Mus musculus GN=Mrpl54 PE=2 SV=1	4	14.7378	9.37083		0.386652	0.750084		-0.653272		0.00268264
sp|Q8R5K4-2|NOL6_MOUSE	Nol6	Isoform 2 of Nucleolar protein 6 OS=Mus musculus GN=Nol6	14	15.4452	6.74475		1.20684	0.643671		-1.19532		0.00268543
sp|Q8K4G5-2|ABLM1_MOUSE	Ablim1	Isoform 2 of Actin-binding LIM protein 1 OS=Mus musculus GN=Ablim1	14	8.73158	19.1844		0.962409	1.33569		1.13562		0.00268607
sp|Q8CIM3|D2HDH_MOUSE	D2hgdh	D-2-hydroxyglutarate dehydrogenase, mitochondrial OS=Mus musculus GN=D2hgdh PE=2 SV=2	1	6.89352	16.5841		1.0184	1.14262		1.26648		0.0026973
sp|Q8BFY9-2|TNPO1_MOUSE	Tnpo1	Isoform 2 of Transportin-1 OS=Mus musculus GN=Tnpo1	31	14.4425	10.3166		0.380988	0.528344		-0.485347		0.00269735
sp|Q60520-1|SIN3A_MOUSE	Sin3a	Isoform 2 of Paired amphipathic helix protein Sin3a OS=Mus musculus GN=Sin3a	16	15.9957	8.43172		0.464086	1.09941		-0.923785		0.00269929
sp|Q9DCX1|MD2BP_MOUSE	Mad2l1bp	MAD2L1-binding protein OS=Mus musculus GN=Mad2l1bp PE=2 SV=2	1	16.3874	6.8094		1.44575	0.449442		-1.26698		0.00270086
sp|P20152|VIME_MOUSE	Vim	Vimentin OS=Mus musculus GN=Vim PE=1 SV=3	314	8.16166	18.0854		1.05414	1.15905		1.14789		0.00270193
tr|Q9JIA6|Q9JIA6_MOUSE	Galk1	Galactokinase OS=Mus musculus GN=Galk1 PE=2 SV=1	21	7.82957	18.2199		0.964785	1.33194		1.21851		0.00271054
sp|Q8BQN5|FA78B_MOUSE	Fam78b	Protein FAM78B OS=Mus musculus GN=Fam78b PE=2 SV=2	1	14.4227	8.59736		0.65003	0.656816		-0.746376		0.00271972
sp|Q9D0Q7|RM45_MOUSE	Mrpl45	39S ribosomal protein L45, mitochondrial OS=Mus musculus GN=Mrpl45 PE=2 SV=1	10	14.2801	9.48605		0.446694	0.614929		-0.59013		0.00272275
sp|Q99J95|CDK9_MOUSE	Cdk9	Cyclin-dependent kinase 9 OS=Mus musculus GN=Cdk9 PE=1 SV=1	9	14.9426	7.28473		1.13764	0.42576		-1.03648		0.00272359
sp|Q8CG03|PDE5A_MOUSE	Pde5a	cGMP-specific 3',5'-cyclic phosphodiesterase OS=Mus musculus GN=Pde5a PE=1 SV=2	9	1.99199	27.7771		0.585774	4.05338		3.80162		0.00272369
sp|Q9JKC8|AP3M1_MOUSE	Ap3m1	AP-3 complex subunit mu-1 OS=Mus musculus GN=Ap3m1 PE=1 SV=1	14	9.23443	16.8105		0.820509	0.879842		0.864264		0.00272611
sp|P62071|RRAS2_MOUSE	Rras2	Ras-related protein R-Ras2 OS=Mus musculus GN=Rras2 PE=1 SV=1	13	10.3607	16.616		0.325177	0.94094		0.681449		0.00272661
sp|Q9D1R2|KTI12_MOUSE	Kti12	Protein KTI12 homolog OS=Mus musculus GN=Kti12 PE=1 SV=1	6	16.1801	7.62375		0.958533	0.964806		-1.08565		0.00272677
sp|P70665|SIAE_MOUSE	Siae	Sialate O-acetylesterase OS=Mus musculus GN=Siae PE=2 SV=3	3	7.0804	22.1171		1.15615	2.09308		1.64326		0.00272712
sp|Q8R3Q6|CCD58_MOUSE	Ccdc58	Coiled-coil domain-containing protein 58 OS=Mus musculus GN=Ccdc58 PE=2 SV=1	3	13.9844	7.25789		0.316669	1.02359		-0.946196		0.00273101
sp|Q9CUX1|P52K_MOUSE	Prkrir	52 kDa repressor of the inhibitor of the protein kinase OS=Mus musculus GN=Prkrir PE=2 SV=2	3	16.6642	7.09719		0.692563	1.35597		-1.23143		0.00273113
sp|Q8BJS8-2|MTBP_MOUSE	Mtbp	Isoform 2 of Mdm2-binding protein OS=Mus musculus GN=Mtbp	3	15.2387	6.44915		0.700923	1.21447		-1.24056		0.00274276
sp|Q8VEK6|ING3_MOUSE	Ing3	Inhibitor of growth protein 3 OS=Mus musculus GN=Ing3 PE=2 SV=2	2	16.7133	7.45262		0.485997	1.3975		-1.16518		0.00274945
tr|Q8K1M3|Q8K1M3_MOUSE	Prkar2a	Protein kinase, cAMP dependent regulatory, type II alpha OS=Mus musculus GN=Prkar2a PE=2 SV=1	11	12.9226	9.837		0.463357	0.168105		-0.393602		0.00275243
sp|Q99J31|OPHN1_MOUSE	Ophn1	Oligophrenin-1 OS=Mus musculus GN=Ophn1 PE=2 SV=1	2	7.55641	17.2777		0.930046	1.24618		1.19314		0.00275717
sp|Q8BG79|C19L2_MOUSE	Cwf19l2	CWF19-like protein 2 OS=Mus musculus GN=Cwf19l2 PE=2 SV=1	6	15.5872	8.13415		0.797586	0.887115		-0.938298		0.00275963
sp|Q91WZ8|DTBP1_MOUSE	Dtnbp1	Dysbindin OS=Mus musculus GN=Dtnbp1 PE=1 SV=1	6	10.1796	16.4593		0.643118	0.774463		0.693221		0.00277148
sp|Q9JJI6|PIGO_MOUSE	Pigo	GPI ethanolamine phosphate transferase 3 OS=Mus musculus GN=Pigo PE=1 SV=2	2	9.48105	17.5204		0.74127	1.05567		0.885917		0.00277661
tr|E9Q512|E9Q512_MOUSE	Trip11	Uncharacterized protein OS=Mus musculus GN=Trip11 PE=4 SV=1	50	8.26557	18.3589		0.399983	1.57083		1.1513		0.00278169
sp|Q3UPP8-3|CEP63_MOUSE	Cep63	Isoform 3 of Centrosomal protein of 63 kDa OS=Mus musculus GN=Cep63	1	16.3984	8.45607		0.42916	1.20268		-0.955493		0.00278936
sp|Q7JJ13|BRD2_MOUSE	Brd2	Bromodomain-containing protein 2 OS=Mus musculus GN=Brd2 PE=1 SV=1	14	17.563	7.58743		1.48354	0.620049		-1.21085		0.00281216
sp|Q8VIJ6|SFPQ_MOUSE	Sfpq	Splicing factor, proline- and glutamine-rich OS=Mus musculus GN=Sfpq PE=1 SV=1	42	15.9662	8.57136		0.131561	1.18519		-0.897423		0.00281248
sp|Q91YR7|PRP6_MOUSE	Prpf6	Pre-mRNA-processing factor 6 OS=Mus musculus GN=Prpf6 PE=2 SV=1	33	14.2527	9.13895		0.818872	0.102484		-0.641131		0.00281621
sp|Q9DBG3-2|AP2B1_MOUSE	Ap2b1	Isoform 2 of AP-2 complex subunit beta OS=Mus musculus GN=Ap2b1	32	9.92242	16.6441		0.80121	0.734533		0.746244		0.00281986
sp|Q8CGY8|OGT1_MOUSE	Ogt	UDP-N-acetylglucosamine--peptide N-acetylglucosaminyltransferase 110 kDa subunit OS=Mus musculus GN=Ogt PE=1 SV=2	23	15.5838	9.9307		0.242083	0.882833		-0.650083		0.00282102
sp|O35280-2|CHK1_MOUSE	Chek1	Isoform 2 of Serine/threonine-protein kinase Chk1 OS=Mus musculus GN=Chek1	6	19.5313	6.73643		1.46343	1.45945		-1.53573		0.00282184
sp|Q8R3C0|MCMBP_MOUSE	Mcmbp	Mini-chromosome maintenance complex-binding protein OS=Mus musculus GN=Mcmbp PE=2 SV=1	16	15.0774	8.36958		1.03987	0.311216		-0.849163		0.00282251
sp|Q9JHU2|PALMD_MOUSE	Palmd	Palmdelphin OS=Mus musculus GN=Palmd PE=1 SV=1	5	0.635693	31.5396		0.557427	4.97208		5.63269		0.00282322
sp|Q61553|FSCN1_MOUSE	Fscn1	Fascin OS=Mus musculus GN=Fscn1 PE=1 SV=4	66	10.2135	17.8362		0.922226	0.823248		0.804324		0.00282381
sp|Q9CQ65|MTAP_MOUSE	Mtap	S-methyl-5'-thioadenosine phosphorylase OS=Mus musculus GN=Mtap PE=2 SV=1	29	15.6401	9.12027		0.707385	0.781709		-0.778098		0.00282392
sp|Q922H2|PDK3_MOUSE	Pdk3	[Pyruvate dehydrogenase [lipoamide]] kinase isozyme 3, mitochondrial OS=Mus musculus GN=Pdk3 PE=2 SV=1	13	15.7769	9.38915		0.822946	0.628704		-0.748748		0.00282493
sp|Q9D0A3|CO038_MOUSE		UPF0552 protein C15orf38 homolog OS=Mus musculus PE=2 SV=1	11	10.2475	17.6219		0.998043	0.652006		0.782101		0.00282568
sp|Q6PAT0|ADAT3_MOUSE	Adat3	tRNA-specific adenosine deaminase-like protein 3 OS=Mus musculus GN=Adat3 PE=2 SV=1	1	16.8734	7.1144		1.5604	0.259623		-1.24593		0.00282728
sp|P81122|IRS2_MOUSE	Irs2	Insulin receptor substrate 2 OS=Mus musculus GN=Irs2 PE=1 SV=2	2	21.2751	7.30856		1.40858	1.77757		-1.5415		0.00283352
sp|Q8C0N2|GPAT3_MOUSE	Agpat9	Glycerol-3-phosphate acyltransferase 3 OS=Mus musculus GN=Agpat9 PE=1 SV=1	1	13.1553	7.60675		0.758453	0.489363		-0.790292		0.00284389
sp|Q8CI03-2|FWCH1_MOUSE	Flywch1	Isoform 2 of FLYWCH-type zinc finger-containing protein 1 OS=Mus musculus GN=Flywch1	3	16.7203	5.56551		1.31453	1.26163		-1.58701		0.00284751
sp|Q6NZR2|CK061_MOUSE		Uncharacterized protein C11orf61 homolog OS=Mus musculus PE=1 SV=1	2	15.5465	10.7889		0.193992	0.749883		-0.527042		0.00284808
tr|Q9EQC8|Q9EQC8_MOUSE	Prcc	Papillary renal cell carcinoma (Translocation-associated) OS=Mus musculus GN=Prcc PE=2 SV=1	6	16.0322	8.99236		1.12108	0.253917		-0.834201		0.00284821
tr|Q6PHQ9|Q6PHQ9_MOUSE	Pabpc4	MCG5546, isoform CRA_c OS=Mus musculus GN=Pabpc4 PE=2 SV=1	28	16.6336	8.30038		0.927461	0.988665		-1.00285		0.00284823
sp|Q60575-3|KIF1B_MOUSE	Kif1b	Isoform 3 of Kinesin-like protein KIF1B OS=Mus musculus GN=Kif1b	6	17.5765	7.49855		1.29542	1.02484		-1.22896		0.00284945
sp|Q9Z1Z0|USO1_MOUSE	Uso1	General vesicular transport factor p115 OS=Mus musculus GN=Uso1 PE=1 SV=2	47	10.5723	15.5361		0.70721	0.394283		0.555333		0.00285101
tr|Q91XJ8|Q91XJ8_MOUSE	B2m	Beta-2 microglobulin OS=Mus musculus GN=B2m PE=1 SV=1	8	16.8705	7.73494		1.16872	0.922743		-1.12504		0.00285188
sp|Q8VE22|RT23_MOUSE	Mrps23	28S ribosomal protein S23, mitochondrial OS=Mus musculus GN=Mrps23 PE=2 SV=1	8	14.3202	8.20197		0.739701	0.671312		-0.804006		0.0028519
sp|Q9WU56-2|TRUA_MOUSE	Pus1	Isoform 2 of tRNA pseudouridine synthase A, mitochondrial OS=Mus musculus GN=Pus1	14	15.338	7.18322		0.995706	0.891317		-1.09441		0.00285214
sp|P60487|PLPP_MOUSE	Pdxp	Pyridoxal phosphate phosphatase OS=Mus musculus GN=Pdxp PE=1 SV=1	4	14.7246	5.4246		1.50504	0.196561		-1.44064		0.00285232
tr|E9Q3E2|E9Q3E2_MOUSE	Synpo	Uncharacterized protein OS=Mus musculus GN=Synpo PE=4 SV=1	30	7.28751	22.9672		0.555048	2.49392		1.65607		0.00285298
sp|Q8C4Y3|NELFB_MOUSE	Cobra1	Negative elongation factor B OS=Mus musculus GN=Cobra1 PE=2 SV=2	9	15.4257	7.72561		1.09109	0.621857		-0.997615		0.00285397
sp|O08664|BCL7C_MOUSE	Bcl7c	B-cell CLL/lymphoma 7 protein family member C OS=Mus musculus GN=Bcl7c PE=1 SV=1	4	16.8875	7.25479		1.34523	0.821595		-1.21895		0.00285421
sp|P61759|PFD3_MOUSE	Vbp1	Prefoldin subunit 3 OS=Mus musculus GN=Vbp1 PE=2 SV=2	11	16.2014	8.00601		0.871049	1.02117		-1.01696		0.00285448
sp|Q6KCD5|NIPBL_MOUSE	Nipbl	Nipped-B-like protein OS=Mus musculus GN=Nipbl PE=1 SV=1	25	16.3354	7.96675		0.544397	1.25726		-1.03594		0.00285479
sp|O35691|PININ_MOUSE	Pnn	Pinin OS=Mus musculus GN=Pnn PE=1 SV=4	26	15.5655	9.04741		0.0818572	1.06309		-0.782772		0.00285493
sp|Q9CZ96-2|ZCRB1_MOUSE	Zcrb1	Isoform 2 of Zinc finger CCHC-type and RNA-binding motif-containing protein 1 OS=Mus musculus GN=Zcrb1	3	15.8099	6.05341		1.42468	0.729755		-1.38501		0.00285606
sp|Q8BIP0|SYDM_MOUSE	Dars2	Aspartyl-tRNA synthetase, mitochondrial OS=Mus musculus GN=Dars2 PE=2 SV=1	8	5.8471	17.5307		0.477249	1.85419		1.58409		0.00285657
sp|Q6P4S8|INT1_MOUSE	Ints1	Integrator complex subunit 1 OS=Mus musculus GN=Ints1 PE=1 SV=2	29	14.3064	9.49082		0.545425	0.568224		-0.592056		0.00285798
sp|Q8BMK0|CEP85_MOUSE	Cep85	Centrosomal protein of 85 kDa OS=Mus musculus GN=Cep85 PE=2 SV=2	4	13.7001	10.1106		0.412459	0.421895		-0.438314		0.00287243
sp|P70270|RAD54_MOUSE	Rad54l	DNA repair and recombination protein RAD54-like OS=Mus musculus GN=Rad54l PE=1 SV=2	1	19.098	4.78224		2.02287	1.20527		-1.99766		0.00287542
sp|O09131|GSTO1_MOUSE	Gsto1	Glutathione S-transferase omega-1 OS=Mus musculus GN=Gsto1 PE=2 SV=2	24	12.4709	5.34353		0.905098	0.765611		-1.2227		0.0028762
tr|Q5NCB2|Q5NCB2_MOUSE	Gm12185	Novel interferon-inducible GTPase (IIGP) family member OS=Mus musculus GN=Gm12185 PE=2 SV=1	4	2.86638	22.2877		0.532796	3.18525		2.95894		0.00287772
sp|Q8BTT6|DIEXF_MOUSE	Diexf	Digestive organ expansion factor homolog OS=Mus musculus GN=Diexf PE=2 SV=2	11	15.2078	7.765		0.930147	0.815331		-0.969754		0.00287977
sp|Q6PEE2|CTIF_MOUSE	Ctif	CBP80/20-dependent translation initiation factor OS=Mus musculus GN=Ctif PE=1 SV=2	5	7.83423	17.4327		0.657549	1.45407		1.15394		0.00288015
sp|Q3UHJ0-2|AAK1_MOUSE	Aak1	Isoform 2 of AP2-associated protein kinase 1 OS=Mus musculus GN=Aak1	23	10.9348	15.6288		0.461095	0.628576		0.515283		0.00288086
sp|Q80TN4|DJC16_MOUSE	Dnajc16	DnaJ homolog subfamily C member 16 OS=Mus musculus GN=Dnajc16 PE=1 SV=2	5	17.4746	9.50516		0.493155	1.2278		-0.878473		0.002882
sp|Q3UYV9|NCBP1_MOUSE	Ncbp1	Nuclear cap-binding protein subunit 1 OS=Mus musculus GN=Ncbp1 PE=1 SV=2	18	18.3036	7.05404		1.75088	0.615916		-1.37561		0.00288261
sp|Q8K3X4|I2BPL_MOUSE	Irf2bpl	Interferon regulatory factor 2-binding protein-like OS=Mus musculus GN=Irf2bpl PE=1 SV=1	6	15.9196	5.68561		0.882755	1.44019		-1.48541		0.00288292
sp|Q99JB2|STML2_MOUSE	Stoml2	Stomatin-like protein 2 OS=Mus musculus GN=Stoml2 PE=1 SV=1	8	16.3106	8.1132		0.822573	1.08586		-1.00747		0.00288358
sp|Q3UPL0|SC31A_MOUSE	Sec31a	Protein transport protein Sec31A OS=Mus musculus GN=Sec31a PE=1 SV=2	62	10.5082	15.773		0.643761	0.591		0.585938		0.00288392
sp|P70697|DCUP_MOUSE	Urod	Uroporphyrinogen decarboxylase OS=Mus musculus GN=Urod PE=1 SV=2	8	16.0332	8.94679		0.729462	0.922417		-0.841618		0.00288569
sp|Q8VE65|TAF12_MOUSE	Taf12	Transcription initiation factor TFIID subunit 12 OS=Mus musculus GN=Taf12 PE=1 SV=1	3	17.0826	7.57031		1.33314	0.826747		-1.1741		0.0028864
sp|Q80U44|ZFY16_MOUSE	Zfyve16	Zinc finger FYVE domain-containing protein 16 OS=Mus musculus GN=Zfyve16 PE=1 SV=2	19	11.0047	13.9148		0.219033	0.42724		0.338496		0.00288681
sp|Q80XI3-2|IF4G3_MOUSE	Eif4g3	Isoform 2 of Eukaryotic translation initiation factor 4 gamma 3 OS=Mus musculus GN=Eif4g3	19	8.72922	18.5512		1.23942	1.05839		1.08759		0.00288907
sp|Q9CQJ7-2|PTTG1_MOUSE	Pttg1	Isoform 2 of Securin OS=Mus musculus GN=Pttg1	2	16.091	4.98149		1.42878	1.16147		-1.6916		0.00288915
sp|Q9CR56|KBRS2_MOUSE	Nkiras2	NF-kappa-B inhibitor-interacting Ras-like protein 2 OS=Mus musculus GN=Nkiras2 PE=2 SV=1	1	10.5373	16.3066		0.555469	0.772375		0.629952		0.00289029
tr|E9PXE5|E9PXE5_MOUSE	Dst	Uncharacterized protein OS=Mus musculus GN=Dst PE=4 SV=1	3	13.7802	8.09771		0.639595	0.692022		-0.767014		0.00289058
tr|E9QAH1|E9QAH1_MOUSE	Golgb1	Uncharacterized protein OS=Mus musculus GN=Golgb1 PE=4 SV=1	111	9.42689	17.4314		0.456066	1.24731		0.886831		0.00289212
sp|Q5SWW4|MED13_MOUSE	Med13	Mediator of RNA polymerase II transcription subunit 13 OS=Mus musculus GN=Med13 PE=2 SV=1	6	14.1406	9.18286		0.70756	0.417733		-0.622831		0.00289301
sp|O08901|BUB1_MOUSE	Bub1	Mitotic checkpoint serine/threonine-protein kinase BUB1 OS=Mus musculus GN=Bub1 PE=2 SV=1	3	15.8826	8.528		0.836226	0.878263		-0.897165		0.00289392
tr|E9Q8G3|E9Q8G3_MOUSE	Srcap	Uncharacterized protein OS=Mus musculus GN=Srcap PE=4 SV=1	5	16.9007	7.59855		0.338777	1.50389		-1.15329		0.00289667
sp|Q8BGD9|IF4B_MOUSE	Eif4b	Eukaryotic translation initiation factor 4B OS=Mus musculus GN=Eif4b PE=1 SV=1	46	13.8316	7.63659		0.242251	0.992243		-0.856964		0.00289736
sp|Q6P5D8|SMHD1_MOUSE	Smchd1	Structural maintenance of chromosomes flexible hinge domain-containing protein 1 OS=Mus musculus GN=Smchd1 PE=2 SV=2	79	16.3109	8.28331		0.67705	1.145		-0.977557		0.00289982
sp|Q9D2L9|F111A_MOUSE	Fam111a	Protein FAM111A OS=Mus musculus GN=Fam111a PE=2 SV=1	7	20.7261	7.45267		1.88175	1.17187		-1.47562		0.00290048
tr|E9PV03|E9PV03_MOUSE	Nbeal1	Uncharacterized protein OS=Mus musculus GN=Nbeal1 PE=4 SV=1	13	7.34427	20.6929		0.479829	2.15891		1.49445		0.00290266
tr|Q3TMP1|Q3TMP1_MOUSE	Gtf3c3	General transcription factor IIIC, polypeptide 3 OS=Mus musculus GN=Gtf3c3 PE=2 SV=1	7	14.5817	9.43857		0.230878	0.827231		-0.627522		0.00290322
sp|Q5HZJ0|RNC_MOUSE	Drosha	Ribonuclease 3 OS=Mus musculus GN=Drosha PE=1 SV=1	6	15.3991	7.53002		0.857851	0.981535		-1.03212		0.0029057
sp|Q921W4|QORL1_MOUSE	Cryzl1	Quinone oxidoreductase-like protein 1 OS=Mus musculus GN=Cryzl1 PE=2 SV=1	9	7.48808	16.7259		0.431101	1.48095		1.15941		0.00290626
sp|Q6F3F9|GP126_MOUSE	Gpr126	G-protein coupled receptor 126 OS=Mus musculus GN=Gpr126 PE=1 SV=1	7	7.38983	24.2268		1.77805	2.14627		1.71299		0.00290631
sp|Q8C551|R51A1_MOUSE	Rad51ap1	RAD51-associated protein 1 OS=Mus musculus GN=Rad51ap1 PE=1 SV=2	1	17.677	9.56851		0.632144	1.18488		-0.885507		0.00290787
sp|O35103|OMD_MOUSE	Omd	Osteomodulin OS=Mus musculus GN=Omd PE=2 SV=1	4	3.98957	25.3287		1.52688	3.21831		2.66647		0.00290802
sp|Q8BH44|COR2B_MOUSE	Coro2b	Coronin-2B OS=Mus musculus GN=Coro2b PE=2 SV=2	2	6.7749	16.7428		0.450955	1.5868		1.30527		0.00290806
sp|Q9JHN8|STK19_MOUSE	Stk19	Serine/threonine-protein kinase 19 OS=Mus musculus GN=Stk19 PE=2 SV=2	1	19.0483	5.60508		2.17848	0.55424		-1.76486		0.0029097
sp|Q8CG71|P3H2_MOUSE	Leprel1	Prolyl 3-hydroxylase 2 OS=Mus musculus GN=Leprel1 PE=2 SV=1	10	16.3675	8.51853		0.825227	1.02195		-0.942161		0.0029104
sp|P15331-2|PERI_MOUSE	Prph	Isoform 3u of Peripherin OS=Mus musculus GN=Prph	39	8.02036	18.6797		1.04229	1.44702		1.21973		0.00291139
sp|Q99KG3-3|RBM10_MOUSE	Rbm10	Isoform 3 of RNA-binding protein 10 OS=Mus musculus GN=Rbm10	13	15.57	9.07748		0.60209	0.901089		-0.778403		0.00291175
sp|Q9JKC7|AP4M1_MOUSE	Ap4m1	AP-4 complex subunit mu-1 OS=Mus musculus GN=Ap4m1 PE=2 SV=1	4	9.01834	15.7219		0.387236	1.0554		0.801841		0.00291245
sp|Q4FZF3|DDX49_MOUSE	Ddx49	Probable ATP-dependent RNA helicase DDX49 OS=Mus musculus GN=Ddx49 PE=2 SV=1	5	17.4218	4.57347		2.14707	0.208718		-1.92953		0.00291273
tr|E9PW44|E9PW44_MOUSE	Ythdc1	Uncharacterized protein OS=Mus musculus GN=Ythdc1 PE=4 SV=1	7	16.0548	9.03026		0.320897	1.1322		-0.830168		0.00291357
tr|E9Q1Z4|E9Q1Z4_MOUSE	Zc3h7b	Uncharacterized protein OS=Mus musculus GN=Zc3h7b PE=4 SV=1	6	10.568	12.6371		0.102265	0.331091		0.257971		0.00291415
sp|Q9D0G0|RT30_MOUSE	Mrps30	28S ribosomal protein S30, mitochondrial OS=Mus musculus GN=Mrps30 PE=2 SV=1	12	14.6365	9.51555		0.770073	0.381964		-0.621215		0.00291443
sp|O88792|JAM1_MOUSE	F11r	Junctional adhesion molecule A OS=Mus musculus GN=F11r PE=1 SV=1	2	12.9954	1.16702		1.96163	0.316585		-3.4771		0.00291458
sp|Q80Z96|VANG1_MOUSE	Vangl1	Vang-like protein 1 OS=Mus musculus GN=Vangl1 PE=1 SV=2	3	9.2782	16.0288		0.733478	0.861615		0.788749		0.00291558
sp|O08579|EMD_MOUSE	Emd	Emerin OS=Mus musculus GN=Emd PE=1 SV=1	13	16.9433	9.92033		0.938899	0.712441		-0.772253		0.00291628
sp|Q8BYY4|TT39B_MOUSE	Ttc39b	Tetratricopeptide repeat protein 39B OS=Mus musculus GN=Ttc39b PE=1 SV=1	12	15.0682	7.17821		0.692151	1.12766		-1.06981		0.0029165
sp|Q04750|TOP1_MOUSE	Top1	DNA topoisomerase 1 OS=Mus musculus GN=Top1 PE=1 SV=2	38	15.1279	7.84227		0.265684	1.19636		-0.947869		0.00292097
sp|Q5SWK7|RN145_MOUSE	Rnf145	RING finger protein 145 OS=Mus musculus GN=Rnf145 PE=2 SV=1	1	9.10931	19.0763		0.833503	1.45848		1.06637		0.00292201
sp|P51660|DHB4_MOUSE	Hsd17b4	Peroxisomal multifunctional enzyme type 2 OS=Mus musculus GN=Hsd17b4 PE=1 SV=3	26	9.46407	14.0988		0.657439	0.418754		0.57504		0.00292336
sp|Q8BVU0|LRCH3_MOUSE	Lrch3	Leucine-rich repeat and calponin homology domain-containing protein 3 OS=Mus musculus GN=Lrch3 PE=2 SV=3	10	11.5079	14.1282		0.337419	0.284872		0.295961		0.00292508
tr|Q8CJ26|Q8CJ26_MOUSE	Nradd	Death domain containing membrane protein NRADD OS=Mus musculus GN=Nradd PE=1 SV=1	5	13.2518	4.10544		1.12329	1.05496		-1.69058		0.00292663
sp|Q62177|SEM3B_MOUSE	Sema3b	Semaphorin-3B OS=Mus musculus GN=Sema3b PE=2 SV=2	1	10.6682	19.6425		0.622991	1.3775		0.880664		0.00292942
sp|Q6PIP5|NUDC1_MOUSE	Nudcd1	NudC domain-containing protein 1 OS=Mus musculus GN=Nudcd1 PE=2 SV=2	17	12.457	8.80764		0.0957905	0.607139		-0.500133		0.00293125
sp|P53569|CEBPZ_MOUSE	Cebpz	CCAAT/enhancer-binding protein zeta OS=Mus musculus GN=Cebpz PE=1 SV=2	24	15.6863	6.52387		1.24823	0.912599		-1.26571		0.00293254
sp|Q8BQZ4|RLGPB_MOUSE	Ralgapb	Ral GTPase-activating protein subunit beta OS=Mus musculus GN=Ralgapb PE=1 SV=2	8	9.11457	17.9212		0.735536	1.29252		0.975421		0.00293552
sp|O54774|AP3D1_MOUSE	Ap3d1	AP-3 complex subunit delta-1 OS=Mus musculus GN=Ap3d1 PE=1 SV=1	40	10.0354	16.1113		0.314869	0.978207		0.68298		0.0029406
sp|Q9JIF7|COPB_MOUSE	Copb1	Coatomer subunit beta OS=Mus musculus GN=Copb1 PE=1 SV=1	70	10.781	15.7604		0.523801	0.65939		0.547809		0.00294415
sp|Q8C263|SKA3_MOUSE	Ska3	Spindle and kinetochore-associated protein 3 OS=Mus musculus GN=Ska3 PE=1 SV=1	6	16.9853	7.26955		1.02828	1.28089		-1.22435		0.0029445
sp|Q99K23|UFSP2_MOUSE	Ufsp2	Ufm1-specific protease 2 OS=Mus musculus GN=Ufsp2 PE=1 SV=1	11	10.0523	15.6482		0.493298	0.809254		0.638477		0.00295203
sp|Q03147|CDK7_MOUSE	Cdk7	Cyclin-dependent kinase 7 OS=Mus musculus GN=Cdk7 PE=1 SV=2	6	15.6779	8.947		0.505146	1.02256		-0.809254		0.00295339
sp|Q64378|FKBP5_MOUSE	Fkbp5	Peptidyl-prolyl cis-trans isomerase FKBP5 OS=Mus musculus GN=Fkbp5 PE=1 SV=1	15	15.0019	5.68617		1.28123	0.923194		-1.39962		0.00295401
sp|Q8JZM0|TFB1M_MOUSE	Tfb1m	Dimethyladenosine transferase 1, mitochondrial OS=Mus musculus GN=Tfb1m PE=2 SV=1	4	15.657	8.3871		0.947881	0.789071		-0.900561		0.00295863
sp|P51859|HDGF_MOUSE	Hdgf	Hepatoma-derived growth factor OS=Mus musculus GN=Hdgf PE=1 SV=2	26	16.0865	8.79665		0.94135	0.803171		-0.870822		0.00296097
tr|Q8K337|Q8K337_MOUSE	Inpp5b	Inositol polyphosphate-5-phosphatase B OS=Mus musculus GN=Inpp5b PE=1 SV=1	10	14.3873	8.83414		0.857633	0.392813		-0.70363		0.00296507
sp|Q62417-7|SRBS1_MOUSE	Sorbs1	Isoform 7 of Sorbin and SH3 domain-containing protein 1 OS=Mus musculus GN=Sorbs1	15	6.73188	17.4764		1.03845	1.50212		1.37632		0.00296689
sp|Q8C092|TAF5_MOUSE	Taf5	Transcription initiation factor TFIID subunit 5 OS=Mus musculus GN=Taf5 PE=2 SV=1	1	15.5471	7.8252		0.342966	1.26772		-0.990448		0.00297033
sp|Q810B6|ANFY1_MOUSE	Ankfy1	Ankyrin repeat and FYVE domain-containing protein 1 OS=Mus musculus GN=Ankfy1 PE=2 SV=2	19	9.26902	15.2542		0.296421	0.976434		0.718715		0.00298619
sp|Q8R366|IGSF8_MOUSE	Igsf8	Immunoglobulin superfamily member 8 OS=Mus musculus GN=Igsf8 PE=1 SV=2	3	8.852	20.8655		0.958329	1.80983		1.23704		0.00298849
sp|Q811L6|MAST4_MOUSE	Mast4	Microtubule-associated serine/threonine-protein kinase 4 OS=Mus musculus GN=Mast4 PE=1 SV=3	16	13.9289	8.43471		0.923659	0.153438		-0.723671		0.00298958
sp|Q8VE11|MTMR6_MOUSE	Mtmr6	Myotubularin-related protein 6 OS=Mus musculus GN=Mtmr6 PE=1 SV=1	13	7.84363	18.9357		0.553181	1.81432		1.27151		0.00299117
sp|Q91WE1|SNX15_MOUSE	Snx15	Sorting nexin-15 OS=Mus musculus GN=Snx15 PE=2 SV=1	5	14.9758	10.4615		0.534664	0.556628		-0.517547		0.00299313
sp|Q99NA9|PCGF6_MOUSE	Pcgf6	Polycomb group RING finger protein 6 OS=Mus musculus GN=Pcgf6 PE=1 SV=1	1	17.0956	7.3226		1.63009	0.366496		-1.2232		0.00299661
sp|P28667|MRP_MOUSE	Marcksl1	MARCKS-related protein OS=Mus musculus GN=Marcksl1 PE=1 SV=2	5	18.6493	7.56968		1.51815	1.13226		-1.30082		0.00299916
sp|Q6PCM2-2|INT6_MOUSE	Ints6	Isoform 2 of Integrator complex subunit 6 OS=Mus musculus GN=Ints6	15	13.9826	9.61102		0.534941	0.524942		-0.540868		0.0030002
sp|P26443|DHE3_MOUSE	Glud1	Glutamate dehydrogenase 1, mitochondrial OS=Mus musculus GN=Glud1 PE=1 SV=1	65	7.15585	20.0611		0.551776	2.13524		1.48721		0.00300038
sp|Q3UFK8|FRMD8_MOUSE	Frmd8	FERM domain-containing protein 8 OS=Mus musculus GN=Frmd8 PE=1 SV=2	8	10.9502	16.9677		0.991286	0.280556		0.631835		0.00300062
sp|Q66JX5-2|FR1OP_MOUSE	Fgfr1op	Isoform 2 of FGFR1 oncogene partner OS=Mus musculus GN=Fgfr1op	5	17.3201	7.73269		0.794373	1.43776		-1.1634		0.00300081
sp|Q9CR02|CD043_MOUSE		UPF0534 protein C4orf43 homolog OS=Mus musculus PE=2 SV=1	7	15.9994	8.55462		1.04921	0.719378		-0.90324		0.00300373
sp|Q9CT10|RANB3_MOUSE	Ranbp3	Ran-binding protein 3 OS=Mus musculus GN=Ranbp3 PE=1 SV=2	18	16.2081	8.32951		0.46659	1.26752		-0.960409		0.00300377
sp|Q3TFD2|PCAT1_MOUSE	Lpcat1	Lysophosphatidylcholine acyltransferase 1 OS=Mus musculus GN=Lpcat1 PE=1 SV=1	7	16.4516	10.0688		1.0894	0.111828		-0.708332		0.00300476
sp|Q9CQF3|CPSF5_MOUSE	Nudt21	Cleavage and polyadenylation specificity factor subunit 5 OS=Mus musculus GN=Nudt21 PE=2 SV=1	12	17.7377	6.36923		1.74343	0.868419		-1.47763		0.00300481
sp|Q9D154|ILEUA_MOUSE	Serpinb1a	Leukocyte elastase inhibitor A OS=Mus musculus GN=Serpinb1a PE=1 SV=1	44	1.84169	31.0618		0.223737	4.98731		4.07604		0.0030063
sp|Q3TEI4|CO039_MOUSE		Uncharacterized protein C15orf39 homolog OS=Mus musculus PE=1 SV=2	2	17.3868	7.19946		1.44002	0.998594		-1.27203		0.0030264
sp|P61600|NAA20_MOUSE	Naa20	N-alpha-acetyltransferase 20, NatB catalytic subunit OS=Mus musculus GN=Naa20 PE=2 SV=1	3	14.848	6.12816		1.45096	0.382939		-1.27674		0.0030276
sp|Q8BQR4-2|CL041_MOUSE		Isoform 2 of Uncharacterized protein C12orf41 homolog OS=Mus musculus	3	14.9296	7.843		1.12822	0.460993		-0.928698		0.00302822
sp|Q9D8Y1|T126A_MOUSE	Tmem126a	Transmembrane protein 126A OS=Mus musculus GN=Tmem126a PE=2 SV=1	5	14.9487	7.37609		1.20912	0.488343		-1.01909		0.00303058
sp|Q8VDC1|FYCO1_MOUSE	Fyco1	FYVE and coiled-coil domain-containing protein 1 OS=Mus musculus GN=Fyco1 PE=1 SV=1	30	7.59211	19.4488		0.178054	2.0379		1.35711		0.00303638
sp|Q921E6-2|EED_MOUSE	Eed	Isoform 2 of Polycomb protein EED OS=Mus musculus GN=Eed	10	16.2256	8.0969		1.09391	0.87537		-1.00283		0.00303709
sp|Q9Z2Y3-2|HOME1_MOUSE	Homer1	Isoform 2 of Homer protein homolog 1 OS=Mus musculus GN=Homer1	2	15.9328	10.925		0.796353	0.334566		-0.544371		0.00303739
sp|Q9JK92|HSPB8_MOUSE	Hspb8	Heat shock protein beta-8 OS=Mus musculus GN=Hspb8 PE=1 SV=1	6	18.2128	2.5724		2.6911	0.230424		-2.82376		0.00303884
sp|O54827|AT10A_MOUSE	Atp10a	Probable phospholipid-transporting ATPase VA OS=Mus musculus GN=Atp10a PE=1 SV=4	2	5.95534	22.214		0.399481	2.79615		1.89921		0.00303899
sp|P28481-6|CO2A1_MOUSE	Col2a1	Isoform 6 of Collagen alpha-1(II) chain OS=Mus musculus GN=Col2a1	68	1.84149	30.8152		0.300051	4.98769		4.06469		0.00303963
tr|Q3UH45|Q3UH45_MOUSE	Tecpr2	Uncharacterized protein OS=Mus musculus GN=Tecpr2 PE=2 SV=1	1	7.40946	15.0377		1.26692	0.388237		1.02114		0.00304178
sp|Q8BGY4-2|KLH26_MOUSE	Klhl26	Isoform 2 of Kelch-like protein 26 OS=Mus musculus GN=Klhl26	2	8.14627	17.8551		1.28225	1.08002		1.13212		0.00304204
sp|Q8CD92-2|TTC27_MOUSE	Ttc27	Isoform 2 of Tetratricopeptide repeat protein 27 OS=Mus musculus GN=Ttc27	12	14.6045	7.88576		0.118226	1.16079		-0.889088		0.003043
sp|Q8R3G1|PP1R8_MOUSE	Ppp1r8	Nuclear inhibitor of protein phosphatase 1 OS=Mus musculus GN=Ppp1r8 PE=1 SV=1	14	18.3151	7.72227		1.05153	1.50245		-1.24594		0.00304335
sp|P35293|RAB18_MOUSE	Rab18	Ras-related protein Rab-18 OS=Mus musculus GN=Rab18 PE=2 SV=2	21	8.47563	14.9691		0.867457	0.720202		0.820592		0.00304486
sp|Q8K4K6|PANK1_MOUSE	Pank1	Pantothenate kinase 1 OS=Mus musculus GN=Pank1 PE=1 SV=1	4	13.7154	12.055		0.120694	0.26159		-0.186161		0.0030449
sp|P62748|HPCL1_MOUSE	Hpcal1	Hippocalcin-like protein 1 OS=Mus musculus GN=Hpcal1 PE=2 SV=2	6	16.0478	5.53643		1.6009	0.872681		-1.53535		0.00304559
sp|Q80UJ7|RB3GP_MOUSE	Rab3gap1	Rab3 GTPase-activating protein catalytic subunit OS=Mus musculus GN=Rab3gap1 PE=2 SV=4	24	9.81226	15.6409		0.944591	0.354753		0.672663		0.00304682
sp|Q99JF8|PSIP1_MOUSE	Psip1	PC4 and SFRS1-interacting protein OS=Mus musculus GN=Psip1 PE=1 SV=1	28	20.2258	5.79484		1.9323	1.59046		-1.80335		0.00304722
sp|Q68FD5|CLH_MOUSE	Cltc	Clathrin heavy chain 1 OS=Mus musculus GN=Cltc PE=1 SV=3	152	10.5153	14.9293		0.473544	0.604169		0.505657		0.00304735
tr|B1ASA5|B1ASA5_MOUSE	Zfp362	Uncharacterized protein OS=Mus musculus GN=Zfp362 PE=2 SV=1	3	17.115	8.06126		1.42102	0.683237		-1.08618		0.00304759
sp|O35382|EXOC4_MOUSE	Exoc4	Exocyst complex component 4 OS=Mus musculus GN=Exoc4 PE=2 SV=2	25	9.93728	17.3412		0.0500774	1.28454		0.803281		0.00304863
sp|Q8BP48|AMPM1_MOUSE	Metap1	Methionine aminopeptidase 1 OS=Mus musculus GN=Metap1 PE=2 SV=1	12	15.711	7.72271		0.510452	1.28506		-1.0246		0.00304967
sp|Q8BJW5|NOL11_MOUSE	Nol11	Nucleolar protein 11 OS=Mus musculus GN=Nol11 PE=2 SV=1	15	15.8246	7.41785		1.32919	0.613305		-1.0931		0.00305006
sp|Q61103|REQU_MOUSE	Dpf2	Zinc finger protein ubi-d4 OS=Mus musculus GN=Dpf2 PE=1 SV=1	8	17.9972	7.22105		0.986809	1.58229		-1.31749		0.00305069
sp|Q99JH1|CI023_MOUSE		Alba-like protein C9orf23 homolog OS=Mus musculus PE=2 SV=1	5	14.7002	7.99294		0.858167	0.78515		-0.87904		0.0030508
sp|Q99KU1-2|DHDDS_MOUSE	Dhdds	Isoform 2 of Dehydrodolichyl diphosphate synthase OS=Mus musculus GN=Dhdds	1	17.2636	8.51498		1.48572	0.332742		-1.01966		0.0030514
sp|Q9D2G2|ODO2_MOUSE	Dlst	Dihydrolipoyllysine-residue succinyltransferase component of 2-oxoglutarate dehydrogenase complex, mitochondrial OS=Mus musculus GN=Dlst PE=1 SV=1	17	9.39067	15.021		0.607857	0.761104		0.677678		0.00305167
sp|Q810J8|ZFYV1_MOUSE	Zfyve1	Zinc finger FYVE domain-containing protein 1 OS=Mus musculus GN=Zfyve1 PE=2 SV=2	4	8.4355	18.369		0.834088	1.50675		1.12273		0.00305207
sp|Q8BJZ4|RT35_MOUSE	Mrps35	28S ribosomal protein S35, mitochondrial OS=Mus musculus GN=Mrps35 PE=2 SV=2	6	14.9336	8.36627		0.894972	0.711576		-0.835906		0.0030522
sp|Q8VBV3|EXOS2_MOUSE	Exosc2	Exosome complex component RRP4 OS=Mus musculus GN=Exosc2 PE=2 SV=1	9	16.1483	8.25582		1.31319	0.383276		-0.967901		0.00305298
tr|A6H6N4|A6H6N4_MOUSE	Fhl3	Four and a half LIM domains 3 OS=Mus musculus GN=Fhl3 PE=2 SV=1	8	17.6934	6.69826		0.930102	1.65894		-1.40135		0.00305414
sp|P29594|CASP2_MOUSE	Casp2	Caspase-2 OS=Mus musculus GN=Casp2 PE=1 SV=5	1	17.6042	8.06242		1.34821	0.978532		-1.12663		0.00305687
sp|Q8BHB4|WDR3_MOUSE	Wdr3	WD repeat-containing protein 3 OS=Mus musculus GN=Wdr3 PE=2 SV=1	21	15.3323	7.01804		1.049	1.00135		-1.12744		0.00305776
sp|Q4PJX1|ODR4_MOUSE	Odr4	Protein odr-4 homolog OS=Mus musculus GN=Odr4 PE=2 SV=2	7	7.94016	17.7551		0.976877	1.4095		1.16099		0.00305801
sp|Q9D0D4|DIMT1_MOUSE	Dimt1l	Probable dimethyladenosine transferase OS=Mus musculus GN=Dimt1l PE=2 SV=1	13	17.0875	5.21387		2.05523	0.279318		-1.71251		0.00305919
sp|Q66T02-2|PKHG5_MOUSE	Plekhg5	Isoform 2 of Pleckstrin homology domain-containing family G member 5 OS=Mus musculus GN=Plekhg5	8	19.8446	10.0194		1.64666	0.479993		-0.985956		0.00305955
sp|Q9R0L7|AKP8L_MOUSE	Akap8l	A-kinase anchor protein 8-like OS=Mus musculus GN=Akap8l PE=1 SV=1	7	15.2889	7.72185		1.19264	0.565313		-0.985467		0.00306154
sp|Q3U0J8|TBD2B_MOUSE	Tbc1d2b	TBC1 domain family member 2B OS=Mus musculus GN=Tbc1d2b PE=1 SV=2	14	9.90924	17.6751		0.228291	1.33629		0.834875		0.00306325
sp|Q5MJS3|DMP4_MOUSE	Fam20c	Dentin matrix protein 4 OS=Mus musculus GN=Fam20c PE=2 SV=1	3	8.6956	18.9477		0.844285	1.58236		1.12367		0.00306849
sp|O70551|SRPK1_MOUSE	Srpk1	Serine/threonine-protein kinase SRPK1 OS=Mus musculus GN=Srpk1 PE=1 SV=2	13	15.3702	8.40485		1.05585	0.613035		-0.870845		0.0030837
tr|E9Q0P4|E9Q0P4_MOUSE	Tusc3	Uncharacterized protein OS=Mus musculus GN=Tusc3 PE=4 SV=1	4	9.79401	14.0831		0.444199	0.606327		0.52399		0.00308504
sp|Q3UZ18|NARG2_MOUSE	Narg2	NMDA receptor-regulated protein 2 OS=Mus musculus GN=Narg2 PE=1 SV=2	5	15.3354	9.20272		0.601409	0.892916		-0.736737		0.0030853
sp|Q8BSP2-2|CNDH2_MOUSE	Ncaph2	Isoform 2 of Condensin-2 complex subunit H2 OS=Mus musculus GN=Ncaph2	6	16.6597	7.37857		1.14372	1.15818		-1.17495		0.00308613
sp|P70336|ROCK2_MOUSE	Rock2	Rho-associated protein kinase 2 OS=Mus musculus GN=Rock2 PE=1 SV=1	42	8.69246	11.8327		0.479329	0.272761		0.444943		0.00308667
sp|Q91Z69|SRGP1_MOUSE	Srgap1	SLIT-ROBO Rho GTPase-activating protein 1 OS=Mus musculus GN=Srgap1 PE=1 SV=2	4	3.25961	24.2134		0.729112	3.60531		2.89303		0.00308925
sp|Q32NY4-2|CNNM3_MOUSE	Cnnm3	Isoform 2 of Metal transporter CNNM3 OS=Mus musculus GN=Cnnm3	10	11.3342	17.012		0.720709	0.690093		0.58587		0.00309058
sp|Q8K0H5|TAF10_MOUSE	Taf10	Transcription initiation factor TFIID subunit 10 OS=Mus musculus GN=Taf10 PE=1 SV=1	2	15.2173	8.72945		1.07355	0.379694		-0.801746		0.00309144
sp|Q8R3P6|CO044_MOUSE		UPF0464 protein C15orf44 homolog OS=Mus musculus PE=2 SV=1	8	15.4724	9.02145		0.764376	0.838591		-0.778263		0.00309701
sp|Q80X82|SYMPK_MOUSE	Sympk	Symplekin OS=Mus musculus GN=Sympk PE=1 SV=1	29	12.5071	9.93002		0.42664	0.153596		-0.332874		0.00309713
tr|Q8VHM5|Q8VHM5_MOUSE	Hnrnpr	Heterogeneous nuclear ribonucleoprotein R OS=Mus musculus GN=Hnrnpr PE=2 SV=1	27	16.8682	8.64231		1.21005	0.797971		-0.964814		0.00310229
sp|Q8BUK6|HOOK3_MOUSE	Hook3	Protein Hook homolog 3 OS=Mus musculus GN=Hook3 PE=1 SV=2	26	12.3984	15.1908		0.387938	0.303004		0.293041		0.0031033
sp|Q8CD91|SMOC2_MOUSE	Smoc2	SPARC-related modular calcium-binding protein 2 OS=Mus musculus GN=Smoc2 PE=1 SV=1	6	23.2626	4.34934		3.27462	0.61089		-2.41915		0.00310465
sp|Q9D8P4|RM17_MOUSE	Mrpl17	39S ribosomal protein L17, mitochondrial OS=Mus musculus GN=Mrpl17 PE=1 SV=1	5	15.1685	7.89071		1.0159	0.782574		-0.942851		0.00310591
sp|Q71FD7|FBLI1_MOUSE	Fblim1	Filamin-binding LIM protein 1 OS=Mus musculus GN=Fblim1 PE=1 SV=2	6	17.5566	4.59093		2.07302	0.972131		-1.93516		0.00311233
sp|Q9D720|NSE1_MOUSE	Nsmce1	Non-structural maintenance of chromosomes element 1 homolog OS=Mus musculus GN=Nsmce1 PE=2 SV=1	4	13.7303	8.38395		0.58309	0.742332		-0.711661		0.00311417
sp|Q9ER73|ELP4_MOUSE	Elp4	Elongator complex protein 4 OS=Mus musculus GN=Elp4 PE=2 SV=2	13	13.401	10.394		0.522364	0.0942194		-0.366589		0.00311538
sp|Q8BWB6|STEA2_MOUSE	Steap2	Metalloreductase STEAP2 OS=Mus musculus GN=Steap2 PE=2 SV=1	4	15.2102	4.72387		1.462	1.14037		-1.687		0.00312357
sp|P48722|HS74L_MOUSE	Hspa4l	Heat shock 70 kDa protein 4L OS=Mus musculus GN=Hspa4l PE=1 SV=2	43	24.0138	3.41297		3.54543	0.847393		-2.81476		0.00312862
sp|P62915|TF2B_MOUSE	Gtf2b	Transcription initiation factor IIB OS=Mus musculus GN=Gtf2b PE=1 SV=1	6	17.5668	6.73815		1.90505	0.214389		-1.38243		0.00313056
tr|D3YYU8|D3YYU8_MOUSE	Obsl1	Uncharacterized protein OS=Mus musculus GN=Obsl1 PE=4 SV=1	21	10.2503	15.659		0.926947	0.251084		0.611326		0.00315415
sp|Q9D880|TIM50_MOUSE	Timm50	Mitochondrial import inner membrane translocase subunit TIM50 OS=Mus musculus GN=Timm50 PE=1 SV=1	12	13.5787	8.31385		0.730068	0.585379		-0.707757		0.00315456
sp|Q4KMM3-2|OXR1_MOUSE	Oxr1	Isoform 2 of Oxidation resistance protein 1 OS=Mus musculus GN=Oxr1	11	16.9921	3.39275		2.38869	0.343441		-2.32433		0.00315517
sp|Q925J9-4|MED1_MOUSE	Med1	Isoform 4 of Mediator of RNA polymerase II transcription subunit 1 OS=Mus musculus GN=Med1	17	14.6377	9.16901		0.691535	0.681502		-0.674847		0.00315707
sp|Q8BWR2|PITH1_MOUSE	Pithd1	PITH domain-containing protein 1 OS=Mus musculus GN=Pithd1 PE=2 SV=1	5	17.2942	8.95702		1.30142	0.70853		-0.949194		0.00315819
sp|Q8CFE2|CD027_MOUSE		UPF0609 protein C4orf27 homolog OS=Mus musculus PE=2 SV=1	6	16.2052	8.07956		1.34513	0.524871		-1.00411		0.00315983
sp|Q62481|VPS72_MOUSE	Vps72	Vacuolar protein sorting-associated protein 72 homolog OS=Mus musculus GN=Vps72 PE=2 SV=2	3	17.1196	7.17763		1.33465	1.16098		-1.25407		0.00316349
sp|Q9D864|ARP6_MOUSE	Actr6	Actin-related protein 6 OS=Mus musculus GN=Actr6 PE=2 SV=2	3	15.6549	8.78407		1.14253	0.436218		-0.833649		0.00316408
sp|Q9CWU4|CA052_MOUSE		UPF0690 protein C1orf52 homolog OS=Mus musculus PE=1 SV=1	4	16.6341	5.49971		1.9111	0.541189		-1.59672		0.00318708
sp|Q8VC52|RBPS2_MOUSE	Rbpms2	RNA-binding protein with multiple splicing 2 OS=Mus musculus GN=Rbpms2 PE=1 SV=1	3	12.8021	3.89343		1.53559	0.417423		-1.71726		0.00319949
sp|Q6PDQ2|CHD4_MOUSE	Chd4	Chromodomain-helicase-DNA-binding protein 4 OS=Mus musculus GN=Chd4 PE=1 SV=1	80	15.8943	8.35453		0.819347	1.073		-0.927876		0.00321322
sp|Q9DCC4|P5CR3_MOUSE	Pycrl	Pyrroline-5-carboxylate reductase 3 OS=Mus musculus GN=Pycrl PE=2 SV=2	17	15.0206	6.62473		1.28872	0.774118		-1.18101		0.00321719
sp|Q3UHX0|NOL8_MOUSE	Nol8	Nucleolar protein 8 OS=Mus musculus GN=Nol8 PE=1 SV=2	14	14.6034	8.21478		0.97658	0.595451		-0.830013		0.00321976
sp|Q5SF07|IF2B2_MOUSE	Igf2bp2	Insulin-like growth factor 2 mRNA-binding protein 2 OS=Mus musculus GN=Igf2bp2 PE=1 SV=1	32	17.3884	0.807163		2.96501	0.126349		-4.42912		0.00321992
sp|Q921H9|SELR1_MOUSE	Selrc1	Sel1 repeat-containing protein 1 OS=Mus musculus GN=Selrc1 PE=1 SV=1	7	17.359	6.90255		1.49303	1.14101		-1.33048		0.00322179
sp|Q6NZQ4|PAXI1_MOUSE	Paxip1	PAX-interacting protein 1 OS=Mus musculus GN=Paxip1 PE=1 SV=1	3	15.6746	7.88392		1.38146	0.225371		-0.991441		0.00322301
sp|Q6P3Y5-3|Z280C_MOUSE	Znf280c	Isoform 3 of Zinc finger protein 280C OS=Mus musculus GN=Znf280c	3	19.3867	6.14606		1.78288	1.56883		-1.65733		0.00322607
sp|Q69ZN7|MYOF_MOUSE	Myof	Myoferlin OS=Mus musculus GN=Myof PE=1 SV=2	177	11.3603	14.8875		0.595777	0.215946		0.390101		0.00322675
sp|Q8R146-2|APEH_MOUSE	Apeh	Isoform 2 of Acylamino-acid-releasing enzyme OS=Mus musculus GN=Apeh	26	9.29414	18.5143		0.803076	1.44549		0.994249		0.003229
sp|Q499D0|FOXN3_MOUSE	Foxn3	Forkhead box protein N3 OS=Mus musculus GN=Foxn3 PE=1 SV=1	2	15.5776	8.76211		1.13181	0.467226		-0.830123		0.00323043
sp|Q8C3X8|LMF2_MOUSE	Lmf2	Lipase maturation factor 2 OS=Mus musculus GN=Lmf2 PE=2 SV=1	12	13.6971	9.04339		0.349017	0.759155		-0.598931		0.0032307
sp|P46061|RAGP1_MOUSE	Rangap1	Ran GTPase-activating protein 1 OS=Mus musculus GN=Rangap1 PE=1 SV=2	39	15.2343	7.7307		0.371538	1.29553		-0.978655		0.00323147
sp|Q9JJX8|ST32B_MOUSE	Stk32b	Serine/threonine-protein kinase 32B OS=Mus musculus GN=Stk32b PE=2 SV=2	1	2.51957	28.9897		0.306957	4.7414		3.52429		0.00323153
sp|Q9WUB0|HOIL1_MOUSE	Rbck1	RanBP-type and C3HC4-type zinc finger-containing protein 1 OS=Mus musculus GN=Rbck1 PE=1 SV=2	5	8.78317	14.5854		0.741474	0.735532		0.731714		0.0032381
sp|O08582|GTPB1_MOUSE	Gtpbp1	GTP-binding protein 1 OS=Mus musculus GN=Gtpbp1 PE=1 SV=2	13	14.32	7.29036		0.0480164	1.26666		-0.973969		0.00325207
sp|Q9WUF3|C8AP2_MOUSE	Casp8ap2	CASP8-associated protein 2 OS=Mus musculus GN=Casp8ap2 PE=1 SV=2	2	19.4034	7.49192		1.83227	1.12026		-1.3729		0.00325465
sp|Q9D0B0|SRSF9_MOUSE	Srsf9	Serine/arginine-rich splicing factor 9 OS=Mus musculus GN=Srsf9 PE=1 SV=1	12	14.5042	9.50016		0.238102	0.871614		-0.610447		0.00326523
sp|Q9CX11|UTP23_MOUSE	Utp23	rRNA-processing protein UTP23 homolog OS=Mus musculus GN=Utp23 PE=2 SV=1	3	14.7997	5.98795		0.301686	1.56328		-1.30543		0.00326537
sp|P30412|PPIC_MOUSE	Ppic	Peptidyl-prolyl cis-trans isomerase C OS=Mus musculus GN=Ppic PE=1 SV=1	14	5.73478	19.8729		1.25114	2.22673		1.79299		0.00326764
sp|Q6IE82|JADE3_MOUSE	Phf16	Protein Jade-3 OS=Mus musculus GN=Phf16 PE=2 SV=1	1	19.0705	5.34697		2.38413	0.692269		-1.83455		0.00327657
sp|Q99MI1|RB6I2_MOUSE	Erc1	ELKS/Rab6-interacting/CAST family member 1 OS=Mus musculus GN=Erc1 PE=1 SV=1	33	10.3656	15.5599		0.670489	0.659538		0.586036		0.00328381
tr|Q8VCG1|Q8VCG1_MOUSE	Dut	Deoxyuridine triphosphatase OS=Mus musculus GN=Dut PE=2 SV=1	14	17.5884	5.10645		0.876057	2.08434		-1.78423		0.0032851
sp|A2AG58|CX023_MOUSE		Uncharacterized protein CXorf23 homolog OS=Mus musculus PE=2 SV=1	8	18.493	5.80547		2.16143	0.783868		-1.67149		0.0032865
sp|Q9JI75|NQO2_MOUSE	Nqo2	Ribosyldihydronicotinamide dehydrogenase [quinone] OS=Mus musculus GN=Nqo2 PE=2 SV=3	7	9.60979	15.5377		0.590393	0.90355		0.6932		0.00330629
sp|Q9EQQ2|YIPF5_MOUSE	Yipf5	Protein YIPF5 OS=Mus musculus GN=Yipf5 PE=2 SV=1	1	7.92833	17.7511		1.24076	1.28112		1.16282		0.00330682
sp|Q6NS46|RRP5_MOUSE	Pdcd11	Protein RRP5 homolog OS=Mus musculus GN=Pdcd11 PE=2 SV=2	62	15.6229	6.88401		1.22662	1.0082		-1.18234		0.00330775
sp|Q3TKT4-2|SMCA4_MOUSE	Smarca4	Isoform 2 of Transcription activator BRG1 OS=Mus musculus GN=Smarca4	41	16.7753	7.46264		1.18855	1.20674		-1.16858		0.00330864
sp|P97393|RHG05_MOUSE	Arhgap5	Rho GTPase-activating protein 5 OS=Mus musculus GN=Arhgap5 PE=2 SV=2	27	8.81444	15.0761		0.400524	1.06463		0.774326		0.0033093
sp|Q9CQ26|STABP_MOUSE	Stambp	STAM-binding protein OS=Mus musculus GN=Stambp PE=2 SV=1	8	9.97833	17.7673		1.40714	0.176356		0.832351		0.00331005
sp|Q8BFZ9|ERLN2_MOUSE	Erlin2	Erlin-2 OS=Mus musculus GN=Erlin2 PE=1 SV=1	23	9.75262	18.2231		0.121119	1.53509		0.901904		0.00331066
sp|Q9JMC3|DNJA4_MOUSE	Dnaja4	DnaJ homolog subfamily A member 4 OS=Mus musculus GN=Dnaja4 PE=2 SV=1	3	9.42615	16.9838		1.20376	0.668696		0.849422		0.00331104
sp|O35130|NEP1_MOUSE	Emg1	Ribosomal RNA small subunit methyltransferase NEP1 OS=Mus musculus GN=Emg1 PE=1 SV=1	8	13.7133	7.53728		0.0981877	1.11896		-0.863456		0.00331239
sp|Q91V81-2|RBM42_MOUSE	Rbm42	Isoform 2 of RNA-binding protein 42 OS=Mus musculus GN=Rbm42	6	15.0072	8.51208		0.59904	1.01911		-0.818069		0.00331334
sp|Q924T7-2|RNF31_MOUSE	Rnf31	Isoform 2 of RING finger protein 31 OS=Mus musculus GN=Rnf31	5	7.95919	16.6039		0.838891	1.33167		1.06083		0.00331337
sp|Q6PCL9|PAPOG_MOUSE	Papolg	Poly(A) polymerase gamma OS=Mus musculus GN=Papolg PE=1 SV=1	3	16.1591	7.26278		1.26045	1.0206		-1.15375		0.0033143
tr|E9QP49|E9QP49_MOUSE	Ehbp1l1	Uncharacterized protein OS=Mus musculus GN=Ehbp1l1 PE=4 SV=1	25	13.6578	8.24885		0.825833	0.544567		-0.727457		0.00334308
sp|Q3UU96-2|MRCKA_MOUSE	Cdc42bpa	Isoform 2 of Serine/threonine-protein kinase MRCK alpha OS=Mus musculus GN=Cdc42bpa	29	9.0367	18.0442		0.459785	1.58107		0.997665		0.00334511
sp|Q9JI39|ABCBA_MOUSE	Abcb10	ATP-binding cassette sub-family B member 10, mitochondrial OS=Mus musculus GN=Abcb10 PE=2 SV=1	6	11.1514	15.6856		0.60554	0.566491		0.492219		0.00334652
sp|Q9DBR4|APBB2_MOUSE	Apbb2	Amyloid beta A4 precursor protein-binding family B member 2 OS=Mus musculus GN=Apbb2 PE=1 SV=2	12	15.7311	7.94507		1.13463	0.861877		-0.985491		0.00334711
sp|Q9Z0H3-2|SNF5_MOUSE	Smarcb1	Isoform B of SWI/SNF-related matrix-associated actin-dependent regulator of chromatin subfamily B member 1 OS=Mus musculus GN=Smarcb1	11	18.5929	6.95125		1.66439	1.33499		-1.4194		0.00336252
sp|Q91VJ5|PQBP1_MOUSE	Pqbp1	Polyglutamine-binding protein 1 OS=Mus musculus GN=Pqbp1 PE=2 SV=1	8	16.0776	8.93303		0.542321	1.19397		-0.847831		0.00337765
sp|Q91WD0-2|GP108_MOUSE	Gpr108	Isoform 2 of Protein GPR108 OS=Mus musculus GN=Gpr108	4	8.62139	17.4785		0.862102	1.37921		1.01959		0.00337986
sp|O88559-2|MEN1_MOUSE	Men1	Isoform 2 of Menin OS=Mus musculus GN=Men1	6	16.5449	8.73587		1.14973	0.858683		-0.921366		0.00338058
sp|Q9D338|RM19_MOUSE	Mrpl19	39S ribosomal protein L19, mitochondrial OS=Mus musculus GN=Mrpl19 PE=2 SV=1	5	14.0913	8.9549		0.750188	0.572501		-0.654059		0.00338201
tr|A2AIE7|A2AIE7_MOUSE	Zfp275	Uncharacterized protein OS=Mus musculus GN=Zfp275 PE=2 SV=1	2	18.7121	9.67637		1.58077	0.514935		-0.951433		0.00338905
sp|Q9CZG9|PDZ11_MOUSE	Pdzd11	PDZ domain-containing protein 11 OS=Mus musculus GN=Pdzd11 PE=1 SV=1	2	16.0714	8.3177		1.16879	0.818952		-0.950238		0.00338965
sp|Q3U1G5|I20L2_MOUSE	Isg20l2	Interferon-stimulated 20 kDa exonuclease-like 2 OS=Mus musculus GN=Isg20l2 PE=2 SV=2	7	14.7111	7.23033		1.21789	0.640986		-1.02477		0.00339167
sp|Q8K3H0|DP13A_MOUSE	Appl1	DCC-interacting protein 13-alpha OS=Mus musculus GN=Appl1 PE=1 SV=1	16	9.46726	17.4494		0.677322	1.31575		0.882159		0.00339593
sp|P28704-2|RXRB_MOUSE	Rxrb	Isoform Short of Retinoic acid receptor RXR-beta OS=Mus musculus GN=Rxrb	1	18.2156	5.9983		1.62758	1.57461		-1.60255		0.00339744
sp|B7ZNG4|TROAP_MOUSE	Troap	Tastin OS=Mus musculus GN=Troap PE=2 SV=1	3	16.4959	6.33092		1.28449	1.37741		-1.38162		0.00339992
sp|Q8CG46-2|SMC5_MOUSE	Smc5	Isoform 2 of Structural maintenance of chromosomes protein 5 OS=Mus musculus GN=Smc5	12	15.0989	7.75512		0.422046	1.29404		-0.961222		0.00340029
sp|Q6RHR9-2|MAGI1_MOUSE	Magi1	Isoform 2 of Membrane-associated guanylate kinase, WW and PDZ domain-containing protein 1 OS=Mus musculus GN=Magi1	1	15.1888	9.62894		1.01184	0.200257		-0.657556		0.0034009
sp|Q9D7N3|RT09_MOUSE	Mrps9	28S ribosomal protein S9, mitochondrial OS=Mus musculus GN=Mrps9 PE=1 SV=3	10	13.9938	9.76134		0.0451863	0.782759		-0.51964		0.00340145
tr|Q8BLD4|Q8BLD4_MOUSE	Tardbp	MCG16669, isoform CRA_f OS=Mus musculus GN=Tardbp PE=2 SV=1	1	21.255	4.15455		3.13523	0.371903		-2.35504		0.00340157
sp|Q9JK30-2|ORC3_MOUSE	Orc3	Isoform 2 of Origin recognition complex subunit 3 OS=Mus musculus GN=Orc3	4	15.7384	6.1979		1.6476	0.638193		-1.34444		0.00340191
sp|P11688|ITA5_MOUSE	Itga5	Integrin alpha-5 OS=Mus musculus GN=Itga5 PE=1 SV=3	30	8.28305	14.8228		0.7122	0.974592		0.839584		0.00340204
sp|Q9D0T1|NH2L1_MOUSE	Nhp2l1	NHP2-like protein 1 OS=Mus musculus GN=Nhp2l1 PE=2 SV=4	6	17.1444	4.66219		2.01042	1.13263		-1.87866		0.00340232
tr|Q6A0C2|Q6A0C2_MOUSE	Morc3	MKIAA0136 protein (Fragment) OS=Mus musculus GN=Morc3 PE=2 SV=1	9	15.9155	8.70437		1.08279	0.786791		-0.870617		0.00340323
sp|Q9WUK4|RFC2_MOUSE	Rfc2	Replication factor C subunit 2 OS=Mus musculus GN=Rfc2 PE=2 SV=1	17	15.9418	6.39422		1.2988	1.19935		-1.31797		0.00340338
sp|P43406|ITAV_MOUSE	Itgav	Integrin alpha-V OS=Mus musculus GN=Itgav PE=1 SV=2	50	11.3853	15.7904		0.482233	0.655429		0.471878		0.00340413
sp|Q99PQ2-2|TRI11_MOUSE	Trim11	Isoform 2 of E3 ubiquitin-protein ligase TRIM11 OS=Mus musculus GN=Trim11	3	9.91068	16.7242		0.829539	0.944527		0.754885		0.00340452
sp|Q9D662|SC23B_MOUSE	Sec23b	Protein transport protein Sec23B OS=Mus musculus GN=Sec23b PE=2 SV=1	22	14.8602	8.87076		0.257485	1.07674		-0.744324		0.00340475
sp|P21995|EMB_MOUSE	Emb	Embigin OS=Mus musculus GN=Emb PE=1 SV=2	8	6.38144	19.3474		0.238671	2.38409		1.60019		0.00340519
sp|P17426-2|AP2A1_MOUSE	Ap2a1	Isoform B of AP-2 complex subunit alpha-1 OS=Mus musculus GN=Ap2a1	48	9.81605	15.7155		0.339932	1.03446		0.678976		0.00340571
sp|Q14BA6|CM033_MOUSE	Awms3	Uncharacterized protein C13orf33 homolog OS=Mus musculus GN=Awms3 PE=2 SV=2	1	3.83875	23.4794		0.951028	3.52118		2.61268		0.0034059
sp|O70481|UBR1_MOUSE	Ubr1	E3 ubiquitin-protein ligase UBR1 OS=Mus musculus GN=Ubr1 PE=1 SV=2	11	9.09643	17.3201		0.864712	1.25991		0.929073		0.00340603
sp|O54890|ITB3_MOUSE	Itgb3	Integrin beta-3 OS=Mus musculus GN=Itgb3 PE=2 SV=2	5	4.11046	22.6476		1.06286	3.26336		2.46199		0.00340618
sp|O88974-4|SETB1_MOUSE	Setdb1	Isoform 4 of Histone-lysine N-methyltransferase SETDB1 OS=Mus musculus GN=Setdb1	10	14.0333	8.80416		0.592131	0.764854		-0.672596		0.00340632
sp|Q9Z138|ROR2_MOUSE	Ror2	Tyrosine-protein kinase transmembrane receptor ROR2 OS=Mus musculus GN=Ror2 PE=1 SV=2	10	16.0987	4.11942		2.08132	0.740561		-1.96643		0.00340665
sp|O54941|SMCE1_MOUSE	Smarce1	SWI/SNF-related matrix-associated actin-dependent regulator chromatin subfamily E member 1 OS=Mus musculus GN=Smarce1 PE=1 SV=1	21	17.881	7.55494		1.34016	1.36199		-1.24294		0.00340696
tr|Q8JZR2|Q8JZR2_MOUSE	Crk	Crk protein OS=Mus musculus GN=Crk PE=2 SV=1	1	10.1171	17.3484		0.679595	1.14803		0.77801		0.00340801
sp|Q9JI90|RNF14_MOUSE	Rnf14	E3 ubiquitin-protein ligase RNF14 OS=Mus musculus GN=Rnf14 PE=2 SV=2	4	6.98123	18.6336		0.101374	2.16257		1.41635		0.0034083
sp|Q61753|SERA_MOUSE	Phgdh	D-3-phosphoglycerate dehydrogenase OS=Mus musculus GN=Phgdh PE=1 SV=3	41	14.5735	7.50497		1.08385	0.733147		-0.957426		0.00340837
sp|Q9Z0R4-2|ITSN1_MOUSE	Itsn1	Isoform 2 of Intersectin-1 OS=Mus musculus GN=Itsn1	34	8.56114	18.1151		0.729695	1.6036		1.08131		0.0034103
sp|B9EKI3|TMF1_MOUSE	Tmf1	TATA element modulatory factor OS=Mus musculus GN=Tmf1 PE=1 SV=2	20	10.9021	15.3422		0.29212	0.77386		0.492895		0.00341207
sp|Q8BZ98-2|DYN3_MOUSE	Dnm3	Isoform 2 of Dynamin-3 OS=Mus musculus GN=Dnm3	4	20.0718	7.96117		1.51765	1.66435		-1.33412		0.00341383
sp|P51954|NEK1_MOUSE	Nek1	Serine/threonine-protein kinase Nek1 OS=Mus musculus GN=Nek1 PE=1 SV=2	4	9.8075	18.1419		0.732581	1.36874		0.887368		0.00341433
sp|Q9Z321|TOP3B_MOUSE	Top3b	DNA topoisomerase 3-beta-1 OS=Mus musculus GN=Top3b PE=2 SV=1	14	10.5882	14.2191		0.518916	0.434445		0.425377		0.00341487
sp|P70213|FV1_MOUSE	Fv1	Friend virus susceptibility protein 1 OS=Mus musculus GN=Fv1 PE=2 SV=1	3	13.2335	6.16569		1.12153	0.695226		-1.10186		0.00341686
sp|Q9DCU6|RM04_MOUSE	Mrpl4	39S ribosomal protein L4, mitochondrial OS=Mus musculus GN=Mrpl4 PE=2 SV=1	5	15.5885	8.02253		1.09434	0.89051		-0.95835		0.00341714
sp|Q8K3K8|OPTN_MOUSE	Optn	Optineurin OS=Mus musculus GN=Optn PE=1 SV=1	18	10.2022	18.1955		0.112971	1.48765		0.834699		0.00341741
sp|Q8VHK9|DHX36_MOUSE	Dhx36	Probable ATP-dependent RNA helicase DHX36 OS=Mus musculus GN=Dhx36 PE=2 SV=1	27	14.2982	8.16941		1.07644	0.380097		-0.807527		0.00341783
sp|Q9ER00|STX12_MOUSE	Stx12	Syntaxin-12 OS=Mus musculus GN=Stx12 PE=1 SV=1	8	16.314	9.2899		0.773641	1.05803		-0.812376		0.003418
sp|Q9ESG9|PMYT1_MOUSE	Pkmyt1	Membrane-associated tyrosine- and threonine-specific cdc2-inhibitory kinase OS=Mus musculus GN=Pkmyt1 PE=2 SV=3	1	15.9084	6.10582		1.59325	0.890777		-1.38154		0.003418
sp|Q99PM9|UCK2_MOUSE	Uck2	Uridine-cytidine kinase 2 OS=Mus musculus GN=Uck2 PE=1 SV=1	7	14.3499	8.68621		0.95758	0.441356		-0.724245		0.00341881
tr|E9Q9F5|E9Q9F5_MOUSE	2014-09-07	Uncharacterized protein OS=Mus musculus GN=Sept7 PE=3 SV=1	1	7.51564	19.5644		0.189055	2.24		1.38026		0.00341987
sp|Q8CI75|DI3L2_MOUSE	Dis3l2	DIS3-like exonuclease 2 OS=Mus musculus GN=Dis3l2 PE=1 SV=1	12	7.82816	20.923		0.212835	2.43764		1.41835		0.00342066
sp|Q99J62|RFC4_MOUSE	Rfc4	Replication factor C subunit 4 OS=Mus musculus GN=Rfc4 PE=1 SV=1	14	16.1401	6.31668		1.26651	1.3282		-1.35341		0.00342203
sp|Q9DAC9|PO5F2_MOUSE	Pou5f2	POU domain, class 5, transcription factor 2 OS=Mus musculus GN=Pou5f2 PE=2 SV=1	1	12.4957	8.3607		0.244707	0.729862		-0.57974		0.00342252
sp|Q6A026|PDS5A_MOUSE	Pds5a	Sister chromatid cohesion protein PDS5 homolog A OS=Mus musculus GN=Pds5a PE=2 SV=3	30	15.9897	7.9717		0.626719	1.37328		-1.00418		0.00344238
sp|Q8BX57-2|PXK_MOUSE	Pxk	Isoform 2 of PX domain-containing protein kinase-like protein OS=Mus musculus GN=Pxk	5	10.4946	13.259		0.159269	0.495364		0.337324		0.00344351
sp|Q9Z0U0-2|XPR1_MOUSE	Xpr1	Isoform 2 of Xenotropic and polytropic retrovirus receptor 1 OS=Mus musculus GN=Xpr1	3	10.2768	16.1494		0.427636	1.02002		0.65209		0.00344359
sp|Q8C0J2-2|A16L1_MOUSE	Atg16l1	Isoform 2 of Autophagy-related protein 16-1 OS=Mus musculus GN=Atg16l1	9	10.8895	15.2263		0.669136	0.467268		0.483629		0.00344458
sp|Q91VD9|NDUS1_MOUSE	Ndufs1	NADH-ubiquinone oxidoreductase 75 kDa subunit, mitochondrial OS=Mus musculus GN=Ndufs1 PE=1 SV=2	44	7.34115	18.0967		1.25228	1.58968		1.30165		0.00344587
sp|P42859-2|HD_MOUSE	Htt	Isoform Short of Huntingtin OS=Mus musculus GN=Htt	21	11.0716	15.7041		0.662555	0.566009		0.504282		0.00344638
sp|Q9Z315|SNUT1_MOUSE	Sart1	U4/U6.U5 tri-snRNP-associated protein 1 OS=Mus musculus GN=Sart1 PE=2 SV=1	23	15.3522	9.06611		0.783375	0.878987		-0.75989		0.00344812
sp|Q65Z40|WAPL_MOUSE	Wapal	Wings apart-like protein homolog OS=Mus musculus GN=Wapal PE=1 SV=2	23	14.1137	9.013		0.224501	0.937536		-0.647021		0.00344814
sp|Q05895|TSP3_MOUSE	Thbs3	Thrombospondin-3 OS=Mus musculus GN=Thbs3 PE=1 SV=2	6	17.4206	6.76174		1.89207	0.642874		-1.36533		0.00344863
sp|Q8BHS3|RBM22_MOUSE	Rbm22	Pre-mRNA-splicing factor RBM22 OS=Mus musculus GN=Rbm22 PE=2 SV=1	13	14.4577	8.73608		0.461975	0.977474		-0.726776		0.00344904
sp|Q9JI38|PUS3_MOUSE	Pus3	tRNA pseudouridine synthase 3 OS=Mus musculus GN=Pus3 PE=1 SV=2	1	14.6617	6.04113		1.0214	1.25683		-1.27916		0.00344906
sp|Q9QWH1-2|PHC2_MOUSE	Phc2	Isoform 2 of Polyhomeotic-like protein 2 OS=Mus musculus GN=Phc2	5	15.3203	7.40746		1.34597	0.646264		-1.04839		0.0034492
tr|A2AF31|A2AF31_MOUSE	Tmsb15b2	Novel protein (4930488E11Rik) OS=Mus musculus GN=Tmsb15b2 PE=4 SV=1	1	24.7145	8.38651		2.55914	1.71411		-1.55922		0.00344965
sp|Q61211-2|EIF2D_MOUSE	Eif2d	Isoform 2 of Eukaryotic translation initiation factor 2D OS=Mus musculus GN=Eif2d	8	9.38099	16.2113		0.177789	1.27204		0.789187		0.00344985
sp|P97467|AMD_MOUSE	Pam	Peptidyl-glycine alpha-amidating monooxygenase OS=Mus musculus GN=Pam PE=1 SV=2	11	4.38569	26.1622		0.727829	4.05506		2.57661		0.00344993
sp|Q9JKX4|AATF_MOUSE	Aatf	Protein AATF OS=Mus musculus GN=Aatf PE=1 SV=1	13	13.6596	6.89236		1.2332	0.315573		-0.986845		0.00345003
sp|Q91WM3|U3IP2_MOUSE	Rrp9	U3 small nucleolar RNA-interacting protein 2 OS=Mus musculus GN=Rrp9 PE=1 SV=1	10	16.4048	6.61692		1.79438	0.400572		-1.30988		0.00345089
sp|Q8BTI8-3|SRRM2_MOUSE	Srrm2	Isoform 3 of Serine/arginine repetitive matrix protein 2 OS=Mus musculus GN=Srrm2	62	15.4451	9.08354		0.520081	1.07662		-0.765823		0.00345091
sp|Q9DCD2|SYF1_MOUSE	Xab2	Pre-mRNA-splicing factor SYF1 OS=Mus musculus GN=Xab2 PE=2 SV=1	18	15.3429	8.77317		0.53754	1.11048		-0.806404		0.0034513
sp|Q5I012-2|S38AA_MOUSE	Slc38a10	Isoform 2 of Putative sodium-coupled neutral amino acid transporter 10 OS=Mus musculus GN=Slc38a10	11	6.63072	21.8779		0.631301	2.78766		1.72224		0.00345143
sp|Q7TMV3|FAKD5_MOUSE	Fastkd5	FAST kinase domain-containing protein 5 OS=Mus musculus GN=Fastkd5 PE=2 SV=1	7	13.3481	7.75172		0.934237	0.495232		-0.784042		0.00345159
tr|Q8BML9|Q8BML9_MOUSE	Qars	Glutaminyl-tRNA synthetase OS=Mus musculus GN=Qars PE=2 SV=1	54	13.8886	11.2098		0.499921	0.0733633		-0.309141		0.00345189
sp|Q8BK67|RCC2_MOUSE	Rcc2	Protein RCC2 OS=Mus musculus GN=Rcc2 PE=2 SV=1	29	18.2665	4.23329		2.48859	0.899769		-2.10935		0.00345222
sp|Q91WQ5|TAF5L_MOUSE	Taf5l	TAF5-like RNA polymerase II p300/CBP-associated factor-associated factor 65 kDa subunit 5L OS=Mus musculus GN=Taf5l PE=2 SV=1	3	16.8102	8.83513		0.346052	1.46842		-0.928016		0.00345241
sp|Q8R344|CCD12_MOUSE	Ccdc12	Coiled-coil domain-containing protein 12 OS=Mus musculus GN=Ccdc12 PE=1 SV=2	6	18.1303	7.09026		1.29714	1.62765		-1.35449		0.00345275
tr|Q99KN6|Q99KN6_MOUSE	Htatip2	HIV-1 tat interactive protein 2, homolog (Human) OS=Mus musculus GN=Htatip2 PE=2 SV=1	4	2.78207	10.1662		0.729823	1.18118		1.86955		0.00345285
sp|Q924Z4|LASS2_MOUSE	Lass2	LAG1 longevity assurance homolog 2 OS=Mus musculus GN=Lass2 PE=1 SV=1	6	14.111	9.5478		0.768679	0.39016		-0.563584		0.003453
sp|Q8CH72|TRI32_MOUSE	Trim32	E3 ubiquitin-protein ligase TRIM32 OS=Mus musculus GN=Trim32 PE=1 SV=2	10	9.91541	15.2502		0.873768	0.50159		0.621087		0.00345308
sp|Q3U1C6-2|TATD3_MOUSE	Tatdn3	Isoform 2 of Putative deoxyribonuclease TATDN3 OS=Mus musculus GN=Tatdn3	1	8.52123	17.1798		0.945946	1.3222		1.01158		0.00345314
sp|Q9CRB2|NHP2_MOUSE	Nhp2	H/ACA ribonucleoprotein complex subunit 2 OS=Mus musculus GN=Nhp2 PE=2 SV=1	6	16.7152	7.28934		1.50271	0.933231		-1.1973		0.00345418
sp|Q80UK8|INT2_MOUSE	Ints2	Integrator complex subunit 2 OS=Mus musculus GN=Ints2 PE=2 SV=2	7	14.7568	8.74649		0.607041	0.951061		-0.754608		0.0034543
sp|P47791-2|GSHR_MOUSE	Gsr	Isoform Cytoplasmic of Glutathione reductase, mitochondrial OS=Mus musculus GN=Gsr	10	16.3941	10.0033		1.01826	0.631056		-0.712704		0.00345442
sp|Q8BJQ2|UBP1_MOUSE	Usp1	Ubiquitin carboxyl-terminal hydrolase 1 OS=Mus musculus GN=Usp1 PE=2 SV=1	8	18.2323	7.78483		1.58245	1.15665		-1.22776		0.00345445
tr|A2A654|A2A654_MOUSE	Bptf	Bromodomain PHD finger transcription factor OS=Mus musculus GN=Bptf PE=4 SV=1	21	15.5378	8.83578		0.948011	0.841617		-0.814356		0.00345484
sp|Q9D4V0|EKI1_MOUSE	Etnk1	Ethanolamine kinase 1 (Fragment) OS=Mus musculus GN=Etnk1 PE=2 SV=1	3	16.3772	8.5127		0.896156	1.18904		-0.943997		0.00345566
tr|E9Q5G3|E9Q5G3_MOUSE	Kif23	Uncharacterized protein OS=Mus musculus GN=Kif23 PE=3 SV=1	29	17.6391	6.27219		1.56756	1.46636		-1.49173		0.00345577
sp|Q8BGQ6-2|K0494_MOUSE	Kiaa0494	Isoform 2 of EF-hand domain-containing protein KIAA0494 OS=Mus musculus GN=Kiaa0494	5	16.7941	9.04314		0.953713	1.1172		-0.893059		0.00346147
sp|Q08775-2|RUNX2_MOUSE	Runx2	Isoform 2 of Runt-related transcription factor 2 OS=Mus musculus GN=Runx2	4	18.5815	6.80786		2.10047	0.751423		-1.44859		0.00346265
sp|P70343|CASP4_MOUSE	Casp4	Caspase-4 OS=Mus musculus GN=Casp4 PE=1 SV=2	1	24.5742	4.35824		3.559	1.42572		-2.49533		0.00346722
sp|Q3UEB3-2|PUF60_MOUSE	Puf60	Isoform 2 of Poly(U)-binding-splicing factor PUF60 OS=Mus musculus GN=Puf60	35	14.5416	8.36638		0.08875	1.1691		-0.79751		0.00347492
sp|B2RY56-2|RBM25_MOUSE	Rbm25	Isoform 2 of RNA-binding protein 25 OS=Mus musculus GN=Rbm25	29	13.7941	9.00842		0.81112	0.410402		-0.614701		0.00347706
sp|B2RX14|TUT4_MOUSE	Zcchc11	Terminal uridylyltransferase 4 OS=Mus musculus GN=Zcchc11 PE=1 SV=2	12	14.8172	10.441		0.695839	0.454032		-0.505013		0.00347826
sp|Q80VL1|TDRKH_MOUSE	Tdrkh	Tudor and KH domain-containing protein OS=Mus musculus GN=Tdrkh PE=1 SV=1	7	15.5909	3.51054		2.28789	0.222047		-2.15094		0.00348134
sp|Q9ES34|UBE3B_MOUSE	Ube3b	Ubiquitin-protein ligase E3B OS=Mus musculus GN=Ube3b PE=2 SV=3	5	9.10084	16.3005		0.497266	1.27549		0.840845		0.00348336
sp|Q8C4J7|TBL3_MOUSE	Tbl3	Transducin beta-like protein 3 OS=Mus musculus GN=Tbl3 PE=2 SV=1	12	15.283	7.15585		1.41445	0.624995		-1.09473		0.00348475
sp|Q8C3B8|RFT1_MOUSE	Rft1	Protein RFT1 homolog OS=Mus musculus GN=Rft1 PE=2 SV=2	1	7.12723	17.9149		1.03365	1.77137		1.32974		0.00348487
sp|Q922Q1|MOSC2_MOUSE	Mosc2	MOSC domain-containing protein 2, mitochondrial OS=Mus musculus GN=Mosc2 PE=1 SV=1	13	10.038	17.3726		0.90834	1.05932		0.79135		0.00348693
sp|Q8BIE6-2|FRM4A_MOUSE	Frmd4a	Isoform 2 of FERM domain-containing protein 4A OS=Mus musculus GN=Frmd4a	5	15.5967	4.5509		2.04985	0.479433		-1.77702		0.00349157
tr|E9PWZ7|E9PWZ7_MOUSE	Wdr75	Uncharacterized protein OS=Mus musculus GN=Wdr75 PE=4 SV=1	16	16.0685	7.19179		1.59713	0.560804		-1.15981		0.00349165
sp|Q8BGB8|COQ4_MOUSE	Coq4	Ubiquinone biosynthesis protein COQ4 homolog, mitochondrial OS=Mus musculus GN=Coq4 PE=2 SV=1	4	13.2166	8.71914		0.349283	0.783051		-0.600093		0.00349203
sp|Q8CE90-6|MP2K7_MOUSE	Map2k7	Isoform 6 of Dual specificity mitogen-activated protein kinase kinase 7 OS=Mus musculus GN=Map2k7	6	15.9082	9.62524		0.921453	0.763817		-0.724877		0.00349269
sp|Q9R0N3|SYT11_MOUSE	Syt11	Synaptotagmin-11 OS=Mus musculus GN=Syt11 PE=2 SV=2	1	19.4831	2.54953		3.22653	0.0678352		-2.93392		0.00349518
sp|Q91YN1-2|F118A_MOUSE	Fam118a	Isoform 2 of Protein FAM118A OS=Mus musculus GN=Fam118a	1	16.1895	5.95822		1.88026	0.531945		-1.4421		0.0035087
sp|P20352|TF_MOUSE	F3	Tissue factor OS=Mus musculus GN=F3 PE=1 SV=2	5	7.58036	20.5403		2.06328	1.36874		1.43812		0.00350931
tr|A2AQA0|A2AQA0_MOUSE	Zfp442	Uncharacterized protein OS=Mus musculus GN=Zfp442 PE=2 SV=1	3	18.0346	6.58855		1.69601	1.38312		-1.45274		0.00351614
sp|Q68FL6|SYMC_MOUSE	Mars	Methionyl-tRNA synthetase, cytoplasmic OS=Mus musculus GN=Mars PE=2 SV=1	42	14.3114	9.64722		0.541288	0.709298		-0.568982		0.00351909
sp|Q9D4H1|EXOC2_MOUSE	Exoc2	Exocyst complex component 2 OS=Mus musculus GN=Exoc2 PE=1 SV=1	25	10.8718	15.9166		0.839133	0.479128		0.549934		0.00353287
sp|Q5PRF0|HTR5A_MOUSE	Heatr5a	HEAT repeat-containing protein 5A OS=Mus musculus GN=Heatr5a PE=2 SV=2	23	10.327	13.7832		0.314883	0.582591		0.416492		0.00353373
sp|Q9R0Q3|TMED2_MOUSE	Tmed2	Transmembrane emp24 domain-containing protein 2 OS=Mus musculus GN=Tmed2 PE=1 SV=1	18	9.38402	17.3382		0.308491	1.49401		0.885677		0.00353897
sp|Q9WUZ9|ENTP5_MOUSE	Entpd5	Ectonucleoside triphosphate diphosphohydrolase 5 OS=Mus musculus GN=Entpd5 PE=1 SV=1	2	7.60997	20.6248		0.738755	2.38382		1.43841		0.0035404
sp|Q9CYI4|LUC7L_MOUSE	Luc7l	Putative RNA-binding protein Luc7-like 1 OS=Mus musculus GN=Luc7l PE=2 SV=2	8	18.0473	8.03526		0.657793	1.80509		-1.16737		0.00354228
tr|B2RVR0|B2RVR0_MOUSE	Fam133b	RIKEN cDNA 5830415L20 gene OS=Mus musculus GN=Fam133b PE=2 SV=1	3	17.0139	6.66702		1.60126	1.17808		-1.3516		0.00355173
sp|Q8VDY9|CI082_MOUSE		Uncharacterized protein C9orf82 homolog OS=Mus musculus PE=1 SV=2	1	17.0401	8.00602		1.63113	0.59499		-1.08978		0.00355226
sp|Q80W54|FACE1_MOUSE	Zmpste24	CAAX prenyl protease 1 homolog OS=Mus musculus GN=Zmpste24 PE=1 SV=2	16	14.4804	10.3695		0.616018	0.494227		-0.481755		0.00355464
sp|Q8BU03|PWP2_MOUSE	Pwp2	Periodic tryptophan protein 2 homolog OS=Mus musculus GN=Pwp2 PE=1 SV=1	17	15.4356	7.32435		1.36829	0.754321		-1.07549		0.00356443
sp|Q5SX79-2|SHRM1_MOUSE	Shroom1	Isoform 2 of Protein Shroom1 OS=Mus musculus GN=Shroom1	4	10.8305	19.3973		0.995261	1.31603		0.84076		0.00356649
sp|Q8R326|PSPC1_MOUSE	Pspc1	Paraspeckle component 1 OS=Mus musculus GN=Pspc1 PE=1 SV=1	14	14.4917	9.20185		0.17959	1.00232		-0.655231		0.00356655
sp|P21550|ENOB_MOUSE	Eno3	Beta-enolase OS=Mus musculus GN=Eno3 PE=1 SV=3	28	13.1644	3.63624		1.70991	0.662252		-1.85612		0.00356694
sp|Q8C7V3|UTP15_MOUSE	Utp15	U3 small nucleolar RNA-associated protein 15 homolog OS=Mus musculus GN=Utp15 PE=2 SV=1	18	16.7907	7.02741		1.65703	0.88817		-1.2566		0.00356751
sp|Q8BJW6|EIF2A_MOUSE	Eif2a	Eukaryotic translation initiation factor 2A OS=Mus musculus GN=Eif2a PE=2 SV=2	30	14.1082	10.1168		0.0783432	0.765682		-0.479778		0.00356806
tr|E9QKA8|E9QKA8_MOUSE	Mycbp2	Uncharacterized protein OS=Mus musculus GN=Mycbp2 PE=4 SV=1	45	5.83149	22.462		0.319048	3.19031		1.94555		0.00356866
sp|Q11136|PEPD_MOUSE	Pepd	Xaa-Pro dipeptidase OS=Mus musculus GN=Pepd PE=2 SV=3	9	7.49152	18.3392		0.7547	1.95039		1.2916		0.00357226
sp|P02468|LAMC1_MOUSE	Lamc1	Laminin subunit gamma-1 OS=Mus musculus GN=Lamc1 PE=1 SV=2	28	15.2586	7.35481		0.80716	1.2947		-1.05287		0.00357833
sp|Q9CQ49|NCBP2_MOUSE	Ncbp2	Nuclear cap-binding protein subunit 2 OS=Mus musculus GN=Ncbp2 PE=1 SV=1	6	17.1764	8.37554		1.64416	0.430427		-1.03617		0.0035803
sp|O35943|FRDA_MOUSE	Fxn	Frataxin, mitochondrial OS=Mus musculus GN=Fxn PE=1 SV=1	5	17.3199	8.472		1.3675	1.03089		-1.03166		0.00358158
sp|P22366-2|MYD88_MOUSE	Myd88	Isoform 2 of Myeloid differentiation primary response protein MyD88 OS=Mus musculus GN=Myd88	5	15.3264	9.29103		0.493626	1.05839		-0.722105		0.00358164
sp|Q9Z179|SHCBP_MOUSE	Shcbp1	SHC SH2 domain-binding protein 1 OS=Mus musculus GN=Shcbp1 PE=1 SV=1	10	19.6258	6.91716		2.05796	1.34968		-1.5045		0.0035849
sp|Q9DC48|PRP17_MOUSE	Cdc40	Pre-mRNA-processing factor 17 OS=Mus musculus GN=Cdc40 PE=1 SV=1	13	16.5509	7.64417		1.14159	1.29115		-1.11448		0.00358532
sp|P48455|PP2BC_MOUSE	Ppp3cc	Serine/threonine-protein phosphatase 2B catalytic subunit gamma isoform OS=Mus musculus GN=Ppp3cc PE=2 SV=1	1	8.41714	18.3652		0.93609	1.68466		1.12557		0.00358686
sp|O55201|SPT5H_MOUSE	Supt5h	Transcription elongation factor SPT5 OS=Mus musculus GN=Supt5h PE=1 SV=1	33	15.341	8.90133		0.629431	1.07528		-0.785296		0.0035878
tr|D3Z5T6|D3Z5T6_MOUSE	Klc1	Uncharacterized protein OS=Mus musculus GN=Klc1 PE=4 SV=2	20	8.58496	16.5212		1.04202	1.13256		0.944436		0.00358897
sp|Q8BWW4|LARP4_MOUSE	Larp4	La-related protein 4 OS=Mus musculus GN=Larp4 PE=1 SV=2	22	13.8163	7.21706		0.905802	0.903513		-0.936885		0.00358909
tr|E9Q3C1|E9Q3C1_MOUSE	C2cd2	Uncharacterized protein OS=Mus musculus GN=C2cd2 PE=4 SV=1	4	11.2698	15.1571		0.246745	0.709757		0.427524		0.00359022
sp|Q9JKF6|PVRL1_MOUSE	Pvrl1	Poliovirus receptor-related protein 1 OS=Mus musculus GN=Pvrl1 PE=1 SV=3	2	9.2621	20.377		1.74539	1.26323		1.13753		0.0035911
sp|O08810|U5S1_MOUSE	Eftud2	116 kDa U5 small nuclear ribonucleoprotein component OS=Mus musculus GN=Eftud2 PE=2 SV=1	60	14.316	9.95488		0.523089	0.662096		-0.524155		0.00359139
sp|Q91VZ6|SMAP1_MOUSE	Smap1	Stromal membrane-associated protein 1 OS=Mus musculus GN=Smap1 PE=1 SV=1	8	8.49299	19.0358		0.764319	1.89795		1.16437		0.00359242
sp|O88532|ZFR_MOUSE	Zfr	Zinc finger RNA-binding protein OS=Mus musculus GN=Zfr PE=1 SV=2	29	13.9817	9.17066		0.46249	0.810871		-0.608439		0.0035933
sp|Q9QYE6|GOGA5_MOUSE	Golga5	Golgin subfamily A member 5 OS=Mus musculus GN=Golga5 PE=1 SV=2	19	8.04793	17.8971		0.654499	1.78951		1.15303		0.0035939
sp|Q99PU8-2|DHX30_MOUSE	Dhx30	Isoform 2 of Putative ATP-dependent RNA helicase DHX30 OS=Mus musculus GN=Dhx30	30	14.1622	10.919		0.575055	0.250863		-0.375197		0.00359694
sp|Q02013|AQP1_MOUSE	Aqp1	Aquaporin-1 OS=Mus musculus GN=Aqp1 PE=1 SV=3	10	25.9049	2.4518		4.51359	0.616675		-3.40131		0.00360058
sp|Q9CZU4|ERAL1_MOUSE	Eral1	GTPase Era, mitochondrial OS=Mus musculus GN=Eral1 PE=2 SV=1	1	15.314	8.44203		1.31399	0.239666		-0.85919		0.00360198
sp|Q8BUB4|WDFY2_MOUSE	Wdfy2	WD repeat and FYVE domain-containing protein 2 OS=Mus musculus GN=Wdfy2 PE=2 SV=2	2	7.6224	18.2385		0.57915	1.98007		1.25867		0.00360329
sp|Q8BHY2|NOC4L_MOUSE	Noc4l	Nucleolar complex protein 4 homolog OS=Mus musculus GN=Noc4l PE=2 SV=1	11	15.5485	5.701		1.86143	0.454245		-1.44749		0.00360944
tr|E9Q2H1|E9Q2H1_MOUSE	Ubr5	Uncharacterized protein OS=Mus musculus GN=Ubr5 PE=4 SV=1	40	13.9966	9.06646		0.825709	0.487995		-0.626462		0.00361122
tr|A2AIX1|A2AIX1_MOUSE	Sec16a	SEC16 homolog A (S. cerevisiae) OS=Mus musculus GN=Sec16a PE=4 SV=1	30	10.5124	15.5249		0.229456	0.949364		0.562489		0.00362203
sp|Q3URV1-2|BROMI_MOUSE	bromi	Isoform 2 of Protein broad-minded OS=Mus musculus GN=bromi	2	8.9832	17.297		0.809591	1.40297		0.945221		0.00362425
sp|O88708|ORC4_MOUSE	Orc4	Origin recognition complex subunit 4 OS=Mus musculus GN=Orc4 PE=1 SV=2	5	14.7438	6.24573		1.3875	0.907895		-1.23917		0.00363725
sp|Q9CTH6|FCF1_MOUSE	Fcf1	rRNA-processing protein FCF1 homolog OS=Mus musculus GN=Fcf1 PE=2 SV=2	4	14.4289	6.64476		0.879741	1.23981		-1.11867		0.0036388
sp|P70372|ELAV1_MOUSE	Elavl1	ELAV-like protein 1 OS=Mus musculus GN=Elavl1 PE=1 SV=2	25	14.5721	10.3158		0.633594	0.537961		-0.498352		0.00364129
sp|Q9DBU6|RSRC1_MOUSE	Rsrc1	Serine/Arginine-related protein 53 OS=Mus musculus GN=Rsrc1 PE=1 SV=1	4	15.9602	7.68195		1.18464	1.10165		-1.05493		0.0036437
sp|Q8K135-2|K319L_MOUSE	Kiaa0319l	Isoform 2 of Dyslexia-associated protein KIAA0319-like protein OS=Mus musculus GN=Kiaa0319l	6	15.6131	9.05231		0.514625	1.17324		-0.786402		0.0036444
sp|Q9D281|NXP20_MOUSE	Fam114a1	Protein Noxp20 OS=Mus musculus GN=Fam114a1 PE=2 SV=1	26	7.09767	21.5689		0.550609	2.7778		1.60353		0.00365937
sp|Q14C51|PTCD3_MOUSE	Ptcd3	Pentatricopeptide repeat-containing protein 3, mitochondrial OS=Mus musculus GN=Ptcd3 PE=2 SV=2	15	14.5574	9.4397		0.976837	0.22346		-0.62494		0.00366397
sp|Q01147-2|CREB1_MOUSE	Creb1	Isoform 2 of Cyclic AMP-responsive element-binding protein 1 OS=Mus musculus GN=Creb1	2	16.6915	9.86926		0.846681	1.0339		-0.7581		0.00366567
sp|P61406|EST1A_MOUSE	Smg6	Telomerase-binding protein EST1A OS=Mus musculus GN=Smg6 PE=2 SV=1	7	13.4248	10.4375		0.507289	0.293652		-0.363128		0.0036783
sp|Q8K0D5|EFGM_MOUSE	Gfm1	Elongation factor G, mitochondrial OS=Mus musculus GN=Gfm1 PE=2 SV=1	33	14.3957	7.35662		0.968098	0.985628		-0.968526		0.00367854
sp|Q6RT24|CENPE_MOUSE	Cenpe	Centromere-associated protein E OS=Mus musculus GN=Cenpe PE=1 SV=1	21	16.6153	8.01961		1.08488	1.29113		-1.05091		0.00368073
sp|Q8BMQ2|TF3C4_MOUSE	Gtf3c4	General transcription factor 3C polypeptide 4 OS=Mus musculus GN=Gtf3c4 PE=1 SV=2	15	16.021	7.74004		1.59686	0.299243		-1.04955		0.00368438
sp|P35288|RAB23_MOUSE	Rab23	Ras-related protein Rab-23 OS=Mus musculus GN=Rab23 PE=1 SV=2	7	9.94552	15.8849		0.832058	0.818568		0.675535		0.00369307
sp|Q8CGN4-2|BCOR_MOUSE	Bcor	Isoform 2 of BCL-6 corepressor OS=Mus musculus GN=Bcor	1	18.7718	7.08528		2.10438	0.922307		-1.40567		0.00369526
sp|Q8CFI7|RPB2_MOUSE	Polr2b	DNA-directed RNA polymerase II subunit RPB2 OS=Mus musculus GN=Polr2b PE=2 SV=2	30	14.395	9.63226		0.553184	0.755973		-0.579619		0.0036974
sp|Q99JP0|M4K3_MOUSE	Map4k3	Mitogen-activated protein kinase kinase kinase kinase 3 OS=Mus musculus GN=Map4k3 PE=2 SV=4	6	9.85289	19.5438		1.50439	1.17257		0.988089		0.00370357
sp|Q9R1P3|PSB2_MOUSE	Psmb2	Proteasome subunit beta type-2 OS=Mus musculus GN=Psmb2 PE=1 SV=1	10	14.9167	9.37654		1.034	0.349795		-0.669801		0.00370714
sp|Q9Z2G0|FEM1B_MOUSE	Fem1b	Protein fem-1 homolog B OS=Mus musculus GN=Fem1b PE=1 SV=1	5	13.0058	8.84864		0.229868	0.786041		-0.555624		0.00370905
sp|Q9D706|RPAP3_MOUSE	Rpap3	RNA polymerase II-associated protein 3 OS=Mus musculus GN=Rpap3 PE=1 SV=1	21	14.4977	8.17353		0.778206	0.973854		-0.826793		0.00370977
sp|P43247|MSH2_MOUSE	Msh2	DNA mismatch repair protein Msh2 OS=Mus musculus GN=Msh2 PE=2 SV=1	29	17.499	7.82785		1.17147	1.50207		-1.16059		0.00371014
tr|E9Q2B2|E9Q2B2_MOUSE	Ncor1	Uncharacterized protein OS=Mus musculus GN=Ncor1 PE=4 SV=1	16	14.9431	9.09717		0.633646	0.965907		-0.715992		0.00372655
sp|P08103-2|HCK_MOUSE	Hck	Isoform p56-HCK of Tyrosine-protein kinase HCK OS=Mus musculus GN=Hck	3	15.2426	9.80168		0.896232	0.592554		-0.637005		0.00372785
sp|Q62203|SF3A2_MOUSE	Sf3a2	Splicing factor 3A subunit 2 OS=Mus musculus GN=Sf3a2 PE=2 SV=2	9	15.8302	8.46918		0.881698	1.1552		-0.902388		0.00372813
sp|Q9CRC8|LRC40_MOUSE	Lrrc40	Leucine-rich repeat-containing protein 40 OS=Mus musculus GN=Lrrc40 PE=2 SV=2	22	15.0588	8.02436		1.33445	0.389186		-0.908149		0.0037302
sp|Q9JIH2|NUP50_MOUSE	Nup50	Nuclear pore complex protein Nup50 OS=Mus musculus GN=Nup50 PE=1 SV=3	28	14.7286	6.96421		0.532814	1.43861		-1.08058		0.00373235
sp|A2AGH6-2|MED12_MOUSE	Med12	Isoform 2 of Mediator of RNA polymerase II transcription subunit 12 OS=Mus musculus GN=Med12	17	14.9574	9.24373		0.587827	0.964901		-0.694316		0.00373283
sp|P10629-2|HXC6_MOUSE	Hoxc6	Isoform PRI of Homeobox protein Hox-C6 OS=Mus musculus GN=Hoxc6	1	11.0714	2.05581		1.71591	0.494504		-2.42906		0.00374908
sp|P14152|MDHC_MOUSE	Mdh1	Malate dehydrogenase, cytoplasmic OS=Mus musculus GN=Mdh1 PE=1 SV=3	22	10.5259	15.0107		0.404183	0.791004		0.512043		0.00375247
sp|Q99LP6|GRPE1_MOUSE	Grpel1	GrpE protein homolog 1, mitochondrial OS=Mus musculus GN=Grpel1 PE=1 SV=1	13	14.5043	7.76282		1.12843	0.715362		-0.901824		0.00375374
sp|Q9CXK8|NIP7_MOUSE	Nip7	60S ribosome subunit biogenesis protein NIP7 homolog OS=Mus musculus GN=Nip7 PE=2 SV=1	7	15.5008	5.99715		1.64901	0.913393		-1.37		0.00375817
sp|Q99LW0|ANR10_MOUSE	Ankrd10	Ankyrin repeat domain-containing protein 10 OS=Mus musculus GN=Ankrd10 PE=2 SV=2	1	18.7429	6.10174		2.48438	0.344486		-1.61905		0.00375874
sp|Q99NB9|SF3B1_MOUSE	Sf3b1	Splicing factor 3B subunit 1 OS=Mus musculus GN=Sf3b1 PE=1 SV=1	51	15.1397	9.90305		0.146352	1.02823		-0.612388		0.00376048
sp|O35286|DHX15_MOUSE	Dhx15	Putative pre-mRNA-splicing factor ATP-dependent RNA helicase DHX15 OS=Mus musculus GN=Dhx15 PE=2 SV=2	45	15.745	8.74664		0.160109	1.38739		-0.84809		0.00376793
sp|Q6Y5D8-3|RHG10_MOUSE	Arhgap10	Isoform 3 of Rho GTPase-activating protein 10 OS=Mus musculus GN=Arhgap10	12	12.6452	7.87278		0.427244	0.852902		-0.683645		0.00376922
sp|Q80VY9|DHX33_MOUSE	Dhx33	Putative ATP-dependent RNA helicase DHX33 OS=Mus musculus GN=Dhx33 PE=1 SV=1	5	15.328	6.37407		1.68777	0.586706		-1.26589		0.00377138
sp|P83877|TXN4A_MOUSE	Txnl4a	Thioredoxin-like protein 4A OS=Mus musculus GN=Txnl4a PE=2 SV=1	4	13.4449	8.18152		0.797485	0.67651		-0.716614		0.00377154
sp|Q69ZX6|MOR2A_MOUSE	Morc2a	MORC family CW-type zinc finger protein 2A OS=Mus musculus GN=Morc2a PE=1 SV=2	13	16.4244	7.21504		1.70391	0.69655		-1.18676		0.00377271
sp|Q69ZA1|CDK13_MOUSE	Cdk13	Cyclin-dependent kinase 13 OS=Mus musculus GN=Cdk13 PE=1 SV=3	12	15.6876	9.80021		0.540941	1.04274		-0.678738		0.00377295
sp|Q9R190|MTA2_MOUSE	Mta2	Metastasis-associated protein MTA2 OS=Mus musculus GN=Mta2 PE=1 SV=1	33	17.7913	7.62845		1.74198	1.04103		-1.22171		0.00377299
sp|Q8CHT1-2|NGEF_MOUSE	Ngef	Isoform 2 of Ephexin-1 OS=Mus musculus GN=Ngef	1	7.26151	21.5393		0.705763	2.74738		1.56863		0.00377391
sp|P30999|CTND1_MOUSE	Ctnnd1	Catenin delta-1 OS=Mus musculus GN=Ctnnd1 PE=1 SV=2	56	8.1242	19.5198		0.890522	2.09624		1.26464		0.00377507
sp|Q8BTG7-2|NDRG4_MOUSE	Ndrg4	Isoform 2 of Protein NDRG4 OS=Mus musculus GN=Ndrg4	2	7.25505	23.2678		1.23757	2.9549		1.68128		0.00377509
sp|Q91WC0|SETD3_MOUSE	Setd3	Histone-lysine N-methyltransferase setd3 OS=Mus musculus GN=Setd3 PE=1 SV=1	14	9.40085	14.7073		0.749964	0.747326		0.645669		0.00377602
tr|E9Q2W5|E9Q2W5_MOUSE	Ythdf2	Uncharacterized protein OS=Mus musculus GN=Ythdf2 PE=4 SV=1	11	17.1509	7.38516		1.56174	1.17348		-1.21558		0.00377645
sp|Q922R5|P4R3B_MOUSE	Smek2	Serine/threonine-protein phosphatase 4 regulatory subunit 3B OS=Mus musculus GN=Smek2 PE=2 SV=2	9	15.846	8.41728		0.663463	1.31995		-0.912689		0.00377681
sp|Q99LN9-2|DOHH_MOUSE	Dohh	Isoform 2 of Deoxyhypusine hydroxylase OS=Mus musculus GN=Dohh	4	17.4825	5.57994		1.91436	1.39112		-1.64759		0.00377698
sp|Q6PFY1|FCSD1_MOUSE	Fchsd1	FCH and double SH3 domains protein 1 OS=Mus musculus GN=Fchsd1 PE=2 SV=1	1	7.16669	18.1838		0.95107	1.98944		1.34328		0.00377759
sp|Q61768|KINH_MOUSE	Kif5b	Kinesin-1 heavy chain OS=Mus musculus GN=Kif5b PE=1 SV=3	63	9.28287	14.9448		0.881077	0.710052		0.686998		0.00377841
sp|Q9EQ61|PESC_MOUSE	Pes1	Pescadillo homolog OS=Mus musculus GN=Pes1 PE=1 SV=1	24	14.2403	7.00595		1.17528	0.837176		-1.02332		0.00377914
sp|Q9D967|MGDP1_MOUSE	Mdp1	Magnesium-dependent phosphatase 1 OS=Mus musculus GN=Mdp1 PE=1 SV=1	3	7.24368	17.703		0.76638	1.94097		1.2892		0.00377936
sp|Q925I1|ATAD3_MOUSE	Atad3	ATPase family AAA domain-containing protein 3 OS=Mus musculus GN=Atad3 PE=1 SV=1	21	16.607	6.6469		1.85171	0.712891		-1.32104		0.00377983
sp|O35207|CDKA1_MOUSE	Cdk2ap1	Cyclin-dependent kinase 2-associated protein 1 OS=Mus musculus GN=Cdk2ap1 PE=3 SV=2	2	16.2052	6.38706		1.74951	0.871617		-1.34324		0.00378125
sp|Q497V5|SRBD1_MOUSE	Srbd1	S1 RNA-binding domain-containing protein 1 OS=Mus musculus GN=Srbd1 PE=1 SV=2	25	15.1944	8.28665		0.881864	1.06216		-0.874679		0.00378166
sp|Q9WUV0|ORC5_MOUSE	Orc5	Origin recognition complex subunit 5 OS=Mus musculus GN=Orc5 PE=2 SV=1	3	16.0996	5.00297		2.02694	0.888701		-1.68616		0.00378197
sp|P67778|PHB_MOUSE	Phb	Prohibitin OS=Mus musculus GN=Phb PE=1 SV=1	25	13.4347	8.81224		0.682473	0.616728		-0.608387		0.00378241
tr|B2RRD7|B2RRD7_MOUSE	Brpf1	Bromodomain and PHD finger containing, 1 OS=Mus musculus GN=Brpf1 PE=2 SV=1	4	16.0284	8.9451		1.02311	0.971741		-0.841461		0.00378295
sp|Q8BHA0|IN80C_MOUSE	Ino80c	INO80 complex subunit C OS=Mus musculus GN=Ino80c PE=2 SV=1	1	14.6523	9.79653		0.839243	0.47962		-0.580784		0.003784
sp|Q8BFQ4|WDR82_MOUSE	Wdr82	WD repeat-containing protein 82 OS=Mus musculus GN=Wdr82 PE=1 SV=1	14	15.1758	9.91551		0.212083	1.02746		-0.614011		0.00378521
sp|O54825|BYST_MOUSE	Bysl	Bystin OS=Mus musculus GN=Bysl PE=1 SV=3	14	15.5628	5.73744		1.94102	0.251042		-1.43962		0.00378601
sp|Q8BP92|RCN2_MOUSE	Rcn2	Reticulocalbin-2 OS=Mus musculus GN=Rcn2 PE=2 SV=1	31	11.0705	18.0306		0.543326	1.27727		0.70372		0.00378785
sp|Q9WV86|KTNA1_MOUSE	Katna1	Katanin p60 ATPase-containing subunit A1 OS=Mus musculus GN=Katna1 PE=1 SV=1	5	15.0596	10.165		0.82545	0.529447		-0.567079		0.00378849
tr|F6UFZ5|F6UFZ5_MOUSE	Pcf11	Uncharacterized protein (Fragment) OS=Mus musculus GN=Pcf11 PE=4 SV=1	11	15.3374	8.63909		0.865951	1.0262		-0.828105		0.0037889
sp|O70477|PKNX1_MOUSE	Pknox1	Homeobox protein PKNOX1 OS=Mus musculus GN=Pknox1 PE=2 SV=3	3	17.0052	7.02076		1.87149	0.67958		-1.27628		0.00379062
sp|P59708|PM14_MOUSE	Sf3b14	Pre-mRNA branch site protein p14 OS=Mus musculus GN=Sf3b14 PE=2 SV=1	5	16.0944	7.34497		1.60121	0.715692		-1.13173		0.00379239
sp|Q9Z148-2|EHMT2_MOUSE	Ehmt2	Isoform 2 of Histone-lysine N-methyltransferase EHMT2 OS=Mus musculus GN=Ehmt2	10	15.9467	8.70168		0.907085	1.13698		-0.873895		0.00380678
tr|F7CVJ5|F7CVJ5_MOUSE	Ahnak2	Uncharacterized protein (Fragment) OS=Mus musculus GN=Ahnak2 PE=4 SV=1	4	3.59732	23.1854		0.309736	3.92151		2.68823		0.00380792
sp|Q9DB90|SMG9_MOUSE	Smg9	Protein SMG9 OS=Mus musculus GN=Smg9 PE=2 SV=1	5	13.817	9.67187		0.682737	0.478449		-0.514575		0.00380813
sp|Q9CSH3|RRP44_MOUSE	Dis3	Exosome complex exonuclease RRP44 OS=Mus musculus GN=Dis3 PE=2 SV=4	41	15.901	6.82995		0.83643	1.61917		-1.21917		0.00381046
sp|P70191|TRAF5_MOUSE	Traf5	TNF receptor-associated factor 5 OS=Mus musculus GN=Traf5 PE=1 SV=1	3	13.0883	5.68315		1.16498	0.927786		-1.20352		0.00381078
sp|Q6NXH3-2|GPBP1_MOUSE	Gpbp1	Isoform 2 of Vasculin OS=Mus musculus GN=Gpbp1	2	14.9245	9.41056		1.06665	0.300479		-0.665331		0.0038117
sp|P54103|DNJC2_MOUSE	Dnajc2	DnaJ homolog subfamily C member 2 OS=Mus musculus GN=Dnajc2 PE=1 SV=2	18	13.9173	8.76807		0.571502	0.863386		-0.666545		0.00381197
sp|Q8R1K4-2|AT2L2_MOUSE	Agxt2l2	Isoform 2 of Alanine--glyoxylate aminotransferase 2-like 2 OS=Mus musculus GN=Agxt2l2	3	8.91661	18.172		1.03423	1.55201		1.02715		0.00381386
sp|Q3V300|KIF22_MOUSE	Kif22	Kinesin-like protein KIF22 OS=Mus musculus GN=Kif22 PE=2 SV=2	11	16.8438	8.14924		0.231391	1.73278		-1.04748		0.00381446
sp|Q8BWR4-2|UBP40_MOUSE	Usp40	Isoform 2 of Ubiquitin carboxyl-terminal hydrolase 40 OS=Mus musculus GN=Usp40	6	9.33773	17.352		0.944162	1.30934		0.893961		0.00381492
tr|E9Q9V7|E9Q9V7_MOUSE	Srcap	Uncharacterized protein OS=Mus musculus GN=Srcap PE=4 SV=1	6	16.8188	7.62772		1.26884	1.34911		-1.14075		0.0038172
sp|Q922U1|PRPF3_MOUSE	Prpf3	U4/U6 small nuclear ribonucleoprotein Prp3 OS=Mus musculus GN=Prpf3 PE=1 SV=1	23	16.6129	7.62383		0.606068	1.70607		-1.12371		0.00381805
sp|Q3UMC0|SPAT5_MOUSE	Spata5	Spermatogenesis-associated protein 5 OS=Mus musculus GN=Spata5 PE=2 SV=2	28	14.2014	8.1041		1.13604	0.466128		-0.80931		0.00382007
sp|Q3U3C9-2|GSE1_MOUSE	Gse1	Isoform 2 of Genetic suppressor element 1 OS=Mus musculus GN=Gse1	4	16.4449	7.64569		0.654277	1.64678		-1.10492		0.00382298
tr|Q3TZR9|Q3TZR9_MOUSE	Atf7	Activating transcription factor 7, isoform CRA_a OS=Mus musculus GN=Atf7 PE=2 SV=1	6	15.2701	7.87012		1.33939	0.659463		-0.956249		0.00382778
sp|A2AQ19|RTF1_MOUSE	Rtf1	RNA polymerase-associated protein RTF1 homolog OS=Mus musculus GN=Rtf1 PE=2 SV=1	18	15.9677	9.4278		1.00007	0.863449		-0.76016		0.00384448
sp|Q9CPW4|ARPC5_MOUSE	Arpc5	Actin-related protein 2/3 complex subunit 5 OS=Mus musculus GN=Arpc5 PE=2 SV=3	20	10.1008	16.4291		0.595971	1.13276		0.701787		0.00385409
sp|Q9D8V0|HM13_MOUSE	Hm13	Minor histocompatibility antigen H13 OS=Mus musculus GN=Hm13 PE=1 SV=1	5	7.92591	16.3814		0.695446	1.56199		1.04741		0.00385418
sp|Q3UDE2|TTL12_MOUSE	Ttll12	Tubulin--tyrosine ligase-like protein 12 OS=Mus musculus GN=Ttll12 PE=1 SV=1	29	15.8418	7.68764		1.49493	0.699571		-1.04312		0.00385806
sp|O70546-2|KDM6A_MOUSE	Kdm6a	Isoform 2 of Lysine-specific demethylase 6A OS=Mus musculus GN=Kdm6a	2	17.1104	8.76589		1.25595	1.13076		-0.964904		0.00385875
tr|E9Q7L1|E9Q7L1_MOUSE	Urb2	Uncharacterized protein OS=Mus musculus GN=Urb2 PE=4 SV=1	17	14.7562	7.9535		1.3176	0.401482		-0.891662		0.00385903
tr|E9Q7E2|E9Q7E2_MOUSE	Arid2	Uncharacterized protein OS=Mus musculus GN=Arid2 PE=4 SV=1	14	14.4322	7.65476		0.790865	1.12075		-0.914859		0.00386005
sp|Q9DAW9|CNN3_MOUSE	Cnn3	Calponin-3 OS=Mus musculus GN=Cnn3 PE=2 SV=1	32	11.2193	15.2898		0.454011	0.689447		0.44659		0.0038643
sp|Q91XV3|BASP1_MOUSE	Basp1	Brain acid soluble protein 1 OS=Mus musculus GN=Basp1 PE=1 SV=3	16	14.8799	4.32422		1.05353	1.86339		-1.78286		0.00386717
sp|Q9CWM4|PFD1_MOUSE	Pfdn1	Prefoldin subunit 1 OS=Mus musculus GN=Pfdn1 PE=2 SV=1	4	16.6526	7.58433		1.46538	1.11047		-1.13466		0.00386796
sp|Q9CXW2|RT22_MOUSE	Mrps22	28S ribosomal protein S22, mitochondrial OS=Mus musculus GN=Mrps22 PE=2 SV=1	17	14.1747	8.88534		0.92162	0.553147		-0.67382		0.00386904
sp|Q6GQV7|EDRF1_MOUSE	Edrf1	Erythroid differentiation-related factor 1 OS=Mus musculus GN=Edrf1 PE=2 SV=1	2	13.4387	9.69819		0.567206	0.503432		-0.470609		0.00387157
tr|E9Q9B3|E9Q9B3_MOUSE	Spryd3	Uncharacterized protein OS=Mus musculus GN=Spryd3 PE=4 SV=1	2	10.4083	16.2199		0.339496	1.1311		0.640035		0.00387195
sp|Q9R0Y5-2|KAD1_MOUSE	Ak1	Isoform 2 of Adenylate kinase isoenzyme 1 OS=Mus musculus GN=Ak1	18	7.31058	21.1136		0.854214	2.66808		1.53011		0.0038724
tr|Q99K73|Q99K73_MOUSE	Nrf1	Nrf1 protein OS=Mus musculus GN=Nrf1 PE=2 SV=1	1	17.4899	7.2122		1.34136	1.60046		-1.27801		0.00387394
sp|P84089|ERH_MOUSE	Erh	Enhancer of rudimentary homolog OS=Mus musculus GN=Erh PE=1 SV=1	7	16.9249	5.73955		2.11419	0.829733		-1.56014		0.00387517
sp|Q9Z255|UBE2A_MOUSE	Ube2a	Ubiquitin-conjugating enzyme E2 A OS=Mus musculus GN=Ube2a PE=2 SV=1	4	16.4707	8.48372		1.30782	0.960703		-0.957132		0.0038771
sp|Q99JY9|ARP3_MOUSE	Actr3	Actin-related protein 3 OS=Mus musculus GN=Actr3 PE=1 SV=3	31	10.3664	15.2172		0.759231	0.62816		0.553786		0.00387831
sp|Q922B2|SYDC_MOUSE	Dars	Aspartyl-tRNA synthetase, cytoplasmic OS=Mus musculus GN=Dars PE=2 SV=2	41	10.8895	14.6179		0.558957	0.513234		0.424794		0.00388862
sp|Q6PAQ4|REXO4_MOUSE	Rexo4	RNA exonuclease 4 OS=Mus musculus GN=Rexo4 PE=2 SV=2	16	12.9807	6.81412		0.936611	0.836026		-0.929773		0.00388919
sp|Q91YT0|NDUV1_MOUSE	Ndufv1	NADH dehydrogenase [ubiquinone] flavoprotein 1, mitochondrial OS=Mus musculus GN=Ndufv1 PE=1 SV=1	13	7.89214	17.3027		1.5386	1.14345		1.13251		0.00389034
sp|Q9WU62-2|INCE_MOUSE	Incenp	Isoform 2 of Inner centromere protein OS=Mus musculus GN=Incenp	8	19.1244	7.37985		1.87905	1.48181		-1.37375		0.00389049
sp|Q8VE97|SRSF4_MOUSE	Srsf4	Serine/arginine-rich splicing factor 4 OS=Mus musculus GN=Srsf4 PE=2 SV=1	9	17.7669	8.82681		0.389485	1.77876		-1.00923		0.00389207
sp|Q921Y2|IMP3_MOUSE	Imp3	U3 small nucleolar ribonucleoprotein protein IMP3 OS=Mus musculus GN=Imp3 PE=2 SV=1	5	16.083	6.02178		2.04796	0.140007		-1.41727		0.00389211
sp|Q9JIK5|DDX21_MOUSE	Ddx21	Nucleolar RNA helicase 2 OS=Mus musculus GN=Ddx21 PE=1 SV=3	78	15.7235	7.01311		0.796381	1.58839		-1.1648		0.00389326
sp|Q6DYE8|ENPP3_MOUSE	Enpp3	Ectonucleotide pyrophosphatase/phosphodiesterase family member 3 OS=Mus musculus GN=Enpp3 PE=1 SV=2	3	0.588463	4.34398		0.402461	0.653672		2.88399		0.00389437
tr|Q6PAJ0|Q6PAJ0_MOUSE	Sclt1	Sclt1 protein OS=Mus musculus GN=Sclt1 PE=2 SV=1	2	15.4659	9.21397		1.07986	0.682941		-0.747197		0.00389546
sp|Q9CQ40|RM49_MOUSE	Mrpl49	39S ribosomal protein L49, mitochondrial OS=Mus musculus GN=Mrpl49 PE=2 SV=1	1	16.071	7.15861		1.76137	0.450015		-1.16671		0.00389594
sp|Q921M3|SF3B3_MOUSE	Sf3b3	Splicing factor 3B subunit 3 OS=Mus musculus GN=Sf3b3 PE=2 SV=1	48	14.5575	10.4187		0.204408	0.821857		-0.482592		0.00389602
sp|Q9ESX5|DKC1_MOUSE	Dkc1	H/ACA ribonucleoprotein complex subunit 4 OS=Mus musculus GN=Dkc1 PE=1 SV=4	24	17.1832	7.19458		1.67949	1.16236		-1.25602		0.00389654
sp|Q8K301|DDX52_MOUSE	Ddx52	Probable ATP-dependent RNA helicase DDX52 OS=Mus musculus GN=Ddx52 PE=2 SV=2	13	14.7479	7.91765		0.607524	1.25355		-0.897369		0.00389712
sp|Q8K2L8|TTC15_MOUSE	Ttc15	Tetratricopeptide repeat protein 15 OS=Mus musculus GN=Ttc15 PE=1 SV=2	14	8.61229	16.3218		0.545022	1.47447		0.922328		0.00389749
sp|Q69ZK6|JHD2C_MOUSE	Jmjd1c	Probable JmjC domain-containing histone demethylation protein 2C OS=Mus musculus GN=Jmjd1c PE=1 SV=3	7	17.7344	6.78196		1.83253	1.2887		-1.38677		0.00389783
sp|Q8CFQ3|AQR_MOUSE	Aqr	Intron-binding protein aquarius OS=Mus musculus GN=Aqr PE=2 SV=2	15	15.0262	9.63079		0.593996	0.928893		-0.641757		0.00389799
sp|Q91ZW3|SMCA5_MOUSE	Smarca5	SWI/SNF-related matrix-associated actin-dependent regulator of chromatin subfamily A member 5 OS=Mus musculus GN=Smarca5 PE=1 SV=1	53	16.3364	7.42903		1.46543	1.07901		-1.13684		0.00389805
tr|Q8BIZ8|Q8BIZ8_MOUSE	Scaper	Uncharacterized protein OS=Mus musculus GN=Scaper PE=2 SV=1	1	11.7497	16.0383		0.85375	0.202798		0.448898		0.00389905
sp|Q61029-4|LAP2B_MOUSE	Tmpo	Isoform Gamma of Lamina-associated polypeptide 2, isoforms beta/delta/epsilon/gamma OS=Mus musculus GN=Tmpo	1	19.2142	7.49891		2.36011	0.395848		-1.35742		0.00389909
sp|P70428|EXT2_MOUSE	Ext2	Exostosin-2 OS=Mus musculus GN=Ext2 PE=1 SV=2	12	11.727	15.3607		0.662706	0.334105		0.389417		0.00390056
sp|Q99L43|CDS2_MOUSE	Cds2	Phosphatidate cytidylyltransferase 2 OS=Mus musculus GN=Cds2 PE=1 SV=1	4	8.85864	18.8783		1.15851	1.69367		1.09157		0.00390171
sp|Q8C1A5|THOP1_MOUSE	Thop1	Thimet oligopeptidase OS=Mus musculus GN=Thop1 PE=1 SV=1	31	12.8895	10.6995		0.336324	0.294753		-0.268645		0.00390193
sp|Q9CYC6|DCP2_MOUSE	Dcp2	mRNA-decapping enzyme 2 OS=Mus musculus GN=Dcp2 PE=1 SV=2	4	13.1266	8.84944		0.547134	0.683906		-0.568839		0.00390314
sp|Q8R2S9|ARP8_MOUSE	Actr8	Actin-related protein 8 OS=Mus musculus GN=Actr8 PE=2 SV=1	7	15.0955	9.33259		0.161481	1.16954		-0.693765		0.0039034
tr|E9Q3X0|E9Q3X0_MOUSE	Mvp	Uncharacterized protein OS=Mus musculus GN=Mvp PE=4 SV=1	33	8.9464	18.1165		0.694788	1.74803		1.01793		0.00390444
sp|Q8CIM8|INT4_MOUSE	Ints4	Integrator complex subunit 4 OS=Mus musculus GN=Ints4 PE=2 SV=1	13	15.0321	7.76941		0.831507	1.23448		-0.952167		0.00390489
sp|P52480|KPYM_MOUSE	Pkm2	Pyruvate kinase isozymes M1/M2 OS=Mus musculus GN=Pkm2 PE=1 SV=4	15	15.5031	8.97974		1.20402	0.583304		-0.787814		0.00390512
sp|Q8VH51-2|RBM39_MOUSE	Rbm39	Isoform 2 of RNA-binding protein 39 OS=Mus musculus GN=Rbm39	26	14.92	9.47417		0.235746	1.09127		-0.655179		0.00390633
sp|Q9D1P0|RM13_MOUSE	Mrpl13	39S ribosomal protein L13, mitochondrial OS=Mus musculus GN=Mrpl13 PE=2 SV=1	8	14.3705	8.89862		1.10823	0.175541		-0.691454		0.00390639
sp|P0C0S6|H2AZ_MOUSE	H2afz	Histone H2A.Z OS=Mus musculus GN=H2afz PE=1 SV=2	25	18.9278	5.58336		2.46706	1.18863		-1.7613		0.00390709
sp|Q61188-2|EZH2_MOUSE	Ezh2	Isoform ENX-1B of Histone-lysine N-methyltransferase EZH2 OS=Mus musculus GN=Ezh2	3	17.0595	6.92743		1.42773	1.51301		-1.30019		0.0039111
sp|Q8BIJ6|SYIM_MOUSE	Iars2	Isoleucyl-tRNA synthetase, mitochondrial OS=Mus musculus GN=Iars2 PE=2 SV=1	31	9.28738	17.4741		0.553365	1.59046		0.911871		0.00393523
sp|Q8BZW8|NHLC2_MOUSE	Nhlrc2	NHL repeat-containing protein 2 OS=Mus musculus GN=Nhlrc2 PE=2 SV=1	21	14.2292	11.4154		0.373297	0.442823		-0.317873		0.00394163
tr|D3YXK2|D3YXK2_MOUSE	Safb	MCG127409 OS=Mus musculus GN=Safb PE=4 SV=2	22	16.3544	9.0077		0.787392	1.29165		-0.860448		0.00394333
sp|Q61286-2|HTF4_MOUSE	Tcf12	Isoform ALF1A of Transcription factor 12 OS=Mus musculus GN=Tcf12	3	15.3053	8.4053		0.923444	1.08028		-0.86466		0.00394433
sp|Q60992|VAV2_MOUSE	Vav2	Guanine nucleotide exchange factor VAV2 OS=Mus musculus GN=Vav2 PE=1 SV=1	3	10.618	14.7629		0.322319	0.791279		0.475461		0.00394953
sp|Q9DBS5|KLC4_MOUSE	Klc4	Kinesin light chain 4 OS=Mus musculus GN=Klc4 PE=1 SV=1	9	10.1056	15.7859		1.00261	0.604431		0.643476		0.00395059
sp|P69566|RANB9_MOUSE	Ranbp9	Ran-binding protein 9 OS=Mus musculus GN=Ranbp9 PE=1 SV=1	15	14.2992	10.2349		0.432679	0.717865		-0.482427		0.00395305
sp|Q9R0P9|UCHL1_MOUSE	Uchl1	Ubiquitin carboxyl-terminal hydrolase isozyme L1 OS=Mus musculus GN=Uchl1 PE=1 SV=1	13	23.7036	4.09207		3.94876	0.888069		-2.5342		0.00395657
sp|Q9Z1X2-2|PTSS2_MOUSE	Ptdss2	Isoform 2 of Phosphatidylserine synthase 2 OS=Mus musculus GN=Ptdss2	3	8.69234	15.575		0.645616	1.26487		0.841416		0.00395672
sp|Q4FK66|PR38A_MOUSE	Prpf38a	Pre-mRNA-splicing factor 38A OS=Mus musculus GN=Prpf38a PE=1 SV=1	5	16.5555	8.21961		1.69431	0.316592		-1.01017		0.00395699
sp|Q9CZT8|RAB3B_MOUSE	Rab3b	Ras-related protein Rab-3B OS=Mus musculus GN=Rab3b PE=1 SV=1	4	25.4078	4.42127		3.8528	1.98643		-2.52274		0.00395837
sp|Q61687|ATRX_MOUSE	Atrx	Transcriptional regulator ATRX OS=Mus musculus GN=Atrx PE=1 SV=3	47	16.5716	8.17729		1.24103	1.20972		-1.01902		0.00395898
sp|P37172|ACVR1_MOUSE	Acvr1	Activin receptor type-1 OS=Mus musculus GN=Acvr1 PE=2 SV=2	4	13.4664	10.1533		0.63264	0.262674		-0.407405		0.00395972
sp|Q8K2B0|SC65_MOUSE	Leprel4	Synaptonemal complex protein SC65 OS=Mus musculus GN=Leprel4 PE=2 SV=1	13	6.70491	22.4136		0.712986	3.17034		1.74109		0.0039599
sp|P31750|AKT1_MOUSE	Akt1	RAC-alpha serine/threonine-protein kinase OS=Mus musculus GN=Akt1 PE=1 SV=2	19	9.55312	16.6402		0.927192	1.13249		0.800626		0.00395996
tr|Q3ULB0|Q3ULB0_MOUSE	Rbm6	Uncharacterized protein OS=Mus musculus GN=Rbm6 PE=2 SV=1	14	16.5371	9.46554		0.92323	1.13513		-0.804947		0.00395997
sp|P98199|AT8B2_MOUSE	Atp8b2	Probable phospholipid-transporting ATPase ID OS=Mus musculus GN=Atp8b2 PE=2 SV=2	5	9.2435	16.9519		1.0271	1.21783		0.874936		0.00396042
tr|E9Q2V4|E9Q2V4_MOUSE	Taf4a	Uncharacterized protein OS=Mus musculus GN=Taf4a PE=4 SV=1	5	15.3268	9.14127		0.722212	1.05457		-0.745589		0.0039613
sp|O54833|CSK22_MOUSE	Csnk2a2	Casein kinase II subunit alpha' OS=Mus musculus GN=Csnk2a2 PE=2 SV=1	8	14.6953	9.94917		0.522966	0.830214		-0.56271		0.00396131
sp|P19426-2|NELFE_MOUSE	Rdbp	Isoform 2 of Negative elongation factor E OS=Mus musculus GN=Rdbp	7	14.795	9.6285		0.63323	0.861718		-0.619726		0.00396156
sp|Q60866|PTER_MOUSE	Pter	Phosphotriesterase-related protein OS=Mus musculus GN=Pter PE=2 SV=1	6	3.74832	12.9084		0.649313	1.78594		1.784		0.00399283
sp|Q922M5|CDA7L_MOUSE	Cdca7l	Cell division cycle-associated 7-like protein OS=Mus musculus GN=Cdca7l PE=2 SV=1	2	16.2804	7.66884		1.05691	1.44131		-1.08606		0.00399591
sp|Q3UDW8-2|HGNAT_MOUSE	Hgsnat	Isoform 2 of Heparan-alpha-glucosaminide N-acetyltransferase OS=Mus musculus GN=Hgsnat	1	8.74341	20.6704		0.732702	2.36567		1.2413		0.0039994
sp|P62305|RUXE_MOUSE	Snrpe	Small nuclear ribonucleoprotein E OS=Mus musculus GN=Snrpe PE=2 SV=1	3	16.0915	8.14998		1.5268	0.628718		-0.981431		0.00400907
sp|Q8BGS2|BOLA2_MOUSE	Bola2	BolA-like protein 2 OS=Mus musculus GN=Bola2 PE=1 SV=1	5	13.1487	10.0397		0.582894	0.279119		-0.389206		0.00400928
sp|Q9JI59|JAM2_MOUSE	Jam2	Junctional adhesion molecule B OS=Mus musculus GN=Jam2 PE=1 SV=1	2	4.11679	19.3007		0.737853	3.07049		2.22907		0.00400981
sp|Q9DBU0|TM9S1_MOUSE	Tm9sf1	Transmembrane 9 superfamily member 1 OS=Mus musculus GN=Tm9sf1 PE=2 SV=2	5	8.0764	14.9608		1.03213	0.993339		0.889399		0.00401017
sp|Q9JLI8|SART3_MOUSE	Sart3	Squamous cell carcinoma antigen recognized by T-cells 3 OS=Mus musculus GN=Sart3 PE=2 SV=1	32	15.11	9.16575		1.12742	0.505634		-0.721175		0.00401257
tr|E9Q5C9|E9Q5C9_MOUSE	Nolc1	Uncharacterized protein OS=Mus musculus GN=Nolc1 PE=4 SV=1	31	16.5536	6.6997		1.32503	1.56465		-1.30498		0.00401327
sp|P14602-2|HSPB1_MOUSE	Hspb1	Isoform B of Heat shock protein beta-1 OS=Mus musculus GN=Hspb1	12	19.0537	1.9378		3.56544	0.136894		-3.29758		0.00402099
sp|Q9DBT5|AMPD2_MOUSE	Ampd2	AMP deaminase 2 OS=Mus musculus GN=Ampd2 PE=1 SV=1	18	16.1078	8.22024		1.42853	0.811362		-0.970506		0.00402197
sp|Q9WTM5|RUVB2_MOUSE	Ruvbl2	RuvB-like 2 OS=Mus musculus GN=Ruvbl2 PE=2 SV=3	31	13.064	9.51735		0.55076	0.49361		-0.456968		0.00402213
sp|Q6NXY1|WDR67_MOUSE	Wdr67	WD repeat-containing protein 67 OS=Mus musculus GN=Wdr67 PE=2 SV=1	4	10.9751	6.01382		0.332365	0.979985		-0.86788		0.00402216
sp|Q9CXH7|SGOL1_MOUSE	Sgol1	Shugoshin-like 1 OS=Mus musculus GN=Sgol1 PE=2 SV=1	5	18.3035	7.51415		2.02078	0.987423		-1.28444		0.00402394
sp|P63254|CRIP1_MOUSE	Crip1	Cysteine-rich protein 1 OS=Mus musculus GN=Crip1 PE=2 SV=2	1	10.9819	1.18377		2.04085	0.0781971		-3.21367		0.00402641
sp|Q61771|KIF3B_MOUSE	Kif3b	Kinesin-like protein KIF3B OS=Mus musculus GN=Kif3b PE=1 SV=1	4	10.1971	15.9429		0.497354	1.08943		0.64475		0.00402908
sp|A2APB8|TPX2_MOUSE	Tpx2	Targeting protein for Xklp2 OS=Mus musculus GN=Tpx2 PE=1 SV=1	31	16.0959	8.91425		0.997165	1.1203		-0.852504		0.0040379
sp|Q9DC11|PXDC2_MOUSE	Plxdc2	Plexin domain-containing protein 2 OS=Mus musculus GN=Plxdc2 PE=1 SV=1	5	4.67898	24.1535		2.17145	3.44078		2.36797		0.00404055
sp|Q8CHI8-2|EP400_MOUSE	Ep400	Isoform 2 of E1A-binding protein p400 OS=Mus musculus GN=Ep400	13	15.1309	8.84796		1.0315	0.813044		-0.774078		0.0040424
sp|Q7TPD2|F185A_MOUSE	Fam185a	Protein FAM185A OS=Mus musculus GN=Fam185a PE=2 SV=1	3	12.4536	8.85115		0.694797	0.290288		-0.492625		0.00404448
sp|Q8VC51|WAP53_MOUSE	Wrap53	Telomerase Cajal body protein 1 OS=Mus musculus GN=Wrap53 PE=2 SV=1	3	15.0743	8.02111		1.22235	0.826999		-0.910218		0.0040535
sp|Q9Z2U2-2|ZN292_MOUSE	Zfp292	Isoform 2 of Zinc finger protein 292 OS=Mus musculus GN=Zfp292	6	20.4819	5.74976		3.08338	0.180182		-1.83277		0.00405555
sp|Q3TMW1|C102A_MOUSE	Ccdc102a	Coiled-coil domain-containing protein 102A OS=Mus musculus GN=Ccdc102a PE=2 SV=2	15	11.106	15.4866		0.559145	0.728486		0.479682		0.00405779
sp|Q6PGC1|DHX29_MOUSE	Dhx29	ATP-dependent RNA helicase Dhx29 OS=Mus musculus GN=Dhx29 PE=2 SV=1	38	8.0553	16.0765		0.0989156	1.67828		0.996944		0.0040582
sp|Q60973|RBBP7_MOUSE	Rbbp7	Histone-binding protein RBBP7 OS=Mus musculus GN=Rbbp7 PE=1 SV=1	18	16.0304	7.73606		0.748763	1.56853		-1.05114		0.00405854
sp|Q9Z139|ROR1_MOUSE	Ror1	Tyrosine-protein kinase transmembrane receptor ROR1 OS=Mus musculus GN=Ror1 PE=2 SV=2	1	7.69806	23.7825		3.30866	0.640557		1.62734		0.00406014
sp|Q6A068|CDC5L_MOUSE	Cdc5l	Cell division cycle 5-related protein OS=Mus musculus GN=Cdc5l PE=1 SV=2	38	15.5589	9.14257		0.37129	1.29187		-0.767068		0.00406125
sp|Q9D198|SYF2_MOUSE	Syf2	Pre-mRNA-splicing factor SYF2 OS=Mus musculus GN=Syf2 PE=2 SV=1	2	16.8893	8.12059		1.26954	1.32712		-1.05645		0.00406139
tr|Q91XW9|Q91XW9_MOUSE	Pcdhgc5	MCG133388, isoform CRA_f OS=Mus musculus GN=Pcdhgc5 PE=2 SV=1	3	7.27261	17.6433		1.69029	1.3637		1.27858		0.00406289
sp|P70347-2|TANK_MOUSE	Tank	Isoform 2 of TRAF family member-associated NF-kappa-B activator OS=Mus musculus GN=Tank	4	16.7041	9.54573		1.46434	0.340851		-0.807277		0.00407285
sp|Q8BVM4|ADC_MOUSE	Adc	Antizyme inhibitor 2 OS=Mus musculus GN=Adc PE=2 SV=1	2	17.3574	6.80556		1.45128	1.67362		-1.35076		0.00407298
sp|Q68G58-2|APEX2_MOUSE	Apex2	Isoform 2 of DNA-(apurinic or apyrimidinic site) lyase 2 OS=Mus musculus GN=Apex2	2	18.7246	5.77142		2.70103	0.325272		-1.69794		0.00407624
tr|E9Q459|E9Q459_MOUSE	Zfp160	Uncharacterized protein OS=Mus musculus GN=Zfp160 PE=4 SV=1	1	17.2155	7.74842		1.67503	1.07524		-1.15174		0.00407831
sp|P62311|LSM3_MOUSE	Lsm3	U6 snRNA-associated Sm-like protein LSm3 OS=Mus musculus GN=Lsm3 PE=2 SV=2	5	18.0987	5.88964		2.3548	1.02168		-1.61963		0.00408162
sp|Q7TMQ7|WDR91_MOUSE	Wdr91	WD repeat-containing protein 91 OS=Mus musculus GN=Wdr91 PE=1 SV=1	13	9.27657	17.4532		0.788354	1.52765		0.911825		0.00408504
tr|E9PUB7|E9PUB7_MOUSE	Msto1	Uncharacterized protein OS=Mus musculus GN=Msto1 PE=4 SV=1	13	14.5306	7.92827		1.04101	0.919697		-0.874013		0.00408556
sp|O70281|TPST1_MOUSE	Tpst1	Protein-tyrosine sulfotransferase 1 OS=Mus musculus GN=Tpst1 PE=2 SV=1	5	10.609	14.928		0.478287	0.775507		0.492732		0.00412408
sp|Q91VY5-2|KDM4B_MOUSE	Kdm4b	Isoform 2 of Lysine-specific demethylase 4B OS=Mus musculus GN=Kdm4b	2	19.8233	6.55923		2.06071	1.89496		-1.5956		0.0041281
sp|Q9QZD8|DIC_MOUSE	Slc25a10	Mitochondrial dicarboxylate carrier OS=Mus musculus GN=Slc25a10 PE=2 SV=2	7	15.9204	8.7503		1.05505	1.08559		-0.863472		0.00412959
sp|Q60902-3|EP15R_MOUSE	Eps15l1	Isoform 3 of Epidermal growth factor receptor substrate 15-like 1 OS=Mus musculus GN=Eps15l1	25	11.7335	15.5508		0.36229	0.720142		0.406348		0.00413008
sp|P63280|UBC9_MOUSE	Ube2i	SUMO-conjugating enzyme UBC9 OS=Mus musculus GN=Ube2i PE=1 SV=1	6	18.8	6.68009		1.98502	1.6204		-1.49279		0.00413728
sp|Q9JHD2|KAT2A_MOUSE	Kat2a	Histone acetyltransferase KAT2A OS=Mus musculus GN=Kat2a PE=1 SV=2	5	16.5154	7.81823		1.69518	0.71155		-1.0789		0.00413813
sp|Q9ERB0|SNP29_MOUSE	Snap29	Synaptosomal-associated protein 29 OS=Mus musculus GN=Snap29 PE=1 SV=1	9	10.8061	16.5436		0.744605	0.957343		0.614431		0.00414147
sp|Q8BT60|CPNE3_MOUSE	Cpne3	Copine-3 OS=Mus musculus GN=Cpne3 PE=1 SV=2	17	14.8022	11.5535		0.649876	0.224		-0.357483		0.00414627
sp|P62325|BTG1_MOUSE	Btg1	Protein BTG1 OS=Mus musculus GN=Btg1 PE=2 SV=1	1	22.7485	3.06716		4.10162	0.729104		-2.8908		0.00414845
tr|E9PUU7|E9PUU7_MOUSE	Flrt2	Uncharacterized protein OS=Mus musculus GN=Flrt2 PE=4 SV=1	8	2.83603	23.443		0.154919	4.36168		3.04721		0.00415432
tr|D3Z3R1|D3Z3R1_MOUSE	Gm5745	60S ribosomal protein L36 OS=Mus musculus GN=Gm5745 PE=3 SV=1	17	13.9127	9.23826		0.172209	0.975883		-0.590705		0.00415881
sp|Q6KAQ7|ZZZ3_MOUSE	Zzz3	ZZ-type zinc finger-containing protein 3 OS=Mus musculus GN=Zzz3 PE=2 SV=2	1	15.956	7.00804		1.35061	1.33503		-1.18701		0.00415882
sp|Q8K5B8|HXC12_MOUSE	Hoxc12	Homeobox protein Hox-C12 OS=Mus musculus GN=Hoxc12 PE=2 SV=1	1	32.7085	0.325664		6.86296	0.133004		-6.65014		0.00416048
tr|B2LVG5|B2LVG5_MOUSE	Cpsf4	Cleavage and polyadenylation specific factor 4 isoform 1 OS=Mus musculus GN=Cpsf4 PE=2 SV=1	8	14.2056	8.01015		1.25726	0.378525		-0.826558		0.00416091
sp|Q9D1D6|CTHR1_MOUSE	Cthrc1	Collagen triple helix repeat-containing protein 1 OS=Mus musculus GN=Cthrc1 PE=2 SV=1	1	3.05582	28.3303		0.436501	5.34613		3.21272		0.00416173
sp|O88513|GEMI_MOUSE	Gmnn	Geminin OS=Mus musculus GN=Gmnn PE=1 SV=1	1	17.8632	8.69123		1.09336	1.61326		-1.03936		0.00416291
sp|Q8BMD6-2|CN101_MOUSE		Isoform 2 of UPF0679 protein C14orf101 homolog OS=Mus musculus	2	7.8358	19.2677		1.31126	2.04542		1.29803		0.00416339
sp|P97452|BOP1_MOUSE	Bop1	Ribosome biogenesis protein BOP1 OS=Mus musculus GN=Bop1 PE=1 SV=1	19	14.8118	6.49016		1.69997	0.492615		-1.19043		0.00416425
sp|Q99K30|ES8L2_MOUSE	Eps8l2	Epidermal growth factor receptor kinase substrate 8-like protein 2 OS=Mus musculus GN=Eps8l2 PE=1 SV=1	10	3.75707	28.597		0.866198	5.20938		2.92818		0.00416471
sp|P58771|TPM1_MOUSE	Tpm1	Tropomyosin alpha-1 chain OS=Mus musculus GN=Tpm1 PE=1 SV=1	1	19.5644	6.64564		0.590854	2.67718		-1.55775		0.00416476
tr|D3YW09|D3YW09_MOUSE	Sf3a2	Splicing factor 3a, subunit 2, isoform CRA_c OS=Mus musculus GN=Sf3a2 PE=4 SV=1	1	15.9811	8.94231		0.214604	1.47996		-0.837647		0.0041648
sp|Q8C5N3-2|CWC22_MOUSE	Cwc22	Isoform 2 of Pre-mRNA-splicing factor CWC22 homolog OS=Mus musculus GN=Cwc22	8	14.36	9.40177		0.715171	0.774855		-0.611055		0.00416627
sp|P70284-2|TGIF1_MOUSE	Tgif1	Isoform 2 of Homeobox protein TGIF1 OS=Mus musculus GN=Tgif1	1	15.2204	7.84105		0.289074	1.53894		-0.956885		0.00416654
sp|Q5NCI0-2|URGCP_MOUSE	Urgcp	Isoform 2 of Up-regulator of cell proliferation OS=Mus musculus GN=Urgcp	3	8.97388	14.9403		0.509236	1.16075		0.735405		0.00416753
sp|Q673H1|TUSC1_MOUSE	Tusc1	Tumor suppressor candidate gene 1 protein homolog OS=Mus musculus GN=Tusc1 PE=2 SV=1	1	22.4966	2.2654		4.30032	0.30017		-3.31187		0.00416875
sp|Q9CXG3|PPIL4_MOUSE	Ppil4	Peptidyl-prolyl cis-trans isomerase-like 4 OS=Mus musculus GN=Ppil4 PE=2 SV=2	6	14.8485	9.15027		0.486395	1.11073		-0.698435		0.00416884
sp|Q8BYL4|SYYM_MOUSE	Yars2	Tyrosyl-tRNA synthetase, mitochondrial OS=Mus musculus GN=Yars2 PE=2 SV=2	11	14.4244	8.04933		1.23255	0.573136		-0.841571		0.00416894
sp|Q8BG15-2|CTSL2_MOUSE	Ctdspl2	Isoform 2 of CTD small phosphatase-like protein 2 OS=Mus musculus GN=Ctdspl2	7	15.754	8.6958		0.350183	1.4561		-0.857328		0.00416904
tr|E9PVA8|E9PVA8_MOUSE	Gcn1l1	Uncharacterized protein OS=Mus musculus GN=Gcn1l1 PE=4 SV=1	130	13.1844	11.3134		0.188665	0.349798		-0.220796		0.0041692
tr|Q3V113|Q3V113_MOUSE	Pygo2	Uncharacterized protein OS=Mus musculus GN=Pygo2 PE=2 SV=1	1	16.5367	6.88066		1.87316	0.852657		-1.26505		0.0041701
tr|Q8K4P0|Q8K4P0_MOUSE	Wdr33	Putative WDC146 OS=Mus musculus GN=Wdr33 PE=2 SV=1	17	13.3087	9.60618		0.0466382	0.787443		-0.470339		0.00417019
sp|Q76KJ5|RPA34_MOUSE	Cd3eap	DNA-directed RNA polymerase I subunit RPA34 OS=Mus musculus GN=Cd3eap PE=1 SV=2	7	14.5188	7.07035		1.51813	0.465704		-1.03807		0.00417038
sp|Q8K4F6|NSUN5_MOUSE	Nsun5	Putative methyltransferase NSUN5 OS=Mus musculus GN=Nsun5 PE=2 SV=2	4	15.2857	6.28605		1.91476	0.0962654		-1.28196		0.00417223
sp|Q9Z2Z9|GFPT2_MOUSE	Gfpt2	Glucosamine--fructose-6-phosphate aminotransferase [isomerizing] 2 OS=Mus musculus GN=Gfpt2 PE=2 SV=3	14	3.32525	22.968		0.786607	4.10878		2.78809		0.00417523
sp|Q3UF25|TM110_MOUSE	Tmem110	Transmembrane protein 110 OS=Mus musculus GN=Tmem110 PE=2 SV=1	1	9.85743	14.2247		0.845565	0.388003		0.529115		0.00417546
sp|Q99N87|RT05_MOUSE	Mrps5	28S ribosomal protein S5, mitochondrial OS=Mus musculus GN=Mrps5 PE=2 SV=1	13	14.4426	8.982		0.526322	1.03954		-0.685222		0.00417748
sp|Q80U70|SUZ12_MOUSE	Suz12	Polycomb protein Suz12 OS=Mus musculus GN=Suz12 PE=1 SV=2	13	16.3925	7.32877		1.89174	0.38351		-1.16139		0.00417786
tr|Q8K205|Q8K205_MOUSE	Pop1	Processing of 1, ribonuclease P/MRP family, (S. cerevisiae) OS=Mus musculus GN=Pop1 PE=2 SV=1	29	14.3968	6.26306		1.13357	1.32163		-1.20081		0.00417991
sp|P48759|PTX3_MOUSE	Ptx3	Pentraxin-related protein PTX3 OS=Mus musculus GN=Ptx3 PE=1 SV=2	13	5.9095	25.5288		0.987521	4.08383		2.11102		0.00418284
tr|E9PZM7|E9PZM7_MOUSE	Scaf11	Uncharacterized protein OS=Mus musculus GN=Scaf11 PE=4 SV=1	17	14.6058	7.29435		1.05439	1.15112		-1.00169		0.00418318
tr|E9QN12|E9QN12_MOUSE	Pdgfrb	Tyrosine-protein kinase receptor OS=Mus musculus GN=Pdgfrb PE=3 SV=1	20	6.96919	17.1376		0.57664	2.09895		1.2981		0.00418326
sp|Q9D1R1|T126B_MOUSE	Tmem126b	Transmembrane protein 126B OS=Mus musculus GN=Tmem126b PE=2 SV=1	1	16.5103	7.96321		1.70698	0.656684		-1.05194		0.00418409
sp|O35188|X3CL1_MOUSE	Cx3cl1	Fractalkine OS=Mus musculus GN=Cx3cl1 PE=2 SV=3	6	20.1832	8.56025		0.984126	2.28494		-1.23743		0.00418531
sp|Q9EQS9-2|IGDC4_MOUSE	Igdcc4	Isoform 2 of Immunoglobulin superfamily DCC subclass member 4 OS=Mus musculus GN=Igdcc4	2	2.55932	29.1656		0.257713	5.69421		3.51044		0.00418554
sp|A2RSY1-2|K1310_MOUSE	Kiaa1310	Isoform 2 of Uncharacterized protein KIAA1310 OS=Mus musculus GN=Kiaa1310	2	15.4139	9.49666		0.467154	1.17888		-0.698743		0.00418669
sp|P60330|ESPL1_MOUSE	Espl1	Separin OS=Mus musculus GN=Espl1 PE=1 SV=1	12	16.4039	6.73738		1.84046	0.936928		-1.28378		0.00418678
tr|E9PZD2|E9PZD2_MOUSE	Micall2	Uncharacterized protein OS=Mus musculus GN=Micall2 PE=4 SV=1	20	15.2162	8.65572		0.703501	1.21477		-0.81388		0.0041869
sp|Q80ZJ1|RAP2A_MOUSE	Rap2a	Ras-related protein Rap-2a OS=Mus musculus GN=Rap2a PE=1 SV=2	1	5.18386	21.081		0.84783	3.28812		2.02384		0.00418706
sp|Q923S9|RAB30_MOUSE	Rab30	Ras-related protein Rab-30 OS=Mus musculus GN=Rab30 PE=2 SV=1	2	10.6499	13.5612		0.261576	0.564475		0.348646		0.00418709
sp|Q8R2U4|NTM1A_MOUSE	Mettl11a	Alpha N-terminal protein methyltransferase 1A OS=Mus musculus GN=Mettl11a PE=2 SV=3	4	15.8934	8.00568		1.32028	1.0494		-0.989332		0.00418905
sp|O88569|ROA2_MOUSE	Hnrnpa2b1	Heterogeneous nuclear ribonucleoproteins A2/B1 OS=Mus musculus GN=Hnrnpa2b1 PE=1 SV=2	2	15.9884	9.6897		0.335458	1.30528		-0.722499		0.00418963
sp|Q9D8S3|ARFG3_MOUSE	Arfgap3	ADP-ribosylation factor GTPase-activating protein 3 OS=Mus musculus GN=Arfgap3 PE=2 SV=2	20	9.00515	17.7711		0.551354	1.79115		0.980714		0.00419058
sp|Q8K012-2|FBP1L_MOUSE	Fnbp1l	Isoform 2 of Formin-binding protein 1-like OS=Mus musculus GN=Fnbp1l	12	19.5109	7.2384		2.33939	1.19229		-1.43054		0.00419201
sp|Q8BKX6|SMG1_MOUSE	Smg1	Serine/threonine-protein kinase SMG1 OS=Mus musculus GN=Smg1 PE=1 SV=3	23	14.1433	10.5488		0.450294	0.623308		-0.423032		0.00419374
sp|Q8R3E3-2|WIPI1_MOUSE	Wipi1	Isoform 2 of WD repeat domain phosphoinositide-interacting protein 1 OS=Mus musculus GN=Wipi1	2	8.75505	18.8753		0.112147	2.16814		1.10831		0.00420001
sp|Q9CWX4|RUSD4_MOUSE	Rpusd4	RNA pseudouridylate synthase domain-containing protein 4 OS=Mus musculus GN=Rpusd4 PE=2 SV=1	4	17.5099	7.74127		1.08945	1.7914		-1.17753		0.00420465
sp|Q9WTL7|LYPA2_MOUSE	Lypla2	Acyl-protein thioesterase 2 OS=Mus musculus GN=Lypla2 PE=1 SV=1	6	19.5429	6.33265		2.45065	1.42739		-1.62577		0.00420504
sp|Q99J36|THUM1_MOUSE	Thumpd1	THUMP domain-containing protein 1 OS=Mus musculus GN=Thumpd1 PE=1 SV=1	12	14.5692	9.94585		0.359534	0.926147		-0.550758		0.00421293
sp|O70230-2|ZN143_MOUSE	Znf143	Isoform 2 of Zinc finger protein 143 OS=Mus musculus GN=Znf143	3	16.4904	8.32144		1.01743	1.4301		-0.986721		0.00421389
sp|Q91W50|CSDE1_MOUSE	Csde1	Cold shock domain-containing protein E1 OS=Mus musculus GN=Csde1 PE=2 SV=1	52	13.4558	8.94587		0.0485022	0.96819		-0.588939		0.00421427
sp|Q9D483|RPC3_MOUSE	Polr3c	DNA-directed RNA polymerase III subunit RPC3 OS=Mus musculus GN=Polr3c PE=2 SV=1	2	15.748	7.10449		1.68842	0.781243		-1.14836		0.00423254
sp|Q91YD6|VILL_MOUSE	Vill	Villin-like protein OS=Mus musculus GN=Vill PE=2 SV=1	14	3.70623	27.2193		0.551378	5.03269		2.87661		0.0042351
sp|Q9QX11-2|CYH1_MOUSE	Cyth1	Isoform 2 of Cytohesin-1 OS=Mus musculus GN=Cyth1	1	19.1865	6.64424		2.63858	0.597279		-1.52992		0.00423571
sp|Q921N6|DDX27_MOUSE	Ddx27	Probable ATP-dependent RNA helicase DDX27 OS=Mus musculus GN=Ddx27 PE=1 SV=3	28	15.18	6.17039		1.56039	1.15697		-1.29874		0.00423575
tr|Q921K2|Q921K2_MOUSE	Parp1	Poly (ADP-ribose) polymerase family, member 1 OS=Mus musculus GN=Parp1 PE=2 SV=1	54	17.1314	8.05904		0.225225	1.94356		-1.08797		0.00423645
sp|Q7TSC1|PRC2A_MOUSE	Prrc2a	Protein PRRC2A OS=Mus musculus GN=Prrc2a PE=1 SV=1	51	14.7019	8.93185		0.691824	1.03371		-0.718971		0.00423662
sp|Q9ES28-2|ARHG7_MOUSE	Arhgef7	Isoform A of Rho guanine nucleotide exchange factor 7 OS=Mus musculus GN=Arhgef7	14	11.9026	14.7509		0.567088	0.235158		0.309529		0.0042373
sp|B2RQE8|RHG42_MOUSE	Arhgap42	Rho GTPase-activating protein 42 OS=Mus musculus GN=Arhgap42 PE=2 SV=1	2	16.8272	5.98282		1.63051	1.67421		-1.4919		0.0042384
sp|Q80YQ2-2|MED23_MOUSE	Med23	Isoform 2 of Mediator of RNA polymerase II transcription subunit 23 OS=Mus musculus GN=Med23	8	15.8529	8.06344		1.39637	0.93046		-0.975279		0.00423896
sp|Q8BH86|CN159_MOUSE		UPF0317 protein C14orf159 homolog, mitochondrial OS=Mus musculus PE=2 SV=1	14	2.80546	29.3441		0.15009	5.71696		3.38676		0.00424127
sp|Q9WTK2-2|CDYL_MOUSE	Cdyl	Isoform 2 of Chromodomain Y-like protein OS=Mus musculus GN=Cdyl	5	15.5048	7.62771		0.535244	1.61431		-1.02339		0.00424809
sp|Q9CYR6|AGM1_MOUSE	Pgm3	Phosphoacetylglucosamine mutase OS=Mus musculus GN=Pgm3 PE=1 SV=1	13	9.11848	19.3785		0.665966	2.11418		1.08759		0.00425104
sp|Q9D0R4|DDX56_MOUSE	Ddx56	Probable ATP-dependent RNA helicase DDX56 OS=Mus musculus GN=Ddx56 PE=2 SV=1	12	14.0052	6.05932		1.13176	1.29065		-1.20873		0.00425402
sp|Q61490|CD166_MOUSE	Alcam	CD166 antigen OS=Mus musculus GN=Alcam PE=1 SV=3	15	4.99439	25.8814		0.555154	4.48797		2.37354		0.00425828
sp|Q9JJY3|NSMA2_MOUSE	Smpd3	Sphingomyelin phosphodiesterase 3 OS=Mus musculus GN=Smpd3 PE=1 SV=1	1	6.96801	24.4912		1.16125	3.60901		1.81345		0.00426071
sp|Q8BL06-2|UBP54_MOUSE	Usp54	Isoform 2 of Inactive ubiquitin carboxyl-terminal hydrolase 54 OS=Mus musculus GN=Usp54	1	13.9551	8.66175		1.03087	0.500657		-0.688062		0.00426135
sp|B2RWS6|EP300_MOUSE	Ep300	Histone acetyltransferase p300 OS=Mus musculus GN=Ep300 PE=1 SV=1	15	15.5143	7.54934		1.50355	0.841493		-1.03917		0.00426194
sp|Q99M28-2|RNPS1_MOUSE	Rnps1	Isoform 2 of RNA-binding protein with serine-rich domain 1 OS=Mus musculus GN=Rnps1	12	15.6599	8.28506		1.27734	0.957936		-0.918493		0.00426441
sp|Q6NXI6-2|RPRD2_MOUSE	Rprd2	Isoform 2 of Regulation of nuclear pre-mRNA domain-containing protein 2 OS=Mus musculus GN=Rprd2	9	16.3902	8.36365		1.3873	1.04414		-0.970625		0.0042653
sp|P97366|EVI5_MOUSE	Evi5	Ecotropic viral integration site 5 protein OS=Mus musculus GN=Evi5 PE=1 SV=2	8	11.5433	14.0651		0.253868	0.482717		0.285061		0.00426537
sp|Q80ZS3|RT26_MOUSE	Mrps26	28S ribosomal protein S26, mitochondrial OS=Mus musculus GN=Mrps26 PE=2 SV=1	8	14.0256	8.46904		0.324315	1.1583		-0.727788		0.00426619
sp|Q9QXZ0-2|MACF1_MOUSE	Macf1	Isoform 2 of Microtubule-actin cross-linking factor 1 OS=Mus musculus GN=Macf1	147	15.544	12.0616		0.746624	0.10894		-0.365933		0.0042672
tr|E9PX57|E9PX57_MOUSE	Kif6	Uncharacterized protein OS=Mus musculus GN=Kif6 PE=3 SV=1	1	16.124	8.10321		1.38476	1.05143		-0.992645		0.00427142
sp|Q7TSG2|CTDP1_MOUSE	Ctdp1	RNA polymerase II subunit A C-terminal domain phosphatase OS=Mus musculus GN=Ctdp1 PE=1 SV=1	25	11.7743	8.80146		0.562071	0.316423		-0.419831		0.00428251
sp|Q99J23|GHDC_MOUSE	Ghdc	GH3 domain-containing protein OS=Mus musculus GN=Ghdc PE=2 SV=2	4	9.72382	13.6031		0.755741	0.37102		0.484341		0.0042834
sp|Q8BJF9|CHM2B_MOUSE	Chmp2b	Charged multivesicular body protein 2b OS=Mus musculus GN=Chmp2b PE=2 SV=1	17	10.7617	18.6661		1.1085	1.31375		0.79451		0.00431303
sp|Q6ZWM4|NAA38_MOUSE	Naa38	N-alpha-acetyltransferase 38, NatC auxiliary subunit OS=Mus musculus GN=Naa38 PE=2 SV=3	10	17.3589	7.5406		2.06962	0.530268		-1.20292		0.00431987
sp|Q8VCG9|RFXAP_MOUSE	Rfxap	Regulatory factor X-associated protein OS=Mus musculus GN=Rfxap PE=2 SV=2	1	18.2413	7.07465		1.49311	1.92234		-1.36648		0.00432749
tr|D3Z7I0|D3Z7I0_MOUSE	Gtf3c2	Uncharacterized protein OS=Mus musculus GN=Gtf3c2 PE=4 SV=1	9	15.9198	7.96649		1.48702	0.887864		-0.998809		0.00432828
sp|Q91X43|SH319_MOUSE	Sh3d19	SH3 domain-containing protein 19 OS=Mus musculus GN=Sh3d19 PE=1 SV=2	15	10.165	16.1488		1.30467	0.00911647		0.667821		0.00432854
sp|Q9CQQ8|LSM7_MOUSE	Lsm7	U6 snRNA-associated Sm-like protein LSm7 OS=Mus musculus GN=Lsm7 PE=2 SV=1	3	15.063	9.19339		0.47835	1.18662		-0.712344		0.00433037
sp|Q9R0A0|PEX14_MOUSE	Pex14	Peroxisomal membrane protein PEX14 OS=Mus musculus GN=Pex14 PE=1 SV=1	10	14.6201	8.64706		1.27403	0.264204		-0.757675		0.00433041
sp|Q9Z1M8|RED_MOUSE	Ik	Protein Red OS=Mus musculus GN=Ik PE=2 SV=2	11	15.4884	9.18377		0.78524	1.1276		-0.754029		0.00433202
sp|Q8VEH8|ERLEC_MOUSE	Erlec1	Endoplasmic reticulum lectin 1 OS=Mus musculus GN=Erlec1 PE=2 SV=1	12	7.31833	19.1685		1.07779	2.34695		1.38915		0.00433477
sp|Q80U49|K0284_MOUSE	Kiaa0284	Protein KIAA0284 OS=Mus musculus GN=Kiaa0284 PE=1 SV=2	11	8.40592	20.2349		0.172982	2.575		1.26737		0.0043355
sp|Q9JJY4|DDX20_MOUSE	Ddx20	Probable ATP-dependent RNA helicase DDX20 OS=Mus musculus GN=Ddx20 PE=1 SV=2	11	15.0484	7.49182		1.2595	1.06567		-1.00622		0.00434387
sp|P33174|KIF4_MOUSE	Kif4	Chromosome-associated kinesin KIF4 OS=Mus musculus GN=Kif4 PE=2 SV=3	28	20.7575	5.50012		2.79339	1.81973		-1.9161		0.00434655
sp|O88351|IKKB_MOUSE	Ikbkb	Inhibitor of nuclear factor kappa-B kinase subunit beta OS=Mus musculus GN=Ikbkb PE=1 SV=1	14	10.3923	17.2838		0.321689	1.4715		0.733907		0.00434768
tr|E9Q805|E9Q805_MOUSE	Farp1	Uncharacterized protein OS=Mus musculus GN=Farp1 PE=4 SV=1	10	9.05938	18.3417		0.95642	1.78787		1.01765		0.00434831
sp|Q8R3L8-3|CDK8_MOUSE	Cdk8	Isoform 3 of Cyclin-dependent kinase 8 OS=Mus musculus GN=Cdk8	5	13.3391	8.40479		0.457144	0.976368		-0.666375		0.00434876
sp|Q7TSQ8|PDPR_MOUSE	Pdpr	Pyruvate dehydrogenase phosphatase regulatory subunit, mitochondrial OS=Mus musculus GN=Pdpr PE=2 SV=1	12	7.62822	23.7855		0.670293	3.47017		1.64066		0.00435766
sp|O35144|TERF2_MOUSE	Terf2	Telomeric repeat-binding factor 2 OS=Mus musculus GN=Terf2 PE=1 SV=3	5	16.3242	10.4798		0.824619	0.97881		-0.639395		0.00436951
sp|Q05909|PTPRG_MOUSE	Ptprg	Receptor-type tyrosine-protein phosphatase gamma OS=Mus musculus GN=Ptprg PE=1 SV=1	7	6.00478	16.6789		0.462953	2.291		1.47384		0.00437118
sp|Q8VCE4|CI040_MOUSE		Uncharacterized protein C9orf40 homolog OS=Mus musculus PE=2 SV=1	1	21.7148	5.59854		3.2869	1.29797		-1.95556		0.00437711
sp|Q8R1V4|TMED4_MOUSE	Tmed4	Transmembrane emp24 domain-containing protein 4 OS=Mus musculus GN=Tmed4 PE=2 SV=1	14	7.42506	18.9452		0.893746	2.36176		1.35136		0.00437829
sp|Q9Z2D8|MBD3_MOUSE	Mbd3	Methyl-CpG-binding domain protein 3 OS=Mus musculus GN=Mbd3 PE=1 SV=1	11	17.2031	7.17906		1.82457	1.22545		-1.26081		0.00437958
sp|Q8R409|HEXI1_MOUSE	Hexim1	Protein HEXIM1 OS=Mus musculus GN=Hexim1 PE=1 SV=1	5	14.9578	8.83969		0.622213	1.18786		-0.758828		0.00438023
tr|E9PYB0|E9PYB0_MOUSE	Ahnak2	Uncharacterized protein OS=Mus musculus GN=Ahnak2 PE=4 SV=1	56	4.3423	21.9743		0.108302	3.86715		2.33929		0.00438399
sp|Q61457|CCNE1_MOUSE	Ccne1	G1/S-specific cyclin-E1 OS=Mus musculus GN=Ccne1 PE=1 SV=2	2	9.11876	14.9541		0.23193	1.25971		0.713632		0.00438758
sp|P63038|CH60_MOUSE	Hspd1	60 kDa heat shock protein, mitochondrial OS=Mus musculus GN=Hspd1 PE=1 SV=1	158	14.4686	9.57847		0.88182	0.61294		-0.595059		0.00439205
sp|O88796|RPP30_MOUSE	Rpp30	Ribonuclease P protein subunit p30 OS=Mus musculus GN=Rpp30 PE=2 SV=1	8	14.2947	8.23265		1.2263	0.519902		-0.796052		0.00439358
sp|Q8R4U7|LUZP1_MOUSE	Luzp1	Leucine zipper protein 1 OS=Mus musculus GN=Luzp1 PE=1 SV=2	30	15.0105	11.9461		0.35504	0.572285		-0.329436		0.00439389
sp|Q8CEE0-2|CEP57_MOUSE	Cep57	Isoform 2 of Centrosomal protein of 57 kDa OS=Mus musculus GN=Cep57	3	16.5088	8.41208		1.48574	0.977979		-0.972698		0.00439438
sp|Q8R2U7|LRC42_MOUSE	Lrrc42	Leucine-rich repeat-containing protein 42 OS=Mus musculus GN=Lrrc42 PE=2 SV=1	2	15.7997	8.97964		1.48355	0.234555		-0.815171		0.00440107
sp|P32883-2|RASK_MOUSE	Kras	Isoform 2B of GTPase KRas OS=Mus musculus GN=Kras	7	10.1391	14.964		0.291776	1.02104		0.561559		0.00440109
sp|Q569Z5|DDX46_MOUSE	Ddx46	Probable ATP-dependent RNA helicase DDX46 OS=Mus musculus GN=Ddx46 PE=1 SV=2	45	15.9273	9.53535		0.58784	1.27783		-0.740141		0.00440155
sp|Q61712|DNJC1_MOUSE	Dnajc1	DnaJ homolog subfamily C member 1 OS=Mus musculus GN=Dnajc1 PE=1 SV=1	18	9.75825	15.4459		1.18769	0.39444		0.662526		0.00440369
sp|P42867|GPT_MOUSE	Dpagt1	UDP-N-acetylglucosamine--dolichyl-phosphate N-acetylglucosaminephosphotransferase OS=Mus musculus GN=Dpagt1 PE=2 SV=2	2	9.8991	15.0247		0.64899	0.92356		0.60197		0.00440411
sp|Q60767|LY75_MOUSE	Ly75	Lymphocyte antigen 75 OS=Mus musculus GN=Ly75 PE=1 SV=2	24	19.3608	3.2288		3.32652	1.24516		-2.58407		0.00440415
sp|P97440|SLBP_MOUSE	Slbp	Histone RNA hairpin-binding protein OS=Mus musculus GN=Slbp PE=1 SV=1	2	17.6401	8.13936		1.95711	0.734376		-1.11587		0.00440599
sp|P61161|ARP2_MOUSE	Actr2	Actin-related protein 2 OS=Mus musculus GN=Actr2 PE=1 SV=1	31	10.9335	14.5919		0.765824	0.251699		0.416405		0.00440708
sp|Q3TZZ7|ESYT2_MOUSE	Esyt2	Extended synaptotagmin-2 OS=Mus musculus GN=Esyt2 PE=1 SV=1	22	8.44832	13.2556		0.864991	0.608516		0.649863		0.00440785
sp|Q99LC8|EI2BA_MOUSE	Eif2b1	Translation initiation factor eIF-2B subunit alpha OS=Mus musculus GN=Eif2b1 PE=2 SV=1	6	14.7808	8.24718		0.614424	1.30329		-0.841754		0.00441354
sp|P62309|RUXG_MOUSE	Snrpg	Small nuclear ribonucleoprotein G OS=Mus musculus GN=Snrpg PE=1 SV=1	8	15.9312	7.53241		1.52968	1.04418		-1.08068		0.0044161
sp|O70133|DHX9_MOUSE	Dhx9	ATP-dependent RNA helicase A OS=Mus musculus GN=Dhx9 PE=1 SV=2	65	15.7716	9.57705		0.841374	1.07798		-0.719679		0.00442351
sp|Q924W5|SMC6_MOUSE	Smc6	Structural maintenance of chromosomes protein 6 OS=Mus musculus GN=Smc6 PE=2 SV=1	6	12.6593	9.01671		0.56582	0.571196		-0.489525		0.00442479
sp|P52800|EFNB2_MOUSE	Efnb2	Ephrin-B2 OS=Mus musculus GN=Efnb2 PE=1 SV=1	2	7.56323	21.9187		1.07861	2.9821		1.53509		0.00442823
sp|Q8K2M0|RM38_MOUSE	Mrpl38	39S ribosomal protein L38, mitochondrial OS=Mus musculus GN=Mrpl38 PE=2 SV=2	6	14.5636	9.01594		0.934957	0.791914		-0.69182		0.00442838
sp|Q9QZH6|ECSIT_MOUSE	Ecsit	Evolutionarily conserved signaling intermediate in Toll pathway, mitochondrial OS=Mus musculus GN=Ecsit PE=1 SV=2	6	15.2379	8.17299		1.48258	0.489634		-0.898726		0.00443219
tr|Q0VBL3|Q0VBL3_MOUSE	Rbm15	RNA binding motif protein 15 OS=Mus musculus GN=Rbm15 PE=2 SV=1	19	16.0332	8.02451		1.48935	0.95929		-0.998574		0.00443398
sp|Q9R0X0|MED20_MOUSE	Med20	Mediator of RNA polymerase II transcription subunit 20 OS=Mus musculus GN=Med20 PE=1 SV=1	4	15.4409	8.00608		1.42542	0.820073		-0.947586		0.00443615
sp|Q9D2X5-2|SCC4_MOUSE	Mau2	Isoform 2 of MAU2 chromatid cohesion factor homolog OS=Mus musculus GN=Mau2	5	18.0902	6.27297		2.37585	1.08758		-1.52799		0.00443738
sp|Q3TIU4|PDE12_MOUSE	Pde12	2',5'-phosphodiesterase 12 OS=Mus musculus GN=Pde12 PE=2 SV=2	15	9.80935	13.7771		0.539157	0.693934		0.490043		0.00443755
sp|O35491|CLK2_MOUSE	Clk2	Dual specificity protein kinase CLK2 OS=Mus musculus GN=Clk2 PE=2 SV=2	3	14.8714	8.63175		1.19116	0.696817		-0.784819		0.00443786
sp|P45376|ALDR_MOUSE	Akr1b1	Aldose reductase OS=Mus musculus GN=Akr1b1 PE=1 SV=3	24	18.3366	9.0695		1.7797	1.02212		-1.01563		0.00444
sp|Q8CBY8-2|DCTN4_MOUSE	Dctn4	Isoform 2 of Dynactin subunit 4 OS=Mus musculus GN=Dctn4	13	11.3263	14.5632		0.337932	0.632553		0.36265		0.00444025
sp|Q8BHG9|CGBP1_MOUSE	Cggbp1	CGG triplet repeat-binding protein 1 OS=Mus musculus GN=Cggbp1 PE=2 SV=1	9	16.9385	7.96975		1.77673	0.885673		-1.0877		0.00444161
sp|P97813|PLD2_MOUSE	Pld2	Phospholipase D2 OS=Mus musculus GN=Pld2 PE=1 SV=2	4	8.334	15.2933		0.625807	1.41039		0.875819		0.00444206
sp|O35685|NUDC_MOUSE	Nudc	Nuclear migration protein nudC OS=Mus musculus GN=Nudc PE=1 SV=1	32	17.0731	7.18212		1.86779	1.14438		-1.24925		0.00444329
sp|Q6P5G6|UBXN7_MOUSE	Ubxn7	UBX domain-containing protein 7 OS=Mus musculus GN=Ubxn7 PE=1 SV=2	7	17.487	7.89936		0.904757	1.92335		-1.14647		0.00444381
sp|Q6PIU9|YJ005_MOUSE		Uncharacterized protein FLJ45252 homolog OS=Mus musculus PE=1 SV=2	9	10.9351	15.353		0.494068	0.844362		0.489557		0.00444468
sp|Q5RJ54|ZN187_MOUSE	Znf187	Zinc finger protein 187 OS=Mus musculus GN=Znf187 PE=2 SV=1	2	16.1636	9.36637		0.634008	1.36818		-0.78719		0.00444492
sp|Q8BIG4|FBX28_MOUSE	Fbxo28	F-box only protein 28 OS=Mus musculus GN=Fbxo28 PE=2 SV=1	2	16.0735	7.72844		1.81196	0.378719		-1.05643		0.00444663
sp|Q9DAA6|EXOS1_MOUSE	Exosc1	Exosome complex component CSL4 OS=Mus musculus GN=Exosc1 PE=2 SV=1	7	14.7107	8.99528		0.289595	1.23351		-0.709626		0.00444677
sp|Q8CGC4|LS14B_MOUSE	Lsm14b	Protein LSM14 homolog B OS=Mus musculus GN=Lsm14b PE=2 SV=3	4	15.6919	7.85845		1.25602	1.2048		-0.997707		0.00446696
sp|Q8R010|AIMP2_MOUSE	Aimp2	Aminoacyl tRNA synthase complex-interacting multifunctional protein 2 OS=Mus musculus GN=Aimp2 PE=1 SV=2	10	14.7258	8.83176		0.804518	1.03639		-0.737569		0.00447501
sp|P35601-2|RFC1_MOUSE	Rfc1	Isoform 2 of Replication factor C subunit 1 OS=Mus musculus GN=Rfc1	24	16.0963	7.55263		0.31431	1.87538		-1.09168		0.00447593
sp|P61924|COPZ1_MOUSE	Copz1	Coatomer subunit zeta-1 OS=Mus musculus GN=Copz1 PE=2 SV=1	5	16.1719	8.87825		0.380742	1.5792		-0.865142		0.0044775
sp|Q6ZQK5-2|ACAP2_MOUSE	Acap2	Isoform 2 of Arf-GAP with coiled-coil, ANK repeat and PH domain-containing protein 2 OS=Mus musculus GN=Acap2	10	8.9414	16.7126		0.83416	1.51417		0.902364		0.0044777
sp|Q8R0G9|NU133_MOUSE	Nup133	Nuclear pore complex protein Nup133 OS=Mus musculus GN=Nup133 PE=1 SV=2	36	13.7574	10.2021		0.571203	0.546801		-0.431341		0.0044778
sp|Q3UFS4|CCD75_MOUSE	Ccdc75	Coiled-coil domain-containing protein 75 OS=Mus musculus GN=Ccdc75 PE=2 SV=2	3	17.0961	7.28889		1.99933	0.875442		-1.2299		0.00447803
sp|Q9CRY7|GDPD1_MOUSE	Gdpd1	Glycerophosphodiester phosphodiesterase domain-containing protein 1 OS=Mus musculus GN=Gdpd1 PE=2 SV=1	2	17.6286	6.74606		2.41578	0.141781		-1.3858		0.00447808
sp|Q9CZJ1|UTP11_MOUSE	Utp11l	Probable U3 small nucleolar RNA-associated protein 11 OS=Mus musculus GN=Utp11l PE=2 SV=1	8	15.361	6.90145		1.07405	1.54767		-1.1543		0.00447836
sp|Q8VE37|RCC1_MOUSE	Rcc1	Regulator of chromosome condensation OS=Mus musculus GN=Rcc1 PE=1 SV=1	22	17.4119	6.3962		1.54244	1.90497		-1.44478		0.00447872
sp|Q3V1V3|ESF1_MOUSE	Esf1	ESF1 homolog OS=Mus musculus GN=Esf1 PE=1 SV=1	22	14.7267	7.48199		1.37204	0.850191		-0.976937		0.00447996
sp|Q5SSI6|UTP18_MOUSE	Utp18	U3 small nucleolar RNA-associated protein 18 homolog OS=Mus musculus GN=Utp18 PE=1 SV=1	14	15.5213	7.13458		1.46446	1.16116		-1.12135		0.00448002
sp|A2RTL5|RSRC2_MOUSE	Rsrc2	Arginine/serine-rich coiled-coil protein 2 OS=Mus musculus GN=Rsrc2 PE=2 SV=1	4	15.9173	8.40054		0.942371	1.39066		-0.922045		0.00451182
sp|Q8BGA7|CG026_MOUSE		Uncharacterized protein C7orf26 homolog OS=Mus musculus PE=2 SV=1	1	16.283	7.56282		1.11833	1.59431		-1.10637		0.0045134
sp|Q8K3Z9|PO121_MOUSE	Pom121	Nuclear envelope pore membrane protein POM 121 OS=Mus musculus GN=Pom121 PE=1 SV=2	15	16.0726	9.02264		1.00921	1.20981		-0.832982		0.00451444
sp|Q9JKP7|DPOE3_MOUSE	Pole3	DNA polymerase epsilon subunit 3 OS=Mus musculus GN=Pole3 PE=2 SV=1	2	16.8533	7.06234		1.44487	1.64485		-1.25482		0.00451444
sp|Q8VC30|DHAK_MOUSE	Dak	Bifunctional ATP-dependent dihydroxyacetone kinase/FAD-AMP lyase (cyclizing) OS=Mus musculus GN=Dak PE=2 SV=1	15	8.97479	18.637		0.223077	2.14761		1.05422		0.0045173
sp|Q8BZ47|ZN609_MOUSE	Znf609	Zinc finger protein 609 OS=Mus musculus GN=Znf609 PE=1 SV=2	6	16.3096	7.12544		1.78462	1.01614		-1.19467		0.00451775
sp|Q9CZX9|TMM85_MOUSE	Tmem85	Transmembrane protein 85 OS=Mus musculus GN=Tmem85 PE=2 SV=1	4	15.3199	9.22888		0.627326	1.20781		-0.731183		0.00451908
sp|Q6P9P6|KIF11_MOUSE	Kif11	Kinesin-like protein KIF11 OS=Mus musculus GN=Kif11 PE=2 SV=1	32	21.1298	6.67464		3.09289	0.947348		-1.66251		0.004524
sp|Q91VA3|CAN8_MOUSE	Capn8	Calpain-8 OS=Mus musculus GN=Capn8 PE=1 SV=1	1	8.48075	18.5016		1.32412	1.81185		1.12539		0.00453
tr|D3YZZ5|D3YZZ5_MOUSE	Tmed7	Uncharacterized protein OS=Mus musculus GN=Tmed7 PE=3 SV=1	7	6.27917	20.0922		0.863184	2.97113		1.67799		0.00453005
tr|F6YAM1|F6YAM1_MOUSE	Zfp930	Uncharacterized protein (Fragment) OS=Mus musculus GN=Zfp930 PE=4 SV=1	1	17.2839	5.77234		1.95815	1.6761		-1.5822		0.00453062
sp|Q8CG19-2|LTBP1_MOUSE	Ltbp1	Isoform Short of Latent-transforming growth factor beta-binding protein 1 OS=Mus musculus GN=Ltbp1	26	14.4044	5.41849		1.87483	0.736919		-1.41054		0.00454121
sp|Q9CZV5|ST65G_MOUSE	Supt7l	STAGA complex 65 subunit gamma OS=Mus musculus GN=Supt7l PE=2 SV=1	3	16.1566	8.93308		1.42705	0.768485		-0.854894		0.00455314
sp|Q923B1|DBR1_MOUSE	Dbr1	Lariat debranching enzyme OS=Mus musculus GN=Dbr1 PE=1 SV=2	8	15.3234	8.94274		1.06545	0.957857		-0.776947		0.00456203
sp|Q8R2R1|POMT1_MOUSE	Pomt1	Protein O-mannosyl-transferase 1 OS=Mus musculus GN=Pomt1 PE=2 SV=1	3	9.29587	14.1536		0.793135	0.749268		0.606508		0.0045638
sp|Q5M8N0|CNRP1_MOUSE	Cnrip1	CB1 cannabinoid receptor-interacting protein 1 OS=Mus musculus GN=Cnrip1 PE=1 SV=1	1	7.43873	1.26788		1.0338	0.923647		-2.55264		0.00456399
sp|O35841|API5_MOUSE	Api5	Apoptosis inhibitor 5 OS=Mus musculus GN=Api5 PE=2 SV=2	28	15.8053	9.06429		1.44847	0.44453		-0.802143		0.00456903
sp|Q9CZU3|SK2L2_MOUSE	Skiv2l2	Superkiller viralicidic activity 2-like 2 OS=Mus musculus GN=Skiv2l2 PE=2 SV=1	35	14.8461	8.64141		0.78791	1.1542		-0.780743		0.0046017
sp|P56183-2|RRP1_MOUSE	Rrp1	Isoform 2 of Ribosomal RNA processing protein 1 homolog A OS=Mus musculus GN=Rrp1	13	14.7823	8.32036		0.755278	1.24538		-0.829152		0.00460759
sp|Q9CYH2|CJ058_MOUSE		UPF0765 protein C10orf58 homolog OS=Mus musculus PE=1 SV=2	2	20.0285	4.77425		3.36342	0.712004		-2.06871		0.00460936
sp|Q9CR88|RT14_MOUSE	Mrps14	28S ribosomal protein S14, mitochondrial OS=Mus musculus GN=Mrps14 PE=2 SV=1	2	17.1093	3.60858		2.99873	0.524379		-2.24528		0.00461095
sp|Q64516-1|GLPK_MOUSE	Gk	Isoform 1 of Glycerol kinase OS=Mus musculus GN=Gk	7	16.5984	10.0279		1.23531	0.818687		-0.727025		0.0046124
sp|O54784|DAPK3_MOUSE	Dapk3	Death-associated protein kinase 3 OS=Mus musculus GN=Dapk3 PE=1 SV=1	7	19.5914	6.20574		2.98255	0.485498		-1.65854		0.00461759
sp|Q80W00-2|PP1RA_MOUSE	Ppp1r10	Isoform 2 of Serine/threonine-protein phosphatase 1 regulatory subunit 10 OS=Mus musculus GN=Ppp1r10	14	15.1857	8.27828		0.786507	1.347		-0.875307		0.00461938
tr|E9QLA5|E9QLA5_MOUSE	Inf2	Uncharacterized protein OS=Mus musculus GN=Inf2 PE=4 SV=1	24	7.49988	16.8571		0.602617	2.02457		1.16842		0.00462069
sp|Q9QYL7|ABT1_MOUSE	Abt1	Activator of basal transcription 1 OS=Mus musculus GN=Abt1 PE=2 SV=1	5	16.8106	6.75503		1.90445	1.23464		-1.31534		0.00462135
tr|Q8R2T7|Q8R2T7_MOUSE	Osbpl10	Oxysterol-binding protein OS=Mus musculus GN=Osbpl10 PE=2 SV=1	2	5.94486	18.4933		0.662303	2.75688		1.63729		0.00462267
sp|Q8CDM1|ATAD2_MOUSE	Atad2	ATPase family AAA domain-containing protein 2 OS=Mus musculus GN=Atad2 PE=1 SV=1	16	15.5924	7.4028		1.84492	0.138768		-1.0747		0.00462323
sp|Q8K327|ZN828_MOUSE	Znf828	Zinc finger protein 828 OS=Mus musculus GN=Znf828 PE=1 SV=1	10	15.9233	8.50928		0.656473	1.54271		-0.904031		0.00463372
sp|Q9WVM3|APC7_MOUSE	Anapc7	Anaphase-promoting complex subunit 7 OS=Mus musculus GN=Anapc7 PE=1 SV=3	10	13.4193	11.8939		0.228408	0.259098		-0.174088		0.0046533
sp|Q9JM58|CRLF1_MOUSE	Crlf1	Cytokine receptor-like factor 1 OS=Mus musculus GN=Crlf1 PE=1 SV=1	13	8.13283	23.6562		3.06021	1.73355		1.54039		0.00465355
sp|Q6PIX5|RHDF1_MOUSE	Rhbdf1	Inactive rhomboid protein 1 OS=Mus musculus GN=Rhbdf1 PE=1 SV=2	7	5.94169	21.9601		0.462002	3.59906		1.88594		0.00465366
sp|Q80U87|UBP8_MOUSE	Usp8	Ubiquitin carboxyl-terminal hydrolase 8 OS=Mus musculus GN=Usp8 PE=1 SV=2	21	10.6566	15.8278		0.465567	1.07548		0.570712		0.00465447
sp|Q60597|ODO1_MOUSE	Ogdh	2-oxoglutarate dehydrogenase, mitochondrial OS=Mus musculus GN=Ogdh PE=1 SV=3	57	9.16543	14.7986		0.367574	1.22189		0.691187		0.00465597
sp|Q80UK7-2|SAS6_MOUSE	Sass6	Isoform 2 of Spindle assembly abnormal protein 6 homolog OS=Mus musculus GN=Sass6	1	16.2375	6.87945		1.60507	1.39001		-1.23897		0.004665
sp|Q8CJF7|ELYS_MOUSE	Ahctf1	Protein ELYS OS=Mus musculus GN=Ahctf1 PE=1 SV=1	35	15.3612	9.44183		0.793373	1.08308		-0.702153		0.0046654
sp|Q9D735|CS043_MOUSE		Uncharacterized protein C19orf43 homolog OS=Mus musculus PE=2 SV=1	6	16.2519	8.68048		1.09877	1.32027		-0.904759		0.00466611
sp|Q9WUA2|SYFB_MOUSE	Farsb	Phenylalanyl-tRNA synthetase beta chain OS=Mus musculus GN=Farsb PE=2 SV=2	35	10.4828	14.1468		0.531978	0.639137		0.432446		0.00466647
tr|E9QP99|E9QP99_MOUSE	Golga3	Uncharacterized protein OS=Mus musculus GN=Golga3 PE=4 SV=1	58	9.75225	15.6101		0.566364	1.2033		0.67867		0.00466898
sp|Q9JJ48|ZC3H8_MOUSE	Zc3h8	Zinc finger CCCH domain-containing protein 8 OS=Mus musculus GN=Zc3h8 PE=1 SV=2	1	14.994	3.67349		2.50031	0.599934		-2.02916		0.00466986
sp|Q80X90|FLNB_MOUSE	Flnb	Filamin-B OS=Mus musculus GN=Flnb PE=1 SV=3	357	8.4356	18.4089		0.383174	2.23242		1.12584		0.00467171
tr|Q3TAQ9|Q3TAQ9_MOUSE	Wdr36	Uncharacterized protein OS=Mus musculus GN=Wdr36 PE=2 SV=1	24	14.5074	7.75974		1.30172	0.812559		-0.902709		0.00468815
sp|Q8BKS9|K0020_MOUSE	Kiaa0020	Pumilio domain-containing protein KIAA0020 OS=Mus musculus GN=Kiaa0020 PE=2 SV=2	22	14.2748	6.4898		1.16995	1.32944		-1.13722		0.00468991
sp|Q8BJS4-2|SUN2_MOUSE	Sun2	Isoform 2 of SUN domain-containing protein 2 OS=Mus musculus GN=Sun2	42	18.621	8.52528		1.99634	1.13681		-1.12711		0.00469221
sp|P17427|AP2A2_MOUSE	Ap2a2	AP-2 complex subunit alpha-2 OS=Mus musculus GN=Ap2a2 PE=1 SV=2	29	10.5734	15.249		0.134604	1.05644		0.528274		0.00469905
sp|Q91Z67|FNBP2_MOUSE	Srgap2	SLIT-ROBO Rho GTPase-activating protein 2 OS=Mus musculus GN=Srgap2 PE=1 SV=2	13	9.63184	16.9004		0.369916	1.61344		0.811172		0.00469942
sp|Q99K01-2|PDXD1_MOUSE	Pdxdc1	Isoform 2 of Pyridoxal-dependent decarboxylase domain-containing protein 1 OS=Mus musculus GN=Pdxdc1	38	10.7392	14.3839		0.660051	0.503225		0.421569		0.00470235
sp|P63073|IF4E_MOUSE	Eif4e	Eukaryotic translation initiation factor 4E OS=Mus musculus GN=Eif4e PE=1 SV=1	12	14.3886	9.53127		1.06683	0.295093		-0.594185		0.00470387
tr|B2RVK7|B2RVK7_MOUSE	Als2cr4	Amyotrophic lateral sclerosis 2 (Juvenile) chromosome region, candidate 4 OS=Mus musculus GN=Als2cr4 PE=2 SV=1	1	9.93923	17.0375		0.992225	1.27953		0.777511		0.00471801
sp|Q8BJY1|PSMD5_MOUSE	Psmd5	26S proteasome non-ATPase regulatory subunit 5 OS=Mus musculus GN=Psmd5 PE=2 SV=4	17	15.8294	9.08666		1.24981	0.89807		-0.800782		0.00472568
sp|Q9JHC9-2|ELF2_MOUSE	Elf2	Isoform 1 of ETS-related transcription factor Elf-2 OS=Mus musculus GN=Elf2	4	17.5026	7.10457		1.62197	1.73529		-1.30075		0.004737
sp|P35505|FAAA_MOUSE	Fah	Fumarylacetoacetase OS=Mus musculus GN=Fah PE=1 SV=2	10	3.81084	23.6196		0.265162	4.52267		2.6318		0.00473753
sp|Q8C8T8|TSR2_MOUSE	Tsr2	Pre-rRNA-processing protein TSR2 homolog OS=Mus musculus GN=Tsr2 PE=2 SV=1	4	16.5987	9.75429		1.01733	1.18955		-0.766958		0.00473954
sp|Q9CQS5|RIOK2_MOUSE	Riok2	Serine/threonine-protein kinase RIO2 OS=Mus musculus GN=Riok2 PE=1 SV=1	5	17.0251	6.19952		2.35604	0.759835		-1.45744		0.0047417
sp|Q9JHK4|PGTA_MOUSE	Rabggta	Geranylgeranyl transferase type-2 subunit alpha OS=Mus musculus GN=Rabggta PE=1 SV=1	10	9.60756	14.7986		0.825929	0.85241		0.623215		0.00474317
tr|D3Z3H0|D3Z3H0_MOUSE	Ino80e	Uncharacterized protein OS=Mus musculus GN=Ino80e PE=4 SV=1	2	15.2231	8.27588		0.750908	1.39961		-0.879281		0.00474492
sp|Q8C5H8-2|CE033_MOUSE		Isoform 2 of UPF0465 protein C5orf33 homolog OS=Mus musculus	10	19.8686	5.84857		2.99095	1.15183		-1.76434		0.00474683
sp|Q8K214-2|SCMH1_MOUSE	Scmh1	Isoform 2 of Polycomb protein SCMH1 OS=Mus musculus GN=Scmh1	3	17.5298	7.1869		2.32257	0.466601		-1.28637		0.00475341
sp|Q8K078-2|SO4A1_MOUSE	Slco4a1	Isoform 2 of Solute carrier organic anion transporter family member 4A1 OS=Mus musculus GN=Slco4a1	1	30.7409	0.412101		6.94585	0.225875		-6.22102		0.00475403
sp|Q3TWF6|WDR70_MOUSE	Wdr70	WD repeat-containing protein 70 OS=Mus musculus GN=Wdr70 PE=1 SV=1	14	16.0076	7.75782		1.6631	0.898146		-1.04503		0.00475542
tr|B0QZL1|B0QZL1_MOUSE	Eno1	Enolase (Fragment) OS=Mus musculus GN=Eno1 PE=3 SV=1	1	22.4964	6.15871		3.23354	1.88295		-1.86899		0.00475588
sp|Q9Z0F8|ADA17_MOUSE	Adam17	Disintegrin and metalloproteinase domain-containing protein 17 OS=Mus musculus GN=Adam17 PE=1 SV=3	6	9.06812	17.0357		0.454875	1.76709		0.909682		0.00475815
sp|Q99P88|NU155_MOUSE	Nup155	Nuclear pore complex protein Nup155 OS=Mus musculus GN=Nup155 PE=1 SV=1	41	13.7388	7.62094		1.34705	0.391426		-0.850219		0.00476233
sp|Q8JZM7|CDC73_MOUSE	Cdc73	Parafibromin OS=Mus musculus GN=Cdc73 PE=2 SV=1	16	15.9525	8.15538		1.23496	1.29523		-0.967962		0.00477371
sp|Q8K363|DDX18_MOUSE	Ddx18	ATP-dependent RNA helicase DDX18 OS=Mus musculus GN=Ddx18 PE=2 SV=1	32	14.6246	7.32004		1.36547	0.972477		-0.99847		0.00477524
sp|Q99ME9|NOG1_MOUSE	Gtpbp4	Nucleolar GTP-binding protein 1 OS=Mus musculus GN=Gtpbp4 PE=2 SV=3	29	14.2331	7.46561		1.13515	1.06419		-0.930915		0.0047981
sp|Q9Z0H1|WDR46_MOUSE	Wdr46	WD repeat-containing protein 46 OS=Mus musculus GN=Wdr46 PE=2 SV=1	13	15.3181	6.8874		1.4129	1.32795		-1.15321		0.00480042
sp|Q5SV80|MYO19_MOUSE	Myo19	Myosin-XIX OS=Mus musculus GN=Myo19 PE=2 SV=1	7	9.74273	16.5171		0.961956	1.2249		0.761562		0.00480056
sp|Q8R0J7|VP37B_MOUSE	Vps37b	Vacuolar protein sorting-associated protein 37B OS=Mus musculus GN=Vps37b PE=2 SV=1	2	14.6015	10.2017		0.420992	0.920794		-0.517307		0.00480675
sp|Q9D0W5|PPIL1_MOUSE	Ppil1	Peptidyl-prolyl cis-trans isomerase-like 1 OS=Mus musculus GN=Ppil1 PE=2 SV=1	8	16.7017	7.94914		1.96009	0.466889		-1.07113		0.00481052
sp|Q8BWS5|GRIN3_MOUSE	Gprin3	G protein-regulated inducer of neurite outgrowth 3 OS=Mus musculus GN=Gprin3 PE=1 SV=1	5	24.1879	4.17952		4.54869	0.752927		-2.53288		0.00482464
sp|Q6A4J8-2|UBP7_MOUSE	Usp7	Isoform 2 of Ubiquitin carboxyl-terminal hydrolase 7 OS=Mus musculus GN=Usp7	42	15.1237	9.56009		0.501867	1.18129		-0.661711		0.00483483
tr|E9Q1P8|E9Q1P8_MOUSE	Irf2bp2	Uncharacterized protein OS=Mus musculus GN=Irf2bp2 PE=4 SV=1	16	15.3501	8.19784		0.936568	1.3582		-0.904936		0.00483637
sp|Q9JM93|AR6P4_MOUSE	Arl6ip4	ADP-ribosylation factor-like protein 6-interacting protein 4 OS=Mus musculus GN=Arl6ip4 PE=1 SV=1	4	14.3674	10.1369		0.897702	0.384216		-0.503183		0.00483756
sp|Q6PGG6|GNL3L_MOUSE	Gnl3l	Guanine nucleotide-binding protein-like 3-like protein OS=Mus musculus GN=Gnl3l PE=2 SV=1	11	14.9866	9.22009		1.30543	0.261735		-0.700817		0.00483977
tr|E9Q411|E9Q411_MOUSE	Nbas	Uncharacterized protein OS=Mus musculus GN=Nbas PE=4 SV=1	29	7.12898	18.5304		0.625647	2.55444		1.37813		0.00483981
tr|E9QAE3|E9QAE3_MOUSE	Btaf1	Uncharacterized protein OS=Mus musculus GN=Btaf1 PE=4 SV=1	17	16.1839	8.72872		1.36587	1.04649		-0.890715		0.00484014
sp|Q99K48|NONO_MOUSE	Nono	Non-POU domain-containing octamer-binding protein OS=Mus musculus GN=Nono PE=1 SV=3	51	16.4332	8.8788		0.239944	1.72877		-0.888177		0.00484461
sp|Q8BMQ3-2|BNC2_MOUSE	Bnc2	Isoform 2 of Zinc finger protein basonuclin-2 OS=Mus musculus GN=Bnc2	1	18.329	2.65738		3.59284	0.448483		-2.78605		0.00484805
sp|Q8R2Y2|MUC18_MOUSE	Mcam	Cell surface glycoprotein MUC18 OS=Mus musculus GN=Mcam PE=1 SV=1	11	28.3271	2.24219		5.97179	0.83852		-3.6592		0.00485268
sp|Q6PDM2|SRSF1_MOUSE	Srsf1	Serine/arginine-rich splicing factor 1 OS=Mus musculus GN=Srsf1 PE=1 SV=3	43	15.1902	9.34029		0.593277	1.21643		-0.701602		0.00485925
sp|P30276|CCNB2_MOUSE	Ccnb2	G2/mitotic-specific cyclin-B2 OS=Mus musculus GN=Ccnb2 PE=2 SV=2	3	18.9954	6.16802		1.92107	2.26157		-1.62277		0.00486096
sp|Q91YL3|UCKL1_MOUSE	Uckl1	Uridine-cytidine kinase-like 1 OS=Mus musculus GN=Uckl1 PE=1 SV=1	8	6.77116	17.4548		0.281266	2.45862		1.36615		0.00487083
sp|Q7TPV2-2|DZIP3_MOUSE	Dzip3	Isoform 2 of E3 ubiquitin-protein ligase DZIP3 OS=Mus musculus GN=Dzip3	11	16.4424	10.2109		1.17319	0.841637		-0.68731		0.00487307
sp|P49117|NR2C2_MOUSE	Nr2c2	Nuclear receptor subfamily 2 group C member 2 OS=Mus musculus GN=Nr2c2 PE=1 SV=1	4	18.028	8.41257		1.46791	1.675		-1.09962		0.00487408
sp|Q64701|RBL1_MOUSE	Rbl1	Retinoblastoma-like protein 1 OS=Mus musculus GN=Rbl1 PE=1 SV=3	9	15.4482	9.27741		0.852287	1.14712		-0.735642		0.0048745
tr|B7ZNL8|B7ZNL8_MOUSE	Pus7	Pus7 protein OS=Mus musculus GN=Pus7 PE=2 SV=1	20	15.0171	8.41303		0.848706	1.2739		-0.835906		0.00487624
sp|P55271|CDN2B_MOUSE	Cdkn2b	Cyclin-dependent kinase 4 inhibitor B OS=Mus musculus GN=Cdkn2b PE=1 SV=1	1	21.6758	2.76947		4.21206	1.2187		-2.9684		0.00488367
sp|P62996|TRA2B_MOUSE	Tra2b	Transformer-2 protein homolog beta OS=Mus musculus GN=Tra2b PE=1 SV=1	11	14.6192	10.0315		0.430786	0.973614		-0.543323		0.00489184
sp|Q91ZS8-2|RED1_MOUSE	Adarb1	Isoform 2 of Double-stranded RNA-specific editase 1 OS=Mus musculus GN=Adarb1	4	17.3912	7.49708		1.6087	1.64108		-1.21396		0.00490379
sp|Q9CZT6|CC026_MOUSE		Uncharacterized protein C3orf26 homolog OS=Mus musculus PE=2 SV=1	2	13.4467	7.67844		0.834523	1.04884		-0.808371		0.00490815
sp|Q9CQU5|ZWINT_MOUSE	Zwint	ZW10 interactor OS=Mus musculus GN=Zwint PE=2 SV=1	5	15.2965	7.90631		0.454012	1.65713		-0.952123		0.00491547
tr|B2RQS1|B2RQS1_MOUSE	Strn3	Strn3 protein OS=Mus musculus GN=Strn3 PE=2 SV=1	21	8.95813	15.8359		0.335029	1.5642		0.821926		0.00491909
sp|Q61458|CCNH_MOUSE	Ccnh	Cyclin-H OS=Mus musculus GN=Ccnh PE=2 SV=2	5	14.6204	9.19177		1.14374	0.540747		-0.669565		0.00494892
sp|Q8R3F9|STPAP_MOUSE	Tut1	Speckle targeted PIP5K1A-regulated poly(A) polymerase OS=Mus musculus GN=Tut1 PE=1 SV=1	6	16.548	10.433		1.07223	0.939568		-0.665495		0.00494943
sp|Q9WTI7-3|MYO1C_MOUSE	Myo1c	Isoform 3 of Myosin-Ic OS=Mus musculus GN=Myo1c	75	8.68419	18.3238		0.795357	2.10069		1.07726		0.00495015
sp|Q8CD15|MINA_MOUSE	Mina	Myc-induced nuclear antigen OS=Mus musculus GN=Mina PE=1 SV=2	8	12.7825	8.74497		0.316468	0.886976		-0.547648		0.00495069
sp|P70404|IDHG1_MOUSE	Idh3g	Isocitrate dehydrogenase [NAD] subunit gamma 1, mitochondrial OS=Mus musculus GN=Idh3g PE=1 SV=1	16	15.4848	11.1081		0.979198	0.286656		-0.479245		0.00495098
sp|P70398|USP9X_MOUSE	Usp9x	Probable ubiquitin carboxyl-terminal hydrolase FAF-X OS=Mus musculus GN=Usp9x PE=1 SV=2	82	11.8066	13.8441		0.300138	0.36895		0.229678		0.00495141
sp|Q80ZK0|RT10_MOUSE	Mrps10	28S ribosomal protein S10, mitochondrial OS=Mus musculus GN=Mrps10 PE=2 SV=1	4	15.806	6.98428		1.8269	0.946644		-1.17829		0.00495401
sp|Q8VHZ7|IMP4_MOUSE	Imp4	U3 small nucleolar ribonucleoprotein protein IMP4 OS=Mus musculus GN=Imp4 PE=2 SV=1	9	14.7377	7.78509		1.17959	1.11551		-0.920723		0.00495453
sp|Q9JL35|HMGN5_MOUSE	Hmgn5	High mobility group nucleosome-binding domain-containing protein 5 OS=Mus musculus GN=Hmgn5 PE=1 SV=2	19	20.5613	4.67773		3.26015	1.76582		-2.13605		0.00495477
sp|P37804|TAGL_MOUSE	Tagln	Transgelin OS=Mus musculus GN=Tagln PE=1 SV=3	46	13.833	4.91577		2.05321	0.337347		-1.49262		0.0049548
sp|Q60766-2|IRGM1_MOUSE	Irgm1	Isoform 2 of Immunity-related GTPase family M protein 1 OS=Mus musculus GN=Irgm1	12	5.52941	19.8936		1.74289	2.86423		1.84711		0.0049573
sp|Q5XJE5|LEO1_MOUSE	Leo1	RNA polymerase-associated protein LEO1 OS=Mus musculus GN=Leo1 PE=1 SV=2	5	15.1751	8.39723		0.915928	1.29193		-0.853717		0.00495893
sp|P47877|IBP2_MOUSE	Igfbp2	Insulin-like growth factor-binding protein 2 OS=Mus musculus GN=Igfbp2 PE=2 SV=2	3	1.29949	31.9851		0.20936	7.16565		4.62139		0.0049595
tr|E9Q1P4|E9Q1P4_MOUSE	Cbx6	Uncharacterized protein OS=Mus musculus GN=Cbx6 PE=4 SV=1	3	17.5454	7.49497		1.70591	1.61666		-1.22709		0.00496391
sp|Q3UD82|PARP8_MOUSE	Parp8	Poly [ADP-ribose] polymerase 8 OS=Mus musculus GN=Parp8 PE=2 SV=1	2	16.7335	5.61198		2.53506	0.584371		-1.57615		0.00496629
sp|Q9QYS9-2|QKI_MOUSE	Qki	Isoform 2 of Protein quaking OS=Mus musculus GN=Qki	6	17.3328	6.27226		2.17715	1.39633		-1.46645		0.00496714
sp|P48972|MYBB_MOUSE	Mybl2	Myb-related protein B OS=Mus musculus GN=Mybl2 PE=1 SV=1	1	19.0028	5.61214		2.9822	0.953025		-1.75959		0.00496741
sp|Q8CIG8|ANM5_MOUSE	Prmt5	Protein arginine N-methyltransferase 5 OS=Mus musculus GN=Prmt5 PE=1 SV=3	19	12.882	10.1163		0.317346	0.564065		-0.348674		0.0049702
sp|Q91W40|KLC3_MOUSE	Klc3	Kinesin light chain 3 OS=Mus musculus GN=Klc3 PE=1 SV=1	8	10.2555	18.0191		0.762132	1.6515		0.813126		0.00498129
sp|Q62011|PDPN_MOUSE	Pdpn	Podoplanin OS=Mus musculus GN=Pdpn PE=1 SV=2	2	26.1987	6.65479		4.53081	0.658195		-1.97703		0.00498313
sp|Q9R0Q4|MO4L2_MOUSE	Morf4l2	Mortality factor 4-like protein 2 OS=Mus musculus GN=Morf4l2 PE=1 SV=1	6	17.0807	8.36029		0.921004	1.82336		-1.03074		0.0049859
sp|Q9D287|SPF27_MOUSE	Bcas2	Pre-mRNA-splicing factor SPF27 OS=Mus musculus GN=Bcas2 PE=2 SV=1	10	16.5792	7.3271		1.56482	1.50408		-1.17806		0.00500273
sp|P62320|SMD3_MOUSE	Snrpd3	Small nuclear ribonucleoprotein Sm D3 OS=Mus musculus GN=Snrpd3 PE=1 SV=1	4	15.6686	8.4072		1.51593	0.779284		-0.898175		0.0050108
sp|Q8BG32|PSD11_MOUSE	Psmd11	26S proteasome non-ATPase regulatory subunit 11 OS=Mus musculus GN=Psmd11 PE=1 SV=3	42	13.9817	9.5516		0.667535	0.797805		-0.549729		0.00501321
tr|A2A7B5|A2A7B5_MOUSE	Prdm2	PR domain containing 2, with ZNF domain OS=Mus musculus GN=Prdm2 PE=4 SV=1	5	18.9775	7.17045		2.4041	1.38449		-1.40415		0.00502233
sp|Q61686|CBX5_MOUSE	Cbx5	Chromobox protein homolog 5 OS=Mus musculus GN=Cbx5 PE=1 SV=1	17	16.4868	6.4368		1.40184	1.90099		-1.3569		0.00502322
sp|P54823|DDX6_MOUSE	Ddx6	Probable ATP-dependent RNA helicase DDX6 OS=Mus musculus GN=Ddx6 PE=2 SV=1	23	14.9696	9.93387		1.1656	0.2155		-0.591604		0.0050355
sp|Q5U5M8|BL1S3_MOUSE	Bloc1s3	Biogenesis of lysosome-related organelles complex 1 subunit 3 OS=Mus musculus GN=Bloc1s3 PE=1 SV=1	3	8.27648	19.4716		0.702037	2.53972		1.23428		0.00503714
sp|P97473|TRBP2_MOUSE	Tarbp2	RISC-loading complex subunit TARBP2 OS=Mus musculus GN=Tarbp2 PE=1 SV=2	4	12.5733	7.22961		0.817975	0.956047		-0.798377		0.00503732
sp|P24547|IMDH2_MOUSE	Impdh2	Inosine-5'-monophosphate dehydrogenase 2 OS=Mus musculus GN=Impdh2 PE=1 SV=2	37	17.3856	7.619		1.94914	1.21737		-1.19022		0.00503856
sp|Q4VAA7|SNX33_MOUSE	Snx33	Sorting nexin-33 OS=Mus musculus GN=Snx33 PE=2 SV=1	5	11.1718	15.557		0.996429	0.268906		0.47771		0.00503928
sp|O54804-2|CHKA_MOUSE	Chka	Isoform 2 of Choline kinase alpha OS=Mus musculus GN=Chka	4	16.081	7.5404		1.83876	0.81032		-1.09265		0.00504012
sp|Q8VHG2-2|AMOT_MOUSE	Amot	Isoform 2 of Angiomotin OS=Mus musculus GN=Amot	13	10.0146	16.0341		1.33745	0.474565		0.679041		0.00505811
sp|Q9CQU1|MFAP1_MOUSE	Mfap1	Microfibrillar-associated protein 1 OS=Mus musculus GN=Mfap1 PE=1 SV=1	11	15.4399	9.2431		0.641552	1.31326		-0.740217		0.00506289
sp|Q04690-2|NF1_MOUSE	Nf1	Isoform 1 of Neurofibromin OS=Mus musculus GN=Nf1	34	10.8763	15.3651		0.276283	1.02309		0.498466		0.00507765
sp|Q6PAC3|DCA13_MOUSE	Dcaf13	DDB1- and CUL4-associated factor 13 OS=Mus musculus GN=Dcaf13 PE=2 SV=2	13	14.6176	7.28923		1.16073	1.28443		-1.00387		0.00508603
sp|Q91Z31-2|PTBP2_MOUSE	Ptbp2	Isoform 2 of Polypyrimidine tract-binding protein 2 OS=Mus musculus GN=Ptbp2	19	16.3545	6.75907		1.53309	1.6708		-1.27479		0.00508953
sp|Q8CC21|TTC19_MOUSE	Ttc19	Tetratricopeptide repeat protein 19, mitochondrial OS=Mus musculus GN=Ttc19 PE=1 SV=1	2	11.952	6.63804		0.656954	1.07189		-0.848419		0.00510404
sp|Q80UW0-2|H6ST2_MOUSE	Hs6st2	Isoform 2 of Heparan-sulfate 6-O-sulfotransferase 2 OS=Mus musculus GN=Hs6st2	8	9.11464	19.8882		1.25118	2.2202		1.12566		0.00510464
sp|Q9EP82|WDR4_MOUSE	Wdr4	tRNA (guanine-N(7)-)-methyltransferase subunit WDR4 OS=Mus musculus GN=Wdr4 PE=1 SV=2	8	16.2735	7.63944		0.954003	1.80816		-1.09099		0.00511654
sp|Q62393-2|TPD52_MOUSE	Tpd52	Isoform 2 of Tumor protein D52 OS=Mus musculus GN=Tpd52	4	17.3486	6.13301		2.0648	1.67412		-1.50015		0.00513157
tr|A2ADB0|A2ADB0_MOUSE	Spen	SPEN homolog, transcriptional regulator (Drosophila) OS=Mus musculus GN=Spen PE=4 SV=1	10	15.7599	9.25854		0.44846	1.47506		-0.767402		0.00513854
sp|O70400|PDLI1_MOUSE	Pdlim1	PDZ and LIM domain protein 1 OS=Mus musculus GN=Pdlim1 PE=2 SV=4	29	16.0227	5.85845		0.916204	2.23311		-1.45152		0.00516253
sp|Q68FD9|K1549_MOUSE	Kiaa1549	UPF0606 protein KIAA1549 OS=Mus musculus GN=Kiaa1549 PE=1 SV=3	5	16.5819	9.55515		1.50921	0.714175		-0.795259		0.00517031
sp|Q9CQP0|RM33_MOUSE	Mrpl33	39S ribosomal protein L33, mitochondrial OS=Mus musculus GN=Mrpl33 PE=2 SV=1	3	14.9095	7.86587		1.46649	0.80754		-0.922554		0.00517212
sp|Q8R138|TM119_MOUSE	Tmem119	Transmembrane protein 119 OS=Mus musculus GN=Tmem119 PE=2 SV=1	3	9.10379	2.31324		1.51671	0.557482		-1.97655		0.00519202
sp|Q8R422|CD109_MOUSE	Cd109	CD109 antigen OS=Mus musculus GN=Cd109 PE=2 SV=1	46	8.00789	22.2632		0.889032	3.27437		1.47517		0.00519211
sp|Q9D903|EBP2_MOUSE	Ebna1bp2	Probable rRNA-processing protein EBP2 OS=Mus musculus GN=Ebna1bp2 PE=2 SV=1	24	14.2036	6.09266		1.3467	1.38376		-1.22112		0.00519263
tr|E9Q1A5|E9Q1A5_MOUSE	Zfp384	Uncharacterized protein OS=Mus musculus GN=Zfp384 PE=4 SV=1	6	16.2418	8.20952		0.208596	1.90209		-0.984341		0.0052026
sp|Q00422|GABPA_MOUSE	Gabpa	GA-binding protein alpha chain OS=Mus musculus GN=Gabpa PE=1 SV=2	9	16.0242	9.16983		0.941546	1.33503		-0.805282		0.00520829
sp|Q91YU8|SSF1_MOUSE	Ppan	Suppressor of SWI4 1 homolog OS=Mus musculus GN=Ppan PE=2 SV=2	11	15.5677	7.07079		1.82503	0.880176		-1.13862		0.00521482
sp|Q80WG5|LRC8A_MOUSE	Lrrc8a	Leucine-rich repeat-containing protein 8A OS=Mus musculus GN=Lrrc8a PE=1 SV=1	9	15.2819	9.41102		1.35203	0.365903		-0.699404		0.00521727
sp|Q9JIS8|S12A4_MOUSE	Slc12a4	Solute carrier family 12 member 4 OS=Mus musculus GN=Slc12a4 PE=1 SV=2	19	8.82993	16.5197		0.864433	1.61795		0.903711		0.00521871
sp|Q8CID3|FA20A_MOUSE	Fam20a	Protein FAM20A OS=Mus musculus GN=Fam20a PE=1 SV=1	1	5.90225	24.0955		0.8284	4.26855		2.02943		0.00523423
sp|Q9ERI5-2|JMJD6_MOUSE	Jmjd6	Isoform 2 of Bifunctional arginine demethylase and lysyl-hydroxylase JMJD6 OS=Mus musculus GN=Jmjd6	5	15.6611	7.16036		0.424274	1.98618		-1.12908		0.00523463
sp|Q8BGQ1-2|VIPAR_MOUSE	Vipar	Isoform 2 of VPS33B-interacting protein OS=Mus musculus GN=Vipar	5	8.21273	18.6889		0.219726	2.49303		1.18625		0.00523614
sp|Q6AXC6|DDX11_MOUSE	Ddx11	Probable ATP-dependent RNA helicase DDX11 OS=Mus musculus GN=Ddx11 PE=2 SV=1	2	16.1736	5.77357		1.90927	1.58925		-1.48611		0.00523693
sp|Q64314|CD34_MOUSE	Cd34	Hematopoietic progenitor cell antigen CD34 OS=Mus musculus GN=Cd34 PE=1 SV=1	11	29.301	2.17327		6.46105	0.536838		-3.75301		0.00523709
sp|Q7TN75|PEG10_MOUSE	Peg10	Retrotransposon-derived protein PEG10 OS=Mus musculus GN=Peg10 PE=1 SV=2	2	12.3416	3.24456		2.02854	0.785374		-1.92744		0.00524031
sp|P46718|PDCD2_MOUSE	Pdcd2	Programmed cell death protein 2 OS=Mus musculus GN=Pdcd2 PE=2 SV=2	5	14.3558	8.21306		1.42893	0.342424		-0.805639		0.00524424
sp|Q6NWV3-2|IF122_MOUSE	Ift122	Isoform 2 of Intraflagellar transport protein 122 homolog OS=Mus musculus GN=Ift122	15	8.20526	19.7542		0.534592	2.71273		1.26754		0.00525354
sp|Q7TMY8|HUWE1_MOUSE	Huwe1	E3 ubiquitin-protein ligase HUWE1 OS=Mus musculus GN=Huwe1 PE=1 SV=5	80	15.2067	10.4235		0.302372	1.10432		-0.544864		0.00525429
sp|O08749|DLDH_MOUSE	Dld	Dihydrolipoyl dehydrogenase, mitochondrial OS=Mus musculus GN=Dld PE=1 SV=2	30	9.00418	16.206		0.733457	1.56111		0.847858		0.00525752
sp|Q99N94|RM09_MOUSE	Mrpl9	39S ribosomal protein L9, mitochondrial OS=Mus musculus GN=Mrpl9 PE=2 SV=2	6	14.816	8.72418		1.11892	0.937939		-0.764065		0.00526457
tr|D3Z7P3|D3Z7P3_MOUSE	Gls	Uncharacterized protein OS=Mus musculus GN=Gls PE=3 SV=1	20	9.9054	17.2125		1.22536	1.25107		0.797169		0.00526694
sp|Q6VNB8|WDFY3_MOUSE	Wdfy3	WD repeat and FYVE domain-containing protein 3 OS=Mus musculus GN=Wdfy3 PE=1 SV=1	27	11.2128	15.2618		0.384975	0.892117		0.44478		0.00526776
sp|Q9Z0M6-3|CD97_MOUSE	Cd97	Isoform 3 of CD97 antigen OS=Mus musculus GN=Cd97	5	4.31406	15.3176		0.664092	2.55624		1.82807		0.00526851
sp|Q923W1|TGS1_MOUSE	Tgs1	Trimethylguanosine synthase OS=Mus musculus GN=Tgs1 PE=1 SV=2	3	16.2358	9.1344		1.29255	1.11304		-0.829799		0.0052687
sp|Q8CIE6|COPA_MOUSE	Copa	Coatomer subunit alpha OS=Mus musculus GN=Copa PE=1 SV=2	90	10.9486	15.497		0.259161	1.06013		0.501243		0.00526901
sp|P0C7N9|PSMG4_MOUSE	Psmg4	Proteasome assembly chaperone 4 OS=Mus musculus GN=Psmg4 PE=1 SV=1	1	16.9952	6.02192		2.39643	1.09448		-1.49683		0.00527026
sp|P83870|PHF5A_MOUSE	Phf5a	PHD finger-like domain-containing protein 5A OS=Mus musculus GN=Phf5a PE=1 SV=1	7	14.0395	8.7079		0.655317	1.0986		-0.689091		0.00527166
sp|Q9D924|ISCA1_MOUSE	Isca1	Iron-sulfur cluster assembly 1 homolog, mitochondrial OS=Mus musculus GN=Isca1 PE=2 SV=1	6	16.0536	9.13804		1.09552	1.24861		-0.812943		0.00527204
sp|Q6DFV3|RHG21_MOUSE	Arhgap21	Rho GTPase-activating protein 21 OS=Mus musculus GN=Arhgap21 PE=1 SV=1	14	9.92142	16.8526		0.650864	1.53212		0.764355		0.00527329
sp|Q9CSN1|SNW1_MOUSE	Snw1	SNW domain-containing protein 1 OS=Mus musculus GN=Snw1 PE=1 SV=3	19	14.4373	8.90166		0.632672	1.16776		-0.697651		0.0052749
sp|O70201|BIRC5_MOUSE	Birc5	Baculoviral IAP repeat-containing protein 5 OS=Mus musculus GN=Birc5 PE=1 SV=1	1	21.3826	4.57706		3.59398	1.82483		-2.22394		0.00527531
sp|Q501J7-2|PHAR4_MOUSE	Phactr4	Isoform 2 of Phosphatase and actin regulator 4 OS=Mus musculus GN=Phactr4	12	17.1925	8.57859		1.60551	1.30112		-1.00297		0.00527677
sp|Q80YR5|SAFB2_MOUSE	Safb2	Scaffold attachment factor B2 OS=Mus musculus GN=Safb2 PE=1 SV=2	22	14.9721	10.3608		0.51309	0.982806		-0.53114		0.00528419
sp|O35640|ANXA8_MOUSE	Anxa8	Annexin A8 OS=Mus musculus GN=Anxa8 PE=2 SV=2	25	4.147	28.4091		1.45997	5.6548		2.77621		0.00530436
sp|Q9EQQ0|SUV92_MOUSE	Suv39h2	Histone-lysine N-methyltransferase SUV39H2 OS=Mus musculus GN=Suv39h2 PE=1 SV=1	6	17.5173	6.39349		0.498641	2.63242		-1.45411		0.00530532
tr|E9PYH6|E9PYH6_MOUSE	Setd1a	Uncharacterized protein OS=Mus musculus GN=Setd1a PE=3 SV=1	6	15.2401	9.60391		0.620573	1.2071		-0.666179		0.00530555
sp|Q6A0A9|F120A_MOUSE	FAM120A	Constitutive coactivator of PPAR-gamma-like protein 1 OS=Mus musculus GN=FAM120A PE=1 SV=2	48	11.0647	15.2316		0.227574	0.977152		0.461096		0.00530649
sp|Q8VCG3|WDR74_MOUSE	Wdr74	WD repeat-containing protein 74 OS=Mus musculus GN=Wdr74 PE=2 SV=1	7	16.0501	7.27951		1.78583	1.13087		-1.14067		0.00531436
sp|P97783|AF1Q_MOUSE	Mllt11	Protein AF1q OS=Mus musculus GN=Mllt11 PE=2 SV=1	1	19.116	6.68873		2.76344	1.15717		-1.51497		0.0053167
sp|Q8CCS6-2|PABP2_MOUSE	Pabpn1	Isoform 2 of Polyadenylate-binding protein 2 OS=Mus musculus GN=Pabpn1	8	14.1881	10.5101		0.579109	0.672003		-0.432903		0.00532267
tr|E9PVA6|E9PVA6_MOUSE	Git2	Uncharacterized protein OS=Mus musculus GN=Git2 PE=4 SV=1	2	10.1982	17.7619		1.61053	0.859542		0.800469		0.00532541
sp|Q8C033-2|ARHGA_MOUSE	Arhgef10	Isoform 2 of Rho guanine nucleotide exchange factor 10 OS=Mus musculus GN=Arhgef10	9	9.28559	19.2093		0.262906	2.38128		1.04874		0.00532685
sp|Q9R001|ATS5_MOUSE	Adamts5	A disintegrin and metalloproteinase with thrombospondin motifs 5 OS=Mus musculus GN=Adamts5 PE=2 SV=2	3	4.35433	22.3562		1.6143	4.03263		2.36015		0.0053274
sp|Q3UL36|ARGL1_MOUSE	Arglu1	Arginine and glutamate-rich protein 1 OS=Mus musculus GN=Arglu1 PE=1 SV=2	12	16.3422	9.39946		0.253883	1.65624		-0.797949		0.00532809
sp|Q9ERA6|TFP11_MOUSE	Tfip11	Tuftelin-interacting protein 11 OS=Mus musculus GN=Tfip11 PE=1 SV=1	19	16.5243	8.3671		1.73284	0.936748		-0.981793		0.00532877
tr|Q91XX1|Q91XX1_MOUSE	Pcdhgc3	Protocadherin gamma C3 OS=Mus musculus GN=Pcdhgc3 PE=2 SV=1	6	5.76762	17.7256		0.76524	2.78679		1.61978		0.0053377
tr|B2RQG2|B2RQG2_MOUSE	Phf3	PHD finger protein 3 OS=Mus musculus GN=Phf3 PE=2 SV=1	26	14.8812	11.1173		0.411816	0.810971		-0.420684		0.00533903
sp|Q921F2|TADBP_MOUSE	Tardbp	TAR DNA-binding protein 43 OS=Mus musculus GN=Tardbp PE=1 SV=1	20	16.0377	8.88462		0.595728	1.62376		-0.852082		0.00534433
sp|Q62179|SEM4B_MOUSE	Sema4b	Semaphorin-4B OS=Mus musculus GN=Sema4b PE=1 SV=2	2	17.0253	9.22994		0.334246	1.85653		-0.883287		0.00535648
sp|Q9CR55|CP087_MOUSE		UPF0547 protein C16orf87 homolog OS=Mus musculus PE=2 SV=1	1	17.9812	8.08108		1.7891	1.59536		-1.15387		0.00536095
sp|Q8CHP0|ZC3H3_MOUSE	Zc3h3	Zinc finger CCCH domain-containing protein 3 OS=Mus musculus GN=Zc3h3 PE=2 SV=1	2	13.1359	7.3754		0.614888	1.25184		-0.832726		0.00536338
sp|Q3UM45|PP1R7_MOUSE	Ppp1r7	Protein phosphatase 1 regulatory subunit 7 OS=Mus musculus GN=Ppp1r7 PE=1 SV=2	18	9.14672	16.2769		1.47294	0.906157		0.831503		0.0053667
sp|Q8VC19|HEM1_MOUSE	Alas1	5-aminolevulinate synthase, nonspecific, mitochondrial OS=Mus musculus GN=Alas1 PE=2 SV=2	6	9.02961	15.7209		1.38135	0.848177		0.799946		0.00536772
sp|O88491|NSD1_MOUSE	Nsd1	Histone-lysine N-methyltransferase, H3 lysine-36 and H4 lysine-20 specific OS=Mus musculus GN=Nsd1 PE=1 SV=1	4	17.7747	6.99849		2.09359	1.56437		-1.34471		0.00536907
tr|Q8VDU3|Q8VDU3_MOUSE	Apol9a	Apol9a protein OS=Mus musculus GN=Apol9a PE=2 SV=1	1	12.4203	4.39871		1.86945	0.532423		-1.49754		0.00536988
sp|P0C605-2|KGP1_MOUSE	Prkg1	Isoform Beta of cGMP-dependent protein kinase 1 OS=Mus musculus GN=Prkg1	8	18.7925	6.21918		2.15574	2.15654		-1.59536		0.00537197
sp|Q61508|ECM1_MOUSE	Ecm1	Extracellular matrix protein 1 OS=Mus musculus GN=Ecm1 PE=1 SV=2	10	16.9934	8.88266		1.57227	1.18162		-0.93591		0.00537345
sp|Q8CCJ3|UFL1_MOUSE	Ufl1	E3 UFM1-protein ligase 1 OS=Mus musculus GN=Ufl1 PE=1 SV=2	25	10.0754	17.1731		0.99198	1.40649		0.769312		0.00537688
sp|Q9CQJ2|PIHD1_MOUSE	Pih1d1	PIH1 domain-containing protein 1 OS=Mus musculus GN=Pih1d1 PE=2 SV=1	9	14.0374	8.58325		1.29433	0.271405		-0.709684		0.00537874
sp|P48377|RFX1_MOUSE	Rfx1	MHC class II regulatory factor RFX1 OS=Mus musculus GN=Rfx1 PE=2 SV=2	9	15.6195	9.75267		0.701604	1.2395		-0.679479		0.00538241
sp|Q923T9-3|KCC2G_MOUSE	Camk2g	Isoform 3 of Calcium/calmodulin-dependent protein kinase type II subunit gamma OS=Mus musculus GN=Camk2g	1	8.44003	14.0217		0.589626	1.2204		0.732345		0.0053833
sp|Q9CQS2|NOP10_MOUSE	Nop10	H/ACA ribonucleoprotein complex subunit 3 OS=Mus musculus GN=Nop10 PE=2 SV=1	3	18.551	4.348		3.26846	1.10673		-2.09307		0.00538741
sp|Q3UA06|PCH2_MOUSE	Trip13	Pachytene checkpoint protein 2 homolog OS=Mus musculus GN=Trip13 PE=2 SV=1	12	17.0166	5.98817		2.10906	1.65261		-1.50675		0.00539058
tr|E9Q317|E9Q317_MOUSE	Sap18	Uncharacterized protein OS=Mus musculus GN=Sap18 PE=4 SV=1	13	15.5496	8.88742		0.291891	1.59513		-0.807043		0.00539261
sp|Q6PDL0|DC1L2_MOUSE	Dync1li2	Cytoplasmic dynein 1 light intermediate chain 2 OS=Mus musculus GN=Dync1li2 PE=1 SV=2	18	7.85036	19.4667		0.658066	2.74975		1.31018		0.00539551
sp|P55821|STMN2_MOUSE	Stmn2	Stathmin-2 OS=Mus musculus GN=Stmn2 PE=2 SV=1	3	23.1277	6.47851		3.20999	2.46924		-1.83589		0.00539701
sp|Q8K409|DPOLB_MOUSE	Polb	DNA polymerase beta OS=Mus musculus GN=Polb PE=2 SV=3	5	15.3245	8.71726		0.673734	1.4589		-0.813896		0.00539764
sp|Q9ESE1-2|LRBA_MOUSE	Lrba	Isoform 2 of Lipopolysaccharide-responsive and beige-like anchor protein OS=Mus musculus GN=Lrba	4	18.795	7.80189		2.58393	0.68345		-1.26846		0.00539828
sp|Q8BX09|RBBP5_MOUSE	Rbbp5	Retinoblastoma-binding protein 5 OS=Mus musculus GN=Rbbp5 PE=1 SV=2	3	15.4412	10.0847		0.424802	1.23233		-0.61461		0.00539866
sp|Q3V1N1|MFHA1_MOUSE	Mfhas1	Malignant fibrous histiocytoma-amplified sequence 1 homolog OS=Mus musculus GN=Mfhas1 PE=2 SV=2	1	15.5467	10.4694		1.00296	0.721996		-0.570434		0.00539893
sp|Q8BGY2|IF5A2_MOUSE	Eif5a2	Eukaryotic translation initiation factor 5A-2 OS=Mus musculus GN=Eif5a2 PE=2 SV=3	1	15.4664	10.8972		0.874114	0.690137		-0.505176		0.00539969
sp|P47740|AL3A2_MOUSE	Aldh3a2	Fatty aldehyde dehydrogenase OS=Mus musculus GN=Aldh3a2 PE=2 SV=2	9	9.01604	15.3792		0.635264	1.4111		0.770418		0.00540004
sp|Q9D1A2|CNDP2_MOUSE	Cndp2	Cytosolic non-specific dipeptidase OS=Mus musculus GN=Cndp2 PE=1 SV=1	14	6.60433	17.3104		0.426851	2.57405		1.39015		0.00540043
sp|Q8BW10|NOB1_MOUSE	Nob1	RNA-binding protein NOB1 OS=Mus musculus GN=Nob1 PE=1 SV=1	11	14.7929	7.51298		0.850463	1.55393		-0.977444		0.00540073
sp|Q8CH77-2|NAV1_MOUSE	Nav1	Isoform 2 of Neuron navigator 1 OS=Mus musculus GN=Nav1	6	10.779	5.17952		1.06639	0.850075		-1.05733		0.00540104
sp|P42230|STA5A_MOUSE	Stat5a	Signal transducer and activator of transcription 5A OS=Mus musculus GN=Stat5a PE=1 SV=1	14	10.709	18.7044		1.10604	1.60313		0.804548		0.00540155
sp|P62960|YBOX1_MOUSE	Ybx1	Nuclease-sensitive element-binding protein 1 OS=Mus musculus GN=Ybx1 PE=1 SV=3	51	14.5671	8.85663		0.450483	1.31674		-0.717887		0.00540315
sp|Q99N85|RT18A_MOUSE	Mrps18a	28S ribosomal protein S18a, mitochondrial OS=Mus musculus GN=Mrps18a PE=2 SV=1	2	14.0489	11.0695		0.630454	0.360012		-0.343866		0.00540434
sp|Q8BU11|TOX4_MOUSE	Tox4	TOX high mobility group box family member 4 OS=Mus musculus GN=Tox4 PE=1 SV=3	7	14.7604	9.03513		0.579058	1.27085		-0.708111		0.00541147
sp|O08917|FLOT1_MOUSE	Flot1	Flotillin-1 OS=Mus musculus GN=Flot1 PE=1 SV=1	11	10.2356	15.2914		0.53092	1.11458		0.57913		0.00541167
sp|Q14AI6-2|RUSD3_MOUSE	Rpusd3	Isoform 2 of RNA pseudouridylate synthase domain-containing protein 3 OS=Mus musculus GN=Rpusd3	1	14.7937	6.67974		1.97809	0.09663		-1.14712		0.00541327
sp|P62313|LSM6_MOUSE	Lsm6	U6 snRNA-associated Sm-like protein LSm6 OS=Mus musculus GN=Lsm6 PE=2 SV=1	6	16.4827	8.30386		1.92514	0.530882		-0.989096		0.00541355
sp|O09000|NCOA3_MOUSE	Ncoa3	Nuclear receptor coactivator 3 OS=Mus musculus GN=Ncoa3 PE=1 SV=2	2	16.0967	7.61581		1.58713	1.32882		-1.0797		0.00541625
sp|Q9CZ82|MED18_MOUSE	Med18	Mediator of RNA polymerase II transcription subunit 18 OS=Mus musculus GN=Med18 PE=2 SV=1	1	16.944	6.23641		2.16434	1.46659		-1.44199		0.00541695
sp|Q05512-2|MARK2_MOUSE	Mark2	Isoform 2 of Serine/threonine-protein kinase MARK2 OS=Mus musculus GN=Mark2	8	12.0675	16.3104		0.389534	0.960647		0.434672		0.00541876
sp|B1ARW8|CA122_MOUSE		Uncharacterized protein C1orf122 homolog OS=Mus musculus PE=4 SV=1	1	19.1817	6.60001		2.31764	2.01456		-1.53919		0.00541963
sp|A2A8L5|PTPRF_MOUSE	Ptprf	Receptor-type tyrosine-protein phosphatase F OS=Mus musculus GN=Ptprf PE=1 SV=1	8	6.99863	19.7845		1.18798	2.89086		1.49923		0.00542254
sp|Q8CGC6|RBM28_MOUSE	Rbm28	RNA-binding protein 28 OS=Mus musculus GN=Rbm28 PE=1 SV=4	24	14.5476	7.0999		1.43635	1.1181		-1.03491		0.00542264
sp|Q8BX05-2|GLPK5_MOUSE	Gk5	Isoform 2 of Putative glycerol kinase 5 OS=Mus musculus GN=Gk5	1	15.2748	8.36717		0.947603	1.39854		-0.868344		0.00542862
sp|Q9CPY7|AMPL_MOUSE	Lap3	Cytosol aminopeptidase OS=Mus musculus GN=Lap3 PE=1 SV=3	48	14.2903	9.45584		0.322233	1.13807		-0.595755		0.00543374
sp|P18572-2|BASI_MOUSE	Bsg	Isoform 2 of Basigin OS=Mus musculus GN=Bsg	11	13.8427	8.54717		0.617913	1.14002		-0.695606		0.00543672
sp|P81269|ATF1_MOUSE	Atf1	Cyclic AMP-dependent transcription factor ATF-1 OS=Mus musculus GN=Atf1 PE=2 SV=1	7	15.9322	7.85623		1.38185	1.4142		-1.02003		0.00543711
sp|Q8BP00-2|IQCB1_MOUSE	Iqcb1	Isoform 2 of IQ calmodulin-binding motif-containing protein 1 OS=Mus musculus GN=Iqcb1	6	16.8293	8.49597		0.992017	1.78206		-0.986127		0.00543715
sp|Q8BXR9-2|OSBL6_MOUSE	Osbpl6	Isoform 2 of Oxysterol-binding protein-related protein 6 OS=Mus musculus GN=Osbpl6	2	8.95868	3.30784		1.34276	0.332586		-1.4374		0.00543815
sp|P50295|ARY2_MOUSE	Nat2	Arylamine N-acetyltransferase 2 OS=Mus musculus GN=Nat2 PE=1 SV=1	2	9.29491	19.3139		1.90362	1.55323		1.05513		0.00544503
sp|Q9R0G7|ZEB2_MOUSE	Zeb2	Zinc finger E-box-binding homeobox 2 OS=Mus musculus GN=Zeb2 PE=1 SV=2	6	12.6696	7.54874		0.879988	0.89464		-0.747068		0.00544507
sp|Q8VE99|CC115_MOUSE	Ccdc115	Coiled-coil domain-containing protein 115 OS=Mus musculus GN=Ccdc115 PE=2 SV=1	2	16.8254	7.28807		0.496389	2.28354		-1.20703		0.00544601
sp|Q8BIH0-2|SP130_MOUSE	Sap130	Isoform 2 of Histone deacetylase complex subunit SAP130 OS=Mus musculus GN=Sap130	4	14.9863	8.9453		0.626985	1.34258		-0.744439		0.00544686
sp|Q9DCF9-2|SSRG_MOUSE	Ssr3	Isoform 2 of Translocon-associated protein subunit gamma OS=Mus musculus GN=Ssr3	3	15.6098	9.92161		0.752047	1.17578		-0.653806		0.00544696
sp|Q924T2|RT02_MOUSE	Mrps2	28S ribosomal protein S2, mitochondrial OS=Mus musculus GN=Mrps2 PE=2 SV=1	6	15.6106	7.92471		1.84822	0.368777		-0.978095		0.00544752
tr|F6WIU1|F6WIU1_MOUSE	Kri1	Uncharacterized protein (Fragment) OS=Mus musculus GN=Kri1 PE=4 SV=1	12	14.5317	7.95237		0.793337	1.40576		-0.869749		0.00544773
sp|P62827|RAN_MOUSE	Ran	GTP-binding nuclear protein Ran OS=Mus musculus GN=Ran PE=1 SV=3	18	15.1413	8.67152		0.834357	1.34917		-0.804129		0.00544949
sp|Q80Y44|DDX10_MOUSE	Ddx10	Probable ATP-dependent RNA helicase DDX10 OS=Mus musculus GN=Ddx10 PE=1 SV=2	20	14.9913	7.43716		1.4505	1.15158		-1.0113		0.00545131
sp|Q9QY36|NAA10_MOUSE	Naa10	N-alpha-acetyltransferase 10, NatA catalytic subunit OS=Mus musculus GN=Naa10 PE=1 SV=1	14	16.2014	7.43339		0.777507	2.00801		-1.12403		0.00546117
sp|Q91YI0|ARLY_MOUSE	Asl	Argininosuccinate lyase OS=Mus musculus GN=Asl PE=2 SV=1	16	8.63961	18.3033		0.83979	2.22144		1.08307		0.00546461
sp|Q8C3I8|F203A_MOUSE	Fam203a	Protein FAM203A OS=Mus musculus GN=Fam203a PE=2 SV=1	6	14.6653	4.45125		2.23239	1.14686		-1.72012		0.00546515
sp|Q9DA08|SGF29_MOUSE	Ccdc101	SAGA-associated factor 29 homolog OS=Mus musculus GN=Ccdc101 PE=2 SV=1	3	16.4828	7.43837		1.70993	1.41895		-1.14791		0.00546526
sp|Q8BY71|HAT1_MOUSE	Hat1	Histone acetyltransferase type B catalytic subunit OS=Mus musculus GN=Hat1 PE=2 SV=1	13	17.6265	6.46898		2.42493	1.28507		-1.44614		0.00546857
sp|P59764|DOCK4_MOUSE	Dock4	Dedicator of cytokinesis protein 4 OS=Mus musculus GN=Dock4 PE=1 SV=1	1	7.28987	19.2614		1.58799	2.47957		1.40175		0.00547116
sp|Q6P6J0|ADAT2_MOUSE	Adat2	tRNA-specific adenosine deaminase 2 OS=Mus musculus GN=Adat2 PE=2 SV=1	3	15.993	6.98544		2.00906	0.932897		-1.19501		0.00547122
tr|A2AHG2|A2AHG2_MOUSE	Phf21a	PHD finger protein 21A OS=Mus musculus GN=Phf21a PE=4 SV=1	4	16.1644	8.47161		1.83793	0.447669		-0.932112		0.00547355
sp|Q9WTU0|PHF2_MOUSE	Phf2	Lysine-specific demethylase PHF2 OS=Mus musculus GN=Phf2 PE=1 SV=2	15	16.2718	10.8984		0.699848	1.12258		-0.578255		0.00547658
sp|Q5U458|DJC11_MOUSE	Dnajc11	DnaJ homolog subfamily C member 11 OS=Mus musculus GN=Dnajc11 PE=2 SV=2	11	16.6466	7.89153		2.09938	0.487351		-1.07685		0.00547818
sp|P28654|PGS2_MOUSE	Dcn	Decorin OS=Mus musculus GN=Dcn PE=2 SV=1	1	11.5318	3.8489		1.68056	0.86747		-1.5831		0.00548134
sp|Q9R1S8|CAN7_MOUSE	Capn7	Calpain-7 OS=Mus musculus GN=Capn7 PE=2 SV=1	9	6.18983	21.4818		0.39219	3.74781		1.79514		0.00548901
sp|Q3TVC7|CCDB1_MOUSE	Ccndbp1	Cyclin-D1-binding protein 1 OS=Mus musculus GN=Ccndbp1 PE=2 SV=1	4	16.0079	9.78495		0.811096	1.30121		-0.710148		0.0054902
sp|Q9CPT5|NOP16_MOUSE	Nop16	Nucleolar protein 16 OS=Mus musculus GN=Nop16 PE=2 SV=1	7	14.6095	7.79085		1.40946	0.917202		-0.907057		0.00549493
sp|Q8K448|ABCA5_MOUSE	Abca5	ATP-binding cassette sub-family A member 5 OS=Mus musculus GN=Abca5 PE=1 SV=2	2	11.88	4.41456		1.37522	1.22403		-1.4282		0.00549759
sp|P56391|CX6B1_MOUSE	Cox6b1	Cytochrome c oxidase subunit 6B1 OS=Mus musculus GN=Cox6b1 PE=1 SV=2	8	9.31443	16.5899		1.003	1.48849		0.832769		0.00549841
sp|Q99N95|RM03_MOUSE	Mrpl3	39S ribosomal protein L3, mitochondrial OS=Mus musculus GN=Mrpl3 PE=2 SV=1	8	14.5116	9.5622		0.903321	0.820679		-0.601788		0.00549931
sp|P39429-2|TRAF2_MOUSE	Traf2	Isoform 2 of TNF receptor-associated factor 2 OS=Mus musculus GN=Traf2	2	14.3316	10.4591		0.606224	0.74085		-0.454441		0.00550128
sp|Q9ESZ8-2|GTF2I_MOUSE	Gtf2i	Isoform 2 of General transcription factor II-I OS=Mus musculus GN=Gtf2i	40	13.783	9.94694		0.442067	0.837132		-0.470562		0.00550204
sp|O54931-3|AKAP2_MOUSE	Akap2	Isoform 3 of A-kinase anchor protein 2 OS=Mus musculus GN=Akap2	22	9.82681	16.6523		1.08528	1.2924		0.760926		0.00550268
sp|Q8BP40|PPA6_MOUSE	Acp6	Lysophosphatidic acid phosphatase type 6 OS=Mus musculus GN=Acp6 PE=2 SV=1	5	19.9609	1.49012		4.56108	0.181551		-3.74367		0.00550271
sp|Q9DAW6|PRP4_MOUSE	Prpf4	U4/U6 small nuclear ribonucleoprotein Prp4 OS=Mus musculus GN=Prpf4 PE=2 SV=1	31	16.7143	7.77266		1.76771	1.32695		-1.1046		0.00550456
sp|Q9D7Z3|NOL7_MOUSE	Nol7	Nucleolar protein 7 OS=Mus musculus GN=Nol7 PE=1 SV=1	2	15.3607	7.45352		0.297965	1.9311		-1.04325		0.00550458
sp|Q7TPW1|NEXN_MOUSE	Nexn	Nexilin OS=Mus musculus GN=Nexn PE=1 SV=3	20	14.4134	7.77345		1.58592	0.427616		-0.890781		0.0055058
sp|P28571-1|SC6A9_MOUSE	Slc6a9	Isoform GlyT-1A of Sodium- and chloride-dependent glycine transporter 1 OS=Mus musculus GN=Slc6a9	4	13.6045	3.22156		1.33207	2.1927		-2.07825		0.00550705
sp|Q9QXX0|JAG1_MOUSE	Jag1	Protein jagged-1 OS=Mus musculus GN=Jag1 PE=1 SV=1	3	5.0033	23.1218		0.800003	4.4045		2.2083		0.00550829
sp|Q7TNB8-2|SBNO2_MOUSE	Sbno2	Isoform 2 of Protein strawberry notch homolog 2 OS=Mus musculus GN=Sbno2	7	15.7108	8.80482		1.09136	1.31434		-0.835394		0.00550927
sp|Q7TPR4|ACTN1_MOUSE	Actn1	Alpha-actinin-1 OS=Mus musculus GN=Actn1 PE=1 SV=1	104	8.8288	15.916		0.087065	1.74876		0.850186		0.00551044
sp|Q811J3|IREB2_MOUSE	Ireb2	Iron-responsive element-binding protein 2 OS=Mus musculus GN=Ireb2 PE=2 SV=2	3	14.4667	7.5258		0.545121	1.62579		-0.942816		0.0055135
sp|Q3V0C5-5|UBP48_MOUSE	Usp48	Isoform 5 of Ubiquitin carboxyl-terminal hydrolase 48 OS=Mus musculus GN=Usp48	9	16.6824	7.40436		1.83136	1.37786		-1.17188		0.00551389
sp|Q3TUH1|MMP37_MOUSE		MMP37-like protein, mitochondrial OS=Mus musculus PE=1 SV=2	6	15.2837	9.27631		0.677218	1.32009		-0.720368		0.00551412
sp|Q8VD65|PI3R4_MOUSE	Pik3r4	Phosphoinositide 3-kinase regulatory subunit 4 OS=Mus musculus GN=Pik3r4 PE=1 SV=3	24	10.7919	15.5073		0.417521	1.09009		0.522994		0.00551727
sp|Q9Z0P5-2|TWF2_MOUSE	Twf2	Isoform 2 of Twinfilin-2 OS=Mus musculus GN=Twf2	12	18.2213	8.53557		2.13815	1.0871		-1.09406		0.005518
sp|P62876|RPAB5_MOUSE	Polr2l	DNA-directed RNA polymerases I, II, and III subunit RPABC5 OS=Mus musculus GN=Polr2l PE=2 SV=1	2	15.6133	6.75065		1.63746	1.46103		-1.20967		0.00551868
sp|Q8K3A9|MEPCE_MOUSE	Mepce	7SK snRNA methylphosphate capping enzyme OS=Mus musculus GN=Mepce PE=1 SV=2	9	16.2189	7.78222		1.98309	0.6627		-1.05942		0.00552304
sp|Q99KS2|NGRN_MOUSE	Ngrn	Neugrin OS=Mus musculus GN=Ngrn PE=2 SV=3	1	16.5906	5.21949		2.61462	1.05093		-1.66839		0.005525
tr|E9Q2K6|E9Q2K6_MOUSE	4930422G04	Uncharacterized protein OS=Mus musculus GN=4930422G04Rik PE=4 SV=1	2	14.833	9.41699		0.935341	0.962518		-0.65547		0.005528
sp|Q9EPL2-2|CSTN1_MOUSE	Clstn1	Isoform 2 of Calsyntenin-1 OS=Mus musculus GN=Clstn1	4	16.5447	9.46226		0.43529	1.70171		-0.806115		0.00553409
sp|Q9DBH5|LMAN2_MOUSE	Lman2	Vesicular integral-membrane protein VIP36 OS=Mus musculus GN=Lman2 PE=2 SV=2	27	10.1394	17.715		1.17046	1.47153		0.805006		0.00554306
sp|Q5DTW7-2|CL035_MOUSE	Kiaa1551	Isoform 2 of Uncharacterized protein C12orf35 homolog OS=Mus musculus GN=Kiaa1551	1	15.8451	6.45172		1.92586	1.31351		-1.29628		0.00554418
sp|Q6P9R1|DDX51_MOUSE	Ddx51	ATP-dependent RNA helicase DDX51 OS=Mus musculus GN=Ddx51 PE=2 SV=1	11	15.1199	8.75487		1.41694	0.701632		-0.788291		0.00555742
sp|P61979-2|HNRPK_MOUSE	Hnrnpk	Isoform 2 of Heterogeneous nuclear ribonucleoprotein K OS=Mus musculus GN=Hnrnpk	55	14.8914	9.95032		0.228388	1.20636		-0.581668		0.00556021
sp|Q9D0M1|KPRA_MOUSE	Prpsap1	Phosphoribosyl pyrophosphate synthase-associated protein 1 OS=Mus musculus GN=Prpsap1 PE=1 SV=1	15	15.5018	8.7946		1.23987	1.11532		-0.817745		0.00557
sp|Q8BH66|ATLA1_MOUSE	Atl1	Atlastin-1 OS=Mus musculus GN=Atl1 PE=1 SV=1	6	8.78572	20.0785		1.26492	2.51126		1.19242		0.00559601
sp|P08003|PDIA4_MOUSE	Pdia4	Protein disulfide-isomerase A4 OS=Mus musculus GN=Pdia4 PE=1 SV=3	92	8.21076	20.9198		0.869239	3.04407		1.34928		0.00559735
sp|Q9JIX8-4|ACINU_MOUSE	Acin1	Isoform 4 of Apoptotic chromatin condensation inducer in the nucleus OS=Mus musculus GN=Acin1	39	15.225	9.35168		1.02285	1.04584		-0.703148		0.00559885
sp|Q6ZQ08-4|CNOT1_MOUSE	Cnot1	Isoform 4 of CCR4-NOT transcription complex subunit 1 OS=Mus musculus GN=Cnot1	2	14.1923	10.0326		0.726768	0.739029		-0.500411		0.00560118
sp|Q9ERD7|TBB3_MOUSE	Tubb3	Tubulin beta-3 chain OS=Mus musculus GN=Tubb3 PE=1 SV=1	3	18.0568	6.59238		2.35263	1.6256		-1.45367		0.00561549
sp|O54818|TPD53_MOUSE	Tpd52l1	Tumor protein D53 OS=Mus musculus GN=Tpd52l1 PE=2 SV=1	1	22.8547	4.53761		4.20951	1.77836		-2.33248		0.00561589
sp|Q8BUI3|LRWD1_MOUSE	LRWD1	Leucine-rich repeat and WD repeat-containing protein 1 OS=Mus musculus GN=LRWD1 PE=2 SV=1	5	15.8254	6.09221		2.26875	0.863937		-1.37721		0.00561804
sp|Q922Q9-2|CHID1_MOUSE	Chid1	Isoform 2 of Chitinase domain-containing protein 1 OS=Mus musculus GN=Chid1	7	7.352	19.7494		0.898925	2.96076		1.4256		0.00562124
sp|Q9CWW6|PIN4_MOUSE	Pin4	Peptidyl-prolyl cis-trans isomerase NIMA-interacting 4 OS=Mus musculus GN=Pin4 PE=2 SV=1	7	16.7945	8.0086		2.18388	0.205835		-1.06837		0.00562125
sp|Q924W7-2|ST5_MOUSE	St5	Isoform 2 of Suppression of tumorigenicity 5 protein OS=Mus musculus GN=St5	3	18.7781	6.48065		2.76397	1.33622		-1.53484		0.00562295
sp|P35550|FBRL_MOUSE	Fbl	rRNA 2'-O-methyltransferase fibrillarin OS=Mus musculus GN=Fbl PE=1 SV=2	25	13.7288	9.72843		0.763017	0.646596		-0.496924		0.0056259
tr|E9PV38|E9PV38_MOUSE	Ces2g	Uncharacterized protein OS=Mus musculus GN=Ces2g PE=4 SV=1	7	4.94495	27.4232		2.69351	4.9314		2.47137		0.0056263
sp|Q9Z2I9|SUCB1_MOUSE	Sucla2	Succinyl-CoA ligase [ADP-forming] subunit beta, mitochondrial OS=Mus musculus GN=Sucla2 PE=1 SV=2	33	10.3764	16.0786		1.38748	0.324198		0.631835		0.00562844
sp|Q61142-2|SPIN1_MOUSE	Spin1	Isoform 2 of Spindlin-1 OS=Mus musculus GN=Spin1	3	17.2428	9.27168		1.37912	1.43805		-0.895089		0.00562859
sp|Q9D2E2|TOE1_MOUSE	Toe1	Target of EGR1 protein 1 OS=Mus musculus GN=Toe1 PE=2 SV=1	5	17.4552	7.78705		2.01417	1.33477		-1.16451		0.00562878
sp|P25085-2|IL1RA_MOUSE	Il1rn	Isoform 2 of Interleukin-1 receptor antagonist protein OS=Mus musculus GN=Il1rn	11	1.74117	29.6636		0.278927	6.97125		4.09056		0.00563081
sp|B2RXR6|ANR44_MOUSE	Ankrd44	Serine/threonine-protein phosphatase 6 regulatory ankyrin repeat subunit B OS=Mus musculus GN=Ankrd44 PE=2 SV=1	5	10.3508	17.1121		1.02892	1.33989		0.72528		0.00563371
sp|A6H630|CF211_MOUSE		UPF0364 protein C6orf211 homolog OS=Mus musculus PE=2 SV=1	7	14.1078	11.1744		0.490984	0.546965		-0.336299		0.00566517
sp|P97306|STAC_MOUSE	Stac	SH3 and cysteine-rich domain-containing protein OS=Mus musculus GN=Stac PE=2 SV=1	1	15.4634	2.20808		3.09493	1.20366		-2.80799		0.0056653
sp|Q8VCX6|KPTN_MOUSE	Kptn	Kaptin OS=Mus musculus GN=Kptn PE=2 SV=1	1	7.13822	14.1567		0.928676	1.49561		0.987851		0.0056741
sp|Q8K296-2|MTMR3_MOUSE	Mtmr3	Isoform 2 of Myotubularin-related protein 3 OS=Mus musculus GN=Mtmr3	7	10.2323	14.9978		0.747131	0.932644		0.551626		0.00567476
sp|Q8C0V9-2|FRMD6_MOUSE	Frmd6	Isoform 2 of FERM domain-containing protein 6 OS=Mus musculus GN=Frmd6	5	7.68374	18.3093		1.08599	2.4336		1.2527		0.00567488
sp|Q9D8T2|GSDMD_MOUSE	Gsdmdc1	Gasdermin-D OS=Mus musculus GN=Gsdmdc1 PE=2 SV=1	1	18.3793	9.39178		1.54085	1.64434		-0.968613		0.00567598
sp|Q99KE1|MAOM_MOUSE	Me2	NAD-dependent malic enzyme, mitochondrial OS=Mus musculus GN=Me2 PE=2 SV=1	19	11.5991	8.82263		0.106311	0.688996		-0.394737		0.00569224
sp|Q7TMF3|NDUAC_MOUSE	Ndufa12	NADH dehydrogenase [ubiquinone] 1 alpha subcomplex subunit 12 OS=Mus musculus GN=Ndufa12 PE=1 SV=2	12	7.98131	16.6321		1.49466	1.57794		1.05927		0.00569833
tr|E9Q6A7|E9Q6A7_MOUSE	Bptf	Uncharacterized protein OS=Mus musculus GN=Bptf PE=4 SV=1	1	14.9023	9.29443		0.999041	0.99318		-0.681097		0.00569848
tr|F6PXL5|F6PXL5_MOUSE	Nup205	Uncharacterized protein (Fragment) OS=Mus musculus GN=Nup205 PE=4 SV=1	49	14.0131	9.49362		1.08853	0.324446		-0.561742		0.00570181
sp|Q9D0F3|LMAN1_MOUSE	Lman1	Protein ERGIC-53 OS=Mus musculus GN=Lman1 PE=2 SV=1	32	8.54744	15.4672		0.695544	1.59456		0.85565		0.00570482
sp|Q69ZF7|CNNM4_MOUSE	Cnnm4	Metal transporter CNNM4 OS=Mus musculus GN=Cnnm4 PE=1 SV=2	5	14.5432	9.16641		1.16036	0.695326		-0.665912		0.00571735
sp|P04117|FABP4_MOUSE	Fabp4	Fatty acid-binding protein, adipocyte OS=Mus musculus GN=Fabp4 PE=1 SV=3	14	4.74971	26.6478		0.769544	5.46005		2.4881		0.00572831
sp|Q9CRC9-2|GNPI2_MOUSE	Gnpda2	Isoform 2 of Glucosamine-6-phosphate isomerase 2 OS=Mus musculus GN=Gnpda2	7	9.64921	18.79		0.884933	2.1246		0.961482		0.0057304
sp|Q8VDK1-2|NIT1_MOUSE	Nit1	Isoform 2 of Nitrilase homolog 1 OS=Mus musculus GN=Nit1	5	7.59491	19.4715		0.512939	2.94708		1.35826		0.00573067
sp|Q810V0|MPP10_MOUSE	Mphosph10	U3 small nucleolar ribonucleoprotein protein MPP10 OS=Mus musculus GN=Mphosph10 PE=1 SV=2	18	14.4308	7.73717		0.964083	1.38398		-0.899277		0.00573626
sp|Q8CGF1|RHG29_MOUSE	Arhgap29	Rho GTPase-activating protein 29 OS=Mus musculus GN=Arhgap29 PE=1 SV=1	7	8.44391	17.253		1.37337	1.74656		1.03086		0.0057534
sp|Q8BKF1|RPOM_MOUSE	Polrmt	DNA-directed RNA polymerase, mitochondrial OS=Mus musculus GN=Polrmt PE=2 SV=1	3	17.1904	6.95925		2.5483	0.426274		-1.3046		0.00576574
sp|Q8VBU8-2|BANP_MOUSE	Banp	Isoform 2 of Protein BANP OS=Mus musculus GN=Banp	2	16.5241	7.80822		1.49712	1.61306		-1.0815		0.00576658
sp|Q8BW72|KDM4A_MOUSE	Kdm4a	Lysine-specific demethylase 4A OS=Mus musculus GN=Kdm4a PE=1 SV=3	7	16.5702	7.22206		1.45478	1.85784		-1.19811		0.00576678
sp|P45377|ALD2_MOUSE	Akr1b8	Aldose reductase-related protein 2 OS=Mus musculus GN=Akr1b8 PE=1 SV=2	17	16.4246	7.8678		0.211014	2.14998		-1.06183		0.00576717
sp|Q9EQM6|DGCR8_MOUSE	Dgcr8	Microprocessor complex subunit DGCR8 OS=Mus musculus GN=Dgcr8 PE=2 SV=2	10	16.5973	8.96256		1.89772	0.34337		-0.888969		0.00576794
sp|Q80X32|CE024_MOUSE		UPF0461 protein C5orf24 homolog OS=Mus musculus PE=1 SV=1	6	16.4744	10.6474		1.33787	0.621392		-0.629728		0.00578356
sp|P97762|RP9_MOUSE	rp9	Retinitis pigmentosa 9 protein homolog OS=Mus musculus GN=rp9 PE=1 SV=1	2	17.6424	8.38705		1.7197	1.58764		-1.07281		0.00578509
tr|Q8BWE1|Q8BWE1_MOUSE	1810024B03	Novel protein OS=Mus musculus GN=1810024B03Rik PE=2 SV=1	2	15.7673	8.26678		0.773651	1.73354		-0.931542		0.00578545
sp|P68433|H31_MOUSE	Hist1h3a	Histone H3.1 OS=Mus musculus GN=Hist1h3a PE=1 SV=2	50	17.2165	6.6493		2.18322	1.54565		-1.37252		0.00578575
sp|Q7TSZ8|NACC1_MOUSE	Nacc1	Nucleus accumbens-associated protein 1 OS=Mus musculus GN=Nacc1 PE=2 SV=1	4	16.9142	8.31252		1.69336	1.36607		-1.02487		0.00578635
sp|Q91ZA3|PCCA_MOUSE	Pcca	Propionyl-CoA carboxylase alpha chain, mitochondrial OS=Mus musculus GN=Pcca PE=2 SV=2	30	6.02755	19.9651		0.932209	3.3988		1.72784		0.00578714
sp|Q8BH60-2|GOPC_MOUSE	Gopc	Isoform 2 of Golgi-associated PDZ and coiled-coil motif-containing protein OS=Mus musculus GN=Gopc	10	10.3004	16.1624		0.433386	1.41827		0.649934		0.00578719
sp|A2A4P0|DHX8_MOUSE	Dhx8	ATP-dependent RNA helicase DHX8 OS=Mus musculus GN=Dhx8 PE=2 SV=1	21	15.2127	9.38121		1.0143	1.07203		-0.697428		0.00578775
sp|A2AI08|TPRN_MOUSE	Tprn	Taperin OS=Mus musculus GN=Tprn PE=1 SV=1	3	15.1399	11.5522		0.107593	0.901471		-0.390185		0.00578904
sp|P84091|AP2M1_MOUSE	Ap2m1	AP-2 complex subunit mu OS=Mus musculus GN=Ap2m1 PE=1 SV=1	38	9.84796	16.3859		0.272996	1.63322		0.734558		0.00579021
sp|Q61543|GSLG1_MOUSE	Glg1	Golgi apparatus protein 1 OS=Mus musculus GN=Glg1 PE=1 SV=1	38	9.51148	18.9925		0.674082	2.30622		0.997691		0.005796
sp|Q9CWD8|NUBPL_MOUSE	Nubpl	Iron-sulfur protein NUBPL OS=Mus musculus GN=Nubpl PE=2 SV=2	4	6.74124	17.5484		1.22438	2.44949		1.38026		0.00579681
sp|Q5EBP3|ARMC5_MOUSE	Armc5	Armadillo repeat-containing protein 5 OS=Mus musculus GN=Armc5 PE=2 SV=1	1	16.5297	7.63156		1.6996	1.48454		-1.11501		0.00580481
tr|B2RXC8|B2RXC8_MOUSE	Ppp2r3a	3222402P14Rik protein OS=Mus musculus GN=Ppp2r3a PE=2 SV=1	6	17.1844	9.06788		1.73799	1.10247		-0.922259		0.0058058
sp|P57724|PCBP4_MOUSE	Pcbp4	Poly(rC)-binding protein 4 OS=Mus musculus GN=Pcbp4 PE=2 SV=1	6	16.7459	7.70557		2.23562	0.519015		-1.11983		0.00582386
sp|Q8C460-2|ERI3_MOUSE	Eri3	Isoform 2 of ERI1 exoribonuclease 3 OS=Mus musculus GN=Eri3	6	17.1101	8.76422		1.26141	1.70285		-0.965154		0.00582412
sp|Q8K003|CCD72_MOUSE	Ccdc72	Coiled-coil domain-containing protein 72 OS=Mus musculus GN=Ccdc72 PE=2 SV=1	2	16.1883	10.3823		0.701829	1.29689		-0.640821		0.0058262
sp|Q61586|GPAT1_MOUSE	Gpam	Glycerol-3-phosphate acyltransferase 1, mitochondrial OS=Mus musculus GN=Gpam PE=1 SV=2	3	9.85505	13.8493		0.778676	0.651743		0.490881		0.00583973
sp|Q8BXA7|PHLP2_MOUSE	Phlpp2	PH domain leucine-rich repeat-containing protein phosphatase 2 OS=Mus musculus GN=Phlpp2 PE=2 SV=3	1	16.2767	9.75813		1.16893	1.17444		-0.738135		0.00584122
tr|Q3TDW4|Q3TDW4_MOUSE	Cabin1	Calcineurin binding protein 1, isoform CRA_c OS=Mus musculus GN=Cabin1 PE=2 SV=1	2	16.0965	8.7341		1.75697	0.650939		-0.88202		0.00584521
sp|P58742|AAAS_MOUSE	Aaas	Aladin OS=Mus musculus GN=Aaas PE=1 SV=1	11	14.2776	6.9444		1.45883	1.16493		-1.03983		0.0058456
sp|Q6DFV1|CNDG2_MOUSE	Ncapg2	Condensin-2 complex subunit G2 OS=Mus musculus GN=Ncapg2 PE=2 SV=2	15	16.0867	8.10071		1.65311	1.18309		-0.989748		0.00584692
sp|Q9Z2G6-2|SE1L1_MOUSE	Sel1l	Isoform 2 of Protein sel-1 homolog 1 OS=Mus musculus GN=Sel1l	17	8.94585	17.8111		0.796541	2.11033		0.993489		0.00584755
sp|Q9CPR8|MAGG1_MOUSE	Ndnl2	Melanoma-associated antigen G1 OS=Mus musculus GN=Ndnl2 PE=1 SV=1	3	14.3129	8.80701		1.31942	0.469615		-0.700588		0.00584856
sp|P62806|H4_MOUSE	Hist1h4a	Histone H4 OS=Mus musculus GN=Hist1h4a PE=1 SV=2	70	20.2484	4.44647		3.89696	0.992757		-2.18707		0.0058486
sp|Q91WV0|NC2B_MOUSE	Dr1	Protein Dr1 OS=Mus musculus GN=Dr1 PE=2 SV=1	3	14.7719	10.3646		1.09822	0.231595		-0.511199		0.00584899
sp|P08207|S10AA_MOUSE	S100a10	Protein S100-A10 OS=Mus musculus GN=S100a10 PE=2 SV=2	6	17.6803	7.13348		1.99175	1.80256		-1.30947		0.00584925
sp|Q91WS0|CISD1_MOUSE	Cisd1	CDGSH iron-sulfur domain-containing protein 1 OS=Mus musculus GN=Cisd1 PE=1 SV=1	6	17.4132	6.24911		2.75434	0.693622		-1.47846		0.00584944
sp|Q9JJG9|CD014_MOUSE	MNCb-4931	Uncharacterized protein C4orf14 homolog OS=Mus musculus GN=MNCb-4931 PE=2 SV=1	11	14.1618	7.66427		1.31901	1.00057		-0.885785		0.0058506
sp|Q9CZJ2|HS12B_MOUSE	Hspa12b	Heat shock 70 kDa protein 12B OS=Mus musculus GN=Hspa12b PE=1 SV=1	6	6.59041	13.61		1.13452	1.3825		1.04622		0.00585201
tr|E9PY46|E9PY46_MOUSE	Ift140	Uncharacterized protein OS=Mus musculus GN=Ift140 PE=4 SV=1	8	9.76431	17.8506		0.446299	2.01366		0.870383		0.00586972
sp|Q9EPK8|TRPV4_MOUSE	Trpv4	Transient receptor potential cation channel subfamily V member 4 OS=Mus musculus GN=Trpv4 PE=1 SV=1	3	2.59675	29.9977		0.415435	6.97961		3.53008		0.00587545
sp|Q91YN9|BAG2_MOUSE	Bag2	BAG family molecular chaperone regulator 2 OS=Mus musculus GN=Bag2 PE=1 SV=1	5	13.9842	7.9638		1.50088	0.336046		-0.812268		0.00589764
sp|Q3TDQ1|STT3B_MOUSE	Stt3b	Dolichyl-diphosphooligosaccharide--protein glycosyltransferase subunit STT3B OS=Mus musculus GN=Stt3b PE=1 SV=2	12	11.2116	15.3162		0.783139	0.698205		0.450074		0.00590598
sp|O08665|SEM3A_MOUSE	Sema3a	Semaphorin-3A OS=Mus musculus GN=Sema3a PE=1 SV=2	7	17.3895	4.98339		2.77244	1.55456		-1.80302		0.00595419
sp|Q9D6N1|CAH13_MOUSE	Ca13	Carbonic anhydrase 13 OS=Mus musculus GN=Ca13 PE=1 SV=1	7	7.01908	20.5451		1.0911	3.29122		1.54944		0.00595916
sp|Q6ZQF7-2|JADE2_MOUSE	Phf15	Isoform 2 of Protein Jade-2 OS=Mus musculus GN=Phf15	1	16.7432	6.25945		2.28129	1.4201		-1.41947		0.00596031
tr|A8Y5P4|A8Y5P4_MOUSE	Mtap7d1	Microtubule-associated protein 7 domain containing 1 OS=Mus musculus GN=Mtap7d1 PE=4 SV=1	26	15.5278	10.7135		1.04522	0.656827		-0.535427		0.00596148
tr|Q7TMC8|Q7TMC8_MOUSE	Fuk	L-fucose kinase OS=Mus musculus GN=Fuk PE=2 SV=1	9	10.2807	15.9881		0.747767	1.25935		0.637069		0.00597174
sp|Q8BZQ7|ANC2_MOUSE	Anapc2	Anaphase-promoting complex subunit 2 OS=Mus musculus GN=Anapc2 PE=1 SV=2	16	10.9926	14.9217		0.696954	0.728513		0.440872		0.0059743
sp|Q8C163|EXOG_MOUSE	Exog	Nuclease EXOG, mitochondrial OS=Mus musculus GN=Exog PE=2 SV=1	9	17.406	7.95654		2.36227	0.560606		-1.12937		0.00597801
sp|Q80YS6|AFAP1_MOUSE	Afap1	Actin filament-associated protein 1 OS=Mus musculus GN=Afap1 PE=1 SV=1	8	10.1729	14.9169		1.06103	0.600501		0.552217		0.00597958
sp|Q9D945-2|LLPH_MOUSE	Llph	Isoform 2 of Protein LLP homolog OS=Mus musculus GN=Llph	6	14.7211	7.88527		1.62417	0.668233		-0.900653		0.00598044
sp|Q9Z1X4-3|ILF3_MOUSE	Ilf3	Isoform 3 of Interleukin enhancer-binding factor 3 OS=Mus musculus GN=Ilf3	44	14.5805	10.0889		0.659553	0.946249		-0.531269		0.00598047
tr|Q80ZX0|Q80ZX0_MOUSE	Sec24b	Sec24 related gene family, member B (S. cerevisiae) OS=Mus musculus GN=Sec24b PE=2 SV=1	17	14.6959	10.2476		0.880236	0.729818		-0.520123		0.00598122
sp|Q9D0E1-2|HNRPM_MOUSE	Hnrnpm	Isoform 2 of Heterogeneous nuclear ribonucleoprotein M OS=Mus musculus GN=Hnrnpm	110	15.2417	9.47322		0.342304	1.44119		-0.686097		0.00598334
tr|E9QAF8|E9QAF8_MOUSE	Ccnt2	Uncharacterized protein OS=Mus musculus GN=Ccnt2 PE=3 SV=1	1	14.9118	7.31381		1.93055	0.288757		-1.02776		0.00598353
sp|Q9ESN9-2|JIP3_MOUSE	Mapk8ip3	Isoform 1a of C-Jun-amino-terminal kinase-interacting protein 3 OS=Mus musculus GN=Mapk8ip3	4	17.4949	8.41393		1.57915	1.71716		-1.05608		0.00598559
sp|P51949|MAT1_MOUSE	Mnat1	CDK-activating kinase assembly factor MAT1 OS=Mus musculus GN=Mnat1 PE=2 SV=2	4	14.2612	8.47482		1.4067	0.487204		-0.750837		0.00599348
sp|Q8BYK6-3|YTHD3_MOUSE	Ythdf3	Isoform 3 of YTH domain family protein 3 OS=Mus musculus GN=Ythdf3	15	14.5923	9.37554		1.03816	0.850586		-0.638237		0.00599634
tr|E9PXF8|E9PXF8_MOUSE	Sbf2	Uncharacterized protein OS=Mus musculus GN=Sbf2 PE=4 SV=1	7	9.95912	16.279		0.725485	1.45856		0.708925		0.00602854
sp|Q3U2S4-2|OTUD5_MOUSE	Otud5	Isoform 2 of OTU domain-containing protein 5 OS=Mus musculus GN=Otud5	1	17.1684	8.20647		2.26796	0.43798		-1.06492		0.00603061
sp|Q91WK7|ANR54_MOUSE	Ankrd54	Ankyrin repeat domain-containing protein 54 OS=Mus musculus GN=Ankrd54 PE=2 SV=1	2	15.8403	7.19823		1.88566	1.1915		-1.13788		0.00604791
sp|P70671|IRF3_MOUSE	Irf3	Interferon regulatory factor 3 OS=Mus musculus GN=Irf3 PE=1 SV=1	5	9.55877	15.2633		0.505437	1.38271		0.675167		0.00604892
sp|O08663|AMPM2_MOUSE	Metap2	Methionine aminopeptidase 2 OS=Mus musculus GN=Metap2 PE=1 SV=1	17	8.87673	16.4365		1.70098	0.957304		0.888803		0.00605175
sp|Q99P58|RB27B_MOUSE	Rab27b	Ras-related protein Rab-27B OS=Mus musculus GN=Rab27b PE=1 SV=3	3	10.1418	16.4268		1.14693	1.14689		0.695746		0.00605184
sp|Q9R1K5|FZR_MOUSE	Fzr1	Fizzy-related protein homolog OS=Mus musculus GN=Fzr1 PE=1 SV=1	3	15.9814	9.15201		1.53078	0.880394		-0.804234		0.00606009
sp|Q9EQI8|RM46_MOUSE	Mrpl46	39S ribosomal protein L46, mitochondrial OS=Mus musculus GN=Mrpl46 PE=2 SV=1	7	14.1529	8.48188		1.06859	1.00486		-0.738646		0.00606015
sp|Q8R3N1|NOP14_MOUSE	Nop14	Nucleolar protein 14 OS=Mus musculus GN=Nop14 PE=1 SV=2	25	14.1247	8.07315		1.51147	0.402031		-0.807013		0.0060603
sp|P97298|PEDF_MOUSE	Serpinf1	Pigment epithelium-derived factor OS=Mus musculus GN=Serpinf1 PE=1 SV=2	13	10.5198	5.28614		1.12457	0.750893		-0.992815		0.0060604
sp|Q8BHJ5|TBL1R_MOUSE	Tbl1xr1	F-box-like/WD repeat-containing protein TBL1XR1 OS=Mus musculus GN=Tbl1xr1 PE=2 SV=1	9	15.4151	9.03897		1.14209	1.18888		-0.770117		0.00606196
tr|E9Q8V6|E9Q8V6_MOUSE	Dennd4a	Uncharacterized protein OS=Mus musculus GN=Dennd4a PE=4 SV=1	6	8.81807	15.453		0.726128	1.55337		0.809349		0.00606261
sp|O88665|BRD7_MOUSE	Brd7	Bromodomain-containing protein 7 OS=Mus musculus GN=Brd7 PE=1 SV=1	6	14.8503	7.82613		1.05093	1.48088		-0.924124		0.00606265
sp|Q62092|NSG1_MOUSE	Nsg1	Neuron-specific protein family member 1 OS=Mus musculus GN=Nsg1 PE=2 SV=3	4	2.12768	27.2621		0.373181	6.48299		3.67954		0.00606301
sp|Q5SQY2|BOD1_MOUSE	Bod1	Biorientation of chromosomes in cell division protein 1 OS=Mus musculus GN=Bod1 PE=2 SV=1	3	14.6189	9.49518		1.25547	0.424331		-0.62257		0.00606303
sp|Q8C6B9|AROS_MOUSE	Rps19bp1	Active regulator of SIRT1 OS=Mus musculus GN=Rps19bp1 PE=1 SV=1	3	15.2424	6.22526		1.52611	1.76492		-1.29188		0.00606537
sp|P18654|KS6A3_MOUSE	Rps6ka3	Ribosomal protein S6 kinase alpha-3 OS=Mus musculus GN=Rps6ka3 PE=1 SV=2	15	17.1759	7.40373		2.13866	1.35148		-1.21406		0.00606987
sp|Q8R2Y9|SOSB1_MOUSE	Obfc2b	SOSS complex subunit B1 OS=Mus musculus GN=Obfc2b PE=2 SV=1	1	16.2247	8.9596		1.69944	0.80522		-0.856682		0.00606992
sp|Q62130|PTN14_MOUSE	Ptpn14	Tyrosine-protein phosphatase non-receptor type 14 OS=Mus musculus GN=Ptpn14 PE=1 SV=1	7	11.0942	16.0225		0.505088	1.17275		0.530292		0.00607713
sp|Q9EST4-3|PSMG2_MOUSE	Psmg2	Isoform 3 of Proteasome assembly chaperone 2 OS=Mus musculus GN=Psmg2	8	12.4445	9.48424		0.427128	0.636995		-0.3919		0.00607973
sp|Q9WU28|PFD5_MOUSE	Pfdn5	Prefoldin subunit 5 OS=Mus musculus GN=Pfdn5 PE=1 SV=1	6	17.1117	7.53936		2.42077	0.545016		-1.18247		0.00608121
sp|Q8R151|ZNFX1_MOUSE	Znfx1	NFX1-type zinc finger-containing protein 1 OS=Mus musculus GN=Znfx1 PE=2 SV=3	12	9.79073	16.2902		1.41302	0.91855		0.734514		0.00608133
tr|F7BWT7|F7BWT7_MOUSE	Tspan15	Uncharacterized protein (Fragment) OS=Mus musculus GN=Tspan15 PE=4 SV=1	1	25.0497	5.76788		4.56126	2.03655		-2.11868		0.00608179
sp|Q3UHH8|GXLT1_MOUSE	Gxylt1	Glucoside xylosyltransferase 1 OS=Mus musculus GN=Gxylt1 PE=1 SV=2	5	14.9762	8.9369		1.07021	1.14244		-0.744823		0.0060833
sp|Q75NR7-2|RECQ4_MOUSE	Recql4	Isoform 2 of ATP-dependent DNA helicase Q4 OS=Mus musculus GN=Recql4	2	15.6857	5.48206		2.62117	0.36038		-1.51666		0.00608466
sp|P28033|CEBPB_MOUSE	Cebpb	CCAAT/enhancer-binding protein beta OS=Mus musculus GN=Cebpb PE=1 SV=1	3	17.0135	4.38681		3.03869	1.22259		-1.95543		0.00608649
sp|Q99PV0|PRP8_MOUSE	Prpf8	Pre-mRNA-processing-splicing factor 8 OS=Mus musculus GN=Prpf8 PE=1 SV=2	108	14.481	9.69181		0.468893	1.15068		-0.57932		0.00608694
sp|Q64012-2|RALY_MOUSE	Raly	Isoform 1 of RNA-binding protein Raly OS=Mus musculus GN=Raly	26	15.1566	8.58272		0.50704	1.62891		-0.820443		0.00608858
sp|Q76N33|STALP_MOUSE	Stambpl1	AMSH-like protease OS=Mus musculus GN=Stambpl1 PE=2 SV=1	4	13.7538	8.88502		0.665405	1.07483		-0.63038		0.00609653
sp|O89026|ROBO1_MOUSE	Robo1	Roundabout homolog 1 OS=Mus musculus GN=Robo1 PE=1 SV=1	3	11.2808	18.6616		1.00288	1.63367		0.726206		0.00609967
tr|F6S062|F6S062_MOUSE	Chka	Uncharacterized protein (Fragment) OS=Mus musculus GN=Chka PE=4 SV=1	1	17.1546	6.20296		2.625	1.09694		-1.46756		0.00610128
sp|Q6ZQF0|TOPB1_MOUSE	Topbp1	DNA topoisomerase 2-binding protein 1 OS=Mus musculus GN=Topbp1 PE=1 SV=2	26	16.4145	8.45174		1.66318	1.23181		-0.95765		0.00611011
sp|Q9Z0U1|ZO2_MOUSE	Tjp2	Tight junction protein ZO-2 OS=Mus musculus GN=Tjp2 PE=1 SV=2	23	18.1717	10.3012		1.11027	1.71877		-0.818887		0.00611196
sp|Q60996-2|2A5G_MOUSE	Ppp2r5c	Isoform 1 of Serine/threonine-protein phosphatase 2A 56 kDa regulatory subunit gamma isoform OS=Mus musculus GN=Ppp2r5c	15	15.3148	9.41269		0.841589	1.2851		-0.70225		0.00613018
sp|Q9QZM4|TR10B_MOUSE	Tnfrsf10b	Tumor necrosis factor receptor superfamily member 10B OS=Mus musculus GN=Tnfrsf10b PE=1 SV=3	4	6.06811	19.0332		0.527401	3.33272		1.6492		0.00613214
tr|E9QN31|E9QN31_MOUSE	Nop2	Uncharacterized protein OS=Mus musculus GN=Nop2 PE=4 SV=1	31	14.8172	6.99349		1.46622	1.41533		-1.08319		0.00614452
sp|Q8K215|LYRM4_MOUSE	Lyrm4	LYR motif-containing protein 4 OS=Mus musculus GN=Lyrm4 PE=2 SV=1	2	16.7149	7.00777		2.32798	0.9888		-1.25411		0.00614476
sp|Q9CWS1|RN135_MOUSE	Rnf135	E3 ubiquitin-protein ligase RNF135 OS=Mus musculus GN=Rnf135 PE=2 SV=1	2	7.1655	20.6809		0.789658	3.43161		1.52916		0.00614678
sp|Q6PAL7|AHDC1_MOUSE	Ahdc1	AT-hook DNA-binding motif-containing protein 1 OS=Mus musculus GN=Ahdc1 PE=1 SV=1	5	17.9064	6.92848		2.71372	0.910056		-1.36987		0.00615604
sp|Q8BGA2|LHPL2_MOUSE	Lhfpl2	Lipoma HMGIC fusion partner-like 2 protein OS=Mus musculus GN=Lhfpl2 PE=2 SV=1	1	14.351	4.64267		2.5257	0.193233		-1.62813		0.0061692
sp|Q99MS8|TPGS1_MOUSE	Gm16517	Tubulin polyglutamylase complex subunit 1 OS=Mus musculus GN=Gm16517 PE=1 SV=1	2	14.647	9.44307		1.29958	0.395471		-0.633274		0.00616924
tr|D3Z1P1|D3Z1P1_MOUSE	Mex3a	Uncharacterized protein OS=Mus musculus GN=Mex3a PE=4 SV=1	5	21.3146	4.38222		4.12957	1.57519		-2.28211		0.00617166
sp|Q6P2L6|NSD3_MOUSE	Whsc1l1	Histone-lysine N-methyltransferase NSD3 OS=Mus musculus GN=Whsc1l1 PE=1 SV=2	5	16.4182	9.61656		1.37013	1.1289		-0.771703		0.00617376
sp|P09025|HXC8_MOUSE	Hoxc8	Homeobox protein Hox-C8 OS=Mus musculus GN=Hoxc8 PE=1 SV=2	2	12.1848	3.15127		2.12629	1.02345		-1.95108		0.00618193
tr|E9QKL0|E9QKL0_MOUSE	Rad54l2	Uncharacterized protein OS=Mus musculus GN=Rad54l2 PE=4 SV=1	2	16.9125	7.95965		0.0954811	2.33906		-1.08732		0.00619742
sp|Q3UFB2|BCD1_MOUSE	Znhit6	Box C/D snoRNA protein 1 OS=Mus musculus GN=Znhit6 PE=2 SV=2	14	13.6579	6.12329		1.8911	0.55359		-1.15735		0.00619744
sp|Q64323|PIGA_MOUSE	Piga	N-acetylglucosaminyl-phosphatidylinositol biosynthetic protein OS=Mus musculus GN=Piga PE=2 SV=1	1	15.0089	8.94223		0.674906	1.43542		-0.747112		0.00619877
tr|Q3UII8|Q3UII8_MOUSE	Mta3	Uncharacterized protein OS=Mus musculus GN=Mta3 PE=2 SV=1	8	16.0809	9.41162		1.47073	0.939096		-0.772837		0.00620451
sp|O08912|GALT1_MOUSE	Galnt1	Polypeptide N-acetylgalactosaminyltransferase 1 OS=Mus musculus GN=Galnt1 PE=1 SV=1	7	7.59891	14.7758		1.00113	1.5895		0.959372		0.00620978
sp|Q9CWZ3-2|RBM8A_MOUSE	Rbm8a	Isoform 2 of RNA-binding protein 8A OS=Mus musculus GN=Rbm8a	8	16.0738	8.916		1.38669	1.26351		-0.85024		0.00621913
sp|P58929|GMEB2_MOUSE	Gmeb2	Glucocorticoid modulatory element-binding protein 2 OS=Mus musculus GN=Gmeb2 PE=2 SV=2	4	16.6823	8.69515		1.88039	0.918667		-0.940036		0.00622
sp|Q8QZY9|SF3B4_MOUSE	Sf3b4	Splicing factor 3B subunit 4 OS=Mus musculus GN=Sf3b4 PE=2 SV=1	2	16.6594	7.55984		2.09835	1.12996		-1.13991		0.0062208
sp|Q99KP6|PRP19_MOUSE	Prpf19	Pre-mRNA-processing factor 19 OS=Mus musculus GN=Prpf19 PE=2 SV=1	35	14.8336	9.87656		0.72665	1.07687		-0.586792		0.00622082
sp|Q8K0F1|TBC23_MOUSE	Tbc1d23	TBC1 domain family member 23 OS=Mus musculus GN=Tbc1d23 PE=2 SV=1	5	9.15471	15.6998		1.30287	1.11657		0.77816		0.00622163
sp|Q3UI43|BABA1_MOUSE	Babam1	BRISC and BRCA1-A complex member 1 OS=Mus musculus GN=Babam1 PE=2 SV=1	6	10.4544	17.3597		1.61593	0.813686		0.731626		0.00622239
sp|Q80YR4-2|ZN598_MOUSE	Znf598	Isoform 2 of Zinc finger protein 598 OS=Mus musculus GN=Znf598	7	13.5163	9.9485		0.527011	0.771988		-0.442149		0.00622429
sp|Q60864|STIP1_MOUSE	Stip1	Stress-induced-phosphoprotein 1 OS=Mus musculus GN=Stip1 PE=1 SV=1	87	16.0753	8.95613		1.29135	1.34846		-0.843901		0.0062266
sp|Q9JKB3-2|DBPA_MOUSE	Csda	Isoform 2 of DNA-binding protein A OS=Mus musculus GN=Csda	13	13.1033	9.19731		1.02116	0.0898809		-0.510651		0.00623569
sp|Q923Z0|GPC5B_MOUSE	Gprc5b	G-protein coupled receptor family C group 5 member B OS=Mus musculus GN=Gprc5b PE=2 SV=1	2	8.31698	18.5277		0.762739	2.56885		1.15555		0.00623913
sp|Q9Z0R6|ITSN2_MOUSE	Itsn2	Intersectin-2 OS=Mus musculus GN=Itsn2 PE=1 SV=2	18	9.42828	15.6166		0.875633	1.36985		0.728017		0.00625657
sp|Q99KS6-2|ADPRM_MOUSE		Isoform 2 of Manganese-dependent ADP-ribose/CDP-alcohol diphosphatase OS=Mus musculus	1	8.47406	18.8559		0.389769	2.70174		1.15389		0.00626112
sp|Q9CQ33-2|LZTR1_MOUSE	Lztr1	Isoform 2 of Leucine-zipper-like transcriptional regulator 1 OS=Mus musculus GN=Lztr1	6	11.9676	13.5994		0.0548361	0.425358		0.184405		0.00626293
sp|Q9DCG9|TR112_MOUSE	Trmt112	tRNA methyltransferase 112 homolog OS=Mus musculus GN=Trmt112 PE=2 SV=1	5	17.3839	6.57946		2.49245	1.3645		-1.40171		0.0062631
sp|P49452|CENPC_MOUSE	Cenpc1	Centromere protein C 1 OS=Mus musculus GN=Cenpc1 PE=1 SV=2	11	17.6695	8.69594		1.31963	1.95529		-1.02285		0.00626328
sp|Q9QZ73|DCNL1_MOUSE	Dcun1d1	DCN1-like protein 1 OS=Mus musculus GN=Dcun1d1 PE=2 SV=1	8	15.6261	9.62796		0.895592	1.29812		-0.698656		0.00626452
sp|Q6PIJ4|NFRKB_MOUSE	Nfrkb	Nuclear factor related to kappa-B-binding protein OS=Mus musculus GN=Nfrkb PE=2 SV=1	8	15.941	9.14117		0.721858	1.63824		-0.802288		0.00627379
sp|Q9Z1E4|GYS1_MOUSE	Gys1	Glycogen [starch] synthase, muscle OS=Mus musculus GN=Gys1 PE=1 SV=2	14	7.14935	12.5589		0.986311	1.02657		0.812829		0.00627452
sp|Q3UUQ7|PGAP1_MOUSE	Pgap1	GPI inositol-deacylase OS=Mus musculus GN=Pgap1 PE=1 SV=3	5	8.71708	14.7718		0.956931	1.27473		0.760932		0.00627544
sp|B1AQJ2|UBP36_MOUSE	Usp36	Ubiquitin carboxyl-terminal hydrolase 36 OS=Mus musculus GN=Usp36 PE=2 SV=1	10	15.7156	6.01569		2.29696	1.11507		-1.38539		0.00627695
sp|Q9QXK2|RAD18_MOUSE	Rad18	E3 ubiquitin-protein ligase RAD18 OS=Mus musculus GN=Rad18 PE=1 SV=2	8	15.9844	7.12329		1.94429	1.29214		-1.16605		0.00628235
sp|A2APV2-2|FMNL2_MOUSE	Fmnl2	Isoform 2 of Formin-like protein 2 OS=Mus musculus GN=Fmnl2	10	15.8425	6.63883		2.18265	1.05542		-1.2548		0.00628302
sp|Q08288|LYAR_MOUSE	Lyar	Cell growth-regulating nucleolar protein OS=Mus musculus GN=Lyar PE=1 SV=2	17	14.9821	5.95676		1.25335	2.02496		-1.33064		0.00631142
sp|Q9DCT6-3|BAP18_MOUSE	Bap18	Isoform 3 of Chromatin complexes subunit BAP18 OS=Mus musculus GN=Bap18	2	15.3943	9.65697		1.29647	0.78119		-0.672751		0.00631163
tr|Q5SXC3|Q5SXC3_MOUSE	Vezf1	Uncharacterized protein (Fragment) OS=Mus musculus GN=Vezf1 PE=2 SV=1	1	17.8572	7.74344		2.24273	1.44831		-1.20546		0.0063174
tr|Q9DC07|Q9DC07_MOUSE	Nebl	Nebulette OS=Mus musculus GN=Nebl PE=2 SV=1	1	8.42407	23.749		2.05433	3.48607		1.49528		0.0063197
sp|Q9WUR9|KAD4_MOUSE	Ak4	Adenylate kinase isoenzyme 4, mitochondrial OS=Mus musculus GN=Ak4 PE=2 SV=1	4	17.5075	2.60937		3.92543	0.281552		-2.7462		0.00632723
sp|Q9D3B1|HACD2_MOUSE	Ptplb	3-hydroxyacyl-CoA dehydratase 2 OS=Mus musculus GN=Ptplb PE=2 SV=1	3	19.1075	8.39602		1.33994	2.4934		-1.18636		0.00632902
tr|E9Q616|E9Q616_MOUSE	Ahnak	Uncharacterized protein OS=Mus musculus GN=Ahnak PE=4 SV=1	952	8.00745	19.0725		0.28465	2.91065		1.25208		0.00632915
sp|Q8BSQ9-2|PB1_MOUSE	Pbrm1	Isoform 2 of Protein polybromo-1 OS=Mus musculus GN=Pbrm1	32	14.4941	8.46022		1.23552	1.00882		-0.776698		0.00632977
tr|Q91V89|Q91V89_MOUSE	Ppp2r5d	Protein phosphatase 2, regulatory subunit B (B56), delta isoform OS=Mus musculus GN=Ppp2r5d PE=2 SV=1	15	17.7987	7.8509		2.49401	0.830693		-1.18084		0.00633147
sp|Q9D7X8|GGCT_MOUSE	Ggct	Gamma-glutamylcyclotransferase OS=Mus musculus GN=Ggct PE=2 SV=1	9	5.77901	24.2504		0.907551	4.79937		2.06911		0.00633337
sp|Q8VHR5|P66B_MOUSE	Gatad2b	Transcriptional repressor p66-beta OS=Mus musculus GN=Gatad2b PE=1 SV=1	11	16.8724	6.59512		2.02452	1.81669		-1.35519		0.00633691
sp|P30280|CCND2_MOUSE	Ccnd2	G1/S-specific cyclin-D2 OS=Mus musculus GN=Ccnd2 PE=2 SV=1	3	5.88532	16.7395		0.409449	2.84339		1.50806		0.00633975
sp|Q9WU42|NCOR2_MOUSE	Ncor2	Nuclear receptor corepressor 2 OS=Mus musculus GN=Ncor2 PE=1 SV=3	30	14.8872	8.76839		0.781307	1.41918		-0.763688		0.00634139
sp|Q9DA77|CM016_MOUSE		Uncharacterized protein C13orf16 homolog OS=Mus musculus PE=2 SV=1	1	8.81223	14.1948		1.27711	0.631038		0.68778		0.00634234
sp|Q5DTM8|BRE1A_MOUSE	Rnf20	E3 ubiquitin-protein ligase BRE1A OS=Mus musculus GN=Rnf20 PE=1 SV=2	16	14.8587	9.15472		0.800073	1.27986		-0.698716		0.00634262
sp|Q9DCS3|MECR_MOUSE	Mecr	Trans-2-enoyl-CoA reductase, mitochondrial OS=Mus musculus GN=Mecr PE=2 SV=2	4	17.0003	8.02045		2.0648	1.18055		-1.0838		0.0063435
sp|A2ADY9|DDI2_MOUSE	Ddi2	Protein DDI1 homolog 2 OS=Mus musculus GN=Ddi2 PE=1 SV=1	11	15.6019	9.71217		0.915587	1.2628		-0.683859		0.00634383
sp|Q8BFV2|PCID2_MOUSE	Pcid2	PCI domain-containing protein 2 OS=Mus musculus GN=Pcid2 PE=2 SV=1	8	15.738	8.41643		1.58999	1.10689		-0.902975		0.00634526
sp|Q9DAP7|ASF1B_MOUSE	Asf1b	Histone chaperone ASF1B OS=Mus musculus GN=Asf1b PE=1 SV=1	2	17.0469	9.60915		1.19187	1.57047		-0.827029		0.00635797
sp|Q99L90|MCRS1_MOUSE	Mcrs1	Microspherule protein 1 OS=Mus musculus GN=Mcrs1 PE=1 SV=1	2	15.157	8.39061		1.16656	1.3643		-0.853134		0.00637385
sp|P63037|DNJA1_MOUSE	Dnaja1	DnaJ homolog subfamily A member 1 OS=Mus musculus GN=Dnaja1 PE=1 SV=1	20	14.7409	10.1028		0.634831	1.05518		-0.545061		0.00638958
tr|E9Q8X5|E9Q8X5_MOUSE	Zbtb10	Uncharacterized protein OS=Mus musculus GN=Zbtb10 PE=4 SV=1	1	16.8047	7.80776		1.53599	1.83109		-1.10589		0.00639494
sp|Q8BVA4|LMOD1_MOUSE	Lmod1	Leiomodin-1 OS=Mus musculus GN=Lmod1 PE=2 SV=1	9	9.4281	3.33861		1.57496	0.370696		-1.49772		0.00639651
sp|P70265|F262_MOUSE	Pfkfb2	6-phosphofructo-2-kinase/fructose-2,6-biphosphatase 2 OS=Mus musculus GN=Pfkfb2 PE=1 SV=2	10	7.71573	20.8722		0.51116	3.45725		1.43571		0.00639762
sp|P50247|SAHH_MOUSE	Ahcy	Adenosylhomocysteinase OS=Mus musculus GN=Ahcy PE=1 SV=3	41	14.1628	9.08004		0.952953	0.959443		-0.641336		0.0064204
sp|Q9D0F6|RFC5_MOUSE	Rfc5	Replication factor C subunit 5 OS=Mus musculus GN=Rfc5 PE=2 SV=1	15	16.7088	5.87336		2.06971	2.00632		-1.50835		0.00642193
sp|Q08091|CNN1_MOUSE	Cnn1	Calponin-1 OS=Mus musculus GN=Cnn1 PE=2 SV=1	17	14.2523	1.22232		3.46813	0.0578193		-3.5435		0.00643033
sp|P97868|RBBP6_MOUSE	Rbbp6	E3 ubiquitin-protein ligase RBBP6 OS=Mus musculus GN=Rbbp6 PE=1 SV=5	21	15.5474	9.53184		0.260614	1.58071		-0.705847		0.00643706
sp|Q8C3P7|MTA70_MOUSE	Mettl3	N6-adenosine-methyltransferase 70 kDa subunit OS=Mus musculus GN=Mettl3 PE=2 SV=2	5	14.0596	10.4818		0.0630829	0.951102		-0.42366		0.00643939
sp|P28271|ACOC_MOUSE	Aco1	Cytoplasmic aconitate hydratase OS=Mus musculus GN=Aco1 PE=1 SV=3	26	15.0952	8.07363		1.52334	1.08563		-0.902803		0.00644152
sp|Q9CZ62|CEP97_MOUSE	Cep97	Centrosomal protein of 97 kDa OS=Mus musculus GN=Cep97 PE=2 SV=1	4	9.58779	18.2001		1.27411	1.90959		0.924678		0.00644712
sp|Q60854|SPB6_MOUSE	Serpinb6	Serpin B6 OS=Mus musculus GN=Serpinb6 PE=2 SV=1	42	9.70896	18.1531		1.3488	1.80296		0.902824		0.00645282
sp|Q80W22|THNS2_MOUSE	Thnsl2	Threonine synthase-like 2 OS=Mus musculus GN=Thnsl2 PE=2 SV=1	2	6.97385	21.7698		0.68694	3.88583		1.6423		0.00645338
sp|O35671|ITBP1_MOUSE	Itgb1bp1	Integrin beta-1-binding protein 1 OS=Mus musculus GN=Itgb1bp1 PE=2 SV=1	4	10.2849	15.1544		0.617247	1.14453		0.559203		0.00647355
sp|P24369|PPIB_MOUSE	Ppib	Peptidyl-prolyl cis-trans isomerase B OS=Mus musculus GN=Ppib PE=2 SV=2	44	10.4151	17.8017		1.83833	0.713675		0.77334		0.00647392
sp|Q99L85|DERP6_MOUSE	Derp6	Dermal papilla-derived protein 6 homolog OS=Mus musculus GN=Derp6 PE=2 SV=1	2	13.4403	9.62143		0.475583	0.902091		-0.482246		0.00647612
sp|Q62418-2|DBNL_MOUSE	Dbnl	Isoform 2 of Drebrin-like protein OS=Mus musculus GN=Dbnl	16	9.62127	16.8389		0.586305	1.8418		0.807502		0.00653769
sp|Q80VJ3|RCL_MOUSE	Rcl	Deoxyribonucleoside 5'-monophosphate N-glycosidase OS=Mus musculus GN=Rcl PE=2 SV=2	2	20.5829	6.10579		3.79648	0.798336		-1.75319		0.00655029
sp|Q91WE4|CR032_MOUSE		UPF0729 protein C18orf32 homolog OS=Mus musculus PE=2 SV=1	1	6.76975	20.2672		0.695209	3.5516		1.58197		0.00656012
sp|Q9DBF7-3|CWC25_MOUSE	Cwc25	Isoform 3 of Pre-mRNA-splicing factor CWC25 homolog OS=Mus musculus GN=Cwc25	3	15.6184	8.89524		0.110569	1.79979		-0.812139		0.0065638
tr|E9Q624|E9Q624_MOUSE	Zfp644	Uncharacterized protein OS=Mus musculus GN=Zfp644 PE=4 SV=1	7	16.1406	9.93557		1.27557	1.06936		-0.700017		0.00656453
sp|O70228|ATP9A_MOUSE	Atp9a	Probable phospholipid-transporting ATPase IIA OS=Mus musculus GN=Atp9a PE=2 SV=3	5	2.8773	28.4616		1.00628	6.79122		3.30623		0.00656891
sp|Q9CRD2|TTC35_MOUSE	Ttc35	Tetratricopeptide repeat protein 35 OS=Mus musculus GN=Ttc35 PE=2 SV=1	9	14.3533	9.98329		0.507742	1.05773		-0.523792		0.00657838
sp|Q8K1M6-3|DNM1L_MOUSE	Dnm1l	Isoform 3 of Dynamin-1-like protein OS=Mus musculus GN=Dnm1l	33	9.92696	15.5404		0.733451	1.31806		0.646597		0.00659509
sp|Q6P073|UB2J2_MOUSE	Ube2j2	Ubiquitin-conjugating enzyme E2 J2 OS=Mus musculus GN=Ube2j2 PE=1 SV=1	3	16.0866	7.40982		2.23948	0.655948		-1.11835		0.00661264
tr|E9Q1K3|E9Q1K3_MOUSE	Add1	Uncharacterized protein OS=Mus musculus GN=Add1 PE=4 SV=1	1	6.12178	22.6942		1.62541	4.1524		1.8903		0.0066207
sp|Q9CR59|G45IP_MOUSE	Gadd45gip1	Growth arrest and DNA damage-inducible proteins-interacting protein 1 OS=Mus musculus GN=Gadd45gip1 PE=2 SV=1	4	13.6695	10.8601		0.706695	0.269843		-0.331922		0.00663045
sp|Q61191|HCFC1_MOUSE	Hcfc1	Host cell factor 1 OS=Mus musculus GN=Hcfc1 PE=1 SV=2	38	16.5105	8.74793		1.80666	1.05106		-0.916373		0.00663401
sp|Q9ES46|PARVB_MOUSE	Parvb	Beta-parvin OS=Mus musculus GN=Parvb PE=1 SV=1	5	17.1748	4.20109		3.4409	0.610863		-2.03146		0.00663656
sp|Q9QXN3-2|TRIP4_MOUSE	Trip4	Isoform 2 of Activating signal cointegrator 1 OS=Mus musculus GN=Trip4	12	11.1685	13.8089		0.314642	0.637969		0.306159		0.0066367
sp|Q8BFX1|RN187_MOUSE	Rnf187	E3 ubiquitin-protein ligase RNF187 OS=Mus musculus GN=Rnf187 PE=1 SV=2	1	15.0985	9.17467		1.458	0.653115		-0.718674		0.00665876
sp|P70353|NFYC_MOUSE	Nfyc	Nuclear transcription factor Y subunit gamma OS=Mus musculus GN=Nfyc PE=2 SV=2	4	17.1882	8.07262		2.41979	0.437041		-1.09031		0.00666044
sp|O70458-2|OSMR_MOUSE	Osmr	Isoform 2 of Oncostatin-M-specific receptor subunit beta OS=Mus musculus GN=Osmr	20	8.70824	17.0847		0.704986	2.14879		0.972248		0.00667424
sp|Q8VEG6-2|CNO6L_MOUSE	Cnot6l	Isoform 2 of CCR4-NOT transcription complex subunit 6-like OS=Mus musculus GN=Cnot6l	3	13.9224	11.1728		0.655459	0.348292		-0.317414		0.00667519
sp|Q61151|2A5E_MOUSE	Ppp2r5e	Serine/threonine-protein phosphatase 2A 56 kDa regulatory subunit epsilon isoform OS=Mus musculus GN=Ppp2r5e PE=2 SV=3	5	10.373	14.2535		0.713129	0.768536		0.458475		0.00668904
sp|P35235|PTN11_MOUSE	Ptpn11	Tyrosine-protein phosphatase non-receptor type 11 OS=Mus musculus GN=Ptpn11 PE=1 SV=2	1	10.9214	16.0454		0.996467	0.961489		0.554996		0.00669075
sp|P56546-2|CTBP2_MOUSE	Ctbp2	Isoform 2 of C-terminal-binding protein 2 OS=Mus musculus GN=Ctbp2	8	14.2039	9.42495		0.29996	1.25753		-0.591733		0.00669772
sp|O08550|MLL4_MOUSE	Wbp7	Histone-lysine N-methyltransferase MLL4 OS=Mus musculus GN=Wbp7 PE=1 SV=3	4	15.6201	8.43136		1.91793	0.321433		-0.889567		0.0067012
sp|P10148|CCL2_MOUSE	Ccl2	C-C motif chemokine 2 OS=Mus musculus GN=Ccl2 PE=1 SV=1	2	23.9748	0.738721		6.28377	0.136467		-5.02034		0.00670294
sp|Q8CIC2|NUPL2_MOUSE	Nupl2	Nucleoporin-like protein 2 OS=Mus musculus GN=Nupl2 PE=2 SV=1	4	14.7567	9.46606		1.31954	0.555566		-0.640531		0.00670298
sp|Q9DD18-2|DTD1_MOUSE	Dtd1	Isoform 2 of D-tyrosyl-tRNA(Tyr) deacylase 1 OS=Mus musculus GN=Dtd1	2	6.23463	20.9559		0.226165	3.97451		1.74898		0.00670346
sp|P55302|AMRP_MOUSE	Lrpap1	Alpha-2-macroglobulin receptor-associated protein OS=Mus musculus GN=Lrpap1 PE=1 SV=1	24	8.14418	20.7189		0.984049	3.25826		1.3471		0.00670435
sp|Q9Z1N2|ORC1_MOUSE	Orc1	Origin recognition complex subunit 1 OS=Mus musculus GN=Orc1 PE=2 SV=2	7	17.5268	5.21945		2.66305	1.99736		-1.74759		0.00670497
sp|Q8VCS6|MED9_MOUSE	Med9	Mediator of RNA polymerase II transcription subunit 9 OS=Mus musculus GN=Med9 PE=2 SV=1	1	13.6886	8.28283		0.823992	1.21193		-0.724779		0.00673282
sp|Q8K3W3|CASC3_MOUSE	Casc3	Protein CASC3 OS=Mus musculus GN=Casc3 PE=1 SV=3	3	13.7665	10.0758		0.647169	0.763027		-0.450262		0.00673581
sp|Q8K2W3|TXD11_MOUSE	Txndc11	Thioredoxin domain-containing protein 11 OS=Mus musculus GN=Txndc11 PE=2 SV=1	6	11.0293	15.7896		0.571259	1.15702		0.517629		0.0067372
sp|Q9QYY8|SPAST_MOUSE	Spast	Spastin OS=Mus musculus GN=Spast PE=2 SV=3	9	15.8094	9.36063		1.64295	0.599661		-0.756103		0.00673901
sp|Q99KJ8|DCTN2_MOUSE	Dctn2	Dynactin subunit 2 OS=Mus musculus GN=Dctn2 PE=1 SV=3	27	11.285	15.6826		0.678897	0.981214		0.47476		0.00674592
sp|Q9CQF6|ADPPT_MOUSE	Aasdhppt	L-aminoadipate-semialdehyde dehydrogenase-phosphopantetheinyl transferase OS=Mus musculus GN=Aasdhppt PE=2 SV=1	7	14.985	9.73127		0.938105	1.07398		-0.622819		0.0067515
sp|Q3TZX8-2|NOL9_MOUSE	Nol9	Isoform 2 of Polynucleotide 5'-hydroxyl-kinase NOL9 OS=Mus musculus GN=Nol9	3	13.7696	7.87026		1.21251	1.04711		-0.807001		0.00675721
sp|Q3UH60|DIP2B_MOUSE	Dip2b	Disco-interacting protein 2 homolog B OS=Mus musculus GN=Dip2b PE=1 SV=1	25	11.2162	14.5451		0.679649	0.596103		0.374957		0.0067604
sp|Q99LB2|DHRS4_MOUSE	Dhrs4	Dehydrogenase/reductase SDR family member 4 OS=Mus musculus GN=Dhrs4 PE=2 SV=2	11	4.76522	18.8531		0.428538	3.8032		1.98419		0.00676284
sp|Q4VA53-3|PDS5B_MOUSE	Pds5b	Isoform 3 of Sister chromatid cohesion protein PDS5 homolog B OS=Mus musculus GN=Pds5b	56	15.3988	9.13827		0.716623	1.54306		-0.752822		0.00676366
sp|Q9DAR7|DCPS_MOUSE	Dcps	Scavenger mRNA-decapping enzyme DcpS OS=Mus musculus GN=Dcps PE=1 SV=1	10	14.2006	9.39975		1.1324	0.647598		-0.59526		0.00676375
sp|Q8VC65|NRM_MOUSE	Nrm	Nurim OS=Mus musculus GN=Nrm PE=2 SV=1	1	18.3688	8.05434		1.81459	2.13729		-1.18942		0.00676584
sp|Q9CXG9|PHF19_MOUSE	Phf19	PHD finger protein 19 OS=Mus musculus GN=Phf19 PE=2 SV=1	1	16.795	7.57619		0.282494	2.49094		-1.14849		0.00676868
sp|Q6PHZ5|RB15B_MOUSE	Rbm15b	Putative RNA-binding protein 15B OS=Mus musculus GN=Rbm15b PE=1 SV=2	4	16.9329	8.12304		2.24199	0.843433		-1.05974		0.00676924
sp|Q8K212|PACS1_MOUSE	Pacs1	Phosphofurin acidic cluster sorting protein 1 OS=Mus musculus GN=Pacs1 PE=1 SV=2	17	15.7627	9.7312		1.49986	0.672182		-0.695828		0.00681733
sp|P81069-2|GABP2_MOUSE	Gabpb2	Isoform 2 of GA-binding protein subunit beta-2 OS=Mus musculus GN=Gabpb2	3	18.5641	6.41615		2.96262	1.47995		-1.53274		0.00682027
sp|Q8VEH6|CBWD1_MOUSE	Cbwd1	COBW domain-containing protein 1 OS=Mus musculus GN=Cbwd1 PE=2 SV=1	7	14.715	10.1834		0.827705	0.916892		-0.531063		0.00682122
sp|Q80TA6|MTMRC_MOUSE	Mtmr12	Myotubularin-related protein 12 OS=Mus musculus GN=Mtmr12 PE=2 SV=2	9	11.1154	15.2043		0.348389	1.06015		0.451927		0.00683301
sp|Q8CHT3|INT5_MOUSE	Ints5	Integrator complex subunit 5 OS=Mus musculus GN=Ints5 PE=2 SV=1	7	14.4835	9.22055		0.989265	1.04045		-0.651483		0.00683313
sp|P49442|INPP_MOUSE	Inpp1	Inositol polyphosphate 1-phosphatase OS=Mus musculus GN=Inpp1 PE=1 SV=2	7	8.06242	20.6237		0.246994	3.41887		1.35502		0.0068343
sp|Q66JV4|R12BB_MOUSE	Rbm12bb	RNA-binding protein 12B-B OS=Mus musculus GN=Rbm12bb PE=1 SV=2	8	16.332	8.34794		2.15838	0.294681		-0.968207		0.00683431
sp|Q8K4X7|PLCD_MOUSE	Agpat4	1-acyl-sn-glycerol-3-phosphate acyltransferase delta OS=Mus musculus GN=Agpat4 PE=2 SV=1	12	15.0789	7.43603		1.6621	1.26194		-1.01993		0.00684197
sp|P97470|PP4C_MOUSE	Ppp4c	Serine/threonine-protein phosphatase 4 catalytic subunit OS=Mus musculus GN=Ppp4c PE=1 SV=2	7	13.933	9.48921		0.844624	0.872184		-0.554149		0.00685378
sp|Q8K2F0|BRD3_MOUSE	Brd3	Bromodomain-containing protein 3 OS=Mus musculus GN=Brd3 PE=1 SV=2	13	17.2436	9.13377		2.04525	0.856945		-0.916776		0.00685573
tr|E9QJV4|E9QJV4_MOUSE	Prpf39	Uncharacterized protein OS=Mus musculus GN=Prpf39 PE=4 SV=1	12	15.6337	8.17811		1.75804	1.03123		-0.934819		0.00685738
sp|Q9QX47-4|SON_MOUSE	Son	Isoform 4 of Protein SON OS=Mus musculus GN=Son	1	13.6269	9.7017		0.576527	0.905263		-0.490147		0.00685857
sp|Q80YT7-2|MYOME_MOUSE	Pde4dip	Isoform 2 of Myomegalin OS=Mus musculus GN=Pde4dip	10	9.87423	15.2435		0.530835	1.3681		0.626455		0.00685877
sp|P59178|LMBL2_MOUSE	L3mbtl2	Lethal(3)malignant brain tumor-like protein 2 OS=Mus musculus GN=L3mbtl2 PE=1 SV=2	2	14.9551	7.23637		1.86604	0.984951		-1.0473		0.00686031
sp|Q9QX47-3|SON_MOUSE	Son	Isoform 3 of Protein SON OS=Mus musculus GN=Son	32	15.4245	9.24921		0.289801	1.66621		-0.737822		0.00689212
sp|Q80ZM8|CRLS1_MOUSE	Crls1	Cardiolipin synthase OS=Mus musculus GN=Crls1 PE=2 SV=1	1	13.7708	8.15326		1.45347	0.511129		-0.756163		0.00691817
tr|A2AUP1|A2AUP1_MOUSE	Pfkfb3	6-phosphofructo-2-kinase/fructose-2,6-biphosphata se 3 OS=Mus musculus GN=Pfkfb3 PE=4 SV=1	1	16.9747	6.82979		2.60131	0.987145		-1.31347		0.00692087
sp|Q923E4|SIRT1_MOUSE	Sirt1	NAD-dependent deacetylase sirtuin-1 OS=Mus musculus GN=Sirt1 PE=1 SV=2	3	17.6803	9.1241		1.65446	1.66391		-0.954391		0.00692277
sp|Q8BZX4-2|SREK1_MOUSE	Srek1	Isoform 2 of Splicing regulatory glutamine/lysine-rich protein 1 OS=Mus musculus GN=Srek1	11	15.58	9.02396		1.24471	1.30271		-0.78786		0.00696648
sp|Q8CHC4|SYNJ1_MOUSE	Synj1	Synaptojanin-1 OS=Mus musculus GN=Synj1 PE=1 SV=3	8	10.8003	14.7777		0.0713926	1.09126		0.452354		0.00697427
tr|Q6XLQ8|Q6XLQ8_MOUSE	Calu	Calumenin, isoform CRA_b OS=Mus musculus GN=Calu PE=2 SV=1	5	10.7437	17.3484		0.375426	1.77721		0.691304		0.00697738
tr|E9PWW9|E9PWW9_MOUSE	Rsf1	Uncharacterized protein OS=Mus musculus GN=Rsf1 PE=4 SV=1	20	15.1081	8.8707		0.867081	1.48252		-0.768206		0.00700031
sp|O08738|CASP6_MOUSE	Casp6	Caspase-6 OS=Mus musculus GN=Casp6 PE=2 SV=1	4	16.5161	10.3264		1.09811	1.30333		-0.677531		0.00700325
sp|Q33DR2|DPS1_MOUSE	Pdss1	Decaprenyl-diphosphate synthase subunit 1 OS=Mus musculus GN=Pdss1 PE=1 SV=1	1	14.4944	5.24906		2.18331	1.31338		-1.46536		0.00701918
sp|O88952|LIN7C_MOUSE	Lin7c	Protein lin-7 homolog C OS=Mus musculus GN=Lin7c PE=1 SV=2	6	14.7027	9.72704		1.29553	0.452351		-0.596008		0.00703411
sp|P46460|NSF_MOUSE	Nsf	Vesicle-fusing ATPase OS=Mus musculus GN=Nsf PE=1 SV=2	37	10.4282	14.9447		0.568987	1.1087		0.519142		0.00703506
sp|Q9ERU9|RBP2_MOUSE	Ranbp2	E3 SUMO-protein ligase RanBP2 OS=Mus musculus GN=Ranbp2 PE=1 SV=2	112	14.97	9.24342		0.142594	1.57348		-0.695573		0.00703662
sp|Q99M04|LIAS_MOUSE	Lias	Lipoyl synthase, mitochondrial OS=Mus musculus GN=Lias PE=2 SV=1	5	12.8727	8.70216		0.601929	0.980494		-0.564873		0.00703758
sp|Q3U319|BRE1B_MOUSE	Rnf40	E3 ubiquitin-protein ligase BRE1B OS=Mus musculus GN=Rnf40 PE=2 SV=2	17	14.2521	9.01432		0.606738	1.31245		-0.660883		0.00704407
sp|Q8BGC0|HTSF1_MOUSE	Htatsf1	HIV Tat-specific factor 1 homolog OS=Mus musculus GN=Htatsf1 PE=1 SV=1	18	16.7806	10.5642		0.998366	1.39651		-0.667607		0.00704961
sp|Q69ZJ7|RIC1_MOUSE	Kiaa1432	Protein RIC1 homolog OS=Mus musculus GN=Kiaa1432 PE=2 SV=2	3	11.013	14.8419		0.29628	1.01521		0.430461		0.0070511
sp|Q9WV70|NOC2L_MOUSE	Noc2l	Nucleolar complex protein 2 homolog OS=Mus musculus GN=Noc2l PE=1 SV=2	12	16.2541	7.45037		2.30073	0.79569		-1.12542		0.00705788
sp|Q8K2D3|EDC3_MOUSE	Edc3	Enhancer of mRNA-decapping protein 3 OS=Mus musculus GN=Edc3 PE=2 SV=1	12	14.9656	9.49534		0.695165	1.34323		-0.656356		0.00705851
sp|Q04736|YES_MOUSE	Yes1	Tyrosine-protein kinase Yes OS=Mus musculus GN=Yes1 PE=1 SV=3	2	10.9191	16.9878		0.464207	1.61298		0.637645		0.00705904
sp|Q09200|B4GN1_MOUSE	B4galnt1	Beta-1,4 N-acetylgalactosaminyltransferase 1 OS=Mus musculus GN=B4galnt1 PE=2 SV=1	3	9.84264	17.2969		1.85855	0.890633		0.813396		0.00706119
sp|Q8K4E0|ALMS1_MOUSE	Alms1	Alstrom syndrome protein 1 homolog OS=Mus musculus GN=Alms1 PE=1 SV=2	6	14.4724	10.1526		0.799029	0.887264		-0.511451		0.00706232
sp|P62270|RS18_MOUSE	Rps18	40S ribosomal protein S18 OS=Mus musculus GN=Rps18 PE=2 SV=3	35	14.056	9.45361		0.568041	1.13851		-0.572249		0.00706286
sp|Q9D8X5|CNOT8_MOUSE	Cnot8	CCR4-NOT transcription complex subunit 8 OS=Mus musculus GN=Cnot8 PE=2 SV=1	2	12.6063	8.41767		0.553257	1.01692		-0.582656		0.00706365
tr|A2AT37|A2AT37_MOUSE	Upf2	UPF2 regulator of nonsense transcripts homolog (Yeast) OS=Mus musculus GN=Upf2 PE=2 SV=1	13	13.1246	11.1132		0.300427	0.468588		-0.239998		0.00707038
sp|Q8BH16|FBXL2_MOUSE	Fbxl2	F-box/LRR-repeat protein 2 OS=Mus musculus GN=Fbxl2 PE=2 SV=1	2	8.58118	19.2607		1.22844	2.68879		1.16641		0.00707296
tr|Q31093|Q31093_MOUSE	H2-M3	Histocompatibility 2, M region locus 3 OS=Mus musculus GN=H2-M3 PE=1 SV=1	3	9.45764	15.3168		1.49885	0.62012		0.69556		0.00707309
sp|P40124|CAP1_MOUSE	Cap1	Adenylyl cyclase-associated protein 1 OS=Mus musculus GN=Cap1 PE=1 SV=4	47	14.5105	10.699		0.933025	0.494059		-0.439621		0.00708342
sp|Q99KP3|CRYL1_MOUSE	Cryl1	Lambda-crystallin homolog OS=Mus musculus GN=Cryl1 PE=2 SV=3	1	9.04977	21.2581		2.04147	2.69789		1.23206		0.0070883
sp|Q8VDD9|PHIP_MOUSE	Phip	PH-interacting protein OS=Mus musculus GN=Phip PE=1 SV=2	20	15.0582	8.59715		1.39606	1.12106		-0.808622		0.00709109
sp|Q9EQ80|NIF3L_MOUSE	Nif3l1	NIF3-like protein 1 OS=Mus musculus GN=Nif3l1 PE=1 SV=4	8	9.9243	15.0955		0.31219	1.3994		0.605084		0.00709385
sp|Q9CY94|PSF3_MOUSE	Gins3	DNA replication complex GINS protein PSF3 OS=Mus musculus GN=Gins3 PE=2 SV=1	5	19.1982	6.70072		2.85137	1.96839		-1.51858		0.00709537
sp|Q91YH5|ATLA3_MOUSE	Atl3	Atlastin-3 OS=Mus musculus GN=Atl3 PE=2 SV=1	30	10.2132	18.5651		0.116823	2.315		0.862156		0.00711567
sp|Q5XG71|UTP20_MOUSE	Utp20	Small subunit processome component 20 homolog OS=Mus musculus GN=Utp20 PE=2 SV=2	47	15.0071	7.45473		1.84526	0.99587		-1.00942		0.00712166
sp|Q62018|CTR9_MOUSE	Ctr9	RNA polymerase-associated protein CTR9 homolog OS=Mus musculus GN=Ctr9 PE=1 SV=2	18	14.806	8.98914		1.31208	0.946565		-0.719923		0.00716522
sp|Q7TPE5|S7A6O_MOUSE	Slc7a6os	Probable RNA polymerase II nuclear localization protein SLC7A6OS OS=Mus musculus GN=Slc7a6os PE=1 SV=1	4	14.6895	9.63299		0.442001	1.33615		-0.608729		0.00717937
tr|Q9D8U0|Q9D8U0_MOUSE	Ifrd2	Interferon-related developmental regulator 2 OS=Mus musculus GN=Ifrd2 PE=2 SV=1	3	13.8815	7.83587		1.24705	1.13062		-0.824998		0.00718532
sp|P29341|PABP1_MOUSE	Pabpc1	Polyadenylate-binding protein 1 OS=Mus musculus GN=Pabpc1 PE=1 SV=2	86	13.6668	9.57551		0.820631	0.791208		-0.513258		0.00719979
sp|Q5RJG1|NOL10_MOUSE	Nol10	Nucleolar protein 10 OS=Mus musculus GN=Nol10 PE=2 SV=1	10	13.3747	7.01922		1.25305	1.25345		-0.930123		0.00721987
sp|Q08122-1|TLE3_MOUSE	Tle3	Isoform 1 of Transducin-like enhancer protein 3 OS=Mus musculus GN=Tle3	7	16.3008	9.12096		1.21705	1.59176		-0.837683		0.00723181
sp|Q9CPS7|PNO1_MOUSE	Pno1	RNA-binding protein PNO1 OS=Mus musculus GN=Pno1 PE=2 SV=1	2	15.0548	6.883		2.00073	1.09405		-1.12911		0.0072329
sp|P34884|MIF_MOUSE	Mif	Macrophage migration inhibitory factor OS=Mus musculus GN=Mif PE=1 SV=2	7	15.4995	7.76667		1.36094	1.67547		-0.996851		0.00723415
sp|Q9CWU6|UQCC_MOUSE	Uqcc	Ubiquinol-cytochrome c reductase complex chaperone CBP3 homolog OS=Mus musculus GN=Uqcc PE=2 SV=1	3	14.4775	7.31403		1.61855	1.17665		-0.985074		0.00724161
sp|Q9CZK6|ANKS3_MOUSE	Anks3	Ankyrin repeat and SAM domain-containing protein 3 OS=Mus musculus GN=Anks3 PE=2 SV=2	1	6.71509	20.2063		0.677556	3.70672		1.58933		0.00724186
tr|E9Q6U4|E9Q6U4_MOUSE	Pfdn4	Uncharacterized protein OS=Mus musculus GN=Pfdn4 PE=4 SV=1	2	14.7089	9.41045		1.07041	1.02163		-0.644351		0.00724259
tr|E9QKE4|E9QKE4_MOUSE	Rab3gap2	Uncharacterized protein OS=Mus musculus GN=Rab3gap2 PE=4 SV=1	27	10.1643	15.2731		0.543861	1.31985		0.58749		0.00724516
sp|Q8BGV4|CH041_MOUSE		Uncharacterized protein C8orf41 homolog OS=Mus musculus PE=2 SV=1	1	14.1568	10.3024		0.777797	0.745361		-0.45851		0.00724877
sp|Q8BU88|RM22_MOUSE	Mrpl22	39S ribosomal protein L22, mitochondrial OS=Mus musculus GN=Mrpl22 PE=2 SV=1	5	13.7813	9.71665		0.905109	0.686924		-0.504177		0.00725006
tr|F6Q475|F6Q475_MOUSE	Ftsj1	Uncharacterized protein (Fragment) OS=Mus musculus GN=Ftsj1 PE=4 SV=1	3	15.5111	9.60897		1.03829	1.28357		-0.69085		0.00725857
sp|Q61599|GDIR2_MOUSE	Arhgdib	Rho GDP-dissociation inhibitor 2 OS=Mus musculus GN=Arhgdib PE=1 SV=3	17	7.11908	18.1069		1.03699	2.89302		1.34678		0.00726024
sp|Q93092|TALDO_MOUSE	Taldo1	Transaldolase OS=Mus musculus GN=Taldo1 PE=1 SV=2	28	12.9762	10.1024		0.770808	0.23098		-0.361161		0.00726729
sp|Q9QVP9|FAK2_MOUSE	Ptk2b	Protein-tyrosine kinase 2-beta OS=Mus musculus GN=Ptk2b PE=1 SV=1	14	8.9433	21.7054		0.609294	3.52021		1.27918		0.00726771
sp|Q8VEL0-2|MSPD1_MOUSE	Mospd1	Isoform 2 of Motile sperm domain-containing protein 1 OS=Mus musculus GN=Mospd1	2	14.7983	8.64597		1.64456	0.510152		-0.775328		0.0072696
sp|Q9WU78-3|PDC6I_MOUSE	Pdcd6ip	Isoform 3 of Programmed cell death 6-interacting protein OS=Mus musculus GN=Pdcd6ip	54	10.5915	16.236		1.12547	1.1096		0.616295		0.0072701
sp|Q9CZU6|CISY_MOUSE	Cs	Citrate synthase, mitochondrial OS=Mus musculus GN=Cs PE=1 SV=1	32	15.8379	9.22817		1.6131	0.906133		-0.779261		0.00727014
sp|O70126|AURKB_MOUSE	Aurkb	Serine/threonine-protein kinase 12 OS=Mus musculus GN=Aurkb PE=1 SV=2	5	20.137	8.61999		2.17906	2.38028		-1.22409		0.00727787
sp|Q33DR3|DLP1_MOUSE	Pdss2	Decaprenyl-diphosphate synthase subunit 2 OS=Mus musculus GN=Pdss2 PE=1 SV=2	3	14.1895	8.02085		1.52344	0.817142		-0.823		0.00727856
sp|Q8K0D0-2|CDK17_MOUSE	Cdk17	Isoform 2 of Cyclin-dependent kinase 17 OS=Mus musculus GN=Cdk17	5	15.4224	9.8832		1.43022	0.602593		-0.641974		0.00728012
sp|P63034-2|CYH2_MOUSE	Cyth2	Isoform 2 of Cytohesin-2 OS=Mus musculus GN=Cyth2	2	15.1731	6.1977		2.42897	0.660202		-1.29171		0.00728979
sp|O08688|CAN5_MOUSE	Capn5	Calpain-5 OS=Mus musculus GN=Capn5 PE=2 SV=1	6	8.14932	19.82		2.1931	2.42927		1.28221		0.00729192
sp|O08785-2|CLOCK_MOUSE	Clock	Isoform Short of Circadian locomoter output cycles protein kaput OS=Mus musculus GN=Clock	1	14.4984	10.9173		0.229729	0.977953		-0.40927		0.00729376
tr|E9PWM3|E9PWM3_MOUSE	Armcx4	Uncharacterized protein OS=Mus musculus GN=Armcx4 PE=4 SV=1	5	20.1663	10.7198		0.635862	2.57462		-0.911665		0.0072987
sp|Q9CQI4|CK074_MOUSE	Nwc	Uncharacterized protein C11orf74 homolog OS=Mus musculus GN=Nwc PE=2 SV=1	1	8.94054	16.9697		1.1304	1.94965		0.924524		0.00730121
tr|B9EJR8|B9EJR8_MOUSE	Heatr2	HEAT repeat containing 2 OS=Mus musculus GN=Heatr2 PE=2 SV=1	8	13.9218	8.84401		1.29725	0.590956		-0.654577		0.00730206
sp|P47757|CAPZB_MOUSE	Capzb	F-actin-capping protein subunit beta OS=Mus musculus GN=Capzb PE=1 SV=3	1	18.9447	8.47431		2.62723	1.31685		-1.16063		0.00730418
sp|Q99KJ5|TCF19_MOUSE	Tcf19	Transcription factor 19-like protein OS=Mus musculus GN=Tcf19 PE=2 SV=1	1	18.5906	10.317		1.99772	1.18827		-0.849554		0.00730683
sp|Q8BH24|TM9S4_MOUSE	Tm9sf4	Transmembrane 9 superfamily member 4 OS=Mus musculus GN=Tm9sf4 PE=2 SV=1	20	8.28275	18.3986		0.475251	2.80158		1.15141		0.00730732
tr|B2RRI2|B2RRI2_MOUSE	Sbno1	Sbno1 protein OS=Mus musculus GN=Sbno1 PE=2 SV=1	21	15.7671	8.44487		1.92752	0.717246		-0.900768		0.00730836
sp|Q9ESX4-2|NO40_MOUSE	Zcchc17	Isoform 2 of Nucleolar protein of 40 kDa OS=Mus musculus GN=Zcchc17	4	17.3932	6.52019		3.03101	0.416081		-1.41554		0.00732206
sp|Q922P9|GLYR1_MOUSE	Glyr1	Putative oxidoreductase GLYR1 OS=Mus musculus GN=Glyr1 PE=2 SV=1	20	15.1517	9.9323		1.2051	0.83877		-0.609276		0.00732312
sp|Q9CWT6|DDX28_MOUSE	Ddx28	Probable ATP-dependent RNA helicase DDX28 OS=Mus musculus GN=Ddx28 PE=2 SV=2	7	15.5651	8.95528		1.72718	0.689756		-0.797504		0.00732514
sp|P51174|ACADL_MOUSE	Acadl	Long-chain specific acyl-CoA dehydrogenase, mitochondrial OS=Mus musculus GN=Acadl PE=2 SV=2	31	9.82627	17.6858		1.88267	1.15928		0.847878		0.0073268
tr|Q5SWP0|Q5SWP0_MOUSE	Tbrg4	Transforming growth factor beta regulated gene 4 (Fragment) OS=Mus musculus GN=Tbrg4 PE=2 SV=1	1	14.3405	7.02916		1.45105	1.45725		-1.02867		0.00732698
sp|P27577|ETS1_MOUSE	Ets1	Protein C-ets-1 OS=Mus musculus GN=Ets1 PE=1 SV=2	1	19.5475	5.31739		3.97604	0.459241		-1.87819		0.00733046
sp|Q6PFQ7|RASL2_MOUSE	Rasa4	Ras GTPase-activating protein 4 OS=Mus musculus GN=Rasa4 PE=2 SV=1	18	13.9307	7.58423		1.3732	1.14769		-0.877192		0.0073314
sp|Q5H8C4|VP13A_MOUSE	Vps13a	Vacuolar protein sorting-associated protein 13A OS=Mus musculus GN=Vps13a PE=1 SV=1	29	13.6023	9.97655		0.950591	0.376162		-0.447238		0.0073319
sp|Q920V1|B3GL1_MOUSE	B3galnt1	UDP-GalNAc:beta-1,3-N-acetylgalactosaminyltransferase 1 OS=Mus musculus GN=B3galnt1 PE=2 SV=2	3	15.326	9.50127		1.44697	0.768068		-0.689789		0.00733217
sp|Q9D4H9-2|PHF14_MOUSE	Phf14	Isoform 2 of PHD finger protein 14 OS=Mus musculus GN=Phf14	9	13.1647	8.16083		1.0569	0.932672		-0.689887		0.0073335
sp|Q7TMB8|CYFP1_MOUSE	Cyfip1	Cytoplasmic FMR1-interacting protein 1 OS=Mus musculus GN=Cyfip1 PE=1 SV=1	40	10.75	14.8288		0.912705	0.699537		0.464058		0.00733355
sp|P27546-2|MAP4_MOUSE	Map4	Isoform 2 of Microtubule-associated protein 4 OS=Mus musculus GN=Map4	102	10.1163	16.3764		0.322352	1.73402		0.694941		0.00733376
sp|O88597|BECN1_MOUSE	Becn1	Beclin-1 OS=Mus musculus GN=Becn1 PE=1 SV=3	8	10.4149	15.4606		0.482773	1.33779		0.569945		0.00733498
tr|B2RXW8|B2RXW8_MOUSE	Ppfia1	Ppfia1 protein OS=Mus musculus GN=Ppfia1 PE=2 SV=1	29	11.0884	15.4742		0.694063	1.02282		0.480812		0.00733533
sp|Q8R2M2|TDIF2_MOUSE	Dnttip2	Deoxynucleotidyltransferase terminal-interacting protein 2 OS=Mus musculus GN=Dnttip2 PE=1 SV=1	25	15.3614	7.35159		1.15929	1.93668		-1.06318		0.00733552
sp|Q8BTZ5|ANR46_MOUSE	Ankrd46	Ankyrin repeat domain-containing protein 46 OS=Mus musculus GN=Ankrd46 PE=2 SV=1	2	8.93884	16.2347		0.7352	1.92105		0.860925		0.00733666
sp|Q8R1N0|ZN830_MOUSE	Znf830	Zinc finger protein 830 OS=Mus musculus GN=Znf830 PE=1 SV=1	5	15.0698	8.97698		0.990683	1.40447		-0.747358		0.00733684
sp|P33173|KIF1A_MOUSE	Kif1a	Kinesin-like protein KIF1A OS=Mus musculus GN=Kif1a PE=1 SV=2	11	9.681	19.1412		0.932115	2.49657		0.983451		0.00733722
sp|P70175|DLG3_MOUSE	Dlg3	Disks large homolog 3 OS=Mus musculus GN=Dlg3 PE=1 SV=1	3	17.2032	7.61223		2.68437	0.296659		-1.17628		0.00733845
sp|A2A432|CUL4B_MOUSE	Cul4b	Cullin-4B OS=Mus musculus GN=Cul4b PE=1 SV=1	47	16.2107	9.56699		1.58201	0.999687		-0.760807		0.00733952
sp|Q9CY18|SNX7_MOUSE	Snx7	Sorting nexin-7 OS=Mus musculus GN=Snx7 PE=2 SV=1	17	14.7239	9.56199		0.787366	1.22226		-0.622781		0.00734123
sp|Q9D824|FIP1_MOUSE	Fip1l1	Pre-mRNA 3'-end-processing factor FIP1 OS=Mus musculus GN=Fip1l1 PE=1 SV=1	11	13.9028	9.2634		0.552299	1.18723		-0.585761		0.00734714
sp|Q7TN29|SMAP2_MOUSE	Smap2	Stromal membrane-associated protein 2 OS=Mus musculus GN=Smap2 PE=1 SV=1	7	16.302	8.17276		1.78132	1.44934		-0.996154		0.00736027
tr|E9QPQ8|E9QPQ8_MOUSE	Mrpl48	Uncharacterized protein OS=Mus musculus GN=Mrpl48 PE=4 SV=1	2	15.4893	6.94622		2.16941	1.0566		-1.15697		0.00736042
sp|Q91VY9|ZN622_MOUSE	Znf622	Zinc finger protein 622 OS=Mus musculus GN=Znf622 PE=2 SV=1	8	13.5628	9.71932		0.895988	0.614254		-0.480724		0.00736335
sp|Q8CH18-3|CCAR1_MOUSE	Ccar1	Isoform 3 of Cell division cycle and apoptosis regulator protein 1 OS=Mus musculus GN=Ccar1	27	14.9031	9.70861		1.0132	1.06113		-0.618272		0.0073636
sp|Q9DB96|NGDN_MOUSE	Ngdn	Neuroguidin OS=Mus musculus GN=Ngdn PE=1 SV=1	6	14.3559	6.78263		1.41195	1.60865		-1.08172		0.00736571
sp|Q9Z2Y8|PROSC_MOUSE	Prosc	Proline synthase co-transcribed bacterial homolog protein OS=Mus musculus GN=Prosc PE=1 SV=1	12	11.1554	16.0735		0.874172	1.08054		0.526946		0.00736691
sp|Q9CWU2|ZDH13_MOUSE	Zdhhc13	Palmitoyltransferase ZDHHC13 OS=Mus musculus GN=Zdhhc13 PE=1 SV=2	5	8.98455	15.4436		1.06579	1.48318		0.781487		0.00737138
sp|Q52KR3-6|PRUN2_MOUSE	Prune2	Isoform 6 of Protein prune homolog 2 OS=Mus musculus GN=Prune2	11	13.5162	8.25394		0.418678	1.42832		-0.711538		0.00737522
sp|Q9JL60|GMEB1_MOUSE	Gmeb1	Glucocorticoid modulatory element-binding protein 1 OS=Mus musculus GN=Gmeb1 PE=2 SV=2	3	18.9057	8.18102		2.62032	1.53102		-1.20847		0.0073838
tr|Q6ZQ33|Q6ZQ33_MOUSE	Rab11fip5	MKIAA0857 protein (Fragment) OS=Mus musculus GN=Rab11fip5 PE=2 SV=1	24	11.9004	15.0352		0.624757	0.629915		0.33733		0.00738404
sp|Q8K1X1|WDR11_MOUSE	Wdr11	WD repeat-containing protein 11 OS=Mus musculus GN=Wdr11 PE=2 SV=1	22	9.99603	15.5031		0.49144	1.47976		0.633127		0.00739141
sp|Q3UJD6-2|UBP19_MOUSE	Usp19	Isoform 2 of Ubiquitin carboxyl-terminal hydrolase 19 OS=Mus musculus GN=Usp19	17	14.6992	10.9793		0.720203	0.768832		-0.420948		0.00739402
tr|Q6NZL1|Q6NZL1_MOUSE	Dhx37	DEAH (Asp-Glu-Ala-His) box polypeptide 37 OS=Mus musculus GN=Dhx37 PE=2 SV=1	11	15.2711	6.76755		2.36591	0.456235		-1.1741		0.00740463
sp|Q99N96|RM01_MOUSE	Mrpl1	39S ribosomal protein L1, mitochondrial OS=Mus musculus GN=Mrpl1 PE=1 SV=2	6	14.2111	9.43077		0.873404	1.03578		-0.591571		0.00740813
sp|Q5EBG6|HSPB6_MOUSE	Hspb6	Heat shock protein beta-6 OS=Mus musculus GN=Hspb6 PE=1 SV=1	2	19.2809	1.51809		5.0348	0.141563		-3.66685		0.00741317
sp|Q91YJ3|THYN1_MOUSE	Thyn1	Thymocyte nuclear protein 1 OS=Mus musculus GN=Thyn1 PE=1 SV=1	12	11.1514	14.6854		0.751242	0.662989		0.397159		0.00741326
sp|Q5U5Q9|UIMC1_MOUSE	Uimc1	BRCA1-A complex subunit RAP80 OS=Mus musculus GN=Uimc1 PE=1 SV=2	2	16.586	9.33605		1.17032	1.69069		-0.829085		0.00741524
sp|O08583|THOC4_MOUSE	Thoc4	THO complex subunit 4 OS=Mus musculus GN=Thoc4 PE=1 SV=3	23	16.2326	8.35358		2.0013	0.995412		-0.958428		0.00741804
sp|Q61749-2|EI2BD_MOUSE	Eif2b4	Isoform 2 of Translation initiation factor eIF-2B subunit delta OS=Mus musculus GN=Eif2b4	15	13.4785	9.14901		0.944284	0.787061		-0.558973		0.00743397
sp|Q99LJ6|GPX7_MOUSE	Gpx7	Glutathione peroxidase 7 OS=Mus musculus GN=Gpx7 PE=2 SV=1	14	0.921034	21.9475		0.306642	5.96182		4.57466		0.00743598
sp|Q8BIX3-2|CK046_MOUSE		Isoform 2 of Uncharacterized protein C11orf46 homolog OS=Mus musculus	2	13.3376	8.99186		0.30274	1.19671		-0.568811		0.00743758
sp|Q99LX0|PARK7_MOUSE	Park7	Protein DJ-1 OS=Mus musculus GN=Park7 PE=1 SV=1	28	15.3776	10.069		0.603485	1.38176		-0.610903		0.00743975
sp|Q91W89|MA2C1_MOUSE	Man2c1	Alpha-mannosidase 2C1 OS=Mus musculus GN=Man2c1 PE=1 SV=1	12	7.71806	20.3559		0.548923	3.55		1.39913		0.00744094
sp|Q80Y81-2|RNZ2_MOUSE	Elac2	Isoform 2 of Zinc phosphodiesterase ELAC protein 2 OS=Mus musculus GN=Elac2	20	13.4877	9.2214		0.994742	0.692737		-0.548584		0.00744186
sp|A2A6T1|CDR2L_MOUSE	Cdr2l	Cerebellar degeneration-related protein 2-like OS=Mus musculus GN=Cdr2l PE=2 SV=1	5	7.83295	11.596		0.528137	0.929846		0.565995		0.00744242
sp|Q80Y19|RHGBA_MOUSE	Arhgap11a	Rho GTPase-activating protein 11A OS=Mus musculus GN=Arhgap11a PE=1 SV=2	4	13.6011	10.0073		0.973543	0.309238		-0.442664		0.00744434
sp|Q9CQL6|RM35_MOUSE	Mrpl35	39S ribosomal protein L35, mitochondrial OS=Mus musculus GN=Mrpl35 PE=2 SV=1	2	14.0716	9.8025		0.773884	0.935522		-0.521565		0.00744464
sp|P21619|LMNB2_MOUSE	Lmnb2	Lamin-B2 OS=Mus musculus GN=Lmnb2 PE=1 SV=2	25	15.6546	10.7196		1.28736	0.558242		-0.546336		0.00744605
sp|Q9D7A8|ARMC1_MOUSE	Armc1	Armadillo repeat-containing protein 1 OS=Mus musculus GN=Armc1 PE=2 SV=1	4	15.6936	8.5509		1.04994	1.73881		-0.876025		0.0074465
sp|P11214|TPA_MOUSE	Plat	Tissue-type plasminogen activator OS=Mus musculus GN=Plat PE=1 SV=3	3	15.4559	10.3441		1.29763	0.657281		-0.579343		0.00745642
sp|Q9CWW7|CXXC1_MOUSE	Cxxc1	CpG-binding protein OS=Mus musculus GN=Cxxc1 PE=2 SV=1	5	14.4413	10.0693		0.26447	1.21652		-0.520234		0.00745992
sp|P61022|CHP1_MOUSE	Chp	Calcium-binding protein p22 OS=Mus musculus GN=Chp PE=2 SV=2	7	15.5661	9.74045		0.856365	1.42022		-0.676351		0.00745993
sp|Q80U78-2|PUM1_MOUSE	Pum1	Isoform 2 of Pumilio homolog 1 OS=Mus musculus GN=Pum1	16	16.3567	8.66063		1.9121	1.07034		-0.917334		0.00746148
sp|Q6A051-2|ATRN1_MOUSE	Atrnl1	Isoform 2 of Attractin-like protein 1 OS=Mus musculus GN=Atrnl1	1	10.0425	16.5481		1.2872	1.33144		0.720545		0.00746295
sp|P42337|PK3CA_MOUSE	Pik3ca	Phosphatidylinositol-4,5-bisphosphate 3-kinase catalytic subunit alpha isoform OS=Mus musculus GN=Pik3ca PE=1 SV=2	8	15.4205	9.59701		0.507443	1.58102		-0.684192		0.007485
sp|Q01405|SC23A_MOUSE	Sec23a	Protein transport protein Sec23A OS=Mus musculus GN=Sec23a PE=1 SV=2	29	10.0096	16.9846		0.780378	1.82881		0.762834		0.00748666
sp|Q9D8X1|CUTC_MOUSE	Cutc	Copper homeostasis protein cutC homolog OS=Mus musculus GN=Cutc PE=2 SV=1	1	11.1712	14.9441		0.29672	1.034		0.419795		0.0074874
sp|P52633|STAT6_MOUSE	Stat6	Signal transducer and transcription activator 6 OS=Mus musculus GN=Stat6 PE=2 SV=2	12	10.1225	15.5492		0.406679	1.49483		0.619278		0.00751383
sp|Q8CFH6|SIK2_MOUSE	Sik2	Serine/threonine-protein kinase SIK2 OS=Mus musculus GN=Sik2 PE=1 SV=1	4	15.3856	11.6014		0.568461	0.918794		-0.407282		0.00751398
sp|Q8BX10-2|PGAM5_MOUSE	Pgam5	Isoform 2 of Serine/threonine-protein phosphatase PGAM5, mitochondrial OS=Mus musculus GN=Pgam5	15	14.2793	9.17554		1.07954	0.979862		-0.638063		0.00752033
sp|O88413|TULP3_MOUSE	Tulp3	Tubby-related protein 3 OS=Mus musculus GN=Tulp3 PE=1 SV=1	13	10.7108	14.3071		0.895691	0.50296		0.417667		0.00752239
tr|Q8R2U2|Q8R2U2_MOUSE	BC027231	Uncharacterized protein OS=Mus musculus GN=BC027231 PE=2 SV=1	6	13.9711	8.61335		1.34877	0.725121		-0.697799		0.00752828
sp|Q60848-2|HELLS_MOUSE	Hells	Isoform 2 of Lymphocyte-specific helicase OS=Mus musculus GN=Hells	21	19.3498	6.34662		3.55231	1.09192		-1.60826		0.00753073
sp|Q9JLM8|DCLK1_MOUSE	Dclk1	Serine/threonine-protein kinase DCLK1 OS=Mus musculus GN=Dclk1 PE=1 SV=1	5	17.1852	10.9635		1.23257	1.28254		-0.648456		0.00753293
sp|Q3UHU5-3|CC165_MOUSE	Ccdc165	Isoform 3 of Coiled-coil domain-containing protein 165 OS=Mus musculus GN=Ccdc165	3	12.9633	7.91692		1.43924	0.10866		-0.711426		0.00753967
sp|P97454|SMAD5_MOUSE	Smad5	Mothers against decapentaplegic homolog 5 OS=Mus musculus GN=Smad5 PE=1 SV=2	7	17.0016	9.68543		1.87953	0.921865		-0.811779		0.00754814
sp|Q91VB4|HPS3_MOUSE	Hps3	Hermansky-Pudlak syndrome 3 protein homolog OS=Mus musculus GN=Hps3 PE=2 SV=2	2	9.21888	15.2001		1.35226	1.04968		0.721414		0.00755076
sp|Q8C5L6|INP5K_MOUSE	Inpp5k	Inositol polyphosphate 5-phosphatase K OS=Mus musculus GN=Inpp5k PE=2 SV=2	2	8.34595	17.7522		1.18157	2.41998		1.08885		0.00755642
sp|O35887|CALU_MOUSE	Calu	Calumenin OS=Mus musculus GN=Calu PE=1 SV=1	51	11.2865	16.7442		1.32376	0.831862		0.569056		0.00756864
sp|Q8C854|MYEF2_MOUSE	Myef2	Myelin expression factor 2 OS=Mus musculus GN=Myef2 PE=1 SV=1	22	16.0318	8.72862		0.534545	2.02521		-0.877113		0.00759325
sp|Q61029-2|LAP2B_MOUSE	Tmpo	Isoform Delta of Lamina-associated polypeptide 2, isoforms beta/delta/epsilon/gamma OS=Mus musculus GN=Tmpo	21	15.8675	10.6053		0.392828	1.457		-0.581285		0.00759401
sp|O08807|PRDX4_MOUSE	Prdx4	Peroxiredoxin-4 OS=Mus musculus GN=Prdx4 PE=1 SV=1	24	15.9176	10.7282		1.00781	1.09628		-0.569217		0.00760429
sp|Q9D1C8|VPS28_MOUSE	Vps28	Vacuolar protein sorting-associated protein 28 homolog OS=Mus musculus GN=Vps28 PE=2 SV=1	2	14.7664	9.07947		1.03281	1.26411		-0.701635		0.00760914
sp|Q8VEE4|RFA1_MOUSE	Rpa1	Replication protein A 70 kDa DNA-binding subunit OS=Mus musculus GN=Rpa1 PE=2 SV=1	27	16.9323	8.12695		1.64812	1.91828		-1.05899		0.00762228
sp|P29758|OAT_MOUSE	Oat	Ornithine aminotransferase, mitochondrial OS=Mus musculus GN=Oat PE=1 SV=1	31	10.0003	15.6134		0.519795	1.52737		0.642748		0.00763935
tr|Q80U83|Q80U83_MOUSE	Sec24c	MKIAA0079 protein (Fragment) OS=Mus musculus GN=Sec24c PE=2 SV=1	22	9.5901	16.609		0.692297	1.89567		0.792351		0.00764463
sp|P14211|CALR_MOUSE	Calr	Calreticulin OS=Mus musculus GN=Calr PE=1 SV=1	111	11.3812	16.391		0.755122	1.22815		0.526252		0.00766189
sp|Q501J6|DDX17_MOUSE	Ddx17	Probable ATP-dependent RNA helicase DDX17 OS=Mus musculus GN=Ddx17 PE=2 SV=1	62	15.8761	8.56693		0.887075	1.90724		-0.890007		0.00766573
sp|O70422|TF2H4_MOUSE	Gtf2h4	General transcription factor IIH subunit 4 OS=Mus musculus GN=Gtf2h4 PE=2 SV=1	3	14.7295	8.73098		1.61439	0.615395		-0.754497		0.00766599
sp|P11930|NUD19_MOUSE	Nudt19	Nucleoside diphosphate-linked moiety X motif 19, mitochondrial OS=Mus musculus GN=Nudt19 PE=1 SV=2	6	10.4288	14.1805		0.451044	0.981871		0.443332		0.00766866
sp|Q60715|P4HA1_MOUSE	P4ha1	Prolyl 4-hydroxylase subunit alpha-1 OS=Mus musculus GN=P4ha1 PE=2 SV=2	3	9.36929	16.0188		0.794763	1.74235		0.773751		0.0076718
[truncated: 5,966 more rows]

## Sheet: All Data
				Normalized %RA							Average %RA			%RA STDEV			Ratio		Log2(Ratio)		IMP2-KO/Wt
Protein annotation	Gene symbol	Protein description	# of peptides used for quantification	IMP2-KO1	IMP2-KO2	IMP2-KO3	WT1	WT2	WT3		WT	IMP2-KO		WT	IMP2-KO		IMP2-KO/Wt		IMP2-KO/Wt		p-value	Rank	BH p-value
sp|Q8BLI4|DSE_MOUSE	Dse	Dermatan-sulfate epimerase OS=Mus musculus GN=Dse PE=2 SV=1	16	23.923	23.7148	23.3216	5.44613	5.13249	4.90415		5.16092	23.6531		0.272106	0.305406		4.58312		2.19633		7.97111e-08	1	0.000634819
sp|Q80W94|MOGT2_MOUSE	Mogat2	2-acylglycerol O-acyltransferase 2 OS=Mus musculus GN=Mogat2 PE=1 SV=1	1	1.76566	0.663439	1.04631	24.1929	25.0229	24.5639		24.5932	1.15847		0.415777	0.559605		0.0471052		-4.40797		2.60559e-07	2	0.00103754
tr|Q7TNL7|Q7TNL7_MOUSE	Dusp9	Dual specificity phosphatase 9 OS=Mus musculus GN=Dusp9 PE=2 SV=1	2	0.131173	0.08341	0.505863	23.6445	22.6701	24.1477		23.4874	0.240149		0.751218	0.231351		0.0102246		-6.61182		4.34565e-07	3	0.00115363
sp|Q8K389|CK5P2_MOUSE	Cdk5rap2	CDK5 regulatory subunit-associated protein 2 OS=Mus musculus GN=Cdk5rap2 PE=1 SV=3	17	8.98254	9.39035	8.60101	17.1007	17.0298	16.3088		16.8131	8.9913		0.438173	0.394743		0.534779		-0.902984		1.06387e-05	64	0.00132385
sp|P27048|RSMB_MOUSE	Snrpb	Small nuclear ribonucleoprotein-associated protein B OS=Mus musculus GN=Snrpb PE=1 SV=1	8	6.98942	5.92598	7.39567	17.1563	16.9169	16.9531		17.0088	6.77036		0.129043	0.758939		0.398051		-1.32897		1.05219e-05	63	0.00133011
sp|Q922J3|CLIP1_MOUSE	Clip1	CAP-Gly domain-containing linker protein 1 OS=Mus musculus GN=Clip1 PE=1 SV=1	70	18.3138	17.4281	17.7944	9.63636	8.67435	9.26173		9.19081	17.8454		0.48491	0.44505		1.94166		0.95729		1.10082e-05	65	0.00134876
sp|P62880|GBB2_MOUSE	Gnb2	Guanine nucleotide-binding protein G(I)/G(S)/G(T) subunit beta-2 OS=Mus musculus GN=Gnb2 PE=1 SV=3	4	17.2275	17.5236	17.6066	9.35388	9.04038	8.16761		8.85396	17.4526		0.614715	0.199282		1.97116		0.979045		1.0501e-05	62	0.00134887
sp|Q9CWR7|STEA1_MOUSE	Steap1	Metalloreductase STEAP1 OS=Mus musculus GN=Steap1 PE=1 SV=2	6	1.19963	1.83466	1.5416	15.063	14.3218	16.1204		15.1684	1.5253		0.903921	0.317829		0.100558		-3.31391		8.02138e-06	47	0.0013592
sp|Q9QUN7|TLR2_MOUSE	Tlr2	Toll-like receptor 2 OS=Mus musculus GN=Tlr2 PE=1 SV=1	3	0.687823	0.829869	1.24857	23.4538	26.7479	24.7872		24.9963	0.922087		1.65697	0.291526		0.036889		-4.76067		7.86528e-06	46	0.00136172
tr|B7ZNL9|B7ZNL9_MOUSE	Tatdn2	Tatdn2 protein OS=Mus musculus GN=Tatdn2 PE=2 SV=1	1	9.34936	8.58424	9.06901	15.8401	16.5648	16.4343		16.2797	9.00087		0.386284	0.387085		0.552888		-0.854941		1.04878e-05	61	0.00136926
tr|E9PYK3|E9PYK3_MOUSE	Parp4	Uncharacterized protein OS=Mus musculus GN=Parp4 PE=4 SV=1	10	17.2746	18.2807	18.5171	8.39726	7.93642	8.08974		8.14114	18.0241		0.23468	0.659789		2.21396		1.14663		8.30977e-06	48	0.00137873
sp|Q64131-2|RUNX3_MOUSE	Runx3	Isoform 2 of Runt-related transcription factor 3 OS=Mus musculus GN=Runx3	1	2.74378	2.43096	3.43058	23.2059	22.1679	20.4827		21.9522	2.86844		1.37436	0.511337		0.130668		-2.93603		1.14698e-05	66	0.00138403
sp|O55236|MCE1_MOUSE	Rngtt	mRNA-capping enzyme OS=Mus musculus GN=Rngtt PE=1 SV=1	6	7.85382	6.72956	7.71972	18.1623	18.5376	17.5278		18.0759	7.43437		0.510414	0.614052		0.411286		-1.28179		1.04357e-05	60	0.00138516
sp|Q9DB00|GON4L_MOUSE	Gon4l	GON-4-like protein OS=Mus musculus GN=Gon4l PE=1 SV=3	3	8.55803	8.57196	8.89661	17.5646	16.7084	16.554		16.9423	8.67553		0.5444	0.191585		0.512062		-0.965608		7.83299e-06	45	0.00138627
sp|Q99MB2|MTFR1_MOUSE	Mtfr1	Mitochondrial fission regulator 1 OS=Mus musculus GN=Mtfr1 PE=1 SV=1	3	9.18483	9.01613	9.80642	14.815	14.9871	14.8216		14.8746	9.33579		0.0975126	0.416212		0.627635		-0.672003		1.16726e-05	67	0.00138747
sp|Q8BWD8|CDK19_MOUSE	Cdk19	Cyclin-dependent kinase 19 OS=Mus musculus GN=Cdk19 PE=2 SV=1	3	8.99673	8.20035	8.77504	17.3	16.534	16.4158		16.7499	8.65737		0.480024	0.411022		0.51686		-0.952154		1.22294e-05	70	0.00139136
sp|Q6PDX6-2|RN220_MOUSE	Rnf220	Isoform 2 of E3 ubiquitin-protein ligase Rnf220 OS=Mus musculus GN=Rnf220	2	7.62282	6.55763	6.96021	18.9258	19.5854	18.0809		18.864	7.04689		0.754149	0.537859		0.373562		-1.42058		1.24145e-05	71	0.00139252
sp|Q9CQ19|MYL9_MOUSE	Myl9	Myosin regulatory light polypeptide 9 OS=Mus musculus GN=Myl9 PE=1 SV=3	40	7.22015	7.7255	7.54097	11.4869	11.7451	11.8392		11.6904	7.49554		0.182409	0.25572		0.641171		-0.64122		1.03502e-05	59	0.0013971
sp|P26645|MARCS_MOUSE	Marcks	Myristoylated alanine-rich C-kinase substrate OS=Mus musculus GN=Marcks PE=1 SV=2	20	18.6898	18.7755	19.3709	8.99775	7.6822	7.68783		8.12259	18.9454		0.757913	0.370977		2.33243		1.22184		1.21536e-05	69	0.00140277
sp|Q80YV4-2|PANK4_MOUSE	Pank4	Isoform 2 of Pantothenate kinase 4 OS=Mus musculus GN=Pank4	7	10.2569	10.2238	9.60408	19.2567	18.5803	19.5998		19.1456	10.0283		0.518751	0.367723		0.523789		-0.932942		7.80159e-06	44	0.00141209
sp|Q69ZR2|HECD1_MOUSE	Hectd1	E3 ubiquitin-protein ligase HECTD1 OS=Mus musculus GN=Hectd1 PE=1 SV=2	48	16.7606	15.8155	15.9313	8.8206	8.35553	8.62467		8.60027	16.1691		0.233493	0.515487		1.88007		0.910789		1.02884e-05	58	0.0014127
sp|Q9D2D7|ZN687_MOUSE	Znf687	Zinc finger protein 687 OS=Mus musculus GN=Znf687 PE=2 SV=1	2	5.86295	4.85369	6.26132	17.1983	18.1308	17.3416		17.5569	5.65932		0.50215	0.725572		0.322342		-1.63334		9.96307e-06	56	0.00141689
sp|P56873|SSA27_MOUSE	Sssca1	Sjoegren syndrome/scleroderma autoantigen 1 homolog OS=Mus musculus GN=Sssca1 PE=2 SV=1	8	5.72425	5.09296	5.89669	15.8068	17.0857	16.0486		16.3137	5.5713		0.679415	0.423132		0.341511		-1.55		1.01478e-05	57	0.00141784
sp|Q9JM55|TOB2_MOUSE	Tob2	Protein Tob2 OS=Mus musculus GN=Tob2 PE=2 SV=1	1	5.98922	6.16414	6.24218	15.795	14.5141	14.9999		15.103	6.13185		0.646644	0.129535		0.406002		-1.30044		9.61883e-06	54	0.0014186
sp|Q9CPX6|ATG3_MOUSE	Atg3	Ubiquitin-like-conjugating enzyme ATG3 OS=Mus musculus GN=Atg3 PE=1 SV=1	11	17.5143	17.5818	18.3208	9.60946	8.59185	8.97119		9.0575	17.8056		0.514266	0.447422		1.96584		0.975149		1.21239e-05	68	0.00141993
sp|Q6ZPF4|FMNL3_MOUSE	Fmnl3	Formin-like protein 3 OS=Mus musculus GN=Fmnl3 PE=2 SV=2	12	6.12779	7.08769	7.04758	14.4529	14.3032	14.1881		14.3147	6.75435		0.132776	0.54299		0.471846		-1.08361		9.84142e-06	55	0.00142504
sp|Q9DC71|RT15_MOUSE	Mrps15	28S ribosomal protein S15, mitochondrial OS=Mus musculus GN=Mrps15 PE=2 SV=2	8	6.15355	6.42399	7.12894	15.8786	15.6245	16.5459		16.0163	6.56883		0.475891	0.503567		0.410133		-1.28584		9.52826e-06	53	0.00143176
sp|Q5SVQ0-2|MYST2_MOUSE	Myst2	Isoform 2 of Histone acetyltransferase MYST2 OS=Mus musculus GN=Myst2	6	7.5613	7.04819	7.02284	17.1166	17.1068	16.0859		16.7698	7.21078		0.592266	0.303827		0.429987		-1.21764		7.75441e-06	43	0.00143619
sp|Q3U5F4|YRDC_MOUSE	Yrdc	YrdC domain-containing protein, mitochondrial OS=Mus musculus GN=Yrdc PE=1 SV=1	4	4.1834	4.47244	4.99838	20.8346	18.7863	19.6643		19.7617	4.55141		1.02762	0.413189		0.230314		-2.11833		9.26235e-06	51	0.00144638
sp|P01831|THY1_MOUSE	Thy1	Thy-1 membrane glycoprotein OS=Mus musculus GN=Thy1 PE=1 SV=1	6	0.13962	0.317616	0.143114	8.49088	9.0705	7.87618		8.47919	0.200117		0.597246	0.101772		0.0236009		-5.40501		9.44662e-06	52	0.00144679
sp|P97445|CAC1A_MOUSE	Cacna1a	Voltage-dependent P/Q-type calcium channel subunit alpha-1A OS=Mus musculus GN=Cacna1a PE=1 SV=2	3	3.37079	2.30591	4.16147	21.4686	23.1255	20.7908		21.795	3.27939		1.20108	0.93115		0.150465		-2.7325		1.49053e-05	82	0.00144764
sp|Q9CQL4|RM20_MOUSE	Mrpl20	39S ribosomal protein L20, mitochondrial OS=Mus musculus GN=Mrpl20 PE=1 SV=1	5	5.23809	5.12712	4.95618	16.9945	17.3901	16.4285		16.9377	5.10713		0.48331	0.142014		0.301524		-1.72965		1.09129e-06	6	0.00144851
sp|Q9D7S7-2|RL22L_MOUSE	Rpl22l1	Isoform 2 of 60S ribosomal protein L22-like 1 OS=Mus musculus GN=Rpl22l1	4	27.7749	24.2519	25.0522	1.69385	1.66559	2.71087		2.02344	25.693		0.595502	1.84685		12.6977		3.6665		1.48354e-05	81	0.00145863
sp|Q9DB40|MED27_MOUSE	Med27	Mediator of RNA polymerase II transcription subunit 27 OS=Mus musculus GN=Med27 PE=2 SV=2	7	5.72688	6.66527	7.03696	16.5065	16.1453	17.0185		16.5568	6.47637		0.438765	0.675159		0.391162		-1.35416		1.33801e-05	73	0.00145972
sp|O54864-2|SUV91_MOUSE	Suv39h1	Isoform 2 of Histone-lysine N-methyltransferase SUV39H1 OS=Mus musculus GN=Suv39h1	4	5.58949	4.79035	4.38153	20.2084	19.1371	21.2382		20.1946	4.92046		1.05062	0.6144		0.243653		-2.0371		1.32504e-05	72	0.00146565
sp|Q91WT8-2|RBM47_MOUSE	Rbm47	Isoform 2 of RNA-binding protein 47 OS=Mus musculus GN=Rbm47	2	3.54251	4.455	3.58968	11.4903	11.6086	11.8276		11.6422	3.8624		0.171137	0.513751		0.331759		-1.59179		7.74037e-06	42	0.00146772
sp|Q9EP69|SAC1_MOUSE	Sacm1l	Phosphatidylinositide phosphatase SAC1 OS=Mus musculus GN=Sacm1l PE=2 SV=1	34	14.5924	14.5516	14.7312	11.1803	11.4896	11.0453		11.2384	14.6251		0.227777	0.0941508		1.30135		0.380007		9.24145e-06	50	0.00147198
sp|Q9EPA7|NMNA1_MOUSE	Nmnat1	Nicotinamide mononucleotide adenylyltransferase 1 OS=Mus musculus GN=Nmnat1 PE=1 SV=2	3	4.55608	3.67505	4.06316	16.272	16.6934	17.2723		16.7459	4.0981		0.502212	0.441553		0.244722		-2.03078		2.58882e-06	14	0.00147267
sp|Q8BX80|ENASE_MOUSE	Engase	Cytosolic endo-beta-N-acetylglucosaminidase OS=Mus musculus GN=Engase PE=2 SV=1	1	19.3918	20.6118	21.1479	5.18767	6.7248	5.81839		5.91029	20.3838		0.772675	0.899971		3.44887		1.78613		1.48148e-05	80	0.00147482
sp|P02340|P53_MOUSE	Tp53	Cellular tumor antigen p53 OS=Mus musculus GN=Tp53 PE=1 SV=3	17	0.819332	0.681118	0.889082	20.839	22.4971	22.0024		21.7795	0.796511		0.851227	0.105844		0.0365716		-4.77313		9.27483e-07	5	0.0014773
sp|Q69ZN6-2|GNPTA_MOUSE	Gnptab	Isoform 2 of N-acetylglucosamine-1-phosphotransferase subunits alpha/beta OS=Mus musculus GN=Gnptab	4	18.0996	18.9572	18.7419	7.63859	8.67461	9.03528		8.44949	18.5996		0.725047	0.446165		2.20126		1.13833		1.62416e-05	87	0.00148676
sp|Q8BYH3|TRM13_MOUSE	Ccdc76	tRNA guanosine-2'-O-methyltransferase TRM13 homolog OS=Mus musculus GN=Ccdc76 PE=2 SV=1	2	2.64841	1.99208	2.52051	7.97592	8.6309	8.68668		8.43117	2.387		0.39524	0.347938		0.283116		-1.82053		1.88829e-05	101	0.00148894
sp|Q91YI4-2|ARRB2_MOUSE	Arrb2	Isoform 2 of Beta-arrestin-2 OS=Mus musculus GN=Arrb2	4	6.35551	5.34706	6.84293	18.3396	17.242	18.1303		17.904	6.18183		0.582753	0.762909		0.345277		-1.53417		1.47748e-05	79	0.00148945
sp|Q80UY1|CI041_MOUSE		UPF0586 protein C9orf41 homolog OS=Mus musculus PE=2 SV=1	6	8.95193	9.41634	9.93418	15.6351	15.7183	15.4424		15.5986	9.43415		0.141525	0.491367		0.604807		-0.725452		1.55431e-05	83	0.00149139
sp|Q8BG30|NELFA_MOUSE	Whsc2	Negative elongation factor A OS=Mus musculus GN=Whsc2 PE=1 SV=1	11	10.857	10.7362	11.1307	13.6579	13.8809	13.6762		13.7383	10.908		0.123805	0.202128		0.79398		-0.332825		1.61431e-05	86	0.00149492
sp|Q62447|CCNC_MOUSE	Ccnc	Cyclin-C OS=Mus musculus GN=Ccnc PE=2 SV=3	2	5.59185	6.99605	6.82488	16.3922	17.0545	16.6991		16.7153	6.47093		0.331446	0.766098		0.387127		-1.36912		1.44788e-05	77	0.00149752
sp|Q8K2C8|GPAT4_MOUSE	Agpat6	Glycerol-3-phosphate acyltransferase 4 OS=Mus musculus GN=Agpat6 PE=2 SV=1	7	9.48923	10.1463	10.017	17.1493	16.508	16.6921		16.7831	9.88418		0.3302	0.34809		0.588935		-0.763819		7.7143e-06	41	0.00149846
sp|P63087-2|PP1G_MOUSE	Ppp1cc	Isoform Gamma-2 of Serine/threonine-protein phosphatase PP1-gamma catalytic subunit OS=Mus musculus GN=Ppp1cc	8	6.72915	6.9667	7.69586	16.3075	16.5395	15.4171		16.088	7.13057		0.592511	0.503758		0.443222		-1.1739		1.86287e-05	99	0.00149857
sp|Q8BPM2|M4K5_MOUSE	Map4k5	Mitogen-activated protein kinase kinase kinase kinase 5 OS=Mus musculus GN=Map4k5 PE=2 SV=2	20	15.8508	14.8003	15.3755	7.30316	8.11155	7.79553		7.73675	15.3422		0.407388	0.526041		1.98303		0.987706		1.91963e-05	102	0.00149881
sp|Q8BGY9|SC5A7_MOUSE	Slc5a7	High affinity choline transporter 1 OS=Mus musculus GN=Slc5a7 PE=1 SV=1	1	0.1712	0	0.398992	31.9178	35.3523	30.0704		32.4468	0.190064		2.6804	0.200164		0.00585771		-7.41545		1.58252e-05	84	0.00150038
sp|Q9WUM4|COR1C_MOUSE	Coro1c	Coronin-1C OS=Mus musculus GN=Coro1c PE=1 SV=2	23	7.83531	6.75414	7.40848	15.5716	16.1045	15.6622		15.7794	7.33264		0.285137	0.54456		0.464696		-1.10564		9.23963e-06	49	0.00150172
sp|Q91VN6|DDX41_MOUSE	Ddx41	Probable ATP-dependent RNA helicase DDX41 OS=Mus musculus GN=Ddx41 PE=1 SV=2	13	9.69687	9.48772	9.49415	15.3638	14.8655	15.3364		15.1886	9.55958		0.280119	0.11894		0.629393		-0.667967		2.82938e-06	15	0.00150221
sp|P61327|MGN_MOUSE	Magoh	Protein mago nashi homolog OS=Mus musculus GN=Magoh PE=2 SV=1	12	6.60987	6.63819	7.04994	18.8238	17.0686	17.4302		17.7742	6.766		0.926787	0.246307		0.380664		-1.39341		1.88766e-05	100	0.00150333
sp|Q9WUJ8|ORC6_MOUSE	Orc6	Origin recognition complex subunit 6 OS=Mus musculus GN=Orc6 PE=1 SV=1	2	5.04584	4.14183	4.9759	19.3194	21.6617	20.9667		20.6493	4.72119		1.20298	0.502958		0.228637		-2.12887		1.47486e-05	78	0.00150587
tr|Q8CIH9|Q8CIH9_MOUSE	Ppat	Amidophosphoribosyltransferase OS=Mus musculus GN=Ppat PE=2 SV=1	22	7.27385	6.32161	5.87584	15.8737	15.2126	15.8206		15.6356	6.49043		0.367318	0.714132		0.415105		-1.26845		1.94847e-05	103	0.00150657
sp|Q80UU2|RPP38_MOUSE	Rpp38	Ribonuclease P protein subunit p38 OS=Mus musculus GN=Rpp38 PE=2 SV=1	5	6.16908	6.91876	6.85016	14.2394	15.3224	14.8414		14.8011	6.646		0.542625	0.414447		0.449022		-1.15514		1.61285e-05	85	0.00151114
sp|Q8BGR2|LRC8D_MOUSE	Lrrc8d	Leucine-rich repeat-containing protein 8D OS=Mus musculus GN=Lrrc8d PE=2 SV=1	4	0.948715	1.36098	1.36551	17.2734	20.0149	19.8088		19.0324	1.22507		1.52679	0.23934		0.0643676		-3.95752		1.85976e-05	98	0.00151134
sp|P58064|RT06_MOUSE	Mrps6	28S ribosomal protein S6, mitochondrial OS=Mus musculus GN=Mrps6 PE=2 SV=3	8	5.95485	6.25429	5.65122	16.556	15.1054	16.1545		15.9386	5.95345		0.749005	0.301537		0.373523		-1.42073		1.40468e-05	74	0.00151174
sp|Q61193|RGL2_MOUSE	Rgl2	Ral guanine nucleotide dissociation stimulator-like 2 OS=Mus musculus GN=Rgl2 PE=1 SV=2	2	17.0417	16.646	17.3664	10.3493	10.1271	10.8929		10.4564	17.018		0.39398	0.360783		1.62752		0.702673		1.44321e-05	76	0.00151234
sp|Q9Z223-1|MOC2B_MOUSE	Mocs2	Isoform 2 of Molybdopterin synthase catalytic subunit OS=Mus musculus GN=Mocs2	1	4.90657	6.69189	5.77335	19.3914	20.2182	18.681		19.4302	5.7906		0.769334	0.892785		0.298021		-1.74652		1.82755e-05	96	0.0015161
sp|Q9CQF0|RM11_MOUSE	Mrpl11	39S ribosomal protein L11, mitochondrial OS=Mus musculus GN=Mrpl11 PE=2 SV=1	5	6.49308	6.99822	7.87133	16.5066	15.9155	16.6633		16.3618	7.12088		0.394368	0.697264		0.435214		-1.2002		1.85126e-05	97	0.00151994
sp|Q9CRA8|EXOS5_MOUSE	Exosc5	Exosome complex component RRP46 OS=Mus musculus GN=Exosc5 PE=1 SV=1	6	8.86935	8.57549	8.92704	14.2621	15.2446	14.8448		14.7838	8.79063		0.494079	0.188533		0.594611		-0.749982		1.9862e-05	104	0.00152097
sp|Q3TJD7|PDLI7_MOUSE	Pdlim7	PDZ and LIM domain protein 7 OS=Mus musculus GN=Pdlim7 PE=2 SV=1	31	9.20768	8.36902	8.57273	13.5622	13.9039	13.9492		13.8051	8.71648		0.211573	0.437419		0.631395		-0.663384		2.7159e-05	142	0.0015232
sp|Q61072|ADAM9_MOUSE	Adam9	Disintegrin and metalloproteinase domain-containing protein 9 OS=Mus musculus GN=Adam9 PE=1 SV=2	15	16.4349	17.4638	17.9026	8.79891	8.36957	8.00354		8.39067	17.2671		0.398105	0.753362		2.05789		1.04117		2.77337e-05	145	0.00152325
sp|Q8VEB2|SAV1_MOUSE	Sav1	Protein salvador homolog 1 OS=Mus musculus GN=Sav1 PE=1 SV=2	5	20.1766	20.0269	18.7102	7.42788	7.50893	7.01252		7.31644	19.6379		0.266307	0.806891		2.68408		1.42443		7.45967e-06	39	0.0015233
sp|Q9Z2D3|DFNA5_MOUSE	Dfna5	Non-syndromic hearing impairment protein 5 homolog OS=Mus musculus GN=Dfna5 PE=2 SV=1	5	3.07984	2.45677	3.39322	16.8413	17.4066	19.4007		17.8829	2.97661		1.34453	0.476683		0.16645		-2.58684		2.73992e-05	143	0.00152592
tr|D3Z4Z0|D3Z4Z0_MOUSE	Tada2b	MCG49644 OS=Mus musculus GN=Tada2b PE=4 SV=1	2	8.93773	8.44686	9.46393	16.5228	16.3428	16.5745		16.48	8.94951		0.121626	0.508637		0.543051		-0.880839		7.67126e-06	40	0.00152735
sp|Q9EQW7|KI13A_MOUSE	Kif13a	Kinesin-like protein KIF13A OS=Mus musculus GN=Kif13a PE=1 SV=1	3	18.4939	19.7828	18.2658	9.22828	8.75127	8.88752		8.95569	18.8475		0.245703	0.817983		2.10453		1.0735		1.82233e-05	95	0.00152768
sp|Q6PGB6-2|NAA50_MOUSE	Naa50	Isoform 2 of N-alpha-acetyltransferase 50, NatE catalytic subunit OS=Mus musculus GN=Naa50	12	7.28341	6.4462	7.62887	15.2019	15.9837	15.2531		15.4796	7.11949		0.437342	0.608135		0.459928		-1.12052		2.1106e-05	110	0.00152807
sp|Q99K74|MED24_MOUSE	Med24	Mediator of RNA polymerase II transcription subunit 24 OS=Mus musculus GN=Med24 PE=1 SV=1	9	7.71142	7.42532	8.2359	15.3778	16.2691	15.0804		15.5758	7.79088		0.618583	0.411091		0.500192		-0.999445		2.70675e-05	141	0.00152883
sp|Q06180-2|PTN2_MOUSE	Ptpn2	Isoform PTPA of Tyrosine-protein phosphatase non-receptor type 2 OS=Mus musculus GN=Ptpn2	11	7.49204	7.04656	7.48236	14.044	13.5309	14.5682		14.0477	7.34032		0.51866	0.25445		0.522528		-0.936419		1.80464e-05	94	0.00152895
sp|Q61387|COX7R_MOUSE	Cox7a2l	Cytochrome c oxidase subunit 7A-related protein, mitochondrial OS=Mus musculus GN=Cox7a2l PE=2 SV=1	3	3.04299	3.51034	3.14669	11.2636	11.108	12.2693		11.547	3.23334		0.630378	0.245429		0.280016		-1.83642		1.43995e-05	75	0.00152904
sp|Q80TZ9|RERE_MOUSE	Rere	Arginine-glutamic acid dipeptide repeats protein OS=Mus musculus GN=Rere PE=1 SV=3	4	6.03137	5.61186	6.31324	18.2899	17.4618	16.2578		17.3365	5.98549		1.02183	0.352934		0.345254		-1.53427		2.68806e-05	140	0.00152912
sp|P97480-2|EYA3_MOUSE	Eya3	Isoform 2 of Eyes absent homolog 3 OS=Mus musculus GN=Eya3	4	8.22586	8.60272	8.22303	17.4327	16.2174	16.3009		16.6503	8.35054		0.678834	0.218402		0.501524		-0.99561		1.78701e-05	93	0.00153029
sp|Q9CSU0-2|RPR1B_MOUSE	Rprd1b	Isoform 2 of Regulation of nuclear pre-mRNA domain-containing protein 1B OS=Mus musculus GN=Rprd1b	1	7.26243	7.45162	8.41179	16.0878	17.069	16.137		16.4313	7.70861		0.552841	0.616272		0.469143		-1.0919		2.65191e-05	138	0.00153042
sp|Q8R0S2-2|IQEC1_MOUSE	Iqsec1	Isoform 2 of IQ motif and SEC7 domain-containing protein 1 OS=Mus musculus GN=Iqsec1	14	18.1987	18.819	18.0106	10.0139	8.8464	8.77213		9.21081	18.3428		0.696487	0.423018		1.99144		0.993811		2.07665e-05	108	0.00153134
sp|Q8CHH9-2|SEPT8_MOUSE	2014-09-08	Isoform 2 of Septin-8 OS=Mus musculus GN=Sept8	16	17.1429	18.8891	18.6186	7.68546	8.13357	7.43561		7.75155	18.2169		0.353642	0.939865		2.35009		1.23272		2.7689e-05	144	0.00153136
sp|Q66JT1|LRC8E_MOUSE	Lrrc8e	Leucine-rich repeat-containing protein 8E OS=Mus musculus GN=Lrrc8e PE=2 SV=2	3	5.81397	4.27383	4.19207	15.9558	17.2792	16.8275		16.6875	4.75996		0.672716	0.913717		0.285241		-1.80975		2.67569e-05	139	0.00153304
sp|Q3THK7|GUAA_MOUSE	Gmps	GMP synthase [glutamine-hydrolyzing] OS=Mus musculus GN=Gmps PE=1 SV=2	45	7.12673	5.95484	6.63679	18.6391	17.8343	17.0051		17.8262	6.57279		0.81703	0.588561		0.368716		-1.43942		2.09935e-05	109	0.00153388
tr|E9Q6C7|E9Q6C7_MOUSE	Lphn2	Uncharacterized protein OS=Mus musculus GN=Lphn2 PE=3 SV=1	14	17.8695	17.3416	17.5028	7.34887	6.45976	5.95938		6.58934	17.5713		0.703749	0.270534		2.66663		1.41502		7.32843e-06	38	0.00153589
sp|Q9D0I8|MRT4_MOUSE	Mrto4	mRNA turnover protein 4 homolog OS=Mus musculus GN=Mrto4 PE=2 SV=1	17	5.26717	4.67573	5.19392	16.5353	16.4201	17.7586		16.9047	5.04561		0.741768	0.32241		0.298474		-1.74432		7.13805e-06	37	0.00153642
sp|Q8R5A3|AB1IP_MOUSE	Apbb1ip	Amyloid beta A4 precursor protein-binding family B member 1-interacting protein OS=Mus musculus GN=Apbb1ip PE=1 SV=2	11	4.3647	3.40844	4.74462	12.2111	11.9674	11.9763		12.0516	4.17259		0.138203	0.688495		0.346227		-1.53021		2.0667e-05	107	0.00153824
sp|Q9WV95|PHLA3_MOUSE	Phlda3	Pleckstrin homology-like domain family A member 3 OS=Mus musculus GN=Phlda3 PE=1 SV=1	3	27.2164	28.2751	24.0822	4.01035	3.91896	3.62655		3.85195	26.5246		0.200482	2.18038		6.886		2.78367		2.84034e-05	147	0.00153881
sp|Q7TPD0|INT3_MOUSE	Ints3	Integrator complex subunit 3 OS=Mus musculus GN=Ints3 PE=1 SV=2	14	9.31192	8.69678	9.29723	14.092	14.7244	14.4342		14.4169	9.10198		0.316556	0.350987		0.631342		-0.663506		2.04868e-05	106	0.00153921
sp|Q62377|U2AFM_MOUSE	Zrsr2	U2 small nuclear ribonucleoprotein auxiliary factor 35 kDa subunit-related protein 2 OS=Mus musculus GN=Zrsr2 PE=2 SV=1	2	7.20423	5.7989	5.66783	17.2049	16.1841	16.9022		16.7637	6.22365		0.524298	0.851729		0.371257		-1.42951		2.64941e-05	137	0.00154014
sp|Q80X85|RT07_MOUSE	Mrps7	28S ribosomal protein S7, mitochondrial OS=Mus musculus GN=Mrps7 PE=2 SV=1	5	5.89735	5.81968	5.58583	15.4604	16.922	15.2019		15.8614	5.76762		0.927527	0.162154		0.363625		-1.45948		2.47606e-05	128	0.00154058
sp|Q80WR5|CA174_MOUSE		UPF0688 protein C1orf174 homolog OS=Mus musculus PE=1 SV=1	2	8.27471	8.13904	7.26327	20.7953	19.5462	18.8764		19.7393	7.89234		0.973915	0.548998		0.399829		-1.32255		2.59216e-05	134	0.00154059
sp|Q922R8|PDIA6_MOUSE	Pdia6	Protein disulfide-isomerase A6 OS=Mus musculus GN=Pdia6 PE=1 SV=3	27	18.0922	19.3278	19.3523	7.96544	8.27649	9.25484		8.49892	18.9241		0.672864	0.720551		2.22665		1.15487		2.61361e-05	135	0.00154184
sp|Q9JKK8|ATR_MOUSE	Atr	Serine/threonine-protein kinase ATR OS=Mus musculus GN=Atr PE=1 SV=2	11	10.0394	9.32003	9.33045	14.5853	14.491	14.3957		14.4907	9.56329		0.0948004	0.412353		0.659962		-0.599545		1.78299e-05	92	0.00154345
sp|Q8QZV7|M89BB_MOUSE		Cell cycle regulator Mat89Bb homolog OS=Mus musculus PE=2 SV=2	15	9.20549	8.80107	9.66681	15.9243	15.288	16.1156		15.776	9.22446		0.433281	0.433182		0.584716		-0.774193		2.50069e-05	129	0.00154383
sp|Q8R3Y8-2|I2BP1_MOUSE	Irf2bp1	Isoform 2 of Interferon regulatory factor 2-binding protein 1 OS=Mus musculus GN=Irf2bp1	8	8.56503	7.69199	8.87307	15.8415	16.5725	15.9157		16.1099	8.3767		0.402338	0.61265		0.519972		-0.943494		2.63704e-05	136	0.00154422
sp|Q8BI06|K1199_MOUSE		Protein KIAA1199 homolog OS=Mus musculus PE=2 SV=4	13	28.3449	31.7217	28.0335	2.65839	4.86289	1.99695		3.17274	29.3667		1.50061	2.04542		9.25593		3.21038		2.87245e-05	148	0.00154569
sp|P35822|PTPRK_MOUSE	Ptprk	Receptor-type tyrosine-protein phosphatase kappa OS=Mus musculus GN=Ptprk PE=1 SV=1	15	6.96983	7.25403	7.97031	20.4296	22.4323	20.7972		21.2197	7.39806		1.06611	0.515556		0.348641		-1.52019		1.76734e-05	91	0.00154671
sp|Q6P6L0-3|FIL1L_MOUSE	Filip1l	Isoform 3 of Filamin A-interacting protein 1-like OS=Mus musculus GN=Filip1l	22	1.37052	0.4983	1.52691	24.4969	24.6656	22.7436		23.9687	1.13191		1.06432	0.554266		0.0472245		-4.40432		2.52575e-06	13	0.00154731
sp|Q9DBJ3|BI2L1_MOUSE	Baiap2l1	Brain-specific angiogenesis inhibitor 1-associated protein 2-like protein 1 OS=Mus musculus GN=Baiap2l1 PE=1 SV=1	14	22.5652	20.2429	22.0539	8.79869	8.29052	8.79074		8.62665	21.6207		0.291124	1.22026		2.50626		1.32554		2.83698e-05	146	0.00154752
sp|Q8BHC1|RB39B_MOUSE	Rab39b	Ras-related protein Rab-39B OS=Mus musculus GN=Rab39b PE=2 SV=1	4	5.69499	6.03264	6.23076	14.7249	13.6596	13.5298		13.9714	5.98613		0.655741	0.270896		0.428455		-1.22278		2.04139e-05	105	0.00154834
sp|Q6ZPR5|NSMA3_MOUSE	Smpd4	Sphingomyelin phosphodiesterase 4 OS=Mus musculus GN=Smpd4 PE=2 SV=2	15	6.59202	8.2231	7.64991	16.8526	16.469	17.0397		16.7871	7.48834		0.290934	0.827456		0.446077		-1.16463		2.58739e-05	133	0.00154932
sp|Q9WTP6-2|KAD2_MOUSE	Ak2	Isoform 2 of Adenylate kinase 2, mitochondrial OS=Mus musculus GN=Ak2	24	4.47397	5.01727	4.97389	17.7049	19.1706	17.6956		18.1904	4.82171		0.84892	0.301932		0.265069		-1.91556		6.80901e-06	35	0.00154934
sp|Q9WV30|NFAT5_MOUSE	Nfat5	Nuclear factor of activated T-cells 5 OS=Mus musculus GN=Nfat5 PE=2 SV=1	14	6.23686	4.88558	5.59636	19.1774	21.7053	20.2532		20.3786	5.57293		1.26861	0.675945		0.273469		-1.87055		2.90065e-05	149	0.00155039
tr|Q8K354|Q8K354_MOUSE	Cbr3	Carbonyl reductase 3 OS=Mus musculus GN=Cbr3 PE=2 SV=1	8	19.0525	21.3543	20.9053	6.06579	6.09805	5.78154		5.98179	20.4374		0.174173	1.22016		3.4166		1.77256		1.73357e-05	89	0.00155126
sp|Q62415|ASPP1_MOUSE	Ppp1r13b	Apoptosis-stimulating of p53 protein 1 OS=Mus musculus GN=Ppp1r13b PE=1 SV=2	6	16.0099	15.7364	15.8133	10.1077	9.00698	9.76537		9.62668	15.8532		0.563313	0.141048		1.6468		0.719663		2.47381e-05	127	0.00155129
sp|Q8BQM4|HEAT3_MOUSE	Heatr3	HEAT repeat-containing protein 3 OS=Mus musculus GN=Heatr3 PE=2 SV=1	20	9.18211	9.0673	8.89171	15.7299	15.1141	16.2008		15.6816	9.04704		0.544958	0.146256		0.576921		-0.793555		1.71611e-05	88	0.00155308
sp|Q03141-2|MARK3_MOUSE	Mark3	Isoform 2 of MAP/microtubule affinity-regulating kinase 3 OS=Mus musculus GN=Mark3	11	15.211	15.163	14.7006	8.86946	9.06662	9.40281		9.11296	15.0249		0.269678	0.281847		1.64874		0.72136		6.25753e-06	32	0.00155734
sp|Q69ZH9|RHG23_MOUSE	Arhgap23	Rho GTPase-activating protein 23 OS=Mus musculus GN=Arhgap23 PE=1 SV=2	6	16.5509	17.7436	17.1806	9.65843	9.60615	9.15442		9.473	17.1584		0.277134	0.596661		1.81129		0.857019		1.76105e-05	90	0.00155833
tr|D3YVW2|D3YVW2_MOUSE	Golim4	Uncharacterized protein OS=Mus musculus GN=Golim4 PE=4 SV=1	19	17.8291	16.7155	16.9229	8.44706	9.27267	9.17412		8.96462	17.1558		0.450918	0.592216		1.91373		0.936385		2.23177e-05	114	0.00155911
sp|Q9D868-2|PPIH_MOUSE	Ppih	Isoform 2 of Peptidyl-prolyl cis-trans isomerase H OS=Mus musculus GN=Ppih	10	6.78987	4.85597	5.29508	19.4721	18.0496	18.8498		18.7905	5.64697		0.713102	1.01384		0.300523		-1.73445		2.58519e-05	132	0.00155973
sp|Q7TSY8|SGOL2_MOUSE	Sgol2	Shugoshin-like 2 OS=Mus musculus GN=Sgol2 PE=1 SV=1	8	9.77897	9.92604	9.93101	15.3286	14.739	14.4634		14.8437	9.87867		0.441994	0.0863814		0.665514		-0.587458		2.2158e-05	113	0.00156165
sp|Q2MV57-2|TECT2_MOUSE	Tctn2	Isoform 2 of Tectonic-2 OS=Mus musculus GN=Tctn2	1	18.6908	19.9445	19.729	7.87948	9.427	8.08821		8.4649	19.4548		0.839717	0.670331		2.29829		1.20056		2.98197e-05	152	0.00156239
sp|Q9QZH3|PPIE_MOUSE	Ppie	Peptidyl-prolyl cis-trans isomerase E OS=Mus musculus GN=Ppie PE=2 SV=2	9	9.11972	7.76966	8.82568	15.8203	16.03	15.9814		15.9439	8.57169		0.109764	0.709965		0.537615		-0.895354		2.94335e-05	150	0.00156272
sp|Q9R117|TYK2_MOUSE	Tyk2	Non-receptor tyrosine-protein kinase TYK2 OS=Mus musculus GN=Tyk2 PE=1 SV=2	3	16.7146	16.3103	15.9047	10.2142	10.4802	9.67366		10.1227	16.3099		0.410984	0.40495		1.61122		0.688153		2.47269e-05	126	0.0015629
sp|Q7TQK1|INT7_MOUSE	Ints7	Integrator complex subunit 7 OS=Mus musculus GN=Ints7 PE=1 SV=1	14	8.8049	9.65557	9.67168	14.6883	14.9553	14.874		14.8392	9.37738		0.13686	0.495851		0.631933		-0.662156		2.57153e-05	131	0.00156334
sp|Q91YM2|RHG35_MOUSE	Arhgap35	Rho GTPase-activating protein 35 OS=Mus musculus GN=Arhgap35 PE=1 SV=3	21	15.833	15.0943	15.6012	9.66787	9.50706	9.39839		9.52444	15.5095		0.135578	0.377791		1.62839		0.703446		6.67587e-06	34	0.00156373
sp|Q9Z280-2|PLD1_MOUSE	Pld1	Isoform PLD1B of Phospholipase D1 OS=Mus musculus GN=Pld1	5	18.4146	17.737	17.3062	7.86403	7.72618	7.12822		7.57281	17.8193		0.391147	0.558761		2.35306		1.23454		6.48062e-06	33	0.00156399
sp|Q3UH68-2|LIMC1_MOUSE	Limch1	Isoform 2 of LIM and calponin homology domains-containing protein 1 OS=Mus musculus GN=Limch1	5	16.0002	16.7848	14.5233	3.5932	3.20552	3.25741		3.35204	15.7694		0.210453	1.14828		4.70442		2.23402		2.55362e-05	130	0.00156439
sp|Q62470-2|ITA3_MOUSE	Itga3	Isoform Alpha-3B of Integrin alpha-3 OS=Mus musculus GN=Itga3	13	10.2169	9.20371	10.215	23.4985	21.6145	23.1932		22.7687	9.87854		1.01118	0.584418		0.433864		-1.20468		2.20603e-05	112	0.00156864
sp|P16546-2|SPTA2_MOUSE	Sptan1	Isoform 2 of Spectrin alpha chain, brain OS=Mus musculus GN=Sptan1	243	19.0053	18.2298	18.7217	8.08131	7.69215	7.4988		7.75742	18.6523		0.296689	0.392385		2.40444		1.2657		1.37919e-06	7	0.00156913
sp|Q8VI33|TAF9_MOUSE	Taf9	Transcription initiation factor TFIID subunit 9 OS=Mus musculus GN=Taf9 PE=2 SV=1	7	6.20926	7.77038	7.48556	16.9283	17.4128	16.469		16.9367	7.15507		0.471956	0.83138		0.422459		-1.24312		2.97784e-05	151	0.00157057
sp|Q00915|RET1_MOUSE	Rbp1	Retinol-binding protein 1 OS=Mus musculus GN=Rbp1 PE=2 SV=2	8	0.853632	1.05116	1.25151	7.22206	8.15865	8.36108		7.91393	1.0521		0.607666	0.198941		0.132943		-2.91112		2.46537e-05	125	0.00157073
sp|P97927|LAMA4_MOUSE	Lama4	Laminin subunit alpha-4 OS=Mus musculus GN=Lama4 PE=1 SV=2	3	20.3873	18.0513	17.9943	2.87091	3.6614	2.05466		2.86232	18.811		0.803404	1.36544		6.57192		2.71632		3.17563e-05	161	0.00157085
sp|Q3TX08|TRM1_MOUSE	Trmt1	N(2),N(2)-dimethylguanosine tRNA methyltransferase OS=Mus musculus GN=Trmt1 PE=1 SV=2	6	7.28289	7.1217	7.07938	13.166	14.3528	14.2716		13.9301	7.16132		0.663003	0.107385		0.514089		-0.959911		3.16185e-05	160	0.00157381
sp|Q9JHU4|DYHC1_MOUSE	Dync1h1	Cytoplasmic dynein 1 heavy chain 1 OS=Mus musculus GN=Dync1h1 PE=1 SV=2	322	16.9985	16.8116	16.938	9.35308	8.42758	9.82317		9.20128	16.916		0.710071	0.0953667		1.83844		0.878485		2.43247e-05	123	0.00157498
sp|Q8BTI7|ANR52_MOUSE	Ankrd52	Serine/threonine-protein phosphatase 6 regulatory ankyrin repeat subunit C OS=Mus musculus GN=Ankrd52 PE=2 SV=1	10	9.56471	9.3716	9.24942	13.7967	14.24	14.3145		14.1171	9.39524		0.279935	0.158969		0.665524		-0.587438		7.12818e-06	36	0.00157691
sp|Q9CWV0|CG030_MOUSE		Uncharacterized protein C7orf30 homolog OS=Mus musculus PE=2 SV=1	2	5.0642	6.01759	4.85773	16.3278	17.3432	15.7662		16.4791	5.31317		0.799308	0.618716		0.32242		-1.63299		2.1983e-05	111	0.00157723
sp|Q80WW9|DDRGK_MOUSE	Ddrgk1	DDRGK domain-containing protein 1 OS=Mus musculus GN=Ddrgk1 PE=1 SV=2	4	16.2391	17.1994	17.1532	9.34783	9.56306	10.2256		9.71216	16.8639		0.457486	0.541586		1.73637		0.796074		3.14969e-05	159	0.00157762
sp|Q62083|PICK1_MOUSE	Pick1	PRKCA-binding protein OS=Mus musculus GN=Pick1 PE=1 SV=2	2	8.28335	9.66393	9.1485	16.1484	16.5847	16.3019		16.345	9.03193		0.22132	0.697633		0.55258		-0.855744		3.27097e-05	165	0.00157879
sp|P97315|CSRP1_MOUSE	Csrp1	Cysteine and glycine-rich protein 1 OS=Mus musculus GN=Csrp1 PE=1 SV=3	16	4.23557	3.29253	4.34322	20.3205	17.862	19.8476		19.3434	3.95711		1.30451	0.578052		0.204572		-2.28932		2.4188e-05	122	0.00157896
sp|Q8BWZ3|NAA25_MOUSE	Naa25	N-alpha-acetyltransferase 25, NatB auxiliary subunit OS=Mus musculus GN=Naa25 PE=1 SV=1	29	7.29092	6.74808	7.41687	13.4836	13.5397	14.3893		13.8042	7.15196		0.507487	0.355392		0.5181		-0.948697		2.46034e-05	124	0.00158018
sp|P63154|CRNL1_MOUSE	Crnkl1	Crooked neck-like protein 1 OS=Mus musculus GN=Crnkl1 PE=2 SV=1	15	7.66868	7.34913	8.07989	15.6116	17.206	16.4927		16.4368	7.69923		0.79867	0.366337		0.468415		-1.09414		3.33386e-05	168	0.00158041
sp|B1AVH7|TBD2A_MOUSE	Tbc1d2	TBC1 domain family member 2A OS=Mus musculus GN=Tbc1d2 PE=2 SV=1	1	23.2161	25.5644	25.8429	7.43963	5.19856	6.69555		6.44458	24.8745		1.14142	1.44292		3.85975		1.94851		3.23827e-05	163	0.00158218
sp|Q6AZB0-3|BOC_MOUSE	Boc	Isoform 3 of Brother of CDO OS=Mus musculus GN=Boc	1	26.0847	24.7398	28.4818	4.92865	5.17147	3.14402		4.41471	26.4354		1.10713	1.8955		5.98803		2.58208		3.22011e-05	162	0.00158302
sp|Q62158|TRI27_MOUSE	Trim27	Zinc finger protein RFP OS=Mus musculus GN=Trim27 PE=1 SV=2	6	8.23343	8.60593	8.29029	17.4937	18.3081	16.5566		17.4528	8.37655		0.876466	0.200673		0.479955		-1.05903		3.14167e-05	158	0.00158356
sp|Q9R1Z8|VINEX_MOUSE	Sorbs3	Vinexin OS=Mus musculus GN=Sorbs3 PE=1 SV=1	13	18.2061	20.4683	20.0947	7.07638	6.19261	6.26722		6.51207	19.5897		0.490129	1.21271		3.00821		1.58891		3.26294e-05	164	0.00158452
sp|O70293-2|GRK6_MOUSE	Grk6	Isoform GRK6B of G protein-coupled receptor kinase 6 OS=Mus musculus GN=Grk6	8	7.16293	7.15055	6.50385	15.14	16.6067	15.8062		15.851	6.93911		0.734374	0.376997		0.437772		-1.19175		2.40777e-05	121	0.00158475
sp|Q91ZU6-3|DYST_MOUSE	Dst	Isoform 3 of Dystonin OS=Mus musculus GN=Dst	12	5.84699	6.83435	6.49786	12.8353	12.9855	13.5097		13.1102	6.39307		0.354062	0.501952		0.487642		-1.03611		2.28842e-05	115	0.00158478
sp|Q8VC66|ADIP_MOUSE	Ssx2ip	Afadin- and alpha-actinin-binding protein OS=Mus musculus GN=Ssx2ip PE=1 SV=1	1	7.74365	6.7953	6.97436	14.7279	15.741	15.9842		15.4844	7.1711		0.666309	0.503858		0.463119		-1.11055		3.32371e-05	167	0.00158503
sp|P16460|ASSY_MOUSE	Ass1	Argininosuccinate synthase OS=Mus musculus GN=Ass1 PE=1 SV=1	15	29.1409	30.6744	26.3489	3.27244	2.29887	3.93398		3.16843	28.7214		0.822502	2.19305		9.06487		3.18029		2.30971e-05	116	0.00158573
sp|Q80SY5|PR38B_MOUSE	Prpf38b	Pre-mRNA-splicing factor 38B OS=Mus musculus GN=Prpf38b PE=1 SV=1	10	8.32263	6.39229	7.38351	17.0897	17.2439	16.952		17.0952	7.36614		0.146028	0.965287		0.43089		-1.21461		3.30537e-05	166	0.00158578
sp|O88667|RAD_MOUSE	Rrad	GTP-binding protein RAD OS=Mus musculus GN=Rrad PE=1 SV=1	2	4.64432	1.94422	2.85672	21.3353	19.9696	22.3547		21.2199	3.14842		1.19673	1.37348		0.148371		-2.75272		3.36572e-05	169	0.00158607
sp|Q9Z120|TRMB_MOUSE	Mettl1	tRNA (guanine-N(7)-)-methyltransferase OS=Mus musculus GN=Mettl1 PE=2 SV=1	2	6.49118	5.1147	4.35828	17.8653	17.3555	18.597		17.9393	5.32139		0.624046	1.08137		0.296633		-1.75325		3.12692e-05	157	0.00158617
tr|A2A7F4|A2A7F4_MOUSE	Rlf	MCG122876 OS=Mus musculus GN=Rlf PE=4 SV=1	7	6.45556	6.03999	6.08067	17.9605	18.8296	16.6035		17.7979	6.19207		1.12193	0.229091		0.347911		-1.52321		3.09158e-05	155	0.00158847
sp|Q9DCT5|SDF2_MOUSE	Sdf2	Stromal cell-derived factor 2 OS=Mus musculus GN=Sdf2 PE=2 SV=1	9	16.5743	16.7221	17.1012	9.38078	10.4862	9.36742		9.7448	16.7992		0.642106	0.27178		1.72391		0.785688		3.1134e-05	156	0.00158943
sp|Q99J08|S14L2_MOUSE	Sec14l2	SEC14-like protein 2 OS=Mus musculus GN=Sec14l2 PE=2 SV=1	2	18.3223	18.8038	17.6682	11.1224	11.7649	11.6518		11.513	18.2648		0.342992	0.569982		1.58644		0.665795		3.07453e-05	154	0.00158997
sp|Q64364|CD2A2_MOUSE	Cdkn2a	Cyclin-dependent kinase inhibitor 2A, isoform 3 OS=Mus musculus GN=Cdkn2a PE=1 SV=1	6	1.66349	1.35497	1.39945	17.5039	16.8491	14.6547		16.3359	1.47264		1.49232	0.166773		0.0901473		-3.47157		3.39518e-05	170	0.00159054
tr|Q4VBF6|Q4VBF6_MOUSE	Bcl2	B-cell leukemia/lymphoma 2, isoform CRA_b OS=Mus musculus GN=Bcl2 PE=2 SV=1	1	5.6069	3.40288	5.42772	18.7135	19.0365	20.3302		19.3601	4.8125		0.855542	1.22405		0.248579		-2.00823		3.61677e-05	181	0.00159138
sp|Q8R323|RFC3_MOUSE	Rfc3	Replication factor C subunit 3 OS=Mus musculus GN=Rfc3 PE=2 SV=1	7	6.65478	5.68466	4.91501	17.2269	16.4201	15.8745		16.5072	5.75148		0.680391	0.871808		0.348423		-1.52109		3.63942e-05	182	0.00159254
tr|E9Q7X6|E9Q7X6_MOUSE	Heg1	Uncharacterized protein OS=Mus musculus GN=Heg1 PE=4 SV=1	3	23.2437	25.0953	22.407	7.75826	7.5633	6.64577		7.32244	23.582		0.594069	1.37571		3.22051		1.68729		2.36001e-05	118	0.00159281
sp|Q8R1J3|ZCHC9_MOUSE	Zcchc9	Zinc finger CCHC domain-containing protein 9 OS=Mus musculus GN=Zcchc9 PE=2 SV=1	4	7.4429	5.74408	6.88572	16.6764	17.8189	16.8553		17.1169	6.6909		0.614524	0.866004		0.390895		-1.35515		3.50574e-05	175	0.00159541
sp|P62482|KCAB2_MOUSE	Kcnab2	Voltage-gated potassium channel subunit beta-2 OS=Mus musculus GN=Kcnab2 PE=1 SV=1	2	5.11164	6.23591	4.10401	23.8084	26.8808	25.6945		25.4612	5.15052		1.54943	1.06648		0.202289		-2.30551		2.40595e-05	120	0.00159675
tr|A0S860|A0S860_MOUSE	Zfyve9	Uncharacterized protein OS=Mus musculus GN=Zfyve9 PE=2 SV=1	4	10.2875	10.3042	10.7336	15.8512	15.9172	15.1176		15.6287	10.4418		0.443825	0.252873		0.668116		-0.581829		3.06887e-05	153	0.00159742
sp|A2AF47|DOC11_MOUSE	Dock11	Dedicator of cytokinesis protein 11 OS=Mus musculus GN=Dock11 PE=1 SV=1	28	3.10402	2.83702	4.08667	19.9575	19.1621	18.3425		19.154	3.34257		0.80753	0.658093		0.17451		-2.51862		6.2205e-06	31	0.00159807
sp|Q9CPN8|IF2B3_MOUSE	Igf2bp3	Insulin-like growth factor 2 mRNA-binding protein 3 OS=Mus musculus GN=Igf2bp3 PE=1 SV=1	27	6.50155	4.98452	6.34478	14.4947	14.8437	14.2832		14.5405	5.94362		0.283047	0.834293		0.408762		-1.29067		3.59205e-05	179	0.00159816
tr|D3YWZ2|D3YWZ2_MOUSE	Vill	Uncharacterized protein OS=Mus musculus GN=Vill PE=4 SV=1	2	28.9732	25.3162	25.496	3.77021	5.35319	3.4522		4.19187	26.5951		1.01823	2.06143		6.34446		2.6655		3.61273e-05	180	0.00159843
sp|Q9D8V0-4|HM13_MOUSE	Hm13	Isoform 4 of Minor histocompatibility antigen H13 OS=Mus musculus GN=Hm13	8	16.8222	18.2168	17.9162	7.45604	7.34134	8.33949		7.71229	17.6517		0.54619	0.733951		2.28878		1.19458		2.34832e-05	117	0.00159846
sp|P27612|PLAP_MOUSE	Plaa	Phospholipase A-2-activating protein OS=Mus musculus GN=Plaa PE=2 SV=4	35	9.14586	8.58444	8.90283	16.4191	16.4586	16.2831		16.3869	8.87771		0.0920656	0.281552		0.541755		-0.884286		8.04391e-07	4	0.00160154
sp|P97411-2|ICA69_MOUSE	Ica1	Isoform 2 of Islet cell autoantigen 1 OS=Mus musculus GN=Ica1	5	8.36106	8.76697	8.30057	17.281	17.813	18.3818		17.8253	8.4762		0.550503	0.253624		0.475516		-1.07243		5.83427e-06	29	0.00160221
sp|Q9CPX7|RT16_MOUSE	Mrps16	28S ribosomal protein S16, mitochondrial OS=Mus musculus GN=Mrps16 PE=2 SV=1	4	7.60093	6.21032	6.26262	15.3884	15.8106	15.4627		15.5539	6.69129		0.225391	0.788205		0.4302		-1.21692		2.39468e-05	119	0.00160262
tr|Q3TJB1|Q3TJB1_MOUSE	Zmym1	Uncharacterized protein OS=Mus musculus GN=Zmym1 PE=2 SV=1	3	6.66276	6.58889	4.55609	20.7839	19.3317	20.7529		20.2895	5.93591		0.829624	1.19553		0.292561		-1.77319		3.44238e-05	171	0.00160323
sp|P81117|NUCB2_MOUSE	Nucb2	Nucleobindin-2 OS=Mus musculus GN=Nucb2 PE=1 SV=2	20	20.4047	19.4451	20.2115	7.27958	9.41723	8.45934		8.38538	20.0204		1.07074	0.507531		2.38754		1.25552		3.50464e-05	174	0.00160408
sp|Q8VCY6|UTP6_MOUSE	Utp6	U3 small nucleolar RNA-associated protein 6 homolog OS=Mus musculus GN=Utp6 PE=1 SV=1	16	5.37218	5.60406	5.63174	15.7487	15.4863	16.7323		15.9891	5.53599		0.656866	0.14254		0.346235		-1.53017		5.64666e-06	28	0.00160607
sp|Q62351|TFR1_MOUSE	Tfrc	Transferrin receptor protein 1 OS=Mus musculus GN=Tfrc PE=1 SV=1	39	4.26866	2.52482	5.11879	20.1482	19.285	21.3104		20.2479	3.97076		1.01637	1.3224		0.196107		-2.35028		3.59036e-05	178	0.00160638
sp|P08551|NFL_MOUSE	Nefl	Neurofilament light polypeptide OS=Mus musculus GN=Nefl PE=1 SV=5	10	17.101	18.0058	17.7743	7.58619	8.95316	8.9842		8.50785	17.627		0.798332	0.470033		2.07186		1.05092		3.47058e-05	172	0.00160696
sp|Q8BR63|F177A_MOUSE	Fam177a1	Protein FAM177A1 OS=Mus musculus GN=Fam177a1 PE=2 SV=1	7	17.6174	18.0739	18.5788	7.32469	6.72014	7.70381		7.24955	18.09		0.496122	0.480903		2.49533		1.31923		5.45187e-06	27	0.0016081
sp|Q9CQ36|DPOE4_MOUSE	Pole4	DNA polymerase epsilon subunit 4 OS=Mus musculus GN=Pole4 PE=2 SV=1	1	3.7625	5.82175	5.37598	20.2019	19.3053	18.2464		19.2512	4.98674		0.978872	1.0834		0.259035		-1.94878		3.57574e-05	177	0.00160888
sp|Q148V7|K1468_MOUSE	Kiaa1468	LisH domain and HEAT repeat-containing protein KIAA1468 OS=Mus musculus GN=Kiaa1468 PE=1 SV=1	11	17.1598	17.1108	18.5854	8.22295	8.74789	8.94975		8.6402	17.6187		0.375177	0.837574		2.03915		1.02797		3.5561e-05	176	0.00160913
sp|P15327|PMGE_MOUSE	Bpgm	Bisphosphoglycerate mutase OS=Mus musculus GN=Bpgm PE=2 SV=2	4	5.48633	6.41672	6.40466	17.7725	17.0665	19.204		18.0143	6.10257		1.08908	0.533714		0.338762		-1.56166		3.50126e-05	173	0.0016118
sp|Q9QYR6-2|MAP1A_MOUSE	Map1a	Isoform 2 of Microtubule-associated protein 1A OS=Mus musculus GN=Map1a	61	19.2207	19.5137	20.7118	6.3981	5.86617	6.49731		6.25386	19.8154		0.339394	0.790008		3.16851		1.6638		5.33845e-06	26	0.00163521
sp|Q3USJ8-2|FCSD2_MOUSE	Fchsd2	Isoform 2 of FCH and double SH3 domains protein 2 OS=Mus musculus GN=Fchsd2	6	20.5363	23.0298	20.4405	6.88269	5.86774	6.2697		6.34004	21.3355		0.511118	1.46806		3.3652		1.75069		3.75913e-05	183	0.00163594
sp|Q9R1S3-2|PIGN_MOUSE	Pign	Isoform 2 of GPI ethanolamine phosphate transferase 1 OS=Mus musculus GN=Pign	2	18.9822	19.2578	19.8809	6.38091	5.90818	6.90458		6.39789	19.3736		0.498417	0.460411		3.02813		1.59843		2.47732e-06	12	0.00164411
sp|Q61730|IL1AP_MOUSE	Il1rap	Interleukin-1 receptor accessory protein OS=Mus musculus GN=Il1rap PE=1 SV=1	4	17.629	17.0406	16.9209	10.4883	9.21715	9.43622		9.71389	17.1968		0.679545	0.379022		1.77033		0.824022		3.8051e-05	184	0.00164695
sp|Q62261|SPTB2_MOUSE	Sptbn1	Spectrin beta chain, brain 1 OS=Mus musculus GN=Sptbn1 PE=1 SV=2	200	20.0302	19.0513	18.6901	7.79625	7.27295	7.10453		7.39124	19.2572		0.360713	0.693371		2.60541		1.38151		6.21441e-06	30	0.00164972
sp|P32233|DRG1_MOUSE	Drg1	Developmentally-regulated GTP-binding protein 1 OS=Mus musculus GN=Drg1 PE=1 SV=1	20	8.71707	8.42645	8.28335	14.8124	14.4102	14.6694		14.6307	8.47562		0.203878	0.221002		0.579305		-0.787604		1.8883e-06	9	0.00167093
tr|E9QPY6|E9QPY6_MOUSE	Msh3	Uncharacterized protein OS=Mus musculus GN=Msh3 PE=3 SV=1	6	5.29117	4.29751	3.96647	21.157	20.9926	20.4707		20.8734	4.51838		0.358333	0.689417		0.216466		-2.20779		1.68942e-06	8	0.00168181
sp|Q8R127|SCPDH_MOUSE	Sccpdh	Probable saccharopine dehydrogenase OS=Mus musculus GN=Sccpdh PE=2 SV=1	9	17.9146	17.6615	17.3912	9.86144	10.3457	10.6268		10.278	17.6558		0.387148	0.261747		1.71782		0.780583		5.3186e-06	25	0.00169429
sp|Q6PE54|DHX40_MOUSE	Dhx40	Probable ATP-dependent RNA helicase DHX40 OS=Mus musculus GN=Dhx40 PE=2 SV=1	2	7.96213	7.29624	6.95056	17.9443	17.3021	18.0325		17.7596	7.40298		0.398682	0.514162		0.416843		-1.26242		5.14658e-06	24	0.00170781
sp|Q9QYB5-2|ADDG_MOUSE	Add3	Isoform 1 of Gamma-adducin OS=Mus musculus GN=Add3	18	23.8404	21.6775	21.4676	8.41665	8.59628	7.27645		8.09646	22.3285		0.715807	1.31354		2.75781		1.46352		3.97059e-05	185	0.00170929
sp|Q7TT50|MRCKB_MOUSE	Cdc42bpb	Serine/threonine-protein kinase MRCK beta OS=Mus musculus GN=Cdc42bpb PE=1 SV=2	37	17.1556	17.8144	17.1601	8.83121	8.67757	8.34383		8.61754	17.3767		0.249174	0.379066		2.01643		1.01181		2.38367e-06	11	0.00172578
tr|A2A7S7|A2A7S7_MOUSE	Yars	Tyrosyl-tRNA synthetase OS=Mus musculus GN=Yars PE=4 SV=1	49	6.44148	6.99482	8.23616	16.0526	15.8569	16.1532		16.0209	7.22415		0.150672	0.919056		0.450921		-1.14905		4.08559e-05	188	0.00173073
sp|Q9WTX8|MD1L1_MOUSE	Mad1l1	Mitotic spindle assembly checkpoint protein MAD1 OS=Mus musculus GN=Mad1l1 PE=2 SV=1	23	8.15618	8.32479	8.92731	15.0116	16.2427	15.3983		15.5509	8.46943		0.629571	0.405401		0.544627		-0.876659		4.06587e-05	187	0.00173158
sp|Q9CQB5|CISD2_MOUSE	Cisd2	CDGSH iron-sulfur domain-containing protein 2 OS=Mus musculus GN=Cisd2 PE=1 SV=1	4	7.05021	5.87738	5.3117	17.6562	16.2299	16.7837		16.8899	6.07976		0.71906	0.886749		0.359964		-1.47408		4.04573e-05	186	0.00173227
sp|Q9CQA5-2|MED4_MOUSE	Med4	Isoform 2 of Mediator of RNA polymerase II transcription subunit 4 OS=Mus musculus GN=Med4	4	8.57572	7.98767	8.71869	15.0411	14.0232	14.7998		14.6214	8.42736		0.531892	0.387435		0.576373		-0.794926		4.14173e-05	190	0.00173604
sp|O09030|I13R1_MOUSE	Il13ra1	Interleukin-13 receptor subunit alpha-1 OS=Mus musculus GN=Il13ra1 PE=2 SV=1	1	6.48763	5.82575	4.26797	19.8238	22.125	20.6587		20.8692	5.52712		1.16495	1.13957		0.264846		-1.91677		4.139e-05	189	0.00174408
sp|Q9QZA0|CAH5B_MOUSE	Ca5b	Carbonic anhydrase 5B, mitochondrial OS=Mus musculus GN=Ca5b PE=2 SV=2	5	8.9694	8.58871	8.3025	19.3453	20.4706	20.3709		20.0623	8.6202		0.622909	0.334564		0.429672		-1.21869		4.81987e-06	22	0.00174479
tr|D3Z5I1|D3Z5I1_MOUSE	Zc3hav1	Uncharacterized protein OS=Mus musculus GN=Zc3hav1 PE=4 SV=1	26	9.21582	8.65448	8.42114	12.5872	12.778	12.7072		12.6908	8.76381		0.0964514	0.408466		0.690564		-0.534152		4.24081e-05	193	0.00174994
tr|E9Q238|E9Q238_MOUSE	Kank1	Uncharacterized protein OS=Mus musculus GN=Kank1 PE=4 SV=1	9	19.5201	19.4958	18.1397	8.83359	9.73652	8.21425		8.92812	19.0519		0.765525	0.790053		2.13392		1.0935		4.5282e-05	206	0.00175061
sp|Q80T85|DCAF5_MOUSE	Dcaf5	DDB1- and CUL4-associated factor 5 OS=Mus musculus GN=Dcaf5 PE=1 SV=2	5	17.4466	16.1495	17.3907	8.44077	8.60827	7.51955		8.18953	16.9956		0.586233	0.733277		2.07528		1.05331		4.19924e-05	191	0.00175093
tr|E9Q8D0|E9Q8D0_MOUSE	Dnajc21	Uncharacterized protein OS=Mus musculus GN=Dnajc21 PE=4 SV=1	6	7.43119	6.55487	7.69822	13.1295	12.842	13.1175		13.0297	7.22809		0.162635	0.598121		0.554741		-0.850113		4.23517e-05	192	0.00175671
sp|Q9D1D4|TMEDA_MOUSE	Tmed10	Transmembrane emp24 domain-containing protein 10 OS=Mus musculus GN=Tmed10 PE=2 SV=1	14	20.603	20.0557	20.1559	5.87715	6.20623	8.49799		6.86046	20.2715		1.42766	0.291398		2.95484		1.56308		4.5255e-05	205	0.0017581
sp|Q6GYP7-2|RGPA1_MOUSE	Ralgapa1	Isoform 2 of Ral GTPase-activating protein subunit alpha-1 OS=Mus musculus GN=Ralgapa1	4	18.5415	18.7768	20.1282	7.65579	8.94835	8.97042		8.52485	19.1488		0.752712	0.856277		2.24624		1.16751		4.30963e-05	195	0.0017601
tr|B9EJX5|B9EJX5_MOUSE	Taf2	TAF2 RNA polymerase II, TATA box binding protein (TBP)-associated factor OS=Mus musculus GN=Taf2 PE=2 SV=1	12	8.67457	8.02988	7.99821	15.1143	14.0622	14.2979		14.4915	8.23422		0.552114	0.381683		0.568212		-0.8155		4.30262e-05	194	0.00176629
sp|Q9CZQ6|RAE1E_MOUSE	Raet1e	Retinoic acid early-inducible protein 1-epsilon OS=Mus musculus GN=Raet1e PE=2 SV=1	3	22.1239	19.3796	20.8211	7.48475	7.25081	6.37284		7.03613	20.7749		0.586217	1.37273		2.9526		1.56198		4.52517e-05	204	0.00176659
sp|P06537-2|GCR_MOUSE	Nr3c1	Isoform 2 of Glucocorticoid receptor OS=Mus musculus GN=Nr3c1	11	15.4001	15.3955	16.0379	8.17015	8.18483	8.64094		8.33197	15.6112		0.267674	0.369569		1.87365		0.905848		5.1033e-06	23	0.00176707
sp|Q6P2B1|TNPO3_MOUSE	Tnpo3	Transportin-3 OS=Mus musculus GN=Tnpo3 PE=1 SV=1	16	9.62507	9.11815	9.08647	16.0059	15.1977	14.8736		15.3591	9.27656		0.583143	0.302231		0.60398		-0.727428		4.41709e-05	199	0.00176773
sp|O08740|RPB11_MOUSE	Polr2j	DNA-directed RNA polymerase II subunit RPB11 OS=Mus musculus GN=Polr2j PE=2 SV=1	2	6.6629	5.68655	7.36229	16.8257	16.9554	15.732		16.5044	6.57058		0.672025	0.841676		0.398112		-1.32876		4.48851e-05	202	0.00176963
sp|Q9Z204|HNRPC_MOUSE	Hnrnpc	Heterogeneous nuclear ribonucleoproteins C1/C2 OS=Mus musculus GN=Hnrnpc PE=1 SV=1	2	7.14245	6.27404	8.1091	17.7375	17.0027	16.6187		17.1196	7.1752		0.568492	0.917968		0.419121		-1.25456		4.51388e-05	203	0.00177086
sp|Q63943-2|MEF2D_MOUSE	Mef2d	Isoform Muscle of Myocyte-specific enhancer factor 2D OS=Mus musculus GN=Mef2d	2	6.51922	4.88756	6.29497	17.4622	18.3062	16.5531		17.4405	5.90058		0.876751	0.88444		0.338327		-1.56351		4.4065e-05	198	0.00177239
sp|Q9D4G9|RMI1_MOUSE	Rmi1	RecQ-mediated genome instability protein 1 OS=Mus musculus GN=Rmi1 PE=2 SV=1	2	8.72075	7.48562	7.58783	15.7096	16.5825	16.8548		16.3823	7.9314		0.598273	0.685505		0.484144		-1.04649		4.36579e-05	196	0.00177394
sp|P43346|DCK_MOUSE	Dck	Deoxycytidine kinase OS=Mus musculus GN=Dck PE=1 SV=1	7	7.50714	8.71122	7.65904	17.9459	18.8929	19.9274		18.9221	7.95913		0.991072	0.655739		0.420627		-1.24939		4.48455e-05	201	0.00177686
sp|Q9JIK9|RT34_MOUSE	Mrps34	28S ribosomal protein S34, mitochondrial OS=Mus musculus GN=Mrps34 PE=2 SV=1	9	6.21478	6.43353	7.3586	15.1084	16.09	14.7192		15.3059	6.66897		0.706412	0.60717		0.435713		-1.19855		4.39559e-05	197	0.00177698
tr|E9PYI6|E9PYI6_MOUSE	4732471D19	Uncharacterized protein OS=Mus musculus GN=4732471D19Rik PE=4 SV=1	1	8.35147	8.50358	8.40423	15.5526	17.1993	16.9036		16.5518	8.41976		0.877901	0.077235		0.50869		-0.97514		4.48025e-05	200	0.00178404
sp|Q9CQX4|PAF_MOUSE	Paf	PCNA-associated factor OS=Mus musculus GN=Paf PE=2 SV=1	5	7.44495	6.47036	7.09522	18.2714	20.5711	20.496		19.7795	7.00351		1.30659	0.493725		0.354079		-1.49786		4.63814e-05	207	0.00178445
sp|Q6PG16-2|HJURP_MOUSE	Hjurp	Isoform 2 of Holliday junction recognition protein OS=Mus musculus GN=Hjurp	5	6.49916	8.28836	6.125	18.3277	19.0562	19.5809		18.9883	6.97084		0.629356	1.15624		0.367113		-1.4457		4.67442e-05	208	0.00178976
sp|Q9CXF7-2|CHD1L_MOUSE	Chd1l	Isoform 2 of Chromodomain-helicase-DNA-binding protein 1-like OS=Mus musculus GN=Chd1l	8	6.27392	5.15665	5.00341	17.9263	17.9212	17.4091		17.7522	5.47799		0.297144	0.693538		0.308581		-1.69628		4.71991e-06	21	0.00178997
sp|Q6P5H2|NEST_MOUSE	Nes	Nestin OS=Mus musculus GN=Nes PE=1 SV=1	72	2.62279	1.96655	2.52306	20.5458	19.3387	19.0138		19.6328	2.3708		0.807225	0.353624		0.120757		-3.04982		2.25149e-06	10	0.00179309
sp|P52482|UB2E1_MOUSE	Ube2e1	Ubiquitin-conjugating enzyme E2 E1 OS=Mus musculus GN=Ube2e1 PE=1 SV=1	3	10.1888	9.21828	10.0531	16.381	16.915	15.9226		16.4062	9.82006		0.49668	0.525555		0.598558		-0.740437		4.71677e-05	209	0.00179734
sp|Q6ZQL4|WDR43_MOUSE	Wdr43	WD repeat-containing protein 43 OS=Mus musculus GN=Wdr43 PE=1 SV=2	21	6.8824	5.51382	6.88635	15.765	16.7407	17.3505		16.6187	6.42752		0.799756	0.791293		0.386764		-1.37048		4.81951e-05	211	0.00181908
sp|Q8K0S9|SNPC1_MOUSE	Snapc1	snRNA-activating protein complex subunit 1 OS=Mus musculus GN=Snapc1 PE=2 SV=1	1	8.61122	7.34847	7.04146	18.1369	16.8684	18.154		17.7198	7.66705		0.737355	0.831959		0.432683		-1.20862		4.85249e-05	212	0.00182289
tr|Q8BVY4|Q8BVY4_MOUSE	Supt3h	Suppressor of Ty 3 homolog (S. cerevisiae) OS=Mus musculus GN=Supt3h PE=2 SV=1	2	9.87964	8.40661	8.71198	16.9824	16.8658	16.3275		16.7252	8.99941		0.349346	0.777442		0.538074		-0.894124		4.80691e-05	210	0.00182296
sp|P97314|CSRP2_MOUSE	Csrp2	Cysteine and glycine-rich protein 2 OS=Mus musculus GN=Csrp2 PE=1 SV=3	13	20.2884	22.0555	22.3592	8.38095	8.46362	9.89429		8.91295	21.5677		0.850867	1.11826		2.41982		1.2749		4.93138e-05	214	0.00183521
sp|Q921I9|EXOS4_MOUSE	Exosc4	Exosome complex component RRP41 OS=Mus musculus GN=Exosc4 PE=2 SV=3	5	9.1143	8.92964	9.78814	15.0069	14.4549	14.2859		14.5826	9.27736		0.377073	0.451882		0.636195		-0.652458		4.91353e-05	213	0.00183715
sp|P97499|TEP1_MOUSE	Tep1	Telomerase protein component 1 OS=Mus musculus GN=Tep1 PE=1 SV=1	8	18.1396	17.5075	18.1075	7.83315	8.36263	7.35951		7.85176	17.9182		0.501819	0.356039		2.28206		1.19034		4.61431e-06	20	0.00183742
sp|Q9D1M4|MCA3_MOUSE	Eef1e1	Eukaryotic translation elongation factor 1 epsilon-1 OS=Mus musculus GN=Eef1e1 PE=2 SV=1	12	6.70638	6.40869	6.40949	17.3851	15.2597	16.0714		16.2387	6.50819		1.07254	0.171641		0.400782		-1.31911		5.03512e-05	217	0.00184791
sp|Q61102|ABCB7_MOUSE	Abcb7	ATP-binding cassette sub-family B member 7, mitochondrial OS=Mus musculus GN=Abcb7 PE=1 SV=3	12	10.6658	10.5964	10.5604	15.2894	14.7187	14.3721		14.7934	10.6075		0.46319	0.0535747		0.717045		-0.479864		4.99385e-05	215	0.00184981
sp|Q9D125|RT25_MOUSE	Mrps25	28S ribosomal protein S25, mitochondrial OS=Mus musculus GN=Mrps25 PE=1 SV=1	4	8.71742	8.04115	8.52082	13.9891	14.3934	13.382		13.9215	8.42646		0.509077	0.347869		0.605284		-0.724316		5.13929e-05	221	0.00185201
sp|Q3UMQ8|NAF1_MOUSE	Naf1	H/ACA ribonucleoprotein complex non-core subunit NAF1 OS=Mus musculus GN=Naf1 PE=1 SV=2	3	6.49498	6.28531	6.04391	18.986	16.5563	17.2996		17.614	6.27473		1.24498	0.225721		0.356236		-1.48909		5.02767e-05	216	0.00185372
tr|Q78RX3|Q78RX3_MOUSE	BC003266	Uncharacterized protein OS=Mus musculus GN=BC003266 PE=2 SV=1	3	4.41652	6.68986	4.84958	21.0491	20.2129	18.8128		20.0249	5.31865		1.12994	1.20708		0.265602		-1.91266		5.17963e-05	222	0.00185813
sp|Q80UU1|ANKZ1_MOUSE	Ankzf1	Ankyrin repeat and zinc finger domain-containing protein 1 OS=Mus musculus GN=Ankzf1 PE=2 SV=2	5	13.7796	13.5549	14.0307	11.0758	10.6528	10.6852		10.8046	13.7884		0.235424	0.238022		1.27616		0.351809		5.13802e-05	220	0.00185996
sp|Q9CQV7|TIM14_MOUSE	Dnajc19	Mitochondrial import inner membrane translocase subunit TIM14 OS=Mus musculus GN=Dnajc19 PE=2 SV=3	3	6.3887	6.96289	7.05769	17.203	16.7941	15.277		16.4247	6.80309		1.01475	0.361992		0.414199		-1.2716		5.09754e-05	218	0.00186224
sp|P18828-2|SDC1_MOUSE	Sdc1	Isoform 2 of Syndecan-1 OS=Mus musculus GN=Sdc1	4	22.3173	25.1534	23.5827	7.4876	4.71849	5.95268		6.05292	23.6845		1.38727	1.42079		3.9129		1.96824		5.21511e-05	223	0.00186247
sp|P24788|CDK11_MOUSE	Cdk11	Cyclin-dependent kinase 11 OS=Mus musculus GN=Cdk11 PE=1 SV=2	23	8.3276	6.50462	7.38705	16.4132	17.4458	16.6672		16.8421	7.40642		0.538052	0.911644		0.439757		-1.18522		5.13617e-05	219	0.00186778
sp|Q9D2G5-5|SYNJ2_MOUSE	Synj2	Isoform 5 of Synaptojanin-2 OS=Mus musculus GN=Synj2	2	1.40196	1.58011	1.98708	19.409	23.3254	19.8456		20.86	1.65638		2.14623	0.299924		0.0794048		-3.65463		5.25605e-05	224	0.00186871
sp|Q9WV03|FA50A_MOUSE	Fam50a	Protein FAM50A OS=Mus musculus GN=Fam50a PE=2 SV=1	15	8.57579	6.53612	8.05915	17.9687	19.063	18.1827		18.4048	7.72369		0.579974	1.06041		0.419656		-1.25272		5.31321e-05	226	0.00187232
sp|Q9ERE7|MESD_MOUSE	Mesdc2	LDLR chaperone MESD OS=Mus musculus GN=Mesdc2 PE=1 SV=1	12	20.4769	18.0497	18.6116	7.16288	7.41476	7.80022		7.45929	19.0461		0.320995	1.27059		2.55334		1.35238		5.30324e-05	225	0.00187711
sp|Q80V94|AP4E1_MOUSE	Ap4e1	AP-4 complex subunit epsilon-1 OS=Mus musculus GN=Ap4e1 PE=2 SV=3	7	15.5934	16.5739	17.5171	8.08947	8.17413	8.07878		8.11413	16.5615		0.0522386	0.96191		2.04107		1.02932		5.47832e-05	232	0.00188057
tr|E9PZ26|E9PZ26_MOUSE	Brd1	Uncharacterized protein OS=Mus musculus GN=Brd1 PE=4 SV=1	4	8.29348	7.10138	8.38031	15.1416	16.0115	16.1004		15.7512	7.92506		0.529768	0.714645		0.503141		-0.990966		5.40864e-05	229	0.00188098
sp|Q9Z206-2|ARHG8_MOUSE	Net1	Isoform 2 of Neuroepithelial cell-transforming gene 1 protein OS=Mus musculus GN=Net1	3	6.32861	8.35512	6.22084	20.0985	19.8467	18.6581		19.5344	6.96819		0.769299	1.20232		0.356713		-1.48716		5.39338e-05	228	0.0018839
sp|Q3UMR0-2|ANR27_MOUSE	Ankrd27	Isoform 2 of Ankyrin repeat domain-containing protein 27 OS=Mus musculus GN=Ankrd27	3	17.9434	16.8197	18.047	8.45785	7.10078	8.64145		8.06669	17.6034		0.841528	0.680649		2.18223		1.1258		5.37539e-05	227	0.00188589
sp|Q8R3H9|TTC4_MOUSE	Ttc4	Tetratricopeptide repeat protein 4 OS=Mus musculus GN=Ttc4 PE=2 SV=1	9	8.91686	7.7408	8.15392	17.1589	15.859	16.0471		16.355	8.27053		0.702522	0.596638		0.505688		-0.983681		5.47232e-05	231	0.00188665
sp|Q5Y5T1-2|ZDH20_MOUSE	Zdhhc20	Isoform 2 of Probable palmitoyltransferase ZDHHC20 OS=Mus musculus GN=Zdhhc20	6	18.9151	18.2153	20.5267	8.04081	7.46262	8.4282		7.97721	19.219		0.485922	1.18529		2.40924		1.26858		5.46189e-05	230	0.00189124
sp|Q6PAM1|TXLNA_MOUSE	Txlna	Alpha-taxilin OS=Mus musculus GN=Txlna PE=2 SV=1	23	8.67337	7.59659	8.27107	17.595	17.6944	17.3631		17.5508	8.18034		0.170009	0.544093		0.466094		-1.10131		4.52766e-06	19	0.0018978
sp|Q91XB0|TREX1_MOUSE	Trex1	Three prime repair exonuclease 1 OS=Mus musculus GN=Trex1 PE=1 SV=2	1	6.3281	5.35431	5.87697	22.3629	20.4126	24.0717		22.2824	5.85313		1.83088	0.487333		0.262679		-1.92863		5.72496e-05	237	0.00192378
sp|Q6PCM1|KDM3A_MOUSE	Kdm3a	Lysine-specific demethylase 3A OS=Mus musculus GN=Kdm3a PE=1 SV=1	8	8.39898	6.5682	7.61526	17.4394	18.542	17.1631		17.7148	7.52748		0.729547	0.918541		0.424925		-1.23472		5.69055e-05	235	0.00192849
sp|Q9JJ66|CDC20_MOUSE	Cdc20	Cell division cycle protein 20 homolog OS=Mus musculus GN=Cdc20 PE=1 SV=2	4	6.8599	7.76323	6.29862	17.7463	16.7863	18.8889		17.8072	6.97392		1.05262	0.738932		0.391635		-1.35242		6.41874e-05	265	0.00192901
sp|Q8R1M0|CC037_MOUSE		UPF0361 protein C3orf37 homolog OS=Mus musculus PE=2 SV=1	5	8.68367	6.76155	7.6081	17.661	16.8858	18.0591		17.5353	7.68444		0.596665	0.963331		0.438227		-1.19025		5.66839e-05	234	0.00192919
sp|P43275|H11_MOUSE	Hist1h1a	Histone H1.1 OS=Mus musculus GN=Hist1h1a PE=2 SV=2	12	3.76078	1.18407	1.38074	26.1852	27.1774	22.6945		25.3524	2.10853		2.35464	1.43427		0.083169		-3.58781		6.39705e-05	264	0.00192978
sp|Q91WG3|TRUB2_MOUSE	Trub2	Probable tRNA pseudouridine synthase 2 OS=Mus musculus GN=Trub2 PE=2 SV=1	2	3.82867	5.02937	4.3774	16.4052	16.0485	18.5852		17.013	4.41181		1.37323	0.601089		0.259321		-1.94719		6.47038e-05	267	0.00192997
sp|Q99JR8-2|SMRD2_MOUSE	Smarcd2	Isoform 2 of SWI/SNF-related matrix-associated actin-dependent regulator of chromatin subfamily D member 2 OS=Mus musculus GN=Smarcd2	12	6.59191	6.52872	6.84605	17.268	17.5924	15.451		16.7705	6.65556		1.15415	0.167967		0.396862		-1.33329		5.7221e-05	236	0.00193097
sp|O55029|COPB2_MOUSE	Copb2	Coatomer subunit beta' OS=Mus musculus GN=Copb2 PE=2 SV=2	71	15.581	15.055	16.0468	11.069	10.6854	11.0039		10.9194	15.5609		0.205276	0.496204		1.42507		0.511031		5.79826e-05	239	0.00193211
sp|Q3UZ01-2|RBM40_MOUSE	Rnpc3	Isoform 2 of RNA-binding protein 40 OS=Mus musculus GN=Rnpc3	3	7.08538	6.44613	8.44114	17.8623	17.133	16.8493		17.2815	7.32422		0.522579	1.01872		0.423818		-1.23848		5.65961e-05	233	0.00193447
sp|Q9CR16|PPID_MOUSE	Ppid	Peptidyl-prolyl cis-trans isomerase D OS=Mus musculus GN=Ppid PE=1 SV=3	27	6.10787	6.62775	7.89699	16.4774	15.2721	15.8938		15.8811	6.87754		0.60275	0.920344		0.433064		-1.20735		7.19055e-05	296	0.00193465
sp|Q9QUJ7-2|ACSL4_MOUSE	Acsl4	Isoform Short of Long-chain-fatty-acid--CoA ligase 4 OS=Mus musculus GN=Acsl4	24	6.73833	6.05477	5.34164	12.783	13.757	13.5991		13.3797	6.04491		0.522754	0.698397		0.451797		-1.14625		6.4655e-05	266	0.00193576
sp|Q8BJ71|NUP93_MOUSE	Nup93	Nuclear pore complex protein Nup93 OS=Mus musculus GN=Nup93 PE=2 SV=1	55	10.0421	9.3502	9.88503	14.1326	14.326	14.9455		14.468	9.75911		0.424655	0.36273		0.674529		-0.568047		6.39414e-05	263	0.00193623
sp|Q9Z277|BAZ1B_MOUSE	Baz1b	Tyrosine-protein kinase BAZ1B OS=Mus musculus GN=Baz1b PE=1 SV=2	61	8.27851	6.159	6.85181	17.8145	16.6827	16.9862		17.1611	7.09644		0.585828	1.08072		0.413518		-1.27398		7.17851e-05	295	0.00193795
sp|Q8C8U0-3|LIPB1_MOUSE	Ppfibp1	Isoform 3 of Liprin-beta-1 OS=Mus musculus GN=Ppfibp1	55	15.4102	16.1449	16.1017	10.5813	11.3372	11.0943		11.0043	15.8856		0.385909	0.412275		1.44359		0.529657		5.79717e-05	238	0.00193986
sp|Q8BUR4|DOCK1_MOUSE	Dock1	Dedicator of cytokinesis protein 1 OS=Mus musculus GN=Dock1 PE=1 SV=3	34	15.0926	16.1663	16.3939	9.80113	9.79328	9.23075		9.60839	15.8843		0.327066	0.694984		1.65317		0.725232		7.23649e-05	297	0.00194045
tr|Q99LB4|Q99LB4_MOUSE	Capg	Capping protein (Actin filament), gelsolin-like OS=Mus musculus GN=Capg PE=2 SV=1	18	20.5702	21.8957	19.4662	9.12871	8.23083	9.5234		8.96098	20.644		0.662408	1.21643		2.30377		1.204		6.38452e-05	262	0.0019407
sp|P62315|SMD1_MOUSE	Snrpd1	Small nuclear ribonucleoprotein Sm D1 OS=Mus musculus GN=Snrpd1 PE=2 SV=1	5	8.29715	7.83342	8.53936	15.3686	14.3311	15.7549		15.1515	8.22331		0.736302	0.358716		0.542738		-0.881673		6.31293e-05	259	0.00194117
sp|Q3UKJ7|SMU1_MOUSE	Smu1	WD40 repeat-containing protein SMU1 OS=Mus musculus GN=Smu1 PE=2 SV=2	20	9.66252	8.33844	9.0634	16.3661	15.4731	15.7262		15.8551	9.02145		0.46025	0.663036		0.568993		-0.813518		6.29033e-05	258	0.00194171
sp|Q6P5F9|XPO1_MOUSE	Xpo1	Exportin-1 OS=Mus musculus GN=Xpo1 PE=1 SV=1	55	8.54309	9.01676	7.88505	15.8694	14.7198	15.7528		15.4473	8.48163		0.632754	0.568353		0.549068		-0.864944		7.17011e-05	294	0.00194227
sp|Q80U72-4|SCRIB_MOUSE	Scrib	Isoform 4 of Protein scribble homolog OS=Mus musculus GN=Scrib	34	9.32295	8.26017	8.65934	14.6026	15.3565	14.3879		14.7823	8.74749		0.508699	0.536845		0.591753		-0.756934		7.27436e-05	298	0.00194406
sp|P97313|PRKDC_MOUSE	Prkdc	DNA-dependent protein kinase catalytic subunit OS=Mus musculus GN=Prkdc PE=1 SV=3	18	13.6666	13.1851	13.4661	8.90618	9.78857	9.2927		9.32915	13.4393		0.442323	0.241869		1.44057		0.526637		7.29896e-05	299	0.00194411
sp|Q7TQC5-3|APTX_MOUSE	Aptx	Isoform 3 of Aprataxin OS=Mus musculus GN=Aptx	4	8.26848	6.37619	7.59061	18.017	16.6752	17.1191		17.2704	7.41176		0.683581	0.958739		0.429159		-1.22042		6.57323e-05	269	0.00194607
sp|O54910|IKBE_MOUSE	Nfkbie	NF-kappa-B inhibitor epsilon OS=Mus musculus GN=Nfkbie PE=2 SV=2	1	8.46301	9.33859	8.79203	20.2058	21.6301	19.0725		20.3028	8.86454		1.28156	0.442271		0.436617		-1.19556		6.37805e-05	261	0.00194616
sp|O54790|MAFG_MOUSE	Mafg	Transcription factor MafG OS=Mus musculus GN=Mafg PE=1 SV=1	1	3.52975	5.59162	5.98976	19.0769	18.7288	17.3685		18.3914	5.03704		0.902794	1.32045		0.27388		-1.86838		6.64777e-05	272	0.00194643
sp|Q78PG9|CCD25_MOUSE	Ccdc25	Coiled-coil domain-containing protein 25 OS=Mus musculus GN=Ccdc25 PE=1 SV=1	10	15.3487	16.1172	15.9049	9.86284	8.56604	9.57447		9.33445	15.7903		0.680904	0.396867		1.69161		0.758399		7.16466e-05	293	0.00194742
sp|Q9DCA5|BRX1_MOUSE	Brix1	Ribosome biogenesis protein BRX1 homolog OS=Mus musculus GN=Brix1 PE=2 SV=3	20	5.28717	4.86477	5.73756	13.2725	15.0546	13.678		14.0017	5.2965		0.934107	0.43647		0.378275		-1.40249		6.36008e-05	260	0.00194814
sp|P43136|NR2F6_MOUSE	Nr2f6	Nuclear receptor subfamily 2 group F member 6 OS=Mus musculus GN=Nr2f6 PE=1 SV=2	2	9.70997	9.08919	8.5408	16.8754	16.504	15.6398		16.3397	9.11332		0.633967	0.584958		0.55774		-0.842336		6.55861e-05	268	0.00194898
sp|Q8R2T8-2|TF3C5_MOUSE	Gtf3c5	Isoform 2 of General transcription factor 3C polypeptide 5 OS=Mus musculus GN=Gtf3c5	10	10.4446	9.61072	9.39049	14.8442	14.5414	14.6981		14.6946	9.81527		0.151431	0.556028		0.667952		-0.582183		6.28985e-05	257	0.00194912
sp|Q91WE6-2|CDKAL_MOUSE	Cdkal1	Isoform 2 of CDK5 regulatory subunit-associated protein 1-like 1 OS=Mus musculus GN=Cdkal1	3	9.48882	8.99309	9.54887	15.511	16.0893	17.03		16.2101	9.34359		0.766671	0.305026		0.576406		-0.794844		6.73284e-05	275	0.00194983
sp|Q9D855|QCR7_MOUSE	Uqcrb	Cytochrome b-c1 complex subunit 7 OS=Mus musculus GN=Uqcrb PE=1 SV=3	10	5.73372	7.51656	6.24187	16.3562	15.2731	15.3684		15.6659	6.49738		0.599713	0.918474		0.414747		-1.2697		6.61767e-05	270	0.00195197
sp|Q3UGF1|WDR19_MOUSE	Wdr19	WD repeat-containing protein 19 OS=Mus musculus GN=Wdr19 PE=1 SV=1	13	16.6777	18.5885	18.0668	9.31094	9.61066	9.2222		9.38127	17.7777		0.203555	0.987668		1.89502		0.922211		6.71873e-05	274	0.00195285
sp|Q9DBS1|TMM43_MOUSE	Tmem43	Transmembrane protein 43 OS=Mus musculus GN=Tmem43 PE=1 SV=1	20	17.44	15.8494	17.0542	9.7457	9.91657	9.6915		9.78459	16.7812		0.117467	0.829698		1.71506		0.778263		6.6455e-05	271	0.00195294
sp|Q8BG81|PDIP3_MOUSE	Poldip3	Polymerase delta-interacting protein 3 OS=Mus musculus GN=Poldip3 PE=2 SV=1	25	8.04094	6.43041	7.89055	16.1849	16.7743	15.5998		16.1863	7.45397		0.587251	0.88961		0.46051		-1.1187		7.16255e-05	292	0.00195351
sp|Q9JKF7|RM39_MOUSE	Mrpl39	39S ribosomal protein L39, mitochondrial OS=Mus musculus GN=Mrpl39 PE=2 SV=4	10	8.97973	9.54235	9.6254	13.8184	14.0609	14.682		14.1871	9.38249		0.445417	0.351266		0.66134		-0.596536		6.28119e-05	256	0.00195404
sp|Q8BHN1-3|TXLNG_MOUSE	Txlng	Isoform 3 of Gamma-taxilin OS=Mus musculus GN=Txlng	3	9.56777	10.0674	9.85043	15.635	15.4971	14.5385		15.2235	9.82853		0.59725	0.250534		0.645614		-0.631255		6.7072e-05	273	0.00195663
sp|Q9Z2N8|ACL6A_MOUSE	Actl6a	Actin-like protein 6A OS=Mus musculus GN=Actl6a PE=1 SV=2	18	8.40112	6.66566	8.14131	16.7237	16.0193	16.6882		16.4771	7.73603		0.396835	0.936026		0.469503		-1.09079		5.92115e-05	241	0.00195668
sp|Q61466|SMRD1_MOUSE	Smarcd1	SWI/SNF-related matrix-associated actin-dependent regulator of chromatin subfamily D member 1 OS=Mus musculus GN=Smarcd1 PE=1 SV=3	13	5.68246	5.33349	6.26782	20.0885	18.2173	17.1669		18.4909	5.76126		1.47989	0.472123		0.311573		-1.68236		7.15294e-05	291	0.0019576
tr|F2Z4A3|F2Z4A3_MOUSE	Fat1	Uncharacterized protein OS=Mus musculus GN=Fat1 PE=4 SV=1	125	26.4513	30.5104	25.3082	3.70553	4.03629	3.28636		3.67606	27.4233		0.375833	2.73392		7.45997		2.89917		5.90076e-05	240	0.00195807
sp|Q8R3S6|EXOC1_MOUSE	Exoc1	Exocyst complex component 1 OS=Mus musculus GN=Exoc1 PE=2 SV=4	16	14.9461	15.8782	15.681	10.8744	10.8885	11.2334		10.9988	15.5018		0.203321	0.491219		1.40941		0.495091		6.28044e-05	255	0.00196147
sp|Q8C1A3|MTRR_MOUSE	Mtrr	Methionine synthase reductase OS=Mus musculus GN=Mtrr PE=2 SV=2	1	8.40809	8.90358	8.94725	13.892	14.9117	15.1282		14.644	8.75297		0.660158	0.299475		0.597719		-0.742461		7.3924e-05	300	0.00196243
sp|P70271|PDLI4_MOUSE	Pdlim4	PDZ and LIM domain protein 4 OS=Mus musculus GN=Pdlim4 PE=1 SV=3	12	7.59792	10.3697	8.47323	25.127	23.8346	22.8424		23.9347	8.81362		1.14558	1.41689		0.368236		-1.4413		6.80657e-05	276	0.00196404
sp|Q9JI44|DMAP1_MOUSE	Dmap1	DNA methyltransferase 1-associated protein 1 OS=Mus musculus GN=Dmap1 PE=1 SV=1	6	8.53819	6.44964	6.54272	17.2014	16.8227	17.4023		17.1421	7.17685		0.29431	1.17987		0.418667		-1.25612		7.15247e-05	290	0.00196422
sp|Q5PRE5|CM023_MOUSE		Uncharacterized protein C13orf23 homolog OS=Mus musculus PE=2 SV=1	2	6.85492	6.05813	6.78991	18.6252	16.3023	18.208		17.7118	6.56765		1.23839	0.442456		0.370806		-1.43126		6.26817e-05	254	0.00196534
sp|Q8C0T5|SI1L1_MOUSE	Sipa1l1	Signal-induced proliferation-associated 1-like protein 1 OS=Mus musculus GN=Sipa1l1 PE=1 SV=2	18	15.7798	15.5589	14.7495	7.26303	6.31157	7.90271		7.1591	15.3627		0.800645	0.542439		2.1459		1.10158		6.24362e-05	253	0.00196538
sp|Q8R3J4|MTER1_MOUSE	Mterfd1	mTERF domain-containing protein 1, mitochondrial OS=Mus musculus GN=Mterfd1 PE=2 SV=1	4	3.53496	3.98637	3.58726	20.9216	17.37	18.9516		19.0811	3.70286		1.77934	0.246913		0.19406		-2.36543		6.02281e-05	244	0.00196581
sp|Q9CWL8|CTBL1_MOUSE	Ctnnbl1	Beta-catenin-like protein 1 OS=Mus musculus GN=Ctnnbl1 PE=1 SV=1	14	9.83143	9.56871	10.4025	14.0488	14.4648	14.6169		14.3768	9.93421		0.294088	0.426292		0.690988		-0.533268		5.97418e-05	242	0.00196605
tr|E9QNN9|E9QNN9_MOUSE	Gcfc1	Uncharacterized protein OS=Mus musculus GN=Gcfc1 PE=4 SV=1	15	8.83478	7.15411	7.5796	16.1256	17.1931	16.9682		16.7623	7.85616		0.562748	0.873801		0.468681		-1.09332		5.99943e-05	243	0.00196623
sp|Q8K339|KIN17_MOUSE	Kin	DNA/RNA-binding protein KIN17 OS=Mus musculus GN=Kin PE=2 SV=1	7	8.21085	6.70564	6.42049	18.5764	16.9776	18.1075		17.8872	7.11233		0.821858	0.961973		0.397622		-1.33053		6.14811e-05	249	0.00196641
tr|F6PZC9|F6PZC9_MOUSE	Sorbs1	Uncharacterized protein (Fragment) OS=Mus musculus GN=Sorbs1 PE=4 SV=1	2	17.7797	15.9707	16.1616	7.64932	7.2925	6.6785		7.20677	16.6373		0.491055	0.993912		2.30857		1.207		6.17461e-05	250	0.00196699
sp|A2RSJ4|UH1BL_MOUSE	Uhrf1bp1l	UHRF1-binding protein 1-like OS=Mus musculus GN=Uhrf1bp1l PE=2 SV=2	20	17.121	15.8371	17.4652	8.41325	7.69087	8.88074		8.32829	16.8078		0.599468	0.858058		2.01815		1.01304		7.48448e-05	303	0.00196721
sp|Q99LJ7|RCBT2_MOUSE	Rcbtb2	RCC1 and BTB domain-containing protein 2 OS=Mus musculus GN=Rcbtb2 PE=2 SV=1	7	22.1689	20.3296	19.247	7.3447	5.73742	6.93295		6.67169	20.5818		0.834883	1.47719		3.08495		1.62525		7.14244e-05	289	0.00196825
sp|Q8VCD5|MED17_MOUSE	Med17	Mediator of RNA polymerase II transcription subunit 17 OS=Mus musculus GN=Med17 PE=1 SV=1	9	9.67268	8.32833	8.20076	15.3858	15.7715	15.8833		15.6802	8.73392		0.261014	0.815485		0.557003		-0.844242		7.44263e-05	301	0.00196921
sp|Q9R1B9|SLIT2_MOUSE	Slit2	Slit homolog 2 protein OS=Mus musculus GN=Slit2 PE=2 SV=2	3	3.43769	3.83381	3.48116	11.428	12.6853	10.7801		11.6311	3.58422		0.968707	0.217241		0.308157		-1.69826		7.46799e-05	302	0.00196937
sp|O08529|CAN2_MOUSE	Capn2	Calpain-2 catalytic subunit OS=Mus musculus GN=Capn2 PE=2 SV=4	54	16.7736	18.392	19.0335	7.95659	8.15153	8.22992		8.11268	18.0664		0.140746	1.16461		2.22693		1.15506		6.23693e-05	252	0.00197107
sp|Q8R1S4-2|MTSS1_MOUSE	Mtss1	Isoform 2 of Metastasis suppressor protein 1 OS=Mus musculus GN=Mtss1	2	21.4573	23.2131	20.2076	5.3069	6.80206	4.61645		5.57514	21.626		1.11722	1.50984		3.87901		1.95569		6.06442e-05	245	0.00197131
sp|Q8R480|NUP85_MOUSE	Nup85	Nuclear pore complex protein Nup85 OS=Mus musculus GN=Nup85 PE=1 SV=1	13	6.43312	8.08705	7.61979	14.6837	15.1014	15.1753		14.9868	7.37999		0.26508	0.852643		0.492432		-1.022		6.13895e-05	248	0.0019714
sp|Q8VDP2|CX056_MOUSE		UPF0428 protein CXorf56 homolog OS=Mus musculus PE=2 SV=1	3	9.24499	9.01902	7.97782	16.1306	17.4594	16.4575		16.6825	8.74728		0.692384	0.67588		0.524338		-0.93143		7.13138e-05	288	0.00197202
sp|Q9EQC4|ELOV4_MOUSE	Elovl4	Elongation of very long chain fatty acids protein 4 OS=Mus musculus GN=Elovl4 PE=1 SV=2	3	1.55064	1.31055	2.10591	20.6011	22.2977	25.5752		22.8247	1.6557		2.52857	0.407955		0.0725399		-3.78508		6.9168e-05	279	0.00197439
sp|P97304|RPAC2_MOUSE	Polr1d	DNA-directed RNA polymerases I and III subunit RPAC2 OS=Mus musculus GN=Polr1d PE=2 SV=1	2	6.64634	5.86302	6.83211	16.1688	15.0769	17.1828		16.1428	6.44716		1.05319	0.514334		0.399382		-1.32416		6.89299e-05	278	0.00197467
sp|Q9D8T7|SLIRP_MOUSE	Slirp	SRA stem-loop-interacting RNA-binding protein, mitochondrial OS=Mus musculus GN=Slirp PE=1 SV=2	6	8.41219	7.47258	8.09958	14.2154	13.802	13.1751		13.7308	7.99478		0.523789	0.478491		0.58225		-0.780288		7.54178e-05	304	0.00197575
sp|Q9CS74|SGT1_MOUSE	Ecd	Protein SGT1 homolog OS=Mus musculus GN=Ecd PE=2 SV=2	5	9.41023	9.32795	9.47166	13.2619	13.3046	14.1183		13.5616	9.40328		0.482589	0.0721066		0.693375		-0.528291		6.13086e-05	247	0.00197677
sp|O88487|DC1I2_MOUSE	Dync1i2	Cytoplasmic dynein 1 intermediate chain 2 OS=Mus musculus GN=Dync1i2 PE=2 SV=1	23	17.5452	15.8078	16.7784	9.62745	9.42321	9.50565		9.51877	16.7105		0.10275	0.87069		1.75553		0.811905		7.12544e-05	287	0.00197725
sp|A2ASZ8-2|SCMC2_MOUSE	Slc25a25	Isoform 2 of Calcium-binding mitochondrial carrier protein SCaMC-2 OS=Mus musculus GN=Slc25a25	4	6.17465	7.32565	6.51798	18.7462	21.7035	20.6956		20.3818	6.67276		1.50342	0.590904		0.327389		-1.61092		6.23258e-05	251	0.00197754
sp|Q3UMY5|EMAL4_MOUSE	Eml4	Echinoderm microtubule-associated protein-like 4 OS=Mus musculus GN=Eml4 PE=1 SV=1	14	7.36821	6.29957	8.07494	15.5985	15.486	16.4547		15.8464	7.24757		0.529798	0.893812		0.457364		-1.12859		6.88136e-05	277	0.00197845
tr|Q91XY0|Q91XY0_MOUSE	Pcdhga8	MCG133388, isoform CRA_m OS=Mus musculus GN=Pcdhga8 PE=2 SV=1	2	28.0129	26.0863	24.4266	7.52718	5.11984	4.16385		5.60362	26.1753		1.73307	1.7948		4.67113		2.22377		6.98228e-05	281	0.00197889
sp|Q5NBX1-2|COBL_MOUSE	Cobl	Isoform 2 of Protein cordon-bleu OS=Mus musculus GN=Cobl	4	28.7092	30.8702	24.9414	2.57672	3.61909	2.6269		2.9409	28.1736		0.587863	3.00047		9.57991		3.26001		6.9576e-05	280	0.00197894
tr|E9Q3G7|E9Q3G7_MOUSE	Atp11a	Uncharacterized protein OS=Mus musculus GN=Atp11a PE=4 SV=1	1	19.3005	22.0075	22.113	7.86117	8.1756	7.90801		7.98159	21.1403		0.169639	1.59422		2.64864		1.40525		7.10882e-05	286	0.00197953
sp|Q9CPY1|RM51_MOUSE	Mrpl51	39S ribosomal protein L51, mitochondrial OS=Mus musculus GN=Mrpl51 PE=2 SV=1	2	6.69532	5.82607	6.11416	16.0514	17.7952	15.5767		16.4744	6.21185		1.16818	0.442783		0.37706		-1.40713		7.08481e-05	285	0.00197977
sp|Q91ZP3-2|LPIN1_MOUSE	Lpin1	Isoform 2 of Phosphatidate phosphatase LPIN1 OS=Mus musculus GN=Lpin1	3	20.1457	18.9739	20.328	9.86158	8.57888	7.72902		8.72316	19.8159		1.07358	0.73484		2.27164		1.18373		6.11863e-05	246	0.00198084
sp|Q8VCP8|KAD6_MOUSE	Taf9	Adenylate kinase isoenzyme 6 OS=Mus musculus GN=Taf9 PE=2 SV=1	4	6.31594	7.22651	7.87544	17.2045	17.0303	18.8726		17.7025	7.1393		1.0171	0.783399		0.403294		-1.3101		7.0405e-05	283	0.00198129
sp|O88428|PAPS2_MOUSE	Papss2	Bifunctional 3'-phosphoadenosine 5'-phosphosulfate synthase 2 OS=Mus musculus GN=Papss2 PE=1 SV=2	24	22.8404	27.8965	25.456	4.69903	4.52401	4.18796		4.47033	25.3976		0.259729	2.52856		5.68137		2.50624		7.02307e-05	282	0.00198339
sp|P32020|NLTP_MOUSE	Scp2	Non-specific lipid-transfer protein OS=Mus musculus GN=Scp2 PE=1 SV=3	22	10.138	10.178	9.7557	16.0854	15.8568	15.558		15.8334	10.0239		0.264478	0.233127		0.633086		-0.659527		4.48433e-06	18	0.00198407
sp|Q8BZT9|CM031_MOUSE		UPF0124 protein C13orf31 homolog OS=Mus musculus PE=2 SV=1	1	20.6804	17.747	20.3313	5.65182	4.80363	5.99941		5.48495	19.5862		0.615106	1.60236		3.5709		1.83629		7.08139e-05	284	0.00198578
sp|Q8BIQ5-2|CSTF2_MOUSE	Cstf2	Isoform 2 of Cleavage stimulation factor subunit 2 OS=Mus musculus GN=Cstf2	19	8.70168	8.1104	9.06096	15.0523	16.3399	15.1725		15.5216	8.62435		0.711241	0.479975		0.555636		-0.847787		7.71669e-05	309	0.00198886
sp|B8ZXI1|QTRD1_MOUSE	Qtrtd1	Queuine tRNA-ribosyltransferase subunit QTRTD1 OS=Mus musculus GN=Qtrtd1 PE=1 SV=2	3	8.52088	8.37075	9.63493	15.5843	15.4041	16.3795		15.7893	8.84219		0.519009	0.690627		0.560011		-0.836472		7.70462e-05	308	0.0019922
sp|Q9JKY5|HIP1R_MOUSE	Hip1r	Huntingtin-interacting protein 1-related protein OS=Mus musculus GN=Hip1r PE=1 SV=2	16	9.72832	10.9504	10.5346	17.1367	17.8912	16.7494		17.2591	10.4044		0.580657	0.62135		0.602838		-0.730158		7.63463e-05	305	0.00199351
sp|Q8C5N5|PDD2L_MOUSE	Pdcd2l	Programmed cell death protein 2-like OS=Mus musculus GN=Pdcd2l PE=2 SV=1	4	14.4279	14.6029	14.4235	9.93189	9.19484	10.3225		9.81641	14.4848		0.572631	0.10233		1.47557		0.561269		7.76582e-05	310	0.00199507
sp|Q59J78|MIMIT_MOUSE	Ndufaf2	Mimitin, mitochondrial OS=Mus musculus GN=Ndufaf2 PE=2 SV=1	14	8.60329	7.27214	7.84198	15.4023	16.9505	16.0766		16.1431	7.9058		0.776241	0.667866		0.489732		-1.02994		7.69449e-05	307	0.00199606
sp|Q1HFZ0|NSUN2_MOUSE	Nsun2	tRNA (cytosine(34)-C(5))-methyltransferase OS=Mus musculus GN=Nsun2 PE=1 SV=2	42	8.45734	6.527	7.18094	16.5639	16.3312	15.6437		16.1796	7.38843		0.478465	0.981754		0.456651		-1.13084		7.67459e-05	306	0.0019974
sp|Q9JJ06|C1GLT_MOUSE	C1galt1	Glycoprotein-N-acetylgalactosamine 3-beta-galactosyltransferase 1 OS=Mus musculus GN=C1galt1 PE=1 SV=1	5	22.1307	21.5122	22.4582	6.85984	9.62605	6.43928		7.64172	22.0337		1.73129	0.480402		2.88334		1.52774		7.82376e-05	311	0.00200349
sp|Q05186|RCN1_MOUSE	Rcn1	Reticulocalbin-1 OS=Mus musculus GN=Rcn1 PE=1 SV=1	30	18.1574	20.3371	19.963	6.83298	8.59648	7.90113		7.77686	19.4858		0.888293	1.16556		2.50562		1.32517		7.90212e-05	313	0.00201062
sp|Q7TNP2|2AAB_MOUSE	Ppp2r1b	Serine/threonine-protein phosphatase 2A 65 kDa regulatory subunit A beta isoform OS=Mus musculus GN=Ppp2r1b PE=2 SV=2	15	8.52406	9.25209	8.21113	14.7885	14.0238	15.0283		14.6135	8.66243		0.524609	0.534096		0.592767		-0.754462		8.06264e-05	319	0.00201288
sp|Q9CY57-3|FOP_MOUSE	Fop	Isoform 3 of Friend of PRMT1 protein OS=Mus musculus GN=Fop	6	6.21962	5.0036	7.36244	16.5625	17.8424	16.7737		17.0595	6.19522		0.686157	1.17961		0.363153		-1.46135		8.01472e-05	317	0.00201354
sp|Q8C5Q4|GRSF1_MOUSE	Grsf1	G-rich sequence factor 1 OS=Mus musculus GN=Grsf1 PE=1 SV=2	9	8.83999	9.22867	8.86824	15.3193	13.9722	14.8532		14.7149	8.97897		0.684116	0.21671		0.610196		-0.712656		7.89011e-05	312	0.002014
sp|Q8BX90|FND3A_MOUSE	Fndc3a	Fibronectin type-III domain-containing protein 3A OS=Mus musculus GN=Fndc3a PE=1 SV=3	29	23.8299	20.3381	23.6786	6.99114	6.6939	6.81291		6.83265	22.6155		0.1496	1.97377		3.30992		1.7268		7.96639e-05	315	0.0020141
sp|A2AWL7-3|MGAP_MOUSE	Mga	Isoform 3 of MAX gene-associated protein OS=Mus musculus GN=Mga	2	8.48553	7.07603	7.53821	14.8552	16.1955	15.7712		15.6073	7.69992		0.685017	0.71853		0.493354		-1.0193		7.99893e-05	316	0.00201593
tr|Q4VBW5|Q4VBW5_MOUSE	Exosc7	Exosome component 7 OS=Mus musculus GN=Exosc7 PE=2 SV=1	9	9.17378	7.84143	8.20818	15.83	16.0005	14.9155		15.582	8.4078		0.583467	0.68824		0.539584		-0.890081		8.05444e-05	318	0.00201716
sp|Q9Z2V5|HDAC6_MOUSE	Hdac6	Histone deacetylase 6 OS=Mus musculus GN=Hdac6 PE=1 SV=3	14	10.689	10.2095	10.5063	17.2669	16.063	17.5123		16.9474	10.4683		0.775679	0.242002		0.617692		-0.695041		7.96508e-05	314	0.00202019
sp|Q9JKS4-2|LDB3_MOUSE	Ldb3	Isoform 2 of LIM domain-binding protein 3 OS=Mus musculus GN=Ldb3	1	3.21452	1.4985	3.11749	13.886	16.2612	14.5942		14.9138	2.61017		1.21943	0.963956		0.175017		-2.51443		8.19911e-05	320	0.00204055
sp|Q80ZJ6-2|ZER1_MOUSE	Zer1	Isoform 2 of Protein zer-1 homolog OS=Mus musculus GN=Zer1	1	16.1867	17.1384	15.9927	10.1754	11.0031	10.3651		10.5145	16.4393		0.433612	0.613188		1.56348		0.644761		8.30694e-05	323	0.00204819
sp|Q52KE7-2|CCNL1_MOUSE	Ccnl1	Isoform 2 of Cyclin-L1 OS=Mus musculus GN=Ccnl1	2	7.94073	6.22052	6.40059	16.8725	18.8437	17.5167		17.7443	6.85395		1.00512	0.945479		0.386262		-1.37235		8.29454e-05	322	0.00205148
tr|F6ZBR8|F6ZBR8_MOUSE	Wiz	Uncharacterized protein (Fragment) OS=Mus musculus GN=Wiz PE=4 SV=1	17	8.33191	5.68754	7.26641	17.4939	17.6289	17.6095		17.5774	7.09529		0.0729894	1.33046		0.403659		-1.30879		8.39972e-05	326	0.00205201
sp|Q505F5|LRC47_MOUSE	Lrrc47	Leucine-rich repeat-containing protein 47 OS=Mus musculus GN=Lrrc47 PE=1 SV=1	31	8.351	9.09297	10.1232	16.3636	16.8892	16.4137		16.5555	9.18906		0.290076	0.889999		0.555046		-0.849322		8.38822e-05	325	0.0020555
tr|E9PWT1|E9PWT1_MOUSE	Trrap	Uncharacterized protein OS=Mus musculus GN=Trrap PE=4 SV=1	52	8.96194	8.48213	9.00356	15.8091	15.5568	16.1734		15.8464	8.81588		0.309991	0.289781		0.556332		-0.845982		4.38816e-06	17	0.00205572
tr|Q9ERL0|Q9ERL0_MOUSE	Mllt1	Btk-PH-domain binding protein OS=Mus musculus GN=Mllt1 PE=2 SV=1	2	6.59547	5.04326	5.60591	16.4854	19.0246	18.5196		18.0099	5.74821		1.34416	0.785829		0.31917		-1.6476		8.3646e-05	324	0.00205604
sp|Q9Z2D0|MTMR9_MOUSE	Mtmr9	Myotubularin-related protein 9 OS=Mus musculus GN=Mtmr9 PE=2 SV=2	9	17.3082	19.8611	18.5235	8.53297	8.03643	8.31834		8.29591	18.5643		0.249029	1.27694		2.23776		1.16206		8.29166e-05	321	0.00205716
sp|A2A791|ZMYM4_MOUSE	Zmym4	Zinc finger MYM-type protein 4 OS=Mus musculus GN=Zmym4 PE=1 SV=1	14	8.48042	6.91159	6.58935	17.7257	16.3111	16.8353		16.9574	7.32712		0.715156	1.0117		0.432091		-1.21059		8.80501e-05	340	0.00206244
tr|D3YVV7|D3YVV7_MOUSE	Nova2	Uncharacterized protein OS=Mus musculus GN=Nova2 PE=4 SV=1	2	5.06215	2.70022	5.26834	19.5644	19.0562	17.3367		18.6524	4.34357		1.16745	1.42691		0.232869		-2.10241		8.85745e-05	342	0.0020626
tr|E0CX20|E0CX20_MOUSE	Bud31	Uncharacterized protein OS=Mus musculus GN=Bud31 PE=4 SV=1	4	8.14069	7.14389	7.63022	17.5978	16.1207	15.6714		16.4633	7.63827		1.00786	0.498449		0.463957		-1.10794		8.47547e-05	327	0.00206418
sp|Q9Z2W0|DNPEP_MOUSE	Dnpep	Aspartyl aminopeptidase OS=Mus musculus GN=Dnpep PE=2 SV=2	21	18.8544	18.8414	20.5616	7.85284	8.01301	9.65608		8.50731	19.4191		0.998082	0.989427		2.28264		1.1907		8.84382e-05	341	0.00206546
sp|Q80WE4-3|KI20B_MOUSE	Kif20b	Isoform 3 of Kinesin-like protein KIF20B OS=Mus musculus GN=Kif20b	19	8.20568	8.33199	6.91562	18.2613	17.1285	19.2997		18.2298	7.81776		1.08594	0.783827		0.428844		-1.22147		8.79847e-05	339	0.00206699
sp|Q9CY73|RM44_MOUSE	Mrpl44	39S ribosomal protein L44, mitochondrial OS=Mus musculus GN=Mrpl44 PE=1 SV=3	4	7.40985	8.52097	8.32187	14.7633	16.184	15.9914		15.6462	8.08423		0.770683	0.592454		0.516689		-0.952633		8.77749e-05	338	0.00206816
sp|O88574|SAP30_MOUSE	Sap30	Histone deacetylase complex subunit SAP30 OS=Mus musculus GN=Sap30 PE=1 SV=1	1	6.73792	4.94706	6.02747	21.0288	20.5746	18.1168		19.9067	5.90415		1.56667	0.901776		0.296591		-1.75346		8.92499e-05	343	0.00207226
sp|Q69ZQ2|ISY1_MOUSE	Isy1	Pre-mRNA-splicing factor ISY1 homolog OS=Mus musculus GN=Isy1 PE=1 SV=2	7	9.00074	9.47656	9.07819	15.227	14.0871	15.317		14.877	9.18516		0.685581	0.255311		0.617406		-0.69571		8.77245e-05	337	0.00207311
sp|Q9QXP7|C1QT1_MOUSE	C1qtnf1	Complement C1q tumor necrosis factor-related protein 1 OS=Mus musculus GN=C1qtnf1 PE=2 SV=1	1	24.3183	25.3756	22.3297	8.40106	6.57958	5.22953		6.73672	24.0079		1.59159	1.5465		3.56373		1.83339		8.76209e-05	336	0.00207682
sp|Q6ZPY2|SMG5_MOUSE	Smg5	Protein SMG5 OS=Mus musculus GN=Smg5 PE=2 SV=2	3	8.04683	7.30967	7.50132	15.6132	14.2868	16.0515		15.3172	7.61927		0.918841	0.382473		0.497434		-1.00742		8.97811e-05	344	0.00207854
sp|P50637|TSPO_MOUSE	Tspo	Translocator protein OS=Mus musculus GN=Tspo PE=2 SV=1	2	7.55317	7.68648	9.27589	15.6498	16.1347	15.8495		15.878	8.17185		0.243703	0.95845		0.514665		-0.958295		8.71951e-05	334	0.00207911
sp|Q3TCX3|K0907_MOUSE	Kiaa0907	UPF0469 protein KIAA0907 OS=Mus musculus GN=Kiaa0907 PE=2 SV=1	6	8.79004	8.4501	7.80974	17.5942	15.7645	17.2651		16.8746	8.34996		0.975355	0.497763		0.494824		-1.01501		8.75218e-05	335	0.00208067
sp|Q8C2E4|PTCD1_MOUSE	Ptcd1	Pentatricopeptide repeat-containing protein 1 OS=Mus musculus GN=Ptcd1 PE=2 SV=2	3	6.90661	8.13469	6.59192	14.0295	14.3309	14.8891		14.4165	7.21107		0.436146	0.815204		0.500196		-0.999435		8.71417e-05	333	0.00208407
sp|Q9QZS3-2|NUMB_MOUSE	Numb	Isoform 2 of Protein numb homolog OS=Mus musculus GN=Numb	3	17.0603	18.7883	18.1524	9.56625	8.13877	8.04865		8.58456	18.0003		0.851365	0.873979		2.09683		1.06821		9.05757e-05	346	0.00208481
sp|Q8CFZ4|GPC3_MOUSE	Gpc3	Glypican-3 OS=Mus musculus GN=Gpc3 PE=2 SV=1	4	27.4855	34.4946	34.3362	1.17956	0.541502	0.67987		0.800311	32.1054		0.335647	4.00176		40.1162		5.32611		8.70553e-05	332	0.00208828
tr|E9PXD2|E9PXD2_MOUSE	Dlc1	Uncharacterized protein OS=Mus musculus GN=Dlc1 PE=4 SV=1	9	21.2773	18.8317	19.891	9.94318	10.322	10.5238		10.263	20		0.294773	1.22644		1.94875		0.962548		9.04723e-05	345	0.00208847
sp|Q9WVM1|RGAP1_MOUSE	Racgap1	Rac GTPase-activating protein 1 OS=Mus musculus GN=Racgap1 PE=2 SV=1	17	6.21508	6.97491	4.92573	17.5868	16.7329	18.9391		17.7529	6.03857		1.11244	1.03593		0.340145		-1.55578		9.10764e-05	347	0.00209029
sp|Q99LD9|EI2BB_MOUSE	Eif2b2	Translation initiation factor eIF-2B subunit beta OS=Mus musculus GN=Eif2b2 PE=2 SV=1	12	6.53975	7.43302	6.92385	15.3967	13.8062	14.1001		14.4343	6.96554		0.84629	0.448092		0.482567		-1.0512		8.68777e-05	331	0.00209031
sp|Q8K1H1|TDRD7_MOUSE	Tdrd7	Tudor domain-containing protein 7 OS=Mus musculus GN=Tdrd7 PE=1 SV=1	21	19.3086	17.6737	18.359	10.4902	9.99631	8.98943		9.82531	18.4471		0.764858	0.821003		1.87751		0.908819		9.2131e-05	351	0.0020904
sp|A6X8Z5|RHG31_MOUSE	Arhgap31	Rho GTPase-activating protein 31 OS=Mus musculus GN=Arhgap31 PE=1 SV=1	9	9.77355	9.69007	9.65413	13.1394	13.311	14.066		13.5055	9.70592		0.49296	0.0612668		0.718666		-0.476607		9.37979e-05	357	0.00209245
sp|Q8BKG3|PTK7_MOUSE	Ptk7	Inactive tyrosine-protein kinase 7 OS=Mus musculus GN=Ptk7 PE=1 SV=1	28	8.92132	8.03936	8.34056	21.9195	20.4814	18.9759		20.4589	8.43375		1.47193	0.448304		0.412228		-1.27849		8.61929e-05	328	0.00209281
sp|Q7TN02|MED26_MOUSE	Med26	Mediator of RNA polymerase II transcription subunit 26 OS=Mus musculus GN=Med26 PE=2 SV=1	3	9.00182	7.77183	8.38085	16.9637	15.6026	17.2304		16.5989	8.38483		0.873065	0.615005		0.505144		-0.985234		9.17649e-05	349	0.00209403
tr|E0CY57|E0CY57_MOUSE	Nsmce4a	Uncharacterized protein OS=Mus musculus GN=Nsmce4a PE=4 SV=1	1	8.14934	6.65005	7.9784	14.4269	14.0441	13.9967		14.1559	7.5926		0.235886	0.820732		0.536356		-0.898738		9.20386e-05	350	0.00209427
sp|Q08024-2|PEBB_MOUSE	Cbfb	Isoform 2 of Core-binding factor subunit beta OS=Mus musculus GN=Cbfb	8	8.57265	8.93469	10.409	18.1982	17.2596	17.7354		17.7311	9.30545		0.469315	0.972698		0.52481		-0.930132		8.67904e-05	330	0.00209454
sp|Q8CD10|EFHA1_MOUSE	Efha1	EF-hand domain-containing family member A1 OS=Mus musculus GN=Efha1 PE=2 SV=2	8	19.6071	21.3008	20.0725	9.3217	7.37861	9.65321		8.78451	20.3268		1.22877	0.875018		2.31394		1.21035		9.36639e-05	356	0.00209533
sp|Q8BVE8-2|NSD2_MOUSE	Whsc1	Isoform 2 of Probable histone-lysine N-methyltransferase NSD2 OS=Mus musculus GN=Whsc1	16	8.12621	7.19953	5.96826	19.1728	17.2491	18.3802		18.2674	7.098		0.966801	1.08255		0.388562		-1.36378		9.15829e-05	348	0.00209588
sp|Q9ER88|RT29_MOUSE	Dap3	28S ribosomal protein S29, mitochondrial OS=Mus musculus GN=Dap3 PE=2 SV=1	14	7.4567	8.6397	7.18754	14.3246	14.3794	15.1408		14.6149	7.76131		0.456237	0.772518		0.531054		-0.913071		9.42675e-05	358	0.00209706
sp|O08919|NUMBL_MOUSE	Numbl	Numb-like protein OS=Mus musculus GN=Numbl PE=1 SV=3	5	17.1319	18.2582	19.5251	8.76841	8.60993	7.83155		8.4033	18.3051		0.501448	1.19729		2.17832		1.12322		9.4797e-05	360	0.00209712
sp|O35638|STAG2_MOUSE	Stag2	Cohesin subunit SA-2 OS=Mus musculus GN=Stag2 PE=1 SV=3	32	8.32103	7.38745	7.87416	19.401	17.373	17.2348		18.0029	7.86088		1.21273	0.466932		0.436644		-1.19547		8.66605e-05	329	0.00209776
sp|A2BH40|ARI1A_MOUSE	Arid1a	AT-rich interactive domain-containing protein 1A OS=Mus musculus GN=Arid1a PE=1 SV=1	28	7.86542	7.10595	7.65202	17.5843	17.7512	15.6383		16.9913	7.54113		1.17467	0.39169		0.443824		-1.17194		9.46183e-05	359	0.002099
sp|Q56A08|GPKOW_MOUSE	Gpkow	G patch domain and KOW motifs-containing protein OS=Mus musculus GN=Gpkow PE=2 SV=2	13	9.43498	7.24904	7.83261	17.7991	17.9531	17.0486		17.6003	8.17221		0.483923	1.13185		0.464323		-1.1068		9.33017e-05	354	0.00209902
sp|O35375-2|NRP2_MOUSE	Nrp2	Isoform A0 of Neuropilin-2 OS=Mus musculus GN=Nrp2	7	1.85262	4.00038	2.9093	22.2992	23.147	22.337		22.5944	2.92077		0.478939	1.07393		0.129269		-2.95155		4.22042e-06	16	0.00210072
[truncated: 7,607 more rows]

## Sheet: KOtoWT
			Ratio
Protein annotation	Gene symbol	Protein description	IMP2-KO/Wt
[truncated: 7,964 more rows]
