# Supplementary material for: IGF2 mRNA binding protein-2 is a tumor promoter that drives cancer proliferation through its client mRNAs IGF2 and HMGA1
Source: eLife. 2017 Jul 28;6:e27155. doi: 10.7554/eLife.27155 (PMC5576481; doi:10.7554/eLife.27155)
Supplement: Supplementary file 3. [file elife-27155-supp3.xlsx]

## Sheet: NDa7.prot.txt
Gene	WT	AD	DD	DA	AA	C	DA+AA+C/WT+AD+DD	DA+AA/AD+DD	DA/AD
Igfbp2	85.8	360.6	216.1	1077.1	1166.7	1570.2	5.75698	3.89076	2.98697
Grb14	648.6	1424.7	1262.6	4034.2	4230.3	4444.8	3.80986	3.07539	2.83161
Clca1	1116.4	941.5	298.1	1173.9	1138	6337	3.67101	1.86504	1.24684
Clca2	689.7	591.2	281.3	724.7	761.3	3946.3	3.47734	1.70315	1.22581
Aoc3	830.6	598.1	217.1	761.1	647	3571.1	3.0254	1.72731	1.27253
Sult1a1	508.9	388.6	169.6	438.3	431.4	1953.3	2.64549	1.55804	1.1279
Lcn2	219	2449	83.6	2165.3	4176.5	286.9	2.40903	2.50407	0.884157
Fxyd1	141.8	132.4	19.6	188.3	110.8	397.7	2.37168	1.96776	1.42221
Susd2	153.6	119.3	76.9	169.3	198.8	426.2	2.27073	1.87615	1.41911
Acat3	62	71.6	18.7	79.8	120	133.9	2.19107	2.21262	1.11453
Aqp1	121.2	91.4	66.6	115.8	96.7	394.9	2.1755	1.34494	1.26696
Ptn	83.1	58.4	36.7	90.7	76.4	215.8	2.14871	1.7571	1.55308
Icam5	80.9	79.8	24.4	80.9	90.6	213.6	2.0805	1.64587	1.01378
Phyhd1	1801	1477.8	648.4	1968.2	1679.9	4489.6	2.07214	1.71578	1.33184
Hp	1068.7	2750.8	495.3	2850.4	3733	2290.7	2.05667	2.0281	1.03621
Mylk	422.6	375	172.1	425.3	392.8	1135.9	2.01506	1.49534	1.13413
Steap4	379.6	2386.1	373.7	2240.1	3556.1	528.8	2.01472	2.10022	0.938812
Deptor	170.5	136.7	95.6	161	139.6	489.1	1.96053	1.29402	1.17776
Enpep	12858	9872.6	4252.4	12538.7	10535.3	29431.1	1.94586	1.63356	1.27005
Entpd3	298	180.4	76.3	266.6	211.3	588.7	1.92284	1.86171	1.47783
Selenbp1	694.6	544.4	209.4	678.1	776.9	1279.3	1.88781	1.93022	1.24559
Nme3	143.3	106.3	72.8	144.9	183.5	266.4	1.84491	1.83361	1.36312
Cacna2d3	1470.7	1249.8	588.3	1436.5	1500.2	3151.3	1.83994	1.59768	1.14938
Mtss1l	528.7	409.2	183.7	495.8	389	1151.6	1.81562	1.49233	1.21163
Slc16a2	81.7	76.2	26.2	100.5	103.9	128.2	1.80663	1.99609	1.3189
C3	8342.6	15183.9	3922	16041.2	19312.5	14082.7	1.80106	1.85041	1.05646
Inmt	613.9	501.3	162.2	625.5	587.1	1085.6	1.79912	1.82758	1.24776
Col16a1	195.3	211.4	178.6	225.6	217.3	609.4	1.79788	1.13564	1.06717
Cygb	46.6	37.8	24.4	49.7	46.7	99.1	1.79687	1.54984	1.31481
Serpina3n	326.8	402.8	133.7	368.5	735	437.7	1.78524	2.05685	0.914846
Daam2	849.7	685.4	495.9	750.6	587.5	2271.2	1.7771	1.13274	1.09513
Aox1	89.5	81.6	39.8	109.9	106.9	156.6	1.77051	1.78583	1.34681
Adhfe1	280.6	277.9	164.1	342.7	331.4	598	1.76045	1.52511	1.23318
Vcam1	3945.6	6231.9	1532.7	8208.5	6466.8	5929	1.75952	1.89003	1.31717
H2-Aa	131.2	95.8	36.9	174.9	76.8	211.8	1.75635	1.89676	1.82568
C1qtnf5	314.3	284.4	114.6	338.5	258.1	655	1.75466	1.49524	1.19023
Anpep	4197.8	3302.3	1488.2	4254.1	3507.2	7960.9	1.74919	1.62014	1.28822
Cntnap1	484.3	623	268.9	599.6	898.4	908.3	1.74851	1.67956	0.96244
Fbln7	125.5	91.7	45.3	103.1	66.1	289.7	1.74819	1.23504	1.12432
Gm2a	3124.9	2670	1338.3	3241.6	3049.2	6139	1.74253	1.56944	1.21408
Ggt5	506	392.8	138	477.6	369.1	946.7	1.72975	1.59514	1.21589
Entpd2	517.3	502.3	119.6	549.5	547.1	870.3	1.72656	1.76331	1.09397
Igfbp4	230.2	183.4	136	230.1	185.4	533.3	1.72635	1.30088	1.25463
Tmem26	76.3	63.3	42.3	80.6	60.7	172.7	1.72622	1.33807	1.2733
Igfbp5	636	461.8	218.2	460.5	671.6	1138	1.725	1.66485	0.997185
Gusb	4096.3	4038.7	2261.8	4562.8	4423.8	8947.8	1.72499	1.42633	1.12977
Gulp1	3473.9	2735.3	1682.8	3263.6	2654.3	7683.7	1.72347	1.33947	1.19314
Gstm1	70	85.3	59.5	118.1	100.7	148.4	1.7095	1.51105	1.38453
Rbpms	27.9	25.1	10.4	34.5	46.2	27.5	1.70662	2.27324	1.3745
Aldh6a1	5308.1	4869.7	2344.3	5584.8	5302.8	10445.9	1.70367	1.50923	1.14685
Lrrc58	1060.7	1199.4	1308.6	1245.2	1303.6	3465.3	1.68524	1.01627	1.03819
Gsta4	1903.6	1761.3	773.2	2142	1907	3407.4	1.68009	1.59755	1.21615
Ebf1	32.7	30.7	23.9	34.8	32.4	79.2	1.67698	1.23077	1.13355
Sorcs2	1218.2	1081.1	1084.2	1209	1036.5	3422.6	1.67522	1.03704	1.11831
Tmtc1	980.6	801.8	261.2	939.4	922.5	1556.3	1.67264	1.75155	1.17161
Tenm4	223.7	123.1	59	179.4	145	353.2	1.66979	1.78144	1.45735
Fat4	8281.4	7207	3892	8028.5	7789.4	16453.4	1.66515	1.42516	1.11399
Arsk	713.7	706	376.7	749.5	761.3	1478.2	1.66388	1.3954	1.06161
Fuca1	1655	1572.2	955.6	1800.7	1509.9	3641.1	1.66197	1.30968	1.14534
Manba	146.4	147.3	107.8	163.9	185.8	316.9	1.66027	1.37083	1.1127
Epdr1	2203.1	2156.5	1114.7	2230.3	2185.7	4657.5	1.65747	1.34996	1.03422
Clu	665.9	623.8	220.3	760.7	773.4	968.2	1.65715	1.81744	1.21946
Pygm	136.2	115.5	65.7	118.9	131	275.5	1.65532	1.37914	1.02944
Hexb	3831.7	3478.6	1983.5	3946	3675.8	7736.2	1.6525	1.3954	1.13436
Abca9	38.9	36.2	16.5	33.4	29.2	88.7	1.65175	1.18786	0.922652
Tmem175	166.9	147.9	82.5	178.8	190.7	286.2	1.65039	1.60373	1.20892
Cpq	1361.4	1308.4	779.7	1441.6	1495.4	2745.8	1.64743	1.40654	1.1018
Plxnd1	993.4	947.3	418.3	1087.3	938.5	1856.5	1.64574	1.48345	1.14779
Fam69a	636.3	516	397.1	567.3	565.3	1411.9	1.64225	1.24039	1.09942
Hsd3b7	30.8	42.9	19.1	42.3	43.9	66.2	1.64224	1.39032	0.986014
Dnm1	143.9	143.6	109.2	175.5	168.5	306.9	1.64079	1.36076	1.22214
Irak3	30.1	28	18.1	31.6	39	53.9	1.63386	1.53145	1.12857
Man2b1	1858.3	1894	1220.6	1976.5	1919.9	4209.8	1.63008	1.25101	1.04356
Galc	121.4	119.4	72.4	130.9	140	237.6	1.62356	1.41241	1.09631
Ddah2	2416.5	2150.8	1315.6	2540.9	2651.1	4339.8	1.62026	1.49781	1.18137
P4ha3	2188.7	2168.7	1360.5	2270	1876.4	5111.7	1.61914	1.17488	1.04671
Sfxn5	215.1	206.8	122.3	236.3	254	388	1.61393	1.48982	1.14265
Reps2	319.6	253.2	122.7	290.3	292.6	532.7	1.60403	1.55068	1.14652
Cp	2906.8	3264.7	1104.9	3143.8	5740.9	2784.9	1.60376	2.0333	0.962968
Creg1	599.2	532.5	271.2	615.5	569.2	1063.7	1.60268	1.47406	1.15587
Rab3il1	1638.7	1248.1	717.6	1655.1	1170.1	2937.5	1.5988	1.43725	1.3261
Fggy	272.8	248.4	130.9	278.4	287.4	476	1.59761	1.4917	1.12077
Adck3	83.2	78	30.4	81.5	81.8	142.7	1.59708	1.50646	1.04487
Naga	8589.3	7849.9	3602	8742.7	8266.6	14897.2	1.59205	1.48528	1.11373
Cirbp	841.1	778.1	468.2	875.2	800.9	1647.1	1.59203	1.34486	1.12479
Hexa	3448.8	3255.9	1837.4	3844.6	3472	6277.6	1.59144	1.43651	1.18081
Gpm6b	1444	1482.6	476.2	1420.9	1882.3	2112	1.5914	1.68634	0.958384
Synm	1463.5	1374.5	733.8	1611.6	1311	2755.9	1.58981	1.38624	1.1725
Pgap3	71.5	60.9	52.1	66.6	106.9	118.7	1.58374	1.5354	1.0936
Sdr39u1	648.8	558.2	324	687.7	651.7	1085	1.58354	1.51825	1.232
Glb1l	1030	920.6	448.4	1088.3	985.1	1715.2	1.57924	1.51454	1.18216
Hsd17b8	519.2	489.4	286.2	558.9	592.5	892.2	1.57831	1.48453	1.14201
Slc27a1	719	677.5	494.3	816.4	803.3	1361.9	1.5769	1.38223	1.20502
Ttc7b	812.9	715.2	345.2	809.9	903	1237.3	1.57487	1.61533	1.13241
Csad	2171.6	2114.5	1100.4	2405.8	2288.3	3778.7	1.57297	1.46011	1.13776
Gxylt2	169.8	128.7	108.8	164.3	161.9	314.1	1.57206	1.37347	1.27661
Gpr116	109.3	82.4	43	97.5	86.4	184.5	1.56966	1.46651	1.18325
Igdcc4	1130.5	1054.4	627.8	1232.1	1259.1	1918.7	1.56785	1.48092	1.16853
Dpep1	178	204.3	421.1	183.2	318.1	753.4	1.56174	0.801567	0.896721
Mfi2	769.2	642.5	332.9	767.7	590	1366.6	1.56156	1.39194	1.19486
Acad10	1948.6	1826.7	1118.6	2125.5	2187	3310.8	1.55771	1.4642	1.16357
Me3	294.6	290.5	154	299.2	347.4	494.9	1.54445	1.45467	1.02995
Man2b2	4068.5	3951.2	2344.8	4282.7	4396.4	7318.7	1.54352	1.37851	1.0839
Naglu	4283.5	4040.4	2270	4614.6	4286.7	7440.4	1.54256	1.41058	1.14211
Scara5	2096	1453.6	814	1809.1	1691.5	3228.2	1.54203	1.54375	1.24457
Naprt1	342.7	321.3	202.3	360.1	377.1	597.9	1.54115	1.40794	1.12076
Fuca2	1358.9	1299	887	1502.4	1240.5	2714.5	1.53951	1.25476	1.15658
Sord	3176.2	2816.2	1741.8	3481	2631.5	5773.6	1.53682	1.34105	1.23606
Rit1	191.8	179.2	129	179.1	216.1	373	1.5364	1.28228	0.999442
Ndrg1	2093.4	1989.5	1742.3	2400.3	2355.4	4189.3	1.53557	1.27437	1.20648
Prkcdbp	1651.1	1506.5	672.7	1752.3	1475.7	2646.1	1.53359	1.48128	1.16316
Arsa	951.8	949.3	591.1	1117.6	1024.9	1675.4	1.53194	1.39087	1.17729
Sdc3	64.6	80.7	117.7	108.8	105.9	188	1.53118	1.08216	1.3482
Dpp7	1071	1049.8	620.8	1181.8	1028.2	1983.5	1.52958	1.32288	1.12574
Lin7a	84.4	84.8	50.6	109.7	109.5	116	1.52502	1.61891	1.29363
Sphk1	342.9	391.8	231.1	452.9	523.2	495.5	1.52371	1.56703	1.15595
Kctd12	2358.3	1883	829.7	2340	1627	3754.6	1.5227	1.46238	1.2427
Ptpn13	2063	2012.5	947.5	2169.4	2486.5	2989.5	1.52208	1.57294	1.07796
Siae	317.2	341.8	245.1	358.2	349.2	668.5	1.52184	1.20532	1.04798
Sspn	69.6	64	38.9	66.9	76.7	118.8	1.52116	1.39553	1.04531
Fbxo2	435.6	391.3	193.7	431.4	378.5	739.8	1.51842	1.38444	1.10248
C1ra	639	741.5	352.7	817.7	922.2	889.1	1.51685	1.59011	1.10276
Cdnf	405.1	343.7	169.7	445.8	417.1	526	1.51214	1.68076	1.29706
Tspan18	52	31.9	32.9	48.2	23.4	105	1.51199	1.10494	1.51097
Nrcam	497.8	323.8	105.1	414.5	462.9	522.7	1.51084	2.0457	1.28011
Cpm	318.5	336.9	347	465.2	391.1	658	1.51067	1.25208	1.38083
Gstm1	7446.1	6596.5	4553.4	7782.7	7173.5	13134.7	1.51059	1.34138	1.17982
L3hypdh	1907.5	1908.1	1162	2158.5	2032.6	3320.4	1.50906	1.36513	1.13123
Dysf	80	77.2	84.5	134.4	88.5	140.5	1.50352	1.37848	1.74093
Ggh	1344.8	1461.4	1226.6	1596.8	1435.7	3012.9	1.49906	1.12816	1.09265
Ctsf	1065.3	1067.6	550.1	1109.1	1026.4	1874.3	1.49452	1.32008	1.03887
	283.2	260.5	200.9	319.3	357.7	435.6	1.49423	1.46727	1.22572
Glb1	3951.4	3773.8	2262.7	4147.7	3995.4	6745.1	1.49062	1.34898	1.09908
Fth1	3059.1	2138.1	819.7	2546.8	4086.5	2303.6	1.4853	2.24265	1.19115
Anks3	599.3	595.9	369.1	673.4	657.9	991.1	1.48463	1.37959	1.13006
Man2a2	824.3	763.3	432.3	897.5	874.5	1226.6	1.48453	1.4821	1.17582
Prkar2b	2546.2	2233.1	1563.6	2691.7	2519.5	4199	1.48358	1.37256	1.20536
Gns	9012.2	8808.2	5036.7	10125.9	9247.6	14531	1.48332	1.39932	1.1496
Mertk	182	132.6	76.7	173	133.6	273.8	1.48326	1.46488	1.30468
Col12a1	33576.2	34533.3	28048.8	36074.6	31620.5	74803.4	1.48192	1.0817	1.04463
Ccbl1	249.2	243.7	178.6	269	297.3	427.7	1.48027	1.34099	1.10382
Crocc	207.2	194.7	143.9	229	222.2	356.7	1.48021	1.33255	1.17617
Efna5	56.2	47	42.5	60.5	72.2	82.8	1.47907	1.48268	1.28723
Cyp7b1	229.5	412.3	131.5	377.8	404.3	358.6	1.47511	1.43821	0.916323
Mgst1	367.8	470.4	217.6	440.4	734.3	380.6	1.4731	1.70741	0.936224
Pcmtd1	496.9	401.7	254.7	476.9	384.5	837.5	1.47308	1.31231	1.1872
Ctso	232	247.6	127.9	280	277.2	337.3	1.47243	1.48389	1.13086
Dync2h1	1443	1576.3	1528.5	1616.6	1680.9	3398.8	1.47243	1.06207	1.02557
H1f0	8505.7	8418.5	6755.4	8860.5	8266.9	17731.5	1.47211	1.12874	1.0525
Rapgef4	146.5	125	77.5	176.7	212.8	124.1	1.47163	1.92346	1.4136
Pts	1451.7	1290.1	788.1	1610.8	1421.5	2161.7	1.47143	1.4591	1.24859
Acad12	519.3	487.3	263.4	543.7	522.5	802	1.47102	1.42027	1.11574
Akr1c14	1584.5	1519.4	925.1	1716.2	1849.3	2353.6	1.46912	1.45858	1.12952
Colec12	5693.5	4672.6	3656.7	5281.9	4688.9	10601.8	1.46708	1.19708	1.1304
Mecp2	1769.9	1663.9	943.9	1751.7	1806.7	2863	1.46684	1.36452	1.05277
Phpt1	1082.5	1067.1	942.3	1316	1278	1938.3	1.46586	1.29093	1.23325
Lix1l	1016.9	981.1	637.3	1046.2	1038.7	1775.9	1.46503	1.28825	1.06635
Tmem205	223.1	212.8	118.1	233.8	263.6	313.3	1.46336	1.50317	1.09868
Sat2	278.7	245.4	164.3	258	304.2	444.1	1.4618	1.37222	1.05134
Rmdn1	1303.1	1265.6	798.5	1364.4	1402.5	2148.4	1.45976	1.34049	1.07807
Egfr	7094.6	7695.3	5282.7	8258.3	7414.6	13622.4	1.45947	1.20765	1.07316
Fam63b	520.4	474.3	258.7	517.8	547.9	762.4	1.45851	1.45389	1.09171
Endog	1393	1379.9	1006.6	1618.2	1528.6	2358.5	1.45662	1.31858	1.17269
Fgf14	369.4	376.9	343	558.7	524.3	503.4	1.45635	1.50438	1.48236
Cryl1	408	409.6	371.1	512.1	470.6	748.4	1.4563	1.25874	1.25024
Sarm1	110.9	104.8	73.6	124.6	113.1	183.4	1.45558	1.3324	1.18893
Tmem256	152.6	134.7	95.2	169.4	175	212	1.45464	1.49804	1.25761
Aldh1a1	17246.5	14506.2	5919.6	16307.5	18689.1	19797.7	1.4545	1.71335	1.12417
Pitpnc1	177.7	216	144.9	207.4	259.4	314.9	1.45136	1.29343	0.960185
Ncam1	141.4	158.1	146.2	166	155.5	324.6	1.44963	1.05652	1.04997
Chadl	28.1	32.8	22.2	39	42.3	39.1	1.44886	1.47818	1.18902
Kctd12b	516.5	406.8	275.3	478.7	429	828.4	1.44844	1.33074	1.17675
Abat	5028.7	4998.7	1860	5287.4	5289.4	6633	1.44773	1.5421	1.05776
Oplah	2488.9	2344.8	1444	2665.8	2698.5	3723.9	1.4477	1.41583	1.1369
Cbr2	6930	7154	4564.8	7906.4	7931.3	11159.5	1.44766	1.35148	1.10517
Ctsz	670.5	664.3	444.8	737.1	694.2	1143.7	1.44695	1.29051	1.10959
Figf	461.6	409	290.4	417.3	500.9	759.4	1.44496	1.31284	1.02029
Pid1	693.9	640.2	437.5	687.7	665.8	1205.3	1.44434	1.25592	1.0742
Rnasel	639.6	558.5	388.6	726.5	728.4	835.7	1.44363	1.53616	1.30081
Phka2	1580	1465.2	995.5	1663.9	1768.9	2395.7	1.44245	1.39505	1.13561
Ogn	4698.7	3649.4	3114.1	4000.6	3366.9	9152.5	1.44126	1.0893	1.09623
Prcp	886.1	933.3	997.1	992.6	906.8	2158.5	1.44076	0.983941	1.06354
Sorcs1	891.5	801.4	452.9	1040.3	822.4	1225.6	1.43923	1.48505	1.2981
Ganc	662	624.4	391.7	644.8	697.2	1072.1	1.43859	1.32074	1.03267
Cdh11	1892.5	1445.9	986.1	1899.7	2078.9	2233.5	1.43649	1.63594	1.31385
Aldh3a1	1726.7	1610.4	1005.1	1695.1	1753.3	2789.1	1.43648	1.31845	1.0526
Maob	786.2	835.2	428.8	818.5	1138.8	987.7	1.43645	1.5485	0.980005
Rassf2	2661.4	2831.6	2125.8	3186	3014.4	4742.1	1.43625	1.25074	1.12516
Manba	46	50.5	36	53.4	56.7	80.2	1.43623	1.27283	1.05743
Nudt16	1153	1090.1	734.8	1234.9	1271.8	1769	1.43581	1.37361	1.13283
Rbl2	381.4	387.6	245	445	450.9	558.2	1.43402	1.41622	1.14809
Bphl	4971	4810.7	2711.9	5109.5	5242.1	7502.7	1.42908	1.37607	1.06211
Uggt2	5432	5907.7	4047.9	5994.9	6318.7	9661.4	1.4281	1.23685	1.01476
Auh	1662.1	1655.8	961.3	1816.3	1990.2	2304	1.42795	1.45447	1.09693
Slc24a3	127.5	98.3	57.8	118.8	133.2	152.8	1.42736	1.61435	1.20855
Gstt1	2529.6	2411.6	1436	2762.9	2798.5	3535	1.42639	1.44542	1.14567
Tmem173	60.9	84.3	107.2	75.7	75.5	208.5	1.42512	0.789556	0.897983
C1sa	958.1	1316	818.7	1478.3	1596.2	1333.1	1.42512	1.44025	1.12333
Acaa2	4664.3	4361.6	3275.9	5065.4	4441.7	8023	1.425	1.24479	1.16136
L7rn6	240.7	216.5	174.1	279.3	269.8	349.8	1.42389	1.40579	1.29007
Pdcd4	3347.6	3216.9	1899.4	3578.6	3378.9	5086.9	1.42303	1.35987	1.11244
Mpv17	952.2	946.1	714.2	1126	1085.4	1504.7	1.42243	1.33193	1.19015
Macrod1	1532.3	1806.5	1087.8	1835.5	1963.8	2497	1.42238	1.31268	1.01605
Angptl4	54.7	73	25.6	70.9	76.2	70.9	1.42205	1.49189	0.971233
Ccny	673.6	645	416.3	720	775.2	970.6	1.42129	1.40884	1.11628
Bdh2	81.3	80.2	31.9	82.9	61.8	130.1	1.42089	1.29081	1.03367
Acyp1	1043.1	985.1	697.8	1171.7	1076.3	1616.3	1.41757	1.33579	1.18942
Fabp4	3173.9	3219.2	2372.5	3800.8	3118.3	5501.8	1.41701	1.23739	1.18067
Fam102b	1176.1	1031.7	631.6	1217.7	1006.8	1798.8	1.41695	1.3374	1.18028
Rab6a	114.5	105.8	68.1	138.1	131.6	138.9	1.41678	1.55089	1.30529
Athl1	1536.6	1463.6	907.3	1721.3	1681.1	2132.1	1.41638	1.43507	1.17607
Robo2	1541.5	1629.2	728.4	1706.8	1892.2	1905.2	1.41166	1.52655	1.04763
Pbld2	69.4	76.1	58.8	76.3	81.2	130.7	1.41067	1.16753	1.00263
Ldhb	9249.5	6509.3	3460.5	8102.4	7619.6	11384.7	1.41039	1.57696	1.24474
Arsb	4856.6	4574	3099.4	5525.9	4732	7408.6	1.40994	1.33681	1.20811
Eci1	4194.9	4107.7	2951.6	4537.5	4443.1	6878.2	1.40915	1.27217	1.10463
Cacna2d1	937.3	980.4	718.8	1015.1	1093.5	1600.5	1.40683	1.24094	1.03539
	718.2	716.5	409.2	792.1	801.6	999.6	1.40642	1.41574	1.10551
Gpc6	3294.8	3189	1802.9	3273.5	4116.9	4260.6	1.40599	1.48048	1.0265
Col14a1	206.4	228.6	184	224.2	225.2	420.5	1.40533	1.08919	0.980752
Gaa	6755.2	5963.1	4068.1	7509.8	6572.4	9498.7	1.40476	1.40384	1.25938
Appl2	3080.4	2834.7	2454.5	3260.2	2837.8	5659	1.40473	1.15292	1.1501
Efhc1	130.1	102.7	75.1	123.3	109.3	199.8	1.40435	1.30821	1.20058
Bicc1	932.7	965.5	691	1040.1	1021.6	1573.6	1.40402	1.24461	1.07727
Sgcd	2539.5	2399.9	1671.8	2734.5	2412.7	4130.8	1.40338	1.26414	1.13942
Lgmn	926.1	904.6	541	1007	898.7	1420.5	1.40245	1.31828	1.1132
Hdgfrp3	2954.3	2642.1	1557.5	3006.5	2734	4289.4	1.40202	1.36692	1.13792
Zfp37	30.8	39.2	24.4	35.1	35.7	61.5	1.40148	1.11321	0.895408
Mcee	107.5	90.4	59.4	106.4	123.9	130.3	1.40148	1.53738	1.17699
Pc	14832	14685.9	7426.1	16195.7	16487.3	19060.3	1.40059	1.47807	1.10281
Tmem143	611.8	645.8	443.9	670.4	748.4	963.4	1.40006	1.30201	1.03809
Aldh3b1	1148	1065.7	552	1114.9	1528.2	1228.7	1.39993	1.63386	1.04617
Ppp3cc	225.1	224.3	206.9	237.8	285.8	395	1.39966	1.21429	1.06019
Cfh	101.2	121.2	66.6	102.2	125.1	177.2	1.39965	1.21033	0.843234
Cers1	78.3	70.6	48.8	79.4	82.6	114.6	1.39909	1.35678	1.12465
Aldh7a1	8460.2	8282	4884.6	9089.9	8997.6	12158.3	1.39853	1.37374	1.09755
Fcgrt	941.3	896.2	568.6	1061.9	828.2	1474.6	1.3984	1.29035	1.18489
Ptk7	4142.1	4132.1	2875.2	4396	4689.3	6499.3	1.3978	1.29655	1.06387
H2-M10.5	255	293.3	198.5	373.4	387.1	282.9	1.39716	1.54636	1.2731
B4galt4	113.3	111	66.6	115.2	130.5	160.6	1.3967	1.38345	1.03784
Pvrl2	496.6	589.6	338	565.3	834.6	588.6	1.39622	1.50916	0.958786
Slc2a13	143.5	162.5	114.5	168.1	188	231	1.3962	1.28556	1.03446
Thnsl2	1555.6	1416.1	901.1	1600.8	1591.7	2212.7	1.39568	1.37774	1.13043
Sod2	4226.4	5477.2	2842.9	5806	7302.6	4401	1.39558	1.57553	1.06003
Gli1	74.3	67.3	46.5	76.9	96.7	88.9	1.39553	1.52548	1.14264
Phkb	3702.4	3480	2198.5	3762.3	3850	5477.3	1.39535	1.34055	1.08112
Sfxn3	3455.4	3490.1	2213.3	3813.8	3925.8	5035.7	1.39487	1.35702	1.09275
Phf1	339.7	320.4	224.8	343.7	356.3	533.4	1.39383	1.28393	1.07272
Plbd2	3360.7	3144.7	1955.6	3571	3534	4679.6	1.39281	1.39306	1.13556
Gypc	226.5	176.8	90.1	163.4	309.5	213.2	1.39056	1.77182	0.924208
Sts	2096.4	2089.2	1497.6	2294.6	2502.3	3098.4	1.38923	1.33738	1.09832
Ermp1	1044.5	1078.5	935.7	1198.9	1159	1890.7	1.38902	1.17064	1.11164
Tmem35	210.2	203	149.6	217.6	246.3	317.3	1.38806	1.31566	1.07192
Gstm5	4338.5	3987.9	2365.8	4190.1	4248.8	6394.2	1.38728	1.32819	1.0507
Ctsa	3378.5	3374.1	2354.6	3771.7	3218.9	5642.9	1.3872	1.22028	1.11784
Gstz1	3219.9	3013.4	2103.9	3565.1	3338.7	4654.5	1.38635	1.34911	1.18308
Ptgr2	2508	2339.3	1334.9	2697.2	2522.3	3348.3	1.38588	1.42058	1.15299
Scamp5	67.9	61.2	37.8	62.3	67.6	101.4	1.38586	1.31212	1.01797
Tk2	254.5	237	152.2	263.6	315.2	313	1.38543	1.48715	1.11224
Zfp36l1	25.4	34	18.7	39.4	36.3	32.5	1.3854	1.43643	1.15882
Mical3	775.4	757.6	576.8	770.4	878.9	1272.3	1.38478	1.23599	1.0169
Pla2g15	1763.9	1905.1	1064.6	1890.5	2008.3	2655.7	1.38468	1.31286	0.992336
Matn4	158.6	131.3	89.3	137.9	131.4	255.7	1.38449	1.22076	1.05027
Iah1	2342.7	2276.4	1458.6	2527.4	2505.5	3377.1	1.38375	1.3475	1.11026
Cbr4	2433.7	2175.1	1409	2420.7	2694.5	3210.7	1.38355	1.42719	1.11291
Acy3	807.4	732.9	487.7	859.7	938.4	1006.9	1.38314	1.47313	1.17301
Lrpap1	8826.7	8694.1	5995.9	9748.3	9244.6	13526.7	1.38283	1.29291	1.12125
Nebl	964.2	979.2	807.1	1075.1	986.8	1740.5	1.38244	1.15429	1.09794
Apbb1	34.6	38.7	37.1	53.3	57.1	42.2	1.38225	1.45646	1.37726
Alkbh7	81.3	85.7	62.3	89.5	109.4	117.9	1.3816	1.34392	1.04434
Dennd2a	343.9	337.4	210.9	346.3	352.2	533.3	1.38063	1.27394	1.02638
H2-Q8	59.8	57.1	57.4	96.9	102.9	40.8	1.38038	1.74498	1.69702
Mmab	1263.7	1265.8	841.1	1391.7	1337	1923.8	1.38032	1.29513	1.09946
D10Jhu81e	5801.9	5826.6	3641	6348.6	5908.6	8817.3	1.38017	1.29465	1.08959
Dguok	892.6	871.7	595.5	952.7	1037.7	1265.8	1.37986	1.3566	1.09292
Slit3	180.7	190.8	116	171.5	249.1	251.9	1.37949	1.37093	0.898847
Accs	427	395.8	260.8	455.2	442.3	597.2	1.37938	1.36689	1.15008
Stab1	57.6	64.9	50.8	62.2	79.4	97.3	1.37853	1.22385	0.958398
Hykk	1876.2	1741.7	1306.1	2002	1947.1	2835.8	1.37792	1.29572	1.14945
Lyplal1	1426.7	1418.7	1169	1670	1627.8	2232.5	1.37762	1.27441	1.17713
Slc25a42	312.5	284.4	162.8	306.6	328.8	410.6	1.37686	1.42084	1.07806
Cryz	3642	3570.9	2525.5	4333.8	3788.1	5277.7	1.37595	1.33225	1.21364
Map2k6	262.6	296.9	266.9	311.9	248.9	576.2	1.37585	0.994679	1.05052
Nthl1	40.1	41.5	30	46.9	49.2	57.4	1.37545	1.34406	1.13012
Aldh4a1	2123.9	2179.8	1316.3	2400	2552.7	2777.3	1.37544	1.41664	1.10102
Rad1	66.9	70	61.5	69.6	69.3	133.8	1.3745	1.05627	0.994286
Nme4	1120.5	1004.5	736.6	1162.4	1191.7	1577.8	1.37402	1.35208	1.15719
Plec	139	138.5	98.4	148.4	151	216.6	1.37271	1.26382	1.07148
Sema3b	111.6	120.6	60.3	129.1	140.9	131.5	1.37265	1.49254	1.07048
Atxn1	51.8	49.6	34.9	62.2	53.9	70.8	1.37124	1.37396	1.25403
Slc25a35	366.4	357.6	190.8	370.3	436.3	447.5	1.3709	1.47082	1.03551
Mccc2	2872.3	2947.7	1967.8	3030.2	3066.5	4572	1.36992	1.2403	1.02799
Dhtkd1	2428.7	2340.9	1290.6	2504.8	2492.1	3304.4	1.36981	1.37599	1.07002
Kif13b	6902.9	6818.7	4932.1	7065.6	6530.4	11937.6	1.36882	1.15703	1.03621
Uros	542.5	506.7	387.7	579.5	588.9	796.4	1.36739	1.30635	1.14367
Fah	4127.1	3671.1	2398	4251.1	3929.7	5759.9	1.36724	1.34794	1.15799
Cacna1h	389.9	414	289.2	439.8	417	637.6	1.36712	1.21843	1.06232
Dclk3	24.9	42.4	35.2	47.9	51	41.2	1.36683	1.27448	1.12972
Adcy9	224.1	199.7	147.1	212.2	239.7	328.4	1.36679	1.30306	1.06259
Creb3l1	69.8	74.6	61.9	83.1	94.8	103.9	1.36597	1.3033	1.11394
D2hgdh	835.9	810.5	513.4	848	892.4	1209.5	1.36582	1.3146	1.04627
Smarca2	2406.3	2412.4	1823.9	2527.5	2391.4	4145.1	1.36453	1.16113	1.04771
Hrsp12	3697.5	3326.2	1731.8	3785	4006.5	4150.1	1.3639	1.54043	1.13794
Clybl	3544	3593.6	2399.8	3889.8	3757.2	5358.8	1.36366	1.2759	1.08242
Gstt3	3523.4	3324.4	2278.8	3804.6	3777.1	4862.4	1.3635	1.3531	1.14445
Cgnl1	728.9	1542.5	891.4	1492	1618.9	1200.6	1.36319	1.27815	0.967261
Pygb	15815.5	14655.7	10241.9	16475.6	14709.8	24303.3	1.36292	1.25255	1.12418
Acsf2	4040.6	4165.5	2919.3	4503.7	4279.7	6372.8	1.36231	1.23975	1.08119
Bbs4	93	86.2	67.4	87.9	109.6	138.3	1.36172	1.28581	1.01972
Kank4	186.1	192.7	203.7	197.8	234.8	360.6	1.36172	1.09132	1.02647
H2afy2	4668.2	4583.9	3430.7	4874.5	4665.8	7717.7	1.36074	1.19037	1.0634
Itpr2	4905.8	5038.2	3444.3	5167.7	5778.2	7271.7	1.36071	1.29041	1.0257
Pcca	7431.5	7340.6	5183.7	7902.8	8245	10994.6	1.36013	1.28932	1.07659
Tasp1	562.8	555.5	439.4	589.9	575.8	952.9	1.36008	1.17168	1.06193
Snx29	682.3	746	544.1	778.6	842	1061.1	1.35961	1.25618	1.0437
Extl2	829.1	807.9	546.9	901.9	903	1162.1	1.35858	1.33223	1.11635
Dnase2	683.4	670.1	479.9	740.1	639.1	1111.4	1.35846	1.1993	1.10446
Ak5	993.1	932.8	816.7	1086.2	1070.8	1565.3	1.35722	1.23292	1.16445
Tha1	895.9	809.4	382.5	902.2	1009.3	920.5	1.35645	1.60374	1.11465
Mt2	409.6	1287.2	417.9	1024.7	1263.5	579.4	1.35603	1.34197	0.796069
Zadh2	2608.4	2589.3	1842.5	2777.8	2570.8	4193.7	1.3554	1.20687	1.0728
Pdpr	4345	4212	2538.8	4557.9	4371.7	6103	1.3548	1.32275	1.08212
Purg	68.7	56.6	35.5	76	78.6	63.2	1.35448	1.67861	1.34276
Lxn	1970.2	1923.6	1218.3	2112.2	2714.6	2088.8	1.35279	1.53627	1.09805
Lyrm5	308.6	300.3	214.8	335.4	346.2	432.6	1.35268	1.32324	1.11688
Vmac	203.3	156.1	113.5	170.4	187.4	281.8	1.35251	1.32715	1.09161
Lancl1	1696.4	1640.7	1194.7	1855.5	1773.8	2497.9	1.35205	1.28	1.13092
Mpc2	2228.8	2284.4	1411.6	2429	2321.2	3256.7	1.35142	1.28523	1.0633
Wasf3	60.8	59.4	49.9	68.9	81.1	79.8	1.35097	1.37237	1.15993
Rmdn2	1238.4	1225.6	669.4	1316.5	1413.6	1498.7	1.34959	1.44069	1.07417
Ogdhl	4657.6	4626.6	2576.7	5309.2	4896.1	5799.3	1.34936	1.41675	1.14754
Picalm	330.9	445.8	403.2	519.1	484.5	587.5	1.3485	1.1821	1.16442
Smap2	1339.2	1299	989.4	1465.9	1444.1	1979.5	1.34786	1.27163	1.12848
Rps6ka5	980.8	920.5	961.9	1000.5	1005.4	1852.7	1.34765	1.06561	1.08691
Pccb	4032.8	4121.4	2568.9	4180.9	4274.6	5994.9	1.3476	1.26384	1.01444
Tmem258	92.8	77.5	78	90.1	107.4	137.1	1.34756	1.2701	1.16258
Sesn3	660.3	530.2	442.5	628.4	632.1	939.4	1.34715	1.29588	1.18521
Itga2	2468.5	2441.7	2184.2	2713.3	2421.9	4420.1	1.34688	1.1101	1.11123
Acss3	2239.4	2099.5	1186.5	2181.8	2523.4	2736.4	1.3468	1.43189	1.0392
Rbbp9	3453.8	3365.6	2278.5	3932.5	3498.2	4821.8	1.34674	1.31654	1.16844
Smpdl3a	835.8	811.3	553.8	879.4	863.9	1219.5	1.34618	1.27705	1.08394
Cyb5r2	159.6	153.9	88.9	171.5	169	201.2	1.34617	1.40239	1.11436
Sgce	1540	1430.6	918.5	1470.5	1462.3	2300.7	1.34568	1.24848	1.02789
Gmcl1	36.2	48.2	33.1	50.1	61.1	46.9	1.34553	1.36777	1.03942
Sh3pxd2b	5611.5	6038	3961.3	6444	6351.4	8205.8	1.3453	1.27963	1.06724
Dync2li1	252.2	257.8	196.8	271.3	279.6	399.6	1.34479	1.21183	1.05237
Tbc1d2b	3332.4	3457.8	2682.6	3786.6	3199.4	5752.8	1.34478	1.13771	1.09509
Cd14	1433.4	1679.7	1120.7	1730.9	2704.3	1256.3	1.3443	1.58377	1.03048
Dtnb	1303.7	1332	971.7	1366.8	1521.6	1959.7	1.34393	1.25381	1.02613
Hnrnph3	947.7	874.7	737.9	1041.8	950.3	1447.4	1.3434	1.23533	1.19104
P2rx4	1476.3	1657.8	816.1	1816.3	1680.5	1808.2	1.34297	1.41348	1.09561
Fas	307.2	460.3	213.3	438.3	584.1	294.6	1.34278	1.51781	0.952205
Mpc1	385.9	387.7	232.3	386.5	422.4	541.7	1.34268	1.30468	0.996905
Ppap2b	1686.3	2022.9	992.1	1878.5	2391	2042.2	1.34254	1.41609	0.928617
Ndufab1	369.5	340.3	329.2	422	549.9	422.6	1.34216	1.45168	1.24008
Pdk1	1357.5	1552	918.6	1467	1695.5	1972.6	1.34142	1.28005	0.945232
Fastkd1	144.4	155.2	145.1	199.8	251.4	145.2	1.34113	1.5025	1.28737
Isoc2a	1061.3	996.5	658.6	1094.8	1102.7	1445.2	1.341	1.32771	1.09865
Gstm2	7797.6	7276.2	4377.1	7961.2	7719.5	10394	1.34054	1.3456	1.09414
Plekhf1	1087.9	1247.3	827.4	1289.8	1234.9	1712	1.33963	1.2169	1.03407
Nhs	29.4	33	23.9	36.1	34.8	44.7	1.33951	1.24605	1.09394
Fdxr	2731.6	2504.5	1827.5	2793.4	2569.5	4093.5	1.33875	1.23797	1.11535
Idh1	17947.4	18510.9	13123.3	20340.4	18760.5	27255.9	1.33834	1.23603	1.09883
Smpd3	453	484.6	345.5	495.5	466.7	754.8	1.33817	1.15914	1.02249
B9d1	39.6	31.5	24.2	34.1	40.3	53.1	1.33788	1.33573	1.08254
Ctbs	494.6	527.1	435.4	542.7	519.7	886.3	1.33738	1.10379	1.0296
Acadm	8870	8357.2	6154.2	9400.2	8808.1	13051.8	1.33696	1.25476	1.1248
Naalad2	1358	1379.6	1068.3	1460.4	1508.8	2115	1.33587	1.21296	1.05857
Wbscr27	192.2	176.2	83.2	177.8	176	249.2	1.33525	1.36392	1.00908
Akr1c13	2108.3	2436.3	1627.6	2714.2	2866.3	2658.3	1.33482	1.37319	1.11407
Cdk19	77.1	84.7	50.5	88.1	88.6	106.4	1.33349	1.30695	1.04014
Aamdc	997	932.9	755.4	1085.5	997.6	1494.7	1.33237	1.23384	1.16358
Slc44a2	2692.1	2672.1	1740.6	2823.6	2817.3	3824.7	1.33228	1.27833	1.0567
Sardh	4221.3	4150.8	2838.4	4642.1	4410.3	5873.4	1.33141	1.2952	1.11836
Bnip3l	105.6	116.8	65.9	119.1	124.1	140.1	1.32952	1.33114	1.01969
Arl15	606.2	635.6	498.1	737	882.9	692.7	1.32916	1.42886	1.15953
Carkd	3253.6	3195.2	2186.8	3580.8	3675	4221.8	1.3291	1.34816	1.12068
Ttc28	3034.7	3186.5	2203.3	3300.1	3190.4	4702.9	1.32867	1.20422	1.03565
Klhl24	133.3	124.6	78.1	147	178.4	121	1.32857	1.60533	1.17978
Dysf	2612.8	2976.4	2713.5	2953.1	3201.9	4873.2	1.32827	1.08174	0.992172
Fam98c	122.8	117	95.6	136.3	142.6	166.6	1.32826	1.31185	1.16496
Adck1	819.5	797.4	547.1	912.4	901.7	1059.4	1.32787	1.34927	1.14422
Sgcb	2371.4	2426.5	1725.5	2645.3	2232.5	3782.2	1.32753	1.17481	1.09017
C1rl	571.2	532.5	254.4	573.4	601	628.1	1.32722	1.49244	1.07681
Plin4	17842.7	16541	11026.2	19060.1	16071.5	25120.5	1.32685	1.2744	1.15229
Arvcf	824.9	776.9	586.3	796.1	969.4	1136.7	1.32636	1.29511	1.02471
Fam69b	327.5	327.9	212.4	355.4	327.4	468	1.32611	1.26374	1.08387
Gas1	2951.9	2144.5	1575.9	2687.8	1984	4172.4	1.32551	1.25573	1.25335
Lamp2	8184.3	6902.5	4252.2	8706.5	7164.2	9761.2	1.3254	1.42278	1.26135
Ctsh	3820.1	4178.3	3425.2	4847.5	4343.1	5949.1	1.3253	1.20873	1.16016
Il1r1	357.4	474.9	271.7	466	518.5	478.6	1.32527	1.31864	0.981259
Zfp644	142.5	68.8	90.3	115.9	145	138.6	1.3246	1.63985	1.68459
Cdkn2c	1324.3	1166.6	1049.4	1493.3	1358.5	1837.6	1.32458	1.28691	1.28004
Gnao1	1882	1905.4	1516.7	2070.5	2117.5	2837	1.32445	1.22381	1.08665
Mttp	1946.4	1957.4	1198	2048.9	2159.5	2548.2	1.32436	1.33371	1.04675
Smpdl3b	1638.4	1625.1	1009.6	1745.6	2022.3	1890.5	1.32419	1.43011	1.07415
Cenpv	791	859.1	669.2	876.7	981.6	1212.6	1.32406	1.21593	1.02049
Cebpb	255.2	637.7	281	667.7	560.3	326.3	1.32405	1.33667	1.04704
Mtx3	48.4	51.3	33.4	55.8	57	63.4	1.32382	1.33176	1.08772
Foxo3	120.6	139.9	92.9	160	151.8	155.9	1.32343	1.33935	1.14367
Pnpla8	361.1	364.9	250.8	401.7	422.6	467.8	1.32279	1.3388	1.10085
Sorl1	89.7	80.5	56	98.8	93.8	106.6	1.32272	1.41099	1.22733
Tgm2	8527.4	8859.2	4678.7	9351	10399.5	9435.6	1.32271	1.4589	1.05551
Prss23	1905.7	1405	763.9	1505.1	1555	2328.7	1.32253	1.4109	1.07125
Ttc38	1885.1	1873.8	1385	2094.3	2037.4	2668.7	1.32203	1.26786	1.11768
Eml3	908	948.3	743.5	1064.9	1030.9	1341.1	1.32199	1.2388	1.12296
Poll	33.2	43.9	28	43	42.5	53.4	1.3216	1.18915	0.979499
Gfod2	614.4	596	473.3	627.1	749.7	848	1.32138	1.28757	1.05218
Hibadh	2765.6	2781.6	1699.2	3049.5	3084.6	3439.8	1.32119	1.36897	1.09631
Arhgap42	649.1	641	494.6	670.6	756.4	929.8	1.32056	1.2566	1.04618
Epb41l4b	1431.5	1214.9	732.3	1230.7	1525.1	1705.5	1.32042	1.41526	1.01301
Sil1	3482.9	3296.4	2122.6	3678.4	3522.9	4540.8	1.31906	1.3289	1.11588
Tbc1d17	557.1	598.9	732.5	667.1	573	1250.2	1.31867	0.931426	1.11388
Cpne8	2010.9	2082	1678.8	2223.2	2375.8	3011.2	1.31854	1.22288	1.06782
Crygs	707.1	613.2	262.7	675.5	832.6	579	1.31845	1.72177	1.1016
Echs1	5937.1	6179.7	4070.5	6519.8	6465.8	8355.4	1.31838	1.26686	1.05504
Bdh1	196.4	174.9	91.9	200.6	218.8	190.9	1.31757	1.57196	1.14694
Cln5	1265.4	1314.7	1086.9	1470.3	1385.2	1973.4	1.31685	1.189	1.11835
Tgfbr3	2533.6	3354.3	1346.9	3135	3895.2	2496	1.31672	1.49541	0.934621
Eno2	517.6	470.1	361.4	583.9	516.8	675.5	1.31658	1.32375	1.24208
Sntb2	6588.9	6201.8	3888.4	6868.8	6495.8	8592.7	1.31646	1.32451	1.10755
Nagk	2490.3	2349.6	2106.4	2798.7	2542.6	3802.8	1.3164	1.19868	1.19114
Oxr1	397	409	343.3	453.6	455	604.3	1.31637	1.20776	1.10905
Ptprg	1714.4	1661.2	1294.5	1824.6	2009.2	2310.8	1.31573	1.29709	1.09836
Slc9a1	1319.5	1247.8	942.7	1391.5	1399.6	1826.2	1.31547	1.27418	1.11516
Larp6	169.1	190.5	128.9	202.9	196	243.6	1.31525	1.2489	1.06509
Rilpl2	572	477.5	356.1	576.8	619	652.7	1.3151	1.4345	1.20796
Suclg2	7522.4	7257.1	4836.6	7825.7	7564.2	10402	1.31483	1.27256	1.07835
Amz2	18.6	29.6	26.8	31.3	30.6	36.7	1.31467	1.09752	1.05743
Lifr	140.2	170.2	97.7	185.9	193.9	156.7	1.31463	1.41769	1.09224
Tnfaip2	404.6	635.8	301.4	662.4	698.7	402.8	1.31458	1.4523	1.04184
Dbi	1711.6	1417.7	1131.8	1580	1929.9	2091.5	1.31454	1.3767	1.11448
Tmem201	170.8	161.9	134.1	169.3	205.4	238.9	1.31448	1.26588	1.04571
Galns	636.7	675	482.5	742.1	717.2	898.8	1.31429	1.26073	1.09941
Rgl1	989.4	1022.8	799.8	1037.3	1083.5	1574.1	1.31398	1.16361	1.01418
Aldh1a7	26085.9	23727.5	13554.4	25727.9	27030.5	30503.9	1.31395	1.41512	1.08431
Fam120c	2528.3	2563.6	1719.5	2618.3	2831	3498.2	1.31361	1.27228	1.02134
Gpr64	694.7	736.3	408.6	743.5	1093.3	579.4	1.31344	1.60433	1.00978
Itga1	13211.7	11883.3	6193.8	12182.5	13866.7	15039.6	1.31321	1.44101	1.02518
Arhgap24	1008.5	1208.3	840.5	1250	1230.1	1534.7	1.31318	1.21051	1.03451
Tln2	20382.1	20723.1	11588.6	20610.3	24936.6	23649	1.31317	1.40961	0.994557
Glrx	2797.5	3111.9	1951.4	3388.6	3737.3	3193	1.3127	1.40736	1.08892
Glt8d2	2418.7	2541	2016.9	2460.8	2663.3	4034.1	1.3127	1.12422	0.968438
Arap1	2623.6	2404.2	1919.9	2627.8	2617.3	3871.3	1.31215	1.21299	1.093
Asah2	2108.6	1929.6	794.4	1998.4	2254.6	2087.8	1.31209	1.56131	1.03566
Idh2	9386.2	9659.3	7224.8	10544.6	8992.9	14924.5	1.31182	1.15715	1.09165
Ablim1	5316.4	6348.2	3662.8	5772.5	7681.7	6644.1	1.31127	1.34394	0.909313
Pdgfra	2965.4	4865.3	2899.6	5676.3	4878.8	3504.7	1.31029	1.35933	1.16669
Fzd1	364.1	323.4	209.2	343.7	338	493.2	1.31025	1.27995	1.06277
Relb	506.3	1029.4	473.1	1043.3	1104.7	481.7	1.30909	1.42962	1.0135
Ctnnb1	10576.3	9542.9	6565.6	10771.7	11077.3	13078.7	1.3089	1.35636	1.12877
Phkg1	184.1	187	144.6	179.5	201.1	293.9	1.30793	1.14777	0.959893
Hp1bp3	8220.8	8323.5	6729.5	9089.6	8555	12794.6	1.30787	1.17217	1.09204
Oat	8575.3	9474.5	7515.8	10067.3	10425.1	12943	1.30783	1.20612	1.06257
Nt5m	492.8	499.8	311.4	490	533.7	681.5	1.30767	1.26196	0.980392
Dnm1	10687.1	10648.7	8133.2	11969.9	10490.2	16072.8	1.30757	1.19584	1.12407
Crat	3835.3	4016.5	2819.8	4055.2	4092.9	5803	1.30731	1.19189	1.00964
C2cd5	301.4	288.1	319.7	423.6	444.2	320.7	1.30719	1.42777	1.47032
Pcyox1	10520.7	10377.6	7433.4	11572.5	11979	13477	1.30696	1.3223	1.11514
Svil	3306.8	3630.8	2839.1	3963	4136.3	4678.1	1.30692	1.25184	1.09149
Pdp1	1776.3	1650.1	1191.9	1799.6	1745.3	2490.3	1.3068	1.24733	1.0906
Slc9a6	89.3	102.3	60.4	99	98.5	131.7	1.30635	1.21389	0.967742
Itpr1	9549.1	9046.8	6168.4	9379.7	9435	13521.9	1.30577	1.23657	1.0368
Il1rn	15164.1	14294.5	6001	15222	18711.8	12346.2	1.30515	1.67199	1.06489
Plxdc2	2009.4	1820.4	1436.3	2110.6	1768.7	2993.2	1.30505	1.19118	1.15942
Ppcdc	1448.3	1397.2	801.7	1598.8	1493.8	1666.7	1.30492	1.40643	1.14429
Mettl7a1	3067.7	3030.3	1759.8	3162.5	3858.1	3227	1.30413	1.46565	1.04363
Fbln1	391.4	322.4	286.5	387.2	404.1	513.1	1.30401	1.29956	1.20099
Xylt2	53.6	63.8	52.1	66.3	79.6	75.1	1.30383	1.25884	1.03918
Tor4a	595.8	595.6	401.5	633.6	670.3	772.7	1.30366	1.30769	1.0638
Serpinf1	923.2	1009.6	728.7	991.6	1050.6	1427.4	1.30363	1.17483	0.982171
Nprl2	162.5	153.6	110.1	177.5	152.1	226	1.30361	1.24991	1.1556
Gab1	1022.8	947.7	927.2	1086.5	1040.3	1650.4	1.30352	1.13435	1.14646
Bckdha	2012.5	2067.7	1525.1	2180.2	2231.9	2890.6	1.30282	1.22804	1.05441
Aldh9a1	5267.3	5193.1	3774.6	5798.4	4850.7	7895	1.30271	1.1875	1.11656
Penk	7791.4	5461.9	2184.6	6849.9	4370.3	8890.5	1.30268	1.46736	1.25412
Nradd	43.5	50	19.3	44.4	55.6	46.9	1.3023	1.443	0.888
Nudt13	107.4	98.1	58.4	117.9	112.3	113.3	1.30163	1.47093	1.20183
Nmrk1	297.8	279.5	171.4	292.1	298.6	383.7	1.30146	1.31005	1.04508
Tmem134	121.8	120.7	112.2	136	143.6	182	1.30138	1.20052	1.12676
Nnmt	297.3	348	247.3	402.6	394.5	364.3	1.30114	1.33899	1.1569
E4f1	278.6	306.5	247.2	350.8	349.8	382.3	1.30109	1.26531	1.14454
Ivd	5117.7	4964.5	3097.3	5274.3	5356.7	6490.7	1.29912	1.31869	1.0624
Ttc8	83.6	62.3	72.1	81.9	97.8	103.5	1.29908	1.33705	1.31461
Dcxr	5327	5254.2	2782.1	5972.1	6080.5	5305.3	1.29892	1.49977	1.13663
Scpep1	6333	6003.1	4598.7	6953.9	6064.2	8973.8	1.29862	1.22791	1.15838
Nfia	391	361.2	308.9	380.7	320.6	676.4	1.29837	1.04656	1.05399
Sgsh	240.8	229.7	148.2	229.6	233.9	339.6	1.29804	1.22651	0.999565
Plekhm3	128	151.4	111.8	160.5	187.9	159.3	1.2978	1.32371	1.06011
Ift52	46.1	46	49.8	56.3	66.9	60.9	1.29739	1.28601	1.22391
Ndufv3	2288.5	2294.3	1690.6	2510.7	2652.2	2972.6	1.29682	1.29562	1.09432
Pawr	1947	1874.6	1146.9	1940.9	1958.5	2541.9	1.29643	1.29055	1.03537
Akr1c12	461.6	439.2	152.9	400.2	446.9	518.3	1.29581	1.43067	0.911202
Mpeg1	220	177.3	38.1	163.1	381	20	1.29559	2.526	0.91991
Hspa12a	1282.7	1229.8	1126.9	1465.3	1502.6	1747	1.29552	1.25935	1.19149
Pgpep1	1535.9	1477.8	1021.1	1698.4	1971.9	1556.1	1.29533	1.46877	1.14928
Pycr1	2524.4	2482.7	2058.2	2633.5	2473.5	4042.1	1.29493	1.12467	1.06074
Rmnd1	170.1	146.3	129.9	172.1	179.6	225.8	1.29397	1.27335	1.17635
Acp2	4542.3	4374.3	2779.3	4982.3	4637.6	5509.5	1.29356	1.34476	1.13899
Jag1	249.1	226.7	177.5	238.7	336	270.3	1.29343	1.42182	1.05293
Phactr1	513.8	493.3	315.3	531.3	521.4	657.6	1.29333	1.30188	1.07703
Tanc2	459.3	463	366.3	515	503.5	647.8	1.29311	1.22814	1.11231
Pdp2	85.1	75.5	66	96.4	100.4	96.2	1.29303	1.39081	1.27682
Shpk	269.7	241.9	143.1	278.9	307	260.6	1.29296	1.52182	1.15296
Pip5k1c	694.6	723	597.3	711.5	790	1102.9	1.29257	1.13724	0.984094
Rcn3	5333.5	5662.6	4401	6374.1	5760.9	7766.5	1.29255	1.20583	1.12565
Immt	74.3	66	54.8	86.5	75.9	89.7	1.29216	1.34437	1.31061
Tifa	460.2	497.9	294.1	541.1	614.7	462.2	1.29213	1.45934	1.08676
	379.9	448.3	483.2	617.1	678.8	397.6	1.29137	1.3912	1.37653
Vamp2	162	163.8	145.7	188.2	182.3	238.2	1.29099	1.19709	1.14896
Ncam1	5681	6234.2	5998.6	6670.6	5557.9	10897.9	1.29098	0.999648	1.07
Cnn3	11410	11192.8	8075.6	13698	12487	13419.8	1.29097	1.35896	1.22382
Hint2	960.7	880.6	596.2	1091.6	965.3	1087.5	1.29001	1.39281	1.23961
Pld3	2128.9	1944.8	1384	2395.3	2234.6	2408	1.28954	1.39086	1.23164
Bbs2	191.1	190.2	173.8	218.6	210.9	286.1	1.28914	1.17995	1.14932
Clec2d	285.1	294.2	159.2	359.9	371.4	220.4	1.28869	1.61292	1.22332
Atpif1	1197.4	1121.5	1092.3	1367.3	1320.2	1708.3	1.28864	1.21398	1.21917
Ppp1r9b	5260.4	5281.7	3927.5	5939.3	5541.8	7164	1.28857	1.2467	1.12451
Mocs1	526.8	605.3	380.9	632.8	737.2	579	1.28817	1.38917	1.04543
Stk17b	226.5	226.5	200.7	260.1	226.2	355.4	1.28759	1.13834	1.14834
Acadsb	3623.1	3861.2	2788.3	3971.3	4016.2	5234.4	1.2871	1.20122	1.02851
Atp5s	552.9	539.3	463.9	602.2	627.4	771.6	1.28604	1.22568	1.11663
Pdlim2	4542.8	4237.3	2675.1	4376.5	4577.9	5775.6	1.28588	1.29541	1.03285
Ech1	1329.1	1309.7	1004.2	1451.5	1341.7	1890.4	1.28564	1.20714	1.10827
Stom	1832.6	1777.5	1203.7	1875	2157.9	2154.6	1.28537	1.35278	1.05485
Rrad	95.1	150.5	101.2	165.8	146.4	133.4	1.28489	1.24037	1.10166
Fn3krp	1154.1	1123.2	899.6	1226.3	1286.1	1569	1.28471	1.24204	1.09179
Jcad	219.3	238.5	234.3	292.9	313.1	283.1	1.28464	1.28173	1.22809
Map2k5	548	522.4	398.1	547.1	599	740.3	1.28458	1.24508	1.04728
Tfcp2	1200.4	1193.4	957	1313.5	1262.8	1727.4	1.28438	1.19806	1.10064
Apoa1bp	4091.2	4171.1	3517.2	4866.3	4781	5481.2	1.28431	1.2548	1.16667
Gda	1239.6	1311.8	863.3	1291.5	1943.7	1149.5	1.28407	1.48738	0.984525
Txndc16	1348.9	1310.6	885.7	1503.6	1338.6	1707.6	1.28337	1.29409	1.14726
Mccc1	2723.1	2547.3	2127.2	2753.6	2910.4	3827.4	1.28304	1.21168	1.08099
Aga	1407.5	1284.8	920.6	1425.8	1507.7	1701.6	1.28293	1.33014	1.10974
Zfyve21	610.1	641.8	565.7	654.3	670.3	1006.8	1.28268	1.09698	1.01948
Akr7a2	2426.9	2614.4	1949.2	2863.4	2744.5	3358.2	1.28261	1.22883	1.09524
2015-09-06	1571.6	1539.2	1207.9	1667.6	1515	2356.6	1.28261	1.15853	1.08342
Islr	1966.2	1660.6	1188.8	1953.7	1943	2278.8	1.28239	1.36755	1.1765
Dennd6a	159.1	162.9	119.4	159.6	167.2	239.1	1.28206	1.15763	0.979742
Tmco3	258.4	237.8	156.5	228.5	294.8	313.4	1.28191	1.32716	0.960892
Slc12a2	6601.1	7376	4548	7458.2	8816.7	7468.8	1.2817	1.36489	1.01114
Alcam	5181.4	4809.5	3389	5033.5	4921.8	7193	1.28165	1.21428	1.04657
H2-Eb1	91	94.5	59.5	111.6	109.9	92.4	1.28122	1.43831	1.18095
Slc38a10	2579.3	2700	1935.4	2797.5	2617.1	3828.4	1.28113	1.1681	1.03611
Camk4	1789.3	1510.2	973.1	1702.7	1507.4	2263.2	1.28102	1.29268	1.12747
Acot2	799.8	756.2	505.4	842	792.7	1005.5	1.28078	1.29574	1.11346
Fut8	905.1	882	786.4	988.9	906.8	1400.2	1.28071	1.13624	1.1212
Mfsd3	275.5	265.2	159.7	291.9	318.3	286.6	1.28041	1.4361	1.10068
Ppp1r3d	141.9	144.5	89.6	141.5	142.7	197.2	1.28032	1.21401	0.979239
Epn1	1477.3	1447	967.6	1533.3	1588.5	1860.6	1.2802	1.29288	1.05964
Galnt11	517.1	526.3	372.7	534.9	578.3	699	1.27971	1.23826	1.01634
Decr1	6712.7	6697.9	5174.9	7691.1	7033.7	9053.6	1.27941	1.24021	1.14829
Clmp	715.2	798.5	646.2	814	812.2	1137	1.27932	1.12563	1.01941
Ctsb	3707.9	4224.6	3348.9	4640.5	4095.4	5689.3	1.27867	1.15348	1.09845
Slc16a4	490.8	453.5	307.4	506.8	412	681.3	1.27834	1.20752	1.11753
Riiad1	265	279.4	225.7	358.1	330	296.1	1.27802	1.3623	1.28168
Cpt2	4606.4	4898.7	3530.6	5256.1	5006.1	6396.5	1.27793	1.21744	1.07296
Ltbp3	1962.2	2468.1	1896.6	2325.5	1945.9	3812.9	1.27777	0.978624	0.942223
Csgalnact1	551.4	500.4	331.6	549.4	574.4	643.6	1.27758	1.35072	1.09792
Alg10b	150.7	138.4	102.3	151.7	168.5	179.8	1.27747	1.33029	1.0961
Capn5	668.9	679.4	524.3	702.1	801.9	888.1	1.27742	1.24948	1.03341
Slc39a3	225	216.3	155.3	212	205	345.1	1.27741	1.12217	0.98012
Atp8b2	459.1	475.5	375.2	488.5	515.2	669.4	1.27737	1.17985	1.02734
Casp9	178	156.8	152.6	202.8	198.3	221.3	1.27698	1.29638	1.29337
Pacs1	952.2	987.4	901.1	1062.7	1113.9	1447.1	1.27564	1.15255	1.07626
Plscr1	486.8	584.3	398.4	546.9	690	636.8	1.27506	1.25868	0.935992
Hmgn3	222.6	224	193.3	236.9	231.1	347.8	1.27489	1.1215	1.05759
Dbt	3041	3092.2	2140.2	3250.5	3445.2	3851.3	1.27481	1.27966	1.05119
Prdx3	4055.2	3934.3	3202	4663.1	4560.5	5038.2	1.27434	1.29249	1.18524
Ppm1h	78.4	83.2	77.8	99.5	112.3	93.2	1.27402	1.31553	1.19591
Gcdh	1811.8	1862.3	1457.9	1970.8	2062	2504.2	1.27377	1.21463	1.05826
Fut11	551.8	580.5	587.8	639.8	565.4	985.8	1.27376	1.03158	1.10215
Rab9a	3778.5	3699.1	2398.4	4024	3878.5	4673.3	1.27337	1.29602	1.08783
Hebp1	1744.2	1804.8	1557.8	2032	1778.7	2691.6	1.27326	1.13326	1.12589
Pxmp4	301.6	244.4	169.5	257.4	248.5	404.8	1.27282	1.22228	1.05319
Slc2a8	120.9	120.1	107.9	141.5	153.6	148.9	1.27257	1.2943	1.17818
B3gat3	138.3	157.7	128.2	179.8	168.9	191.1	1.27251	1.21966	1.14014
Timm10	333.7	224.2	175.3	275.6	418.8	238.5	1.27237	1.73817	1.22926
Kiaa0100	116.4	130.6	98.5	142.8	151	145.8	1.27236	1.28241	1.09342
Dtx3	354.4	362.3	254.1	356.9	336.4	541.7	1.27215	1.12476	0.985095
	3737.8	4029.2	3107.8	4571.8	4055.7	5201.7	1.27167	1.20884	1.13467
Echdc3	1200	1153	828.2	1210.9	1281.4	1552.6	1.2715	1.25797	1.05022
Slc25a45	58.4	49.3	28.7	47.5	57.3	68.6	1.27126	1.34359	0.963489
Mon1a	137.8	132.8	99.8	135.1	159.7	176	1.27106	1.26741	1.01732
Sned1	409.8	455.5	275.8	490	482.2	478.1	1.27097	1.32941	1.07574
Lysmd1	120.4	116	103.3	136.3	138.1	157.3	1.27083	1.25125	1.175
Mast4	597.4	738.1	752.6	847.7	1022.3	781.2	1.26967	1.25444	1.14849
Ugt1a6	1649.8	1586.9	888	1568.5	2329.5	1338	1.26943	1.57501	0.988405
Mtatp8	1298.6	802.4	681.4	993.9	1210.4	1327.1	1.26919	1.48558	1.23866
Cnn1	1839.1	1712	1163.2	1992.1	1849.2	2140.7	1.26891	1.33601	1.16361
Pdlim4	1965.9	2012.8	1421.3	2205.4	2265.3	2381.3	1.26889	1.30185	1.09569
Plscr2	1001.4	811	266	619.5	1559.1	458.6	1.26886	2.02284	0.763872
Dnase1l1	108.2	119.5	103.7	128.6	136	155.9	1.26886	1.18548	1.07615
Hsbp1	48.4	24.1	32.1	43.7	57.1	31.9	1.26864	1.79359	1.81328
Ctsd	13676.7	13573.9	8820.3	15088.6	13432.5	17236.4	1.26854	1.27359	1.11159
Ldhd	507.9	564.6	394	572.2	520.8	765.5	1.2673	1.1402	1.01346
B3galtl	3421.1	3557.4	2742.7	3674.8	3937.6	4705.2	1.26709	1.2083	1.033
Ahnak2	1088.9	1003	666.4	1111.3	1191	1192.1	1.26687	1.37912	1.10798
Mtss1	51	53.8	34.3	51.5	69.1	55.6	1.26671	1.3689	0.957249
Srgap3	3005.9	2911.5	2219	3230	2910.1	4164.9	1.26653	1.19678	1.10939
Steap3	6864.7	6578.1	4969	7624.8	5497.6	10189.4	1.26613	1.13642	1.15912
Acot11	477.3	465	316.5	521.1	535	537.3	1.26581	1.35138	1.12065
Rftn2	549.1	569.4	588.5	593.9	528.1	1038.7	1.26579	0.968996	1.04303
Ksr1	242.2	369.5	232.4	303.2	432.7	331.3	1.26431	1.22263	0.820568
Tpst1	2395.6	2522.1	1977.6	2639.5	2361	3715.4	1.26403	1.1113	1.04655
Phkg2	136.2	155.5	117.9	143.9	157.8	216	1.26392	1.10351	0.925402
Ccbl2	875	899	678.4	963.2	1025.3	1109.5	1.26325	1.26062	1.07141
Cd34	536.5	421.4	299.1	512.2	488.1	587.4	1.26309	1.38834	1.21547
Ptpra	3349.8	3413.8	2612.5	3585.5	3801.7	4455.3	1.26305	1.22583	1.0503
Arsg	412.2	404.4	344.8	428.5	455.2	582.9	1.26279	1.17952	1.05959
Tpp1	2899.3	2842.2	2156.9	3125.6	2977.2	3870.3	1.26267	1.22078	1.09971
Nnt	13976.7	14213	11017	15310.1	14983.4	19199.9	1.26237	1.20069	1.07719
Nudt8	457.4	444.7	285.7	455.5	466.4	577.5	1.26233	1.26219	1.02429
Fahd1	1066.2	1113.4	835.5	1209.5	1100.6	1495.9	1.26231	1.18534	1.08631
Ski	356.7	381.5	285.2	391.5	378.6	521.4	1.26197	1.15509	1.02621
Mme	15904.1	15341.1	10650.5	17945.1	15443.9	19471.3	1.26171	1.28461	1.16974
Coq9	881.8	839.1	658.2	986.1	867.2	1148	1.26153	1.23776	1.17519
Eva1b	127.9	131.5	116.3	141.8	154.5	177.6	1.26138	1.19572	1.07833
Cd276	227.8	261.1	228.2	319.3	257.7	327.5	1.26133	1.17924	1.2229
Fam171a1	207.8	216.5	188.9	238	261.6	273.7	1.26109	1.23236	1.09931
Ak3	6015.2	6115.3	4394.3	6213.3	6546.5	8077.8	1.26099	1.21411	1.01603
Hsd17b10	4084	4076.9	3128	4494.4	4356.1	5384.5	1.26097	1.2284	1.10241
Stk16	1238.7	1261.8	992.3	1267	1461.6	1675.4	1.26088	1.21051	1.00412
Cbr1	8109.1	8256.3	6187.8	9240.8	9085.8	10106.8	1.26073	1.26879	1.11924
L3mbtl3	34.7	40.7	49.3	46.4	47.6	63.2	1.26063	1.04444	1.14005
Sorbs3	2702.4	2598.6	2253.3	2985	3273.8	3262.7	1.26041	1.28997	1.1487
Slc25a11	5485.3	5532.2	3886.4	5819.5	5851.8	7108	1.26003	1.23918	1.05193
Fzd8	124.6	114.9	108.9	122.5	127.7	188.7	1.25976	1.11796	1.06614
Aco2	19748.5	20773.9	15755.2	21816.5	20944.7	28117.1	1.25944	1.17061	1.05019
Hscb	512.1	491.4	344.2	585.2	546.3	565.5	1.25918	1.35412	1.19088
Scai	908.9	907.1	749	940.3	958	1330.9	1.25895	1.14625	1.0366
Pign	254.9	274.2	236.5	306.7	347.8	309.2	1.25875	1.28157	1.11853
Oxct1	11442.1	11935.2	8986.1	12824.5	11654.4	16253.3	1.25859	1.17005	1.07451
Metap1d	288.2	290.5	251.6	336.8	315.4	392.8	1.25858	1.2031	1.15938
Ppt1	832.8	818.2	549.7	860.5	829.4	1079.5	1.25842	1.2354	1.0517
Mettl10	1055.1	1039.5	1032.6	1222.6	1169.3	1542.7	1.25819	1.15434	1.17614
Rhou	450.6	398.8	267.7	427	402	576.3	1.25799	1.24381	1.07071
Col3a1	3448.6	4248	3786.2	4112.2	2913.6	7418	1.25786	0.874487	0.968032
Mrc2	3892.3	4178.8	3923.4	4528.9	3183.1	7375.2	1.25784	0.95184	1.08378
Ndufb2	137.1	95.3	85.3	139.6	154.3	105.7	1.25779	1.62735	1.46485
Serpinb1a	25422.7	23226.6	13532.3	25217.7	26349.4	26634.9	1.25764	1.40285	1.08572
Scrn2	1762.4	1738.8	1460.4	1940.8	1999.1	2297.4	1.25711	1.23153	1.11617
Cyb5a	1227.7	1204	836.1	1282.9	1546.7	1278	1.25699	1.38699	1.06553
Ahnak2	13258.7	13293.2	10035.1	14402.8	15729.8	15854.2	1.25692	1.29168	1.08347
Prr14	45.7	56.5	59.4	60.5	72.7	69.9	1.25681	1.14927	1.0708
Gnpda1	4208.3	4051.9	3149.2	4824.1	4172.6	5341.1	1.25667	1.24935	1.19058
Mark1	60.9	86.3	55.4	80.7	111.5	62.4	1.25666	1.35639	0.93511
Fkbp7	5306.9	5309.9	4459	5947.1	5306.8	7690.1	1.25658	1.15201	1.12
Myof	32921.6	38078.9	36791.4	37714.1	39888.8	57809.9	1.25624	1.0365	0.99042
Rhbdf1	810.5	820.8	656.1	862.1	920.7	1090.7	1.25623	1.20712	1.05032
Nenf	1794	1830.8	1338.1	1935.2	1744.5	2552.1	1.25568	1.16119	1.05702
Plscr3	508.1	521.4	416.3	541.2	602.2	671.9	1.25557	1.21937	1.03797
Nek4	272.2	292.2	254.7	318.2	350.3	359.2	1.25467	1.22234	1.08898
Emb	3740.4	4817.3	2742	5107.3	5095.8	3972.9	1.25455	1.34974	1.0602
Pon3	3647.3	3764.6	3044.2	4462.8	4389.5	4264.5	1.25446	1.30013	1.18546
Acot1	3547.7	3280.2	2183.1	3538.1	3467.9	4297.9	1.25446	1.28238	1.07862
Abhd14b	4015.8	3806.2	2943.4	4630.9	3812.6	5060	1.25434	1.25096	1.21667
Vrk3	736.5	797.7	576.9	829.2	743.4	1075.2	1.25423	1.14404	1.03949
Mtatp6	1264	1224.8	833.9	1124.4	1378	1664.9	1.25419	1.21552	0.918027
Efr3a	2171.6	2141	1654.3	2238.7	2281.1	2963.6	1.25415	1.19089	1.04563
Prkg1	701.6	715.6	523.6	714.9	897.1	821.5	1.25386	1.30084	0.999022
Thtpa	201	168.2	111	182.3	206.6	213.2	1.25385	1.39291	1.08383
Tfam	2331.4	2377.7	1675.1	2485.5	2436.4	3082.7	1.25381	1.21444	1.04534
Tbc1d24	948.9	901.7	686.9	962.6	967.7	1250.9	1.25367	1.2151	1.06754
Pltp	1040.2	981	794.3	1184.3	1153.9	1190.3	1.25324	1.31707	1.20724
Acads	5572.3	5670	4127	5881.2	5877.8	7500.2	1.2531	1.20027	1.03725
Nucb1	2771.8	3359.9	3254.3	3474.9	3208	5078.5	1.25308	1.01039	1.03423
Glt8d1	1002.6	1074.8	912.5	1063.6	1093.4	1589.3	1.25299	1.08539	0.989579
Armc9	34.3	43.5	32.1	47.4	52.9	37.4	1.25296	1.32672	1.08966
Timm21	715	741.5	509	676.1	727.2	1058.5	1.25251	1.12219	0.9118
Txnip	219.5	268	199.7	249.4	273.8	337.4	1.25233	1.11867	0.930597
Fam126a	954.5	923.7	757.8	1026.9	1070.1	1204	1.25228	1.2471	1.11172
Mmp19	128.5	135.1	78.7	142.3	144.5	141.8	1.25212	1.34144	1.05329
Fig4	106.8	121	95.4	124.4	137.8	142.4	1.25186	1.21165	1.0281
Entpd5	955.5	1019.6	753.9	1027	1068.5	1320.5	1.25174	1.18156	1.00726
Stx16	174.2	195.3	173.4	201.1	207.9	270.5	1.25161	1.1093	1.0297
Echdc2	960.2	1031.4	769.1	1094	1039.5	1320.1	1.25099	1.18495	1.06069
Akap12	11681.4	10922	10753	10917	11848.4	18950.6	1.25061	1.05031	0.999542
Sft2d2	142.3	144.7	104.6	156.3	144.7	188.7	1.25051	1.20738	1.08017
Acat1	10270.6	10634.4	8094.1	11398.9	10032.7	14820.8	1.25012	1.14433	1.07189
Ap3m2	1734.5	1731.2	1082.7	1860.9	1903	1921	1.24987	1.33761	1.07492
Tcp11l1	388.9	395.3	323.4	410.1	494.3	479.8	1.24973	1.25838	1.03744
Slc25a51	1560.6	1559.4	1196.8	1655.2	1668.5	2070.9	1.24968	1.2059	1.06143
Sdsl	546.2	548.6	321.2	618.1	619.8	531.1	1.24929	1.4232	1.12669
Sh3d19	3222.3	3515.9	2599.8	3634.4	3829.8	4198.3	1.24893	1.2205	1.0337
Phc3	1032.2	965.8	751.6	1065.6	970.7	1397.7	1.24891	1.18569	1.10333
Impact	4259.6	4366.9	2146.8	4696.9	4982.4	3775.4	1.24889	1.48599	1.07557
Acp1	296.7	308.4	232.9	340.1	353.3	353	1.24869	1.28099	1.10279
H2-Q4	142.4	229.4	64.5	261.5	278.4	4.9	1.24868	1.83702	1.13993
Wdr19	3693.8	3834.7	2954.9	3946.7	4103.7	5039.4	1.24862	1.1857	1.02921
Leprel2	4893.9	5368.7	4120.7	5445.4	5192.6	7320.4	1.24856	1.12104	1.01429
Pomgnt2	41.5	48.8	38.2	52.4	60	48	1.24825	1.29195	1.07377
Ppic	2140.6	2302.3	1622.8	2438.8	2254.3	2876.6	1.24795	1.19566	1.05929
Hdhd2	2075.9	1991.9	1409.9	2276.1	2269.9	2288.7	1.24773	1.33635	1.14268
Cyb5r3	11033.4	11523.6	7348.9	11909.3	12695.4	12709	1.2477	1.30373	1.03347
Smim19	333.2	367.1	279.4	385.7	390.7	445.8	1.24752	1.20093	1.05067
Rap2b	2018.6	1924.3	1443.9	2115.4	2357.7	2246.1	1.24735	1.32804	1.09931
Hs1bp3	3408.7	3155.3	2380.2	3639.3	3353.5	4163.4	1.24731	1.26326	1.15339
Cachd1	161.3	155.1	130.9	163.5	177	217.4	1.24726	1.19056	1.05416
Ngly1	1989.5	2007.2	1657.3	2109.8	2107.7	2832.3	1.24687	1.15091	1.05112
Ift122	3217.8	3286.8	2383.3	3492.4	3385.9	4203.6	1.24685	1.21308	1.06255
Tmem164	197.3	196.5	220	205.6	167.2	392.5	1.24682	0.895078	1.04631
Maoa	14078.6	13146.2	9177.8	14651.2	14883.1	15846	1.24662	1.32298	1.11448
Rras	2248.5	2347.8	1868.3	2514.5	3138.8	2402.3	1.24611	1.34088	1.071
Galk2	3045.7	2911.3	2245	3466.7	2865	3887.8	1.24598	1.22795	1.19077
Tmx4	568	610.9	513	650.1	639.6	817.5	1.24546	1.14752	1.06417
Habp4	345.6	382.9	346.9	399.1	477.3	462.9	1.2454	1.20088	1.04231
Rnf170	21.8	24.4	32.1	28.7	31.4	37.4	1.24521	1.06372	1.17623
Sun2	4612.9	5177.5	4606.9	5601.2	4868.3	7456	1.24506	1.07002	1.08183
Zfp658	302.4	316.1	251.4	372.8	355.9	354.1	1.24474	1.28405	1.17937
Nlrx1	1265	1283.1	998	1379.8	1377.5	1656.3	1.24463	1.20876	1.07536
Dock4	1828.1	1691.6	1196.8	1801.1	1847.1	2220.4	1.24427	1.26305	1.06473
Dram2	71	77.7	75.7	92.5	86.2	100.5	1.24421	1.16493	1.19048
Rps6kc1	509.5	517	414.4	577.5	544.4	670.5	1.24394	1.20453	1.11702
Lactb	2982.8	3062.3	2029.5	3101.7	3213.7	3725.8	1.24355	1.24031	1.01287
Ptpdc1	1086	1026.6	722.6	1055.5	1153	1316.1	1.24316	1.26258	1.02815
Kdelr1	53	56.8	35.6	55.5	56.7	68.5	1.24278	1.21429	0.977113
Ppa2	2388.5	2325.3	1851.6	2550.5	2558.5	3050.2	1.24276	1.22316	1.09685
S100a10	2620.5	1967.9	1505.8	2368.6	2416.5	2788.5	1.24276	1.37752	1.20362
Efr3b	122.8	154.4	108	158.9	138.4	181.4	1.24273	1.133	1.02915
Cradd	313.2	298.3	346.9	381.8	367.5	441.7	1.2427	1.16135	1.27992
Zbtb20	552.5	577.8	423.5	604	550.1	776.8	1.2427	1.1526	1.04534
Hsd17b11	3024.1	3029.5	2146.7	3184.1	3324.4	3680.9	1.24256	1.25739	1.05103
Dak	3886.2	3873.1	3205.4	4203.6	4239.2	5181.4	1.24255	1.19274	1.08533
Fhl1	2272.1	2778.4	2019.6	2414	2625.6	3744.8	1.24247	1.05035	0.868845
Coro7	1790.1	1829.1	1396.9	1952.9	2015.4	2263.9	1.24244	1.2301	1.06768
Pnpla7	233.6	259.7	252	265.4	277.1	383.4	1.24232	1.06019	1.02195
Dyrk1b	54.1	68.7	41.2	67.1	70.1	66.5	1.24207	1.24841	0.97671
2015-09-05	5080.9	5529.7	4239.1	5809	5543.2	7084.4	1.24155	1.16209	1.05051
Mcur1	914.7	931	701.4	980.6	1027	1152.6	1.24071	1.22985	1.05328
Notch1	251.2	218.7	125.7	242.9	236.4	259.6	1.2406	1.3917	1.11065
St3gal1	387.2	499.7	381.2	481.6	600.3	490.8	1.2402	1.22818	0.963778
Mef2bnb	87.7	55	61	87	91.6	74	1.24006	1.53966	1.58182
Mprip	4083.4	4169.9	2803.8	4214.3	4901.7	4591.8	1.23973	1.3072	1.01065
Nadk2	1375.7	1398	1099	1476.2	1636.5	1688.1	1.23965	1.24658	1.05594
Arl3	4149.2	3896.2	3295.9	4301.5	3871.2	5877.6	1.23886	1.13634	1.10402
Eif4e3	36.7	37.4	18.9	34	37	44.2	1.23871	1.2611	0.909091
Xdh	1773.1	2309.8	1037.7	2123.6	3123.5	1093.2	1.23819	1.56747	0.919387
Atp5l	2684.7	2806.7	2159.5	3146.2	3026.8	3299.7	1.23812	1.243	1.12096
Plcd1	8586.5	8854.7	6819.2	9225.4	9064.6	11746.5	1.23809	1.16691	1.04186
Sfxn1	2186.6	2329.5	2111.4	2473.9	2433.2	3298	1.23804	1.10498	1.06199
Asah1	3502.1	3512.9	2656.1	3778.4	3777.5	4417.2	1.23803	1.22482	1.07558
Chsy1	2217.3	2300.2	1592.9	2362.2	2243.4	2958.7	1.23794	1.18302	1.02695
Oxsm	1963.6	2016.7	1495.5	2154.8	2095.8	2528	1.23792	1.21024	1.06848
Hagh	828.3	820.2	632.9	883.6	941.5	998.3	1.23757	1.256	1.0773
Nt5dc2	1385.3	1568.7	1467.1	1616.9	1475.9	2378.3	1.2375	1.01878	1.03073
Tgfbi	199.3	211.8	180.4	262.7	156.3	312.9	1.23736	1.06833	1.24032
Tns3	10794.7	11043.7	8984.3	11688.7	12405.1	14041.4	1.23724	1.20301	1.0584
H6pd	5781.9	6315.9	4266.1	6270.1	6701.5	7274.3	1.23723	1.22582	0.992748
Marcks	9372.4	9481.1	9927	9990.7	9118.9	16490.2	1.23694	0.98462	1.05375
Dclk1	68	81.9	35.8	74.2	87.3	68.2	1.23694	1.37213	0.905983
Myo1d	12478.8	13531.8	9326.5	14117.6	13625.1	15964.7	1.23687	1.21368	1.04329
B3gnt9	356.6	411.5	341.4	421.7	378.6	571.9	1.23677	1.06296	1.02479
Etfdh	5311.1	5682.9	4268.3	6020.7	5855.4	6994.6	1.23643	1.19343	1.05944
Gbas	2153.7	2257.3	1634.8	2410.7	2231	2833.1	1.23636	1.1926	1.06796
Dnajc5	1759.3	1722.3	1294.3	1837.2	1961.6	2102.9	1.23573	1.2593	1.06671
Chid1	1465.2	1499	1040.1	1521.7	1724	1702.1	1.23562	1.27829	1.01514
Hibch	3304.2	3505.5	2715.1	3647.8	3654.5	4465.5	1.23549	1.17389	1.04059
Atl1	1213.7	1271.3	903.8	1344.8	1450.7	1391.1	1.23542	1.28523	1.05781
Mios	2108.8	2296.2	1752.9	2289.7	2509	2808.8	1.2354	1.18513	0.997169
Spin1	602	694.2	694.1	709.1	666.9	1082.4	1.23519	0.99114	1.02146
Pgm1	9174.2	10054.6	6561.7	10396.1	11399.7	10059.3	1.23515	1.31171	1.03396
Nid2	2733.2	2585	2480.7	2772.7	2531.6	4327.2	1.23498	1.0471	1.07261
Sirt6	319.3	331.8	275.7	355.2	395.7	393.3	1.23457	1.23605	1.07052
Etfb	6852.3	6862.5	5311.2	7435.7	6863	9189.9	1.23455	1.17456	1.08353
Fdx1l	28	24.7	27.9	35.9	30.9	32.7	1.23449	1.26996	1.45344
Mmaa	1313	1331	927.7	1368.7	1381.7	1657.4	1.23409	1.21769	1.02832
Ctnna1	18851.8	18126	13526.7	19081.4	18877.7	24366.1	1.23405	1.19924	1.05271
Dnajb9	190.7	202.8	182.9	224.3	230.1	256.7	1.23369	1.17812	1.10602
Znf512	1273.9	1253.9	1161.1	1367.7	1232.3	1950.6	1.23359	1.0766	1.09076
Cav1	8347.6	7795.9	5202.4	8456.3	8930.1	8941.2	1.23338	1.33759	1.08471
Pan2	150.3	170.1	184	209.7	217	195.4	1.23335	1.20503	1.2328
Tmem161a	119.4	131.8	108.8	159.4	146.5	138.1	1.23333	1.2714	1.20941
Zfand1	407.4	432.9	403.2	446.8	460.5	626.3	1.23329	1.08516	1.03211
Evl	221.2	207.9	171.6	216.3	216.4	308	1.23306	1.14018	1.0404
Ppp1r12b	1499.6	1481.6	941.9	1590.7	1683.4	1563.1	1.233	1.35098	1.07364
Dennd1a	614.2	644.9	524.5	681.2	657.6	860	1.23279	1.14486	1.05629
Tctn1	224.7	217.7	159.1	220	227.4	294.1	1.23275	1.18737	1.01056
Mtmr11	99	124.1	95.3	131.5	144.9	116.1	1.23273	1.2598	1.05963
Tns1	3586.7	3504.6	3213	3843.9	3400.3	5453.8	1.2323	1.07839	1.09682
Rai14	12291.6	11687	8945.5	12886.1	12997.6	14688.6	1.2323	1.25451	1.1026
Mgmt	1830.9	1754	1185.3	1964.9	1990.7	1921.5	1.23204	1.34576	1.12024
Atp5j	385.1	273.9	181.5	324.8	404.3	306.2	1.23177	1.60101	1.18583
	324.4	375.1	315.4	403.3	406.4	440.4	1.23175	1.17263	1.07518
Rab4b	1650.5	1636	1371.8	1808.6	1787.9	2141.2	1.23172	1.19572	1.1055
Akt2	2940.6	2977.3	2531.9	3380.4	3178	3848.9	1.23166	1.19045	1.13539
Dbn1	3350.4	3225.4	2475.2	3401.2	3929.3	3817	1.23163	1.28592	1.0545
Glod4	12541.7	12789.7	9500.9	13555.4	13960.7	15383.3	1.2316	1.23443	1.05987
Ogfod3	323.9	399.3	402.8	426.9	465.8	494	1.23153	1.11295	1.06912
Afg3l2	4403.3	4825.2	3585.6	4922.8	5230.9	5625.5	1.23139	1.20722	1.02023
Ggps1	1707.1	1632.2	1215.7	1896.8	1826.1	1885.8	1.23133	1.30724	1.16211
Nudt14	481.4	491.2	450.4	543.3	577.2	631.5	1.2312	1.19	1.10607
Atp5j2	953.5	958.6	782.6	1078.8	1080.8	1158.1	1.23119	1.24029	1.12539
Fam3c	3553.2	4179.5	3370.3	4332.4	4134.2	5202.6	1.23113	1.12143	1.03658
Selm	591.6	566.8	477.5	678.8	631.9	703.2	1.23107	1.2551	1.1976
Mlycd	772	816.3	581	819	868.2	983.3	1.23104	1.20747	1.00331
Pfkm	5508	5627.9	4246	5736.2	5931.6	7255.2	1.23021	1.18168	1.01924
Dtd2	927.9	965	716.2	1064.9	956.6	1188	1.23012	1.20241	1.10352
Kank2	3960.3	4031.6	3607.1	4345.3	4560.8	5360.2	1.22996	1.16592	1.07781
Idua	345	353.2	268.5	362.1	379.8	447.1	1.22996	1.19334	1.0252
Etfa	9604.7	9919.4	7249.6	10719.4	9549.8	12657.7	1.22982	1.18057	1.08065
Tecpr1	1093.2	1216.4	975.4	1217.9	1335.7	1486	1.22971	1.16507	1.00123
Atp5b	19956.3	20283.6	17262.1	23346.9	23205.5	24116.8	1.22899	1.23989	1.15102
Mb21d2	385.5	331	336.2	385.2	584.3	324.2	1.22894	1.45309	1.16375
Bloc1s5	455.2	453.6	405.7	533.9	569.2	512.3	1.22891	1.28372	1.17703
Nubpl	1179.9	1169.1	948.4	1276.5	1310.8	1464	1.22863	1.22187	1.09187
Ston1	5954.3	6576	4993	6525.1	7133.4	7870.2	1.22858	1.18061	0.99226
Atp11c	670.1	697.1	709.8	768.4	739.8	1043.1	1.22836	1.072	1.10228
Cd47	1492.1	1616.3	973.1	1647.8	2027.5	1338.2	1.22835	1.41936	1.01949
Lman2l	1412.1	1430.6	1121	1425.1	1442.8	2000.8	1.22832	1.12396	0.996155
Camk2g	2819.8	2907.8	2122.6	2931.7	2999.5	3711.3	1.22831	1.17907	1.00822
Pag1	266.1	225.3	195.2	266.7	253.4	323.2	1.22823	1.23686	1.18375
Mapk8ip3	150.5	143.5	86.6	139.2	155.4	172.8	1.22806	1.28031	0.970035
Chchd6	658.3	689.1	604.1	787	809.4	800.1	1.22803	1.23446	1.14207
Scara3	1224.1	1139.8	737.3	1294.9	1252.1	1260.6	1.22778	1.35688	1.13608
Bckdhb	628	750.2	507.4	706.8	662.2	945.9	1.22767	1.08858	0.942149
Acadl	6417.6	6827.3	5401.3	7440.7	7289.9	8154.9	1.22735	1.2046	1.08985
Acad8	4417.8	4850.7	3421.8	4863.7	4862.4	5848.5	1.22728	1.17571	1.00268
Amdhd2	935.1	933.4	697.2	1145.3	959.9	1043.5	1.22723	1.29106	1.22702
Col8a1	382.2	392.7	167.1	379.9	430	345.9	1.22696	1.44677	0.967405
Dennd4a	157	159.9	138.3	156.2	183.4	218.9	1.22693	1.13883	0.976861
Cercam	480.6	524.6	414.4	550	480.7	710.9	1.22682	1.09766	1.04842
Palm	2619.2	2568.8	2196.2	2835.5	2872.9	3349.7	1.22669	1.19799	1.10382
Dapk1	1210.2	1301.6	859	1300	1573.3	1261.2	1.22656	1.32986	0.998771
Cutc	1108.9	1115.6	718.6	1207.9	1102.4	1298.5	1.22619	1.25957	1.08274
Hace1	88.1	95.4	77.9	103.6	105.1	111.8	1.22609	1.20427	1.08595
Cdc42bpg	122.4	115	60.3	121.9	131.3	111.8	1.22607	1.44438	1.06
Man1c1	344.9	321.3	309.2	348.4	297.8	549.7	1.22606	1.0249	1.08434
Dph7	473.3	458.6	397	522.2	520.3	586.5	1.22583	1.21844	1.13868
Mapk12	519.6	589.2	559.5	637.2	612.6	795.2	1.2258	1.08801	1.08147
Enpp5	2402.2	2154.2	1628.2	2609.8	2701.4	2269.4	1.22572	1.40419	1.21149
Elmo1	2336.8	2191.3	1594	2317.8	2144.2	3041.3	1.22561	1.17877	1.05773
Camkk2	1537.1	1832.6	1301.6	1760.7	2097.6	1866.4	1.2255	1.23103	0.960766
Nxt2	234.3	250.6	215.7	287.1	270.6	300.8	1.22538	1.19601	1.14565
Utrn	32101.7	32581.1	24802.1	33942.7	34519.6	41188.1	1.22535	1.19307	1.04179
Pkhd1	253.6	272.4	250.6	327	310.6	314	1.22534	1.21912	1.20044
C1qtnf1	377.2	391.2	313.9	416.2	477.4	432.5	1.22526	1.26734	1.06391
Flot1	4970.2	5300.3	4527.5	5190.5	6515.2	6418.2	1.22475	1.19108	0.979284
Nin	114.6	124.5	107.7	145.8	142.8	136.1	1.22463	1.24289	1.17108
Rap1a	9097.2	8965.1	6871.3	9496.9	9179.2	11854.7	1.22448	1.17931	1.05932
Casp12	1997.2	2164.4	1246	2232.9	2453	1935.4	1.22444	1.374	1.03165
Tmem231	98.6	102	71.3	106.4	97.6	128.9	1.22435	1.17715	1.04314
Dlg4	547.2	558	432.5	537.5	655.7	689.2	1.22417	1.20464	0.963262
Fkbp9	12950.4	13918.8	11184.4	15179.1	12877.7	18524.5	1.2241	1.11766	1.09055
Sdf4	2859.4	3089	2819.1	3274.8	2984.6	4472	1.224	1.05946	1.06015
Homer3	1669.2	1622.1	1323.5	1811.7	1724.6	2111.4	1.22382	1.20054	1.11689
Atp5g2	784.6	722.8	498.2	810.7	751.8	891.9	1.22377	1.27969	1.12161
Thbs3	341.9	380.3	223.5	369.8	371	416.5	1.22375	1.2269	0.97239
Nedd4l	4933.2	4599.7	2801.8	4864.1	5798.2	4431.7	1.2237	1.44056	1.05748
Vdac3	12582.2	12894.8	9768.1	14082.7	13790.3	15252.2	1.22358	1.2299	1.09212
Ahnak2	7794.6	7738.8	5325.3	7960.3	8892.7	8664.6	1.22336	1.29002	1.02862
Zdhhc4	312.5	327.5	270	373.7	379.5	360	1.2233	1.26059	1.14107
Tbcel	1663.4	1636.8	1184.1	1721.3	1893.9	1869.6	1.22311	1.28158	1.05163
Cnpy2	1923.7	1984.4	1454.8	2183.1	1957.8	2418.5	1.22311	1.20403	1.10013
Lrig2	53.4	50.7	54.5	70.7	63.6	59.6	1.22257	1.27662	1.39448
Rabac1	941.1	1043	872.2	1083.6	1143.4	1263.8	1.22214	1.1628	1.03893
Glyctk	54.9	51.2	39.8	64.2	50.5	63.6	1.22207	1.26044	1.25391
Pde10a	94.8	95.1	80.6	100.9	122.8	106.8	1.22181	1.27319	1.06099
Camk2a	2299.6	2271.6	1689.2	2410.4	2392.7	2845.6	1.22176	1.21266	1.0611
2015-09-11	14859.8	15034.5	13391.3	16627.2	16223.6	20032.4	1.22173	1.15567	1.10594
Pip4k2b	1527.3	1619.3	1233.4	1638.1	1781.3	1931.4	1.22164	1.19865	1.01161
Abhd16a	1806.3	2035.1	1581.9	2170.1	2327.5	2127.4	1.22158	1.24346	1.06634
Phykpl	1008.8	1000.8	865.8	1092.2	995.7	1424.6	1.22157	1.11856	1.09133
Gstk1	1474.1	1383.7	944.6	1385.2	1440	1819.5	1.22152	1.21342	1.00108
Gorasp1	743.7	731.2	597	898.6	804.1	828.1	1.22149	1.28196	1.22894
Copz2	1674.7	1647.6	1399.5	1877.3	1785.8	2103.3	1.22123	1.20216	1.13941
Snrk	609.8	601.1	427	643.8	549.2	807.1	1.22114	1.16039	1.07104
Cbx6	350.1	350.4	308.3	369.1	321.6	540.9	1.22086	1.04858	1.05337
Abhd12	1612.7	1708.9	1186.1	1828.2	1828.5	1846.2	1.22078	1.26311	1.06981
Gnaq	2751.2	2936.2	2097	3012.1	3309.9	3178.6	1.22047	1.25606	1.02585
Smg6	638.4	633.2	606.4	692.6	787.9	811.3	1.22034	1.19434	1.09381
Slc12a9	616.3	626.2	514.8	668.9	718.4	757.2	1.22034	1.21586	1.06819
Nit2	3906	4085.2	3149.8	4409.8	4241.3	4942	1.2201	1.19573	1.07946
Cask	4650.4	4466.7	2939.4	4590.9	4902.2	5216.2	1.22003	1.28179	1.02781
Stxbp3	2788.8	2854.5	2327.2	2965.7	3183.5	3574.5	1.21996	1.18671	1.03896
Wdr34	70.8	69.3	57.4	69.4	81	90.5	1.21975	1.18706	1.00144
Mmp2	2520.7	2880.3	2022	3080.6	2568.2	3403.8	1.21953	1.15228	1.06954
Stxbp4	1079.1	1116.8	973.8	1209.2	1131.2	1525.1	1.21952	1.11949	1.08274
Coasy	2314.5	2298.6	1706.9	2433.6	2495.9	2777	1.21938	1.23068	1.05873
Dtd1	422.9	397.3	295.9	412.3	455.8	492.7	1.21925	1.25231	1.03775
Abhd4	1269.9	1301.1	829.5	1417.5	1534.9	1193.4	1.21917	1.38571	1.08946
Mprip	11062.8	11154.5	7730.9	11170.8	12445.6	12885.8	1.21884	1.25051	1.00146
Lacc1	418.3	407.3	243.5	440.9	383.8	478.3	1.21878	1.26721	1.08249
Nck2	2511.2	2447.8	2132.3	2651.8	2436.8	3553.2	1.21865	1.11102	1.08334
Pi4ka	5991.4	6253.4	4559.9	6293.2	6408.9	7775.2	1.21855	1.17467	1.00636
Fech	3640.8	3803.2	2864.7	3845.9	3969.6	4744.6	1.2184	1.17211	1.01123
Vars2	1262.6	1370.3	1215.5	1426.8	1458	1803.2	1.21817	1.11563	1.04123
Lmo7	9243.4	8824.4	5772.8	9595.1	8161	11282	1.21801	1.2164	1.08734
Tmem223	160.4	146.1	118	176.3	164.3	176.4	1.2179	1.28966	1.20671
Pebp1	8482.6	7810.1	5372.1	8778.5	8896.3	8705.9	1.21768	1.34081	1.12399
Fam149b1	422.6	464.9	454.1	546.9	529	557.7	1.21765	1.17073	1.17638
Ikbip	7382.9	8002.2	6217.5	8521.3	7988.4	9791.6	1.21751	1.16104	1.06487
Nov	497	525	384.2	492.5	481.2	738.3	1.21747	1.07094	0.938095
Vps45	1684.8	1781.1	1519.8	1806.8	1983.1	2279.3	1.21732	1.14814	1.01443
Nrbp2	40.6	36.3	22.6	35.9	36	49.2	1.21709	1.22071	0.988981
Arhgef11	907.2	937.1	823.1	949.8	1125.1	1171.1	1.21692	1.17879	1.01355
Vps26b	3516.8	3568.2	3026.3	3886.2	4109.5	4308	1.21683	1.21248	1.08912
Stk3	4479.9	4401.8	3663.3	4820.7	4933.8	5509.2	1.21672	1.20947	1.09517
Dusp23	415	398.6	306.8	456.5	408.9	497.8	1.21671	1.22682	1.14526
Hadh	2679.9	2654.9	2091.4	2928.1	2544.4	3561.2	1.21646	1.153	1.1029
Plxnb1	889	926.9	656.9	995	947.5	1065.3	1.21635	1.22648	1.07347
Lnpep	6786.6	6233.7	5330.6	7254.1	7075.9	7991.1	1.21635	1.23916	1.16369
Slc30a5	1300.8	1301.8	1093.2	1381.2	1394.9	1719.2	1.21633	1.15912	1.06099
Ift140	1811.3	1875.3	1580.9	1947.9	2057.6	2401.3	1.21629	1.15893	1.03871
Antxr1	473.2	485	399.6	536.1	466	649.2	1.21616	1.13283	1.10536
Evi5l	429.5	397.7	354.2	427.9	468	540.8	1.2161	1.19151	1.07594
Mpst	2094.2	2266.7	2092.1	2498.3	2476.7	2871.8	1.21599	1.14137	1.10217
Tpm1	554.5	494.8	255.6	471	583.8	531.9	1.21596	1.40565	0.9519
Mfsd10	1098.2	1178.6	983.2	1179.2	1317.9	1466.6	1.21586	1.1551	1.00051
Hdhd3	647.8	657.1	558.8	740.9	772.8	752.2	1.21581	1.24492	1.12753
Pdhb	6095.2	6118.9	4647.2	6812.5	6395.5	7289.8	1.21567	1.22681	1.11335
Flad1	713.2	665	500.4	732.1	694.2	856.1	1.21495	1.22387	1.1009
Capn7	1573	1697.8	1444.1	1630.7	1826.4	2271.2	1.21494	1.10032	0.960478
Myo16	494.5	492.5	417.8	559.8	542.1	604.6	1.21476	1.21048	1.13665
Ece2	555.5	610.6	597.2	631.1	637.8	872.6	1.21448	1.05059	1.03357
Arhgef17	2142.4	2247.3	1762.2	2379.9	2276.7	2813.5	1.21428	1.16139	1.059
Dclk1	6501.5	7070.1	4595.6	7015.3	8547.7	6496.9	1.21427	1.33408	0.992249
Fkbp11	3042.1	3455.9	2715.5	3577.8	3567.4	4042.4	1.21426	1.15779	1.03527
Slc16a1	1408.7	1906	1461.8	1811.8	2183.5	1804.1	1.21415	1.18632	0.950577
Pura	3554.7	3843.6	2741.2	3998.3	3887.3	4425.3	1.21415	1.19755	1.04025
Cdkn2b	146.7	134.9	85.6	155.7	182.8	107.3	1.21405	1.53515	1.15419
Mmgt2	138.5	132.9	98.7	140.4	192.4	116.5	1.214	1.43696	1.05643
Map4k3	1578.5	1672.6	1285.4	1686.2	1900.8	1919.9	1.21391	1.21264	1.00813
Ror2	639.3	695.1	598.5	703.2	698.7	944	1.21367	1.08372	1.01165
Ppfibp2	1718.2	1577	1206	1730.8	1482.3	2249	1.21348	1.15455	1.09753
Sirt4	102.1	100.3	79.6	112.3	107.7	122.2	1.21348	1.2229	1.11964
Aebp1	5404	5993.3	4166.7	6172.7	6206.4	6506.5	1.21342	1.21842	1.02993
Coro2b	560	553.6	464.1	567.5	537.4	809.5	1.21341	1.08568	1.02511
Pde8a	1010.9	956.7	681.3	980.8	1108.8	1124.3	1.2133	1.2757	1.02519
Cdk18	790	850.3	698.4	904.4	985.7	947.4	1.21328	1.22044	1.06362
Pacs2	641.2	632.2	547.1	693.2	753.9	761.3	1.21307	1.22708	1.09649
Ndufb3	896.8	878	735.2	1003.6	995.6	1045.2	1.21291	1.23928	1.14305
Mdh1	7599.3	7762.5	5950.6	8578	8342.5	8923.5	1.21263	1.23389	1.10506
Rab2b	140.3	147.4	135.3	144.4	177.9	190.6	1.21253	1.14008	0.979647
Cenpb	108.9	105.1	114	122.9	130	144.8	1.2125	1.15427	1.16936
Slc29a3	473.4	476.3	373.2	534.1	471.4	598.4	1.21241	1.18364	1.12135
Lemd2	1428.7	1616.7	1531	1662.2	1654.4	2229.9	1.21198	1.05366	1.02814
Gla	3682.6	3684.3	1959.7	4020.7	3833.6	3448	1.21183	1.39162	1.09131
Plcb1	1603.6	1603.2	1013.3	1618.7	1741.9	1753.2	1.21177	1.28439	1.00967
Ssh1	204.7	208.5	170.9	228.7	228	250.9	1.21144	1.20374	1.09688
Myo1b	13953.4	13672.6	9852.7	14451.8	13928.1	17018.3	1.21131	1.20636	1.05699
Eml2	2972.9	3119.4	2257.7	3267.6	3281.7	3564.7	1.21126	1.218	1.04751
Ca13	3992.6	3801.6	2717.7	4172.9	4465.2	4093.8	1.21119	1.325	1.09767
Wdr35	3618.9	3548.6	2663.1	3716.4	3719.5	4470.7	1.21118	1.19708	1.04729
2015-09-02	13454	13226	11785.4	14741.3	14480.2	17361.5	1.21104	1.16833	1.11457
Git1	2430.5	2505.2	2038.3	2676.4	2712.1	3055.8	1.21083	1.18598	1.06834
Neu1	664.7	736.1	628	761.6	798.4	896.5	1.21081	1.14361	1.03464
Slc35c1	145.6	146.8	109.9	156.3	156.9	173.9	1.21079	1.2201	1.06471
Plgrkt	1435	1469.8	1200.1	1602.6	1477.3	1889.5	1.2106	1.15356	1.09035
Ttc30b	1343.7	1364.4	1264.5	1497.9	1517.8	1793.4	1.21057	1.14713	1.09785
Fam46a	1537.6	1723.6	1164.6	1953.8	1636	1767.9	1.21056	1.24292	1.13356
Rp2	1067.5	1151.1	961.6	1225.9	1277.5	1346.4	1.21055	1.18493	1.06498
Lmna	33190.8	34401.8	28740.1	37058	33964.9	45590.8	1.21053	1.12481	1.07721
Ada	3621.3	3608.1	2817.6	3998.1	3706.8	4456.2	1.21042	1.19908	1.10809
Mras	2019.4	2012.3	1530.9	2012.6	2236.8	2483.4	1.21037	1.19931	1.00015
Mut	5732.3	5808.5	4270.4	5810.9	6172.1	7151.5	1.21019	1.18892	1.00041
Dirc2	59.9	55.6	43.5	62	65.8	64.6	1.21006	1.28961	1.11511
Lmo7	47	47.9	28.5	47.8	44	57.5	1.20989	1.20157	0.997912
Asap3	30.5	38	33.5	34.6	41.8	47	1.2098	1.06853	0.910526
Btd	1716.5	1614.9	1216.3	1717.6	1741.8	2041.5	1.2096	1.22188	1.0636
Ppfibp1	107.8	116.6	63.4	114.4	111.1	122.6	1.20952	1.25278	0.981132
Adi1	2006	1736.9	1367.5	2102.8	1806	2272	1.20946	1.25912	1.21066
Pcnxl3	91.1	95.6	62.3	99.4	93.3	108.4	1.20924	1.22039	1.03975
Lphn2	4060.3	4137.4	2742.2	4082.6	4506.4	4638.8	1.20913	1.24847	0.986755
Chkb	632.5	696.1	547.6	711.6	727.4	829.4	1.20904	1.15703	1.02227
Akr1a1	6810.3	6783.6	5288.2	7591.7	7232.3	7997.7	1.20864	1.22799	1.11913
Bad	35	36.5	45	53.3	42.1	45.4	1.20858	1.17055	1.46027
9230110C19Rik	438.3	449.9	364.7	488.3	500.1	525.7	1.20848	1.21336	1.08535
Nrp2	193.6	133.4	125	166.6	122.4	257.2	1.20841	1.11842	1.24888
Mp68	775.6	818.2	501.7	875.7	760.1	895.7	1.20806	1.23934	1.07028
Tbc1d4	909.9	1007	892.6	1060	968.1	1365.7	1.20797	1.06765	1.05263
Dlg1	3591.4	3701.4	2677.4	3724.5	4018.7	4298.4	1.20776	1.2139	1.00624
Sumf1	678.6	759.9	528.1	770.5	865.8	738.8	1.20772	1.27042	1.01395
Pcdhga4	650.1	739.9	550.7	769.3	876.8	697.4	1.20755	1.27545	1.03974
Snx30	804.6	850.1	756.1	883.7	850.9	1176.4	1.20748	1.07994	1.03952
	386.3	399.9	350.4	412.8	407	552.2	1.20711	1.09263	1.03226
Atp6v1b2	6213.9	6411.7	5412.1	7578.5	7278.4	6912.8	1.2069	1.25652	1.18198
Dcaf11	299	315.4	243.8	325.6	349	361	1.20671	1.20637	1.03234
Dstyk	1247.5	1306.8	1184.8	1460.2	1528.2	1523.6	1.20671	1.19939	1.11739
Itga9	224	252.1	179.3	261.2	266.1	263.5	1.20659	1.2223	1.0361
Slc25a20	2563.9	2756.7	2205	2860.1	2825.7	3394.2	1.20655	1.14594	1.03751
Slc38a7	782.9	783.7	530	849	827.1	853.2	1.20638	1.27586	1.08332
Mtif2	1127.7	1188.3	968.6	1249.5	1194.5	1518.4	1.20636	1.13311	1.0515
Sbno2	399.7	738.9	491.1	724.3	775.2	466.2	1.20617	1.21911	0.980241
Tcp11l2	1014.9	999.3	751.1	1100.2	992.5	1242.5	1.20609	1.19556	1.10097
Acot13	3343.8	3152.3	2514.1	3773.5	3430	3660.6	1.20576	1.27127	1.19706
Ugt1a7c	952.6	1053.6	768.5	974.6	1592.5	778.4	1.20572	1.40887	0.925019
Pfkl	6220.2	7263.7	5527.2	7465.1	8641.7	6811.2	1.20551	1.25924	1.02773
Zcchc24	396.4	450.9	339.7	436.9	444.1	549.7	1.20531	1.11434	0.968951
Eps15l1	117	119.1	105	133.4	122	155.7	1.20522	1.13967	1.12007
Purb	2939.7	3050	2363.6	3226.5	3319	3521.4	1.20514	1.20908	1.05787
Apool	2245.3	2363.6	1906.7	2425.2	2404.3	3022.7	1.20514	1.13095	1.02606
Ikbip	9157.3	9735.5	7301	10249.1	9866.7	11445.8	1.20493	1.18075	1.05276
Ppp6r2	826.3	760.6	636.5	830.3	881.3	967.3	1.20487	1.22511	1.09164
Medag	113.4	128.4	108.6	115.2	217.6	89.3	1.20462	1.40422	0.897196
Robo1	676	695	501	721.7	752.9	780.3	1.20454	1.23294	1.03842
Dynlt3	163.1	174.3	140.1	195.6	207.8	171.6	1.20419	1.28308	1.1222
Gpx1	2440.4	2633.1	2047.3	2715	2429.2	3430.4	1.20416	1.09909	1.0311
Dpysl2	17860.6	18305.4	15969.2	19107.6	19314.1	24352.8	1.20407	1.121	1.04382
Abcc10	25.4	32.6	24.9	34.3	33.1	32.4	1.20386	1.17217	1.05215
Akr1e2	1824.5	1933.1	1548.2	2059.7	2028.1	2299.6	1.20385	1.17422	1.06549
Ttc9	179.5	172.9	120.4	184.6	203.4	181.1	1.20368	1.32288	1.06767
Lrrc1	472.2	469.1	404	496.7	516.4	606.2	1.20367	1.16035	1.05884
Adcy3	522.1	525.3	449.8	616.8	680.5	504.6	1.20351	1.33043	1.17419
Sqrdl	5755.1	6413.2	4794.6	6194.5	7302.1	6916.5	1.2034	1.20421	0.965898
Nf2	2036	1995.2	1519.4	2004.1	2334	2340.4	1.2032	1.23431	1.00446
Fam13c	666.1	629.4	470.4	614.3	790.4	720	1.20318	1.27723	0.976009
D6Wsu163e	734.5	750.3	640.9	764.2	833.9	959.4	1.20313	1.14872	1.01853
Qdpr	4013.4	4134.9	3220.1	4446.6	4197.9	5030.8	1.20292	1.17532	1.07538
Mtor	5641.6	6219.8	5118.2	6189.8	6807.7	7424.9	1.20276	1.14637	0.995177
Haghl	726.8	709.7	608.7	790.8	850.6	818	1.20252	1.24499	1.11427
Fgd6	1063.4	952.6	760.7	1063.8	858.5	1416.7	1.20251	1.12199	1.11673
Ccpg1	947.5	987.6	703.6	1031.4	907.7	1233.8	1.20245	1.14658	1.04435
Sh2b1	502.8	553.3	407	571.6	591.3	596.4	1.20245	1.21098	1.03307
Fgf7	206.9	293.8	221.1	259	374.3	234.6	1.20241	1.22995	0.881552
Farp2	1249.5	1366.6	1063.9	1250.6	1524.5	1649.4	1.20231	1.14178	0.915118
Gnpda2	2874.8	3019.8	2108.5	3305.9	3128.2	3188.1	1.20231	1.25463	1.09474
Cnnm2	952.8	1133.9	845.5	1176.5	1260.2	1088.6	1.20227	1.23103	1.03757
Adck5	1119.8	1168.6	848.2	1167.6	1297.1	1305.7	1.20207	1.22208	0.999144
Sidt2	728	783	652.3	837.2	846.2	916.9	1.20201	1.17286	1.06922
Ak1	7073.7	7310.7	5078.8	7455.5	7617.7	8319.3	1.20188	1.21661	1.01981
Pafah1b3	1685.7	1656.1	1490.9	1853.6	1838.8	2115.1	1.20171	1.17331	1.11926
Hint3	395.4	377.1	312.8	397.6	390.2	516.4	1.2017	1.1419	1.05436
Inpp5a	605.9	593.7	479.6	594.3	710.3	713.2	1.20164	1.2155	1.00101
Gna11	7057.6	7136.9	5777.6	7415.5	8481.1	8101.4	1.20158	1.23091	1.03904
Slc35e3	288.1	247.5	195.7	278.5	265.9	334.3	1.20156	1.22834	1.12525
Eci2	2226.6	2257	1699.8	2272.4	2296.9	2858.9	1.20131	1.1548	1.00682
Prkacb	1198.3	1207.9	1164.9	1286.6	1325.9	1676.5	1.20103	1.10102	1.06515
	9761.4	10000.4	7309.6	10618.3	10859.3	11030.9	1.20084	1.24076	1.06179
Yif1a	739.4	752.4	607	824.5	879.2	816.5	1.20078	1.25327	1.09583
Gpr89a	301.7	335.8	291.2	345.1	377.5	392.5	1.20071	1.15247	1.0277
Kif13a	1326.9	1353.7	1138.5	1358.1	1395.2	1832	1.20062	1.10477	1.00325
Pofut2	4432.8	4777.6	3732.1	5068.7	4821.1	5649	1.2006	1.16218	1.06093
Man2c1	2065.6	2035	1671.8	2084.7	2243.6	2601.4	1.20049	1.16766	1.02442
Ces2e	2595.7	2574.8	1052.5	2698	3333.5	1439.1	1.20048	1.66281	1.04785
Ehd3	4968.7	5158.3	4089.2	5461	6169.3	5433.5	1.20031	1.25767	1.05868
2015-09-09	10448.8	10587.4	7753.1	11463.6	10564	12527.7	1.20028	1.20104	1.08276
Snx33	1035.2	1117.4	860.2	1153.4	1148	1314.1	1.20005	1.16373	1.03222
Suox	1248.6	1402.8	1151.1	1408.9	1456.2	1697.6	1.19992	1.12185	1.00435
Ckb	2321.8	2394.7	2383.4	2695.7	2623.1	3200.3	1.19989	1.11316	1.12569
Coq3	890.1	944.7	802.9	971	978.2	1215.5	1.1998	1.11536	1.02784
Tpk1	665.7	662.2	496	737.3	694.1	756.9	1.19979	1.23588	1.11341
Gtpbp8	389.4	423	384.9	469.3	505.7	461.3	1.19962	1.20683	1.10946
Snx18	2471.3	2857.5	2400	2830.4	3245.8	3193.3	1.19935	1.15572	0.990516
Zfx	33.7	29	32.8	34.3	38.4	41.8	1.19895	1.17638	1.18276
Park7	6825.3	6606.5	5291	7054.5	7276.6	8116.4	1.19894	1.20455	1.06781
Vcl	47961.6	48743.6	39695.1	51929.3	47959.2	63636.8	1.19886	1.12947	1.06536
Tmtc4	924.5	1034.7	914.9	1018.8	1062.6	1364.2	1.19884	1.0676	0.984633
Leprel4	3527.5	3908.7	3515.9	4176.7	3626.2	5326.3	1.19878	1.05095	1.06856
Abcc4	2040.9	2024	1650.8	2106.9	2308.2	2434.8	1.19844	1.20145	1.04096
Stx6	325.7	422.2	307.4	462.4	444.6	357.7	1.19843	1.24315	1.09522
Nid1	1709	1633	1674.3	1785.8	1742.8	2483	1.19841	1.06691	1.09357
Timm17b	509.7	536.1	474	593.5	596.6	631.2	1.19838	1.1782	1.10707
Mthfs	689.6	692	528	708.2	718.2	862	1.19837	1.16918	1.02341
Dgat1	388	430.6	282.1	426.8	428.9	463	1.19806	1.20065	0.991175
Bcat2	4791.7	4941.6	3798.8	4971.4	5088.7	6151.7	1.19803	1.15099	1.00603
Ssfa2	1720.6	1683.2	1308.8	1776.8	1667.4	2201.1	1.19792	1.15114	1.05561
Mterfd3	237.8	259.2	230.4	275	290.3	305.8	1.19755	1.15462	1.06096
Dock9	881.1	1003.5	858	1007.2	1161.2	1116	1.19755	1.16487	1.00369
Tpmt	1554.3	1554.7	1356.7	1733.7	1640.1	1974	1.19753	1.15882	1.11513
Ifitm2	1432.4	1473.5	1059.7	1545.5	1564.5	1638.6	1.19745	1.2277	1.04886
Slc25a15	725.6	786.4	742.9	866.3	958.9	874.8	1.19739	1.19349	1.1016
Pon2	1594.3	1792.5	1466.8	1832.8	2032.2	1946.4	1.19734	1.18584	1.02248
Pdxk	3074.9	3241.7	2924.9	3726	3748.1	3591	1.19733	1.21203	1.1494
Suclg1	5153	5502.9	4009.3	5490.1	5379.3	6689.5	1.19732	1.14268	0.997674
Ganab	73.5	89.7	78.8	92.8	96.7	100.2	1.19711	1.12463	1.03456
Pisd	105	114.1	122.5	140.4	152.6	115.9	1.19701	1.23838	1.2305
Iars2	9342	10127.2	7399.7	9999.6	10568.2	11593.7	1.19698	1.1735	0.9874
Pbx1	836	936.8	866.4	1009.4	1021.2	1128	1.1968	1.12611	1.0775
Ppib	13641	14277	11230.6	15505.4	14566.5	16779.1	1.19675	1.17894	1.08604
Dip2c	1070.8	1119.5	828.5	1118.8	1293.4	1200.1	1.1966	1.2383	0.999375
Lhpp	467.4	457	347.8	499.7	491.2	531.4	1.19659	1.23124	1.09344
Rab8b	538.8	620.9	492.1	648	706.1	622.4	1.19657	1.21662	1.04365
Adh5	5133.7	5502	4483.6	5811.3	5701	6579	1.19657	1.15289	1.05622
Atp5o	8543.8	9310.9	7014.3	9628.9	9474.4	10640.5	1.19602	1.17017	1.03415
Mt1	653.5	1359.5	595.8	1265.3	1044.3	810.4	1.19595	1.1812	0.93071
Gamt	1583.6	1599.8	1626.1	1861.4	1576.9	2312.3	1.19568	1.06584	1.16352
Myo6	4689.4	4844.4	3741.1	4941.7	4902.1	6024.7	1.19538	1.14656	1.02009
Ogg1	106.5	121.8	127.2	189.7	115.7	119.5	1.19522	1.22651	1.55747
Adcy6	2041.2	2163	1663.3	2174.2	2444.2	2394.4	1.19519	1.20701	1.00518
Picalm	4930	4818.8	3557.5	5182	5056.2	5664.6	1.19513	1.22228	1.07537
Eya4	201.5	199.5	181.2	217.1	224.1	254.6	1.19512	1.15892	1.08822
Syne3	4747.9	4943.3	4791.6	5212.2	5012.9	7080	1.19487	1.05035	1.0544
Npepps	11934.1	12408.2	10396	13442.6	14315.4	13737.3	1.19451	1.21723	1.08336
Prdx5	8574.8	9912.2	9458.3	10992.5	12590.8	9793.4	1.19436	1.21749	1.10899
Atp2b1	2615.3	2883.3	2808.8	3127.6	2974.2	3817.6	1.19404	1.07198	1.08473
Spcs3	1406.1	1467.9	1146.6	1508.9	1574.8	1717	1.19403	1.17946	1.02793
Hacl1	144.2	168.3	127.5	170.6	149.7	205	1.19386	1.08283	1.01367
Atp6v0a1	3342	3408.4	2948.6	3766.5	3361.7	4449.8	1.19373	1.12132	1.10506
Tmem160	417.6	446.3	425	535.6	599	403.9	1.19365	1.30219	1.20009
Kdm5a	390	428.2	438.9	489.7	544.4	466.1	1.19338	1.1926	1.14362
Synpo	638	678.2	506	717.9	738.9	717.6	1.19328	1.2302	1.05854
Rhot2	336.5	322.2	280.1	379.5	380.6	360	1.19312	1.262	1.17784
Pip4k2a	2569.5	2691.9	1972.6	2891.5	2766.2	2972.7	1.19303	1.21293	1.07415
Rapgef2	1742.7	1809.6	1413.8	1797.1	2007	2119.5	1.19281	1.18015	0.993092
Phc1	235.1	253.7	224	275.5	255.2	319.5	1.19276	1.11095	1.08593
Pddc1	591.7	599.3	533.6	691	623.4	742.2	1.19251	1.16021	1.15301
Snx6	5471.6	5644	4488.1	5931.4	5716	6956.9	1.1923	1.14955	1.05092
Afap1	3542.3	3636.7	2407.3	3641.6	3494	4291.5	1.19202	1.18061	1.00135
Pik3ca	618.3	631.3	537.1	670.5	782.5	676.6	1.19192	1.24358	1.06209
Dmd	1580	1632.2	1244.4	1654.1	1787.1	1869.8	1.19172	1.19627	1.01342
Commd5	908	894.2	864.7	1020.2	1026.9	1130.8	1.19161	1.16385	1.14091
Snapin	870.7	889.9	711	1025.7	974.4	944.9	1.19154	1.24936	1.1526
Rmdn3	944.5	1038.5	833.4	1133.5	1140.2	1082.1	1.19152	1.21465	1.09148
Slc30a6	450.5	450.7	385	482.2	485.1	565.2	1.19149	1.15747	1.06989
Rdh14	838.4	813.8	638.4	874.3	872.6	982.2	1.19143	1.20293	1.07434
Nfkb2	2466.9	3943.7	2203.4	3772.5	4030	2460.3	1.19141	1.2693	0.956589
Fam120b	262.5	269	223.4	281.3	285	333	1.19128	1.15008	1.04572
Clpp	1754.2	1735	1431.3	1772.8	1848.4	2240.5	1.19128	1.14367	1.02179
Wdfy2	1253.4	1390.9	1019.9	1379.2	1363.1	1622.7	1.19126	1.13751	0.991588
Ppp1r21	3152.8	3297.4	2648.6	3374.2	3368.5	4095.4	1.19116	1.13399	1.02329
Cbr3	5168.1	5328	3748.6	5681.3	5521.8	5764.1	1.19112	1.23428	1.06631
Tprg1l	432.1	451.7	412.6	507.6	512.8	523.6	1.19099	1.18061	1.12375
Patz1	121.7	134	152.8	163.5	135.1	187.8	1.1907	1.04114	1.22015
Itgb5	3509.4	4005.7	3554.4	4075	3982.4	5122.6	1.19066	1.06578	1.0173
Erlec1	2868.5	3078.7	2334.6	3238.5	3155.7	3465.7	1.19055	1.1812	1.05191
Rab6b	371	382.3	413.3	413.5	490.7	484.6	1.19047	1.1365	1.08161
Atp5f1	6893.9	7149.1	6044.9	7382.6	7717.9	8812.1	1.1904	1.1445	1.03266
Mtcl1	274.1	267	286.3	284	274.1	426.7	1.19023	1.00868	1.06367
Bsg	2219.3	2464.1	1891.9	2617.3	2420	2788.5	1.19018	1.1564	1.06217
Ttc7a	431.4	477.4	403.1	482.5	501	577.6	1.18995	1.11698	1.01068
Bloc1s4	215.2	211.4	208.2	255.4	262.5	237.4	1.18982	1.23427	1.20814
Rufy2	1128.9	1155.1	991.7	1179.6	1112.1	1605.5	1.18973	1.0675	1.02121
Cbll1	102.3	98.4	71.4	108.6	101	114.1	1.18964	1.23439	1.10366
Dhrs11	618.7	709.6	585.7	856.5	790.6	629.6	1.1895	1.2716	1.20702
B4galt7	188.9	205.9	174.7	219.1	226.5	231.8	1.18946	1.17078	1.06411
Edil3	2465.9	2153	1488.5	2704.9	1654.8	2904	1.18933	1.19723	1.25634
Tbc1d9b	1995.9	1995.2	1815.7	2243.9	2124.7	2537.3	1.18928	1.14634	1.12465
Atp6v1e1	4504.3	4590.3	3800.4	5242.9	4960.6	5131.3	1.18921	1.21605	1.14217
Usf2	54.3	48.9	55.5	67.7	61	60	1.18904	1.23276	1.38446
Itgb3	275.9	282.2	274.6	339.8	334.7	315.6	1.18902	1.21139	1.20411
Coro1b	7990.3	8232.4	6685.5	9034.2	8636.7	9564.4	1.18889	1.18454	1.0974
Tmem106b	1050.8	991.3	728.5	1046.3	1062.4	1185	1.1888	1.22613	1.05548
Kdelc2	1797.9	1986.8	1683.3	2167.7	2017	2315.6	1.18879	1.14021	1.09105
Rnf11	446	423.8	300.7	487.8	489	414.6	1.18872	1.34824	1.15101
Csgalnact2	726.8	757.9	637.4	770.7	807.9	943.4	1.18845	1.13137	1.01689
Thumpd2	127.1	141.6	136.2	165.3	157.1	158.8	1.18844	1.16055	1.16737
Sirt5	1224.1	1341.5	1043.4	1372.1	1346.7	1569.9	1.18833	1.14001	1.02281
Fbxo45	52.9	56.8	45.4	62.7	55.8	65.8	1.18827	1.15949	1.10387
Fam213b	732.4	833.8	605.5	891.7	778.5	910.2	1.18819	1.16043	1.06944
Snx1	5661.9	5652.2	4660.8	6378.2	5816.9	6785.7	1.18816	1.1825	1.12845
Irak4	1223.5	1237.8	1082.9	1308.3	1366.4	1536.3	1.18814	1.15254	1.05696
Urm1	217	148	126.9	164.9	250.2	169.3	1.18805	1.51	1.11419
Wdr59	946.7	1095.5	891.6	1061.3	1134.6	1289.4	1.18798	1.10508	0.968781
Csrp2	4559.8	5034.2	3945.4	5303	4480.3	6298.9	1.18781	1.0895	1.05339
Gstp1	5413.9	5491.2	4563.4	5927.3	6072.7	6372.1	1.18771	1.19348	1.07942
Vwa8	7272.1	7814.9	6034.1	8108.6	8409.8	8564.1	1.18756	1.19275	1.03758
Tbc1d22a	2560	2473.8	1920.2	2676	2674.2	2906.2	1.18729	1.21761	1.08174
Camk2d	2474.5	2661.5	1838.9	2844.2	2572.1	2863.5	1.18709	1.20352	1.06865
Npc2	5572.7	6069.6	3919.8	6409.9	6608.8	5454.8	1.18708	1.30325	1.05607
	253.5	308.2	267.5	323.4	344.2	316.7	1.18705	1.15963	1.04932
Gbe1	1042.5	1160.8	845.8	1144.3	1277.4	1197.4	1.18694	1.20687	0.985786
Vdac1	14017.5	15929.9	14481.3	18270.6	16818.7	17641.4	1.18686	1.15383	1.14694
Uap1l1	4352.8	4505.5	3975	5383	4322.4	5517.9	1.18623	1.14444	1.19476
Ccdc127	805.6	883.1	683.7	846.6	947.9	1019.6	1.18618	1.14533	0.958668
Cog6	2860.9	2949.3	2649.9	3230.4	3171.5	3632.8	1.18612	1.14336	1.09531
Ralbp1	1135.6	1152.8	870.3	1152.2	1152.1	1442.2	1.18609	1.13899	0.99948
Fam188b	536.4	570.1	512.9	589	591.6	740	1.18599	1.09012	1.03315
Bbs9	543.5	583.2	581.5	646.9	611.7	767.2	1.18593	1.08062	1.10922
Klhl13	37.3	41.8	36	43.2	49.7	43.6	1.18593	1.19409	1.03349
Ccnyl1	444.3	473.1	394.5	486.5	518.9	550.3	1.18584	1.15883	1.02832
Nucks1	1436.4	1446.6	1176.8	1608.9	1448	1756.8	1.1857	1.16524	1.11219
Ptgis	2315.7	2559.5	1552.5	2639.3	2734.4	2247.5	1.18568	1.30683	1.03118
Slc25a1	4800.3	5157.3	3914.9	5335.9	5489.5	5622.7	1.18566	1.19325	1.03463
Spats2l	2255.5	2182.7	1499	2285.5	1883.8	2868.5	1.18537	1.13244	1.0471
Mxra8	1126.3	1143.8	984.9	1406.8	1242.6	1208.2	1.18513	1.24461	1.22994
Ddt	4085.2	4007	2979.7	4552.1	4294.3	4275.1	1.18512	1.26618	1.13604
Pcbd2	926.5	896.4	636.3	937.8	926.9	1049.1	1.18486	1.21661	1.04618
Fam136a	712.3	696.4	691.2	748.7	812.4	926.9	1.18482	1.12504	1.0751
Itsn1	6623.2	7072.4	5521.2	7039.2	7197.7	8529.4	1.18471	1.13049	0.995306
Rin2	218.1	242.6	207.4	245.5	233.4	312.5	1.18455	1.06422	1.01195
Vwa5a	13127.4	13605.8	9196.1	14547.4	15069.2	12939.3	1.18443	1.29887	1.06921
Pak4	460.5	480.4	409.7	516.3	557.9	525.4	1.18436	1.20683	1.07473
Gramd4	1342.3	1374.1	1228.5	1392.6	1541.7	1737.2	1.18419	1.12745	1.01346
	637.8	670.4	556.2	680.6	612.8	913.8	1.18387	1.05446	1.01521
Map4k2	239.5	263.7	178.3	252.4	267.7	286.7	1.18386	1.1767	0.957148
Agk	3064.3	3258.5	2402.1	3315.3	3226.8	3786.3	1.18378	1.15573	1.01743
Zmat3	40.5	47	38.2	52	50.4	46.4	1.18377	1.20188	1.10638
Chpf2	2828.6	2871.7	2204.1	2921.3	3002	3433.3	1.18372	1.16697	1.01727
Stam	4564	4508.4	3629.7	4981.2	4994.3	5060.2	1.18372	1.22578	1.10487
Klhl22	2637.5	2352.3	2112.5	2760.6	2801.8	2843.7	1.18357	1.24583	1.17357
Acad9	4332.2	4529.9	3631.5	4608.8	4751.7	5425.9	1.18352	1.14692	1.01742
Jam3	226.4	222.3	169.8	225.1	251.5	255.3	1.18335	1.21551	1.0126
Zfp185	670.7	648.3	554.9	659.5	637	920.7	1.1832	1.07754	1.01728
Hadhb	8870.4	9562.3	7529.4	10001	10108.4	10606.1	1.18309	1.17656	1.04588
Nbea	910.4	961.7	905.8	1047.1	1087	1152.3	1.18305	1.14276	1.0888
Cdc42ep3	482.5	322	390.5	357.4	258.6	797.7	1.18301	0.864561	1.10994
Pdia5	6011.6	6992.4	5573	6945.8	6421	8607.6	1.18288	1.06378	0.993336
Ralgapa2	445.9	429.2	477	454	508	637.2	1.18275	1.06158	1.05778
Pgm3	5221.7	5550.5	4710.5	5803.3	5561.9	6945.6	1.18266	1.10761	1.04555
Sod1	9226.9	8931.4	7429.1	10070.1	10246.3	9944.1	1.18263	1.2418	1.12749
Nudt3	675.3	676.8	503	674.9	747.2	771.7	1.18258	1.20537	0.997193
Efemp1	674.5	850.6	707.6	809.3	999.6	831.4	1.18256	1.16089	0.951446
Inpp5e	206	182.2	148.1	181.9	194.4	257.8	1.18236	1.13927	0.998353
Slc37a3	85.8	80.8	64.3	91.9	87.1	94	1.18233	1.23363	1.13738
Gbp6	5099.1	5332.4	1272	7146.9	5627.1	1063.2	1.18231	1.93417	1.34028
Stat5a	3439.9	3617.1	3099.4	3985.6	3757.1	4264	1.18218	1.15279	1.10188
Renbp	364.3	367.5	258.1	380.2	405.2	384.8	1.18214	1.25543	1.03456
Stk25	1107.9	1106.9	846.7	1153.5	1212.5	1252.3	1.18187	1.2111	1.0421
Glo1	4103.3	4118.2	3401.9	4777.3	4382.4	4576.8	1.1818	1.21803	1.16005
Myh10	56759.2	61915	52128.6	64823.8	61938.1	75076.2	1.1817	1.11152	1.04698
Cpne2	2232.2	2253.3	1842.1	2386.6	2480.3	2609.8	1.1816	1.18838	1.05916
Uqcrc2	4495.8	4682.7	3940.4	4957.9	5048.1	5495.2	1.18159	1.16037	1.05877
Flot2	3285.4	3504.6	3340.8	3641.7	4074.4	4251.6	1.18132	1.12719	1.03912
Fastk	102	112.5	73.4	107.6	111	121.5	1.18131	1.1759	0.956444
Prkra	1929.9	2135.5	1675.3	2182.9	2139.8	2458.4	1.18123	1.13433	1.0222
Mettl21A	60.8	65.5	54.7	72.3	77	64.5	1.18122	1.2421	1.10382
Entpd4	229.9	274.6	224.5	265.5	275.5	320.1	1.18121	1.08395	0.966861
Anxa4	10370.1	10680.5	8452.2	11764.2	10297.6	12782.7	1.18106	1.15309	1.10147
Ndufb4	1575.6	1901.4	1718.5	2065.4	2054.2	2016.3	1.181	1.13804	1.08625
Yes1	620.7	695.3	561.9	704	676.8	836.9	1.18095	1.09831	1.01251
Mcfd2	223.5	252.8	212.4	265.3	270	277.9	1.18078	1.15069	1.04945
Tbl2	2001.7	2381.4	2050.4	2475.6	2356.1	2764.3	1.18069	1.09023	1.03956
Foxred2	191.5	208.1	131.3	239.6	168.3	218.9	1.18064	1.20183	1.15137
Mblac2	287.3	290.3	243.7	310.1	308.9	350.6	1.18057	1.15918	1.06821
Pros1	411.4	525.2	389.3	516.3	554.2	494.8	1.18056	1.17059	0.983054
2015-09-08	3551.3	3553.5	2790.8	4014.6	4215.4	3451	1.18042	1.29723	1.12976
Tspo	195	192.7	160.6	226.1	235.5	185.6	1.18038	1.30654	1.17333
Sulf2	408	402	371.5	458.9	484.3	451.3	1.18028	1.21939	1.14154
Ppt2	876.8	979.6	943	1051.5	1014.7	1237.6	1.18018	1.07469	1.0734
Uqcrfs1	2342	2341.7	2220.2	2565.6	2698.3	2883.5	1.18012	1.15388	1.09561
Engase	286.5	285.3	197.9	284.9	308.3	315.1	1.18007	1.22765	0.998598
Msra	471	494	471.3	531.8	561.4	601.7	1.18005	1.1325	1.07652
Gfra1	101.2	90.7	36.6	83.8	113.2	72.6	1.17987	1.54753	0.923925
Tmem41a	78.7	88.6	79.1	97.7	100.8	92.2	1.17979	1.18366	1.10271
Ctc1	2236	2419.6	2149.3	2516.4	2455.1	3056.7	1.17977	1.08812	1.04001
Hadha	15927.4	17189.8	13522.4	17832	17879.4	19310.3	1.17972	1.16278	1.03736
Ndufa6	2602	2823.9	2647.1	3123.1	3196.7	3202.9	1.17957	1.15515	1.10595
Scrn1	4183.3	3953.5	3134.6	4365.1	4044.8	4883.7	1.17941	1.18648	1.10411
Ccm2	1677.8	1721.4	1207.9	1712	1822.5	1897.1	1.17896	1.2066	0.994539
Dock1	5786.8	6211	5328.2	6094.1	6347.5	7984.3	1.17892	1.0782	0.981179
	782	872.2	682.1	829.6	863.2	1061.5	1.17892	1.08911	0.951158
Enpp4	983.2	1091	748.6	1166.6	1302.5	858.7	1.1789	1.34219	1.06929
Fam162a	1757.9	2218.5	1305.7	2049.3	2461.4	1716.2	1.17887	1.27992	0.923732
Ttc21b	2131.3	2304.1	1860	2298.6	2407.8	2714.5	1.17878	1.13023	0.997613
Kif1a	610.3	614.6	510.6	643.1	710.7	691.7	1.17862	1.20316	1.04637
Rab40c	186.2	231	209.2	238.4	259.3	240.5	1.17848	1.13062	1.03203
Lman2	8663.9	9323.8	7515.2	9992.8	10050.2	10010.8	1.17845	1.19027	1.07175
Cst3	1189.4	1231.4	1001.1	1275.7	1244.1	1512.5	1.17838	1.12869	1.03598
Mic1	2677.2	2783.8	2013	2927.1	3011	2868.2	1.17826	1.23793	1.05148
Ssc5d	121.9	125.1	114.9	126.1	125	175.3	1.17823	1.04625	1.00799
Nhlrc3	2117.7	1905.2	1105.5	2200.7	2038.4	1802.3	1.17803	1.40801	1.1551
Gna12	714.1	775.7	762.4	730.7	875.9	1046.5	1.178	1.04454	0.941988
Gas7	604	504.6	310.6	550	631.9	489.9	1.17799	1.44983	1.08997
Pafah1b2	668.5	677.6	639.3	822.5	828.3	687.5	1.17775	1.25355	1.21384
Dcx	966.4	983.7	660.4	981.4	1115.7	977.2	1.17767	1.27553	0.997662
Prkab2	773.6	945.5	987.3	1127.3	1033.4	1026.2	1.17754	1.11791	1.19228
Ccdc91	1751.1	1737	1313.8	1806.4	1750.7	2097.3	1.17753	1.16596	1.03995
Tspan9	471.6	472.6	457.9	465.8	509.7	675.4	1.17745	1.04836	0.985612
Cotl1	3014.9	2857.9	2371.2	3134	2878.6	3693.8	1.17739	1.14983	1.09661
Cyp4v2	285.1	344.4	243.8	359	393.4	275.8	1.17737	1.27916	1.04239
Dld	7035	8049.8	7268.7	8755.9	8468.4	9090.6	1.17722	1.12441	1.08772
Ap5b1	192.1	189.2	141.3	217.4	206.5	191.3	1.17719	1.2826	1.14905
Ndufs3	3414.3	3538.3	3031.3	3866	4006.1	3880.4	1.17715	1.19826	1.09262
Hgsnat	664.9	758.1	665.4	785.1	795.8	876.9	1.17688	1.11057	1.03562
Itfg3	839.9	832.9	786.9	899.6	969	1026.1	1.17685	1.1536	1.08008
Msi1	574.1	570.3	479.4	604.5	551.3	754.9	1.17668	1.10108	1.05997
Atp5h	3689.4	3739.7	3081.2	4201.2	3913.3	4251.1	1.17652	1.18965	1.12341
Mrps36	488.1	527.7	476.4	544.6	570	640.7	1.17632	1.11005	1.03203
Ptges	395.9	509.8	412.4	484.2	650.6	415.7	1.17631	1.23054	0.949784
Cpt1c	1065.8	1140.1	797.1	1193.2	1268.1	1071	1.17626	1.27055	1.04657
Hspa12b	1038.8	1146.2	936.9	1146.2	1148.8	1376.5	1.17605	1.10172	1
Npdc1	65.9	75.7	76.6	90.3	101.8	64.5	1.17599	1.26133	1.19287
Arl4c	125	145	95.6	179.9	144.9	105.1	1.17588	1.34996	1.24069
Crtc1	217.4	219	242.1	239	246.4	312.4	1.17583	1.0527	1.09132
Ank3	6410.4	7193.8	4915.9	6729.3	8359.1	6687.1	1.17578	1.24598	0.935431
Slc25a12	8824.5	9354.2	7809.8	9927.3	9546.1	11083.1	1.17577	1.13455	1.06127
Col6a1	5650.4	6222.4	5786.4	6616.8	5119.8	9025.8	1.17573	0.977333	1.06338
Gtdc1	114.4	112.2	112.7	121.2	115.8	161.9	1.17566	1.0538	1.08021
Ap2s1	2377.8	2387.7	2266.5	2601.1	2944	2721.9	1.17563	1.19142	1.08937
Pde8b	30.6	30.7	35.7	47	36.3	30.7	1.17526	1.25452	1.53094
Birc2	369	444.3	385.9	477.1	472.2	459.7	1.17495	1.14346	1.07382
	968.9	991.7	791	1026	1023.6	1183.2	1.17488	1.14972	1.03459
Twf2	2276.2	2487.3	2689.9	2878.1	2498.4	3379	1.1747	1.0385	1.15712
Nit1	656	707.7	593.7	773.6	773.6	752.1	1.17467	1.18887	1.09312
Gtpbp3	168.9	198.3	162.2	215.7	201.5	204.6	1.17454	1.15728	1.08775
Speg	652.4	626.2	530.6	718	716.4	690.5	1.1745	1.23997	1.1466
Arf6	5483.9	5465.1	4396.3	5845.6	5446.6	6729.1	1.17439	1.14509	1.06962
Grhpr	2878.2	2956	2368.8	3115.5	3149	3366.9	1.17413	1.17648	1.05396
Usmg5	186.2	194.7	164.5	212.5	214.2	213.6	1.174	1.18792	1.09142
Ndufs7	1471	1531	1103.5	1553.6	1558.2	1707.1	1.17377	1.18117	1.01476
Eps15l1	6987.6	7138	5935.9	7503.1	7495.8	8548.3	1.17375	1.14724	1.05115
Tbc1d32	143.6	155	134.9	146.8	169.9	192.1	1.1737	1.09245	0.947097
Ifnar2	219.3	302.8	194.5	325.3	328.8	186.7	1.17332	1.3153	1.07431
Bbs1	116.2	123.2	125	134.6	136.8	156.1	1.17316	1.09347	1.09253
Mtnd2	158.1	167.8	124.1	175.3	167.9	184.7	1.17311	1.17575	1.0447
Ahnak	266037	280754	258393	281858	323794	338917	1.17311	1.12335	1.00393
Rap2a	533.9	538.2	437.1	555.6	645.6	568.9	1.17287	1.23162	1.03233
Add3	4482.9	4551.4	4014.9	4438.6	5327.3	5538.6	1.17283	1.14004	0.975216
Tax1bp3	1269	1240.5	1010.2	1381.5	1435.4	1311	1.1728	1.25157	1.11366
Plxna2	64.6	77.3	76.2	81	89.5	85.2	1.1724	1.11075	1.04787
Selp	300.8	995	439.1	808.6	1031.7	193.6	1.17234	1.28324	0.812663
Slc30a9	1914.4	2096.9	1624.4	2104.7	2299.2	2201.4	1.17205	1.18343	1.00372
Rnase4	83.4	106.2	106.9	114.5	112.1	120.9	1.17201	1.06335	1.07815
Dpy19l3	284.9	300.9	240	323.3	331.6	312.9	1.17195	1.21076	1.07444
Prdx6	5577.9	5827.5	5228.1	6547.8	6863.3	6081.3	1.17188	1.21306	1.1236
Qil1	429.6	428	332.9	455.9	458.1	481.1	1.17186	1.20121	1.06519
Timm13	991.6	918.9	852.8	1179.2	1113.9	945.1	1.17186	1.29429	1.28327
Kiaa0391	792.8	877.4	727.3	946.8	975.1	887.3	1.17172	1.19767	1.0791
Atp5a1	28142.2	29337.9	22519.6	29524.6	30327.9	33876.9	1.17162	1.15417	1.00636
Uckl1	2329.6	2265.4	1914.6	2404.4	2576.2	2645.9	1.17158	1.19153	1.06136
Smug1	52	54.4	52.8	62	63.5	61	1.17148	1.17071	1.13971
Pdha1	7219	7877.8	6681.9	8198	8151.9	9161.9	1.17141	1.12296	1.04065
Ccser2	424.2	389.5	277.5	389.4	401.8	487	1.17137	1.18621	0.999743
	1109.2	1085.5	867.4	1058.3	1173.2	1355.3	1.17135	1.14266	0.974942
Npr2	4813.5	4905.2	3638.9	4854.7	5460.8	5329.9	1.17127	1.20732	0.989705
Tmem67	378.8	387.1	347.1	414.4	414.3	474.9	1.17125	1.12871	1.07052
Emilin1	2396.9	2761.8	2748.3	3004.6	2839.8	3414.4	1.17096	1.06067	1.08791
Paox	951.7	971.6	792.5	998.2	931.7	1250	1.17089	1.09399	1.02738
Ppp3ca	2050.1	2137.7	1638	2289.3	2357.4	2174.1	1.17079	1.23069	1.07092
Ppox	1155.9	1298.7	960.8	1279.3	1346.7	1372.5	1.17073	1.1622	0.985062
Pdxp	319.1	327.9	292	366.6	406.2	326.5	1.17071	1.24665	1.11802
Nat6	182.4	202.5	165.5	221.6	231.2	191.5	1.1706	1.23043	1.09432
Hmbox1	90.5	106	117.7	121.6	117.7	128.5	1.17059	1.06974	1.14717
Adprh	5255.3	5241	3933.3	5683.4	5783	5420.2	1.17027	1.24984	1.08441
Mapk3	4235.6	4366	3881.5	4808	4896.1	4902	1.17007	1.17661	1.10124
Gpd1l	1379.3	1528.3	1312.9	1608.6	1514.2	1814.1	1.16974	1.09911	1.05254
Ebf3	849	875.5	950.4	880.9	801.7	1446.3	1.16973	0.921518	1.00617
Cecr5	777.9	818.3	719.3	851.5	868.2	988.8	1.16973	1.11843	1.04057
Lrsam1	1116.3	1199.1	984.8	1219.1	1190.8	1449.9	1.16957	1.10348	1.01668
Trim65	34	33.5	28.7	37.5	32.3	42.7	1.16944	1.12219	1.1194
Abhd17c	177.5	186.9	142.6	181.1	268.1	143.7	1.16943	1.36328	0.968967
Hvcn1	38.6	41.6	36.1	45.1	42.7	48.2	1.16939	1.12999	1.08413
Nipsnap1	1586.6	1753.1	1611	1930.4	1854.9	2002.7	1.16913	1.1252	1.10114
Tm9sf3	6007.3	6742.1	5748.1	7084.7	6588.5	7951.1	1.16904	1.09471	1.05082
Kiaa1432	631.2	641.1	569.8	667.5	734.4	751	1.16872	1.15773	1.04118
Hmgn2	787.2	878.9	741	769.9	777.6	1265.6	1.16867	0.955306	0.875981
Mcc	128.4	136.5	129.1	141	162	157.4	1.16853	1.14081	1.03297
Tmem230	1383.7	1406.8	1037.5	1510.4	1392.9	1569.1	1.16834	1.18778	1.07364
Casc4	1655.9	1794.1	1569.7	1861.2	1767.5	2235.4	1.16822	1.07875	1.0374
Tbck	1998.9	2019.7	1792.4	2122.8	2189.4	2476	1.16816	1.13119	1.05105
Tbc1d10b	906.1	1048.4	818.2	1020.8	1028.2	1189.9	1.16814	1.09772	0.973674
Ctdsp1	1201	1144.6	1010.2	1163.4	1208.7	1547.9	1.16813	1.10084	1.01642
Tpm3	3467.7	3450.2	2778.9	3501.7	3651	4174.3	1.16812	1.14827	1.01493
Slc44a1	1684.8	1860	1257.6	1860.2	1999	1750.4	1.16808	1.23788	1.00011
Nmnat3	223.8	243.4	184.1	265.6	244.7	250.4	1.16797	1.19368	1.09121
Txndc17	2115.5	2065.2	1714.6	2398.5	2165.9	2319.4	1.16768	1.20758	1.16139
Atp13a3	1964	1977.9	1551	1918.1	2251.8	2242.7	1.16743	1.18164	0.969766
Samm50	4804.9	4905.1	3638.5	5060.6	5195	5327.5	1.1674	1.20038	1.0317
Reep3	835.2	930.9	808	965.3	936.6	1103.1	1.1674	1.09374	1.03695
Sec22b	3961.6	4243.8	3487.4	4616.1	4517.4	4514.7	1.16723	1.18138	1.08773
Cdc26	37.2	31	22.1	32.8	36.6	36	1.16722	1.30697	1.05806
Usp40	1640.9	1705.5	1394.6	1729	1795.9	2008.5	1.16714	1.13703	1.01378
Uqcrb	2661.1	2720.3	2172.3	2953.1	2900.9	2960.7	1.16694	1.1965	1.08558
Immt	16558.3	17295.4	14658.7	18493.8	18607.8	19508.2	1.16691	1.16109	1.06929
Rabep1	3501.1	3356.3	2782.7	3559.5	3610.8	4078.5	1.16688	1.16799	1.06054
Cd302	159.2	191.4	151.6	198.8	164	223.2	1.16687	1.05773	1.03866
Ptprm	1794.5	1772.4	1426.5	1743.3	2019.1	2062.9	1.1666	1.17615	0.983582
Asl	5296.3	5636.8	4874.4	5946.3	6048.7	6444.4	1.1665	1.14116	1.05491
Pdgfrb	5293.6	5147.4	4410.1	5458.4	5817.8	6047.5	1.16649	1.17983	1.06042
Atp6v1d	3118.5	3182.2	2660.9	3504.4	3531.6	3416.7	1.16639	1.20416	1.10125
Il18	455.6	409.4	327.1	482.9	419.9	487.6	1.16635	1.2258	1.17953
Cemip	1501.8	1756.6	976.9	1425.2	2523.9	990.6	1.16632	1.4447	0.81134
Scarf2	1443.2	1698	1181.1	1644.3	1474.8	1920.9	1.16605	1.08336	0.968375
Plod2	8048.2	9185.8	7676.8	9514.4	9106.8	10424	1.16597	1.10429	1.03577
Fchsd1	651.6	806	755.2	875.8	911.8	792.3	1.1659	1.14502	1.0866
Gas2	1688.9	1709.2	1876.9	1892.1	1233.3	3024.3	1.16582	0.871532	1.10701
Rasa3	3566.2	4121.3	2981.2	4038.3	4384.8	4014	1.16576	1.18593	0.979861
Mboat7	799.4	940.7	764.8	911.8	927.9	1079.9	1.16556	1.07869	0.969278
Cpped1	2746.2	2807.6	1957.9	2935.7	3009.4	2810	1.16553	1.24753	1.04563
Chrnb3	36.1	33.4	32.6	43.3	36.7	39	1.16552	1.21212	1.29641
Iba57	403.9	376.5	292.9	419.3	431.2	400.4	1.16547	1.27054	1.11368
Mtnd4	1626.9	1662.7	1278.6	1765.1	1747	1811.9	1.16545	1.19406	1.06159
Git2	233	235.2	175.6	225.7	220.8	303.7	1.16527	1.0869	0.959609
Fbxl20	1160.7	1322.5	972.9	1256.7	1320.8	1449.5	1.16519	1.1229	0.950246
Ppp3cb	2454.6	2661.4	2191.3	2856.7	2826.2	2831.3	1.16516	1.17108	1.07338
Pigg	1453.4	1490.5	1234.4	1591.7	1664.1	1612.6	1.16516	1.19483	1.0679
Dhodh	1203.1	1192	965.7	1212.2	1230	1473.6	1.16514	1.13185	1.01695
Rnf34	153.3	158.8	127.6	164.5	151.2	196.6	1.16511	1.1023	1.03589
Ntpcr	707.8	751.2	525.4	731.3	731.6	848.9	1.16499	1.14593	0.973509
Ccdc90b	1528.9	1263.7	1214.1	1383.6	1519.2	1764.1	1.16477	1.17152	1.09488
Csf1	185.9	217.3	103	208	263.4	118.2	1.16476	1.47175	0.957202
Osbpl5	1759.3	1809.5	1480.9	1898.8	1934.4	2047.6	1.16458	1.16496	1.04935
Thyn1	1775.8	2004.7	1570.9	2054.2	1987.3	2190.1	1.16448	1.1303	1.02469
Uqcr10	390.1	420.4	324.8	456.4	402.8	462.7	1.16436	1.15298	1.08563
Dpy19l1	773.7	886.6	848.8	845.3	1061	1015	1.16428	1.09848	0.953418
Pde4a	439.5	446.7	372.4	456.7	439.6	569	1.16423	1.09425	1.02239
Fam96b	405.7	244.3	148.9	267.2	433.9	229	1.16423	1.78306	1.09374
P33monox	799.1	819.3	597.1	850.8	825.2	902.8	1.16398	1.18328	1.03845
2410002F23Rik	57.6	45.5	42.7	47.9	64.9	56.9	1.16392	1.27891	1.05275
Kctd7	190.9	194.1	133.1	179.7	179.1	244.2	1.16387	1.09658	0.925811
Agtrap	239.4	230.6	159.3	241.1	217.5	273.8	1.16383	1.1762	1.04553
Serpine2	2908.6	2527.5	1763.1	2926.9	2873.5	2578	1.1638	1.35189	1.15802
Col9a1	435.5	467.6	382.8	518.8	428.7	549	1.16378	1.11418	1.1095
Prorsd1	1571.9	1362.7	1210.1	1639.9	1511.3	1672.2	1.16375	1.22481	1.20342
Flnb	122117	125287	97938.1	132476	131446	137959	1.16372	1.18231	1.05738
Arpp19	2110.6	2293.8	1885.6	2782.7	2842	1693.8	1.16351	1.34582	1.21314
Stat6	2639.2	2818.9	2622.4	2940.1	3019.7	3441.9	1.1635	1.09529	1.043
Pusl1	234.9	271	251.3	249.3	264.6	367.1	1.1635	0.983917	0.919926
Dock6	35.2	47.2	48.6	49.6	43.1	59.7	1.16336	0.967641	1.05085
Tatdn1	1280.4	1341.8	1130.7	1416.7	1399	1550.1	1.16331	1.13881	1.05582
Pam	2214.6	2240.3	1812.6	2269.8	2626	2395	1.16327	1.20797	1.01317
Appl1	2685.8	2883.8	2794.8	2852.2	2796	4081.8	1.16326	0.994647	0.989042
Ndufb7	1823	2212	1869.3	2598.5	2105.7	2163.8	1.16322	1.15262	1.17473
Tmem87b	431.2	458.5	403.4	456.5	409.7	637.9	1.16317	1.00499	0.995638
Fibp	1207.2	1263.7	1423	1374.8	1454	1699.4	1.1629	1.05289	1.08792
	1218.8	1280.4	1088.7	1367.4	1307.4	1497.2	1.1628	1.12904	1.06795
Erh	1552.1	1195.9	1129.2	1361.6	1840.2	1306.2	1.16269	1.37706	1.13856
Prrx2	437.4	430.9	424.5	458.9	468.8	575.4	1.16267	1.08452	1.06498
Bcs1l	1333	1337.2	931.1	1315.2	1318.3	1552.7	1.16241	1.161	0.983548
Gng12	2826.3	3069.8	2463.4	3141.6	3748.8	2826.3	1.16235	1.24528	1.02339
Extl3	900.9	1034.2	690.6	1000.9	1152.8	898	1.16224	1.24867	0.967801
Tmem138	187.9	212.6	195.4	210.2	248.2	234.1	1.16211	1.12353	0.988711
Sbf2	770.4	792.2	701.2	766.4	808.7	1055.6	1.16207	1.05471	0.967432
Gtf2a1	173.5	219.9	210.1	229	222.5	249.8	1.16205	1.05	1.04138
Ppp2r4	3719.4	3677.7	2988.8	3979.6	3787.6	4299.6	1.16184	1.16511	1.08209
Osbpl8	2014.4	2173.5	1800.3	2275.8	2230	2451.4	1.16182	1.13388	1.04707
Plcg2	2366.8	2686.5	2150.8	2735.2	2725.5	2908.7	1.16176	1.12887	1.01813
Phlda3	1375.1	1474.2	1203.3	1395	1610.5	1702.2	1.16165	1.1225	0.946276
Aldh2	12335.4	13130.4	11958.8	14655.8	13950.4	14866.3	1.1616	1.14018	1.11617
Asap1	5910.9	5989	4878.4	6338	6184.5	6966.4	1.16155	1.1523	1.05827
Dtnbp1	412.4	421.6	352.2	461	463.7	453	1.16144	1.19501	1.09345
Pcmtd2	591	592.5	458.1	590	600.9	715.7	1.16143	1.13354	0.995781
Sphk2	537.3	643.1	496.6	634.7	668.4	644.6	1.16142	1.14337	0.986938
Abi3bp	2939.8	2780.7	1598.4	2950.3	2857.7	2692.2	1.1614	1.3263	1.06099
Pdcd6	2627.2	2655.1	3165.4	3203.4	3102.5	3504.2	1.16127	1.08339	1.20651
Add1	3594.9	3758.1	3241.1	3588.1	4168.7	4545.5	1.16124	1.10824	0.954764
Lta4h	12685.7	13133.5	12049.6	14658.8	13351.6	15964.1	1.16123	1.11227	1.11614
Galnt13	71.7	71.8	44.5	62.9	83.2	72.2	1.16117	1.25623	0.876045
Ptx3	1664.8	2839.1	1928	2478.8	3506.9	1482.5	1.16112	1.25563	0.873094
Rbms1	41.1	43.6	32.8	48.1	43.3	45	1.16085	1.19634	1.10321
Alkbh6	137.1	122.1	81.7	125.6	127.6	142.5	1.16075	1.24239	1.02867
Mt-Cyb	101.3	112.8	90.5	110.2	120.5	122.8	1.16054	1.13478	0.97695
Snx2	6938.1	6884.5	5267.1	7332.8	7276.5	7542.7	1.16042	1.20225	1.06512
Sh3bp5l	62.6	60.4	58.5	61.5	62.8	86.3	1.16033	1.04542	1.01821
H2-K1	431.2	452.8	164.7	510.5	541.4	164.9	1.16029	1.70348	1.12743
Rgp1	112	108.8	95	122.8	124.5	119.1	1.16023	1.21344	1.12868
Ndufb6	663	688.6	466.2	689.4	716.5	703	1.16014	1.21744	1.00116
Atp5i	3017.4	3227.7	2636.7	3452.1	3401.1	3450.6	1.1601	1.16861	1.06952
Myl6b	292.4	277.9	201.9	310.2	315.5	270.1	1.16006	1.30409	1.11623
Mon1b	246.6	271.3	200.8	267.9	291	274.8	1.16001	1.18386	0.987468
Ndufb9	1796.3	2076.4	1692.8	2223.3	2080.1	2152.1	1.15991	1.14173	1.07075
Dpp8	2682.3	2840.3	2419.4	2933.4	2987	3290.1	1.15972	1.12562	1.03278
Hsdl2	1429.5	1481	1151	1565.3	1511	1633.5	1.15962	1.16881	1.05692
Abi3bp	407.9	367.5	185.5	398.5	410.6	305	1.15943	1.46311	1.08435
Marcksl1	795.8	838.3	694.5	841.2	881.7	976.8	1.15937	1.12402	1.00346
Nudt15	132	108.3	72	109.9	123.1	129	1.15914	1.29229	1.01477
Dlg3	729.9	800.9	607.7	804	837.3	837.5	1.15913	1.1652	1.00387
Cmtm4	108.8	99.4	84.7	108.1	107	124.4	1.1591	1.16839	1.08753
Mcu	3251.7	3245.5	3026.8	3385.2	3441.5	4211.1	1.15895	1.08839	1.04304
Actbl2	623.8	584.9	382.3	612.9	623.7	607.1	1.15883	1.27854	1.04787
Lpar1	303.1	295.7	210.1	264.4	340.8	332.1	1.15873	1.19652	0.894149
Fam89b	247.2	179.8	178.7	230.9	174.7	296.2	1.15866	1.13138	1.2842
Wdr13	243.6	257.7	220.5	271.8	275	289.5	1.15863	1.14345	1.05471
Bace1	324.1	279.8	187.7	304	245.2	367.7	1.15829	1.17476	1.08649
Kdm5b	105.8	73.4	53.3	63.7	57.2	148.4	1.15828	0.954223	0.867847
Ppp1r12c	954	981.1	778.3	970	1003.7	1169.1	1.15825	1.1218	0.988686
Nxn	3078.2	3200.9	2590.6	3461.8	3089.6	3721	1.15815	1.13121	1.08151
Lonp1	9492.3	10123.5	7516.4	10365.2	10027.4	11029.2	1.1581	1.15605	1.02388
Pex11g	136.7	151.4	125.8	156.4	171.6	151.3	1.15801	1.18326	1.03303
Ensa	846.5	752.9	708.2	843.5	1040	788.4	1.15787	1.2891	1.12033
Cpd	3835.2	4164.2	3385	4360.5	4566.8	4252.5	1.15771	1.18255	1.04714
Atp2b4	2116.9	2425.4	1975.8	2343.1	2315.2	2887.4	1.15765	1.05842	0.966067
Vav2	441.7	503.3	446.8	549.5	504.1	557.6	1.15764	1.10894	1.09179
Nagpa	364.2	344.9	304.9	391.8	349.6	432	1.1572	1.14097	1.13598
Ssbp1	3323.9	3237	2573.5	3389.2	3317.3	3863.1	1.15712	1.1542	1.04702
Grk5	234.3	230.6	229.1	254.5	273.2	275.2	1.15692	1.14792	1.10364
Nt5dc3	1799.2	1781.6	1564.8	1802.3	1864.6	2285.8	1.15685	1.09577	1.01162
Aspn	1797.1	1384	1529.7	1646.6	1059.9	2743.1	1.15683	0.928888	1.18974
Ephb6	204.9	216.1	184.4	214.4	226.6	259.2	1.15659	1.10112	0.992133
Frmd5	522.2	502.3	369.2	539.3	535.4	537.2	1.15656	1.23316	1.07366
Smpd1	848.5	904.4	775.9	948.7	999.8	976.2	1.15656	1.15961	1.04898
Fbxw9	207.8	224.7	181.5	233.4	228.5	248.2	1.15651	1.13712	1.03872
Nfs1	3133.8	3260.1	2470.3	3262.9	3351.8	3636.3	1.15645	1.15432	1.00086
Pnp	11726.7	11784.1	7678.9	13176.7	14010.1	8878.6	1.15632	1.39685	1.11818
Phyh	510.6	491.2	435.1	508.3	624.4	528.8	1.15631	1.22282	1.03481
Fahd2	1032	1010.5	707.1	1080.8	1129.9	968.5	1.15624	1.28709	1.06957
Ndufb11	1658.4	1412.4	1214	1459	1777.2	1717.9	1.1562	1.23218	1.03299
Fh	10295.6	10548.1	8960.6	11282.3	10983	12194.3	1.1562	1.1413	1.0696
Rab22a	1692.4	1672.3	1588.1	1816.6	1891.8	2017.8	1.15615	1.13741	1.08629
Rab5b	2571.8	2679.6	2193	2603.5	2715.6	3287.6	1.15613	1.09163	0.9716
Trmu	2315	2578.2	2060.1	2552.2	2637	2847.9	1.15587	1.11877	0.989915
Dtna	35.1	34.8	18	33.7	36.7	31.2	1.15586	1.33333	0.968391
Vamp4	89.4	92	70.8	88	102.8	100.7	1.15583	1.17199	0.956522
Ssr4	2142	2214.7	1763.3	2438.4	2369.7	2264.5	1.15565	1.20867	1.10101
Casp4	43.6	98.5	34	89.9	90.1	23.5	1.15559	1.35849	0.91269
Bcl2l2	136.2	125.1	103.2	138.7	157.6	124.9	1.15556	1.29785	1.10871
Slc12a7	5831.7	5160.2	3691.7	5768.7	5261.2	5937.7	1.15555	1.24605	1.11792
Sav1	1561.4	1696.6	1236.7	1743.4	1833.3	1617	1.15552	1.21934	1.02758
Lpcat3	2658.4	2834.8	2380.2	2900.1	2908.3	3288.9	1.15545	1.11379	1.02304
Stoml1	68.9	76.7	55.2	66.9	69.4	95.7	1.15538	1.03336	0.872229
Mtnd5	1027.6	1003.9	825.8	1016.3	1144.2	1140.5	1.15529	1.18079	1.01235
Ppp2r5a	2933.5	3011.2	2700.6	3038	3137.7	3811.8	1.15525	1.08122	1.0089
Ryr1	166.6	153.5	109.2	155.3	178.8	161.8	1.15514	1.27179	1.01173
Map1a	10565.4	11265.9	8730.5	11466.1	12025.9	11807.9	1.15503	1.17481	1.01777
Acaa1a	2297.8	2427.6	1583.2	2460.4	2545.8	2279	1.1548	1.24818	1.01351
Zfp869	41.4	51.1	49	49.5	51.3	62.6	1.15477	1.00699	0.968689
Eri3	1302.8	1377.5	1133.5	1463.5	1290.2	1650.2	1.15473	1.09665	1.06243
Mid2	266	278.9	261.8	307.9	304.1	319.5	1.1547	1.13187	1.10398
Ddb2	50.9	59.5	56	62.1	66.9	63.1	1.15445	1.11688	1.0437
Ccdc22	2272.3	2369.1	2062.5	2564.9	2516.5	2657.8	1.15443	1.14663	1.08265
Suco	246	275.2	286.8	330.7	327.6	274.4	1.15433	1.17135	1.20167
Plekha2	232.3	287.2	228.9	270.9	314.1	278.8	1.1542	1.1335	0.943245
Ppp1r12a	9091.9	9385.6	7441.2	9873.8	9232.6	10805.5	1.15407	1.13547	1.05202
Aldh5a1	1989.3	2135.2	1715.4	2249.8	2159.7	2329.6	1.15398	1.14515	1.05367
Fabp5	3393.1	3850.8	3713.7	4428.9	3655.9	4559.1	1.15389	1.06878	1.15012
Plod1	8285.2	9581.7	8319.7	9969.2	9700.5	10546.4	1.15388	1.09878	1.04044
Fam208b	104.7	94	71.1	99.8	105.9	105.6	1.15382	1.24591	1.0617
Slc25a4	18938.9	20008.2	16481.4	20865.6	21457.4	21630.4	1.1538	1.15986	1.04285
Dusp16	197.5	210.1	187	205.9	244.4	235.7	1.15372	1.13397	0.98001
Tyk2	136.8	147.9	133	141.4	158.4	182.1	1.1537	1.06728	0.956051
Enah	2901.9	3137.3	2318.4	3204.7	3438.5	2998.5	1.15364	1.21766	1.02148
Gcsh	893	970.1	766.9	989.1	933.3	1111.4	1.15354	1.10674	1.01959
Ece1	1460.4	1601.5	1563.2	1608.2	1943.2	1783.8	1.15353	1.12219	1.00418
Arhgap44	277.3	239.2	114.7	250.3	277.2	200.6	1.15352	1.49053	1.0464
Atp6v1g1	408	457.8	357.4	489.3	480.5	441	1.15337	1.18965	1.06881
Pdia4	38840.5	41400.6	34121.8	43276.7	40000.1	48616.2	1.15328	1.10268	1.04532
Lsm1	728.1	733.4	625.7	813.1	810.5	783.3	1.15317	1.19461	1.10867
Arrb1	883.4	976.7	779.5	967.1	1086.3	990.5	1.15317	1.16923	0.990171
Crtc3	321.3	322	303.2	325.5	342.2	423.7	1.15309	1.06798	1.01087
Bloc1s1	576.5	610.6	460	673.6	607.3	618.3	1.15306	1.19643	1.10318
Fbxw17	803.4	762.5	558	790.7	821.8	836	1.15283	1.22113	1.03698
Stx4	1565.4	1610.8	1370.9	1692.3	1665.5	1884	1.15278	1.12614	1.0506
Strada	853.2	968	891.7	982.1	1171.3	973.8	1.15271	1.15793	1.01457
Cdc42ep5	472.4	516.6	408.1	518.2	552.1	539.9	1.15253	1.15746	1.0031
Ralgapb	2929.7	3020.1	2520.2	3195.3	3271.4	3294.8	1.15248	1.16721	1.05801
Pgls	3092.5	2632.6	2384.7	3098.1	3280.2	2967.2	1.15237	1.27126	1.17682
Commd2	798	824.5	763.2	904.2	970.4	874.6	1.15237	1.1807	1.09666
Dpm1	2457.2	2634.4	1955.5	2655.4	2745	2720.1	1.15232	1.17658	1.00797
Efcab14	167.4	170.8	165.4	186.1	179.6	214.5	1.1521	1.08775	1.08958
Pter	1385	1417.1	1208.2	1503.8	1498.3	1617.6	1.15196	1.14353	1.06118
Rab13	534.1	503.7	384.8	528.3	499.2	611.2	1.1519	1.15644	1.04884
Nudt4	581.9	572.7	391.1	650.6	609.9	519.9	1.15184	1.30784	1.13602
Stk11	785.1	833.9	727.6	873.9	959.7	868.9	1.15167	1.17426	1.04797
Csnk1g2	746.8	722.1	515	696.6	806.5	781.6	1.15162	1.21502	0.964686
Ap4s1	210.5	225.6	239.3	252.3	251.1	274.4	1.15161	1.08281	1.11835
Ubp1	1551.1	1675.2	1365.1	1729.4	1611.4	1946.7	1.15161	1.09884	1.03235
Arhgap6	292	258.7	181.6	278.4	301.9	263	1.15158	1.31797	1.07615
Pi4k2a	2373.5	2408.9	1855.1	2532.8	2550.1	2560.6	1.15156	1.19205	1.05143
Lpp	58.4	56.6	48.7	62.8	65.8	59.9	1.1515	1.22127	1.10954
Spryd4	1545.7	1641	1272.9	1754.4	1748.8	1631.9	1.15147	1.20224	1.0691
Dvl3	469.7	439.9	389.6	497	465.6	533.2	1.15132	1.16046	1.1298
Slc9a3r2	830.8	864.3	803.8	895.2	904.9	1076.9	1.15131	1.07913	1.03575
Prkag1	4588.2	4582.6	4172.6	5072.1	4885.6	5404.1	1.15127	1.13735	1.10682
Nck1	2668.3	2792.8	2277.7	2895.6	2811.9	3201.8	1.15125	1.12563	1.03681
Asrgl1	5406.8	5497.7	4271.6	5884.3	5727.7	5859.3	1.15124	1.18862	1.07032
Cdk5	1898.8	2057.4	1805.9	2259.9	2190.4	2182.9	1.15118	1.15194	1.09843
Cstb	3810.9	3992.7	3869.7	4782.4	4554.8	4100.5	1.15115	1.18758	1.19779
Adprhl2	589.5	601	520.6	645.7	615.8	708.2	1.15113	1.12473	1.07438
Fxn	339.2	286.9	279.5	353.4	387.9	301.1	1.15106	1.30879	1.23179
Tom1l2	3344.2	3449.5	2738.4	3464.3	3742.4	3764.7	1.151	1.16464	1.00429
Opa1	7665.9	8626	7778.9	8987.2	9289.8	9426.4	1.15091	1.11412	1.04187
Man1a2	2769.1	2944.1	2554.3	2993.7	3020.7	3500.1	1.15083	1.09385	1.01685
2015-09-07	12691.5	13326.5	11770.5	14020.6	13746.7	15719.8	1.1508	1.1064	1.05208
Scrn3	1090.8	1145.8	841.3	1160.8	1068.5	1312.7	1.15078	1.12189	1.01309
Cdc42bpa	7606	8025.2	6730.2	8156.7	8469.8	9099.8	1.15048	1.12681	1.01639
Rala	3564.7	3907.8	3696.7	4146.6	4377.3	4325.2	1.1504	1.1209	1.06111
Actn1	352.6	457.5	334.2	460.6	468.6	387.2	1.1504	1.17368	1.00678
Atp5c1	8042.6	8720.5	6860	8912.6	8643.5	9618.1	1.15032	1.1268	1.02203
Inpp5f	265.5	296.5	235.1	274.7	314.4	327.8	1.15029	1.10816	0.926476
Pikfyve	54.2	53.7	39.6	54.5	59.9	55.2	1.14983	1.22615	1.0149
Ppp3r1	2589.2	2374.8	1758.8	2641.2	2691.7	2396.3	1.1497	1.29013	1.11218
Fbxl7	43.5	52.8	40.7	50.4	46.4	60.7	1.14964	1.03529	0.954545
Cyc1	1362.8	1435.7	1153.2	1490.5	1477.2	1575.1	1.14958	1.14632	1.03817
Jak2	563.5	665.7	603.2	640.6	765.5	700.1	1.14942	1.10813	0.962295
Atp6v0c	439.4	427	335.8	452.9	439.9	489	1.14939	1.17042	1.06066
Trappc2	110.7	132.9	89.2	124.3	144.2	114	1.14934	1.20891	0.93529
Cdc23	3842.3	4079.6	3793.7	4173.3	4142.3	5147	1.14912	1.05618	1.02297
Ndufs2	5925.9	6049.8	4993.3	6478	6622.7	6397.1	1.14902	1.18632	1.07078
Slc4a4	1036.2	1000.2	1147.2	1172.2	987.2	1498.5	1.14898	1.00559	1.17197
Fam86a	261.2	273.2	281.2	300.2	307.3	329.6	1.14897	1.09578	1.09883
Trappc6b	1241.4	1244.5	1024.3	1293.3	1341.2	1398.6	1.14897	1.16119	1.03921
Synpo	4754.5	5298.7	4165.5	5388.4	5851.5	5095.8	1.14889	1.18762	1.01693
Tomm40l	495.8	554.2	438.8	576.6	556	577.8	1.14884	1.14058	1.04042
Atat1	759.6	799.6	608.3	731.3	861.4	897.4	1.14884	1.13126	0.914582
	690.7	749.7	644.6	803.3	832.1	759.8	1.14878	1.17292	1.0715
Myl12a	5043.3	6255.8	6190.1	7436.5	6803.2	5848	1.14858	1.14413	1.18874
Msi2	2018.1	2118.6	1608.7	2199.4	2022.7	2376.7	1.14854	1.13275	1.03814
FRRS1	1076.5	1121.4	983.4	1185.9	1199.1	1268.8	1.14852	1.13312	1.05752
Myl6	5275	5669.3	4670.4	6370.1	5686.4	5876.8	1.14849	1.16604	1.12361
Ocrl	1769.8	1766.2	1580.2	1820.8	1892.1	2162.7	1.14843	1.10952	1.03091
Bag5	2553.3	2634.6	2306	2664.9	2543.2	3398.1	1.14843	1.05414	1.0115
Ehd2	11420.9	12597.2	11309.3	13006.4	13587.3	13970.6	1.14824	1.1124	1.03248
Col6a2	3395.9	3952.1	3957.3	4062.9	2838.3	6078.7	1.14813	0.872531	1.02804
Atf7	314.7	337.2	329.3	378.4	307.3	440.7	1.14798	1.02881	1.12218
Fam173a	217.4	217.1	128.6	203.9	247.1	195.4	1.14793	1.3046	0.939199
Trappc1	1302.8	1305.8	1097	1388.2	1429.8	1435.5	1.14786	1.1728	1.0631
Chpt1	83.8	92.3	70.1	96.2	98	88.4	1.14785	1.19581	1.04225
Bcas3	889.6	1018.5	859.3	996.5	1105.4	1074.4	1.14776	1.11934	0.9784
Cdc42bpb	6643.6	7174.1	5906.5	7241.3	7444.8	7952.2	1.14774	1.12274	1.00937
Tmem66	814.8	885.8	712.2	954.6	954.2	860.4	1.14771	1.19449	1.07767
Plekhm1	110.5	116.5	111.7	132.9	140.7	115.1	1.14762	1.19895	1.14077
Tgfbrap1	701.5	678	595.7	726	753.8	786.9	1.14758	1.16181	1.0708
Mcat	1411	1537.8	1257.4	1539.8	1597.7	1689.1	1.1475	1.12246	1.0013
Ndufaf5	1005.5	1060.1	900.3	1112.2	1098.1	1192.4	1.14727	1.12747	1.04915
Bet1	657.7	681.4	583.5	758.1	685.9	761.6	1.1472	1.14159	1.11256
Vipas39	1655.2	1777.1	1491.4	1862.8	1890.3	1895.3	1.14719	1.14826	1.04822
Nkx3-2	302.3	322	289.3	336.6	280.7	430.7	1.14711	1.00982	1.04534
Rilpl1	1245.7	1172	836.6	1190.3	1245.4	1296.7	1.14691	1.21264	1.01561
Bles03	2125.3	2299.4	2013.7	2350.2	2314.5	2718.9	1.14681	1.08152	1.02209
Pycr2	3677.1	3820.8	3307.8	4115.9	4037.4	4238.4	1.14677	1.14374	1.07724
	39.2	43.5	47.6	52.4	45.9	51.1	1.14658	1.07903	1.2046
Cdkn1b	556.8	544.3	518.9	582.5	598.7	675.9	1.14636	1.11099	1.07018
Tmem260	751.7	852.1	655.1	870.7	937.3	781.5	1.14635	1.19958	1.02183
Myo1c	138.7	148	139	145.1	179.8	163.1	1.14635	1.13206	0.980405
Tmed3	3220.2	3551.5	2766.3	3498.1	3323.7	4109.9	1.14612	1.07977	0.984964
Smdt1	147	139.9	97.8	145.2	141.8	153.9	1.14609	1.2074	1.03788
Inpp1	3137.1	3121.1	2291.9	3361	3289.2	3148.2	1.146	1.22856	1.07686
Wdr20	63.7	67.8	61	63.3	77.9	79.4	1.14597	1.09627	0.933628
Kat5	35.5	44.7	35.6	47.2	40.9	44.6	1.14594	1.09714	1.05593
Tefm	476.6	530	355.7	506.2	513.4	541.5	1.14593	1.15118	0.955094
Fam213a	587.2	522.6	449.9	582.1	634.6	570.6	1.14593	1.25111	1.11385
Vdac2	13786	13898.6	10497.3	15137.3	14140.6	14464.7	1.14564	1.20012	1.08912
Nudt2	2363.8	2487.5	2192.5	2700.9	2653.9	2714	1.14552	1.14419	1.08579
Ror1	278.7	297.4	225.6	293.4	300.3	324.6	1.14544	1.13518	0.98655
Igfn1	43	49.6	46.3	56.8	43.3	59	1.14543	1.0438	1.14516
Mycbp	252.4	160.2	108.8	161.1	251.5	184.6	1.14538	1.53383	1.00562
Trim2	948.1	961.3	855.9	955	978.5	1233.8	1.14537	1.064	0.993446
Scamp1	1798.3	2060.2	1940.7	2145.7	2464	2032.2	1.14531	1.15217	1.0415
Srd5a3	181.5	210.4	165.5	200.3	215.4	222.6	1.14514	1.10588	0.951996
Capn1	7997.1	8425.8	7191.4	8660.8	8498.7	9880.9	1.14509	1.09876	1.02789
Mterfd2	42.3	55.2	55.6	61.2	56.9	57.2	1.145	1.06588	1.1087
Pard3b	722	730.3	622.1	779.7	881.7	713.7	1.14496	1.22848	1.06764
Ppapdc2	104.3	109.6	102.8	111.5	131.4	119.7	1.14493	1.1436	1.01734
Nf1	5159.9	5509.8	4661.6	5598.9	5946.6	6007.3	1.1449	1.13509	1.01617
H2afy	5201.4	5735.4	4678	5719.8	5600.6	6556.8	1.14489	1.0871	0.99728
Mppe1	264.4	268.4	274.5	313	312.7	298.4	1.14468	1.15251	1.16617
Col1a2	10234.3	12026.1	14383.3	11091.6	9252.5	21601	1.14467	0.770336	0.922294
Mipep	2089.8	2234.2	1846.1	2181.6	2321.8	2559	1.14462	1.10369	0.976457
Dmwd	228	294	274.2	332	310.9	268.4	1.14456	1.13147	1.12925
Zdhhc17	717.3	804.2	744.9	799.4	854	940.5	1.1445	1.06733	0.994031
Mtmr1	1357.9	1394.2	1266	1526.8	1508.1	1563.6	1.14445	1.14085	1.09511
Slc1a5	680.2	742.6	717.9	731.2	754.1	964.4	1.14435	1.01698	0.984649
Cox5b	650.6	571.7	411	668.3	671.7	528.9	1.14425	1.36359	1.16897
Uba5	1900.7	1893.2	1618.3	2063.7	2009.5	2119.6	1.14423	1.15996	1.09006
Srgap1	865.2	851.3	623.4	852.4	952.3	872.6	1.14419	1.22377	1.00129
Snx8	1662.2	1716	1585.2	1851	1463.4	2364.3	1.14411	1.004	1.07867
Sfxn2	299.8	331.6	249.6	324.3	338.4	345	1.14381	1.14023	0.977986
No66	1014.9	1119.9	1044	1177.5	1205.1	1253.2	1.14376	1.10107	1.05143
Def8	284	354.1	324.3	352.2	365	383.5	1.1437	1.05719	0.994634
Rhoj	142.7	152.8	135.4	156.2	165.2	171.4	1.14365	1.1152	1.02225
Dvl1	2120.5	2084.6	1613.8	2143.4	2158.4	2352.9	1.14364	1.16315	1.02821
Ndufs4	1780.1	1952.2	1623.9	1986.2	1979.6	2159.7	1.14363	1.10897	1.01742
Dag1	3344.3	3516.7	3481.4	3831.8	3838.8	4156.9	1.14359	1.0961	1.0896
Mmp15	281.1	302.4	242	347.6	280.8	315.6	1.14355	1.1543	1.14947
Vps11	2886.3	3154.3	2828.1	3334.5	3546.8	3260.1	1.1435	1.15026	1.05713
Eml1	1680.4	1783.6	1543.5	1881.5	1680.8	2163.5	1.14344	1.07069	1.05489
Ccdc51	895	947	753.2	1016.6	1014.1	936.7	1.14342	1.19439	1.0735
Srsf4	917.1	970	924.4	1051.9	1028.2	1134.5	1.14338	1.09803	1.08443
Tamm41	1093	1230.6	1084.1	1246.7	1210.9	1438.6	1.14335	1.06174	1.01308
Bag1	2582.1	2701.2	2330.3	2986.1	2664.9	3053.1	1.14323	1.12312	1.10547
Dscr3	1121.6	1235	1118	1283.2	1282.9	1406.1	1.14321	1.09057	1.03903
Tctex1d2	74.5	80.7	62.8	80.5	84.7	84	1.14312	1.15122	0.997522
B4galnt1	256.9	312.9	245.4	321.7	296.2	313.9	1.14303	1.10675	1.02812
Abca7	219.1	246.8	223.3	262	260.9	264.8	1.14292	1.11232	1.06159
Gdpgp1	288.5	286	242.3	315.9	342.8	274.8	1.14287	1.24683	1.10455
Dhx57	1637.4	1969.3	1773.5	1971.7	1852.1	2323.9	1.14265	1.02164	1.00122
Lrp1	32074.5	36797	33968.6	37986.8	34094.5	45424.1	1.1426	1.01859	1.03233
Lars2	1163.6	1276.2	1110.4	1248.3	1377.9	1429.8	1.14247	1.10039	0.978138
Ces2g	1775.9	1845.8	1359.3	1816.3	2144.4	1728.9	1.14226	1.23575	0.984018
Asph	10134.2	10528.5	7460.5	11260.8	9977.5	10880.4	1.14207	1.18063	1.06955
Csk	5137.6	5444.4	4955.7	5658	5501.3	6585.2	1.14203	1.073	1.03923
Ndufs5	1341.1	1497.9	1110.1	1513.4	1482.7	1513.5	1.14193	1.14881	1.01035
Slc37a4	92.5	84.6	76	96.2	113	79.8	1.14184	1.30262	1.13712
Mif4gd	323.7	365.9	345.5	365.2	371	445.7	1.14182	1.03486	0.998087
Vat1	12234.9	12903.7	10475.5	13969	13227.3	13462.3	1.14164	1.16327	1.08256
Axin1	472.4	545.1	465.9	559.8	594.2	539.4	1.14157	1.14144	1.02697
Tmem101	118.9	122.6	117.4	120.5	143	146.2	1.14154	1.09792	0.982871
Ank2	1656	1754.7	1422.9	1767.5	1928.8	1821	1.14145	1.16324	1.00729
Aldh1l2	15340.3	15862.5	12279.6	16828.1	13988.9	18815.1	1.14143	1.09505	1.06087
Ccar2	3881.1	4468.4	4258.7	4426.4	4357.4	5603.9	1.14114	1.0065	0.990601
Svep1	6488.7	7454.7	5100.9	6794.5	8025.3	6911.5	1.14109	1.18033	0.911438
Ssh3	1004.8	1077.6	924.3	1098.5	1187.1	1145.3	1.14108	1.14172	1.01939
Emc6	205.5	227.2	219.4	242.7	260.9	240.5	1.14108	1.12763	1.06822
Krtcap2	748.4	842.5	690.6	895.8	854.7	852.7	1.141	1.1418	1.06326
Pex19	441.1	535.8	468.5	620	546.3	482.9	1.141	1.16131	1.15715
Osgep	1583	1662.3	1454.8	1829.5	1729.5	1803.8	1.141	1.14177	1.10058
Cadm4	252.8	255.3	262.3	273.3	317.4	288.1	1.14071	1.14123	1.07051
Aifm1	8435.3	9203.7	7728.2	9365.7	9305	10264.1	1.14064	1.10269	1.0176
Tpm3	12156.2	9921.9	8125.3	10749.4	12286.1	11407.2	1.14036	1.2764	1.0834
Alg6	154.5	170.9	143.4	168.3	188.5	177.8	1.14036	1.13522	0.984786
Ift88	451	489.9	424.2	503.6	500.9	552.2	1.14036	1.0989	1.02796
Sh3bp1	394.7	428.5	325.5	427.2	436.3	446.4	1.14033	1.14523	0.996966
Scarb2	5296.2	4880	3576.2	6052.6	4712.6	4917	1.14032	1.27305	1.24029
Tmem53	489.1	481.6	363	517.9	479.1	523.8	1.14029	1.18044	1.07537
Ttc17	451.8	529	400.2	552.1	527.6	494.8	1.14012	1.16197	1.04367
Arhgef6	1030.6	1116.7	821.2	1125.6	1037.3	1221.4	1.14007	1.11611	1.00797
Mtfr1l	1107.5	1212.1	998.3	1332.1	1205.9	1244.6	1.14006	1.14821	1.099
Tmlhe	2062.8	2215	1914	2329.9	2338.4	2390.5	1.14002	1.13061	1.05187
Commd10	2246.5	2300	2113.2	2565.7	2438.2	2587.7	1.13993	1.13385	1.11552
Cc2d2a	54.1	66.4	54.6	61.5	57.1	81	1.13992	0.980165	0.926205
Pkm	2420.9	2743	1877.5	2852.6	3728.8	1443.8	1.13972	1.42439	1.03996
Pcolce	2955.8	3460	3619.3	3251.6	2698.1	5486.5	1.13962	0.840436	0.939769
Ehbp1	10742.8	9955.3	7055.7	9876.9	11434.8	10316.2	1.13959	1.25282	0.992125
	103.8	113.6	135.8	137.2	141.3	124	1.13958	1.11668	1.20775
0610009B22Rik	218.2	216	174	234.7	250	208.3	1.13943	1.24282	1.08657
Pgs1	1339.4	1415.9	1062.6	1428.5	1644.5	1277.1	1.1394	1.23986	1.0089
Pea15	790.7	770.4	662.1	952.6	951.3	629	1.1393	1.32908	1.2365
Triobp	5291.4	5312.1	4217.3	5599.1	5982.4	5302.8	1.13923	1.21534	1.05403
Sccpdh	1970.6	2196.5	1760.6	2247.7	2270.1	2235.1	1.13921	1.14169	1.02331
Rasa1	3484.8	3792.9	3381.7	3965.7	3855.1	4321.2	1.13909	1.09007	1.04556
Khnyn	72.7	73.2	68.5	76.4	70.3	97.5	1.13899	1.03529	1.04372
Taco1	712.3	786	721.8	899.2	922.4	706.8	1.13887	1.20812	1.14402
Adam17	1173.8	1332.3	1183.7	1441.4	1453.7	1306.9	1.13882	1.15068	1.08189
Cttn	10544	10822.6	9716.1	11597.6	11489	12310.2	1.13879	1.12405	1.07161
Mettl18	442.5	464.5	406	483.5	489.4	522.3	1.13877	1.11763	1.0409
Hnrnpd	566.8	623.7	647.7	610.6	573.6	908.7	1.13856	0.931414	0.978996
Mgll	233	207.1	133.5	241.5	225.2	186.3	1.13842	1.37023	1.1661
Tsc22d1	134.7	124.9	74.5	152.2	158.6	69.5	1.13828	1.55868	1.21857
Map3k3	1254.2	1362.3	1297	1442.7	1462.1	1549.3	1.13814	1.09232	1.05902
Pld1	598.1	639.6	548.9	665.8	634.9	732.6	1.13808	1.0944	1.04096
Dlat	6007.5	6563.4	5742.3	7011.2	6836.7	6992.9	1.13802	1.12532	1.06823
Serhl	1862.9	1784	1235.9	1966	1908.1	1681.8	1.13785	1.28286	1.10202
Rptor	2255.8	2463	2152.4	2509.5	2774.9	2533.9	1.13784	1.14495	1.01888
Lgals3bp	1265.5	960.5	401.6	1327.6	1239.5	422.5	1.13777	1.88466	1.3822
Hps4	57.2	53.9	51	61.7	53.9	68.8	1.13757	1.102	1.14471
Hs2st1	1091.4	1218.4	1092.5	1227.5	1180.3	1462.3	1.1375	1.04193	1.00747
Nsun6	353.7	405.7	368.8	409.4	384.8	489.1	1.13748	1.02544	1.00912
Layn	84.4	84.3	62.1	94.3	102.4	65.8	1.13735	1.34358	1.11862
Lin7c	1506.3	1552.9	1375.4	1708.2	1774.6	1559.9	1.13713	1.18936	1.10001
Fam117b	235.3	292.5	312.5	306.2	322.2	327.1	1.13709	1.03868	1.04684
Fchsd2	1604.5	1718.5	1416.2	1702.6	1595.3	2090.1	1.1369	1.05206	0.990748
Mxra7	122.7	89.6	68.2	104.9	116.2	97.8	1.1369	1.40114	1.17076
Tmed2	6455.5	6383.2	5723.2	7068.7	7210.6	6819.2	1.13666	1.17948	1.10739
Fer	4167.2	4267.2	3781.6	4173.6	4630.4	5081.2	1.13664	1.09383	0.978065
Hnrnph2	1475.1	1621.5	1364.6	1737.2	1678.6	1654.6	1.13656	1.1439	1.07135
Sdhc	1793.2	1871.1	1340	1860.5	1868.5	1957.9	1.1364	1.16128	0.994335
Ptms	1225.6	1224.5	1310.3	1414	1260.2	1598.9	1.13634	1.05499	1.15476
Uqcrc1	4908.5	5131.6	4738.5	5550.6	5454.9	5787.2	1.13628	1.11503	1.08165
Cbx8	1414.2	1465.8	1260.3	1464.7	1385.8	1853.3	1.1361	1.04563	0.99925
Mllt1	26.8	33.9	32.7	38.1	35.9	32.1	1.13597	1.11111	1.12389
Lipa	2298.1	2254	1951.6	2402.3	2454	2531.6	1.13595	1.15472	1.06579
Abhd11	751.1	754.9	663.5	793.4	859.4	811.6	1.13593	1.16526	1.051
Dab2	7319.1	7206.7	8635.8	7370.3	6177.9	12760.6	1.13588	0.855181	1.0227
Arfgef2	10882.5	11618.6	9050.7	11791.3	12582.1	11463.9	1.13582	1.17921	1.01486
Tab1	1399.6	1443.5	1365.5	1537.6	1401.6	1840.9	1.13579	1.04635	1.06519
Ptp4a1	1076.2	1232.1	1239.8	1288.3	1303.1	1438.4	1.13576	1.04834	1.04561
Bola3	482.3	511.8	394.4	545.1	481.6	550.3	1.13576	1.13297	1.06506
Abi2	1180.7	1374.4	1317.4	1439.2	1462.2	1496.8	1.13575	1.07787	1.04715
Dars2	1388.2	1475.8	1408.6	1490.7	1552.8	1809	1.13573	1.05516	1.0101
Ubtd2	618.7	561.8	566	631.8	663.2	688.3	1.13559	1.14825	1.1246
Ndufa5	1508	1584.2	1308.8	1748.7	1638.4	1610.6	1.13558	1.17079	1.10384
Cnnm3	1358.4	1339.2	1295.8	1351.5	1529.5	1653.7	1.13555	1.09336	1.00918
Fam160a1	696.3	739.9	625.1	769.3	802.8	768.3	1.1354	1.15172	1.03974
Itpr3	9909.7	10982.3	10521.3	11115.1	10557.9	13988.8	1.13525	1.00788	1.01209
Guk1	887.1	928.3	784.6	976.5	975.7	999.4	1.13523	1.1397	1.05192
Fbxl8	1224.3	1262.6	1181.2	1436.2	1319.2	1408.6	1.13519	1.12751	1.13749
Crip2	2571.1	2907.7	2954.9	3176.4	3129.7	3267.4	1.13515	1.07565	1.09241
Mff	128.4	133	107.9	151	156.6	111.6	1.13512	1.27688	1.13534
Uqcrq	1570.1	1697.3	1358.6	1666.8	1686.7	1897.3	1.13506	1.09739	0.98203
Arpin	1849.2	1946.1	1880.8	2188.8	2021.9	2232	1.13506	1.10029	1.12471
Tmem65	1227.3	1296.8	1111.9	1326	1312.9	1488.1	1.13504	1.09557	1.02252
Mtx2	1136.1	1196.2	966.8	1287.9	1214	1242.7	1.13504	1.15668	1.07666
Rictor	2104.6	2363.5	2121.4	2265.1	2445.4	2768.6	1.135	1.0503	0.958367
	560.8	666.3	578.9	697.5	598	754.2	1.13494	1.0404	1.04683
Tpd52l2	2337.3	2477.1	2249.4	2677.6	2507.3	2832	1.13493	1.09699	1.08094
Crtc2	201.1	230.3	192.7	225.3	246.2	236.8	1.13491	1.11466	0.978289
Casd1	124.6	152.3	123.5	144.6	147.1	162.7	1.13487	1.05765	0.949442
Ttc19	329.1	371.8	335.1	372.3	377.9	425.5	1.13485	1.06125	1.00134
Tomm6	522.3	489.6	387.5	565.3	587.1	435.7	1.13484	1.31388	1.15462
Arfgap3	4799.8	5626.5	4770.9	5627.2	5324.8	6293.4	1.13477	1.05334	1.00012
Cox6a1	47.3	44.4	36.7	49.7	54.3	41.7	1.13474	1.28237	1.11937
Tbc1d5	3462	3575.1	3119.9	3762.7	3689.9	4071.3	1.13458	1.11316	1.05247
Src	2456.3	2710.5	2502.9	2749.1	2865	3087.5	1.13454	1.07686	1.01424
Trpm7	955.9	1053.1	826.8	1001.1	975.1	1241.1	1.13453	1.05123	0.950622
Wipf2	100	100.8	105.4	125.7	131.5	90.1	1.13423	1.24733	1.24702
Tmem98	84.3	96.2	92.3	102.8	107.5	99.1	1.13416	1.11565	1.06861
Fbxo11	63.3	66	69	66.5	78.3	80.1	1.13414	1.07259	1.00758
Rab35	1309.6	1406.8	1424.1	1369.6	1588	1738.3	1.13414	1.04476	0.973557
Cox6c	1793	1907	1479.3	2068	1916.9	1888.5	1.13401	1.17677	1.08443
Shc1	2084.2	2219.1	1818.6	2314.8	2232.9	2394	1.13391	1.12631	1.04313
Xrcc6	2642.3	2894.5	3101.9	2943	2744.3	4108.2	1.13391	0.948452	1.01676
ptplad1	1694	1796.1	1400.9	1787.7	1967.7	1790.2	1.13384	1.17466	0.995323
Mtnd1	1071.9	1153.7	856.8	1129.1	1167.5	1198.2	1.13379	1.1423	0.978677
Tmed10	8509	9362.5	8901.7	10315.5	10079.2	9959.9	1.13377	1.11665	1.10179
Atp6v1a	8875.6	9138.6	7765.5	9808.2	10122.3	9294.8	1.13366	1.17903	1.07327
Plcg1	3781.6	4032.6	3727.9	4168	4018.9	4897.3	1.13361	1.05494	1.03358
Gnb4	3911.5	4148.3	3445.1	4317.7	4456.1	4267.7	1.13356	1.15545	1.04084
Cycs	6827.9	8145.1	7614.6	9365.7	9158	7080.2	1.13354	1.17538	1.14986
Mpp2	618.7	664.1	526.1	610.7	834.8	604.8	1.13345	1.2145	0.91959
Ggt7	564.6	568.2	491	598.6	692.6	549.2	1.13339	1.21903	1.0535
Syne2	9048.5	10004.6	11213.3	10551.4	9356.4	14395.2	1.13337	0.938255	1.05465
Mrpl52	598.2	739.4	884.5	923.6	876.3	718.5	1.13334	1.10838	1.24912
Heg1	354.9	474	457.4	432.6	600.5	424.5	1.13317	1.10919	0.912658
Babam1	788.3	776.6	675.6	872.5	820.4	845.6	1.13301	1.16575	1.12349
Dusp7	34.5	30.8	43	33.4	37.6	51.7	1.13296	0.96206	1.08442
Trp53bp1	3670.7	3863.7	3371.4	3773.6	3778.6	4803.3	1.13293	1.04383	0.97668
Ppcs	1394.4	1378.6	1139.8	1505.6	1458.6	1468.5	1.13287	1.17702	1.09212
Tmem168	538.6	611.9	484.2	553	577	721.8	1.13281	1.03093	0.903742
Cdc16	5881.3	6494.6	5792.2	6676.2	5886.6	8017.3	1.13276	1.02246	1.02796
Atox1	3354	2941.4	2388.4	3331.6	3556.8	2947.8	1.13271	1.29243	1.13266
Ndufc2	1068.6	1054.8	899.1	1167.1	1125.3	1131.2	1.1327	1.17324	1.10647
Ndufa9	3763	4116.3	3497.5	4220.9	4304.8	4360.4	1.13266	1.11977	1.02541
B3galt6	456.9	506.6	410.9	511.3	496.1	549.2	1.13257	1.09798	1.00928
Cog1	4472	4752.9	4151.1	4967.2	4934.1	5247.5	1.13254	1.11201	1.04509
Immt	635.7	865.2	1202.9	1024.8	980.8	1056.2	1.13241	0.969779	1.18447
Acot9	6128.6	6694.8	6186.1	7282.1	7415.2	6829	1.1324	1.14101	1.08772
Rnf123	645	698.9	596.5	705.4	761	730.9	1.1324	1.13201	1.0093
Gpn1	237	257.6	248.2	245.6	349.2	246.3	1.13234	1.17596	0.953416
Cdk16	358.8	416.8	401.9	431.8	447	454.5	1.13231	1.07341	1.03599
Cmc4	94.5	56.9	48.3	69.9	56.4	99.8	1.1322	1.20057	1.22847
Fmnl2	1867.3	2107	1864.6	2311.3	1883.9	2414.9	1.13208	1.0563	1.09696
Mbtps1	618.5	647	569.1	677	694.9	704.8	1.13196	1.12811	1.04637
Hlcs	525.9	534.3	471	578.9	595.2	559.1	1.13192	1.16791	1.08347
Gnas	3071	3388.1	2951.4	3239	3622.3	3789.9	1.13184	1.08231	0.955993
Slc30a1	61.7	70.7	74.7	72.4	86.8	75.2	1.13182	1.09491	1.02405
Bola1	629.2	656.2	530.9	649.8	673.1	732.7	1.13175	1.1144	0.990247
Pqlc3	132	151.4	129.5	158.2	167.8	141.3	1.13175	1.16056	1.04491
Rabgap1l	2041.1	2164.1	1969.9	2246.2	2188	2553.9	1.13166	1.07262	1.03794
Ptdss2	357.2	393.3	313.3	366.1	408.4	429.2	1.13151	1.09609	0.930842
Gpr108	87.5	99.4	87.7	108.4	103.7	98.6	1.13146	1.13362	1.09054
Lzic	1959.9	1947	1527.7	2117.8	2022.4	2008.7	1.13144	1.19153	1.08772
Fyn	304.7	328.7	313.9	321.9	351.8	398.1	1.13143	1.0484	0.979312
Abca1	947	1383.9	798.5	1392.2	1399.7	748.7	1.1314	1.27928	1.006
Braf	2098	2214.3	1922.1	2206.6	2583.7	2262.1	1.13121	1.15808	0.996523
Rbbp5	434	463.7	554.5	491.9	484.8	666	1.13118	0.959242	1.06082
Pgam2	3299.8	3569.8	3033.9	3779.6	3883.6	3539.3	1.13117	1.16044	1.05877
Pomk	284.8	308.4	295.3	309.2	322.2	373.6	1.13112	1.04588	1.00259
Rap2c	1324	1324.6	1056.7	1484.1	1469.8	1237.2	1.13111	1.24046	1.12041
Eef2k	1019.9	1044.6	1220	1172.3	957	1585.8	1.1311	0.940254	1.12225
Cul9	187.9	201.6	175.5	208.2	196	234.8	1.13097	1.07186	1.03274
Pitpnm1	1654	1755.5	1555	1835.9	1982.6	1795.6	1.13085	1.15345	1.0458
Pigt	2228.6	2379.2	1895.3	2436.7	2663.7	2253.5	1.13083	1.19322	1.02417
Atp5e	1478.2	1751.1	1566.8	1766.6	1810.2	1845.9	1.13065	1.07803	1.00885
Jmjd7	427.2	476.1	435.6	482.5	514.6	516.7	1.13063	1.09367	1.01344
Psmb9	688.7	588.8	260.6	730.9	714.6	293.5	1.13062	1.70179	1.24134
Tbc1d20	610.2	642.8	572.3	696.9	694.4	672.4	1.13061	1.14501	1.08416
Rab10	3936.9	4123.7	3692.5	4460.7	4281.5	4545.4	1.13056	1.11847	1.08172
Trmt11	180.2	209.2	172.2	205.8	226.4	202.7	1.13052	1.13319	0.983748
Foxo6	118.3	141.2	122.9	142.4	137.9	152	1.13049	1.06134	1.0085
Xpnpep3	786.1	907.9	853	1005.9	902	971.4	1.13047	1.08348	1.10794
Cept1	1018.1	1152.5	964.5	1226.1	1255.5	1062.5	1.13046	1.17222	1.06386
Fkbp14	1062.9	1240	1126.1	1307.7	1167.5	1400.9	1.13039	1.04611	1.0546
Ryk	398.4	355.8	297.4	371.2	410.1	407.4	1.13037	1.19611	1.04328
Znf346	399.7	410.8	456.3	452.6	490.4	488.9	1.13033	1.08753	1.10175
Golga4	7071.8	7601.4	6514.1	7529.4	7816.2	8595.9	1.12999	1.08715	0.990528
Mtx1	972	1029.8	958.6	1129.2	1144.7	1071.2	1.12995	1.14358	1.09652
Sco1	763.7	840.1	749.3	883.1	916.9	858.8	1.12991	1.1325	1.05118
Ubxn6	1775.2	1939.4	1738.4	1935.2	1977.4	2247.8	1.12973	1.06384	0.997834
Atp5d	545.9	523.5	471.9	584.2	620.9	536	1.12963	1.21067	1.11595
Dym	749.1	775.6	730.1	749.5	796.5	1000.9	1.12955	1.02676	0.966349
Chchd3	3297.2	3364.1	2681.5	3587.6	3418.4	3545.4	1.12936	1.15886	1.06644
Plce1	370.6	414.8	370.4	417.6	428.8	458.9	1.12935	1.07794	1.00675
Zbp1	1002.8	1007.4	406	1057.1	1435.4	236	1.12925	1.76348	1.04933
Mid1	5227.9	5881.3	3882.4	5635.2	5847.3	5446.8	1.12925	1.17604	0.958156
Dcun1d2	438.5	461.2	460.4	493.2	550.7	491.8	1.12911	1.1327	1.06938
Evc	441	454	429.3	456.1	534.2	504.8	1.12897	1.12114	1.00463
Supv3l1	2722.4	3038.6	2459.7	3002.5	3107.8	3169.9	1.12888	1.11131	0.98812
Lpp	7118.1	7785.7	7764.6	8339.8	7993.7	9253.7	1.12876	1.05037	1.07117
Ap1m1	4808.5	5041.1	4486.2	5315.4	5371.8	5492.9	1.12865	1.12174	1.05441
Bfar	303.4	317.4	256	328.7	344.3	316.6	1.12865	1.1737	1.0356
Arhgap35	5849.5	6619.2	5589.6	6626.9	7004.9	6749.1	1.12862	1.11656	1.00116
Mtm1	1730.3	1970.3	1563.1	1932.9	2163.8	1844	1.12862	1.15942	0.981018
Rab12	1911.7	2076.9	1938	2076.1	2091.8	2520.6	1.12856	1.03811	0.999615
Srgap2	4735.4	5049.6	4314.1	5096.5	4908.3	5906.8	1.12855	1.06847	1.00929
Ogdh	12431.8	13915.3	11908.7	13981.8	13906.8	15284	1.12852	1.07995	1.00478
Ccdc109b	1244.2	1346.6	1461.9	1376.8	1485	1711.5	1.12846	1.01898	1.02243
Lcmt1	1396.7	1420.8	1160	1403.4	1491.8	1592.5	1.12827	1.12182	0.987753
Gmfb	4248.5	4249.6	3617.9	4597.1	4620.7	4451.5	1.1282	1.17163	1.08177
Syvn1	736.4	846.5	772.8	892.8	931.4	833.5	1.1282	1.12654	1.0547
Anxa7	6850.2	7451.1	6668.8	7948	7630.4	8076.7	1.12804	1.10329	1.06669
Cmas	2267.1	2695.4	2742.6	2624.3	2815.7	3251.4	1.12801	1.00037	0.973622
Glud1	16318	17802.5	14274.6	18127.4	17699.2	18761.5	1.12797	1.11689	1.01825
Vps51	1905.1	1982.6	1723	2106.3	2161.7	2060.4	1.12792	1.15177	1.06239
Myo1c	21139.4	23077.3	20473.5	22656.3	25521.9	24785.2	1.12789	1.10625	0.981757
Surf1	175.5	190	177.3	198.3	225	188.9	1.12786	1.15246	1.04368
Rgs12	490.2	497.9	491	515	586.3	566.8	1.12778	1.11366	1.03434
Sucla2	10785.8	11577.1	9706.1	11870.2	11395.4	12898.6	1.1277	1.09314	1.02532
P4ha1	893.6	1002	854	1033.3	1072.8	994.2	1.12755	1.13475	1.03124
Myo18a	6132.4	6422.1	5567.9	6151.5	6934.3	7346.7	1.12747	1.09139	0.957864
Coq6	1049.2	1194.8	1153.4	1232.6	1165.4	1432.4	1.12745	1.02121	1.03164
Tprkb	24.1	39.2	36.4	40.9	33.8	37.7	1.12738	0.988095	1.04337
Anapc1	4997.6	5256.1	5261.4	5647	5501.9	6342	1.12735	1.06003	1.07437
Cog7	4550.8	4862.5	4225.7	5162.6	4902	5309	1.12718	1.10744	1.06172
Lace1	866	897.2	756.9	934.6	953	952.8	1.1271	1.14116	1.04169
Fbxw5	120.4	138.4	110.1	145	141.1	129.6	1.12686	1.15131	1.04769
Cnksr3	628.9	642.2	513.3	628.2	723.5	658.9	1.12677	1.1698	0.9782
Ap2a1	15073.7	16127.2	13502	16555.6	16574.2	17237.8	1.12672	1.11815	1.02656
Igsf3	894.5	873.5	917.2	964.5	766.7	1294.1	1.12666	0.966773	1.10418
2210016F16Rik	3722.6	4158	3798.1	4536	4362.9	4258.1	1.12658	1.1185	1.09091
Dhrsx	441	471.5	372.9	506	556.2	385.9	1.12658	1.25793	1.07317
Kif1b	695.6	723.2	619.8	780.4	673.4	842.7	1.12651	1.0825	1.07909
Tsnax	3381.7	3598	2923.4	3722.8	3457.3	3975.2	1.12645	1.10101	1.03469
	849.6	963.4	894.6	984.1	1025.2	1040.5	1.12638	1.08143	1.02149
Ndufb5	2779.3	2895.1	2383.1	3038.1	2915.4	3122.1	1.12635	1.12794	1.04939
Arl5a	237.8	280.1	215.9	273	260.8	292.7	1.12633	1.07621	0.974652
Top1mt	82.2	89.4	55	86.7	90.5	78	1.12621	1.22715	0.969799
Commd1	307.3	393.6	355.5	413.8	376.5	399.3	1.12609	1.055	1.05132
Ift43	214.4	212.8	178.8	210.1	205.4	266.9	1.12607	1.06103	0.987312
Rab27b	64.3	63.2	40.7	71.5	54.3	63.6	1.12604	1.21078	1.13133
Nat9	221.4	216.9	196.7	241.3	260.9	212.8	1.12598	1.21422	1.11249
Shoc2	2568.8	3034	3125.6	3241.9	3279.8	3306.1	1.12596	1.05879	1.06852
Anks1a	644.9	680.7	749.8	742.3	786.8	807.6	1.1259	1.06893	1.0905
Gng10	126.3	135.4	166.7	161.7	125.7	194.9	1.12582	0.951341	1.19424
Ralb	1554.3	1711.9	1577.5	1746	1821.4	1885.7	1.12581	1.08451	1.01992
Wdr81	1571.1	1660.4	1403.3	1782.2	1753.7	1681.9	1.12579	1.15413	1.07336
Crk	91.7	87.2	84.3	100.6	99.8	95.9	1.12576	1.16851	1.15367
Commd7	887.8	934.1	844.6	964.8	952.1	1084.9	1.12575	1.0777	1.03287
Cln8	259.4	305.9	266.1	295.7	355	285.2	1.12569	1.13759	0.966656
Ahcyl2	4743.9	5107.1	4456.4	5059.6	5078.1	5966.7	1.1256	1.06004	0.990699
Cr1l	2332.8	2634.2	2032	2599.2	2706.5	2572.1	1.12556	1.13705	0.986713
Mtco2	4002.5	4092.4	4082.3	4809.9	4616.7	4277	1.12535	1.15314	1.17532
Capza2	4705.1	4870.3	4175.8	5381.3	5254.8	4838.6	1.12533	1.17577	1.10492
Banf1	2565.8	1902.7	1602.2	1957.8	3053.8	1819.9	1.12532	1.42988	1.02896
Ap2b1	11491.8	12206.6	10819.2	12915.5	12908.3	13019.4	1.12532	1.12152	1.05808
Ptrf	9238.4	9814.2	8000.9	9769.5	11163.8	9510.1	1.1253	1.17503	0.995445
Plekhm2	1698	1634.1	1551	1843.6	1699.8	1951.1	1.12521	1.11249	1.12821
Rab7l1	296.9	320.4	293.5	349.4	329.1	346.2	1.12505	1.10523	1.09051
Arid5b	89.9	173.8	297.1	254.2	226.2	150.5	1.125	1.02017	1.4626
Ndufb10	1718.9	1900.6	1579.5	1953.9	1905.8	1989.1	1.12499	1.10908	1.02804
Hook2	603.6	755.5	635.1	736.3	738.3	768.4	1.12476	1.06041	0.974586
Gmds	5731.8	5948.3	4991.3	6343.7	6278.7	6128.4	1.12473	1.15383	1.06647
Nfib	370.3	368.7	344.8	353.7	331.3	533.9	1.12465	0.960056	0.959317
Praf2	805.7	875.3	763.1	884.9	957.9	905.8	1.12459	1.12476	1.01097
Sncg	220.4	222.3	165.8	225.6	237.6	221.1	1.12457	1.19351	1.01484
Mmp14	7221.6	7101.5	6451.9	8406.3	6852.7	8102.4	1.1245	1.12584	1.18374
Npc1	809.2	849.1	674	908.8	841.3	872.5	1.12447	1.14904	1.07031
Abcc1	3144.1	3506.1	3304	3525	4258.8	3409.3	1.12446	1.14298	1.00539
Setd7	888.7	941.7	867.4	1014	925.3	1094.2	1.12443	1.07197	1.07678
Unc119	109.5	144.9	117.2	131.6	128.2	158	1.12433	0.991225	0.908213
Pxn	3742.2	3890.4	3456.5	4043.5	3950.7	4473.5	1.12432	1.08811	1.03935
Vps13c	13068.9	14175.5	13618.4	14461.3	14796.9	16678.7	1.12417	1.05268	1.02016
Coq7	444.5	400.7	320.7	437	373.1	500.3	1.12394	1.12296	1.09059
Dpy19l4	470.9	459.3	377.8	452.8	521.6	495.7	1.12393	1.16402	0.985848
Cox4i1	4892.1	5020.3	4304.3	5615.1	5439.9	4923.2	1.1239	1.18557	1.11848
Mvb12b	95.3	103.1	97.1	95.4	122.4	114.3	1.12386	1.08791	0.925315
Adat1	39.3	40	50.7	50	51.9	44.2	1.12385	1.12348	1.25
Poglut1	2414	2706	2089.3	2636.2	2697.8	2768.1	1.12384	1.11234	0.974205
Gba	9237.2	8498	5417.3	9974.9	8304.4	7739.2	1.12379	1.31361	1.17379
Dhrs4	2682.2	2909.2	2794.4	3094.5	2860.9	3468.2	1.12376	1.04415	1.06369
Cul5	6000.3	6251.8	5191.6	6148.6	6517.6	6934.8	1.12367	1.10686	0.983493
	528.2	623.8	576.6	659.1	639.9	643.2	1.12357	1.08214	1.05659
Apeh	6334.6	6431.9	5455.7	6878.9	6916.3	6677.9	1.12353	1.16047	1.0695
Tpm4	4649.3	4957.6	4184.3	4929.5	5617.4	4946.4	1.12342	1.15369	0.994332
St5	611.5	701.2	575.4	664.3	789.3	667.4	1.12335	1.13865	0.947376
Ppp2r5b	542.4	517.7	410.7	533.4	596.4	522.3	1.12327	1.21693	1.03033
Fermt2	9513.6	10482.3	10861.9	10864	11174.7	12622.8	1.12327	1.03254	1.03641
Akap2	93.1	94.3	77.1	96.6	113	87.5	1.12325	1.22287	1.02439
Thnsl1	321.4	350.7	326.3	373.3	370.7	377.4	1.1232	1.09897	1.06444
Akr1b10	2791.1	2957	2429.5	3159.2	3365.5	2660.1	1.12317	1.21131	1.06838
Agap3	747.3	877.8	751.6	838.2	848	982.9	1.12303	1.03486	0.954887
Mrpl21	38.9	35.7	42.6	44.1	44.1	43.4	1.12287	1.12644	1.23529
Dnajb2	779.8	852.5	742.2	884	961.6	820.6	1.12285	1.15733	1.03695
Dock5	5938.2	6254.8	6332.4	6367.7	6710.9	7721.4	1.12278	1.03904	1.01805
Ireb2	1038.3	1253.5	806	1241.6	1427.7	808.8	1.12276	1.29609	0.990507
Mical2	325.7	398.2	431.1	352.2	441.7	502.7	1.1226	0.957313	0.88448
Nek3	188.3	170.9	154.1	177.4	178.4	220.4	1.12254	1.09477	1.03803
Nln	5744.1	6195.3	5831.9	6586.3	6294.3	7066.2	1.12242	1.07096	1.06311
Tia1	2574.3	2667.3	2321.3	2846.2	2803.2	2838.7	1.12233	1.13246	1.06707
	80.3	92.3	108.7	91.6	81.7	142.4	1.12229	0.862189	0.992416
Sec11a	2425	2707.8	2471	2820.7	2919.4	2793.4	1.12227	1.10838	1.04169
Cdk5rap3	5046.3	5109.8	4659	5715	5524.8	5386.1	1.12223	1.15058	1.11844
Nek6	1982.8	2765	2089.2	2622.7	2730.5	2319.3	1.1222	1.1028	0.948535
Cox5a	1700.2	1053.8	752.1	1213.5	1796.9	923.5	1.12202	1.66698	1.15155
Tsr2	662.9	755.5	776.6	794.1	747.4	921.2	1.12196	1.00614	1.05109
Apoo	1178.1	1178.3	924.3	1213.7	1240.3	1226.8	1.12196	1.16713	1.03004
Tnfaip3	148.9	239.1	197.6	259.6	248.2	149.2	1.12193	1.16281	1.08574
Stard3	212.3	205.9	181.5	232.5	232.3	207.9	1.12173	1.19979	1.12919
Capg	6663.6	7144.5	6919.3	7641.6	7578.4	8029.4	1.12167	1.08221	1.06958
Dlg5	1587	1715.9	1459.9	1661.3	1716.7	1964.3	1.12167	1.06367	0.96818
Lamtor3	896.3	771	688.3	916.2	843.1	882.8	1.12163	1.20558	1.18833
S1pr2	29.3	35.3	42.3	42.7	45.7	31.5	1.12161	1.13918	1.20963
Atg12	621.7	678.4	655.8	742.6	704.4	746.7	1.12158	1.08455	1.09463
Sdha	9265.3	9887.6	8991.7	10919.7	10078.2	10567.1	1.12153	1.11222	1.10438
Tom1	1816.5	1810.7	2045.5	2058	2029.1	2274.9	1.12151	1.05988	1.13658
Pvrl1	452.3	456.6	439.6	526.7	529.3	456.3	1.12147	1.17831	1.15353
Snx12	3597.1	3799.1	3137	4078.3	3703.3	4030.8	1.12144	1.1219	1.07349
Nutf2	4670.4	4033.6	3372.6	4827.3	4615.2	4100.4	1.12142	1.27495	1.19677
Prkcd	4272.4	4703.2	4429.1	4931.2	4976	5123.1	1.12127	1.08485	1.04848
Atad3	2179.3	2415.5	2330.3	2432.5	2571	2761.3	1.12125	1.0543	1.00704
Ndufa12	1217.2	1299.9	1164.3	1409.2	1312.8	1405.2	1.1211	1.10462	1.08408
Senp8	513.6	514.6	458.4	583.5	557.7	525.4	1.12108	1.17287	1.13389
Rabl6	1557.7	1671.2	1437.2	1684.1	1634.9	1911.9	1.12104	1.06775	1.00772
Usp46	101.9	107.6	79.7	93.6	125.4	105.2	1.12102	1.16925	0.869888
Swsap1	54.4	48.4	55.9	57.8	67.1	53	1.12098	1.19751	1.19421
Ubr3	1067.3	1088.1	1011.3	1090.8	1165.2	1293.7	1.12095	1.07459	1.00248
Dynll2	1698.9	1610.6	1146.4	1784.7	1717.3	1492.8	1.12094	1.27022	1.1081
Lyrm4	1332	1395.7	1067.1	1442	1364.4	1446.9	1.12082	1.13952	1.03317
Osbpl1a	3193.4	3386.3	2975.2	3382.3	3397.3	3929.4	1.12079	1.06572	0.998819
Cav2	1208.5	1187.8	921.2	1244.9	1341	1131.9	1.12066	1.22613	1.04807
Lrrc49	154.3	189.7	193.9	173.3	192.1	237.4	1.12065	0.952555	0.913548
Tprn	289.3	300.2	297.5	294.7	308.2	391.1	1.12063	1.0087	0.981679
Rin3	140.5	144.5	126.5	149.8	147.5	163.8	1.12053	1.09705	1.03668
Tbc1d13	1306.7	1481.5	1289.9	1556.8	1542.6	1469.6	1.12037	1.11835	1.05083
Gpr180	200	268.6	254.9	247.7	250.9	311.9	1.12025	0.952436	0.922189
Inpp4a	660.4	726.5	654.8	738.3	817	731.6	1.1201	1.12597	1.01624
Parl	695	771.7	650.3	745.1	772.3	853.8	1.12008	1.06709	0.965531
Galm	610	626.1	528.5	657.9	619.3	698.8	1.1198	1.10618	1.05079
Abhd10	1820.4	1815.7	1737.6	2033.5	1822.4	2160.4	1.11958	1.08516	1.11995
Nt5c	3743.1	3912.3	3393.5	4350.3	4144.6	3874.9	1.11955	1.16276	1.11195
Mapkap1	557.3	647.5	589.3	624	656.4	727.9	1.11939	1.03525	0.963707
Vps16	1667.9	1821.6	1498	1896.1	1818.8	1867.8	1.11934	1.11908	1.0409
Arhgef7	2483.9	2788.6	2355	2804	2839	2894.2	1.11927	1.09709	1.00552
B3gnt1	256.9	292.3	285.4	316.4	295.2	322.5	1.11922	1.05868	1.08245
	219.3	253.5	263.3	255.7	271.8	296.3	1.11914	1.0207	1.00868
Ptprk	580	663	774	681.8	816.2	759.3	1.11914	1.04245	1.02836
Got2	13033.1	14688.4	11881.8	14968.5	14913.9	14434.6	1.11902	1.12466	1.01907
Maf1	123.2	144.8	135.4	155.9	151.1	144.4	1.11899	1.09565	1.07666
Kif3a	3083.4	3266.5	2565.2	3201.9	3562.1	3211.7	1.11897	1.15987	0.980223
Epha4	226.5	275.8	309.7	276	298.8	333.8	1.11897	0.981725	1.00073
Slc20a2	129.8	157.4	187.9	173	185.9	172.7	1.11892	1.03939	1.09911
Fn1	30058.3	35276.4	31342.1	36966	34173.6	37032	1.1189	1.06787	1.0479
Stat5b	497.9	540.5	545.2	579.2	562.8	629.8	1.11884	1.05186	1.0716
Sdhb	7371.3	7908.6	6121.3	8233.6	7519.5	8191	1.11882	1.12282	1.04109
Stx11	701	761.3	515.9	691.4	891.9	629.9	1.11879	1.23966	0.908183
Rufy1	2629.5	2722.4	2459.4	2844	2762.1	3132.6	1.11873	1.08188	1.04467
Camk2g	109	114.4	78.2	107.1	113.9	116.4	1.1187	1.14746	0.936189
Mocos	56.5	64.1	45.4	68	75.5	42.2	1.11867	1.3105	1.06084
[truncated: 5,646 more rows]
